# Supplementary material
Source: PubMed Central journal article supplement (PMC5760165)
Supplement: NIHMS930225-supplement-SuppTable.pdf [file NIHMS930225-supplement-SuppTable.pdf]

**Supplementary Figure 1.** A) List of previously known and newly identified binding partners of EZH2 after LC-MS/MS analysis of EZH2-interactome. B) Co-immunoprecipitation. HA-TRIM28 was overexpressed in HEK-293T cells, HA beads were used to immunoprecipitate TRIM28, and EZH2 was analyzed by western blotting. C) *in vitro* binding assay, *E. coli*. purified MBP-EZH2 was incubated with GST-TRIM28 full length, and RBCC fragment, MBP beads were used to pull down MBP-EZH2, and immunoblotted with GST antibody. D) *E. coli*-purified GST-EZH2 was incubated with MCF7 cell lysates followed by GST-pull down, and immunoblotting with TRIM28 and GST antibodies (\*non-specific band). E) Distribution of co-occupied 10,882 genomic sites of TRIM28 and EZH2. Peaks are categorized as TSS (+/-3Kb), 5'UTR, 3'UTR, genic (coding exon + intron), or intergenic. F) Histogram of the count of overlapping nucleotides between EZH2 and TRIM28 co-occupancy from ChIP-seq.

**Supplementary Figure 2.** A) EZH2, TRIM28, RBBP4, EED, SUZ12 protein levels were analyzed by western blotting in shControl and sh*EZH2* MCF7 cells. B) TRIM28, EZH2, and TRIM33 protein levels were analyzed by western blotting in shControl and sh*TRIM28* MCF7 cells. C) Functional annotation analysis of down-regulated genes in sh*EZH2* cells (EZH2 activated genes). D) Functional annotation analysis of up-regulated genes in sh*EZH2* RNA-seq (EZH2 repressed genes). E) Functional annotation analysis of down-regulated genes in sh*TRIM28* cells (TRIM28 activated genes). F) Functional annotation analysis of up-regulated genes in sh*TRIM28* RNA-seq (TRIM28 repressed genes). G) KEGG pathway analysis of down-regulated genes in sh*EZH2* cells (EZH2 activated genes). H) KEGG pathway analysis of down-regulated genes in sh*TRIM28* cells (TRIM28 activated genes). I) List of TRIM28/EZH2 co-activated genes and its association with cancer.

| <b>chr</b> | <b>start</b> | <b>end</b> |
|------------|--------------|------------|
| chr1       | 569795       | 570054     |
| chr1       | 2360923      | 2362223    |
| chr1       | 2568216      | 2569775    |
| chr1       | 2583748      | 2586625    |
| chr1       | 2583748      | 2583977    |
| chr1       | 2584425      | 2584590    |
| chr1       | 2585501      | 2586503    |
| chr1       | 2615853      | 2616060    |
| chr1       | 2616209      | 2616367    |
| chr1       | 2629170      | 2629374    |
| chr1       | 6427750      | 6428639    |
| chr1       | 9884995      | 9885816    |
| chr1       | 11565345     | 11567214   |
| chr1       | 16832569     | 16833711   |
| chr1       | 16833235     | 16833518   |
| chr1       | 16893609     | 16894203   |
| chr1       | 16931899     | 16932860   |
| chr1       | 16934277     | 16936323   |
| chr1       | 16947256     | 16948786   |
| chr1       | 16950164     | 16951381   |
| chr1       | 16951948     | 16952776   |
| chr1       | 16963138     | 16964195   |
| chr1       | 16970122     | 16972034   |
| chr1       | 16938235     | 16945639   |
| chr1       | 17027585     | 17028460   |
| chr1       | 17039732     | 17040756   |
| chr1       | 17051037     | 17052148   |
| chr1       | 17053329     | 17054938   |
| chr1       | 17231638     | 17232991   |
| chr1       | 17481225     | 17482529   |
| chr1       | 18737844     | 18739155   |
| chr1       | 20485956     | 20487925   |
| chr1       | 22777806     | 22778674   |
| chr1       | 23319291     | 23320852   |
| chr1       | 23688659     | 23689670   |
| chr1       | 27019319     | 27019811   |
| chr1       | 27470813     | 27471704   |
| chr1       | 27648236     | 27649121   |
| chr1       | 29705418     | 29706763   |
| chr1       | 30039716     | 30040840   |
| chr1       | 30078955     | 30079526   |

|      |           |           |
|------|-----------|-----------|
| chr1 | 30315009  | 30315774  |
| chr1 | 30515268  | 30516556  |
| chr1 | 30564789  | 30566237  |
| chr1 | 31099720  | 31100474  |
| chr1 | 30078955  | 30081182  |
| chr1 | 31930717  | 31932183  |
| chr1 | 31939335  | 31940682  |
| chr1 | 33958970  | 33961854  |
| chr1 | 38455562  | 38456248  |
| chr1 | 41804114  | 41804969  |
| chr1 | 43711835  | 43713408  |
| chr1 | 43728146  | 43730168  |
| chr1 | 46218550  | 46219882  |
| chr1 | 46858588  | 46859893  |
| chr1 | 47235851  | 47237000  |
| chr1 | 47994798  | 47995600  |
| chr1 | 48653096  | 48654597  |
| chr1 | 61430531  | 61431868  |
| chr1 | 85070445  | 85071408  |
| chr1 | 85690394  | 85691281  |
| chr1 | 85980353  | 85981250  |
| chr1 | 85986578  | 85989719  |
| chr1 | 85994125  | 85994923  |
| chr1 | 86003105  | 86004972  |
| chr1 | 86025216  | 86026366  |
| chr1 | 86003750  | 86003878  |
| chr1 | 106806639 | 106806903 |
| chr1 | 106834027 | 106834147 |
| chr1 | 106961276 | 106962385 |
| chr1 | 107057907 | 107058177 |
| chr1 | 107162380 | 107162895 |
| chr1 | 107315740 | 107315945 |
| chr1 | 107316219 | 107316364 |
| chr1 | 107319346 | 107332221 |
| chr1 | 107360814 | 107361326 |
| chr1 | 107434706 | 107435364 |
| chr1 | 107495608 | 107496120 |
| chr1 | 107496484 | 107497504 |
| chr1 | 107540957 | 107541669 |
| chr1 | 107552965 | 107553166 |
| chr1 | 107572081 | 107575162 |
| chr1 | 107598940 | 107601383 |
| chr1 | 107624198 | 107624713 |

|      |           |           |
|------|-----------|-----------|
| chr1 | 107677784 | 107686676 |
| chr1 | 107719093 | 107729249 |
| chr1 | 107727723 | 107727929 |
| chr1 | 107751223 | 107752569 |
| chr1 | 107763729 | 107764760 |
| chr1 | 107764170 | 107764818 |
| chr1 | 107794028 | 107794670 |
| chr1 | 107863792 | 107864292 |
| chr1 | 107867044 | 107867272 |
| chr1 | 107917700 | 107917877 |
| chr1 | 107919374 | 107921502 |
| chr1 | 107927834 | 107931133 |
| chr1 | 107930212 | 107930314 |
| chr1 | 108320267 | 108320435 |
| chr1 | 108479447 | 108479662 |
| chr1 | 108501993 | 108502950 |
| chr1 | 108505330 | 108508579 |
| chr1 | 108505668 | 108505934 |
| chr1 | 108506205 | 108507603 |
| chr1 | 108508201 | 108508466 |
| chr1 | 108558891 | 108559630 |
| chr1 | 108559276 | 108559518 |
| chr1 | 108590173 | 108591699 |
| chr1 | 108598748 | 108599468 |
| chr1 | 108591044 | 108591247 |
| chr1 | 108662654 | 108662865 |
| chr1 | 108662981 | 108663081 |
| chr1 | 108741798 | 108744011 |
| chr1 | 108871396 | 108871542 |
| chr1 | 108899751 | 108900900 |
| chr1 | 109782367 | 109784359 |
| chr1 | 109791207 | 109792637 |
| chr1 | 109805791 | 109807037 |
| chr1 | 109817017 | 109818305 |
| chr1 | 109825091 | 109826175 |
| chr1 | 109841422 | 109842535 |
| chr1 | 109997551 | 109999462 |
| chr1 | 110036074 | 110037240 |
| chr1 | 110090681 | 110092009 |
| chr1 | 110276947 | 110277172 |
| chr1 | 110283528 | 110284838 |
| chr1 | 110358732 | 110359580 |
| chr1 | 110664856 | 110667383 |

|      |           |           |
|------|-----------|-----------|
| chr1 | 110674568 | 110675842 |
| chr1 | 110707556 | 110708892 |
| chr1 | 112055641 | 112056718 |
| chr1 | 112289611 | 112290674 |
| chr1 | 112297589 | 112298554 |
| chr1 | 112297881 | 112298096 |
| chr1 | 112565891 | 112574363 |
| chr1 | 112365167 | 112443083 |
| chr1 | 112483574 | 112551698 |
| chr1 | 112552755 | 112565238 |
| chr1 | 112443519 | 112481753 |
| chr1 | 112398849 | 112398990 |
| chr1 | 112399075 | 112399205 |
| chr1 | 112399406 | 112399573 |
| chr1 | 112399702 | 112399819 |
| chr1 | 112399935 | 112400147 |
| chr1 | 112412166 | 112412363 |
| chr1 | 112439775 | 112439898 |
| chr1 | 112445816 | 112445947 |
| chr1 | 112449472 | 112449582 |
| chr1 | 112449642 | 112449747 |
| chr1 | 113757223 | 113758265 |
| chr1 | 114414190 | 114415406 |
| chr1 | 114438150 | 114439267 |
| chr1 | 114447082 | 114447211 |
| chr1 | 114460599 | 114461165 |
| chr1 | 114471326 | 114472227 |
| chr1 | 114472845 | 114473518 |
| chr1 | 114515779 | 114515885 |
| chr1 | 114521845 | 114527343 |
| chr1 | 114530566 | 114530701 |
| chr1 | 114530579 | 114530787 |
| chr1 | 114532272 | 114532472 |
| chr1 | 114535399 | 114536243 |
| chr1 | 114539892 | 114561910 |
| chr1 | 114567478 | 114572732 |
| chr1 | 114573247 | 114725438 |
| chr1 | 114577260 | 114577434 |
| chr1 | 114596830 | 114597223 |
| chr1 | 114630574 | 114630679 |
| chr1 | 114632545 | 114632713 |
| chr1 | 114641711 | 114641837 |
| chr1 | 114671362 | 114671526 |

|      |           |           |
|------|-----------|-----------|
| chr1 | 114675656 | 114675773 |
| chr1 | 114691661 | 114704486 |
| chr1 | 114708458 | 114708564 |
| chr1 | 114730171 | 114747627 |
| chr1 | 114747837 | 114785765 |
| chr1 | 114790379 | 114822662 |
| chr1 | 114794016 | 114794145 |
| chr1 | 114804364 | 114804557 |
| chr1 | 114805684 | 114805887 |
| chr1 | 114818270 | 114818407 |
| chr1 | 114827544 | 114827646 |
| chr1 | 114836322 | 114837503 |
| chr1 | 114840135 | 114842845 |
| chr1 | 114853311 | 114855201 |
| chr1 | 114862847 | 114901871 |
| chr1 | 114996525 | 114996633 |
| chr1 | 115057079 | 115057584 |
| chr1 | 115061246 | 115061508 |
| chr1 | 115079290 | 115079496 |
| chr1 | 115210645 | 115238196 |
| chr1 | 115220589 | 115220702 |
| chr1 | 115231480 | 115231751 |
| chr1 | 115233421 | 115233652 |
| chr1 | 115300395 | 115301011 |
| chr1 | 115337756 | 115338450 |
| chr1 | 115375628 | 115376397 |
| chr1 | 115397070 | 115398406 |
| chr1 | 115434914 | 115435054 |
| chr1 | 115439217 | 115440083 |
| chr1 | 115441508 | 115441555 |
| chr1 | 115444792 | 115445149 |
| chr1 | 115498333 | 115499626 |
| chr1 | 115511528 | 115512502 |
| chr1 | 115512162 | 115512285 |
| chr1 | 115513297 | 115513866 |
| chr1 | 115545020 | 115545240 |
| chr1 | 115565180 | 115565308 |
| chr1 | 115570873 | 115571089 |
| chr1 | 115578353 | 115579239 |
| chr1 | 115583346 | 115584598 |
| chr1 | 115594964 | 115595156 |
| chr1 | 115598902 | 115600604 |
| chr1 | 115611286 | 115612909 |

|      |           |           |
|------|-----------|-----------|
| chr1 | 115613535 | 115614325 |
| chr1 | 115618078 | 115619567 |
| chr1 | 115624392 | 115625863 |
| chr1 | 115628502 | 115629486 |
| chr1 | 115630401 | 115634715 |
| chr1 | 115606100 | 115610858 |
| chr1 | 115667677 | 115668278 |
| chr1 | 115721698 | 115723058 |
| chr1 | 115722067 | 115722169 |
| chr1 | 115801374 | 115802087 |
| chr1 | 115819556 | 115820497 |
| chr1 | 115896724 | 115897730 |
| chr1 | 115898516 | 115899700 |
| chr1 | 115902480 | 115903592 |
| chr1 | 115999775 | 116000582 |
| chr1 | 116009710 | 116010756 |
| chr1 | 116037776 | 116038701 |
| chr1 | 116088381 | 116089362 |
| chr1 | 116150521 | 116151540 |
| chr1 | 116162784 | 116164201 |
| chr1 | 116151011 | 116151113 |
| chr1 | 116151515 | 116151540 |
| chr1 | 116183932 | 116184669 |
| chr1 | 116207653 | 116209303 |
| chr1 | 116210765 | 116212234 |
| chr1 | 116255273 | 116258430 |
| chr1 | 116269172 | 116270543 |
| chr1 | 116255787 | 116255921 |
| chr1 | 116257414 | 116257627 |
| chr1 | 116324860 | 116325689 |
| chr1 | 116349584 | 116350457 |
| chr1 | 116353077 | 116354633 |
| chr1 | 116372177 | 116372879 |
| chr1 | 116546192 | 116547389 |
| chr1 | 116652797 | 116654790 |
| chr1 | 116698381 | 116699914 |
| chr1 | 116744848 | 116746316 |
| chr1 | 116755149 | 116756107 |
| chr1 | 116698960 | 116699060 |
| chr1 | 116797694 | 116798761 |
| chr1 | 116802382 | 116803685 |
| chr1 | 116809471 | 116813415 |
| chr1 | 116818732 | 116819588 |

|      |                  |                  |
|------|------------------|------------------|
| chr1 | 116819815        | 116820393        |
| chr1 | 116816829        | 116818030        |
| chr1 | 116832019        | 116833861        |
| chr1 | 116841363        | 116842419        |
| chr1 | 116842163        | 116842417        |
| chr1 | 116849950        | 116850156        |
| chr1 | 116864297        | 116866468        |
| chr1 | 116870631        | 116873164        |
| chr1 | 116873998        | 116880968        |
| chr1 | 116881589        | 116882613        |
| chr1 | 116883711        | 116885380        |
| chr1 | 116886248        | 116887553        |
| chr1 | 116888693        | 116889559        |
| chr1 | 116889953        | 116892369        |
| chr1 | 116907253        | 116911624        |
| chr1 | 116914074        | 116923124        |
| chr1 | 116943272        | 116944255        |
| chr1 | 116945720        | 116946967        |
| chr1 | 116947456        | 116948870        |
| chr1 | 116959629        | 116961853        |
| chr1 | 116961050        | 116961257        |
| chr1 | 116974603        | 116976373        |
| chr1 | 117004704        | 117005504        |
| chr1 | 117007931        | 117010328        |
| chr1 | <b>117011901</b> | <b>117013497</b> |
| chr1 | 117024786        | 117027015        |
| chr1 | 117036257        | 117038007        |
| chr1 | 117058660        | 117060410        |
| chr1 | 117111874        | 117114472        |
| chr1 | 117210677        | 117210962        |
| chr1 | 117223435        | 117224121        |
| chr1 | 117250394        | 117251246        |
| chr1 | 117266947        | 117268003        |
| chr1 | 117281026        | 117281866        |
| chr1 | 117282760        | 117292547        |
| chr1 | 117276479        | 117277436        |
| chr1 | 117338624        | 117339492        |
| chr1 | 117359794        | 117360968        |
| chr1 | 117444463        | 117445501        |
| chr1 | 117452099        | 117454064        |
| chr1 | 117457772        | 117458937        |
| chr1 | 117694207        | 117694526        |
| chr1 | 117694727        | 117695746        |



|      |           |           |
|------|-----------|-----------|
| chr1 | 117752989 | 117754286 |
| chr1 | 117774435 | 117775244 |
| chr1 | 117810409 | 117810543 |
| chr1 | 117811308 | 117811909 |
| chr1 | 117838004 | 117838215 |
| chr1 | 118082954 | 118085134 |
| chr1 | 118083780 | 118083909 |
| chr1 | 118085009 | 118085134 |
| chr1 | 118097935 | 118098878 |
| chr1 | 118105102 | 118106384 |
| chr1 | 118107137 | 118108066 |
| chr1 | 118113121 | 118114826 |
| chr1 | 118116876 | 118117959 |
| chr1 | 118132839 | 118134663 |
| chr1 | 118148496 | 118150600 |
| chr1 | 118172242 | 118173187 |
| chr1 | 118196165 | 118198766 |
| chr1 | 118223820 | 118226889 |
| chr1 | 118240659 | 118241584 |
| chr1 | 118248817 | 118249658 |
| chr1 | 118261075 | 118261084 |
| chr1 | 118133438 | 118133541 |
| chr1 | 118133439 | 118133641 |
| chr1 | 118224482 | 118224683 |
| chr1 | 118301192 | 118301932 |
| chr1 | 118363903 | 118365350 |
| chr1 | 118727809 | 118727909 |
| chr1 | 120286040 | 120287608 |
| chr1 | 120310664 | 120311719 |
| chr1 | 120322418 | 120322788 |
| chr1 | 120335498 | 120336553 |
| chr1 | 121351231 | 121358810 |
| chr1 | 121351743 | 121352479 |
| chr1 | 121352873 | 121353314 |
| chr1 | 121354092 | 121355007 |
| chr1 | 121355501 | 121356312 |
| chr1 | 121370210 | 121370337 |
| chr1 | 121381935 | 121382610 |
| chr1 | 121381977 | 121382212 |
| chr1 | 121386196 | 121386421 |
| chr1 | 121478559 | 121478797 |
| chr1 | 121479732 | 121479897 |
| chr1 | 121480077 | 121480311 |

|      |                  |                  |
|------|------------------|------------------|
| chr1 | 121482594        | 121485597        |
| chr1 | 142535314        | 142539885        |
| chr1 | 144005022        | 144014970        |
| chr1 | 144015689        | 144016355        |
| chr1 | 144018742        | 144019277        |
| chr1 | 144527586        | 144527787        |
| chr1 | 144528070        | 144528997        |
| chr1 | 144529049        | 144529894        |
| chr1 | 144530548        | 144530758        |
| chr1 | 144531273        | 144531453        |
| chr1 | 144840468        | 144841453        |
| chr1 | 144840953        | 144841152        |
| chr1 | 144859216        | 144860592        |
| chr1 | <b>144874924</b> | <b>144877218</b> |
| chr1 | 144877466        | 144878396        |
| chr1 | 144879514        | 144881584        |
| chr1 | 144881847        | 144883567        |
| chr1 | 144884448        | 144888231        |
| chr1 | 144889669        | 144891589        |
| chr1 | 144895102        | 144896670        |
| chr1 | 144863840        | 144874012        |
| chr1 | 144859863        | 144859995        |
| chr1 | 144880755        | 144881187        |
| chr1 | 144881521        | 144881584        |
| chr1 | 144911882        | 144912594        |
| chr1 | 144915713        | 144918009        |
| chr1 | 144920728        | 144944599        |
| chr1 | 144945666        | 144949312        |
| chr1 | 144927884        | 144927991        |
| chr1 | 144929523        | 144929631        |
| chr1 | 144937635        | 144937765        |
| chr1 | 144985842        | 145049300        |
| chr1 | 145053676        | 145093170        |
| chr1 | 145095811        | 145118767        |
| chr1 | 145277151        | 145277293        |
| chr1 | 145289822        | 145290050        |
| chr1 | 145290188        | 145290415        |
| chr1 | 145290547        | 145290981        |
| chr1 | 145291300        | 145291518        |
| chr1 | 145291662        | 145292815        |
| chr1 | 145394179        | 145400093        |
| chr1 | 145417120        | 145418003        |
| chr1 | 145436601        | 145439660        |

|      |           |           |
|------|-----------|-----------|
| chr1 | 145442376 | 145443501 |
| chr1 | 145440228 | 145441718 |
| chr1 | 145448211 | 145450455 |
| chr1 | 145451170 | 145452533 |
| chr1 | 145454507 | 145455977 |
| chr1 | 145456255 | 145457726 |
| chr1 | 145471165 | 145472797 |
| chr1 | 145476639 | 145477134 |
| chr1 | 145515600 | 145516012 |
| chr1 | 145542147 | 145544374 |
| chr1 | 145556299 | 145556590 |
| chr1 | 145561189 | 145562673 |
| chr1 | 145573564 | 145577480 |
| chr1 | 145579932 | 145581146 |
| chr1 | 145717801 | 145718704 |
| chr1 | 145726335 | 145727128 |
| chr1 | 146542201 | 146544051 |
| chr1 | 146555860 | 146556784 |
| chr1 | 146568934 | 146570241 |
| chr1 | 146580830 | 146582730 |
| chr1 | 146591440 | 146592531 |
| chr1 | 146696427 | 146697411 |
| chr1 | 146806116 | 146806616 |
| chr1 | 146812230 | 146813294 |
| chr1 | 146936295 | 146939968 |
| chr1 | 146940302 | 146941291 |
| chr1 | 146942721 | 146943976 |
| chr1 | 146939676 | 146939968 |
| chr1 | 146940302 | 146940716 |
| chr1 | 146950267 | 146951232 |
| chr1 | 146972125 | 146972994 |
| chr1 | 146986146 | 146988430 |
| chr1 | 146999161 | 147000307 |
| chr1 | 147012323 | 147013077 |
| chr1 | 147018111 | 147018925 |
| chr1 | 147039128 | 147040154 |
| chr1 | 147070455 | 147071335 |
| chr1 | 147109298 | 147110465 |
| chr1 | 147141373 | 147141974 |
| chr1 | 147188693 | 147191916 |
| chr1 | 147193794 | 147194073 |
| chr1 | 147213386 | 147214850 |
| chr1 | 147219948 | 147220758 |

|      |           |           |
|------|-----------|-----------|
| chr1 | 147253101 | 147254742 |
| chr1 | 147259924 | 147261366 |
| chr1 | 147261875 | 147266010 |
| chr1 | 147210125 | 147211001 |
| chr1 | 147280705 | 147282202 |
| chr1 | 147344612 | 147344718 |
| chr1 | 147361478 | 147362474 |
| chr1 | 147364205 | 147365048 |
| chr1 | 147389118 | 147390190 |
| chr1 | 147735440 | 147736783 |
| chr1 | 147782439 | 147783760 |
| chr1 | 147788828 | 147789051 |
| chr1 | 147789291 | 147789394 |
| chr1 | 147800526 | 147801814 |
| chr1 | 147806400 | 147806579 |
| chr1 | 147806771 | 147806947 |
| chr1 | 147824047 | 147824165 |
| chr1 | 147824653 | 147824946 |
| chr1 | 148556621 | 148556926 |
| chr1 | 148850716 | 148851054 |
| chr1 | 148851281 | 148851583 |
| chr1 | 149034741 | 149035897 |
| chr1 | 149223174 | 149224058 |
| chr1 | 149224621 | 149224840 |
| chr1 | 149224950 | 149225161 |
| chr1 | 149684926 | 149685431 |
| chr1 | 149685000 | 149685153 |
| chr1 | 149865918 | 149866206 |
| chr1 | 149871206 | 149872829 |
| chr1 | 149874961 | 149875792 |
| chr1 | 149902142 | 149902266 |
| chr1 | 149903095 | 149904058 |
| chr1 | 150134317 | 150135093 |
| chr1 | 150140991 | 150142428 |
| chr1 | 150126182 | 150127407 |
| chr1 | 150227577 | 150229036 |
| chr1 | 150240587 | 150242120 |
| chr1 | 150228730 | 150229036 |
| chr1 | 150487426 | 150488752 |
| chr1 | 150504684 | 150505755 |
| chr1 | 150520885 | 150522299 |
| chr1 | 150523492 | 150524871 |
| chr1 | 150530208 | 150531119 |

|      |           |           |
|------|-----------|-----------|
| chr1 | 150533061 | 150535319 |
| chr1 | 150540162 | 150541487 |
| chr1 | 150547838 | 150548793 |
| chr1 | 150549310 | 150552866 |
| chr1 | 150523902 | 150524014 |
| chr1 | 150547838 | 150548793 |
| chr1 | 150549310 | 150552866 |
| chr1 | 150954169 | 150955151 |
| chr1 | 150980865 | 150982207 |
| chr1 | 151015578 | 151016558 |
| chr1 | 151019994 | 151023379 |
| chr1 | 151028770 | 151029705 |
| chr1 | 151030227 | 151033416 |
| chr1 | 151043259 | 151043470 |
| chr1 | 151106316 | 151107562 |
| chr1 | 151117166 | 151118115 |
| chr1 | 151128765 | 151129405 |
| chr1 | 151137845 | 151139326 |
| chr1 | 151162110 | 151162632 |
| chr1 | 151162117 | 151162227 |
| chr1 | 151246242 | 151246759 |
| chr1 | 151255163 | 151255819 |
| chr1 | 151282930 | 151284680 |
| chr1 | 151285922 | 151286864 |
| chr1 | 151318857 | 151320964 |
| chr1 | 151343657 | 151346745 |
| chr1 | 151347256 | 151348224 |
| chr1 | 151332970 | 151339160 |
| chr1 | 151483399 | 151483510 |
| chr1 | 151484922 | 151485830 |
| chr1 | 151486315 | 151487008 |
| chr1 | 151511608 | 151513982 |
| chr1 | 151518378 | 151522216 |
| chr1 | 151511882 | 151512312 |
| chr1 | 151519872 | 151520270 |
| chr1 | 151520240 | 151520341 |
| chr1 | 151541664 | 151543010 |
| chr1 | 151556811 | 151557835 |
| chr1 | 151568323 | 151569793 |
| chr1 | 151578996 | 151579839 |
| chr1 | 151665809 | 151666092 |
| chr1 | 151688544 | 151691610 |
| chr1 | 151695799 | 151697344 |

|      |           |           |
|------|-----------|-----------|
| chr1 | 151700598 | 151701485 |
| chr1 | 151701827 | 151703031 |
| chr1 | 151704581 | 151706706 |
| chr1 | 151706948 | 151708249 |
| chr1 | 151709102 | 151711238 |
| chr1 | 151711743 | 151713580 |
| chr1 | 151689413 | 151689514 |
| chr1 | 151691036 | 151691221 |
| chr1 | 151733358 | 151737101 |
| chr1 | 151755683 | 151756890 |
| chr1 | 151761977 | 151764636 |
| chr1 | 151768249 | 151770771 |
| chr1 | 151779933 | 151781119 |
| chr1 | 151791866 | 151793615 |
| chr1 | 151801933 | 151803926 |
| chr1 | 151804266 | 151805874 |
| chr1 | 151807803 | 151810130 |
| chr1 | 151811974 | 151812778 |
| chr1 | 151815256 | 151816289 |
| chr1 | 151820799 | 151822405 |
| chr1 | 151827836 | 151829187 |
| chr1 | 151831651 | 151832607 |
| chr1 | 151833278 | 151834516 |
| chr1 | 151829649 | 151831309 |
| chr1 | 151918679 | 151919736 |
| chr1 | 151922826 | 151923367 |
| chr1 | 151940622 | 151941025 |
| chr1 | 151974025 | 151974842 |
| chr1 | 151975227 | 151977238 |
| chr1 | 151960351 | 151972051 |
| chr1 | 151965083 | 151965616 |
| chr1 | 151986039 | 151986551 |
| chr1 | 151986310 | 151986556 |
| chr1 | 152001687 | 152001931 |
| chr1 | 152007387 | 152007565 |
| chr1 | 152009083 | 152009615 |
| chr1 | 152013109 | 152014249 |
| chr1 | 152015868 | 152016759 |
| chr1 | 152017076 | 152019321 |
| chr1 | 152019585 | 152024669 |
| chr1 | 152029727 | 152031059 |
| chr1 | 152032154 | 152034785 |
| chr1 | 152035850 | 152036957 |

|      |           |           |
|------|-----------|-----------|
| chr1 | 152039181 | 152040234 |
| chr1 | 152044592 | 152046306 |
| chr1 | 152047632 | 152050623 |
| chr1 | 152010541 | 152012796 |
| chr1 | 152041153 | 152044047 |
| chr1 | 152034595 | 152034726 |
| chr1 | 152039798 | 152039902 |
| chr1 | 152039913 | 152040020 |
| chr1 | 152059046 | 152060743 |
| chr1 | 152071272 | 152072741 |
| chr1 | 152087628 | 152090173 |
| chr1 | 152093472 | 152094978 |
| chr1 | 152103437 | 152107166 |
| chr1 | 152110268 | 152111235 |
| chr1 | 152112104 | 152113164 |
| chr1 | 152118100 | 152124225 |
| chr1 | 152125785 | 152127170 |
| chr1 | 152130444 | 152132117 |
| chr1 | 152143155 | 152144310 |
| chr1 | 152144789 | 152146269 |
| chr1 | 152148539 | 152149449 |
| chr1 | 152151772 | 152152907 |
| chr1 | 152158991 | 152159852 |
| chr1 | 152160985 | 152162176 |
| chr1 | 152163394 | 152164261 |
| chr1 | 152165979 | 152167947 |
| chr1 | 152075898 | 152086275 |
| chr1 | 152157455 | 152158403 |
| chr1 | 152087628 | 152090173 |
| chr1 | 152078782 | 152086275 |
| chr1 | 152193682 | 152195004 |
| chr1 | 152212928 | 152213942 |
| chr1 | 152325807 | 152327398 |
| chr1 | 152329342 | 152330192 |
| chr1 | 152343755 | 152344547 |
| chr1 | 152353178 | 152353883 |
| chr1 | 152359252 | 152362252 |
| chr1 | 152368191 | 152370244 |
| chr1 | 152379585 | 152380743 |
| chr1 | 152387666 | 152388765 |
| chr1 | 152389637 | 152391444 |
| chr1 | 152396408 | 152397511 |
| chr1 | 152398048 | 152399227 |

|      |           |           |
|------|-----------|-----------|
| chr1 | 152371124 | 152372044 |
| chr1 | 152359512 | 152359711 |
| chr1 | 152361563 | 152361680 |
| chr1 | 152361822 | 152361940 |
| chr1 | 152369942 | 152370060 |
| chr1 | 152371244 | 152371822 |
| chr1 | 152379585 | 152380743 |
| chr1 | 152387666 | 152388765 |
| chr1 | 152389637 | 152391444 |
| chr1 | 152396408 | 152397511 |
| chr1 | 152398048 | 152399227 |
| chr1 | 152380286 | 152380386 |
| chr1 | 152397451 | 152397511 |
| chr1 | 152398282 | 152398489 |
| chr1 | 152412863 | 152413845 |
| chr1 | 152413960 | 152413986 |
| chr1 | 152430381 | 152432059 |
| chr1 | 152432338 | 152433780 |
| chr1 | 152898467 | 152899223 |
| chr1 | 153095500 | 153095610 |
| chr1 | 153443513 | 153443515 |
| chr1 | 153445396 | 153445553 |
| chr1 | 153580429 | 153581841 |
| chr1 | 153893575 | 153893731 |
| chr1 | 153918262 | 153919829 |
| chr1 | 153936018 | 153936925 |
| chr1 | 153939073 | 153940406 |
| chr1 | 154288096 | 154290221 |
| chr1 | 154530766 | 154531502 |
| chr1 | 154972741 | 154974415 |
| chr1 | 155098021 | 155100504 |
| chr1 | 156440991 | 156442044 |
| chr1 | 156470113 | 156471444 |
| chr1 | 156716128 | 156717795 |
| chr1 | 158078761 | 158079564 |
| chr1 | 161052875 | 161054153 |
| chr1 | 161102268 | 161103277 |
| chr1 | 161102631 | 161103277 |
| chr1 | 163291328 | 163292328 |
| chr1 | 166808069 | 166809740 |
| chr1 | 168876567 | 168877138 |
| chr1 | 169074865 | 169077143 |
| chr1 | 169687041 | 169687043 |



|      |           |           |
|------|-----------|-----------|
| chr1 | 169862050 | 169863466 |
| chr1 | 171710617 | 171711598 |
| chr1 | 172614065 | 172615046 |
| chr1 | 172881510 | 172883069 |
| chr1 | 173174089 | 173174897 |
| chr1 | 173683315 | 173684544 |
| chr1 | 173683674 | 173684699 |
| chr1 | 173836721 | 173837155 |
| chr1 | 175081876 | 175083102 |
| chr1 | 175262826 | 175264266 |
| chr1 | 175496502 | 175497682 |
| chr1 | 175879351 | 175881478 |
| chr1 | 175896538 | 175898068 |
| chr1 | 177270531 | 177271546 |
| chr1 | 177538572 | 177539320 |
| chr1 | 177542725 | 177544140 |
| chr1 | 177725871 | 177726827 |
| chr1 | 177841729 | 177842749 |
| chr1 | 177860307 | 177861660 |
| chr1 | 178737723 | 178738674 |
| chr1 | 179050333 | 179051690 |
| chr1 | 179050685 | 179051035 |
| chr1 | 179697384 | 179698221 |
| chr1 | 179740802 | 179741631 |
| chr1 | 180915059 | 180917768 |
| chr1 | 180919091 | 180920095 |
| chr1 | 180922299 | 180923457 |
| chr1 | 180928358 | 180929579 |
| chr1 | 181080830 | 181082476 |
| chr1 | 181085792 | 181089288 |
| chr1 | 181089752 | 181090645 |
| chr1 | 181103681 | 181104572 |
| chr1 | 181112181 | 181113249 |
| chr1 | 181118093 | 181118908 |
| chr1 | 181125996 | 181126923 |
| chr1 | 181131339 | 181133745 |
| chr1 | 181139435 | 181140922 |
| chr1 | 181057062 | 181059840 |
| chr1 | 181073193 | 181076094 |
| chr1 | 181141137 | 181143457 |
| chr1 | 181207260 | 181207354 |
| chr1 | 181223895 | 181225280 |
| chr1 | 181253222 | 181255097 |

|      |           |           |
|------|-----------|-----------|
| chr1 | 181255833 | 181260406 |
| chr1 | 181272448 | 181273441 |
| chr1 | 181347356 | 181349178 |
| chr1 | 181352055 | 181353081 |
| chr1 | 181355529 | 181356372 |
| chr1 | 181359468 | 181360352 |
| chr1 | 181361616 | 181362812 |
| chr1 | 181372895 | 181375161 |
| chr1 | 181387894 | 181389565 |
| chr1 | 181425401 | 181427347 |
| chr1 | 181435749 | 181437139 |
| chr1 | 181468654 | 181470808 |
| chr1 | 182572199 | 182573215 |
| chr1 | 182629431 | 182630299 |
| chr1 | 182572628 | 182572748 |
| chr1 | 183062631 | 183063572 |
| chr1 | 183064720 | 183065604 |
| chr1 | 183069475 | 183070352 |
| chr1 | 183072568 | 183073488 |
| chr1 | 183203585 | 183204928 |
| chr1 | 183250197 | 183251008 |
| chr1 | 183440565 | 183441273 |
| chr1 | 183752324 | 183753229 |
| chr1 | 183773971 | 183774783 |
| chr1 | 183773971 | 183774783 |
| chr1 | 184258534 | 184261633 |
| chr1 | 184263147 | 184264149 |
| chr1 | 184254353 | 184257074 |
| chr1 | 184254518 | 184254731 |
| chr1 | 184256407 | 184256614 |
| chr1 | 184355381 | 184357818 |
| chr1 | 184592377 | 184593556 |
| chr1 | 184617601 | 184619017 |
| chr1 | 184943337 | 184944326 |
| chr1 | 185286615 | 185287025 |
| chr1 | 186162422 | 186164307 |
| chr1 | 188150722 | 188152891 |
| chr1 | 196505013 | 196505122 |
| chr1 | 198182627 | 198183065 |
| chr1 | 198798881 | 198799748 |
| chr1 | 200007902 | 200009519 |
| chr1 | 200007902 | 200009519 |
| chr1 | 200120001 | 200120526 |

|      |           |           |
|------|-----------|-----------|
| chr1 | 200152779 | 200153984 |
| chr1 | 200392388 | 200392496 |
| chr1 | 200827655 | 200828729 |
| chr1 | 200829425 | 200830229 |
| chr1 | 200861670 | 200862838 |
| chr1 | 200876657 | 200878496 |
| chr1 | 200888087 | 200889035 |
| chr1 | 200939131 | 200940121 |
| chr1 | 200976828 | 200978002 |
| chr1 | 200984866 | 200986017 |
| chr1 | 201007915 | 201008735 |
| chr1 | 201067506 | 201068259 |
| chr1 | 201082687 | 201084472 |
| chr1 | 201085455 | 201086404 |
| chr1 | 201094908 | 201096921 |
| chr1 | 201139013 | 201141161 |
| chr1 | 201142527 | 201143356 |
| chr1 | 201153137 | 201154042 |
| chr1 | 201190206 | 201191122 |
| chr1 | 201191409 | 201192426 |
| chr1 | 201228589 | 201229497 |
| chr1 | 201231001 | 201232471 |
| chr1 | 201238008 | 201238758 |
| chr1 | 201251075 | 201252994 |
| chr1 | 201254524 | 201255786 |
| chr1 | 201349643 | 201350946 |
| chr1 | 201368108 | 201369411 |
| chr1 | 201404561 | 201405638 |
| chr1 | 201429193 | 201431500 |
| chr1 | 201436672 | 201439468 |
| chr1 | 201451042 | 201452198 |
| chr1 | 201462151 | 201463144 |
| chr1 | 201486488 | 201487716 |
| chr1 | 201499442 | 201500859 |
| chr1 | 201502657 | 201503514 |
| chr1 | 201551621 | 201552951 |
| chr1 | 201563124 | 201566096 |
| chr1 | 201566456 | 201567754 |
| chr1 | 201580127 | 201581264 |
| chr1 | 201614663 | 201615633 |
| chr1 | 201617862 | 201620081 |
| chr1 | 201662818 | 201663568 |
| chr1 | 201708105 | 201709589 |

|      |           |           |
|------|-----------|-----------|
| chr1 | 201721882 | 201723553 |
| chr1 | 201986500 | 201988763 |
| chr1 | 201991292 | 201993134 |
| chr1 | 202003406 | 202004616 |
| chr1 | 202014860 | 202017634 |
| chr1 | 202025603 | 202026899 |
| chr1 | 202027156 | 202028350 |
| chr1 | 202053642 | 202056845 |
| chr1 | 202078292 | 202079426 |
| chr1 | 202081958 | 202083208 |
| chr1 | 202100980 | 202102837 |
| chr1 | 202103713 | 202104660 |
| chr1 | 202168799 | 202170933 |
| chr1 | 202184959 | 202185868 |
| chr1 | 202204379 | 202205965 |
| chr1 | 202221291 | 202222408 |
| chr1 | 202237581 | 202238611 |
| chr1 | 202269091 | 202270037 |
| chr1 | 202278206 | 202279139 |
| chr1 | 202348968 | 202349737 |
| chr1 | 200915694 | 200917731 |
| chr1 | 201243777 | 201245144 |
| chr1 | 201276342 | 201279306 |
| chr1 | 201424236 | 201425426 |
| chr1 | 201505927 | 201508979 |
| chr1 | 201997980 | 201998904 |
| chr1 | 202112897 | 202114010 |
| chr1 | 202244024 | 202246193 |
| chr1 | 201085924 | 201086100 |
| chr1 | 201551825 | 201552063 |
| chr1 | 202104612 | 202104660 |
| chr1 | 202537891 | 202538763 |
| chr1 | 202553408 | 202554116 |
| chr1 | 202556428 | 202557492 |
| chr1 | 202573311 | 202574180 |
| chr1 | 202614520 | 202615244 |
| chr1 | 202622965 | 202623684 |
| chr1 | 202661737 | 202663734 |
| chr1 | 202614520 | 202615244 |
| chr1 | 202614520 | 202614621 |
| chr1 | 202615180 | 202615244 |
| chr1 | 202662211 | 202662383 |
| chr1 | 202662480 | 202662603 |

|      |           |           |
|------|-----------|-----------|
| chr1 | 202780981 | 202782152 |
| chr1 | 202829567 | 202830554 |
| chr1 | 202957918 | 202958431 |
| chr1 | 202968474 | 202968772 |
| chr1 | 202995001 | 202995839 |
| chr1 | 202999677 | 203000655 |
| chr1 | 203015996 | 203017037 |
| chr1 | 203050894 | 203051709 |
| chr1 | 203063829 | 203064842 |
| chr1 | 203065276 | 203066737 |
| chr1 | 203096391 | 203097830 |
| chr1 | 203098122 | 203099651 |
| chr1 | 203166121 | 203167068 |
| chr1 | 203188621 | 203189819 |
| chr1 | 203201566 | 203206467 |
| chr1 | 203241751 | 203243189 |
| chr1 | 203249683 | 203251008 |
| chr1 | 203263914 | 203265183 |
| chr1 | 203269317 | 203270296 |
| chr1 | 203279168 | 203280045 |
| chr1 | 203285209 | 203287300 |
| chr1 | 203296038 | 203298063 |
| chr1 | 203273654 | 203276317 |
| chr1 | 203377761 | 203377872 |
| chr1 | 203378045 | 203378449 |
| chr1 | 203380042 | 203380161 |
| chr1 | 203449453 | 203450519 |
| chr1 | 203471398 | 203472239 |
| chr1 | 203473600 | 203474426 |
| chr1 | 203485183 | 203486996 |
| chr1 | 203553290 | 203554251 |
| chr1 | 203562284 | 203563372 |
| chr1 | 203613507 | 203614458 |
| chr1 | 203641415 | 203642334 |
| chr1 | 203662224 | 203663267 |
| chr1 | 204041818 | 204043226 |
| chr1 | 204043500 | 204044785 |
| chr1 | 204071304 | 204074670 |
| chr1 | 204099708 | 204101046 |
| chr1 | 204113582 | 204114671 |
| chr1 | 204117621 | 204118871 |
| chr1 | 204138437 | 204139828 |
| chr1 | 204140540 | 204141605 |

|      |           |           |
|------|-----------|-----------|
| chr1 | 204148858 | 204150025 |
| chr1 | 204151936 | 204152713 |
| chr1 | 204182635 | 204184043 |
| chr1 | 204184657 | 204185477 |
| chr1 | 204195137 | 204196395 |
| chr1 | 204222817 | 204223609 |
| chr1 | 204224440 | 204225284 |
| chr1 | 204254648 | 204257885 |
| chr1 | 204269778 | 204271369 |
| chr1 | 204273800 | 204274653 |
| chr1 | 204275940 | 204277554 |
| chr1 | 204322483 | 204323347 |
| chr1 | 204331445 | 204333374 |
| chr1 | 204346859 | 204348794 |
| chr1 | 204349273 | 204350677 |
| chr1 | 204308436 | 204309274 |
| chr1 | 204255002 | 204255208 |
| chr1 | 204255102 | 204255223 |
| chr1 | 204255507 | 204255614 |
| chr1 | 204346986 | 204347114 |
| chr1 | 204347570 | 204347796 |
| chr1 | 204401314 | 204402265 |
| chr1 | 204407390 | 204408246 |
| chr1 | 204411952 | 204413254 |
| chr1 | 204407951 | 204408053 |
| chr1 | 204448448 | 204449506 |
| chr1 | 204462623 | 204464860 |
| chr1 | 204533778 | 204536006 |
| chr1 | 204541763 | 204543666 |
| chr1 | 204560448 | 204562008 |
| chr1 | 204567260 | 204568302 |
| chr1 | 204578484 | 204579403 |
| chr1 | 204592099 | 204593166 |
| chr1 | 204615959 | 204617574 |
| chr1 | 204653798 | 204655442 |
| chr1 | 204688844 | 204689665 |
| chr1 | 204694404 | 204695084 |
| chr1 | 204705251 | 204707080 |
| chr1 | 204709118 | 204710078 |
| chr1 | 204720283 | 204721648 |
| chr1 | 204752252 | 204753148 |
| chr1 | 204767744 | 204768602 |
| chr1 | 204775768 | 204777115 |

|      |           |           |
|------|-----------|-----------|
| chr1 | 204810411 | 204811367 |
| chr1 | 204815543 | 204816351 |
| chr1 | 204865956 | 204866793 |
| chr1 | 204916198 | 204917090 |
| chr1 | 204918303 | 204919312 |
| chr1 | 204925308 | 204926507 |
| chr1 | 204958373 | 204959531 |
| chr1 | 204972735 | 204973550 |
| chr1 | 204983509 | 204984353 |
| chr1 | 204989243 | 204990360 |
| chr1 | 205021545 | 205022729 |
| chr1 | 205012369 | 205014207 |
| chr1 | 205090654 | 205091384 |
| chr1 | 205180370 | 205181567 |
| chr1 | 205286056 | 205289148 |
| chr1 | 205290121 | 205291412 |
| chr1 | 205298969 | 205300133 |
| chr1 | 205304274 | 205305878 |
| chr1 | 205342820 | 205343707 |
| chr1 | 205307443 | 205308412 |
| chr1 | 205290279 | 205290445 |
| chr1 | 205421558 | 205422458 |
| chr1 | 205422873 | 205423614 |
| chr1 | 205424181 | 205425236 |
| chr1 | 205425829 | 205427233 |
| chr1 | 205427457 | 205428794 |
| chr1 | 205443329 | 205445841 |
| chr1 | 205446472 | 205447243 |
| chr1 | 205462096 | 205463503 |
| chr1 | 205472875 | 205475410 |
| chr1 | 205485008 | 205485818 |
| chr1 | 205486377 | 205487270 |
| chr1 | 205510149 | 205511595 |
| chr1 | 205454889 | 205455746 |
| chr1 | 205421558 | 205422458 |
| chr1 | 205422873 | 205423614 |
| chr1 | 205424181 | 205425236 |
| chr1 | 205425829 | 205427233 |
| chr1 | 205427457 | 205428794 |
| chr1 | 205534507 | 205535483 |
| chr1 | 205540268 | 205541085 |
| chr1 | 205544204 | 205545095 |
| chr1 | 205560597 | 205561605 |

|      |           |           |
|------|-----------|-----------|
| chr1 | 205600260 | 205601914 |
| chr1 | 205632977 | 205634362 |
| chr1 | 205645564 | 205646640 |
| chr1 | 205684050 | 205685064 |
| chr1 | 205779252 | 205780189 |
| chr1 | 205780944 | 205782959 |
| chr1 | 205849010 | 205849298 |
| chr1 | 205866876 | 205867390 |
| chr1 | 205882104 | 205883739 |
| chr1 | 206217979 | 206219012 |
| chr1 | 206219263 | 206221255 |
| chr1 | 206231853 | 206232707 |
| chr1 | 206263444 | 206264215 |
| chr1 | 206278017 | 206278811 |
| chr1 | 206278169 | 206278271 |
| chr1 | 206595949 | 206597072 |
| chr1 | 206676867 | 206677801 |
| chr1 | 206679579 | 206683051 |
| chr1 | 206686740 | 206687616 |
| chr1 | 206711404 | 206712208 |
| chr1 | 206731386 | 206732330 |
| chr1 | 206759648 | 206761629 |
| chr1 | 206785002 | 206786528 |
| chr1 | 206807089 | 206808539 |
| chr1 | 206841907 | 206842825 |
| chr1 | 206860774 | 206861690 |
| chr1 | 206887066 | 206888864 |
| chr1 | 206919145 | 206919983 |
| chr1 | 206923066 | 206924015 |
| chr1 | 206951039 | 206951969 |
| chr1 | 206984762 | 206986843 |
| chr1 | 207013085 | 207013878 |
| chr1 | 207039536 | 207040484 |
| chr1 | 207041190 | 207042094 |
| chr1 | 207050340 | 207052957 |
| chr1 | 207068387 | 207069713 |
| chr1 | 207074819 | 207076182 |
| chr1 | 207082168 | 207083312 |
| chr1 | 207089370 | 207090197 |
| chr1 | 207128869 | 207129617 |
| chr1 | 207197773 | 207199298 |
| chr1 | 207206057 | 207206958 |
| chr1 | 207225857 | 207226902 |



|      |           |           |
|------|-----------|-----------|
| chr1 | 207301481 | 207303433 |
| chr1 | 207325052 | 207326131 |
| chr1 | 206676884 | 206677153 |
| chr1 | 206677409 | 206677621 |
| chr1 | 206842000 | 206842114 |
| chr1 | 207458064 | 207458916 |
| chr1 | 207489136 | 207490540 |
| chr1 | 207536626 | 207537397 |
| chr1 | 207670905 | 207671921 |
| chr1 | 214870409 | 214870810 |
| chr1 | 214938223 | 214938732 |
| chr1 | 215024145 | 215024241 |
| chr1 | 215130824 | 215131093 |
| chr1 | 215175035 | 215175242 |
| chr1 | 215246310 | 215247064 |
| chr1 | 215253058 | 215254789 |
| chr1 | 215355693 | 215355826 |
| chr1 | 215418445 | 215419673 |
| chr1 | 215421640 | 215422428 |
| chr1 | 215547938 | 215548222 |
| chr1 | 215650006 | 215650132 |
| chr1 | 215691085 | 215691195 |
| chr1 | 215716670 | 215716814 |
| chr1 | 216773617 | 216775098 |
| chr1 | 216794901 | 216795959 |
| chr1 | 216882949 | 216884295 |
| chr1 | 216884604 | 216885492 |
| chr1 | 216901982 | 216902795 |
| chr1 | 216938364 | 216940541 |
| chr1 | 216959695 | 216960818 |
| chr1 | 216987062 | 216988462 |
| chr1 | 216995497 | 216996540 |
| chr1 | 216774793 | 216775024 |
| chr1 | 216794901 | 216795549 |
| chr1 | 217078577 | 217079588 |
| chr1 | 217093708 | 217094735 |
| chr1 | 217097119 | 217098280 |
| chr1 | 217140750 | 217141818 |
| chr1 | 217181647 | 217182492 |
| chr1 | 217211656 | 217214543 |
| chr1 | 217291560 | 217295997 |
| chr1 | 217297087 | 217299921 |
| chr1 | 217302464 | 217303667 |

|      |           |           |
|------|-----------|-----------|
| chr1 | 217321599 | 217323965 |
| chr1 | 217346748 | 217347630 |
| chr1 | 217357272 | 217358349 |
| chr1 | 217359424 | 217360879 |
| chr1 | 217361445 | 217363132 |
| chr1 | 217367451 | 217368291 |
| chr1 | 217389767 | 217390652 |
| chr1 | 217202123 | 217205743 |
| chr1 | 217294241 | 217294463 |
| chr1 | 217413518 | 217414487 |
| chr1 | 217417093 | 217418280 |
| chr1 | 217414874 | 217415982 |
| chr1 | 217484784 | 217486750 |
| chr1 | 217487438 | 217490213 |
| chr1 | 217505069 | 217505292 |
| chr1 | 217505180 | 217505314 |
| chr1 | 218104918 | 218105930 |
| chr1 | 218449817 | 218450255 |
| chr1 | 218458083 | 218458386 |
| chr1 | 218667815 | 218668097 |
| chr1 | 218945690 | 218946870 |
| chr1 | 219477280 | 219477570 |
| chr1 | 219522483 | 219522897 |
| chr1 | 219565669 | 219567329 |
| chr1 | 219566525 | 219566745 |
| chr1 | 219598742 | 219599653 |
| chr1 | 219680385 | 219680415 |
| chr1 | 219701627 | 219703001 |
| chr1 | 219703954 | 219705232 |
| chr1 | 219709821 | 219711128 |
| chr1 | 219716077 | 219716886 |
| chr1 | 219733851 | 219734815 |
| chr1 | 219742669 | 219743531 |
| chr1 | 219702677 | 219702914 |
| chr1 | 219716521 | 219716755 |
| chr1 | 219734065 | 219734188 |
| chr1 | 222942429 | 222942531 |
| chr1 | 224041412 | 224041940 |
| chr1 | 224200524 | 224201620 |
| chr1 | 224826320 | 224827256 |
| chr1 | 224946511 | 224947313 |
| chr1 | 226497324 | 226497546 |
| chr1 | 226844474 | 226845175 |

|       |           |           |
|-------|-----------|-----------|
| chr1  | 227908912 | 227909981 |
| chr1  | 228218723 | 228219716 |
| chr1  | 228281812 | 228283184 |
| chr1  | 228305632 | 228306627 |
| chr1  | 228386222 | 228387647 |
| chr1  | 228531689 | 228533172 |
| chr1  | 228832996 | 228833792 |
| chr1  | 229019015 | 229019968 |
| chr1  | 229153607 | 229154546 |
| chr1  | 229265806 | 229266669 |
| chr1  | 229945465 | 229946766 |
| chr1  | 230559810 | 230560810 |
| chr1  | 230559810 | 230560810 |
| chr1  | 231019936 | 231021254 |
| chr1  | 231020612 | 231020734 |
| chr1  | 231297997 | 231299008 |
| chr1  | 231751911 | 231752715 |
| chr1  | 232067084 | 232068415 |
| chr1  | 232492457 | 232493294 |
| chr1  | 234916277 | 234919003 |
| chr1  | 234912120 | 234916005 |
| chr1  | 234916277 | 234919003 |
| chr1  | 234912120 | 234916005 |
| chr1  | 235752631 | 235753140 |
| chr1  | 236260483 | 236260793 |
| chr1  | 239389475 | 239389511 |
| chr1  | 249168399 | 249168645 |
| chr10 | 1778519   | 1779290   |
| chr10 | 5113336   | 5113642   |
| chr10 | 5432926   | 5435120   |
| chr10 | 5508381   | 5509150   |
| chr10 | 5529602   | 5532008   |
| chr10 | 5533047   | 5536363   |
| chr10 | 5538023   | 5539390   |
| chr10 | 5543424   | 5546389   |
| chr10 | 5588302   | 5590913   |
| chr10 | 5621344   | 5622063   |
| chr10 | 5630477   | 5632506   |
| chr10 | 5651359   | 5652374   |
| chr10 | 5664678   | 5665968   |
| chr10 | 5553569   | 5554427   |
| chr10 | 5582577   | 5587823   |
| chr10 | 6127960   | 6129182   |

|       |          |          |
|-------|----------|----------|
| chr10 | 6424807  | 6425810  |
| chr10 | 6443258  | 6444337  |
| chr10 | 6420404  | 6423357  |
| chr10 | 7450304  | 7451301  |
| chr10 | 8086973  | 8088234  |
| chr10 | 8094302  | 8097310  |
| chr10 | 13553741 | 13554536 |
| chr10 | 13628338 | 13629584 |
| chr10 | 13632821 | 13633872 |
| chr10 | 13630846 | 13632163 |
| chr10 | 16756540 | 16757059 |
| chr10 | 23385588 | 23385672 |
| chr10 | 23860279 | 23861665 |
| chr10 | 24527210 | 24528033 |
| chr10 | 29133452 | 29134288 |
| chr10 | 29228351 | 29229084 |
| chr10 | 30025665 | 30026562 |
| chr10 | 30272132 | 30272245 |
| chr10 | 31832176 | 31833309 |
| chr10 | 31832754 | 31833321 |
| chr10 | 31913240 | 31914784 |
| chr10 | 31991715 | 31992828 |
| chr10 | 33654530 | 33656038 |
| chr10 | 33655196 | 33655337 |
| chr10 | 35733475 | 35734217 |
| chr10 | 38773917 | 38777120 |
| chr10 | 38788881 | 38789909 |
| chr10 | 38797709 | 38799554 |
| chr10 | 38805934 | 38806999 |
| chr10 | 38815492 | 38818997 |
| chr10 | 38774331 | 38774636 |
| chr10 | 38775816 | 38776791 |
| chr10 | 38789382 | 38789619 |
| chr10 | 38805934 | 38806052 |
| chr10 | 38806193 | 38806999 |
| chr10 | 38871443 | 38872769 |
| chr10 | 38873376 | 38874331 |
| chr10 | 38871443 | 38872769 |
| chr10 | 38873376 | 38874331 |
| chr10 | 38876738 | 38877899 |
| chr10 | 38880306 | 38882716 |
| chr10 | 38871443 | 38871510 |
| chr10 | 38872034 | 38872285 |

|       |          |          |
|-------|----------|----------|
| chr10 | 39111199 | 39112301 |
| chr10 | 39137459 | 39138769 |
| chr10 | 39143730 | 39144984 |
| chr10 | 42354802 | 42363308 |
| chr10 | 42363940 | 42365944 |
| chr10 | 42403770 | 42405746 |
| chr10 | 42406028 | 42409806 |
| chr10 | 42432439 | 42433449 |
| chr10 | 42368710 | 42370197 |
| chr10 | 42373616 | 42403104 |
| chr10 | 42526770 | 42528320 |
| chr10 | 42528635 | 42533270 |
| chr10 | 42534688 | 42534871 |
| chr10 | 42535378 | 42535440 |
| chr10 | 42538974 | 42539224 |
| chr10 | 42539623 | 42539774 |
| chr10 | 42596533 | 42600797 |
| chr10 | 42796765 | 42797571 |
| chr10 | 43266520 | 43268470 |
| chr10 | 43277481 | 43278604 |
| chr10 | 43521400 | 43522626 |
| chr10 | 44068655 | 44069907 |
| chr10 | 44101226 | 44101740 |
| chr10 | 44141433 | 44141548 |
| chr10 | 46966686 | 46967817 |
| chr10 | 46968788 | 46969619 |
| chr10 | 46980359 | 46981370 |
| chr10 | 46983185 | 46984587 |
| chr10 | 46987756 | 46988938 |
| chr10 | 46995472 | 46996412 |
| chr10 | 47011897 | 47013033 |
| chr10 | 47030496 | 47031557 |
| chr10 | 47031913 | 47033325 |
| chr10 | 47056445 | 47057953 |
| chr10 | 47077428 | 47078620 |
| chr10 | 47083590 | 47084952 |
| chr10 | 47085495 | 47086720 |
| chr10 | 47097832 | 47098954 |
| chr10 | 47111745 | 47112686 |
| chr10 | 47112941 | 47113774 |
| chr10 | 47114719 | 47116027 |
| chr10 | 47130123 | 47130933 |
| chr10 | 47141535 | 47144549 |

|       |           |           |
|-------|-----------|-----------|
| chr10 | 47037313  | 47038785  |
| chr10 | 47070439  | 47071784  |
| chr10 | 49495610  | 49496802  |
| chr10 | 50894297  | 50895448  |
| chr10 | 64224141  | 64226075  |
| chr10 | 65471419  | 65472610  |
| chr10 | 65748594  | 65749474  |
| chr10 | 71309755  | 71310803  |
| chr10 | 72408208  | 72408431  |
| chr10 | 72409518  | 72410076  |
| chr10 | 73099400  | 73100467  |
| chr10 | 73706135  | 73707397  |
| chr10 | 74090856  | 74091904  |
| chr10 | 74114186  | 74115321  |
| chr10 | 77814768  | 77817251  |
| chr10 | 79616535  | 79617437  |
| chr10 | 79709191  | 79709809  |
| chr10 | 80732323  | 80733277  |
| chr10 | 80828754  | 80830124  |
| chr10 | 82414376  | 82416585  |
| chr10 | 89264576  | 89265355  |
| chr10 | 89621270  | 89621476  |
| chr10 | 92856653  | 92857687  |
| chr10 | 93315973  | 93316776  |
| chr10 | 93668281  | 93669332  |
| chr10 | 94652450  | 94652595  |
| chr10 | 95225749  | 95226867  |
| chr10 | 95462348  | 95462581  |
| chr10 | 97802846  | 97803716  |
| chr10 | 97850177  | 97850392  |
| chr10 | 102241211 | 102241989 |
| chr10 | 102756911 | 102758423 |
| chr10 | 102827040 | 102828118 |
| chr10 | 103085648 | 103086592 |
| chr10 | 103947650 | 103948905 |
| chr10 | 103963738 | 103964322 |
| chr10 | 104180175 | 104181864 |
| chr10 | 104383515 | 104384767 |
| chr10 | 105210646 | 105211834 |
| chr10 | 105512131 | 105513042 |
| chr10 | 105911812 | 105912290 |
| chr10 | 105993369 | 105993583 |
| chr10 | 106064548 | 106065342 |

|       |           |           |
|-------|-----------|-----------|
| chr10 | 110544149 | 110545158 |
| chr10 | 114606614 | 114608388 |
| chr10 | 114623759 | 114624798 |
| chr10 | 115239291 | 115239560 |
| chr10 | 115452527 | 115452771 |
| chr10 | 115954567 | 115954803 |
| chr10 | 116186723 | 116187700 |
| chr10 | 118765005 | 118765210 |
| chr10 | 120368295 | 120368519 |
| chr10 | 121423141 | 121424329 |
| chr10 | 122747854 | 122749586 |
| chr10 | 125503001 | 125503864 |
| chr10 | 125851819 | 125852581 |
| chr10 | 127011719 | 127012760 |
| chr10 | 127642185 | 127642937 |
| chr10 | 131908503 | 131908512 |
| chr10 | 133864764 | 133867397 |
| chr10 | 134030407 | 134030736 |
| chr10 | 134261111 | 134262032 |
| chr11 | 1128282   | 1129385   |
| chr11 | 2667801   | 2668611   |
| chr11 | 2675045   | 2676512   |
| chr11 | 2681090   | 2682781   |
| chr11 | 2670224   | 2673079   |
| chr11 | 13855440  | 13856467  |
| chr11 | 17391617  | 17394605  |
| chr11 | 27312745  | 27313375  |
| chr11 | 35412903  | 35413417  |
| chr11 | 35640495  | 35641364  |
| chr11 | 45906448  | 45907455  |
| chr11 | 46260218  | 46261030  |
| chr11 | 46260218  | 46260325  |
| chr11 | 46957916  | 46958845  |
| chr11 | 47200709  | 47201465  |
| chr11 | 47236897  | 47237147  |
| chr11 | 47269975  | 47270923  |
| chr11 | 47270580  | 47270787  |
| chr11 | 47290374  | 47290749  |
| chr11 | 47428355  | 47430536  |
| chr11 | 47968243  | 47969348  |
| chr11 | 47968733  | 47969336  |
| chr11 | 48854722  | 48854955  |
| chr11 | 48898160  | 48898392  |

|       |          |          |
|-------|----------|----------|
| chr11 | 50522355 | 50522590 |
| chr11 | 50723045 | 50723185 |
| chr11 | 50724822 | 50724891 |
| chr11 | 50724822 | 50724840 |
| chr11 | 50759906 | 50760012 |
| chr11 | 51569045 | 51569220 |
| chr11 | 51569586 | 51569929 |
| chr11 | 51569983 | 51570228 |
| chr11 | 51572029 | 51572271 |
| chr11 | 51572597 | 51572833 |
| chr11 | 51573071 | 51573190 |
| chr11 | 51573250 | 51573545 |
| chr11 | 51574105 | 51574305 |
| chr11 | 51574205 | 51574325 |
| chr11 | 51576887 | 51577123 |
| chr11 | 51577621 | 51577861 |
| chr11 | 51578667 | 51578974 |
| chr11 | 51579355 | 51579739 |
| chr11 | 51582971 | 51583107 |
| chr11 | 51583357 | 51583571 |
| chr11 | 51584039 | 51584163 |
| chr11 | 51591149 | 51591453 |
| chr11 | 51591471 | 51591571 |
| chr11 | 51591941 | 51592171 |
| chr11 | 59936241 | 59937679 |
| chr11 | 60021892 | 60022565 |
| chr11 | 60925682 | 60926966 |
| chr11 | 61100170 | 61101023 |
| chr11 | 61334202 | 61335620 |
| chr11 | 61348659 | 61349479 |
| chr11 | 61353922 | 61354699 |
| chr11 | 61276084 | 61277265 |
| chr11 | 61467243 | 61468023 |
| chr11 | 62358605 | 62359816 |
| chr11 | 62368464 | 62369279 |
| chr11 | 62572619 | 62572806 |
| chr11 | 62608998 | 62609330 |
| chr11 | 62622142 | 62623456 |
| chr11 | 62761647 | 62762555 |
| chr11 | 64007344 | 64008522 |
| chr11 | 64644708 | 64645519 |
| chr11 | 65150148 | 65150944 |
| chr11 | 65211638 | 65212847 |



|       |          |          |
|-------|----------|----------|
| chr11 | 65189342 | 65192007 |
| chr11 | 65254920 | 65256107 |
| chr11 | 65337172 | 65338078 |
| chr11 | 65554586 | 65555410 |
| chr11 | 65555956 | 65556759 |
| chr11 | 65618285 | 65619472 |
| chr11 | 65627680 | 65628546 |
| chr11 | 65655234 | 65656925 |
| chr11 | 65657258 | 65659042 |
| chr11 | 65686142 | 65687374 |
| chr11 | 65768823 | 65770557 |
| chr11 | 65779722 | 65781021 |
| chr11 | 66024136 | 66025316 |
| chr11 | 66188058 | 66190018 |
| chr11 | 66206445 | 66206501 |
| chr11 | 66246174 | 66246695 |
| chr11 | 66313238 | 66314329 |
| chr11 | 66494251 | 66495206 |
| chr11 | 66498228 | 66499675 |
| chr11 | 66485547 | 66488655 |
| chr11 | 66494577 | 66494897 |
| chr11 | 66627011 | 66627866 |
| chr11 | 66616717 | 66617566 |
| chr11 | 66647944 | 66649215 |
| chr11 | 66788835 | 66789377 |
| chr11 | 66788842 | 66790091 |
| chr11 | 66790438 | 66791871 |
| chr11 | 66794865 | 66796985 |
| chr11 | 66798112 | 66799600 |
| chr11 | 66801037 | 66801203 |
| chr11 | 67007333 | 67007451 |
| chr11 | 67033321 | 67034308 |
| chr11 | 67070539 | 67072029 |
| chr11 | 67084574 | 67085993 |
| chr11 | 67113112 | 67114342 |
| chr11 | 67179599 | 67180386 |
| chr11 | 67290151 | 67290985 |
| chr11 | 67369915 | 67370785 |
| chr11 | 67370162 | 67370785 |
| chr11 | 67400153 | 67401130 |
| chr11 | 67412784 | 67413749 |
| chr11 | 67422856 | 67424570 |
| chr11 | 67441678 | 67442960 |

|       |          |          |
|-------|----------|----------|
| chr11 | 67769674 | 67770724 |
| chr11 | 67785642 | 67787280 |
| chr11 | 68463538 | 68464720 |
| chr11 | 68606316 | 68607054 |
| chr11 | 68882239 | 68883384 |
| chr11 | 68889843 | 68890979 |
| chr11 | 68913201 | 68914655 |
| chr11 | 68964979 | 68965788 |
| chr11 | 69011034 | 69011962 |
| chr11 | 69045275 | 69046615 |
| chr11 | 69061695 | 69062517 |
| chr11 | 69064682 | 69065431 |
| chr11 | 69046395 | 69046615 |
| chr11 | 69327732 | 69328579 |
| chr11 | 69338512 | 69340708 |
| chr11 | 69287870 | 69289226 |
| chr11 | 69468973 | 69470341 |
| chr11 | 69450672 | 69451973 |
| chr11 | 69639521 | 69640329 |
| chr11 | 69665854 | 69666989 |
| chr11 | 69795945 | 69796998 |
| chr11 | 69883519 | 69886792 |
| chr11 | 69887986 | 69890014 |
| chr11 | 69913721 | 69914569 |
| chr11 | 70078861 | 70080279 |
| chr11 | 70357987 | 70358529 |
| chr11 | 70606681 | 70608575 |
| chr11 | 70652129 | 70652592 |
| chr11 | 70964134 | 70964513 |
| chr11 | 71009959 | 71010922 |
| chr11 | 72217847 | 72220006 |
| chr11 | 72378059 | 72379301 |
| chr11 | 72496900 | 72497722 |
| chr11 | 72504374 | 72505694 |
| chr11 | 72893488 | 72894617 |
| chr11 | 72904584 | 72906381 |
| chr11 | 72980311 | 72981478 |
| chr11 | 72982831 | 72983911 |
| chr11 | 72986253 | 72987236 |
| chr11 | 73037821 | 73038632 |
| chr11 | 73687595 | 73689434 |
| chr11 | 73971590 | 73972333 |
| chr11 | 74160117 | 74161162 |

|       |           |           |
|-------|-----------|-----------|
| chr11 | 74250093  | 74252115  |
| chr11 | 74254059  | 74256010  |
| chr11 | 74581290  | 74581794  |
| chr11 | 74728572  | 74729706  |
| chr11 | 74910343  | 74911191  |
| chr11 | 75047326  | 75048988  |
| chr11 | 75050601  | 75052196  |
| chr11 | 75061757  | 75063015  |
| chr11 | 75053437  | 75055347  |
| chr11 | 75083339  | 75083919  |
| chr11 | 75111136  | 75111365  |
| chr11 | 75132706  | 75134379  |
| chr11 | 75272874  | 75273822  |
| chr11 | 75300288  | 75301155  |
| chr11 | 75479180  | 75480088  |
| chr11 | 75946365  | 75947436  |
| chr11 | 75960540  | 75962196  |
| chr11 | 75989901  | 75990761  |
| chr11 | 76155441  | 76155530  |
| chr11 | 76483304  | 76484216  |
| chr11 | 76486390  | 76488957  |
| chr11 | 76499033  | 76500670  |
| chr11 | 76524404  | 76526294  |
| chr11 | 76766878  | 76768887  |
| chr11 | 76799546  | 76800527  |
| chr11 | 77185641  | 77185808  |
| chr11 | 78770546  | 78771822  |
| chr11 | 78930356  | 78931176  |
| chr11 | 79958655  | 79959776  |
| chr11 | 83012675  | 83013633  |
| chr11 | 84881648  | 84881864  |
| chr11 | 85475021  | 85475805  |
| chr11 | 85555247  | 85556168  |
| chr11 | 85655868  | 85657212  |
| chr11 | 86180866  | 86181670  |
| chr11 | 86210278  | 86211500  |
| chr11 | 86262391  | 86262637  |
| chr11 | 86340683  | 86341552  |
| chr11 | 86501442  | 86502506  |
| chr11 | 115678507 | 115680022 |
| chr11 | 117250750 | 117251501 |
| chr11 | 117413154 | 117414827 |
| chr11 | 117415763 | 117416857 |

|       |           |           |
|-------|-----------|-----------|
| chr11 | 117459981 | 117461454 |
| chr11 | 117490966 | 117492875 |
| chr11 | 117562103 | 117562949 |
| chr11 | 117688067 | 117689572 |
| chr11 | 117703471 | 117704999 |
| chr11 | 117757725 | 117759234 |
| chr11 | 117799657 | 117800653 |
| chr11 | 117856215 | 117857699 |
| chr11 | 117887944 | 117889084 |
| chr11 | 117924104 | 117924892 |
| chr11 | 117927878 | 117929059 |
| chr11 | 117954579 | 117955654 |
| chr11 | 117956423 | 117959201 |
| chr11 | 117962146 | 117963050 |
| chr11 | 118015886 | 118016790 |
| chr11 | 118027412 | 118028298 |
| chr11 | 118089343 | 118090225 |
| chr11 | 118121933 | 118122844 |
| chr11 | 117931160 | 117932315 |
| chr11 | 117491346 | 117491454 |
| chr11 | 118401271 | 118402503 |
| chr11 | 118478113 | 118479333 |
| chr11 | 118740318 | 118742017 |
| chr11 | 118758028 | 118758981 |
| chr11 | 118787114 | 118789650 |
| chr11 | 118791494 | 118793506 |
| chr11 | 118794482 | 118796206 |
| chr11 | 118866741 | 118868855 |
| chr11 | 118898761 | 118899680 |
| chr11 | 118921136 | 118922083 |
| chr11 | 118965173 | 118966848 |
| chr11 | 118972083 | 118973487 |
| chr11 | 118978538 | 118980149 |
| chr11 | 119039102 | 119039939 |
| chr11 | 119231552 | 119232703 |
| chr11 | 119305499 | 119306483 |
| chr11 | 119954425 | 119955217 |
| chr11 | 119956091 | 119957526 |
| chr11 | 118779730 | 118784759 |
| chr11 | 118798303 | 118800509 |
| chr11 | 119305684 | 119305904 |
| chr11 | 120488856 | 120489845 |
| chr11 | 125423915 | 125424460 |

|       |          |          |
|-------|----------|----------|
| chr12 | 162624   | 167303   |
| chr12 | 1530096  | 1531147  |
| chr12 | 2179176  | 2180333  |
| chr12 | 15400767 | 15401263 |
| chr12 | 15942714 | 15942821 |
| chr12 | 32075718 | 32075966 |
| chr12 | 33740962 | 33741945 |
| chr12 | 33764022 | 33764254 |
| chr12 | 34645469 | 34645702 |
| chr12 | 34833354 | 34833600 |
| chr12 | 34837542 | 34837788 |
| chr12 | 34838848 | 34839086 |
| chr12 | 34841023 | 34841165 |
| chr12 | 34841356 | 34841705 |
| chr12 | 34842103 | 34842245 |
| chr12 | 34844995 | 34845186 |
| chr12 | 34846200 | 34846581 |
| chr12 | 34846812 | 34847046 |
| chr12 | 34847379 | 34847745 |
| chr12 | 34847405 | 34847845 |
| chr12 | 34847970 | 34848237 |
| chr12 | 34848321 | 34848562 |
| chr12 | 34849832 | 34850066 |
| chr12 | 34850821 | 34851061 |
| chr12 | 34851415 | 34851653 |
| chr12 | 34852632 | 34852852 |
| chr12 | 34855254 | 34855490 |
| chr12 | 38002269 | 38002371 |
| chr12 | 38008623 | 38008762 |
| chr12 | 38009252 | 38009486 |
| chr12 | 38027738 | 38027764 |
| chr12 | 38028996 | 38029235 |
| chr12 | 38222821 | 38226732 |
| chr12 | 38234522 | 38234757 |
| chr12 | 38331803 | 38332014 |
| chr12 | 38450043 | 38450137 |
| chr12 | 39837346 | 39837530 |
| chr12 | 44870974 | 44871496 |
| chr12 | 45342631 | 45342740 |
| chr12 | 46478776 | 46479853 |
| chr12 | 46480408 | 46481346 |
| chr12 | 46589892 | 46590399 |
| chr12 | 46849539 | 46850141 |

|       |          |          |
|-------|----------|----------|
| chr12 | 46900749 | 46900913 |
| chr12 | 47790840 | 47791056 |
| chr12 | 48005719 | 48008093 |
| chr12 | 48110894 | 48111763 |
| chr12 | 49208338 | 49209277 |
| chr12 | 49453821 | 49454839 |
| chr12 | 49690064 | 49691625 |
| chr12 | 49742348 | 49743296 |
| chr12 | 49740888 | 49741882 |
| chr12 | 49742348 | 49743296 |
| chr12 | 49740888 | 49741882 |
| chr12 | 50035657 | 50036595 |
| chr12 | 50287266 | 50288385 |
| chr12 | 50356628 | 50357460 |
| chr12 | 50360639 | 50361584 |
| chr12 | 50503020 | 50504112 |
| chr12 | 50478406 | 50479604 |
| chr12 | 51664227 | 51664575 |
| chr12 | 51987112 | 51988115 |
| chr12 | 52337594 | 52338449 |
| chr12 | 52463077 | 52464160 |
| chr12 | 52513231 | 52514126 |
| chr12 | 52542175 | 52543149 |
| chr12 | 52610708 | 52612042 |
| chr12 | 52637239 | 52638629 |
| chr12 | 52640621 | 52641969 |
| chr12 | 52737955 | 52739084 |
| chr12 | 52766069 | 52767043 |
| chr12 | 53059785 | 53060524 |
| chr12 | 53152576 | 53156844 |
| chr12 | 53194099 | 53194923 |
| chr12 | 53250303 | 53251595 |
| chr12 | 53262383 | 53263576 |
| chr12 | 53273091 | 53274263 |
| chr12 | 53280433 | 53280988 |
| chr12 | 53289719 | 53290232 |
| chr12 | 53294986 | 53295239 |
| chr12 | 53300444 | 53302051 |
| chr12 | 53320313 | 53320516 |
| chr12 | 53320413 | 53320523 |
| chr12 | 53338898 | 53340214 |
| chr12 | 53343329 | 53343934 |
| chr12 | 53343329 | 53344424 |

|       |          |          |
|-------|----------|----------|
| chr12 | 53345256 | 53345639 |
| chr12 | 53440086 | 53442932 |
| chr12 | 53447121 | 53448412 |
| chr12 | 53454572 | 53456243 |
| chr12 | 53461322 | 53462304 |
| chr12 | 53472617 | 53474013 |
| chr12 | 53447538 | 53447644 |
| chr12 | 53491892 | 53492039 |
| chr12 | 53574106 | 53575116 |
| chr12 | 53614468 | 53617066 |
| chr12 | 53617268 | 53618135 |
| chr12 | 53692723 | 53693833 |
| chr12 | 53715019 | 53716123 |
| chr12 | 53715505 | 53715711 |
| chr12 | 54069637 | 54069848 |
| chr12 | 54070152 | 54070371 |
| chr12 | 54218723 | 54219598 |
| chr12 | 54197605 | 54198997 |
| chr12 | 54260868 | 54262067 |
| chr12 | 54331413 | 54333049 |
| chr12 | 54411206 | 54412386 |
| chr12 | 54608402 | 54609329 |
| chr12 | 56009991 | 56011605 |
| chr12 | 56223900 | 56225102 |
| chr12 | 56435674 | 56435939 |
| chr12 | 56545141 | 56546845 |
| chr12 | 56651181 | 56651529 |
| chr12 | 57082394 | 57082965 |
| chr12 | 57199085 | 57199970 |
| chr12 | 57293570 | 57295530 |
| chr12 | 57305251 | 57305752 |
| chr12 | 57323791 | 57324614 |
| chr12 | 57481583 | 57482478 |
| chr12 | 57855983 | 57857014 |
| chr12 | 58130582 | 58132111 |
| chr12 | 58153861 | 58155280 |
| chr12 | 58165596 | 58167171 |
| chr12 | 58130582 | 58132111 |
| chr12 | 58238449 | 58241068 |
| chr12 | 58461062 | 58461747 |
| chr12 | 58911597 | 58913042 |
| chr12 | 62828688 | 62829823 |
| chr12 | 63069578 | 63072398 |

|       |          |          |
|-------|----------|----------|
| chr12 | 63263491 | 63264687 |
| chr12 | 63327068 | 63329493 |
| chr12 | 63327068 | 63329493 |
| chr12 | 63350534 | 63351848 |
| chr12 | 63351696 | 63351848 |
| chr12 | 63545396 | 63546742 |
| chr12 | 63599761 | 63600572 |
| chr12 | 63794105 | 63795446 |
| chr12 | 63800923 | 63801681 |
| chr12 | 63798343 | 63799400 |
| chr12 | 64238363 | 64239025 |
| chr12 | 65003557 | 65003765 |
| chr12 | 65173990 | 65176353 |
| chr12 | 65214185 | 65215208 |
| chr12 | 65217796 | 65219714 |
| chr12 | 65215104 | 65215208 |
| chr12 | 65217796 | 65219714 |
| chr12 | 65283032 | 65284572 |
| chr12 | 65392235 | 65393050 |
| chr12 | 65413732 | 65414743 |
| chr12 | 65933434 | 65935277 |
| chr12 | 67884192 | 67884614 |
| chr12 | 67988786 | 67989633 |
| chr12 | 68121191 | 68121981 |
| chr12 | 69300472 | 69301355 |
| chr12 | 69550954 | 69551081 |
| chr12 | 69833377 | 69834731 |
| chr12 | 70161593 | 70162725 |
| chr12 | 70161823 | 70162027 |
| chr12 | 70402232 | 70402606 |
| chr12 | 71714491 | 71714654 |
| chr12 | 71813973 | 71815322 |
| chr12 | 71832088 | 71832998 |
| chr12 | 72403538 | 72404625 |
| chr12 | 75252904 | 75253019 |
| chr12 | 75625592 | 75625733 |
| chr12 | 75904759 | 75905837 |
| chr12 | 76424069 | 76424506 |
| chr12 | 77272844 | 77273937 |
| chr12 | 80085287 | 80085406 |
| chr12 | 83079588 | 83079797 |
| chr12 | 83080097 | 83080331 |
| chr12 | 83081375 | 83081799 |



|       |           |           |
|-------|-----------|-----------|
| chr12 | 89745737  | 89747159  |
| chr12 | 90162933  | 90164415  |
| chr12 | 92936954  | 92937953  |
| chr12 | 92993474  | 92994291  |
| chr12 | 93957536  | 93958428  |
| chr12 | 95205827  | 95206485  |
| chr12 | 98140040  | 98140854  |
| chr12 | 98340747  | 98342621  |
| chr12 | 98350619  | 98351611  |
| chr12 | 101801251 | 101802301 |
| chr12 | 102271605 | 102271649 |
| chr12 | 103968710 | 103969501 |
| chr12 | 104322877 | 104322951 |
| chr12 | 104350302 | 104351212 |
| chr12 | 104577229 | 104578797 |
| chr12 | 104628964 | 104629079 |
| chr12 | 105928396 | 105929630 |
| chr12 | 106264431 | 106265067 |
| chr12 | 106682324 | 106683426 |
| chr12 | 106682820 | 106682920 |
| chr12 | 107014492 | 107015803 |
| chr12 | 107167781 | 107168588 |
| chr12 | 108079029 | 108080223 |
| chr12 | 110283554 | 110283779 |
| chr12 | 111741830 | 111743309 |
| chr12 | 113144295 | 113145131 |
| chr12 | 113199369 | 113200312 |
| chr12 | 113365045 | 113365965 |
| chr12 | 113440532 | 113441705 |
| chr12 | 113494280 | 113495074 |
| chr12 | 113683431 | 113685195 |
| chr12 | 113987007 | 113987820 |
| chr12 | 114062852 | 114064120 |
| chr12 | 115121757 | 115122743 |
| chr12 | 116828159 | 116829276 |
| chr12 | 116975820 | 116976735 |
| chr12 | 118406649 | 118407527 |
| chr12 | 118490724 | 118490863 |
| chr12 | 120517581 | 120517969 |
| chr12 | 120528779 | 120529034 |
| chr12 | 120666435 | 120667497 |
| chr12 | 120668702 | 120670473 |
| chr12 | 121078504 | 121079406 |

|       |           |           |
|-------|-----------|-----------|
| chr12 | 121123965 | 121125141 |
| chr12 | 122370590 | 122371111 |
| chr12 | 122582103 | 122583770 |
| chr12 | 122907610 | 122908354 |
| chr12 | 124086659 | 124087154 |
| chr12 | 124627018 | 124628147 |
| chr12 | 124853236 | 124854038 |
| chr12 | 125121707 | 125122739 |
| chr12 | 125248458 | 125250168 |
| chr12 | 125423928 | 125425899 |
| chr12 | 125424406 | 125424528 |
| chr12 | 125424628 | 125424729 |
| chr12 | 125545313 | 125546646 |
| chr12 | 125886991 | 125887863 |
| chr12 | 125549984 | 125550841 |
| chr12 | 126554329 | 126555083 |
| chr12 | 126554416 | 126554522 |
| chr12 | 130491898 | 130492720 |
| chr12 | 132194896 | 132195142 |
| chr12 | 132314643 | 132315502 |
| chr12 | 132344942 | 132346022 |
| chr12 | 132356599 | 132356645 |
| chr12 | 132674151 | 132675054 |
| chr12 | 132904895 | 132905839 |
| chr12 | 132906270 | 132907046 |
| chr12 | 133031118 | 133032190 |
| chr12 | 133038709 | 133039629 |
| chr12 | 133055422 | 133056740 |
| chr12 | 133038759 | 133038962 |
| chr12 | 133082872 | 133083429 |
| chr12 | 133095387 | 133097732 |
| chr12 | 133100174 | 133101435 |
| chr12 | 133780846 | 133780950 |
| chr12 | 133796301 | 133796411 |
| chr13 | 20693330  | 20693469  |
| chr13 | 20701810  | 20703302  |
| chr13 | 20735349  | 20736286  |
| chr13 | 20975596  | 20976553  |
| chr13 | 20856682  | 20861772  |
| chr13 | 21074807  | 21075012  |
| chr13 | 24258111  | 24259751  |
| chr13 | 24620520  | 24621707  |
| chr13 | 24705505  | 24706593  |

|       |          |          |
|-------|----------|----------|
| chr13 | 25085208 | 25086069 |
| chr13 | 26084817 | 26086132 |
| chr13 | 27010579 | 27011989 |
| chr13 | 27197713 | 27198031 |
| chr13 | 27436907 | 27437679 |
| chr13 | 28188264 | 28189394 |
| chr13 | 28194494 | 28195737 |
| chr13 | 30424097 | 30424841 |
| chr13 | 30632044 | 30633555 |
| chr13 | 30633843 | 30634651 |
| chr13 | 30645952 | 30646937 |
| chr13 | 30658946 | 30660154 |
| chr13 | 30688633 | 30689749 |
| chr13 | 30968943 | 30969909 |
| chr13 | 31191041 | 31192394 |
| chr13 | 31773893 | 31774951 |
| chr13 | 31928439 | 31929986 |
| chr13 | 31939234 | 31941161 |
| chr13 | 32384060 | 32385545 |
| chr13 | 34208798 | 34209088 |
| chr13 | 34216320 | 34217614 |
| chr13 | 34661490 | 34662712 |
| chr13 | 37001971 | 37002887 |
| chr13 | 37340771 | 37341660 |
| chr13 | 39861611 | 39862378 |
| chr13 | 41344839 | 41345936 |
| chr13 | 41885792 | 41886554 |
| chr13 | 41886131 | 41886532 |
| chr13 | 43019091 | 43021574 |
| chr13 | 43597394 | 43598119 |
| chr13 | 45707665 | 45708601 |
| chr13 | 46626047 | 46627496 |
| chr13 | 46708834 | 46710058 |
| chr13 | 46734388 | 46735242 |
| chr13 | 46693954 | 46695505 |
| chr13 | 46927815 | 46929587 |
| chr13 | 46928906 | 46929112 |
| chr13 | 47058172 | 47059656 |
| chr13 | 47125479 | 47127682 |
| chr13 | 47132731 | 47133541 |
| chr13 | 47134880 | 47136464 |
| chr13 | 47136853 | 47137608 |
| chr13 | 47140231 | 47141596 |

|       |           |           |
|-------|-----------|-----------|
| chr13 | 47144398  | 47145506  |
| chr13 | 47119930  | 47121336  |
| chr13 | 47167752  | 47168664  |
| chr13 | 47267843  | 47268955  |
| chr13 | 47370235  | 47372419  |
| chr13 | 47390509  | 47391376  |
| chr13 | 47441633  | 47442837  |
| chr13 | 47467102  | 47468455  |
| chr13 | 47441776  | 47442040  |
| chr13 | 47533384  | 47534248  |
| chr13 | 47548770  | 47550198  |
| chr13 | 47747459  | 47748259  |
| chr13 | 47753016  | 47754007  |
| chr13 | 47753284  | 47753717  |
| chr13 | 49125063  | 49126055  |
| chr13 | 49289707  | 49290985  |
| chr13 | 49354422  | 49355584  |
| chr13 | 52644939  | 52644979  |
| chr13 | 97619712  | 97621384  |
| chr13 | 109633422 | 109634167 |
| chr13 | 114042787 | 114043898 |
| chr13 | 114248705 | 114250268 |
| chr13 | 114251278 | 114252531 |
| chr13 | 114299035 | 114300011 |
| chr14 | 19000682  | 19000979  |
| chr14 | 19000728  | 19001281  |
| chr14 | 19001900  | 19003845  |
| chr14 | 19008836  | 19010530  |
| chr14 | 19011301  | 19014289  |
| chr14 | 19018269  | 19019136  |
| chr14 | 19022576  | 19023726  |
| chr14 | 19034871  | 19037577  |
| chr14 | 19038374  | 19041275  |
| chr14 | 19041932  | 19043269  |
| chr14 | 19044015  | 19045332  |
| chr14 | 19013298  | 19013534  |
| chr14 | 19013694  | 19013931  |
| chr14 | 19018993  | 19019136  |
| chr14 | 19038374  | 19038559  |
| chr14 | 19044485  | 19044722  |
| chr14 | 20938207  | 20939237  |
| chr14 | 21149041  | 21149944  |
| chr14 | 21220278  | 21221436  |

|       |          |          |
|-------|----------|----------|
| chr14 | 21150972 | 21152320 |
| chr14 | 21149301 | 21149407 |
| chr14 | 21149703 | 21149827 |
| chr14 | 21316845 | 21317653 |
| chr14 | 21571541 | 21572949 |
| chr14 | 22794758 | 22795956 |
| chr14 | 22811844 | 22814042 |
| chr14 | 23305756 | 23306642 |
| chr14 | 23339994 | 23341488 |
| chr14 | 23503355 | 23504095 |
| chr14 | 23770522 | 23771329 |
| chr14 | 23807891 | 23809830 |
| chr14 | 24092507 | 24095366 |
| chr14 | 24163203 | 24164551 |
| chr14 | 24171938 | 24175379 |
| chr14 | 24175681 | 24177891 |
| chr14 | 24178163 | 24179332 |
| chr14 | 24299130 | 24300127 |
| chr14 | 24317843 | 24320745 |
| chr14 | 24582636 | 24584373 |
| chr14 | 24657642 | 24658759 |
| chr14 | 24835330 | 24837189 |
| chr14 | 24739724 | 24741399 |
| chr14 | 31738996 | 31740367 |
| chr14 | 32442866 | 32444946 |
| chr14 | 32439792 | 32440733 |
| chr14 | 32545393 | 32545897 |
| chr14 | 32545674 | 32545908 |
| chr14 | 32723788 | 32724640 |
| chr14 | 32728447 | 32729267 |
| chr14 | 32732637 | 32734125 |
| chr14 | 32728785 | 32729090 |
| chr14 | 32732637 | 32732821 |
| chr14 | 34249865 | 34251842 |
| chr14 | 34318145 | 34318663 |
| chr14 | 34351016 | 34352055 |
| chr14 | 34509393 | 34510263 |
| chr14 | 34606969 | 34608337 |
| chr14 | 34672143 | 34673379 |
| chr14 | 34800850 | 34802131 |
| chr14 | 34837769 | 34838604 |
| chr14 | 34889794 | 34890672 |
| chr14 | 35343162 | 35344182 |

|       |          |          |
|-------|----------|----------|
| chr14 | 35591350 | 35591993 |
| chr14 | 35805564 | 35806868 |
| chr14 | 35805688 | 35805953 |
| chr14 | 35839293 | 35841085 |
| chr14 | 35843270 | 35844317 |
| chr14 | 35872380 | 35874828 |
| chr14 | 35927754 | 35928447 |
| chr14 | 35927806 | 35928447 |
| chr14 | 37324889 | 37326092 |
| chr14 | 37327010 | 37327972 |
| chr14 | 37640983 | 37641925 |
| chr14 | 38044850 | 38044966 |
| chr14 | 38051916 | 38058889 |
| chr14 | 38068179 | 38069780 |
| chr14 | 38070026 | 38071354 |
| chr14 | 38059477 | 38067383 |
| chr14 | 42579897 | 42581818 |
| chr14 | 43397115 | 43397462 |
| chr14 | 49916246 | 49917454 |
| chr14 | 49945382 | 49946885 |
| chr14 | 50234971 | 50235149 |
| chr14 | 50319460 | 50320326 |
| chr14 | 50328316 | 50329332 |
| chr14 | 50467122 | 50470696 |
| chr14 | 50486722 | 50488192 |
| chr14 | 50777988 | 50778717 |
| chr14 | 50798319 | 50799035 |
| chr14 | 51437120 | 51438111 |
| chr14 | 52000851 | 52002259 |
| chr14 | 52455706 | 52456790 |
| chr14 | 52714831 | 52715688 |
| chr14 | 52726757 | 52727577 |
| chr14 | 52788190 | 52789307 |
| chr14 | 52839779 | 52840071 |
| chr14 | 52864179 | 52865260 |
| chr14 | 53258815 | 53258908 |
| chr14 | 53618514 | 53619304 |
| chr14 | 53692668 | 53692698 |
| chr14 | 53740350 | 53741024 |
| chr14 | 54560928 | 54561257 |
| chr14 | 54955962 | 54956118 |
| chr14 | 55239528 | 55240798 |
| chr14 | 55289678 | 55292432 |

|       |          |          |
|-------|----------|----------|
| chr14 | 55368322 | 55368884 |
| chr14 | 55570677 | 55570758 |
| chr14 | 55588375 | 55589854 |
| chr14 | 55878116 | 55878939 |
| chr14 | 55934560 | 55936054 |
| chr14 | 56023740 | 56024611 |
| chr14 | 56256133 | 56257003 |
| chr14 | 57221771 | 57222776 |
| chr14 | 57856661 | 57856866 |
| chr14 | 58529141 | 58530085 |
| chr14 | 58765103 | 58765516 |
| chr14 | 58862232 | 58863316 |
| chr14 | 59104567 | 59105533 |
| chr14 | 59104567 | 59105533 |
| chr14 | 59655398 | 59656846 |
| chr14 | 59656196 | 59656401 |
| chr14 | 60558157 | 60559017 |
| chr14 | 60631010 | 60632591 |
| chr14 | 61113600 | 61115728 |
| chr14 | 61123329 | 61124987 |
| chr14 | 61580406 | 61582548 |
| chr14 | 61610347 | 61611630 |
| chr14 | 61640905 | 61642038 |
| chr14 | 61746688 | 61748790 |
| chr14 | 61641406 | 61641510 |
| chr14 | 61787350 | 61788356 |
| chr14 | 61822388 | 61823421 |
| chr14 | 61822582 | 61822786 |
| chr14 | 61840480 | 61842293 |
| chr14 | 61905273 | 61906508 |
| chr14 | 61929179 | 61930375 |
| chr14 | 61951458 | 61952635 |
| chr14 | 61954893 | 61955820 |
| chr14 | 61981237 | 61982792 |
| chr14 | 61991779 | 61994489 |
| chr14 | 61997398 | 61998240 |
| chr14 | 62006117 | 62007151 |
| chr14 | 62019273 | 62020816 |
| chr14 | 62025707 | 62028487 |
| chr14 | 62058686 | 62059511 |
| chr14 | 62029252 | 62030664 |
| chr14 | 62029760 | 62029993 |
| chr14 | 62129239 | 62129478 |

|       |          |          |
|-------|----------|----------|
| chr14 | 62162407 | 62163317 |
| chr14 | 62164806 | 62165721 |
| chr14 | 62165553 | 62165721 |
| chr14 | 62315153 | 62315348 |
| chr14 | 62580801 | 62581686 |
| chr14 | 62581123 | 62581686 |
| chr14 | 64108433 | 64108999 |
| chr14 | 64194910 | 64195282 |
| chr14 | 64319057 | 64319574 |
| chr14 | 64804216 | 64806070 |
| chr14 | 64807328 | 64808420 |
| chr14 | 64968017 | 64969821 |
| chr14 | 65006141 | 65006272 |
| chr14 | 65006637 | 65008226 |
| chr14 | 65226400 | 65227383 |
| chr14 | 65426985 | 65428263 |
| chr14 | 65453196 | 65453979 |
| chr14 | 65536683 | 65537869 |
| chr14 | 65688972 | 65689920 |
| chr14 | 65693194 | 65694414 |
| chr14 | 65694941 | 65696296 |
| chr14 | 65721633 | 65722398 |
| chr14 | 65722587 | 65723155 |
| chr14 | 65819313 | 65820265 |
| chr14 | 66273520 | 66277363 |
| chr14 | 66282706 | 66283999 |
| chr14 | 66466239 | 66467252 |
| chr14 | 66469711 | 66470773 |
| chr14 | 66783833 | 66785311 |
| chr14 | 67411494 | 67411725 |
| chr14 | 67653473 | 67653817 |
| chr14 | 67654397 | 67654536 |
| chr14 | 67684503 | 67684760 |
| chr14 | 67707238 | 67707438 |
| chr14 | 67707591 | 67707702 |
| chr14 | 67908929 | 67909784 |
| chr14 | 67959464 | 67961191 |
| chr14 | 68494412 | 68495553 |
| chr14 | 68677117 | 68678377 |
| chr14 | 68772935 | 68773527 |
| chr14 | 68925467 | 68926402 |
| chr14 | 68935404 | 68937007 |
| chr14 | 68996923 | 68998134 |



|       |          |          |
|-------|----------|----------|
| chr14 | 69082181 | 69085591 |
| chr14 | 69135495 | 69136424 |
| chr14 | 69180416 | 69181267 |
| chr14 | 69223875 | 69224900 |
| chr14 | 69241385 | 69242670 |
| chr14 | 69259779 | 69261340 |
| chr14 | 69261929 | 69263281 |
| chr14 | 69282886 | 69283710 |
| chr14 | 69320152 | 69321310 |
| chr14 | 69331710 | 69333177 |
| chr14 | 69392349 | 69393729 |
| chr14 | 69444434 | 69445410 |
| chr14 | 69455209 | 69456411 |
| chr14 | 69620593 | 69620865 |
| chr14 | 69658078 | 69658279 |
| chr14 | 69788167 | 69789328 |
| chr14 | 69823516 | 69824619 |
| chr14 | 69865003 | 69865965 |
| chr14 | 70109642 | 70110956 |
| chr14 | 70107090 | 70108483 |
| chr14 | 70343163 | 70343975 |
| chr14 | 70465434 | 70466509 |
| chr14 | 70479603 | 70480447 |
| chr14 | 70825863 | 70826762 |
| chr14 | 70883555 | 70883770 |
| chr14 | 70901500 | 70905794 |
| chr14 | 70907143 | 70908559 |
| chr14 | 70908866 | 70912411 |
| chr14 | 70986486 | 70987998 |
| chr14 | 71131561 | 71132838 |
| chr14 | 71303616 | 71304419 |
| chr14 | 71438954 | 71439792 |
| chr14 | 71616767 | 71618545 |
| chr14 | 71770815 | 71772754 |
| chr14 | 71786654 | 71788088 |
| chr14 | 72214012 | 72216560 |
| chr14 | 72722245 | 72723413 |
| chr14 | 72870923 | 72871738 |
| chr14 | 72956874 | 72957798 |
| chr14 | 73242660 | 73243377 |
| chr14 | 73992732 | 73993964 |
| chr14 | 74079388 | 74080217 |
| chr14 | 74207102 | 74208558 |

|       |          |          |
|-------|----------|----------|
| chr14 | 74222919 | 74224006 |
| chr14 | 74224283 | 74227458 |
| chr14 | 74251122 | 74254180 |
| chr14 | 74227368 | 74227458 |
| chr14 | 74920504 | 74921667 |
| chr14 | 75078919 | 75079768 |
| chr14 | 75109404 | 75110394 |
| chr14 | 74921529 | 74921667 |
| chr14 | 75348049 | 75349256 |
| chr14 | 75412057 | 75413300 |
| chr14 | 75549946 | 75550395 |
| chr14 | 75725095 | 75725877 |
| chr14 | 75831710 | 75832495 |
| chr14 | 75976904 | 75978432 |
| chr14 | 76057235 | 76060891 |
| chr14 | 76072987 | 76077770 |
| chr14 | 76100656 | 76101923 |
| chr14 | 76177269 | 76178906 |
| chr14 | 76448012 | 76449105 |
| chr14 | 77358625 | 77360139 |
| chr14 | 77360779 | 77361827 |
| chr14 | 77384623 | 77386018 |
| chr14 | 77419389 | 77420471 |
| chr14 | 77422722 | 77423576 |
| chr14 | 77431559 | 77432680 |
| chr14 | 77381035 | 77381883 |
| chr14 | 77473473 | 77475246 |
| chr14 | 77477159 | 77478377 |
| chr14 | 77491957 | 77493102 |
| chr14 | 77494028 | 77495719 |
| chr14 | 77498983 | 77500869 |
| chr14 | 77506380 | 77507188 |
| chr14 | 77518833 | 77519916 |
| chr14 | 77525446 | 77526371 |
| chr14 | 77554183 | 77555672 |
| chr14 | 77556459 | 77558776 |
| chr14 | 77563547 | 77564928 |
| chr14 | 77607192 | 77608166 |
| chr14 | 77526051 | 77526194 |
| chr14 | 77637264 | 77637356 |
| chr14 | 78302202 | 78303084 |
| chr14 | 78410968 | 78411799 |
| chr14 | 78412112 | 78413063 |

|       |          |          |
|-------|----------|----------|
| chr14 | 78412112 | 78412802 |
| chr14 | 79039604 | 79041101 |
| chr14 | 79080370 | 79081489 |
| chr14 | 80602254 | 80602523 |
| chr14 | 80699956 | 80700198 |
| chr14 | 81712824 | 81714255 |
| chr14 | 88598584 | 88599772 |
| chr14 | 89241486 | 89242248 |
| chr14 | 89418948 | 89419981 |
| chr14 | 90421575 | 90423333 |
| chr14 | 90520744 | 90521638 |
| chr14 | 90849221 | 90849251 |
| chr14 | 90850373 | 90850488 |
| chr14 | 90865404 | 90866639 |
| chr14 | 90909655 | 90911111 |
| chr14 | 90913832 | 90915014 |
| chr14 | 90940551 | 90943806 |
| chr14 | 90975027 | 90976278 |
| chr14 | 91289007 | 91291117 |
| chr14 | 91593212 | 91594804 |
| chr14 | 91742384 | 91743528 |
| chr14 | 91791838 | 91792596 |
| chr14 | 91797061 | 91798262 |
| chr14 | 91844571 | 91845376 |
| chr14 | 91883624 | 91884730 |
| chr14 | 92218190 | 92219024 |
| chr14 | 92221340 | 92222462 |
| chr14 | 92296142 | 92296470 |
| chr14 | 92372747 | 92373507 |
| chr14 | 92506773 | 92507256 |
| chr14 | 92710042 | 92713444 |
| chr14 | 93227186 | 93228276 |
| chr14 | 93252196 | 93253462 |
| chr14 | 93255015 | 93256622 |
| chr14 | 93358600 | 93360699 |
| chr14 | 93373070 | 93373876 |
| chr14 | 93382028 | 93382848 |
| chr14 | 93393374 | 93394594 |
| chr14 | 93439433 | 93441306 |
| chr14 | 93443937 | 93446650 |
| chr14 | 93482786 | 93484329 |
| chr14 | 93510849 | 93512058 |
| chr14 | 93579010 | 93580459 |

|       |           |           |
|-------|-----------|-----------|
| chr14 | 93581902  | 93582810  |
| chr14 | 93603818  | 93604625  |
| chr14 | 93673027  | 93674266  |
| chr14 | 93093633  | 93094871  |
| chr14 | 93799994  | 93800152  |
| chr14 | 94425169  | 94426077  |
| chr14 | 94774248  | 94775300  |
| chr14 | 94872825  | 94874183  |
| chr14 | 94930451  | 94933030  |
| chr14 | 94943838  | 94944755  |
| chr14 | 95065240  | 95067380  |
| chr14 | 95076434  | 95077682  |
| chr14 | 95081995  | 95086631  |
| chr14 | 95090776  | 95091605  |
| chr14 | 95102810  | 95103931  |
| chr14 | 95112000  | 95112891  |
| chr14 | 95284617  | 95285839  |
| chr14 | 95289792  | 95291117  |
| chr14 | 95522412  | 95523524  |
| chr14 | 95845727  | 95846843  |
| chr14 | 96207004  | 96208333  |
| chr14 | 96271863  | 96273079  |
| chr14 | 96476592  | 96478284  |
| chr14 | 96505088  | 96506603  |
| chr14 | 96561700  | 96563097  |
| chr14 | 96578396  | 96582356  |
| chr14 | 96584784  | 96585810  |
| chr14 | 96670259  | 96671431  |
| chr14 | 96583086  | 96584530  |
| chr14 | 96579174  | 96579283  |
| chr14 | 96967804  | 96967819  |
| chr14 | 96967988  | 96968188  |
| chr14 | 97131898  | 97132631  |
| chr14 | 99218213  | 99219395  |
| chr14 | 99221686  | 99222523  |
| chr14 | 99348009  | 99348780  |
| chr14 | 99469108  | 99471064  |
| chr14 | 99738091  | 99740553  |
| chr14 | 100014873 | 100015695 |
| chr14 | 100045230 | 100046334 |
| chr14 | 100071272 | 100072455 |
| chr14 | 100120403 | 100121677 |
| chr14 | 100144125 | 100145623 |

|       |           |           |
|-------|-----------|-----------|
| chr14 | 100168938 | 100171173 |
| chr14 | 100176013 | 100177349 |
| chr14 | 100244585 | 100246113 |
| chr14 | 100428024 | 100429447 |
| chr14 | 100432478 | 100433389 |
| chr14 | 100435345 | 100436960 |
| chr14 | 100040035 | 100041147 |
| chr14 | 100368058 | 100372057 |
| chr14 | 100071931 | 100072143 |
| chr14 | 100477865 | 100479106 |
| chr14 | 100490258 | 100492145 |
| chr14 | 100490822 | 100491393 |
| chr14 | 100525292 | 100526452 |
| chr14 | 100562193 | 100563754 |
| chr14 | 100620896 | 100622255 |
| chr14 | 100640969 | 100641808 |
| chr14 | 100773046 | 100775005 |
| chr14 | 101052895 | 101053778 |
| chr14 | 101275456 | 101278060 |
| chr14 | 101369251 | 101370255 |
| chr14 | 101523226 | 101524376 |
| chr14 | 101538928 | 101540401 |
| chr14 | 101802179 | 101803187 |
| chr14 | 101873664 | 101874587 |
| chr14 | 101943117 | 101944227 |
| chr14 | 101946956 | 101948147 |
| chr14 | 101947777 | 101947987 |
| chr14 | 102204216 | 102205145 |
| chr14 | 102206644 | 102208081 |
| chr14 | 102413828 | 102415298 |
| chr14 | 102414803 | 102415005 |
| chr14 | 102562747 | 102563617 |
| chr14 | 102605377 | 102606016 |
| chr14 | 102780116 | 102781600 |
| chr14 | 102780725 | 102780834 |
| chr14 | 102781020 | 102781199 |
| chr14 | 102783452 | 102783571 |
| chr14 | 102956344 | 102957212 |
| chr14 | 103157086 | 103157958 |
| chr14 | 103383601 | 103384425 |
| chr14 | 103454172 | 103454398 |
| chr14 | 103477194 | 103478331 |
| chr14 | 103635480 | 103637481 |

|       |           |           |
|-------|-----------|-----------|
| chr14 | 103637958 | 103642329 |
| chr14 | 103658281 | 103660313 |
| chr14 | 103666349 | 103672970 |
| chr14 | 103627231 | 103628932 |
| chr14 | 103706652 | 103707724 |
| chr14 | 103799738 | 103801000 |
| chr14 | 103820630 | 103821422 |
| chr14 | 103851555 | 103852865 |
| chr14 | 103986923 | 103987979 |
| chr14 | 103986923 | 103987979 |
| chr14 | 104202245 | 104203152 |
| chr14 | 104322023 | 104322227 |
| chr14 | 104358406 | 104359387 |
| chr14 | 104367014 | 104368039 |
| chr14 | 104387224 | 104387584 |
| chr14 | 104455158 | 104456352 |
| chr14 | 104531912 | 104534098 |
| chr14 | 104544017 | 104545043 |
| chr14 | 104589982 | 104590860 |
| chr14 | 104595274 | 104596749 |
| chr14 | 104699039 | 104699318 |
| chr14 | 104817770 | 104818681 |
| chr14 | 104846377 | 104847225 |
| chr14 | 105095120 | 105096118 |
| chr14 | 105154824 | 105156053 |
| chr14 | 105181435 | 105182357 |
| chr14 | 105236898 | 105238210 |
| chr14 | 105240454 | 105241617 |
| chr14 | 105265636 | 105266810 |
| chr14 | 105378333 | 105379176 |
| chr14 | 105118335 | 105121129 |
| chr14 | 105399212 | 105400208 |
| chr14 | 105405982 | 105407005 |
| chr14 | 105422827 | 105423683 |
| chr14 | 105434091 | 105435066 |
| chr14 | 105438745 | 105440063 |
| chr14 | 105480650 | 105481592 |
| chr14 | 105486658 | 105487940 |
| chr14 | 105539101 | 105540048 |
| chr14 | 105557662 | 105558732 |
| chr14 | 105566925 | 105567870 |
| chr14 | 105568557 | 105569350 |
| chr14 | 105585192 | 105586149 |

|       |           |           |
|-------|-----------|-----------|
| chr14 | 105587492 | 105588544 |
| chr14 | 105596641 | 105600024 |
| chr14 | 105539197 | 105539402 |
| chr14 | 105605689 | 105607808 |
| chr14 | 105653512 | 105654977 |
| chr14 | 105655406 | 105656228 |
| chr14 | 105714034 | 105715540 |
| chr14 | 105767954 | 105768158 |
| chr14 | 105781056 | 105781946 |
| chr14 | 105803155 | 105804195 |
| chr14 | 105864212 | 105866779 |
| chr14 | 105840524 | 105841535 |
| chr14 | 105933120 | 105934992 |
| chr14 | 105947236 | 105948643 |
| chr14 | 105955664 | 105957921 |
| chr14 | 106083393 | 106084301 |
| chr14 | 106125793 | 106126746 |
| chr14 | 106874056 | 106874283 |
| chr14 | 106874439 | 106874463 |
| chr15 | 20562458  | 20563535  |
| chr15 | 20545006  | 20548203  |
| chr15 | 20591482  | 20591638  |
| chr15 | 20613537  | 20614284  |
| chr15 | 20849253  | 20849355  |
| chr15 | 20851256  | 20851969  |
| chr15 | 25302550  | 25304620  |
| chr15 | 25315158  | 25318267  |
| chr15 | 33360155  | 33361625  |
| chr15 | 34453408  | 34453637  |
| chr15 | 42197904  | 42199156  |
| chr15 | 43653173  | 43653826  |
| chr15 | 45613436  | 45613575  |
| chr15 | 49813283  | 49813513  |
| chr15 | 49831901  | 49832414  |
| chr15 | 49845865  | 49846093  |
| chr15 | 49850394  | 49851277  |
| chr15 | 49851643  | 49851777  |
| chr15 | 49911221  | 49911847  |
| chr15 | 49938050  | 49938943  |
| chr15 | 49944469  | 49945693  |
| chr15 | 49964113  | 49965652  |
| chr15 | 49965962  | 49968655  |
| chr15 | 49974309  | 49976599  |

|       |          |          |
|-------|----------|----------|
| chr15 | 49978554 | 49980726 |
| chr15 | 49984119 | 49985121 |
| chr15 | 49969502 | 49974042 |
| chr15 | 49971865 | 49972088 |
| chr15 | 50006612 | 50007630 |
| chr15 | 50009406 | 50011222 |
| chr15 | 50011793 | 50012784 |
| chr15 | 50015843 | 50020098 |
| chr15 | 49999559 | 50004436 |
| chr15 | 50033885 | 50034398 |
| chr15 | 50040630 | 50041902 |
| chr15 | 50042283 | 50044355 |
| chr15 | 50044990 | 50045798 |
| chr15 | 50049722 | 50051401 |
| chr15 | 50102227 | 50102926 |
| chr15 | 50109030 | 50109872 |
| chr15 | 50116998 | 50117159 |
| chr15 | 50117002 | 50117159 |
| chr15 | 50123853 | 50124920 |
| chr15 | 50132236 | 50132881 |
| chr15 | 50168420 | 50169341 |
| chr15 | 50184780 | 50184991 |
| chr15 | 50190786 | 50190798 |
| chr15 | 50191593 | 50193783 |
| chr15 | 50194130 | 50195640 |
| chr15 | 50198430 | 50203664 |
| chr15 | 50217844 | 50220680 |
| chr15 | 50221218 | 50222114 |
| chr15 | 50213835 | 50217060 |
| chr15 | 50270370 | 50270506 |
| chr15 | 50276087 | 50277678 |
| chr15 | 50289319 | 50290192 |
| chr15 | 50291788 | 50292644 |
| chr15 | 50280596 | 50288897 |
| chr15 | 50284425 | 50284693 |
| chr15 | 50295921 | 50297013 |
| chr15 | 50303026 | 50303973 |
| chr15 | 50307759 | 50308632 |
| chr15 | 50319202 | 50320361 |
| chr15 | 50328620 | 50329986 |
| chr15 | 50332256 | 50332764 |
| chr15 | 50343483 | 50345366 |
| chr15 | 50348843 | 50352527 |



|       |          |          |
|-------|----------|----------|
| chr15 | 50352920 | 50354430 |
| chr15 | 50345725 | 50348316 |
| chr15 | 50344577 | 50344879 |
| chr15 | 50347911 | 50348189 |
| chr15 | 50376868 | 50377530 |
| chr15 | 50399678 | 50400776 |
| chr15 | 50402735 | 50407778 |
| chr15 | 50415888 | 50421373 |
| chr15 | 50426661 | 50428038 |
| chr15 | 50435139 | 50435860 |
| chr15 | 50455620 | 50455825 |
| chr15 | 50456395 | 50457232 |
| chr15 | 50469078 | 50469326 |
| chr15 | 50472899 | 50476475 |
| chr15 | 50485071 | 50485544 |
| chr15 | 50497187 | 50499657 |
| chr15 | 50500036 | 50503956 |
| chr15 | 50519191 | 50520314 |
| chr15 | 50520741 | 50522015 |
| chr15 | 50522659 | 50523288 |
| chr15 | 50526478 | 50528061 |
| chr15 | 50529836 | 50531351 |
| chr15 | 50532984 | 50536449 |
| chr15 | 50537735 | 50539052 |
| chr15 | 50554096 | 50555865 |
| chr15 | 50557699 | 50558994 |
| chr15 | 50539551 | 50551879 |
| chr15 | 50559505 | 50562243 |
| chr15 | 50529981 | 50530124 |
| chr15 | 50542235 | 50542441 |
| chr15 | 50554780 | 50554980 |
| chr15 | 50709225 | 50710805 |
| chr15 | 50824297 | 50824501 |
| chr15 | 50978151 | 50979561 |
| chr15 | 51057358 | 51058422 |
| chr15 | 51057771 | 51058530 |
| chr15 | 51059803 | 51060007 |
| chr15 | 51146896 | 51147827 |
| chr15 | 51171157 | 51171745 |
| chr15 | 51199696 | 51200268 |
| chr15 | 51333753 | 51335380 |
| chr15 | 51335717 | 51337183 |
| chr15 | 51338032 | 51340088 |

|       |          |          |
|-------|----------|----------|
| chr15 | 51341879 | 51343062 |
| chr15 | 51349393 | 51351002 |
| chr15 | 51351979 | 51352693 |
| chr15 | 51354475 | 51355583 |
| chr15 | 51356019 | 51356977 |
| chr15 | 51359937 | 51360907 |
| chr15 | 51380824 | 51382839 |
| chr15 | 51386724 | 51388620 |
| chr15 | 51399885 | 51400821 |
| chr15 | 51403198 | 51404861 |
| chr15 | 51407488 | 51408504 |
| chr15 | 51329734 | 51333325 |
| chr15 | 51347312 | 51349121 |
| chr15 | 51412791 | 51413634 |
| chr15 | 51330636 | 51330860 |
| chr15 | 51386724 | 51386755 |
| chr15 | 51388149 | 51388349 |
| chr15 | 51416216 | 51417246 |
| chr15 | 51421471 | 51422404 |
| chr15 | 51423963 | 51426080 |
| chr15 | 51447532 | 51448874 |
| chr15 | 51453906 | 51456348 |
| chr15 | 51443448 | 51446713 |
| chr15 | 51463373 | 51464132 |
| chr15 | 51471131 | 51472016 |
| chr15 | 51473080 | 51474096 |
| chr15 | 51476712 | 51478379 |
| chr15 | 51482255 | 51483641 |
| chr15 | 51484611 | 51485706 |
| chr15 | 51490485 | 51491487 |
| chr15 | 51516111 | 51517033 |
| chr15 | 51519631 | 51522623 |
| chr15 | 51524564 | 51525426 |
| chr15 | 51533885 | 51534840 |
| chr15 | 51535383 | 51537451 |
| chr15 | 51537818 | 51538539 |
| chr15 | 51541657 | 51543064 |
| chr15 | 51545414 | 51546543 |
| chr15 | 51550924 | 51552804 |
| chr15 | 51553005 | 51556512 |
| chr15 | 51557770 | 51558644 |
| chr15 | 51561785 | 51562752 |
| chr15 | 51563471 | 51564715 |

|       |          |          |
|-------|----------|----------|
| chr15 | 51570821 | 51571826 |
| chr15 | 51578329 | 51579668 |
| chr15 | 51583982 | 51585354 |
| chr15 | 51588686 | 51589730 |
| chr15 | 51599911 | 51601529 |
| chr15 | 51602308 | 51603212 |
| chr15 | 51607231 | 51609288 |
| chr15 | 51610515 | 51612529 |
| chr15 | 51613354 | 51614450 |
| chr15 | 51615434 | 51617163 |
| chr15 | 51619899 | 51621460 |
| chr15 | 51622253 | 51623648 |
| chr15 | 51629598 | 51635803 |
| chr15 | 51637529 | 51638559 |
| chr15 | 51644884 | 51646997 |
| chr15 | 51652215 | 51653732 |
| chr15 | 51655121 | 51656918 |
| chr15 | 51663176 | 51664882 |
| chr15 | 51666191 | 51667021 |
| chr15 | 51676014 | 51677181 |
| chr15 | 51682786 | 51683627 |
| chr15 | 51685546 | 51686530 |
| chr15 | 51693267 | 51695474 |
| chr15 | 51699613 | 51700891 |
| chr15 | 51701336 | 51703044 |
| chr15 | 51559368 | 51560529 |
| chr15 | 51593201 | 51595530 |
| chr15 | 51624593 | 51626393 |
| chr15 | 51657614 | 51662853 |
| chr15 | 51510324 | 51512716 |
| chr15 | 51561894 | 51562083 |
| chr15 | 51570821 | 51570921 |
| chr15 | 51594858 | 51595059 |
| chr15 | 51611049 | 51611216 |
| chr15 | 51624787 | 51624891 |
| chr15 | 51694848 | 51694996 |
| chr15 | 51733213 | 51734103 |
| chr15 | 51734618 | 51735732 |
| chr15 | 51776202 | 51776894 |
| chr15 | 51791172 | 51791917 |
| chr15 | 51913527 | 51915622 |
| chr15 | 51918433 | 51919693 |
| chr15 | 51967065 | 51969194 |

|       |          |          |
|-------|----------|----------|
| chr15 | 51971171 | 51972109 |
| chr15 | 51972703 | 51974825 |
| chr15 | 51982606 | 51983974 |
| chr15 | 51989934 | 51991063 |
| chr15 | 51985013 | 51986486 |
| chr15 | 51973412 | 51973807 |
| chr15 | 51973856 | 51974194 |
| chr15 | 51990615 | 51991063 |
| chr15 | 52024071 | 52024638 |
| chr15 | 52030258 | 52030280 |
| chr15 | 52040817 | 52042217 |
| chr15 | 52043317 | 52044156 |
| chr15 | 52047430 | 52047610 |
| chr15 | 52050540 | 52051518 |
| chr15 | 52051929 | 52052710 |
| chr15 | 52068041 | 52070026 |
| chr15 | 52068936 | 52069122 |
| chr15 | 52091109 | 52091373 |
| chr15 | 52121359 | 52121602 |
| chr15 | 52263646 | 52263951 |
| chr15 | 52287165 | 52287601 |
| chr15 | 52295596 | 52295742 |
| chr15 | 52310879 | 52311067 |
| chr15 | 52325527 | 52325634 |
| chr15 | 52363416 | 52364502 |
| chr15 | 52370397 | 52371263 |
| chr15 | 52385248 | 52386996 |
| chr15 | 52391817 | 52392431 |
| chr15 | 52397417 | 52398932 |
| chr15 | 52404180 | 52405028 |
| chr15 | 52395363 | 52396950 |
| chr15 | 52423021 | 52423124 |
| chr15 | 52433698 | 52434823 |
| chr15 | 52471003 | 52471037 |
| chr15 | 52478265 | 52479085 |
| chr15 | 52509141 | 52509647 |
| chr15 | 52509460 | 52509675 |
| chr15 | 52544822 | 52545897 |
| chr15 | 52556888 | 52557924 |
| chr15 | 52581165 | 52582193 |
| chr15 | 52581686 | 52582208 |
| chr15 | 52586210 | 52588483 |
| chr15 | 52623755 | 52624372 |

|       |          |          |
|-------|----------|----------|
| chr15 | 52814219 | 52815033 |
| chr15 | 52817326 | 52818595 |
| chr15 | 52819558 | 52822101 |
| chr15 | 52859894 | 52862160 |
| chr15 | 52987651 | 52988312 |
| chr15 | 53004456 | 53005355 |
| chr15 | 53002031 | 53003298 |
| chr15 | 53023620 | 53024422 |
| chr15 | 53055080 | 53055360 |
| chr15 | 53055945 | 53055999 |
| chr15 | 53079709 | 53081529 |
| chr15 | 53094169 | 53096792 |
| chr15 | 53103251 | 53103519 |
| chr15 | 53139306 | 53140403 |
| chr15 | 53147483 | 53148796 |
| chr15 | 53151092 | 53151921 |
| chr15 | 53155698 | 53156591 |
| chr15 | 53158317 | 53161919 |
| chr15 | 53166825 | 53168763 |
| chr15 | 53176523 | 53177368 |
| chr15 | 53227761 | 53228633 |
| chr15 | 53231480 | 53232457 |
| chr15 | 53269270 | 53270764 |
| chr15 | 53363420 | 53363465 |
| chr15 | 53364180 | 53364513 |
| chr15 | 53700438 | 53701052 |
| chr15 | 54099794 | 54100815 |
| chr15 | 54124989 | 54126086 |
| chr15 | 54129145 | 54130017 |
| chr15 | 54306134 | 54307259 |
| chr15 | 56538215 | 56538408 |
| chr15 | 57025178 | 57025488 |
| chr15 | 57026086 | 57026893 |
| chr15 | 58664055 | 58664972 |
| chr15 | 60353390 | 60354790 |
| chr15 | 60353560 | 60353771 |
| chr15 | 60354280 | 60354383 |
| chr15 | 62042218 | 62043228 |
| chr15 | 62553436 | 62555436 |
| chr15 | 63124086 | 63125253 |
| chr15 | 63188092 | 63190138 |
| chr15 | 63795924 | 63797501 |
| chr15 | 64218520 | 64219328 |

|       |          |          |
|-------|----------|----------|
| chr15 | 64219215 | 64219328 |
| chr15 | 64342275 | 64343211 |
| chr15 | 64679790 | 64679906 |
| chr15 | 65197318 | 65198323 |
| chr15 | 65903876 | 65904170 |
| chr15 | 66084561 | 66085287 |
| chr15 | 66161290 | 66162291 |
| chr15 | 66191509 | 66192319 |
| chr15 | 66196284 | 66197335 |
| chr15 | 66201703 | 66202552 |
| chr15 | 66316377 | 66317243 |
| chr15 | 66320122 | 66321168 |
| chr15 | 66433914 | 66434719 |
| chr15 | 66583964 | 66585166 |
| chr15 | 66680178 | 66680421 |
| chr15 | 66789738 | 66791293 |
| chr15 | 66992894 | 66993866 |
| chr15 | 66994477 | 66995288 |
| chr15 | 67002627 | 67003607 |
| chr15 | 67047237 | 67048609 |
| chr15 | 67057721 | 67058637 |
| chr15 | 67062908 | 67063694 |
| chr15 | 67169802 | 67170654 |
| chr15 | 67180959 | 67182711 |
| chr15 | 66992900 | 66993056 |
| chr15 | 66993833 | 66993866 |
| chr15 | 66994477 | 66995288 |
| chr15 | 67315554 | 67317288 |
| chr15 | 67357484 | 67358695 |
| chr15 | 67372680 | 67373676 |
| chr15 | 67417206 | 67418606 |
| chr15 | 67441923 | 67443083 |
| chr15 | 67305245 | 67306034 |
| chr15 | 67403359 | 67404238 |
| chr15 | 67836943 | 67837306 |
| chr15 | 68125601 | 68126561 |
| chr15 | 68131657 | 68133390 |
| chr15 | 68125601 | 68126561 |
| chr15 | 68131657 | 68132315 |
| chr15 | 68187250 | 68188196 |
| chr15 | 68210498 | 68211482 |
| chr15 | 68279419 | 68280279 |
| chr15 | 68521298 | 68521672 |

|       |          |          |
|-------|----------|----------|
| chr15 | 68522075 | 68522419 |
| chr15 | 68569471 | 68570635 |
| chr15 | 68577135 | 68578161 |
| chr15 | 68631796 | 68632632 |
| chr15 | 68830627 | 68832142 |
| chr15 | 68870023 | 68870916 |
| chr15 | 68892549 | 68893973 |
| chr15 | 68991389 | 68992225 |
| chr15 | 69109204 | 69110259 |
| chr15 | 69149013 | 69150598 |
| chr15 | 69299328 | 69302722 |
| chr15 | 69366379 | 69367679 |
| chr15 | 69396005 | 69396803 |
| chr15 | 69420705 | 69421917 |
| chr15 | 69270916 | 69271734 |
| chr15 | 69271555 | 69271680 |
| chr15 | 69706119 | 69707771 |
| chr15 | 69744441 | 69745291 |
| chr15 | 69759912 | 69760688 |
| chr15 | 69773161 | 69774297 |
| chr15 | 69776048 | 69778058 |
| chr15 | 69885719 | 69886966 |
| chr15 | 69843227 | 69845224 |
| chr15 | 69760642 | 69760688 |
| chr15 | 69915171 | 69916263 |
| chr15 | 69960139 | 69960997 |
| chr15 | 70036677 | 70037667 |
| chr15 | 70111344 | 70112328 |
| chr15 | 70166169 | 70167013 |
| chr15 | 70216746 | 70217697 |
| chr15 | 70263070 | 70263878 |
| chr15 | 70294685 | 70295764 |
| chr15 | 70433023 | 70433836 |
| chr15 | 70488388 | 70489777 |
| chr15 | 70517128 | 70518356 |
| chr15 | 70523267 | 70524550 |
| chr15 | 70537382 | 70538108 |
| chr15 | 70583418 | 70584450 |
| chr15 | 70615731 | 70617417 |
| chr15 | 70626064 | 70627450 |
| chr15 | 70635892 | 70636846 |
| chr15 | 70640722 | 70641874 |
| chr15 | 70649023 | 70650283 |

|       |          |          |
|-------|----------|----------|
| chr15 | 70666519 | 70668180 |
| chr15 | 70670169 | 70671144 |
| chr15 | 70673321 | 70674611 |
| chr15 | 70697841 | 70698874 |
| chr15 | 70710331 | 70711387 |
| chr15 | 70714384 | 70715206 |
| chr15 | 70716595 | 70717654 |
| chr15 | 70719367 | 70720538 |
| chr15 | 70754238 | 70755923 |
| chr15 | 70762815 | 70763646 |
| chr15 | 70769221 | 70770208 |
| chr15 | 70797822 | 70801581 |
| chr15 | 70801838 | 70803334 |
| chr15 | 70804634 | 70805419 |
| chr15 | 70818699 | 70819582 |
| chr15 | 70820244 | 70821243 |
| chr15 | 70914205 | 70915533 |
| chr15 | 70919991 | 70920821 |
| chr15 | 70383813 | 70387588 |
| chr15 | 70433673 | 70433784 |
| chr15 | 70641457 | 70641656 |
| chr15 | 70973221 | 70973346 |
| chr15 | 71091026 | 71092826 |
| chr15 | 71116658 | 71117662 |
| chr15 | 71146758 | 71147418 |
| chr15 | 71149820 | 71150343 |
| chr15 | 71167058 | 71167880 |
| chr15 | 71185225 | 71185394 |
| chr15 | 71370875 | 71372613 |
| chr15 | 71375535 | 71377196 |
| chr15 | 71378006 | 71379470 |
| chr15 | 71380577 | 71380615 |
| chr15 | 71368463 | 71370637 |
| chr15 | 71389152 | 71389362 |
| chr15 | 71397758 | 71399298 |
| chr15 | 71406422 | 71407673 |
| chr15 | 71408031 | 71409243 |
| chr15 | 71407452 | 71407669 |
| chr15 | 71586939 | 71587889 |
| chr15 | 71587400 | 71587972 |
| chr15 | 71621660 | 71622010 |
| chr15 | 71621832 | 71622010 |
| chr15 | 71753303 | 71754355 |



|       |          |          |
|-------|----------|----------|
| chr15 | 71796535 | 71797318 |
| chr15 | 71903422 | 71904463 |
| chr15 | 72052031 | 72053026 |
| chr15 | 72099235 | 72100443 |
| chr15 | 72113083 | 72115120 |
| chr15 | 72410651 | 72411478 |
| chr15 | 72447340 | 72448675 |
| chr15 | 72460113 | 72460910 |
| chr15 | 72476524 | 72477570 |
| chr15 | 72520803 | 72522103 |
| chr15 | 72523128 | 72524505 |
| chr15 | 72527021 | 72528033 |
| chr15 | 72520886 | 72521301 |
| chr15 | 72553867 | 72554657 |
| chr15 | 72564828 | 72565672 |
| chr15 | 72574774 | 72575633 |
| chr15 | 72650907 | 72652098 |
| chr15 | 72977906 | 72979029 |
| chr15 | 72978877 | 72978980 |
| chr15 | 73130332 | 73131104 |
| chr15 | 73088725 | 73089860 |
| chr15 | 73239524 | 73240855 |
| chr15 | 73448633 | 73448781 |
| chr15 | 73610247 | 73611118 |
| chr15 | 73638789 | 73640624 |
| chr15 | 73654659 | 73655467 |
| chr15 | 73656045 | 73656910 |
| chr15 | 73660587 | 73661615 |
| chr15 | 73670346 | 73671318 |
| chr15 | 73679084 | 73679889 |
| chr15 | 73893977 | 73894986 |
| chr15 | 73903699 | 73904606 |
| chr15 | 74035038 | 74035969 |
| chr15 | 74067126 | 74068078 |
| chr15 | 74099975 | 74100780 |
| chr15 | 74101611 | 74102573 |
| chr15 | 74114849 | 74116013 |
| chr15 | 74133970 | 74134714 |
| chr15 | 74149153 | 74150148 |
| chr15 | 74156363 | 74157390 |
| chr15 | 74160889 | 74161959 |
| chr15 | 74183958 | 74184840 |
| chr15 | 74200451 | 74201408 |

|       |          |          |
|-------|----------|----------|
| chr15 | 74210800 | 74211794 |
| chr15 | 74258486 | 74259630 |
| chr15 | 74218382 | 74220004 |
| chr15 | 74035343 | 74035467 |
| chr15 | 74425118 | 74426885 |
| chr15 | 74477644 | 74478880 |
| chr15 | 74487670 | 74489092 |
| chr15 | 74511890 | 74513254 |
| chr15 | 74516434 | 74517317 |
| chr15 | 74531899 | 74533166 |
| chr15 | 74548007 | 74549635 |
| chr15 | 74574120 | 74575479 |
| chr15 | 74583336 | 74584776 |
| chr15 | 74641559 | 74642815 |
| chr15 | 74645598 | 74646473 |
| chr15 | 74685682 | 74687127 |
| chr15 | 74688935 | 74690731 |
| chr15 | 74698790 | 74700034 |
| chr15 | 74719944 | 74720905 |
| chr15 | 74723352 | 74724504 |
| chr15 | 74728080 | 74729126 |
| chr15 | 74740262 | 74740988 |
| chr15 | 74752994 | 74754215 |
| chr15 | 74837966 | 74839369 |
| chr15 | 74840679 | 74841478 |
| chr15 | 74855663 | 74856588 |
| chr15 | 74898846 | 74899693 |
| chr15 | 74902491 | 74903463 |
| chr15 | 74913223 | 74914038 |
| chr15 | 74906795 | 74908313 |
| chr15 | 74923206 | 74924495 |
| chr15 | 75015814 | 75017062 |
| chr15 | 75017434 | 75018760 |
| chr15 | 75022496 | 75022873 |
| chr15 | 75022496 | 75023777 |
| chr15 | 75067389 | 75068240 |
| chr15 | 75073651 | 75075062 |
| chr15 | 75080866 | 75082554 |
| chr15 | 75107154 | 75110359 |
| chr15 | 75111156 | 75112009 |
| chr15 | 75113108 | 75114192 |
| chr15 | 75122707 | 75124384 |
| chr15 | 75134902 | 75136488 |

|       |          |          |
|-------|----------|----------|
| chr15 | 75122902 | 75123092 |
| chr15 | 75173619 | 75176364 |
| chr15 | 75194154 | 75195036 |
| chr15 | 75197892 | 75199325 |
| chr15 | 75229733 | 75230015 |
| chr15 | 75248041 | 75249510 |
| chr15 | 75287737 | 75288573 |
| chr15 | 75307185 | 75308141 |
| chr15 | 75328110 | 75329293 |
| chr15 | 75368302 | 75369455 |
| chr15 | 75473766 | 75475018 |
| chr15 | 75493177 | 75495697 |
| chr15 | 75516133 | 75517018 |
| chr15 | 75524008 | 75525733 |
| chr15 | 75603689 | 75604216 |
| chr15 | 75658663 | 75661731 |
| chr15 | 75871976 | 75872375 |
| chr15 | 75932029 | 75933036 |
| chr15 | 75939294 | 75940513 |
| chr15 | 76098366 | 76099237 |
| chr15 | 76195730 | 76196293 |
| chr15 | 76350922 | 76352060 |
| chr15 | 76351148 | 76351909 |
| chr15 | 76604814 | 76605379 |
| chr15 | 76626067 | 76626931 |
| chr15 | 76638099 | 76639042 |
| chr15 | 77208561 | 77208726 |
| chr15 | 77208779 | 77208899 |
| chr15 | 77328188 | 77329152 |
| chr15 | 77363703 | 77364258 |
| chr15 | 77399213 | 77400454 |
| chr15 | 77788766 | 77789862 |
| chr15 | 77795231 | 77797496 |
| chr15 | 77835592 | 77836612 |
| chr15 | 77908813 | 77909834 |
| chr15 | 77920373 | 77921086 |
| chr15 | 77925308 | 77926690 |
| chr15 | 77933250 | 77934378 |
| chr15 | 77945639 | 77948093 |
| chr15 | 77960638 | 77961480 |
| chr15 | 77994596 | 77995617 |
| chr15 | 78015728 | 78016537 |
| chr15 | 78046515 | 78047579 |

|       |          |          |
|-------|----------|----------|
| chr15 | 78076288 | 78077262 |
| chr15 | 78090114 | 78091069 |
| chr15 | 78123834 | 78125990 |
| chr15 | 77922253 | 77923528 |
| chr15 | 77994747 | 77994856 |
| chr15 | 78358278 | 78359371 |
| chr15 | 78362351 | 78363320 |
| chr15 | 78414310 | 78415136 |
| chr15 | 78415408 | 78416351 |
| chr15 | 78423302 | 78424586 |
| chr15 | 78414328 | 78414550 |
| chr15 | 78482745 | 78485196 |
| chr15 | 78508650 | 78509893 |
| chr15 | 78512272 | 78513016 |
| chr15 | 78591327 | 78592144 |
| chr15 | 78657280 | 78658994 |
| chr15 | 78698721 | 78699867 |
| chr15 | 78729679 | 78730461 |
| chr15 | 78675841 | 78676825 |
| chr15 | 78799590 | 78800484 |
| chr15 | 78857691 | 78859119 |
| chr15 | 78910786 | 78912565 |
| chr15 | 78915592 | 78916446 |
| chr15 | 78925979 | 78926928 |
| chr15 | 78976373 | 78977280 |
| chr15 | 78910786 | 78912565 |
| chr15 | 78915592 | 78915700 |
| chr15 | 78916421 | 78916446 |
| chr15 | 79101105 | 79102032 |
| chr15 | 79222812 | 79224460 |
| chr15 | 79225190 | 79226220 |
| chr15 | 79243880 | 79244173 |
| chr15 | 79263381 | 79264478 |
| chr15 | 79264781 | 79265742 |
| chr15 | 79303288 | 79304313 |
| chr15 | 79352692 | 79353767 |
| chr15 | 79376920 | 79377788 |
| chr15 | 79434123 | 79439138 |
| chr15 | 79281665 | 79283460 |
| chr15 | 79471055 | 79472326 |
| chr15 | 79495725 | 79496499 |
| chr15 | 79512519 | 79513296 |
| chr15 | 79521129 | 79522289 |

|       |          |          |
|-------|----------|----------|
| chr15 | 79621029 | 79622120 |
| chr15 | 79624904 | 79626158 |
| chr15 | 79715239 | 79716058 |
| chr15 | 79772405 | 79773262 |
| chr15 | 79899968 | 79901123 |
| chr15 | 79967845 | 79968820 |
| chr15 | 79968485 | 79968587 |
| chr15 | 80188547 | 80189100 |
| chr15 | 80189805 | 80190028 |
| chr15 | 80351516 | 80351525 |
| chr15 | 80351516 | 80351795 |
| chr15 | 80448704 | 80449772 |
| chr15 | 80523569 | 80524716 |
| chr15 | 80557020 | 80558051 |
| chr15 | 80627199 | 80628499 |
| chr15 | 80681276 | 80681818 |
| chr15 | 80695461 | 80696919 |
| chr15 | 80767942 | 80768832 |
| chr15 | 80773858 | 80774798 |
| chr15 | 80787556 | 80788481 |
| chr15 | 80892670 | 80893475 |
| chr15 | 80914087 | 80916126 |
| chr15 | 80932774 | 80934033 |
| chr15 | 80987453 | 80989101 |
| chr15 | 80988784 | 80989052 |
| chr15 | 81029687 | 81030832 |
| chr15 | 81041582 | 81042775 |
| chr15 | 81034466 | 81036568 |
| chr15 | 81068608 | 81070404 |
| chr15 | 81072016 | 81072908 |
| chr15 | 81073933 | 81074773 |
| chr15 | 81096038 | 81098205 |
| chr15 | 81104489 | 81105571 |
| chr15 | 81129343 | 81130342 |
| chr15 | 81135705 | 81136810 |
| chr15 | 81189631 | 81190783 |
| chr15 | 81217002 | 81218081 |
| chr15 | 81235184 | 81236399 |
| chr15 | 81288275 | 81289213 |
| chr15 | 81292752 | 81294500 |
| chr15 | 81382078 | 81382971 |
| chr15 | 81466151 | 81466930 |
| chr15 | 81466435 | 81466644 |

|       |          |          |
|-------|----------|----------|
| chr15 | 81570724 | 81573372 |
| chr15 | 81574110 | 81575199 |
| chr15 | 81616169 | 81617270 |
| chr15 | 81651536 | 81652637 |
| chr15 | 81702245 | 81703131 |
| chr15 | 82044507 | 82045768 |
| chr15 | 82207061 | 82207932 |
| chr15 | 82209162 | 82209516 |
| chr15 | 82231573 | 82232859 |
| chr15 | 82338479 | 82339342 |
| chr15 | 82364728 | 82366054 |
| chr15 | 82476360 | 82477083 |
| chr15 | 83234943 | 83236128 |
| chr15 | 83316209 | 83317306 |
| chr15 | 83331609 | 83332645 |
| chr15 | 83377892 | 83378023 |
| chr15 | 83378645 | 83379238 |
| chr15 | 83418958 | 83419889 |
| chr15 | 83477624 | 83477757 |
| chr15 | 83516021 | 83516912 |
| chr15 | 83540989 | 83541924 |
| chr15 | 83563857 | 83564085 |
| chr15 | 83604460 | 83605109 |
| chr15 | 83610790 | 83611374 |
| chr15 | 83611528 | 83612124 |
| chr15 | 83620780 | 83620846 |
| chr15 | 83679774 | 83679977 |
| chr15 | 83775159 | 83776712 |
| chr15 | 83878203 | 83879783 |
| chr15 | 83918336 | 83918605 |
| chr15 | 84117599 | 84118653 |
| chr15 | 84157587 | 84158426 |
| chr15 | 84196181 | 84198593 |
| chr15 | 84197918 | 84198100 |
| chr15 | 84321578 | 84322528 |
| chr15 | 84421514 | 84422195 |
| chr15 | 84623588 | 84624599 |
| chr15 | 84639163 | 84639380 |
| chr15 | 84645442 | 84646736 |
| chr15 | 85143775 | 85144732 |
| chr15 | 85176323 | 85177746 |
| chr15 | 85163521 | 85166554 |
| chr15 | 85164362 | 85165779 |

|       |          |          |
|-------|----------|----------|
| chr15 | 85197168 | 85197658 |
| chr15 | 85198392 | 85198611 |
| chr15 | 85202650 | 85203399 |
| chr15 | 85290612 | 85290993 |
| chr15 | 85292457 | 85292586 |
| chr15 | 85347583 | 85348085 |
| chr15 | 85360770 | 85361584 |
| chr15 | 85400483 | 85401241 |
| chr15 | 85402024 | 85403848 |
| chr15 | 85406988 | 85407696 |
| chr15 | 85413260 | 85414263 |
| chr15 | 85421346 | 85422605 |
| chr15 | 85437826 | 85439131 |
| chr15 | 85456029 | 85457173 |
| chr15 | 85472609 | 85473986 |
| chr15 | 85481570 | 85482475 |
| chr15 | 85483632 | 85484390 |
| chr15 | 85490403 | 85491205 |
| chr15 | 85510106 | 85511563 |
| chr15 | 85515108 | 85516492 |
| chr15 | 85531433 | 85532532 |
| chr15 | 85532773 | 85533511 |
| chr15 | 85505418 | 85509576 |
| chr15 | 85523082 | 85526275 |
| chr15 | 85457710 | 85458948 |
| chr15 | 85413508 | 85413649 |
| chr15 | 85553517 | 85554273 |
| chr15 | 85566595 | 85566805 |
| chr15 | 85605541 | 85605645 |
| chr15 | 85873870 | 85875235 |
| chr15 | 85996076 | 85996501 |
| chr15 | 86045574 | 86046584 |
| chr15 | 86126086 | 86127066 |
| chr15 | 86438111 | 86438906 |
| chr15 | 86438372 | 86438579 |
| chr15 | 86510125 | 86510994 |
| chr15 | 86547031 | 86547961 |
| chr15 | 86689076 | 86690039 |
| chr15 | 86759644 | 86760950 |
| chr15 | 86764013 | 86765150 |
| chr15 | 86802458 | 86803423 |
| chr15 | 86871729 | 86873435 |
| chr15 | 86882043 | 86883080 |

|       |          |          |
|-------|----------|----------|
| chr15 | 86988362 | 86989278 |
| chr15 | 86983394 | 86983584 |
| chr15 | 87167524 | 87167596 |
| chr15 | 87339724 | 87339839 |
| chr15 | 87406368 | 87408092 |
| chr15 | 87419958 | 87421110 |
| chr15 | 87420697 | 87420897 |
| chr15 | 87454923 | 87457673 |
| chr15 | 87457945 | 87459634 |
| chr15 | 87466821 | 87468084 |
| chr15 | 87456580 | 87456780 |
| chr15 | 87458699 | 87458904 |
| chr15 | 87458929 | 87459363 |
| chr15 | 87476732 | 87476946 |
| chr15 | 87478371 | 87478824 |
| chr15 | 87484724 | 87485298 |
| chr15 | 87558072 | 87560227 |
| chr15 | 87555922 | 87557081 |
| chr15 | 87590236 | 87590715 |
| chr15 | 87684098 | 87684325 |
| chr15 | 87712658 | 87713453 |
| chr15 | 87736247 | 87736557 |
| chr15 | 87737416 | 87738659 |
| chr15 | 87749909 | 87752055 |
| chr15 | 87768110 | 87769109 |
| chr15 | 87817413 | 87817632 |
| chr15 | 87844532 | 87845503 |
| chr15 | 87844701 | 87845503 |
| chr15 | 87891649 | 87892619 |
| chr15 | 87895642 | 87896863 |
| chr15 | 87911203 | 87912118 |
| chr15 | 87938044 | 87938524 |
| chr15 | 87957559 | 87958678 |
| chr15 | 87960180 | 87960951 |
| chr15 | 88025895 | 88026526 |
| chr15 | 88035444 | 88036219 |
| chr15 | 88037909 | 88039061 |
| chr15 | 88050683 | 88051291 |
| chr15 | 88066719 | 88067586 |
| chr15 | 88070206 | 88072751 |
| chr15 | 88075424 | 88077133 |
| chr15 | 88062557 | 88065423 |
| chr15 | 88140527 | 88141109 |



|       |          |          |
|-------|----------|----------|
| chr15 | 88167465 | 88168960 |
| chr15 | 88199010 | 88199994 |
| chr15 | 88214255 | 88215784 |
| chr15 | 88224282 | 88225513 |
| chr15 | 88228437 | 88229650 |
| chr15 | 88268819 | 88269541 |
| chr15 | 88269006 | 88269108 |
| chr15 | 88295137 | 88296461 |
| chr15 | 88295595 | 88295757 |
| chr15 | 88348123 | 88349123 |
| chr15 | 88526280 | 88527290 |
| chr15 | 88627422 | 88628345 |
| chr15 | 88728030 | 88728244 |
| chr15 | 88786870 | 88788344 |
| chr15 | 88869325 | 88870368 |
| chr15 | 88953559 | 88954520 |
| chr15 | 88986769 | 88990094 |
| chr15 | 89008627 | 89009915 |
| chr15 | 89027478 | 89029283 |
| chr15 | 88997718 | 88998917 |
| chr15 | 88998181 | 88998417 |
| chr15 | 88998590 | 88998746 |
| chr15 | 89029191 | 89029283 |
| chr15 | 89164893 | 89166040 |
| chr15 | 89178949 | 89179905 |
| chr15 | 89181732 | 89182651 |
| chr15 | 89231281 | 89232731 |
| chr15 | 89318329 | 89320617 |
| chr15 | 89346870 | 89347702 |
| chr15 | 89346870 | 89347702 |
| chr15 | 89644178 | 89644922 |
| chr15 | 89661680 | 89663782 |
| chr15 | 89664006 | 89665389 |
| chr15 | 89683023 | 89683527 |
| chr15 | 89721305 | 89722229 |
| chr15 | 89786598 | 89787323 |
| chr15 | 89787882 | 89787897 |
| chr15 | 89877401 | 89879085 |
| chr15 | 89900492 | 89901299 |
| chr15 | 89901737 | 89902797 |
| chr15 | 89904404 | 89905784 |
| chr15 | 89907007 | 89907928 |
| chr15 | 89911693 | 89912552 |

|       |          |          |
|-------|----------|----------|
| chr15 | 89919919 | 89923815 |
| chr15 | 89956733 | 89958207 |
| chr15 | 89962175 | 89963434 |
| chr15 | 89968397 | 89969172 |
| chr15 | 89973754 | 89975036 |
| chr15 | 89994632 | 89995942 |
| chr15 | 90019806 | 90020683 |
| chr15 | 90047167 | 90048117 |
| chr15 | 90062979 | 90064087 |
| chr15 | 90066196 | 90067229 |
| chr15 | 89900492 | 89901299 |
| chr15 | 89901737 | 89902797 |
| chr15 | 89904404 | 89905784 |
| chr15 | 89907007 | 89907928 |
| chr15 | 89911693 | 89912552 |
| chr15 | 89919919 | 89923815 |
| chr15 | 89956733 | 89958207 |
| chr15 | 89962175 | 89963434 |
| chr15 | 89973881 | 89974016 |
| chr15 | 89974103 | 89974249 |
| chr15 | 90066196 | 90067229 |
| chr15 | 90086049 | 90087546 |
| chr15 | 90091131 | 90091969 |
| chr15 | 90086668 | 90087095 |
| chr15 | 90118474 | 90118756 |
| chr15 | 90119137 | 90119417 |
| chr15 | 90174004 | 90177564 |
| chr15 | 90215771 | 90216565 |
| chr15 | 90233762 | 90234567 |
| chr15 | 90295101 | 90295314 |
| chr15 | 90303834 | 90304762 |
| chr15 | 90309568 | 90310292 |
| chr15 | 90313035 | 90313231 |
| chr15 | 90380165 | 90381352 |
| chr15 | 90448665 | 90449810 |
| chr15 | 90588901 | 90590475 |
| chr15 | 90630555 | 90630898 |
| chr15 | 90647507 | 90648481 |
| chr15 | 90703710 | 90705120 |
| chr15 | 90708315 | 90709877 |
| chr15 | 90700864 | 90702033 |
| chr15 | 90701610 | 90701819 |
| chr15 | 90727017 | 90728411 |

|       |          |          |
|-------|----------|----------|
| chr15 | 90770969 | 90771973 |
| chr15 | 90776015 | 90778300 |
| chr15 | 90922139 | 90923090 |
| chr15 | 90955877 | 90956510 |
| chr15 | 91022019 | 91023610 |
| chr15 | 91260817 | 91261137 |
| chr15 | 91411332 | 91412779 |
| chr15 | 91445846 | 91447126 |
| chr15 | 91474675 | 91476535 |
| chr15 | 91598193 | 91598327 |
| chr15 | 91672455 | 91673419 |
| chr15 | 91782224 | 91783044 |
| chr15 | 91785630 | 91786563 |
| chr15 | 91818617 | 91820143 |
| chr15 | 91832444 | 91833385 |
| chr15 | 91785635 | 91785835 |
| chr15 | 91897711 | 91898793 |
| chr15 | 91973825 | 91975272 |
| chr15 | 91987250 | 91987606 |
| chr15 | 92036357 | 92037140 |
| chr15 | 92079803 | 92080894 |
| chr15 | 92088493 | 92090000 |
| chr15 | 92098463 | 92099490 |
| chr15 | 92108939 | 92109867 |
| chr15 | 92111605 | 92112551 |
| chr15 | 92113362 | 92114804 |
| chr15 | 92181746 | 92182687 |
| chr15 | 92298743 | 92299662 |
| chr15 | 92305163 | 92306117 |
| chr15 | 92395759 | 92397227 |
| chr15 | 92445129 | 92446090 |
| chr15 | 92467776 | 92468673 |
| chr15 | 92485907 | 92486678 |
| chr15 | 92496348 | 92497098 |
| chr15 | 92518383 | 92519546 |
| chr15 | 92549472 | 92550308 |
| chr15 | 92645776 | 92646683 |
| chr15 | 92356422 | 92359087 |
| chr15 | 92552687 | 92553479 |
| chr15 | 92357745 | 92357866 |
| chr15 | 92730921 | 92733371 |
| chr15 | 92732807 | 92733010 |
| chr15 | 92924175 | 92925475 |

|       |          |          |
|-------|----------|----------|
| chr15 | 92930396 | 92931804 |
| chr15 | 92933090 | 92933986 |
| chr15 | 92934575 | 92935704 |
| chr15 | 92942452 | 92943343 |
| chr15 | 92999583 | 93000548 |
| chr15 | 93019750 | 93020724 |
| chr15 | 93033086 | 93034419 |
| chr15 | 93011814 | 93012990 |
| chr15 | 93087846 | 93088709 |
| chr15 | 93159647 | 93161596 |
| chr15 | 93181307 | 93182329 |
| chr15 | 93187666 | 93189433 |
| chr15 | 93193795 | 93194789 |
| chr15 | 93231433 | 93232842 |
| chr15 | 93252320 | 93253173 |
| chr15 | 93126075 | 93127816 |
| chr15 | 93257333 | 93258563 |
| chr15 | 93257724 | 93257827 |
| chr15 | 93413252 | 93413532 |
| chr15 | 93413397 | 93413536 |
| chr15 | 93424989 | 93425292 |
| chr15 | 93447201 | 93448517 |
| chr15 | 93615928 | 93617205 |
| chr15 | 93630607 | 93632191 |
| chr15 | 93714563 | 93715533 |
| chr15 | 93953570 | 93955179 |
| chr15 | 93957042 | 93957864 |
| chr15 | 93970784 | 93971934 |
| chr15 | 93957042 | 93957134 |
| chr15 | 94227092 | 94227933 |
| chr15 | 94491117 | 94492022 |
| chr15 | 94530989 | 94531955 |
| chr15 | 94619138 | 94619166 |
| chr15 | 95097931 | 95099222 |
| chr15 | 95119366 | 95120449 |
| chr15 | 95167610 | 95167861 |
| chr15 | 95335146 | 95335690 |
| chr15 | 95373598 | 95374280 |
| chr15 | 95384400 | 95385028 |
| chr15 | 95423671 | 95424374 |
| chr15 | 95425667 | 95426353 |
| chr15 | 95452560 | 95454152 |
| chr15 | 95616963 | 95617785 |

|       |          |          |
|-------|----------|----------|
| chr15 | 95675728 | 95676234 |
| chr15 | 95803323 | 95803582 |
| chr15 | 95836004 | 95837186 |
| chr15 | 95859014 | 95861452 |
| chr15 | 96099779 | 96101070 |
| chr15 | 96101848 | 96103677 |
| chr15 | 96122279 | 96122988 |
| chr15 | 96275352 | 96276218 |
| chr15 | 96286726 | 96287869 |
| chr15 | 96413427 | 96414897 |
| chr15 | 96415673 | 96417156 |
| chr15 | 96418063 | 96419613 |
| chr15 | 96429855 | 96433263 |
| chr15 | 96436768 | 96437757 |
| chr15 | 96444611 | 96445545 |
| chr15 | 96446811 | 96448672 |
| chr15 | 96450980 | 96451838 |
| chr15 | 96454340 | 96456817 |
| chr15 | 96473580 | 96474925 |
| chr15 | 96475541 | 96476463 |
| chr15 | 96478228 | 96478979 |
| chr15 | 96480540 | 96481789 |
| chr15 | 96494269 | 96497170 |
| chr15 | 96501315 | 96501874 |
| chr15 | 96510591 | 96511671 |
| chr15 | 96525109 | 96526283 |
| chr15 | 96530272 | 96531071 |
| chr15 | 96538366 | 96539847 |
| chr15 | 96518012 | 96519104 |
| chr15 | 96569466 | 96570601 |
| chr15 | 96586053 | 96586956 |
| chr15 | 96591937 | 96592989 |
| chr15 | 96595355 | 96597451 |
| chr15 | 96583654 | 96584880 |
| chr15 | 96645444 | 96646414 |
| chr15 | 96650880 | 96651818 |
| chr15 | 96829254 | 96830329 |
| chr15 | 96866886 | 96867848 |
| chr15 | 96868569 | 96870099 |
| chr15 | 96871761 | 96872563 |
| chr15 | 96873713 | 96878381 |
| chr15 | 96879156 | 96880725 |
| chr15 | 96882081 | 96884208 |

|       |          |          |
|-------|----------|----------|
| chr15 | 96897337 | 96898664 |
| chr15 | 96899032 | 96900931 |
| chr15 | 96928213 | 96929212 |
| chr15 | 96969090 | 96970213 |
| chr15 | 96991826 | 96993161 |
| chr15 | 96869147 | 96869364 |
| chr15 | 96877886 | 96878010 |
| chr15 | 96897897 | 96898664 |
| chr15 | 96899032 | 96900931 |
| chr15 | 96970114 | 96970213 |
| chr15 | 97005805 | 97006491 |
| chr15 | 97109151 | 97110172 |
| chr15 | 97287815 | 97288627 |
| chr15 | 97725776 | 97725951 |
| chr15 | 98451547 | 98452541 |
| chr15 | 98522660 | 98523304 |
| chr15 | 98529459 | 98530779 |
| chr15 | 98608831 | 98609702 |
| chr15 | 98652029 | 98652770 |
| chr15 | 98688246 | 98689079 |
| chr15 | 98739755 | 98740670 |
| chr15 | 98742224 | 98743385 |
| chr15 | 98847620 | 98848879 |
| chr15 | 98873702 | 98874622 |
| chr15 | 98991031 | 98991781 |
| chr15 | 98992865 | 98993907 |
| chr15 | 99019227 | 99020897 |
| chr15 | 99023612 | 99024488 |
| chr15 | 99026860 | 99027659 |
| chr15 | 99088490 | 99089369 |
| chr15 | 99134608 | 99134832 |
| chr15 | 99140938 | 99141367 |
| chr15 | 99204100 | 99204991 |
| chr15 | 99210545 | 99211406 |
| chr15 | 99270240 | 99271284 |
| chr15 | 99322846 | 99323046 |
| chr15 | 99322960 | 99323063 |
| chr15 | 99342568 | 99343611 |
| chr15 | 99372639 | 99377433 |
| chr15 | 99409922 | 99412429 |
| chr15 | 99442559 | 99443488 |
| chr15 | 99457847 | 99459263 |
| chr15 | 99504486 | 99504822 |

|       |           |           |
|-------|-----------|-----------|
| chr15 | 99504969  | 99505079  |
| chr15 | 99505427  | 99505931  |
| chr15 | 99592190  | 99593227  |
| chr15 | 99602202  | 99603144  |
| chr15 | 99609562  | 99610569  |
| chr15 | 99626011  | 99627552  |
| chr15 | 99644820  | 99646105  |
| chr15 | 99646780  | 99647510  |
| chr15 | 99985874  | 99986823  |
| chr15 | 100003868 | 100005249 |
| chr15 | 100106338 | 100107889 |
| chr15 | 100272279 | 100273945 |
| chr15 | 100442593 | 100443450 |
| chr15 | 100480709 | 100482648 |
| chr15 | 100522301 | 100523254 |
| chr15 | 100583607 | 100584890 |
| chr15 | 100642895 | 100643782 |
| chr15 | 100657353 | 100658180 |
| chr15 | 100659318 | 100663205 |
| chr15 | 100687964 | 100689437 |
| chr15 | 100787064 | 100788110 |
| chr15 | 100712282 | 100715724 |
| chr15 | 100813173 | 100814159 |
| chr15 | 100830882 | 100831829 |
| chr15 | 100871719 | 100872652 |
| chr15 | 100881683 | 100882524 |
| chr15 | 101003395 | 101005248 |
| chr15 | 101013329 | 101014611 |
| chr15 | 101004592 | 101004803 |
| chr15 | 101068236 | 101068864 |
| chr15 | 101174997 | 101176259 |
| chr15 | 101181730 | 101182046 |
| chr15 | 101233467 | 101234360 |
| chr15 | 101255792 | 101256810 |
| chr15 | 101261415 | 101262319 |
| chr15 | 101265329 | 101266010 |
| chr15 | 101328117 | 101328995 |
| chr15 | 101344041 | 101345011 |
| chr15 | 101347215 | 101350472 |
| chr15 | 101354841 | 101355615 |
| chr15 | 101384917 | 101385720 |
| chr15 | 101388975 | 101390139 |
| chr15 | 101413413 | 101414326 |

|       |           |           |
|-------|-----------|-----------|
| chr15 | 101431330 | 101432413 |
| chr15 | 101440511 | 101441491 |
| chr15 | 101470825 | 101472293 |
| chr15 | 101516791 | 101518352 |
| chr15 | 101528787 | 101529743 |
| chr15 | 101548208 | 101549529 |
| chr15 | 101564891 | 101566807 |
| chr15 | 101549025 | 101549240 |
| chr15 | 101631611 | 101632774 |
| chr15 | 101633149 | 101634461 |
| chr15 | 101660603 | 101661438 |
| chr15 | 101662735 | 101663463 |
| chr15 | 101690508 | 101691605 |
| chr15 | 101703987 | 101705112 |
| chr15 | 101705686 | 101706689 |
| chr15 | 101629597 | 101630780 |
| chr15 | 101678434 | 101679354 |
| chr15 | 101632117 | 101632431 |
| chr15 | 101764210 | 101765343 |
| chr15 | 101767617 | 101769293 |
| chr15 | 101787871 | 101789229 |
| chr15 | 101816415 | 101817541 |
| chr15 | 101791566 | 101793910 |
| chr15 | 101817130 | 101817234 |
| chr15 | 101828937 | 101829351 |
| chr15 | 101834555 | 101836057 |
| chr15 | 101855257 | 101856423 |
| chr15 | 101896809 | 101897750 |
| chr15 | 101919994 | 101920801 |
| chr15 | 101874961 | 101876045 |
| chr15 | 101897212 | 101897668 |
| chr15 | 102028626 | 102030772 |
| chr15 | 102031612 | 102033310 |
| chr15 | 102041336 | 102042815 |
| chr15 | 102043912 | 102044701 |
| chr15 | 102053459 | 102054413 |
| chr15 | 102057283 | 102059326 |
| chr15 | 102062507 | 102064659 |
| chr15 | 102067451 | 102068696 |
| chr15 | 102079358 | 102083103 |
| chr15 | 102083635 | 102084620 |
| chr15 | 102085417 | 102087433 |
| chr15 | 102091753 | 102092851 |



|       |           |           |
|-------|-----------|-----------|
| chr15 | 102093731 | 102095222 |
| chr15 | 102098130 | 102099952 |
| chr15 | 102105674 | 102107658 |
| chr15 | 102112721 | 102114068 |
| chr15 | 102119189 | 102120500 |
| chr15 | 102123989 | 102124789 |
| chr15 | 102126095 | 102127233 |
| chr15 | 102038493 | 102039792 |
| chr15 | 102121322 | 102122132 |
| chr15 | 102064081 | 102064287 |
| chr15 | 102139983 | 102140977 |
| chr15 | 102149631 | 102150478 |
| chr15 | 102157194 | 102158080 |
| chr15 | 102153594 | 102155445 |
| chr15 | 102176733 | 102177500 |
| chr15 | 102265239 | 102265345 |
| chr15 | 102265243 | 102265470 |
| chr15 | 102271377 | 102272430 |
| chr15 | 102356396 | 102358029 |
| chr16 | 121221    | 122251    |
| chr16 | 717410    | 718372    |
| chr16 | 770991    | 772036    |
| chr16 | 790234    | 791607    |
| chr16 | 1075008   | 1075963   |
| chr16 | 1134446   | 1136362   |
| chr16 | 2301467   | 2302333   |
| chr16 | 2301873   | 2302333   |
| chr16 | 2802594   | 2803735   |
| chr16 | 2904160   | 2905360   |
| chr16 | 2906986   | 2908743   |
| chr16 | 2910491   | 2912026   |
| chr16 | 2917942   | 2918846   |
| chr16 | 3162014   | 3163226   |
| chr16 | 3198911   | 3201087   |
| chr16 | 3202367   | 3203231   |
| chr16 | 3224127   | 3225534   |
| chr16 | 3233186   | 3234191   |
| chr16 | 3240796   | 3242121   |
| chr16 | 3255546   | 3256846   |
| chr16 | 3332480   | 3333945   |
| chr16 | 3335510   | 3337121   |
| chr16 | 3338106   | 3345217   |
| chr16 | 3350294   | 3351303   |

|       |          |          |
|-------|----------|----------|
| chr16 | 3351094  | 3351310  |
| chr16 | 3355245  | 3355510  |
| chr16 | 3439959  | 3440078  |
| chr16 | 3458108  | 3459377  |
| chr16 | 4359069  | 4360078  |
| chr16 | 4364419  | 4365552  |
| chr16 | 4359069  | 4360078  |
| chr16 | 4364419  | 4365552  |
| chr16 | 4364419  | 4364437  |
| chr16 | 4364547  | 4364836  |
| chr16 | 4422880  | 4424189  |
| chr16 | 4589713  | 4590390  |
| chr16 | 4675025  | 4675945  |
| chr16 | 4675025  | 4675154  |
| chr16 | 4675707  | 4675945  |
| chr16 | 4986280  | 4987638  |
| chr16 | 9142093  | 9142293  |
| chr16 | 10321913 | 10323003 |
| chr16 | 10436956 | 10437480 |
| chr16 | 10480259 | 10480449 |
| chr16 | 10687961 | 10689317 |
| chr16 | 10688461 | 10688761 |
| chr16 | 10710714 | 10712381 |
| chr16 | 11295815 | 11296733 |
| chr16 | 11312012 | 11313302 |
| chr16 | 11312802 | 11313002 |
| chr16 | 11441030 | 11441902 |
| chr16 | 11578079 | 11578962 |
| chr16 | 12896837 | 12897689 |
| chr16 | 12992930 | 12994134 |
| chr16 | 14379911 | 14380078 |
| chr16 | 14383077 | 14384214 |
| chr16 | 15050781 | 15051444 |
| chr16 | 16252641 | 16253443 |
| chr16 | 19019748 | 19019933 |
| chr16 | 19124752 | 19125628 |
| chr16 | 20911602 | 20913118 |
| chr16 | 21536367 | 21537702 |
| chr16 | 21576495 | 21577478 |
| chr16 | 22199495 | 22200587 |
| chr16 | 22199583 | 22199838 |
| chr16 | 22309417 | 22309539 |
| chr16 | 22309438 | 22309539 |

|       |          |          |
|-------|----------|----------|
| chr16 | 22632230 | 22633599 |
| chr16 | 22636706 | 22637681 |
| chr16 | 22651834 | 22652825 |
| chr16 | 22656835 | 22658137 |
| chr16 | 22661057 | 22661812 |
| chr16 | 22658967 | 22660414 |
| chr16 | 22657310 | 22657546 |
| chr16 | 22671502 | 22672345 |
| chr16 | 22673595 | 22674000 |
| chr16 | 22684218 | 22685313 |
| chr16 | 22685668 | 22686470 |
| chr16 | 22687506 | 22690357 |
| chr16 | 22994485 | 22995810 |
| chr16 | 27374828 | 27376438 |
| chr16 | 27432796 | 27434553 |
| chr16 | 27966373 | 27967359 |
| chr16 | 29910696 | 29911422 |
| chr16 | 29990743 | 29992188 |
| chr16 | 30005860 | 30007620 |
| chr16 | 30032349 | 30033311 |
| chr16 | 30071851 | 30072738 |
| chr16 | 30088810 | 30089809 |
| chr16 | 30103583 | 30104730 |
| chr16 | 30107299 | 30109870 |
| chr16 | 30407120 | 30407423 |
| chr16 | 30661478 | 30662710 |
| chr16 | 30773323 | 30779033 |
| chr16 | 30781128 | 30781343 |
| chr16 | 30782864 | 30783930 |
| chr16 | 30784676 | 30786976 |
| chr16 | 30816593 | 30816817 |
| chr16 | 30817237 | 30817779 |
| chr16 | 31084497 | 31085681 |
| chr16 | 31519094 | 31520438 |
| chr16 | 31886378 | 31887967 |
| chr16 | 31890768 | 31894999 |
| chr16 | 31895378 | 31896074 |
| chr16 | 32533064 | 32533298 |
| chr16 | 32557581 | 32558082 |
| chr16 | 32560038 | 32560148 |
| chr16 | 32560108 | 32561124 |
| chr16 | 33241097 | 33241250 |
| chr16 | 33293818 | 33294126 |

|       |          |          |
|-------|----------|----------|
| chr16 | 33865740 | 33868268 |
| chr16 | 33873389 | 33874797 |
| chr16 | 33876310 | 33877514 |
| chr16 | 33886303 | 33888148 |
| chr16 | 33903217 | 33904521 |
| chr16 | 33915694 | 33917566 |
| chr16 | 33918311 | 33920367 |
| chr16 | 33944250 | 33945208 |
| chr16 | 33966213 | 33977536 |
| chr16 | 33977836 | 33979279 |
| chr16 | 33982012 | 33986262 |
| chr16 | 33986559 | 33988340 |
| chr16 | 33991679 | 33992406 |
| chr16 | 33992641 | 33994662 |
| chr16 | 33997947 | 33998977 |
| chr16 | 33999917 | 34001397 |
| chr16 | 34001870 | 34002855 |
| chr16 | 34004915 | 34006740 |
| chr16 | 34008908 | 34010059 |
| chr16 | 34010429 | 34013014 |
| chr16 | 34020983 | 34023129 |
| chr16 | 33879098 | 33882288 |
| chr16 | 33996170 | 33997280 |
| chr16 | 33879547 | 33879803 |
| chr16 | 33881233 | 33881483 |
| chr16 | 33915718 | 33915950 |
| chr16 | 33919224 | 33919893 |
| chr16 | 33944250 | 33945208 |
| chr16 | 33966213 | 33967080 |
| chr16 | 33968029 | 33968223 |
| chr16 | 33968461 | 33968684 |
| chr16 | 33970986 | 33971299 |
| chr16 | 33971431 | 33971657 |
| chr16 | 33972366 | 33972579 |
| chr16 | 33972811 | 33973116 |
| chr16 | 33973440 | 33976265 |
| chr16 | 33976558 | 33976699 |
| chr16 | 33976785 | 33976990 |
| chr16 | 33982035 | 33982160 |
| chr16 | 33982831 | 33983065 |
| chr16 | 33983135 | 33983372 |
| chr16 | 33983655 | 33983796 |
| chr16 | 33984025 | 33984321 |

|       |          |          |
|-------|----------|----------|
| chr16 | 33985155 | 33985296 |
| chr16 | 33985159 | 33985396 |
| chr16 | 33985606 | 33985725 |
| chr16 | 33987224 | 33987732 |
| chr16 | 34002080 | 34002681 |
| chr16 | 34002084 | 34002281 |
| chr16 | 34021434 | 34021769 |
| chr16 | 34021792 | 34021911 |
| chr16 | 34022563 | 34022860 |
| chr16 | 34185076 | 34187216 |
| chr16 | 34194830 | 34195655 |
| chr16 | 34192479 | 34193750 |
| chr16 | 34666307 | 34666844 |
| chr16 | 46385638 | 46397470 |
| chr16 | 46413141 | 46414429 |
| chr16 | 46416417 | 46418922 |
| chr16 | 46419307 | 46421581 |
| chr16 | 46424527 | 46430489 |
| chr16 | 46430860 | 46432087 |
| chr16 | 46432427 | 46433417 |
| chr16 | 46434152 | 46436280 |
| chr16 | 46437176 | 46438193 |
| chr16 | 46443307 | 46444748 |
| chr16 | 46454525 | 46455725 |
| chr16 | 46415010 | 46416195 |
| chr16 | 46398239 | 46412933 |
| chr16 | 50475235 | 50476742 |
| chr16 | 67313181 | 67314156 |
| chr16 | 67515110 | 67515937 |
| chr16 | 67554602 | 67556046 |
| chr16 | 67686495 | 67687271 |
| chr16 | 67694135 | 67695123 |
| chr16 | 67710093 | 67711074 |
| chr16 | 67876326 | 67876395 |
| chr16 | 67981811 | 67982833 |
| chr16 | 67995068 | 67996153 |
| chr16 | 68267485 | 68269155 |
| chr16 | 68270866 | 68272397 |
| chr16 | 68477964 | 68478708 |
| chr16 | 68584029 | 68585446 |
| chr16 | 68586091 | 68607821 |
| chr16 | 68692172 | 68692818 |
| chr16 | 68740930 | 68741966 |

|       |          |          |
|-------|----------|----------|
| chr16 | 69345053 | 69345771 |
| chr16 | 69760047 | 69761049 |
| chr16 | 69775243 | 69776497 |
| chr16 | 69775243 | 69776497 |
| chr16 | 70194120 | 70194728 |
| chr16 | 70487693 | 70488657 |
| chr16 | 71232121 | 71233205 |
| chr16 | 71259556 | 71261103 |
| chr16 | 71321979 | 71324123 |
| chr16 | 71485175 | 71486485 |
| chr16 | 71501223 | 71502317 |
| chr16 | 71517854 | 71518864 |
| chr16 | 71593827 | 71595163 |
| chr16 | 71678921 | 71679902 |
| chr16 | 71479292 | 71484568 |
| chr16 | 71928618 | 71929801 |
| chr16 | 71971917 | 71973321 |
| chr16 | 72958517 | 72959801 |
| chr16 | 73043917 | 73044792 |
| chr16 | 73049025 | 73050321 |
| chr16 | 73053212 | 73054332 |
| chr16 | 73080903 | 73082474 |
| chr16 | 73091809 | 73092869 |
| chr16 | 73103964 | 73105266 |
| chr16 | 73087906 | 73089411 |
| chr16 | 73129830 | 73130496 |
| chr16 | 73178472 | 73178710 |
| chr16 | 73179017 | 73179313 |
| chr16 | 73238788 | 73238812 |
| chr16 | 73250082 | 73250308 |
| chr16 | 74641284 | 74642036 |
| chr16 | 74777473 | 74778751 |
| chr16 | 74743279 | 74743825 |
| chr16 | 74759531 | 74761407 |
| chr16 | 74807553 | 74808333 |
| chr16 | 74809014 | 74809310 |
| chr16 | 75072306 | 75072445 |
| chr16 | 75092315 | 75093195 |
| chr16 | 75095612 | 75096677 |
| chr16 | 75087841 | 75089390 |
| chr16 | 75130341 | 75131429 |
| chr16 | 75133157 | 75134331 |
| chr16 | 75141547 | 75143212 |

|       |          |          |
|-------|----------|----------|
| chr16 | 75144053 | 75145773 |
| chr16 | 75150033 | 75151194 |
| chr16 | 75227116 | 75227119 |
| chr16 | 75278761 | 75279877 |
| chr16 | 75278761 | 75279877 |
| chr16 | 75467827 | 75467915 |
| chr16 | 77636168 | 77638805 |
| chr16 | 77649606 | 77650662 |
| chr16 | 77821956 | 77822886 |
| chr16 | 78029156 | 78030972 |
| chr16 | 78132969 | 78133543 |
| chr16 | 79229230 | 79230296 |
| chr16 | 79404365 | 79405200 |
| chr16 | 79673266 | 79674295 |
| chr16 | 79995694 | 79996788 |
| chr16 | 80060972 | 80061956 |
| chr16 | 80130848 | 80131731 |
| chr16 | 80479936 | 80480789 |
| chr16 | 80573926 | 80575137 |
| chr16 | 80573926 | 80574006 |
| chr16 | 80574381 | 80575137 |
| chr16 | 80647140 | 80650543 |
| chr16 | 80653310 | 80654634 |
| chr16 | 80641139 | 80642705 |
| chr16 | 80846264 | 80847400 |
| chr16 | 80849343 | 80850877 |
| chr16 | 81174360 | 81175448 |
| chr16 | 81177198 | 81178275 |
| chr16 | 81208145 | 81209886 |
| chr16 | 81632033 | 81633366 |
| chr16 | 81798725 | 81798868 |
| chr16 | 82002907 | 82003492 |
| chr16 | 82042096 | 82043579 |
| chr16 | 82044845 | 82046524 |
| chr16 | 82203577 | 82204716 |
| chr16 | 82356524 | 82358792 |
| chr16 | 82359878 | 82360663 |
| chr16 | 82362873 | 82365751 |
| chr16 | 82374966 | 82376169 |
| chr16 | 82363937 | 82364588 |
| chr16 | 82365090 | 82365307 |
| chr16 | 82376065 | 82376165 |
| chr16 | 83836299 | 83836520 |

|       |          |          |
|-------|----------|----------|
| chr16 | 83923209 | 83924164 |
| chr16 | 83925046 | 83926290 |
| chr16 | 83931503 | 83932247 |
| chr16 | 83959691 | 83961350 |
| chr16 | 83986187 | 83987609 |
| chr16 | 84010289 | 84011242 |
| chr16 | 84011496 | 84013986 |
| chr16 | 84051810 | 84053252 |
| chr16 | 84056030 | 84056982 |
| chr16 | 84130170 | 84130854 |
| chr16 | 84153836 | 84154047 |
| chr16 | 84359898 | 84360790 |
| chr16 | 84400352 | 84402408 |
| chr16 | 84418597 | 84420033 |
| chr16 | 84429810 | 84431265 |
| chr16 | 84527891 | 84528358 |
| chr16 | 84563095 | 84564023 |
| chr16 | 84650650 | 84652102 |
| chr16 | 84681932 | 84683279 |
| chr16 | 84759356 | 84760205 |
| chr16 | 84772194 | 84772378 |
| chr16 | 84892898 | 84894229 |
| chr16 | 84907558 | 84909092 |
| chr16 | 84884315 | 84885943 |
| chr16 | 84958535 | 84959505 |
| chr16 | 85027743 | 85029122 |
| chr16 | 85034044 | 85034970 |
| chr16 | 85032746 | 85033647 |
| chr16 | 85148419 | 85149285 |
| chr16 | 85159414 | 85161000 |
| chr16 | 85177081 | 85178602 |
| chr16 | 85286739 | 85287643 |
| chr16 | 85339541 | 85340580 |
| chr16 | 85382707 | 85385195 |
| chr16 | 85398317 | 85399543 |
| chr16 | 85424206 | 85425459 |
| chr16 | 85179121 | 85181572 |
| chr16 | 85455528 | 85457124 |
| chr16 | 85470530 | 85471637 |
| chr16 | 85475741 | 85476581 |
| chr16 | 85478180 | 85479358 |
| chr16 | 85482108 | 85483463 |
| chr16 | 85491743 | 85493183 |



|       |          |          |
|-------|----------|----------|
| chr16 | 85496275 | 85497879 |
| chr16 | 85505061 | 85506614 |
| chr16 | 85525105 | 85527045 |
| chr16 | 85547866 | 85550025 |
| chr16 | 85553903 | 85555638 |
| chr16 | 85558305 | 85559374 |
| chr16 | 85587103 | 85588712 |
| chr16 | 85603023 | 85605147 |
| chr16 | 85636050 | 85637192 |
| chr16 | 85645051 | 85649617 |
| chr16 | 85673066 | 85674033 |
| chr16 | 85675562 | 85676717 |
| chr16 | 85678405 | 85679816 |
| chr16 | 85811215 | 85812360 |
| chr16 | 85832605 | 85833873 |
| chr16 | 85854723 | 85855708 |
| chr16 | 85924510 | 85926400 |
| chr16 | 85971462 | 85972319 |
| chr16 | 86056859 | 86058166 |
| chr16 | 86082959 | 86084098 |
| chr16 | 85496275 | 85497861 |
| chr16 | 85548223 | 85548324 |
| chr16 | 85548333 | 85548572 |
| chr16 | 86226767 | 86228115 |
| chr16 | 86227915 | 86228115 |
| chr16 | 86431678 | 86432595 |
| chr16 | 86442460 | 86443436 |
| chr16 | 86375759 | 86376799 |
| chr16 | 86480436 | 86481401 |
| chr16 | 86494008 | 86495575 |
| chr16 | 86516959 | 86519081 |
| chr16 | 86518425 | 86518596 |
| chr16 | 86658245 | 86659189 |
| chr16 | 86681313 | 86683337 |
| chr16 | 86686526 | 86687404 |
| chr16 | 86689655 | 86690759 |
| chr16 | 86681833 | 86681941 |
| chr16 | 86855390 | 86856371 |
| chr16 | 86878063 | 86879161 |
| chr16 | 86901867 | 86902789 |
| chr16 | 86954349 | 86957329 |
| chr16 | 86972823 | 86974205 |
| chr16 | 86975441 | 86976697 |

|       |          |          |
|-------|----------|----------|
| chr16 | 87007499 | 87008484 |
| chr16 | 87120188 | 87121079 |
| chr16 | 87222843 | 87224797 |
| chr16 | 87273859 | 87275831 |
| chr16 | 87113558 | 87116575 |
| chr16 | 87337914 | 87338969 |
| chr16 | 87339201 | 87340173 |
| chr16 | 87349572 | 87352000 |
| chr16 | 87417425 | 87417668 |
| chr16 | 87417440 | 87417968 |
| chr16 | 87566081 | 87567548 |
| chr16 | 87569679 | 87571423 |
| chr16 | 87614932 | 87616143 |
| chr16 | 87700916 | 87702026 |
| chr16 | 87728258 | 87729004 |
| chr16 | 87604351 | 87605607 |
| chr16 | 87881427 | 87882410 |
| chr16 | 87886649 | 87889190 |
| chr16 | 87848920 | 87852046 |
| chr16 | 87888471 | 87888674 |
| chr16 | 87978953 | 87980137 |
| chr16 | 88004791 | 88005425 |
| chr16 | 88129817 | 88131119 |
| chr16 | 88319537 | 88322699 |
| chr16 | 88464780 | 88465917 |
| chr16 | 88520464 | 88521271 |
| chr16 | 88606983 | 88610921 |
| chr16 | 88700939 | 88701809 |
| chr16 | 88772340 | 88773537 |
| chr16 | 88751653 | 88752897 |
| chr16 | 88803618 | 88804518 |
| chr16 | 88814273 | 88815189 |
| chr16 | 88821304 | 88822527 |
| chr16 | 88824297 | 88825314 |
| chr16 | 88826976 | 88828624 |
| chr16 | 88829762 | 88832122 |
| chr16 | 88836870 | 88837817 |
| chr16 | 88839167 | 88840070 |
| chr16 | 88875076 | 88876395 |
| chr16 | 88876771 | 88879613 |
| chr16 | 88986850 | 88988098 |
| chr16 | 88992455 | 88996280 |
| chr16 | 89006620 | 89007585 |

|       |          |          |
|-------|----------|----------|
| chr16 | 89103242 | 89104221 |
| chr16 | 89115152 | 89116056 |
| chr16 | 89119665 | 89120581 |
| chr16 | 89164064 | 89164883 |
| chr16 | 89006620 | 89007585 |
| chr16 | 89216548 | 89216733 |
| chr16 | 89220434 | 89222125 |
| chr16 | 89299750 | 89301357 |
| chr16 | 89291826 | 89299335 |
| chr16 | 89449020 | 89450244 |
| chr16 | 89543068 | 89543283 |
| chr16 | 89631674 | 89633098 |
| chr16 | 89706267 | 89707072 |
| chr16 | 89766262 | 89767614 |
| chr16 | 89750894 | 89753426 |
| chr16 | 89752157 | 89752372 |
| chr16 | 89788768 | 89789526 |
| chr16 | 89971799 | 89973685 |
| chr16 | 89975879 | 89977294 |
| chr16 | 89983746 | 89984959 |
| chr16 | 89987712 | 89989958 |
| chr16 | 89976492 | 89976710 |
| chr16 | 89988515 | 89988760 |
| chr16 | 90038470 | 90039777 |
| chr16 | 90061611 | 90061825 |
| chr16 | 90062386 | 90062496 |
| chr16 | 90084388 | 90085571 |
| chr16 | 90086800 | 90087287 |
| chr16 | 90110283 | 90111376 |
| chr16 | 90113324 | 90114424 |
| chr17 | 4981053  | 4981575  |
| chr17 | 4981141  | 4981244  |
| chr17 | 4994423  | 4995220  |
| chr17 | 4994435  | 4995761  |
| chr17 | 5000345  | 5000465  |
| chr17 | 5712708  | 5713885  |
| chr17 | 9118515  | 9119465  |
| chr17 | 14789731 | 14790299 |
| chr17 | 17327040 | 17329057 |
| chr17 | 17585572 | 17586329 |
| chr17 | 21211965 | 21212858 |
| chr17 | 21230913 | 21233251 |
| chr17 | 21236890 | 21238030 |

|       |          |          |
|-------|----------|----------|
| chr17 | 21307015 | 21307823 |
| chr17 | 21550055 | 21550172 |
| chr17 | 21550339 | 21550685 |
| chr17 | 22251393 | 22251752 |
| chr17 | 22251965 | 22252330 |
| chr17 | 22252702 | 22252940 |
| chr17 | 22253152 | 22253342 |
| chr17 | 22255404 | 22255776 |
| chr17 | 22259989 | 22260420 |
| chr17 | 22259993 | 22260204 |
| chr17 | 22261069 | 22261296 |
| chr17 | 22261450 | 22261711 |
| chr17 | 25263267 | 25268372 |
| chr17 | 25310281 | 25311209 |
| chr17 | 25263267 | 25268372 |
| chr17 | 25568327 | 25569087 |
| chr17 | 26199954 | 26201457 |
| chr17 | 27224207 | 27225064 |
| chr17 | 27225015 | 27225064 |
| chr17 | 27443748 | 27444487 |
| chr17 | 41381479 | 41382524 |
| chr17 | 41399546 | 41401814 |
| chr17 | 41465708 | 41466826 |
| chr17 | 44999902 | 45000947 |
| chr17 | 45314132 | 45315410 |
| chr17 | 45726500 | 45727450 |
| chr17 | 45726804 | 45727448 |
| chr17 | 45764446 | 45765334 |
| chr17 | 45770449 | 45771221 |
| chr17 | 45775397 | 45776259 |
| chr17 | 45783407 | 45784257 |
| chr17 | 45785070 | 45786025 |
| chr17 | 45787623 | 45790775 |
| chr17 | 45797838 | 45799351 |
| chr17 | 45801556 | 45802461 |
| chr17 | 45835261 | 45835539 |
| chr17 | 45863164 | 45863327 |
| chr17 | 45898511 | 45899975 |
| chr17 | 45917182 | 45918118 |
| chr17 | 45920276 | 45921504 |
| chr17 | 45927459 | 45929114 |
| chr17 | 45960539 | 45963613 |
| chr17 | 45907523 | 45908952 |

|       |          |          |
|-------|----------|----------|
| chr17 | 45940022 | 45941067 |
| chr17 | 45982528 | 45983255 |
| chr17 | 46018636 | 46019736 |
| chr17 | 46018720 | 46018840 |
| chr17 | 46023842 | 46023927 |
| chr17 | 46026058 | 46026261 |
| chr17 | 46032601 | 46033409 |
| chr17 | 46033712 | 46039384 |
| chr17 | 46047576 | 46049007 |
| chr17 | 46057989 | 46058844 |
| chr17 | 46059952 | 46061223 |
| chr17 | 46091135 | 46091252 |
| chr17 | 46092452 | 46092600 |
| chr17 | 46100180 | 46104411 |
| chr17 | 46109207 | 46111404 |
| chr17 | 46114180 | 46115507 |
| chr17 | 46102857 | 46103076 |
| chr17 | 46114429 | 46114533 |
| chr17 | 46115311 | 46115507 |
| chr17 | 46123908 | 46126939 |
| chr17 | 46127775 | 46129892 |
| chr17 | 46130587 | 46132126 |
| chr17 | 46227092 | 46228163 |
| chr17 | 46228619 | 46229606 |
| chr17 | 46360947 | 46361418 |
| chr17 | 46439451 | 46439865 |
| chr17 | 46533757 | 46535253 |
| chr17 | 46534514 | 46534619 |
| chr17 | 46534710 | 46534824 |
| chr17 | 46570161 | 46570824 |
| chr17 | 46576690 | 46578122 |
| chr17 | 47049611 | 47050452 |
| chr17 | 47078653 | 47078770 |
| chr17 | 47079057 | 47079275 |
| chr17 | 47079724 | 47079858 |
| chr17 | 47091400 | 47093336 |
| chr17 | 47159462 | 47159743 |
| chr17 | 47169924 | 47170989 |
| chr17 | 47169455 | 47169547 |
| chr17 | 47209786 | 47210011 |
| chr17 | 47210332 | 47210432 |
| chr17 | 47245158 | 47247865 |
| chr17 | 47304338 | 47305179 |

|       |          |          |
|-------|----------|----------|
| chr17 | 47437783 | 47438738 |
| chr17 | 47517330 | 47518153 |
| chr17 | 47571548 | 47573094 |
| chr17 | 47585201 | 47587986 |
| chr17 | 47590733 | 47591740 |
| chr17 | 47592114 | 47593453 |
| chr17 | 47601107 | 47602210 |
| chr17 | 47571848 | 47571972 |
| chr17 | 47633166 | 47634023 |
| chr17 | 47647369 | 47648907 |
| chr17 | 47652413 | 47654800 |
| chr17 | 47656996 | 47658501 |
| chr17 | 47662565 | 47663651 |
| chr17 | 47643712 | 47644804 |
| chr17 | 47785173 | 47786546 |
| chr17 | 47843936 | 47844816 |
| chr17 | 48045365 | 48046562 |
| chr17 | 48053539 | 48054302 |
| chr17 | 48092381 | 48092815 |
| chr17 | 48171524 | 48172479 |
| chr17 | 48226215 | 48227129 |
| chr17 | 48227981 | 48229483 |
| chr17 | 48394639 | 48395103 |
| chr17 | 48555400 | 48556686 |
| chr17 | 48638087 | 48639121 |
| chr17 | 48737994 | 48739680 |
| chr17 | 48992157 | 48994407 |
| chr17 | 48996438 | 48998062 |
| chr17 | 48999203 | 49001822 |
| chr17 | 49012222 | 49013642 |
| chr17 | 49023366 | 49023965 |
| chr17 | 49024287 | 49024408 |
| chr17 | 49027357 | 49027609 |
| chr17 | 49033837 | 49034910 |
| chr17 | 49448983 | 49449483 |
| chr17 | 49475627 | 49477094 |
| chr17 | 49516303 | 49517784 |
| chr17 | 49684504 | 49686493 |
| chr17 | 49787077 | 49788005 |
| chr17 | 49856906 | 49857832 |
| chr17 | 53294363 | 53295262 |
| chr17 | 53509952 | 53511545 |
| chr17 | 54512040 | 54513058 |

|       |          |          |
|-------|----------|----------|
| chr17 | 54548255 | 54549155 |
| chr17 | 54564615 | 54565824 |
| chr17 | 54629722 | 54632575 |
| chr17 | 54638305 | 54639474 |
| chr17 | 54646368 | 54647136 |
| chr17 | 54670550 | 54672610 |
| chr17 | 54706640 | 54707958 |
| chr17 | 54719918 | 54720796 |
| chr17 | 54729432 | 54730912 |
| chr17 | 54756649 | 54757869 |
| chr17 | 54775667 | 54777578 |
| chr17 | 54780039 | 54781543 |
| chr17 | 54825161 | 54826630 |
| chr17 | 54828563 | 54829534 |
| chr17 | 54839476 | 54841066 |
| chr17 | 54842340 | 54843804 |
| chr17 | 54857122 | 54858418 |
| chr17 | 54888774 | 54889614 |
| chr17 | 54909285 | 54910054 |
| chr17 | 54910934 | 54913206 |
| chr17 | 54989997 | 54990110 |
| chr17 | 55086935 | 55087750 |
| chr17 | 55187774 | 55189110 |
| chr17 | 55198594 | 55199567 |
| chr17 | 55201964 | 55202741 |
| chr17 | 55161688 | 55165828 |
| chr17 | 55320866 | 55321166 |
| chr17 | 55332245 | 55333111 |
| chr17 | 55435308 | 55435824 |
| chr17 | 55452424 | 55452989 |
| chr17 | 55463820 | 55466063 |
| chr17 | 55467872 | 55469424 |
| chr17 | 55470036 | 55472597 |
| chr17 | 55484513 | 55486463 |
| chr17 | 55487302 | 55488479 |
| chr17 | 55517168 | 55519009 |
| chr17 | 55524762 | 55526899 |
| chr17 | 55536235 | 55536772 |
| chr17 | 55544585 | 55545180 |
| chr17 | 55548981 | 55550162 |
| chr17 | 55552634 | 55553390 |
| chr17 | 55557799 | 55559013 |
| chr17 | 55612325 | 55612885 |

|       |          |          |
|-------|----------|----------|
| chr17 | 55627232 | 55628772 |
| chr17 | 55642247 | 55643671 |
| chr17 | 55650432 | 55651371 |
| chr17 | 55680072 | 55682210 |
| chr17 | 55682846 | 55684477 |
| chr17 | 55685739 | 55687350 |
| chr17 | 55689751 | 55690652 |
| chr17 | 55703555 | 55704513 |
| chr17 | 55746090 | 55747189 |
| chr17 | 55790364 | 55791831 |
| chr17 | 55792586 | 55793797 |
| chr17 | 55795792 | 55797192 |
| chr17 | 55816041 | 55817602 |
| chr17 | 55821119 | 55822067 |
| chr17 | 55822738 | 55823913 |
| chr17 | 55827708 | 55829081 |
| chr17 | 55830093 | 55833268 |
| chr17 | 55842135 | 55845184 |
| chr17 | 55850266 | 55851559 |
| chr17 | 55863536 | 55865039 |
| chr17 | 55866942 | 55867789 |
| chr17 | 55802936 | 55804835 |
| chr17 | 55896385 | 55896559 |
| chr17 | 55910042 | 55910920 |
| chr17 | 55926191 | 55927748 |
| chr17 | 55932502 | 55933241 |
| chr17 | 55935022 | 55936015 |
| chr17 | 55937466 | 55940149 |
| chr17 | 55944054 | 55946074 |
| chr17 | 55959179 | 55960000 |
| chr17 | 55950484 | 55951686 |
| chr17 | 55938124 | 55938410 |
| chr17 | 55938524 | 55938740 |
| chr17 | 55968204 | 55971277 |
| chr17 | 55975708 | 55979497 |
| chr17 | 55979936 | 55981639 |
| chr17 | 55982316 | 55983584 |
| chr17 | 55970360 | 55970473 |
| chr17 | 55982878 | 55982995 |
| chr17 | 55989238 | 55989350 |
| chr17 | 55994224 | 55995857 |
| chr17 | 56004258 | 56005540 |
| chr17 | 56006162 | 56007270 |



|       |          |          |
|-------|----------|----------|
| chr17 | 56007551 | 56008549 |
| chr17 | 56018101 | 56018662 |
| chr17 | 56025004 | 56026928 |
| chr17 | 56031194 | 56031383 |
| chr17 | 56033092 | 56033371 |
| chr17 | 56033552 | 56034002 |
| chr17 | 56084411 | 56084513 |
| chr17 | 56085399 | 56085539 |
| chr17 | 56100641 | 56100939 |
| chr17 | 56128368 | 56129331 |
| chr17 | 56132418 | 56133025 |
| chr17 | 56137445 | 56138683 |
| chr17 | 56152535 | 56153641 |
| chr17 | 56156237 | 56157125 |
| chr17 | 56159561 | 56164284 |
| chr17 | 56191473 | 56193021 |
| chr17 | 56193080 | 56193596 |
| chr17 | 56197618 | 56197821 |
| chr17 | 56220962 | 56225266 |
| chr17 | 56237766 | 56238667 |
| chr17 | 56239038 | 56241122 |
| chr17 | 56242345 | 56244745 |
| chr17 | 56249364 | 56250933 |
| chr17 | 56253137 | 56254530 |
| chr17 | 56258624 | 56260003 |
| chr17 | 56279133 | 56280751 |
| chr17 | 56287913 | 56288766 |
| chr17 | 56246249 | 56247269 |
| chr17 | 56296739 | 56296943 |
| chr17 | 56303178 | 56304500 |
| chr17 | 56304747 | 56306414 |
| chr17 | 56319183 | 56320338 |
| chr17 | 56326540 | 56327709 |
| chr17 | 56335993 | 56337220 |
| chr17 | 56347975 | 56349715 |
| chr17 | 56352902 | 56353904 |
| chr17 | 56343998 | 56345235 |
| chr17 | 56376745 | 56377301 |
| chr17 | 56381219 | 56383466 |
| chr17 | 56394697 | 56396319 |
| chr17 | 56397870 | 56398911 |
| chr17 | 56408491 | 56409981 |
| chr17 | 56412699 | 56414328 |

|       |          |          |
|-------|----------|----------|
| chr17 | 56381504 | 56381619 |
| chr17 | 56428847 | 56431450 |
| chr17 | 56468651 | 56469179 |
| chr17 | 56524584 | 56524758 |
| chr17 | 56524871 | 56525020 |
| chr17 | 56590505 | 56592316 |
| chr17 | 56594995 | 56598977 |
| chr17 | 56603759 | 56604836 |
| chr17 | 56609830 | 56611073 |
| chr17 | 56612707 | 56614352 |
| chr17 | 56617389 | 56619129 |
| chr17 | 56642786 | 56643430 |
| chr17 | 56645220 | 56645324 |
| chr17 | 56654997 | 56655690 |
| chr17 | 56694976 | 56696237 |
| chr17 | 56744545 | 56744887 |
| chr17 | 56769677 | 56770192 |
| chr17 | 56831828 | 56835702 |
| chr17 | 57046795 | 57047015 |
| chr17 | 57232448 | 57233044 |
| chr17 | 57406863 | 57407380 |
| chr17 | 57407868 | 57408007 |
| chr17 | 57409694 | 57410596 |
| chr17 | 57411166 | 57411396 |
| chr17 | 57419632 | 57421631 |
| chr17 | 57435660 | 57435861 |
| chr17 | 57455984 | 57457359 |
| chr17 | 57441277 | 57455285 |
| chr17 | 57457561 | 57460242 |
| chr17 | 57492234 | 57494078 |
| chr17 | 57500171 | 57501865 |
| chr17 | 57509810 | 57511001 |
| chr17 | 57512098 | 57513377 |
| chr17 | 57514376 | 57515802 |
| chr17 | 57517597 | 57519887 |
| chr17 | 57504696 | 57509525 |
| chr17 | 57565985 | 57566570 |
| chr17 | 57582105 | 57584809 |
| chr17 | 57599108 | 57599237 |
| chr17 | 57603216 | 57608309 |
| chr17 | 57603984 | 57604582 |
| chr17 | 57641905 | 57643928 |
| chr17 | 57772850 | 57776070 |

|       |          |          |
|-------|----------|----------|
| chr17 | 57924044 | 57924369 |
| chr17 | 57925127 | 57925331 |
| chr17 | 57929073 | 57929698 |
| chr17 | 57962283 | 57962865 |
| chr17 | 58042239 | 58042473 |
| chr17 | 58114602 | 58114805 |
| chr17 | 58157728 | 58158732 |
| chr17 | 58204494 | 58243409 |
| chr17 | 58215522 | 58219519 |
| chr17 | 58220054 | 58220155 |
| chr17 | 58220510 | 58220728 |
| chr17 | 58222586 | 58222709 |
| chr17 | 58225161 | 58230499 |
| chr17 | 58235604 | 58235706 |
| chr17 | 58247403 | 58248409 |
| chr17 | 58248172 | 58248376 |
| chr17 | 58470087 | 58470669 |
| chr17 | 58606175 | 58607465 |
| chr17 | 58648768 | 58649332 |
| chr17 | 58676621 | 58677162 |
| chr17 | 59374192 | 59375489 |
| chr17 | 59381151 | 59381401 |
| chr17 | 59391068 | 59393102 |
| chr17 | 59417225 | 59419165 |
| chr17 | 59421788 | 59422796 |
| chr17 | 59428151 | 59433387 |
| chr17 | 59438942 | 59447111 |
| chr17 | 59461892 | 59486511 |
| chr17 | 59493772 | 59494772 |
| chr17 | 59494142 | 59494775 |
| chr17 | 59496660 | 59497836 |
| chr17 | 59504551 | 59504900 |
| chr17 | 59504566 | 59504902 |
| chr17 | 59516908 | 59558118 |
| chr17 | 59567938 | 59568239 |
| chr17 | 59571955 | 59574099 |
| chr17 | 59657304 | 59657468 |
| chr17 | 60003994 | 60005302 |
| chr17 | 60173181 | 60173723 |
| chr17 | 60186714 | 60186832 |
| chr17 | 60202811 | 60203027 |
| chr17 | 60215371 | 60215515 |
| chr17 | 60215636 | 60215847 |

|       |          |          |
|-------|----------|----------|
| chr17 | 60216081 | 60216237 |
| chr17 | 60397141 | 60397255 |
| chr17 | 60397370 | 60397526 |
| chr17 | 60411269 | 60411380 |
| chr17 | 60443816 | 60444341 |
| chr17 | 60482777 | 60483016 |
| chr17 | 60694157 | 60697515 |
| chr17 | 60697789 | 60701248 |
| chr17 | 60712074 | 60713325 |
| chr17 | 60701675 | 60710896 |
| chr17 | 60697020 | 60697120 |
| chr17 | 60727464 | 60728437 |
| chr17 | 60730897 | 60731039 |
| chr17 | 60731700 | 60731901 |
| chr17 | 60741993 | 60742097 |
| chr17 | 60743974 | 60746696 |
| chr17 | 60747169 | 60750137 |
| chr17 | 60771101 | 60772427 |
| chr17 | 60773693 | 60774227 |
| chr17 | 60773936 | 60774937 |
| chr17 | 60778231 | 60779206 |
| chr17 | 60792108 | 60797919 |
| chr17 | 60779881 | 60791691 |
| chr17 | 60797400 | 60798013 |
| chr17 | 60814382 | 60815406 |
| chr17 | 60825231 | 60825432 |
| chr17 | 60827778 | 60830382 |
| chr17 | 60835742 | 60842018 |
| chr17 | 60843771 | 60844594 |
| chr17 | 60845264 | 60846843 |
| chr17 | 60847045 | 60847562 |
| chr17 | 60830696 | 60835310 |
| chr17 | 60853702 | 60854205 |
| chr17 | 60856064 | 60857148 |
| chr17 | 60871424 | 60874088 |
| chr17 | 60874973 | 60876376 |
| chr17 | 60867357 | 60870331 |
| chr17 | 60939245 | 60939457 |
| chr17 | 60939359 | 60939483 |
| chr17 | 60946233 | 60946433 |
| chr17 | 60972654 | 60973339 |
| chr17 | 60975389 | 60976486 |
| chr17 | 61011034 | 61011211 |

|       |          |          |
|-------|----------|----------|
| chr17 | 61042473 | 61042973 |
| chr17 | 61484069 | 61484953 |
| chr17 | 61493917 | 61500994 |
| chr17 | 61506574 | 61506610 |
| chr17 | 61501274 | 61506265 |
| chr17 | 61509092 | 61510423 |
| chr17 | 61512611 | 61513416 |
| chr17 | 61520131 | 61520641 |
| chr17 | 61524792 | 61524994 |
| chr17 | 61529636 | 61530221 |
| chr17 | 61553364 | 61558519 |
| chr17 | 61566820 | 61568664 |
| chr17 | 61571229 | 61573164 |
| chr17 | 61579972 | 61581486 |
| chr17 | 61582124 | 61585306 |
| chr17 | 61585665 | 61587367 |
| chr17 | 61591082 | 61593033 |
| chr17 | 61594077 | 61599145 |
| chr17 | 61599791 | 61603612 |
| chr17 | 61606415 | 61607680 |
| chr17 | 61608587 | 61610402 |
| chr17 | 61615219 | 61616948 |
| chr17 | 61617548 | 61618917 |
| chr17 | 61623773 | 61624611 |
| chr17 | 61620077 | 61621045 |
| chr17 | 61592729 | 61592896 |
| chr17 | 61601021 | 61601232 |
| chr17 | 61615708 | 61616557 |
| chr17 | 61649456 | 61649976 |
| chr17 | 61722908 | 61723547 |
| chr17 | 61724514 | 61724545 |
| chr17 | 61752933 | 61753055 |
| chr17 | 61769196 | 61770255 |
| chr17 | 61773354 | 61775866 |
| chr17 | 61776592 | 61778010 |
| chr17 | 61779423 | 61783764 |
| chr17 | 61860106 | 61860378 |
| chr17 | 61903147 | 61907110 |
| chr17 | 61909224 | 61911506 |
| chr17 | 61911862 | 61913091 |
| chr17 | 61898606 | 61899459 |
| chr17 | 61917838 | 61919644 |
| chr17 | 62004674 | 62006157 |

|       |          |          |
|-------|----------|----------|
| chr17 | 62007115 | 62008133 |
| chr17 | 62019779 | 62021393 |
| chr17 | 62026240 | 62029375 |
| chr17 | 62031005 | 62031799 |
| chr17 | 62036360 | 62037857 |
| chr17 | 62065562 | 62068473 |
| chr17 | 62079878 | 62081427 |
| chr17 | 62059967 | 62063625 |
| chr17 | 62102934 | 62103193 |
| chr17 | 62139024 | 62140103 |
| chr17 | 62145942 | 62147660 |
| chr17 | 62159198 | 62160350 |
| chr17 | 62161307 | 62162435 |
| chr17 | 62167679 | 62168228 |
| chr17 | 62231066 | 62232817 |
| chr17 | 62222338 | 62226590 |
| chr17 | 62242188 | 62242881 |
| chr17 | 62308591 | 62309001 |
| chr17 | 62342226 | 62343425 |
| chr17 | 62345754 | 62347706 |
| chr17 | 62352120 | 62353347 |
| chr17 | 62337670 | 62341246 |
| chr17 | 62352275 | 62352746 |
| chr17 | 62397077 | 62399069 |
| chr17 | 62405671 | 62407023 |
| chr17 | 62408839 | 62409955 |
| chr17 | 62492071 | 62494562 |
| chr17 | 62496474 | 62498625 |
| chr17 | 62498862 | 62499964 |
| chr17 | 62771143 | 62771227 |
| chr17 | 63048774 | 63054140 |
| chr17 | 63058142 | 63061191 |
| chr17 | 63070177 | 63071653 |
| chr17 | 63074193 | 63075172 |
| chr17 | 63078477 | 63079554 |
| chr17 | 63084833 | 63086330 |
| chr17 | 63094912 | 63096941 |
| chr17 | 63097762 | 63099183 |
| chr17 | 63099948 | 63100986 |
| chr17 | 63102343 | 63103449 |
| chr17 | 63118640 | 63120708 |
| chr17 | 63133164 | 63134994 |
| chr17 | 63138283 | 63139770 |

|       |          |          |
|-------|----------|----------|
| chr17 | 63145362 | 63146583 |
| chr17 | 63156156 | 63157081 |
| chr17 | 63167379 | 63168277 |
| chr17 | 63168761 | 63174085 |
| chr17 | 63179988 | 63181466 |
| chr17 | 63182456 | 63183273 |
| chr17 | 63183999 | 63184809 |
| chr17 | 63185768 | 63186533 |
| chr17 | 63194366 | 63195686 |
| chr17 | 63209695 | 63211155 |
| chr17 | 63212745 | 63215016 |
| chr17 | 63216426 | 63218551 |
| chr17 | 63232227 | 63232996 |
| chr17 | 63249403 | 63251177 |
| chr17 | 63260646 | 63262902 |
| chr17 | 63266981 | 63268323 |
| chr17 | 63273060 | 63274041 |
| chr17 | 63276980 | 63278382 |
| chr17 | 63279058 | 63280971 |
| chr17 | 63288138 | 63289702 |
| chr17 | 63294073 | 63295451 |
| chr17 | 63298407 | 63299704 |
| chr17 | 63300868 | 63302910 |
| chr17 | 63308697 | 63309882 |
| chr17 | 63312206 | 63313184 |
| chr17 | 63316522 | 63317915 |
| chr17 | 63320561 | 63323658 |
| chr17 | 63127481 | 63128624 |
| chr17 | 63192762 | 63193850 |
| chr17 | 63222795 | 63228025 |
| chr17 | 63256680 | 63258858 |
| chr17 | 63324068 | 63325145 |
| chr17 | 63175731 | 63176964 |
| chr17 | 63134114 | 63134244 |
| chr17 | 63179988 | 63179992 |
| chr17 | 63496475 | 63496585 |
| chr17 | 63542699 | 63544488 |
| chr17 | 63555112 | 63559889 |
| chr17 | 63560723 | 63562026 |
| chr17 | 63595458 | 63596039 |
| chr17 | 63966302 | 63966434 |
| chr17 | 63983751 | 63984343 |
| chr17 | 64219745 | 64220167 |

|       |          |          |
|-------|----------|----------|
| chr17 | 64272199 | 64272506 |
| chr17 | 64295687 | 64296715 |
| chr17 | 64427194 | 64428903 |
| chr17 | 64436377 | 64436680 |
| chr17 | 64438713 | 64439619 |
| chr17 | 64502876 | 64503900 |
| chr17 | 64504618 | 64504863 |
| chr17 | 64537832 | 64539261 |
| chr17 | 64541363 | 64541429 |
| chr17 | 64630496 | 64630948 |
| chr17 | 64651860 | 64653659 |
| chr17 | 64657028 | 64658805 |
| chr17 | 64660239 | 64661634 |
| chr17 | 64663278 | 64664695 |
| chr17 | 64670570 | 64671149 |
| chr17 | 64671517 | 64671586 |
| chr17 | 64671788 | 64672117 |
| chr17 | 64674067 | 64675206 |
| chr17 | 64713378 | 64713880 |
| chr17 | 64805887 | 64806899 |
| chr17 | 64807271 | 64810166 |
| chr17 | 64813362 | 64814870 |
| chr17 | 64815230 | 64818649 |
| chr17 | 64825296 | 64826097 |
| chr17 | 64833940 | 64834791 |
| chr17 | 64844189 | 64845030 |
| chr17 | 64847380 | 64848382 |
| chr17 | 64855279 | 64856249 |
| chr17 | 64871228 | 64872723 |
| chr17 | 64873123 | 64874345 |
| chr17 | 64874576 | 64878492 |
| chr17 | 64882360 | 64883617 |
| chr17 | 64887758 | 64888921 |
| chr17 | 64890702 | 64892048 |
| chr17 | 64895469 | 64896926 |
| chr17 | 64900641 | 64903519 |
| chr17 | 64880208 | 64881081 |
| chr17 | 64910777 | 64911496 |
| chr17 | 64911939 | 64912058 |
| chr17 | 64916595 | 64917127 |
| chr17 | 64931564 | 64936778 |
| chr17 | 64939385 | 64944869 |
| chr17 | 64945481 | 64951636 |



|       |          |          |
|-------|----------|----------|
| chr17 | 64953472 | 64954742 |
| chr17 | 64955767 | 64957596 |
| chr17 | 64963782 | 64964621 |
| chr17 | 64965152 | 64966483 |
| chr17 | 64972692 | 64973584 |
| chr17 | 64976033 | 64977979 |
| chr17 | 64990746 | 64991718 |
| chr17 | 64958791 | 64963042 |
| chr17 | 64963782 | 64964621 |
| chr17 | 64965152 | 64966103 |
| chr17 | 64958791 | 64963042 |
| chr17 | 64995967 | 64996253 |
| chr17 | 64995240 | 64995645 |
| chr17 | 64995967 | 64996392 |
| chr17 | 65006218 | 65006934 |
| chr17 | 65029961 | 65030893 |
| chr17 | 65042006 | 65048494 |
| chr17 | 65242729 | 65243297 |
| chr17 | 65370640 | 65371150 |
| chr17 | 65386358 | 65386913 |
| chr17 | 65506270 | 65506528 |
| chr17 | 65515712 | 65517081 |
| chr17 | 65634031 | 65634861 |
| chr17 | 65991391 | 65991649 |
| chr17 | 66016467 | 66016976 |
| chr17 | 66191379 | 66195231 |
| chr17 | 66285419 | 66290031 |
| chr17 | 66292616 | 66293013 |
| chr17 | 66293203 | 66293529 |
| chr17 | 66323486 | 66325326 |
| chr17 | 66373315 | 66375578 |
| chr17 | 66376950 | 66378320 |
| chr17 | 66378612 | 66380954 |
| chr17 | 66392961 | 66397342 |
| chr17 | 66431426 | 66433102 |
| chr17 | 66435245 | 66436467 |
| chr17 | 66431618 | 66432871 |
| chr17 | 66481299 | 66481427 |
| chr17 | 66488026 | 66488695 |
| chr17 | 66535829 | 66536575 |
| chr17 | 66588668 | 66589754 |
| chr17 | 66601030 | 66602639 |
| chr17 | 66603056 | 66603290 |

|       |          |          |
|-------|----------|----------|
| chr17 | 66586551 | 66587420 |
| chr17 | 66603537 | 66603639 |
| chr17 | 66686860 | 66688118 |
| chr17 | 66693857 | 66694850 |
| chr17 | 66695346 | 66696468 |
| chr17 | 66845792 | 66846047 |
| chr17 | 66870069 | 66870560 |
| chr17 | 66907124 | 66908130 |
| chr17 | 70179089 | 70180198 |
| chr17 | 72199414 | 72200173 |
| chr17 | 72427755 | 72428233 |
| chr17 | 72666924 | 72668181 |
| chr17 | 73284826 | 73285546 |
| chr17 | 73408783 | 73408895 |
| chr17 | 73409054 | 73409156 |
| chr17 | 73453424 | 73454025 |
| chr17 | 73480601 | 73481534 |
| chr17 | 73482956 | 73484592 |
| chr17 | 73486122 | 73486944 |
| chr17 | 73488860 | 73490344 |
| chr17 | 73491648 | 73493257 |
| chr17 | 73493572 | 73494375 |
| chr17 | 73496946 | 73498499 |
| chr17 | 73509996 | 73511059 |
| chr17 | 73512902 | 73514772 |
| chr17 | 73519737 | 73520117 |
| chr17 | 73545167 | 73546172 |
| chr17 | 73584678 | 73584834 |
| chr17 | 73585760 | 73585899 |
| chr17 | 73617252 | 73619000 |
| chr17 | 73619776 | 73622685 |
| chr17 | 73634995 | 73640111 |
| chr17 | 73612769 | 73613585 |
| chr17 | 73628233 | 73631744 |
| chr17 | 73656896 | 73657760 |
| chr17 | 73676142 | 73676690 |
| chr17 | 73683911 | 73685137 |
| chr17 | 73686120 | 73687333 |
| chr17 | 73692978 | 73694565 |
| chr17 | 73716767 | 73721141 |
| chr17 | 73735587 | 73736471 |
| chr17 | 73746304 | 73746679 |
| chr17 | 73758992 | 73759033 |

|       |          |          |
|-------|----------|----------|
| chr17 | 73759530 | 73760787 |
| chr17 | 73761543 | 73761767 |
| chr17 | 73770713 | 73771837 |
| chr17 | 73775959 | 73776253 |
| chr17 | 73779934 | 73780726 |
| chr17 | 73781440 | 73782020 |
| chr17 | 73803457 | 73807363 |
| chr17 | 73814838 | 73816914 |
| chr17 | 73808998 | 73810388 |
| chr17 | 75282196 | 75283885 |
| chr17 | 75473274 | 75474347 |
| chr17 | 75737263 | 75737870 |
| chr17 | 76946526 | 76947873 |
| chr17 | 76946593 | 76946973 |
| chr17 | 79010872 | 79012048 |
| chr17 | 80163612 | 80164486 |
| chr17 | 80298178 | 80299468 |
| chr17 | 80794765 | 80795517 |
| chr17 | 80924363 | 80925527 |
| chr17 | 81008112 | 81010168 |
| chr17 | 81010863 | 81012287 |
| chr17 | 81015615 | 81016455 |
| chr17 | 81017658 | 81018776 |
| chr17 | 81022100 | 81024276 |
| chr17 | 81028356 | 81029982 |
| chr17 | 81030941 | 81034924 |
| chr17 | 81035915 | 81037194 |
| chr17 | 81037620 | 81038834 |
| chr17 | 81040897 | 81043316 |
| chr17 | 81043906 | 81045279 |
| chr17 | 81046496 | 81050274 |
| chr17 | 81054225 | 81058409 |
| chr17 | 81058789 | 81061634 |
| chr17 | 81063048 | 81064444 |
| chr17 | 81069692 | 81070913 |
| chr17 | 81080722 | 81082016 |
| chr17 | 81051059 | 81053789 |
| chr17 | 81064919 | 81069124 |
| chr17 | 81057389 | 81057692 |
| chr17 | 81058050 | 81058230 |
| chr17 | 81151113 | 81152260 |
| chr18 | 12482    | 13299    |
| chr18 | 813015   | 813213   |

|       |          |          |
|-------|----------|----------|
| chr18 | 3236726  | 3236994  |
| chr18 | 3247621  | 3247931  |
| chr18 | 3260735  | 3262912  |
| chr18 | 3623884  | 3624135  |
| chr18 | 8836664  | 8837865  |
| chr18 | 10082508 | 10083597 |
| chr18 | 11544580 | 11544668 |
| chr18 | 15407316 | 15407516 |
| chr18 | 15407675 | 15407891 |
| chr18 | 15407956 | 15408190 |
| chr18 | 15409259 | 15409492 |
| chr18 | 15409812 | 15410010 |
| chr18 | 18510791 | 18520921 |
| chr18 | 18510815 | 18520921 |
| chr18 | 20849582 | 20850858 |
| chr18 | 21221471 | 21222272 |
| chr18 | 29357773 | 29359290 |
| chr18 | 29553444 | 29554748 |
| chr18 | 32824654 | 32826602 |
| chr18 | 32887166 | 32887675 |
| chr18 | 43373138 | 43373342 |
| chr18 | 43373479 | 43373711 |
| chr18 | 44710641 | 44711528 |
| chr18 | 67939513 | 67939828 |
| chr18 | 77656678 | 77658351 |
| chr18 | 77781414 | 77783712 |
| chr18 | 77782655 | 77783023 |
| chr19 | 1774414  | 1775773  |
| chr19 | 2852857  | 2853705  |
| chr19 | 2933939  | 2934445  |
| chr19 | 4374578  | 4376376  |
| chr19 | 5503763  | 5504280  |
| chr19 | 6287170  | 6287675  |
| chr19 | 7083049  | 7083815  |
| chr19 | 8053356  | 8054163  |
| chr19 | 8133785  | 8135086  |
| chr19 | 10527017 | 10528031 |
| chr19 | 10530178 | 10531378 |
| chr19 | 10859302 | 10860257 |
| chr19 | 11589346 | 11590337 |
| chr19 | 11731926 | 11732038 |
| chr19 | 11878387 | 11879343 |
| chr19 | 11908480 | 11909521 |

|       |          |          |
|-------|----------|----------|
| chr19 | 11924550 | 11924758 |
| chr19 | 12251462 | 12251628 |
| chr19 | 12305603 | 12305819 |
| chr19 | 12305707 | 12305828 |
| chr19 | 12994211 | 12996140 |
| chr19 | 16089317 | 16090164 |
| chr19 | 16184677 | 16185647 |
| chr19 | 16284087 | 16284618 |
| chr19 | 16574099 | 16575324 |
| chr19 | 18974222 | 18975068 |
| chr19 | 19578523 | 19580165 |
| chr19 | 19626425 | 19627372 |
| chr19 | 19660287 | 19661144 |
| chr19 | 19843381 | 19844385 |
| chr19 | 19843786 | 19844419 |
| chr19 | 19888003 | 19888690 |
| chr19 | 21044289 | 21044362 |
| chr19 | 21062710 | 21063931 |
| chr19 | 21079059 | 21080551 |
| chr19 | 21090984 | 21092573 |
| chr19 | 21069075 | 21069991 |
| chr19 | 23279303 | 23281969 |
| chr19 | 23487916 | 23489034 |
| chr19 | 23656942 | 23657229 |
| chr19 | 23744635 | 23744776 |
| chr19 | 24183558 | 24183611 |
| chr19 | 24183993 | 24184250 |
| chr19 | 24184391 | 24184627 |
| chr19 | 24184685 | 24185116 |
| chr19 | 24368856 | 24369223 |
| chr19 | 24516168 | 24536219 |
| chr19 | 24523063 | 24523297 |
| chr19 | 24526068 | 24526319 |
| chr19 | 24555972 | 24557320 |
| chr19 | 24586938 | 24587172 |
| chr19 | 24594184 | 24594417 |
| chr19 | 27731620 | 27741228 |
| chr19 | 27756815 | 27756908 |
| chr19 | 27757178 | 27757386 |
| chr19 | 27760421 | 27760633 |
| chr19 | 27760499 | 27760722 |
| chr19 | 27836623 | 27838132 |
| chr19 | 27858225 | 27862258 |

|       |          |          |
|-------|----------|----------|
| chr19 | 27873414 | 27880547 |
| chr19 | 27880843 | 27881778 |
| chr19 | 27882856 | 27884062 |
| chr19 | 27838393 | 27857430 |
| chr19 | 27868232 | 27870873 |
| chr19 | 27885129 | 27888442 |
| chr19 | 27842115 | 27842354 |
| chr19 | 27844942 | 27845058 |
| chr19 | 27845623 | 27845824 |
| chr19 | 27850615 | 27850868 |
| chr19 | 27851272 | 27851508 |
| chr19 | 27874529 | 27874760 |
| chr19 | 27876388 | 27876650 |
| chr19 | 27879564 | 27879799 |
| chr19 | 27906168 | 27906400 |
| chr19 | 27929131 | 27929365 |
| chr19 | 27967022 | 27967263 |
| chr19 | 28284578 | 28285447 |
| chr19 | 28383134 | 28383880 |
| chr19 | 29087427 | 29089287 |
| chr19 | 29226004 | 29226739 |
| chr19 | 30009943 | 30010706 |
| chr19 | 30013578 | 30014248 |
| chr19 | 30017805 | 30018744 |
| chr19 | 30019468 | 30022182 |
| chr19 | 30029521 | 30030419 |
| chr19 | 30055199 | 30056223 |
| chr19 | 30059098 | 30059841 |
| chr19 | 30339833 | 30340930 |
| chr19 | 30554795 | 30555766 |
| chr19 | 30561981 | 30562325 |
| chr19 | 30716897 | 30718539 |
| chr19 | 30950593 | 30951424 |
| chr19 | 31559864 | 31560944 |
| chr19 | 31569694 | 31570382 |
| chr19 | 31570749 | 31570842 |
| chr19 | 31573938 | 31574969 |
| chr19 | 31587806 | 31589271 |
| chr19 | 31739026 | 31739881 |
| chr19 | 31887900 | 31888708 |
| chr19 | 32026999 | 32028829 |
| chr19 | 32185083 | 32186113 |
| chr19 | 32205501 | 32206280 |

|       |          |          |
|-------|----------|----------|
| chr19 | 33165979 | 33166664 |
| chr19 | 33168062 | 33168870 |
| chr19 | 33444425 | 33444566 |
| chr19 | 33667160 | 33667399 |
| chr19 | 33696041 | 33696880 |
| chr19 | 33700983 | 33701722 |
| chr19 | 33714777 | 33715665 |
| chr19 | 33718983 | 33719905 |
| chr19 | 33729180 | 33730086 |
| chr19 | 33731434 | 33732172 |
| chr19 | 33736363 | 33739138 |
| chr19 | 33714777 | 33715665 |
| chr19 | 33718983 | 33719709 |
| chr19 | 33758730 | 33760194 |
| chr19 | 33760520 | 33761650 |
| chr19 | 33764742 | 33766193 |
| chr19 | 33768551 | 33769563 |
| chr19 | 33792721 | 33794750 |
| chr19 | 33792721 | 33794750 |
| chr19 | 33835272 | 33836481 |
| chr19 | 33838537 | 33840200 |
| chr19 | 33861245 | 33862006 |
| chr19 | 33863626 | 33865383 |
| chr19 | 33909537 | 33910414 |
| chr19 | 33927549 | 33929047 |
| chr19 | 34013230 | 34013330 |
| chr19 | 34013554 | 34013755 |
| chr19 | 34070958 | 34071845 |
| chr19 | 34072064 | 34072857 |
| chr19 | 34103963 | 34105151 |
| chr19 | 34113027 | 34114204 |
| chr19 | 34113027 | 34114204 |
| chr19 | 34132001 | 34132501 |
| chr19 | 34169298 | 34170227 |
| chr19 | 34182953 | 34183963 |
| chr19 | 34267529 | 34270232 |
| chr19 | 34310713 | 34311314 |
| chr19 | 34396262 | 34396896 |
| chr19 | 34846133 | 34847183 |
| chr19 | 34877870 | 34878824 |
| chr19 | 34972212 | 34972323 |
| chr19 | 34994728 | 34994756 |
| chr19 | 35163112 | 35164265 |

|       |          |          |
|-------|----------|----------|
| chr19 | 35169937 | 35171481 |
| chr19 | 35181037 | 35181820 |
| chr19 | 35204054 | 35204185 |
| chr19 | 35226616 | 35228062 |
| chr19 | 35250956 | 35251204 |
| chr19 | 35292008 | 35293482 |
| chr19 | 35293959 | 35295781 |
| chr19 | 35300896 | 35302358 |
| chr19 | 35304167 | 35305003 |
| chr19 | 35308185 | 35309004 |
| chr19 | 35290503 | 35291385 |
| chr19 | 35325434 | 35325953 |
| chr19 | 35342271 | 35342309 |
| chr19 | 35394420 | 35395733 |
| chr19 | 35398366 | 35398604 |
| chr19 | 35435331 | 35435548 |
| chr19 | 35451363 | 35451869 |
| chr19 | 35453968 | 35454143 |
| chr19 | 35459325 | 35459438 |
| chr19 | 35463760 | 35463846 |
| chr19 | 35464346 | 35464454 |
| chr19 | 35504605 | 35504726 |
| chr19 | 35504647 | 35504865 |
| chr19 | 35512135 | 35512493 |
| chr19 | 35518103 | 35519065 |
| chr19 | 35522679 | 35524400 |
| chr19 | 35528711 | 35529717 |
| chr19 | 35530397 | 35531473 |
| chr19 | 35534048 | 35535229 |
| chr19 | 35539969 | 35541011 |
| chr19 | 35606934 | 35608594 |
| chr19 | 35617169 | 35618017 |
| chr19 | 35644478 | 35646743 |
| chr19 | 35652168 | 35653202 |
| chr19 | 35689668 | 35690756 |
| chr19 | 35704480 | 35705476 |
| chr19 | 35707587 | 35708574 |
| chr19 | 35713567 | 35714558 |
| chr19 | 35715373 | 35716339 |
| chr19 | 35757277 | 35758109 |
| chr19 | 35768132 | 35768989 |
| chr19 | 35771813 | 35772706 |
| chr19 | 35802773 | 35803690 |



|       |          |          |
|-------|----------|----------|
| chr19 | 35807229 | 35808176 |
| chr19 | 35811041 | 35811851 |
| chr19 | 35812986 | 35813785 |
| chr19 | 35819907 | 35820750 |
| chr19 | 35842683 | 35844116 |
| chr19 | 35848099 | 35849279 |
| chr19 | 35879599 | 35880285 |
| chr19 | 35938690 | 35938962 |
| chr19 | 35974893 | 35975747 |
| chr19 | 35980453 | 35981923 |
| chr19 | 35982485 | 35983850 |
| chr19 | 35984209 | 35985166 |
| chr19 | 35985832 | 35987101 |
| chr19 | 35991570 | 35992593 |
| chr19 | 36000822 | 36002177 |
| chr19 | 36030407 | 36031781 |
| chr19 | 36035025 | 36035956 |
| chr19 | 36036693 | 36038449 |
| chr19 | 36047825 | 36049293 |
| chr19 | 36055362 | 36056389 |
| chr19 | 36057537 | 36058397 |
| chr19 | 36059859 | 36060723 |
| chr19 | 36062211 | 36063171 |
| chr19 | 36079252 | 36080137 |
| chr19 | 36089487 | 36089995 |
| chr19 | 36136101 | 36136704 |
| chr19 | 36193762 | 36193864 |
| chr19 | 36204525 | 36205150 |
| chr19 | 36207577 | 36207879 |
| chr19 | 36231168 | 36231723 |
| chr19 | 36280121 | 36283022 |
| chr19 | 36283796 | 36284692 |
| chr19 | 36287592 | 36289500 |
| chr19 | 36287710 | 36288457 |
| chr19 | 36334889 | 36335734 |
| chr19 | 36336236 | 36337358 |
| chr19 | 36356388 | 36356819 |
| chr19 | 36369457 | 36370300 |
| chr19 | 36439766 | 36440665 |
| chr19 | 36448652 | 36450698 |
| chr19 | 36476827 | 36477582 |
| chr19 | 36488225 | 36489013 |
| chr19 | 36485274 | 36487358 |

|       |          |          |
|-------|----------|----------|
| chr19 | 36493939 | 36494687 |
| chr19 | 36499210 | 36500929 |
| chr19 | 36503962 | 36504865 |
| chr19 | 36508413 | 36509405 |
| chr19 | 36541856 | 36542662 |
| chr19 | 36545060 | 36546585 |
| chr19 | 36550914 | 36552269 |
| chr19 | 36563649 | 36564570 |
| chr19 | 36604612 | 36606262 |
| chr19 | 36611993 | 36612008 |
| chr19 | 36601489 | 36602540 |
| chr19 | 36618531 | 36618747 |
| chr19 | 36736383 | 36737795 |
| chr19 | 36832128 | 36832233 |
| chr19 | 36869350 | 36869900 |
| chr19 | 36979604 | 36980288 |
| chr19 | 37095047 | 37096021 |
| chr19 | 37157321 | 37157894 |
| chr19 | 37157791 | 37157906 |
| chr19 | 37263525 | 37263561 |
| chr19 | 37263884 | 37264405 |
| chr19 | 37329058 | 37329830 |
| chr19 | 37341937 | 37342587 |
| chr19 | 37407671 | 37408025 |
| chr19 | 37569291 | 37570090 |
| chr19 | 37709197 | 37709398 |
| chr19 | 37742367 | 37742489 |
| chr19 | 37862319 | 37862392 |
| chr19 | 37957834 | 37958856 |
| chr19 | 37996952 | 37998413 |
| chr19 | 38084689 | 38086289 |
| chr19 | 38308355 | 38308992 |
| chr19 | 38375454 | 38378159 |
| chr19 | 38389978 | 38390883 |
| chr19 | 38375454 | 38378159 |
| chr19 | 38389978 | 38390883 |
| chr19 | 38397172 | 38398277 |
| chr19 | 38420919 | 38421859 |
| chr19 | 38431869 | 38433272 |
| chr19 | 38460001 | 38461219 |
| chr19 | 38503332 | 38504228 |
| chr19 | 38559115 | 38559914 |
| chr19 | 38665711 | 38666509 |

|       |          |          |
|-------|----------|----------|
| chr19 | 38757737 | 38757903 |
| chr19 | 38780979 | 38781849 |
| chr19 | 38789059 | 38790118 |
| chr19 | 38810009 | 38810192 |
| chr19 | 38849892 | 38850736 |
| chr19 | 38879833 | 38880716 |
| chr19 | 38881039 | 38881765 |
| chr19 | 39109169 | 39110373 |
| chr19 | 39137714 | 39139449 |
| chr19 | 39148882 | 39149810 |
| chr19 | 39182618 | 39184364 |
| chr19 | 39188680 | 39189720 |
| chr19 | 39214766 | 39215660 |
| chr19 | 39173256 | 39174182 |
| chr19 | 39277270 | 39277928 |
| chr19 | 39617669 | 39617893 |
| chr19 | 39656951 | 39657812 |
| chr19 | 39689033 | 39689235 |
| chr19 | 39811962 | 39812978 |
| chr19 | 39832192 | 39832638 |
| chr19 | 39867872 | 39868732 |
| chr19 | 39870554 | 39871916 |
| chr19 | 39891417 | 39892395 |
| chr19 | 39892722 | 39893693 |
| chr19 | 39893928 | 39895016 |
| chr19 | 39896852 | 39898718 |
| chr19 | 39902876 | 39905173 |
| chr19 | 39906794 | 39908106 |
| chr19 | 39892238 | 39892395 |
| chr19 | 39892983 | 39893214 |
| chr19 | 39935444 | 39936431 |
| chr19 | 39964490 | 39965809 |
| chr19 | 40004953 | 40007020 |
| chr19 | 40045984 | 40046591 |
| chr19 | 40059410 | 40059847 |
| chr19 | 40086651 | 40087540 |
| chr19 | 40201056 | 40201801 |
| chr19 | 40335715 | 40336660 |
| chr19 | 40502478 | 40503713 |
| chr19 | 40561705 | 40562256 |
| chr19 | 40762342 | 40763313 |
| chr19 | 40790752 | 40790807 |
| chr19 | 40886294 | 40887209 |

|       |          |          |
|-------|----------|----------|
| chr19 | 41039862 | 41041588 |
| chr19 | 41073523 | 41074411 |
| chr19 | 41074254 | 41074363 |
| chr19 | 41092576 | 41093301 |
| chr19 | 41102980 | 41104845 |
| chr19 | 41105792 | 41107202 |
| chr19 | 41108959 | 41109679 |
| chr19 | 41092576 | 41093301 |
| chr19 | 41102980 | 41104845 |
| chr19 | 41105792 | 41107202 |
| chr19 | 41108959 | 41109679 |
| chr19 | 41103311 | 41103545 |
| chr19 | 41104310 | 41104594 |
| chr19 | 41105792 | 41106097 |
| chr19 | 41106278 | 41107117 |
| chr19 | 41108959 | 41109146 |
| chr19 | 41140064 | 41140716 |
| chr19 | 41196050 | 41196991 |
| chr19 | 41198883 | 41200451 |
| chr19 | 41221499 | 41221734 |
| chr19 | 41247275 | 41248483 |
| chr19 | 41309356 | 41310341 |
| chr19 | 41413411 | 41414178 |
| chr19 | 41417786 | 41417899 |
| chr19 | 41536473 | 41537224 |
| chr19 | 41859798 | 41860382 |
| chr19 | 42069301 | 42071664 |
| chr19 | 42090572 | 42091405 |
| chr19 | 42133825 | 42134575 |
| chr19 | 42174415 | 42175287 |
| chr19 | 42186613 | 42187427 |
| chr19 | 42259789 | 42260089 |
| chr19 | 42265712 | 42266808 |
| chr19 | 42283697 | 42284423 |
| chr19 | 42376373 | 42377223 |
| chr19 | 42387592 | 42388916 |
| chr19 | 42415276 | 42416757 |
| chr19 | 42431221 | 42432743 |
| chr19 | 42556620 | 42558091 |
| chr19 | 42567163 | 42568414 |
| chr19 | 42606000 | 42606011 |
| chr19 | 42750566 | 42750714 |
| chr19 | 42750805 | 42750906 |

|       |          |          |
|-------|----------|----------|
| chr19 | 42751174 | 42751417 |
| chr19 | 42776245 | 42777214 |
| chr19 | 42806129 | 42806458 |
| chr19 | 42807291 | 42807474 |
| chr19 | 42885988 | 42886100 |
| chr19 | 42904455 | 42905486 |
| chr19 | 43189615 | 43191085 |
| chr19 | 43628312 | 43629086 |
| chr19 | 43804078 | 43805711 |
| chr19 | 43812756 | 43813581 |
| chr19 | 43820862 | 43820962 |
| chr19 | 43833455 | 43834270 |
| chr19 | 43836062 | 43837601 |
| chr19 | 43839506 | 43840417 |
| chr19 | 44008554 | 44009268 |
| chr19 | 44100480 | 44100984 |
| chr19 | 44135626 | 44136479 |
| chr19 | 44140047 | 44140734 |
| chr19 | 44194373 | 44196923 |
| chr19 | 44199910 | 44200895 |
| chr19 | 44212306 | 44213689 |
| chr19 | 44230943 | 44231655 |
| chr19 | 44252871 | 44253930 |
| chr19 | 44277274 | 44279057 |
| chr19 | 44284773 | 44285822 |
| chr19 | 44324717 | 44325617 |
| chr19 | 44506684 | 44506994 |
| chr19 | 44514600 | 44514792 |
| chr19 | 44533669 | 44534428 |
| chr19 | 44534993 | 44537101 |
| chr19 | 44555479 | 44555727 |
| chr19 | 44566804 | 44568531 |
| chr19 | 44569761 | 44572336 |
| chr19 | 44645180 | 44645446 |
| chr19 | 44668524 | 44669506 |
| chr19 | 44915271 | 44915439 |
| chr19 | 45218266 | 45219313 |
| chr19 | 45219070 | 45219325 |
| chr19 | 45625707 | 45625824 |
| chr19 | 45681848 | 45681895 |
| chr19 | 45735250 | 45735579 |
| chr19 | 46101140 | 46102474 |
| chr19 | 46368160 | 46368748 |

|       |          |          |
|-------|----------|----------|
| chr19 | 46477410 | 46477535 |
| chr19 | 46583332 | 46584387 |
| chr19 | 46561946 | 46564188 |
| chr19 | 46584171 | 46584387 |
| chr19 | 46724350 | 46725500 |
| chr19 | 46727134 | 46727780 |
| chr19 | 46829386 | 46830144 |
| chr19 | 46829498 | 46829598 |
| chr19 | 46876362 | 46877639 |
| chr19 | 47401918 | 47402420 |
| chr19 | 47606021 | 47606723 |
| chr19 | 47734671 | 47734961 |
| chr19 | 47734724 | 47734944 |
| chr19 | 48993771 | 48994619 |
| chr19 | 49178559 | 49178678 |
| chr19 | 49178620 | 49178824 |
| chr19 | 50213810 | 50214102 |
| chr19 | 50370017 | 50371341 |
| chr19 | 50490386 | 50490595 |
| chr19 | 50490691 | 50490861 |
| chr19 | 50546859 | 50552350 |
| chr19 | 50956053 | 50956889 |
| chr19 | 50989322 | 50990963 |
| chr19 | 51190481 | 51191566 |
| chr19 | 51324814 | 51325728 |
| chr19 | 51582291 | 51583444 |
| chr19 | 51595993 | 51596904 |
| chr19 | 51637768 | 51638740 |
| chr19 | 52089723 | 52091676 |
| chr19 | 52489503 | 52490099 |
| chr19 | 52496107 | 52497471 |
| chr19 | 52618624 | 52618840 |
| chr19 | 53540192 | 53540395 |
| chr19 | 54599303 | 54599446 |
| chr19 | 54761177 | 54761507 |
| chr19 | 54959959 | 54961089 |
| chr19 | 54959959 | 54961089 |
| chr19 | 55692273 | 55693407 |
| chr19 | 55768512 | 55769825 |
| chr19 | 55770101 | 55771233 |
| chr19 | 56154477 | 56154640 |
| chr19 | 56181290 | 56182342 |
| chr19 | 56653381 | 56654278 |

|       |          |          |
|-------|----------|----------|
| chr19 | 56934946 | 56935068 |
| chr19 | 57802918 | 57804000 |
| chr19 | 57868136 | 57868814 |
| chr19 | 57954029 | 57954131 |
| chr19 | 57954454 | 57955037 |
| chr19 | 57954751 | 57955042 |
| chr19 | 57984564 | 57987252 |
| chr19 | 57987852 | 57988139 |
| chr19 | 58048750 | 58048851 |
| chr19 | 58050210 | 58050441 |
| chr19 | 58069007 | 58070359 |
| chr19 | 58074541 | 58074846 |
| chr19 | 58081976 | 58083039 |
| chr19 | 58089620 | 58089718 |
| chr19 | 58095850 | 58097234 |
| chr19 | 58098027 | 58099596 |
| chr19 | 58099971 | 58104353 |
| chr19 | 58110881 | 58111866 |
| chr19 | 58117301 | 58118099 |
| chr19 | 58117565 | 58118116 |
| chr19 | 58125886 | 58127180 |
| chr19 | 58132721 | 58133246 |
| chr19 | 58152097 | 58152774 |
| chr19 | 58195120 | 58196547 |
| chr19 | 58198052 | 58199366 |
| chr19 | 58215391 | 58215491 |
| chr19 | 58220321 | 58220536 |
| chr19 | 58230759 | 58231365 |
| chr19 | 58289733 | 58291259 |
| chr19 | 58512922 | 58514734 |
| chr19 | 58607687 | 58608719 |
| chr19 | 58608187 | 58608794 |
| chr19 | 58665615 | 58665849 |
| chr19 | 58693128 | 58694145 |
| chr19 | 58693601 | 58694175 |
| chr19 | 58719204 | 58719292 |
| chr19 | 58720099 | 58726692 |
| chr19 | 58745135 | 58745856 |
| chr19 | 58772547 | 58774693 |
| chr19 | 58838068 | 58839266 |
| chr19 | 58891588 | 58892152 |
| chr19 | 58941210 | 58942639 |
| chr19 | 58943146 | 58946785 |

|       |          |          |
|-------|----------|----------|
| chr19 | 58952173 | 58953392 |
| chr19 | 58959854 | 58961285 |
| chr19 | 59030374 | 59030563 |
| chr19 | 59031131 | 59031666 |
| chr2  | 57673    | 58993    |
| chr2  | 1628915  | 1629775  |
| chr2  | 8672315  | 8672671  |
| chr2  | 8814350  | 8815381  |
| chr2  | 8815224  | 8815381  |
| chr2  | 10442077 | 10443075 |
| chr2  | 11605944 | 11607008 |
| chr2  | 11802858 | 11803925 |
| chr2  | 14774010 | 14775124 |
| chr2  | 19340507 | 19341201 |
| chr2  | 19513072 | 19513584 |
| chr2  | 20430908 | 20431954 |
| chr2  | 20551003 | 20552183 |
| chr2  | 20609565 | 20609831 |
| chr2  | 20695730 | 20696808 |
| chr2  | 27273454 | 27274637 |
| chr2  | 27664701 | 27665942 |
| chr2  | 27886524 | 27886648 |
| chr2  | 28660183 | 28661040 |
| chr2  | 29302323 | 29303922 |
| chr2  | 30924093 | 30925550 |
| chr2  | 31212600 | 31213622 |
| chr2  | 31360968 | 31361778 |
| chr2  | 31917699 | 31920247 |
| chr2  | 33490968 | 33491468 |
| chr2  | 33700431 | 33701486 |
| chr2  | 38303492 | 38303870 |
| chr2  | 38353307 | 38356110 |
| chr2  | 38375167 | 38376447 |
| chr2  | 38707257 | 38708644 |
| chr2  | 38707415 | 38707604 |
| chr2  | 39748555 | 39749920 |
| chr2  | 42002711 | 42003832 |
| chr2  | 43357636 | 43358993 |
| chr2  | 43455307 | 43455536 |
| chr2  | 45118541 | 45119718 |
| chr2  | 46163323 | 46164265 |
| chr2  | 46165551 | 46166576 |
| chr2  | 46635735 | 46637106 |



|      |          |          |
|------|----------|----------|
| chr2 | 47403181 | 47404416 |
| chr2 | 47797574 | 47799178 |
| chr2 | 55347529 | 55348387 |
| chr2 | 55843972 | 55844957 |
| chr2 | 56899338 | 56900843 |
| chr2 | 61243776 | 61244830 |
| chr2 | 61403773 | 61404647 |
| chr2 | 62511695 | 62512879 |
| chr2 | 62506956 | 62507163 |
| chr2 | 65662718 | 65662811 |
| chr2 | 65701618 | 65703460 |
| chr2 | 65714149 | 65715418 |
| chr2 | 67873591 | 67874855 |
| chr2 | 70367926 | 70369054 |
| chr2 | 71688902 | 71690626 |
| chr2 | 71951583 | 71952738 |
| chr2 | 71973942 | 71974774 |
| chr2 | 72270754 | 72272038 |
| chr2 | 73629764 | 73630870 |
| chr2 | 74236948 | 74238115 |
| chr2 | 74348162 | 74348235 |
| chr2 | 74681441 | 74682676 |
| chr2 | 74681942 | 74682212 |
| chr2 | 75776039 | 75777394 |
| chr2 | 85029074 | 85030031 |
| chr2 | 85134041 | 85135122 |
| chr2 | 85553909 | 85554632 |
| chr2 | 85555229 | 85555557 |
| chr2 | 85750571 | 85751071 |
| chr2 | 85969263 | 85970200 |
| chr2 | 86168690 | 86173147 |
| chr2 | 86181428 | 86182768 |
| chr2 | 86497828 | 86499964 |
| chr2 | 88568457 | 88569399 |
| chr2 | 88990066 | 88991868 |
| chr2 | 89836368 | 89837993 |
| chr2 | 89839698 | 89842519 |
| chr2 | 89843220 | 89847087 |
| chr2 | 89850569 | 89853588 |
| chr2 | 89856817 | 89861371 |
| chr2 | 89862038 | 89865905 |
| chr2 | 89832132 | 89835804 |
| chr2 | 89848546 | 89850202 |

|      |          |          |
|------|----------|----------|
| chr2 | 89866143 | 89881400 |
| chr2 | 90372239 | 90372472 |
| chr2 | 90372614 | 90373123 |
| chr2 | 90373332 | 90373409 |
| chr2 | 90482152 | 90482364 |
| chr2 | 90485340 | 90485536 |
| chr2 | 91599323 | 91599551 |
| chr2 | 91759297 | 91764806 |
| chr2 | 91773591 | 91774490 |
| chr2 | 91774959 | 91777314 |
| chr2 | 91777711 | 91780194 |
| chr2 | 91765100 | 91773366 |
| chr2 | 91780490 | 91784388 |
| chr2 | 91784618 | 91822016 |
| chr2 | 92267622 | 92268283 |
| chr2 | 92268622 | 92270548 |
| chr2 | 92272220 | 92272228 |
| chr2 | 92272447 | 92273918 |
| chr2 | 92274506 | 92274741 |
| chr2 | 92275127 | 92275359 |
| chr2 | 92275137 | 92275457 |
| chr2 | 92275817 | 92276438 |
| chr2 | 92276673 | 92276837 |
| chr2 | 92280747 | 92280980 |
| chr2 | 92281195 | 92281631 |
| chr2 | 92287685 | 92287863 |
| chr2 | 92288239 | 92288429 |
| chr2 | 92289659 | 92291811 |
| chr2 | 92292759 | 92292868 |
| chr2 | 92296108 | 92296334 |
| chr2 | 92296617 | 92297074 |
| chr2 | 92297251 | 92297580 |
| chr2 | 92297862 | 92298105 |
| chr2 | 92305459 | 92307093 |
| chr2 | 92307435 | 92307672 |
| chr2 | 92307948 | 92308192 |
| chr2 | 92308556 | 92308720 |
| chr2 | 92308890 | 92309360 |
| chr2 | 92309477 | 92309715 |
| chr2 | 92315435 | 92322594 |
| chr2 | 92322814 | 92325229 |
| chr2 | 92323306 | 92323801 |
| chr2 | 92324145 | 92324361 |

|      |           |           |
|------|-----------|-----------|
| chr2 | 92324702  | 92325002  |
| chr2 | 95809223  | 95811514  |
| chr2 | 95821769  | 95823256  |
| chr2 | 95830873  | 95831944  |
| chr2 | 95811990  | 95819172  |
| chr2 | 95876161  | 95881696  |
| chr2 | 96777884  | 96778577  |
| chr2 | 97481648  | 97482605  |
| chr2 | 97534373  | 97535513  |
| chr2 | 97537998  | 97539390  |
| chr2 | 97548613  | 97550281  |
| chr2 | 97553161  | 97555060  |
| chr2 | 97556716  | 97558091  |
| chr2 | 97562982  | 97564154  |
| chr2 | 97596311  | 97597194  |
| chr2 | 97581415  | 97583286  |
| chr2 | 97598948  | 97599688  |
| chr2 | 97553161  | 97553236  |
| chr2 | 97563336  | 97563611  |
| chr2 | 99583447  | 99583833  |
| chr2 | 99797649  | 99797851  |
| chr2 | 100878764 | 100879922 |
| chr2 | 100937015 | 100938252 |
| chr2 | 100984844 | 100985041 |
| chr2 | 101080534 | 101081232 |
| chr2 | 101222712 | 101223587 |
| chr2 | 101736763 | 101737534 |
| chr2 | 102761598 | 102766119 |
| chr2 | 102759573 | 102760755 |
| chr2 | 102759735 | 102760317 |
| chr2 | 103028230 | 103029802 |
| chr2 | 103121503 | 103122038 |
| chr2 | 103416328 | 103418581 |
| chr2 | 103416328 | 103418581 |
| chr2 | 109014702 | 109016814 |
| chr2 | 109710132 | 109711435 |
| chr2 | 113623222 | 113624661 |
| chr2 | 113811993 | 113814457 |
| chr2 | 119501906 | 119502947 |
| chr2 | 120178548 | 120179784 |
| chr2 | 120516704 | 120518227 |
| chr2 | 120549989 | 120552996 |
| chr2 | 120289505 | 120292992 |

|      |           |           |
|------|-----------|-----------|
| chr2 | 121114864 | 121115597 |
| chr2 | 121406528 | 121408544 |
| chr2 | 121796381 | 121797234 |
| chr2 | 128577628 | 128578216 |
| chr2 | 129031509 | 129032144 |
| chr2 | 129225745 | 129227084 |
| chr2 | 131129377 | 131130454 |
| chr2 | 132997835 | 132998491 |
| chr2 | 133005171 | 133006638 |
| chr2 | 133008012 | 133008524 |
| chr2 | 133016559 | 133017497 |
| chr2 | 133104904 | 133105416 |
| chr2 | 133173461 | 133174667 |
| chr2 | 133223401 | 133226234 |
| chr2 | 133299718 | 133302693 |
| chr2 | 134151633 | 134151760 |
| chr2 | 134832842 | 134834048 |
| chr2 | 134877165 | 134878032 |
| chr2 | 136875522 | 136876507 |
| chr2 | 136938484 | 136939443 |
| chr2 | 136875522 | 136876507 |
| chr2 | 138140168 | 138141954 |
| chr2 | 138922273 | 138923270 |
| chr2 | 145090005 | 145090902 |
| chr2 | 145090404 | 145090902 |
| chr2 | 149011565 | 149012436 |
| chr2 | 149016881 | 149016988 |
| chr2 | 149360399 | 149361288 |
| chr2 | 151002785 | 151004351 |
| chr2 | 152915062 | 152916021 |
| chr2 | 159579750 | 159581082 |
| chr2 | 160924531 | 160924776 |
| chr2 | 160943147 | 160947380 |
| chr2 | 161061807 | 161062770 |
| chr2 | 162134617 | 162138837 |
| chr2 | 162913194 | 162914323 |
| chr2 | 163346672 | 163347606 |
| chr2 | 165370645 | 165371842 |
| chr2 | 170440749 | 170441489 |
| chr2 | 171114086 | 171114907 |
| chr2 | 171773943 | 171775212 |
| chr2 | 171784702 | 171785233 |
| chr2 | 171830548 | 171830648 |

|      |           |           |
|------|-----------|-----------|
| chr2 | 172483113 | 172484169 |
| chr2 | 173818543 | 173819415 |
| chr2 | 173862908 | 173864181 |
| chr2 | 174364952 | 174366827 |
| chr2 | 175536035 | 175537140 |
| chr2 | 178127572 | 178128837 |
| chr2 | 178422182 | 178423325 |
| chr2 | 178977154 | 178977404 |
| chr2 | 189701253 | 189701520 |
| chr2 | 190406401 | 190407406 |
| chr2 | 190848195 | 190848317 |
| chr2 | 191583247 | 191584458 |
| chr2 | 192348119 | 192348982 |
| chr2 | 196996118 | 196996836 |
| chr2 | 197217984 | 197219233 |
| chr2 | 197217984 | 197219301 |
| chr2 | 198625037 | 198625540 |
| chr2 | 200819813 | 200820864 |
| chr2 | 201164946 | 201165490 |
| chr2 | 201983088 | 201984282 |
| chr2 | 204443853 | 204443965 |
| chr2 | 209260139 | 209260177 |
| chr2 | 210240661 | 210241849 |
| chr2 | 213770303 | 213770858 |
| chr2 | 214340894 | 214341028 |
| chr2 | 217819115 | 217820419 |
| chr2 | 218154477 | 218155389 |
| chr2 | 218625792 | 218627345 |
| chr2 | 220143907 | 220144619 |
| chr2 | 220525406 | 220526737 |
| chr2 | 220995085 | 220996106 |
| chr2 | 221056853 | 221057362 |
| chr2 | 232650723 | 232651891 |
| chr2 | 235605587 | 235606806 |
| chr2 | 237718008 | 237719030 |
| chr2 | 237957914 | 237958104 |
| chr2 | 238055470 | 238056805 |
| chr2 | 238147952 | 238151223 |
| chr2 | 238398795 | 238401216 |
| chr2 | 238839101 | 238839950 |
| chr2 | 238852186 | 238853766 |
| chr2 | 238870654 | 238870997 |
| chr2 | 239437544 | 239438963 |

|       |           |           |
|-------|-----------|-----------|
| chr2  | 240823549 | 240824146 |
| chr2  | 240823549 | 240825030 |
| chr2  | 240856309 | 240857872 |
| chr2  | 241201682 | 241202898 |
| chr2  | 241210893 | 241212056 |
| chr2  | 241470988 | 241472412 |
| chr2  | 241793369 | 241794505 |
| chr2  | 241964495 | 241966479 |
| chr2  | 242255487 | 242255490 |
| chr2  | 242579672 | 242579689 |
| chr20 | 3220220   | 3220756   |
| chr20 | 3748825   | 3751048   |
| chr20 | 3761457   | 3762575   |
| chr20 | 3792092   | 3793118   |
| chr20 | 3797120   | 3797447   |
| chr20 | 8086208   | 8086867   |
| chr20 | 10199944  | 10200911  |
| chr20 | 10199944  | 10200911  |
| chr20 | 10199944  | 10199960  |
| chr20 | 13200665  | 13201444  |
| chr20 | 13224020  | 13224935  |
| chr20 | 17549167  | 17551232  |
| chr20 | 17552326  | 17553146  |
| chr20 | 17585405  | 17586530  |
| chr20 | 17948984  | 17949965  |
| chr20 | 17660766  | 17662666  |
| chr20 | 17549167  | 17551232  |
| chr20 | 17552326  | 17553146  |
| chr20 | 17585405  | 17586530  |
| chr20 | 17948984  | 17949965  |
| chr20 | 17660766  | 17662666  |
| chr20 | 19028614  | 19028817  |
| chr20 | 19697107  | 19697925  |
| chr20 | 19747482  | 19748440  |
| chr20 | 19764320  | 19765747  |
| chr20 | 20760932  | 20761614  |
| chr20 | 21586109  | 21586914  |
| chr20 | 22785442  | 22786439  |
| chr20 | 23248591  | 23249711  |
| chr20 | 23249060  | 23249267  |
| chr20 | 23900709  | 23901782  |
| chr20 | 23918660  | 23918663  |
| chr20 | 24369316  | 24370189  |

|       |          |          |
|-------|----------|----------|
| chr20 | 24630251 | 24631326 |
| chr20 | 24834743 | 24835861 |
| chr20 | 24844989 | 24846564 |
| chr20 | 24878538 | 24881154 |
| chr20 | 24921378 | 24922236 |
| chr20 | 24997553 | 24998920 |
| chr20 | 25145170 | 25146791 |
| chr20 | 25235748 | 25236525 |
| chr20 | 24834743 | 24835861 |
| chr20 | 24844989 | 24846564 |
| chr20 | 24878538 | 24881154 |
| chr20 | 24921378 | 24922236 |
| chr20 | 24997553 | 24998920 |
| chr20 | 25145170 | 25146791 |
| chr20 | 25235748 | 25236525 |
| chr20 | 25603406 | 25604137 |
| chr20 | 25603829 | 25604060 |
| chr20 | 26312950 | 26313182 |
| chr20 | 26313394 | 26313628 |
| chr20 | 26316010 | 26316239 |
| chr20 | 26316675 | 26316777 |
| chr20 | 26317041 | 26317279 |
| chr20 | 26317972 | 26318761 |
| chr20 | 29646150 | 29647077 |
| chr20 | 29651254 | 29654065 |
| chr20 | 29803752 | 29804496 |
| chr20 | 29824431 | 29826189 |
| chr20 | 29827719 | 29828908 |
| chr20 | 29816397 | 29819139 |
| chr20 | 30102545 | 30103487 |
| chr20 | 30154443 | 30155303 |
| chr20 | 30160096 | 30160901 |
| chr20 | 30182194 | 30182826 |
| chr20 | 30445599 | 30446418 |
| chr20 | 30696818 | 30697833 |
| chr20 | 30794435 | 30795456 |
| chr20 | 30445599 | 30446418 |
| chr20 | 30697139 | 30697833 |
| chr20 | 32320526 | 32320634 |
| chr20 | 36870731 | 36872043 |
| chr20 | 39519662 | 39521914 |
| chr20 | 39532168 | 39532874 |
| chr20 | 39533972 | 39535286 |

|       |          |          |
|-------|----------|----------|
| chr20 | 39548580 | 39549602 |
| chr20 | 39554635 | 39555373 |
| chr20 | 39569388 | 39570593 |
| chr20 | 39571730 | 39572670 |
| chr20 | 39574093 | 39575241 |
| chr20 | 39576894 | 39578994 |
| chr20 | 39585794 | 39587663 |
| chr20 | 39588963 | 39590739 |
| chr20 | 39591214 | 39592355 |
| chr20 | 39605121 | 39608293 |
| chr20 | 39643069 | 39644016 |
| chr20 | 39645378 | 39647324 |
| chr20 | 39656250 | 39658869 |
| chr20 | 39662313 | 39663357 |
| chr20 | 39670774 | 39672658 |
| chr20 | 39674377 | 39676086 |
| chr20 | 39686684 | 39687882 |
| chr20 | 39690439 | 39692985 |
| chr20 | 39698646 | 39699929 |
| chr20 | 39700350 | 39702205 |
| chr20 | 39704725 | 39705745 |
| chr20 | 39714870 | 39715883 |
| chr20 | 39723736 | 39724522 |
| chr20 | 39734523 | 39735770 |
| chr20 | 39739161 | 39740167 |
| chr20 | 39743031 | 39744747 |
| chr20 | 39749781 | 39750995 |
| chr20 | 39753102 | 39754019 |
| chr20 | 39754271 | 39755200 |
| chr20 | 39760034 | 39760713 |
| chr20 | 39768517 | 39772176 |
| chr20 | 39774871 | 39776211 |
| chr20 | 39777358 | 39778469 |
| chr20 | 39780966 | 39782061 |
| chr20 | 39798704 | 39800079 |
| chr20 | 39801777 | 39803413 |
| chr20 | 39807211 | 39809335 |
| chr20 | 39813726 | 39814757 |
| chr20 | 39817285 | 39822154 |
| chr20 | 39826496 | 39827928 |
| chr20 | 39832744 | 39834150 |
| chr20 | 39631296 | 39637567 |
| chr20 | 39649163 | 39650105 |



|       |          |          |
|-------|----------|----------|
| chr20 | 39681458 | 39684838 |
| chr20 | 39747513 | 39749131 |
| chr20 | 39762163 | 39768274 |
| chr20 | 39581975 | 39584315 |
| chr20 | 39634540 | 39634675 |
| chr20 | 39760034 | 39760713 |
| chr20 | 39768517 | 39772176 |
| chr20 | 39774871 | 39775820 |
| chr20 | 39762163 | 39768274 |
| chr20 | 39781731 | 39782061 |
| chr20 | 39798704 | 39800079 |
| chr20 | 39801777 | 39803413 |
| chr20 | 39807211 | 39809335 |
| chr20 | 39813726 | 39814757 |
| chr20 | 39967957 | 39968566 |
| chr20 | 39986276 | 39987360 |
| chr20 | 39999293 | 40000869 |
| chr20 | 40272387 | 40272643 |
| chr20 | 40274105 | 40275265 |
| chr20 | 40320928 | 40322325 |
| chr20 | 42437700 | 42438771 |
| chr20 | 43324575 | 43325526 |
| chr20 | 43357350 | 43358062 |
| chr20 | 43324575 | 43325526 |
| chr20 | 43357350 | 43358062 |
| chr20 | 43970549 | 43971766 |
| chr20 | 45336008 | 45336131 |
| chr20 | 45522545 | 45523980 |
| chr20 | 45584412 | 45585787 |
| chr20 | 45592210 | 45593505 |
| chr20 | 45705710 | 45705846 |
| chr20 | 45799618 | 45799774 |
| chr20 | 45819888 | 45820346 |
| chr20 | 45832810 | 45833359 |
| chr20 | 45942794 | 45951797 |
| chr20 | 46017015 | 46017216 |
| chr20 | 46288425 | 46296247 |
| chr20 | 46305687 | 46306894 |
| chr20 | 46462264 | 46463032 |
| chr20 | 46520531 | 46521687 |
| chr20 | 46523302 | 46525410 |
| chr20 | 46525961 | 46527043 |
| chr20 | 47125125 | 47133516 |

|       |          |          |
|-------|----------|----------|
| chr20 | 46466516 | 46519392 |
| chr20 | 47488559 | 47541103 |
| chr20 | 46319877 | 46456111 |
| chr20 | 46532921 | 46996909 |
| chr20 | 46997303 | 47122852 |
| chr20 | 47207971 | 47487386 |
| chr20 | 47133922 | 47204190 |
| chr20 | 46380235 | 46381109 |
| chr20 | 46388338 | 46395914 |
| chr20 | 46400939 | 46408133 |
| chr20 | 46414493 | 46415902 |
| chr20 | 46419226 | 46420015 |
| chr20 | 46443349 | 46443852 |
| chr20 | 46445341 | 46446627 |
| chr20 | 46471817 | 46481709 |
| chr20 | 46485904 | 46486679 |
| chr20 | 46488223 | 46489745 |
| chr20 | 46513203 | 46513751 |
| chr20 | 46514665 | 46517137 |
| chr20 | 46523439 | 46524161 |
| chr20 | 46524519 | 46524621 |
| chr20 | 46524632 | 46524751 |
| chr20 | 46534273 | 46536230 |
| chr20 | 46537859 | 46538380 |
| chr20 | 46543862 | 46548997 |
| chr20 | 46551609 | 46552782 |
| chr20 | 46568121 | 46568630 |
| chr20 | 46569332 | 46569846 |
| chr20 | 46569632 | 46569891 |
| chr20 | 46580786 | 46587610 |
| chr20 | 46589189 | 46589727 |
| chr20 | 46609059 | 46609268 |
| chr20 | 46609376 | 46610121 |
| chr20 | 46618804 | 46619856 |
| chr20 | 46630061 | 46652061 |
| chr20 | 46659478 | 46659679 |
| chr20 | 46666426 | 46675699 |
| chr20 | 46683624 | 46684773 |
| chr20 | 46707885 | 46708097 |
| chr20 | 46707896 | 46708897 |
| chr20 | 46723090 | 46740664 |
| chr20 | 46757750 | 46758290 |
| chr20 | 46769795 | 46769902 |

|       |          |          |
|-------|----------|----------|
| chr20 | 46773067 | 46787027 |
| chr20 | 46787703 | 46807587 |
| chr20 | 46815869 | 46816035 |
| chr20 | 46837136 | 46837777 |
| chr20 | 46840188 | 46841199 |
| chr20 | 46846058 | 46846714 |
| chr20 | 46858454 | 46863694 |
| chr20 | 46874298 | 46875241 |
| chr20 | 46877003 | 46877168 |
| chr20 | 46887334 | 46903952 |
| chr20 | 46910222 | 46933560 |
| chr20 | 46912517 | 46912727 |
| chr20 | 46925494 | 46925620 |
| chr20 | 46943097 | 46943309 |
| chr20 | 46955085 | 46955317 |
| chr20 | 46955208 | 46955325 |
| chr20 | 46955554 | 46956001 |
| chr20 | 46967974 | 46968991 |
| chr20 | 46970761 | 46972173 |
| chr20 | 46976438 | 46984485 |
| chr20 | 47038313 | 47040317 |
| chr20 | 47078520 | 47088266 |
| chr20 | 47131577 | 47132544 |
| chr20 | 47132671 | 47132981 |
| chr20 | 47139555 | 47140561 |
| chr20 | 47152200 | 47157355 |
| chr20 | 47164020 | 47164539 |
| chr20 | 47165936 | 47166943 |
| chr20 | 47171810 | 47172093 |
| chr20 | 47224609 | 47240966 |
| chr20 | 47247120 | 47259735 |
| chr20 | 47269150 | 47277877 |
| chr20 | 47294456 | 47310676 |
| chr20 | 47315244 | 47315365 |
| chr20 | 47315246 | 47325440 |
| chr20 | 47333508 | 47357896 |
| chr20 | 47365938 | 47366139 |
| chr20 | 47365942 | 47367023 |
| chr20 | 47373628 | 47378978 |
| chr20 | 47390733 | 47391784 |
| chr20 | 47406910 | 47408464 |
| chr20 | 47408422 | 47408624 |
| chr20 | 47418526 | 47429371 |

|       |          |          |
|-------|----------|----------|
| chr20 | 47430547 | 47450805 |
| chr20 | 47443652 | 47443855 |
| chr20 | 47443986 | 47444360 |
| chr20 | 47444888 | 47445839 |
| chr20 | 47447127 | 47447337 |
| chr20 | 47451999 | 47452527 |
| chr20 | 47460920 | 47461532 |
| chr20 | 47470390 | 47470492 |
| chr20 | 47471705 | 47471943 |
| chr20 | 47474822 | 47474942 |
| chr20 | 47502773 | 47503783 |
| chr20 | 47509385 | 47509610 |
| chr20 | 47515638 | 47516640 |
| chr20 | 47521234 | 47521373 |
| chr20 | 47536153 | 47537087 |
| chr20 | 47537591 | 47538091 |
| chr20 | 47826570 | 47827434 |
| chr20 | 47892814 | 47893922 |
| chr20 | 47894814 | 47899984 |
| chr20 | 47901914 | 47904680 |
| chr20 | 47905186 | 47906273 |
| chr20 | 47936688 | 47937617 |
| chr20 | 47941129 | 47942564 |
| chr20 | 48063182 | 48064000 |
| chr20 | 48118107 | 48118928 |
| chr20 | 48162203 | 48163189 |
| chr20 | 48171463 | 48173750 |
| chr20 | 48200500 | 48201587 |
| chr20 | 48224590 | 48226089 |
| chr20 | 48241629 | 48242730 |
| chr20 | 48036989 | 48038140 |
| chr20 | 47936688 | 47937617 |
| chr20 | 48384694 | 48385451 |
| chr20 | 48503147 | 48506575 |
| chr20 | 48507036 | 48508873 |
| chr20 | 48530782 | 48531566 |
| chr20 | 48551423 | 48556509 |
| chr20 | 48557842 | 48559109 |
| chr20 | 48564950 | 48566392 |
| chr20 | 48568218 | 48570793 |
| chr20 | 48580852 | 48582899 |
| chr20 | 48583279 | 48585935 |
| chr20 | 48586281 | 48587935 |

|       |          |          |
|-------|----------|----------|
| chr20 | 48589348 | 48591166 |
| chr20 | 48605303 | 48607494 |
| chr20 | 48613860 | 48615461 |
| chr20 | 48617559 | 48618808 |
| chr20 | 48619572 | 48620665 |
| chr20 | 48626158 | 48627687 |
| chr20 | 48628542 | 48629253 |
| chr20 | 48630455 | 48631857 |
| chr20 | 48633683 | 48634761 |
| chr20 | 48635567 | 48638244 |
| chr20 | 48639053 | 48640785 |
| chr20 | 48645379 | 48647641 |
| chr20 | 48648904 | 48650363 |
| chr20 | 48653129 | 48658614 |
| chr20 | 48659044 | 48659883 |
| chr20 | 48662806 | 48666273 |
| chr20 | 48669860 | 48671549 |
| chr20 | 48680949 | 48682079 |
| chr20 | 48683717 | 48685087 |
| chr20 | 48687202 | 48688736 |
| chr20 | 48697131 | 48698467 |
| chr20 | 48699323 | 48700272 |
| chr20 | 48701525 | 48705249 |
| chr20 | 48706565 | 48707417 |
| chr20 | 48711672 | 48712705 |
| chr20 | 48716449 | 48719240 |
| chr20 | 48734592 | 48742110 |
| chr20 | 48742455 | 48746508 |
| chr20 | 48748878 | 48750055 |
| chr20 | 48754216 | 48756078 |
| chr20 | 48764796 | 48772879 |
| chr20 | 48778589 | 48781553 |
| chr20 | 48781902 | 48784358 |
| chr20 | 48784650 | 48788207 |
| chr20 | 48797149 | 48798456 |
| chr20 | 48821999 | 48823325 |
| chr20 | 48831893 | 48832826 |
| chr20 | 48845165 | 48846560 |
| chr20 | 48847150 | 48850352 |
| chr20 | 48865427 | 48868484 |
| chr20 | 48875894 | 48878097 |
| chr20 | 48879924 | 48885522 |
| chr20 | 48892129 | 48903882 |

|       |          |          |
|-------|----------|----------|
| chr20 | 48961005 | 48965402 |
| chr20 | 48979386 | 48981381 |
| chr20 | 48983568 | 48986159 |
| chr20 | 48990926 | 48992260 |
| chr20 | 48992842 | 48999629 |
| chr20 | 49001558 | 49003465 |
| chr20 | 49007151 | 49008528 |
| chr20 | 49012480 | 49019606 |
| chr20 | 49025159 | 49032385 |
| chr20 | 49055404 | 49060252 |
| chr20 | 49061877 | 49064761 |
| chr20 | 49065550 | 49068586 |
| chr20 | 49072558 | 49074612 |
| chr20 | 49076406 | 49079824 |
| chr20 | 49080068 | 49081873 |
| chr20 | 49082664 | 49085825 |
| chr20 | 49091720 | 49095637 |
| chr20 | 49107673 | 49112437 |
| chr20 | 49112970 | 49115184 |
| chr20 | 49115906 | 49117367 |
| chr20 | 49121549 | 49123742 |
| chr20 | 49144003 | 49145024 |
| chr20 | 49145315 | 49146443 |
| chr20 | 49147100 | 49150166 |
| chr20 | 49157569 | 49160404 |
| chr20 | 49162318 | 49167795 |
| chr20 | 49168459 | 49178631 |
| chr20 | 49192137 | 49194558 |
| chr20 | 49195986 | 49197302 |
| chr20 | 49208561 | 49209984 |
| chr20 | 49212007 | 49213719 |
| chr20 | 49214939 | 49217510 |
| chr20 | 49217762 | 49220451 |
| chr20 | 49220658 | 49223063 |
| chr20 | 49224259 | 49225946 |
| chr20 | 49226449 | 49228104 |
| chr20 | 49228370 | 49229753 |
| chr20 | 49230923 | 49233028 |
| chr20 | 49236853 | 49240088 |
| chr20 | 49240487 | 49245980 |
| chr20 | 49258007 | 49259761 |
| chr20 | 49260602 | 49263842 |
| chr20 | 49269017 | 49271639 |

|       |          |          |
|-------|----------|----------|
| chr20 | 49271860 | 49274153 |
| chr20 | 49274374 | 49281451 |
| chr20 | 48561420 | 48563266 |
| chr20 | 48594081 | 48603250 |
| chr20 | 48643726 | 48644744 |
| chr20 | 48692889 | 48693707 |
| chr20 | 48723261 | 48733577 |
| chr20 | 48774154 | 48777539 |
| chr20 | 48791297 | 48795328 |
| chr20 | 48800220 | 48821752 |
| chr20 | 48824292 | 48825544 |
| chr20 | 48833137 | 48844035 |
| chr20 | 48851020 | 48865178 |
| chr20 | 48872003 | 48875061 |
| chr20 | 48904323 | 48917071 |
| chr20 | 48917711 | 48960163 |
| chr20 | 48969512 | 48978193 |
| chr20 | 48988030 | 48990395 |
| chr20 | 49004330 | 49006596 |
| chr20 | 49032762 | 49044906 |
| chr20 | 49045321 | 49054325 |
| chr20 | 49069027 | 49071852 |
| chr20 | 49086094 | 49090794 |
| chr20 | 49097842 | 49106427 |
| chr20 | 49117995 | 49121340 |
| chr20 | 49124280 | 49136401 |
| chr20 | 49180076 | 49191544 |
| chr20 | 49198386 | 49208311 |
| chr20 | 49233711 | 49235651 |
| chr20 | 49249628 | 49254172 |
| chr20 | 49265778 | 49268465 |
| chr20 | 48757395 | 48764584 |
| chr20 | 48886646 | 48890026 |
| chr20 | 49019939 | 49022220 |
| chr20 | 49150607 | 49156482 |
| chr20 | 49282772 | 49356669 |
| chr20 | 48626158 | 48626506 |
| chr20 | 48627021 | 48627339 |
| chr20 | 48636800 | 48637013 |
| chr20 | 48701882 | 48702146 |
| chr20 | 48749283 | 48749408 |
| chr20 | 48770696 | 48770818 |
| chr20 | 48770708 | 48770951 |

|       |          |          |
|-------|----------|----------|
| chr20 | 48959835 | 48959972 |
| chr20 | 48964222 | 48964427 |
| chr20 | 48996704 | 48997072 |
| chr20 | 49055915 | 49056131 |
| chr20 | 49080786 | 49080954 |
| chr20 | 49109087 | 49109188 |
| chr20 | 49421123 | 49422135 |
| chr20 | 49434739 | 49435256 |
| chr20 | 49464814 | 49466284 |
| chr20 | 49471519 | 49473317 |
| chr20 | 49545159 | 49546194 |
| chr20 | 49564141 | 49565264 |
| chr20 | 49570435 | 49571299 |
| chr20 | 49574017 | 49576814 |
| chr20 | 49579379 | 49580499 |
| chr20 | 49582644 | 49583929 |
| chr20 | 49588009 | 49588834 |
| chr20 | 49597619 | 49599823 |
| chr20 | 49609694 | 49610751 |
| chr20 | 49611774 | 49613230 |
| chr20 | 49631049 | 49632370 |
| chr20 | 49633015 | 49633892 |
| chr20 | 49637674 | 49639420 |
| chr20 | 49640242 | 49641713 |
| chr20 | 49645081 | 49646422 |
| chr20 | 49662469 | 49663699 |
| chr20 | 49667814 | 49668628 |
| chr20 | 49672448 | 49673424 |
| chr20 | 49683504 | 49684719 |
| chr20 | 49687773 | 49689257 |
| chr20 | 49698442 | 49699699 |
| chr20 | 49711522 | 49712767 |
| chr20 | 49737907 | 49740095 |
| chr20 | 49742772 | 49744170 |
| chr20 | 49750486 | 49751305 |
| chr20 | 49767693 | 49768740 |
| chr20 | 49771118 | 49773062 |
| chr20 | 49775562 | 49779450 |
| chr20 | 49784541 | 49786764 |
| chr20 | 49787646 | 49790410 |
| chr20 | 49791075 | 49793186 |
| chr20 | 49799348 | 49800774 |
| chr20 | 49808454 | 49810161 |



|       |          |          |
|-------|----------|----------|
| chr20 | 49811771 | 49812611 |
| chr20 | 49813253 | 49815217 |
| chr20 | 49817317 | 49818132 |
| chr20 | 49818649 | 49820063 |
| chr20 | 49821617 | 49822552 |
| chr20 | 49827503 | 49829155 |
| chr20 | 49830882 | 49832063 |
| chr20 | 49842686 | 49844734 |
| chr20 | 49862349 | 49863456 |
| chr20 | 49863831 | 49865230 |
| chr20 | 49866814 | 49871072 |
| chr20 | 49875420 | 49877418 |
| chr20 | 49878202 | 49880388 |
| chr20 | 49880853 | 49883551 |
| chr20 | 49883945 | 49888747 |
| chr20 | 49889345 | 49890447 |
| chr20 | 49892424 | 49894867 |
| chr20 | 49896576 | 49900728 |
| chr20 | 49907888 | 49909326 |
| chr20 | 49910311 | 49912072 |
| chr20 | 49912345 | 49913332 |
| chr20 | 49927799 | 49930789 |
| chr20 | 49932405 | 49936825 |
| chr20 | 49939044 | 49940872 |
| chr20 | 49941393 | 49943474 |
| chr20 | 49944015 | 49945230 |
| chr20 | 49946694 | 49948118 |
| chr20 | 49958608 | 49962150 |
| chr20 | 49962404 | 49963254 |
| chr20 | 49963701 | 49965396 |
| chr20 | 49971640 | 49973072 |
| chr20 | 49980139 | 49981102 |
| chr20 | 49982487 | 49983472 |
| chr20 | 50000160 | 50001660 |
| chr20 | 50006630 | 50008188 |
| chr20 | 50014713 | 50017239 |
| chr20 | 50022638 | 50023395 |
| chr20 | 50026928 | 50028243 |
| chr20 | 50038339 | 50039344 |
| chr20 | 50040061 | 50042198 |
| chr20 | 50053314 | 50054204 |
| chr20 | 50058911 | 50060724 |
| chr20 | 50062571 | 50065074 |

|       |          |          |
|-------|----------|----------|
| chr20 | 50072620 | 50074408 |
| chr20 | 50076895 | 50078769 |
| chr20 | 50086982 | 50088129 |
| chr20 | 50094109 | 50097690 |
| chr20 | 50100692 | 50102144 |
| chr20 | 50103738 | 50104730 |
| chr20 | 50106092 | 50107463 |
| chr20 | 50123321 | 50124861 |
| chr20 | 50138872 | 50139982 |
| chr20 | 50149128 | 50149987 |
| chr20 | 50157688 | 50160317 |
| chr20 | 50160844 | 50161762 |
| chr20 | 50162615 | 50164447 |
| chr20 | 50166004 | 50166845 |
| chr20 | 50170201 | 50171916 |
| chr20 | 50173741 | 50177600 |
| chr20 | 50178208 | 50181439 |
| chr20 | 50181990 | 50183019 |
| chr20 | 50185106 | 50188203 |
| chr20 | 50189651 | 50194468 |
| chr20 | 50203247 | 50204272 |
| chr20 | 50207682 | 50209176 |
| chr20 | 50209674 | 50212525 |
| chr20 | 50212784 | 50213948 |
| chr20 | 50214815 | 50215630 |
| chr20 | 50221136 | 50221856 |
| chr20 | 50222678 | 50224329 |
| chr20 | 50229635 | 50231530 |
| chr20 | 50236435 | 50238598 |
| chr20 | 50240207 | 50243137 |
| chr20 | 50254614 | 50257703 |
| chr20 | 50259117 | 50260595 |
| chr20 | 50261946 | 50263335 |
| chr20 | 50264065 | 50265785 |
| chr20 | 50268254 | 50274846 |
| chr20 | 50276098 | 50278918 |
| chr20 | 50283300 | 50284626 |
| chr20 | 50285067 | 50287909 |
| chr20 | 50289022 | 50289825 |
| chr20 | 50291825 | 50293265 |
| chr20 | 50293632 | 50294426 |
| chr20 | 49577980 | 49579120 |
| chr20 | 49593374 | 49595229 |

|       |          |          |
|-------|----------|----------|
| chr20 | 49725297 | 49726324 |
| chr20 | 49757714 | 49762658 |
| chr20 | 49832349 | 49841156 |
| chr20 | 49855164 | 49860651 |
| chr20 | 49871350 | 49875038 |
| chr20 | 49905383 | 49906749 |
| chr20 | 49913718 | 49926988 |
| chr20 | 49970185 | 49971432 |
| chr20 | 50018533 | 50021567 |
| chr20 | 50117396 | 50118981 |
| chr20 | 50151038 | 50155635 |
| chr20 | 50216189 | 50217646 |
| chr20 | 50281485 | 50282964 |
| chr20 | 49547482 | 49549305 |
| chr20 | 50066706 | 50072238 |
| chr20 | 50195581 | 50200846 |
| chr20 | 49570435 | 49571299 |
| chr20 | 49574017 | 49576814 |
| chr20 | 49579379 | 49580499 |
| chr20 | 49582644 | 49583929 |
| chr20 | 49588009 | 49588834 |
| chr20 | 49597619 | 49599823 |
| chr20 | 49609694 | 49610751 |
| chr20 | 49611774 | 49613230 |
| chr20 | 49631049 | 49632370 |
| chr20 | 49633015 | 49633892 |
| chr20 | 49637674 | 49639420 |
| chr20 | 49640242 | 49641713 |
| chr20 | 49645081 | 49646422 |
| chr20 | 49662469 | 49663699 |
| chr20 | 49667814 | 49668628 |
| chr20 | 49672448 | 49673424 |
| chr20 | 49683504 | 49684719 |
| chr20 | 49687773 | 49689257 |
| chr20 | 49698442 | 49699699 |
| chr20 | 49711522 | 49712767 |
| chr20 | 49737907 | 49740095 |
| chr20 | 49742772 | 49744170 |
| chr20 | 49750486 | 49751305 |
| chr20 | 49767693 | 49768740 |
| chr20 | 49771118 | 49773062 |
| chr20 | 49775562 | 49779450 |
| chr20 | 49784541 | 49786764 |

|       |          |          |
|-------|----------|----------|
| chr20 | 49787646 | 49790410 |
| chr20 | 49791075 | 49793186 |
| chr20 | 49799348 | 49800774 |
| chr20 | 49808454 | 49810161 |
| chr20 | 49811771 | 49812611 |
| chr20 | 49813253 | 49815217 |
| chr20 | 49817317 | 49818132 |
| chr20 | 49818649 | 49820063 |
| chr20 | 49821617 | 49822552 |
| chr20 | 49827503 | 49829155 |
| chr20 | 49830882 | 49832063 |
| chr20 | 49842686 | 49844734 |
| chr20 | 49862349 | 49863456 |
| chr20 | 49863831 | 49865230 |
| chr20 | 49866814 | 49871072 |
| chr20 | 49875420 | 49877418 |
| chr20 | 49878202 | 49880388 |
| chr20 | 49880853 | 49883551 |
| chr20 | 49883945 | 49888747 |
| chr20 | 49889345 | 49890447 |
| chr20 | 49892424 | 49894867 |
| chr20 | 49896576 | 49900728 |
| chr20 | 49907888 | 49909326 |
| chr20 | 49910311 | 49912072 |
| chr20 | 49912345 | 49913332 |
| chr20 | 49927799 | 49930789 |
| chr20 | 49932405 | 49936825 |
| chr20 | 49939044 | 49940872 |
| chr20 | 49941393 | 49943474 |
| chr20 | 49944015 | 49945230 |
| chr20 | 49946694 | 49948118 |
| chr20 | 49958608 | 49962150 |
| chr20 | 49962404 | 49963254 |
| chr20 | 49963701 | 49965396 |
| chr20 | 49971640 | 49973072 |
| chr20 | 49980139 | 49981102 |
| chr20 | 49982487 | 49983472 |
| chr20 | 50000160 | 50001660 |
| chr20 | 50006630 | 50008188 |
| chr20 | 50014713 | 50017239 |
| chr20 | 50022638 | 50023395 |
| chr20 | 50026928 | 50028243 |
| chr20 | 50038339 | 50039344 |

|       |          |          |
|-------|----------|----------|
| chr20 | 50040061 | 50042198 |
| chr20 | 50053314 | 50054204 |
| chr20 | 50058911 | 50060724 |
| chr20 | 50062571 | 50065074 |
| chr20 | 50072620 | 50074408 |
| chr20 | 50076895 | 50078769 |
| chr20 | 50086982 | 50088129 |
| chr20 | 50094109 | 50097690 |
| chr20 | 50100692 | 50102144 |
| chr20 | 50103738 | 50104730 |
| chr20 | 50106092 | 50107463 |
| chr20 | 50123321 | 50124861 |
| chr20 | 50138872 | 50139982 |
| chr20 | 50149128 | 50149987 |
| chr20 | 50157688 | 50160317 |
| chr20 | 50160844 | 50161762 |
| chr20 | 50162615 | 50164447 |
| chr20 | 50166004 | 50166845 |
| chr20 | 50170201 | 50171916 |
| chr20 | 50173741 | 50177600 |
| chr20 | 50178208 | 50181439 |
| chr20 | 50181990 | 50183019 |
| chr20 | 50185106 | 50188203 |
| chr20 | 50189651 | 50194468 |
| chr20 | 50203247 | 50204272 |
| chr20 | 50207682 | 50209176 |
| chr20 | 50209674 | 50212525 |
| chr20 | 50212784 | 50213948 |
| chr20 | 50214815 | 50215630 |
| chr20 | 50221136 | 50221856 |
| chr20 | 50222678 | 50224329 |
| chr20 | 50229635 | 50231530 |
| chr20 | 50236435 | 50238598 |
| chr20 | 50240207 | 50243137 |
| chr20 | 50254614 | 50257703 |
| chr20 | 50259117 | 50260595 |
| chr20 | 50261946 | 50263335 |
| chr20 | 50264065 | 50265785 |
| chr20 | 50268254 | 50274846 |
| chr20 | 50276098 | 50278918 |
| chr20 | 50283300 | 50284626 |
| chr20 | 50285067 | 50287909 |
| chr20 | 50289022 | 50289825 |

|       |          |          |
|-------|----------|----------|
| chr20 | 50291825 | 50293265 |
| chr20 | 50293632 | 50298063 |
| chr20 | 50304652 | 50306115 |
| chr20 | 50316878 | 50324606 |
| chr20 | 50325875 | 50330003 |
| chr20 | 49577980 | 49579120 |
| chr20 | 49593374 | 49595229 |
| chr20 | 49725297 | 49726324 |
| chr20 | 49757714 | 49762658 |
| chr20 | 49832349 | 49841156 |
| chr20 | 49855164 | 49860651 |
| chr20 | 49871350 | 49875038 |
| chr20 | 49905383 | 49906749 |
| chr20 | 49913718 | 49926988 |
| chr20 | 49970185 | 49971432 |
| chr20 | 50018533 | 50021567 |
| chr20 | 50117396 | 50118981 |
| chr20 | 50151038 | 50155635 |
| chr20 | 50216189 | 50217646 |
| chr20 | 50281485 | 50282964 |
| chr20 | 50306721 | 50316371 |
| chr20 | 50066706 | 50072238 |
| chr20 | 50195581 | 50200846 |
| chr20 | 50330852 | 50333676 |
| chr20 | 49699374 | 49699699 |
| chr20 | 49712047 | 49712169 |
| chr20 | 49725622 | 49725833 |
| chr20 | 49761829 | 49762094 |
| chr20 | 49906358 | 49906548 |
| chr20 | 49963701 | 49963928 |
| chr20 | 49963954 | 49964170 |
| chr20 | 50155304 | 50155533 |
| chr20 | 50157688 | 50157713 |
| chr20 | 50157867 | 50158042 |
| chr20 | 50158235 | 50158931 |
| chr20 | 50159299 | 50160286 |
| chr20 | 50367444 | 50367728 |
| chr20 | 50384159 | 50384599 |
| chr20 | 50385172 | 50385998 |
| chr20 | 50415330 | 50419798 |
| chr20 | 50807482 | 50807955 |
| chr20 | 50807676 | 50807892 |
| chr20 | 50808739 | 50808791 |

|       |          |          |
|-------|----------|----------|
| chr20 | 52216004 | 52216510 |
| chr20 | 52238672 | 52238782 |
| chr20 | 52364828 | 52365088 |
| chr20 | 52850510 | 52857441 |
| chr20 | 52471503 | 52849921 |
| chr20 | 52458558 | 52471233 |
| chr20 | 52515660 | 52515928 |
| chr20 | 52543162 | 52543262 |
| chr20 | 52857673 | 52858232 |
| chr20 | 52850510 | 52857441 |
| chr20 | 52608931 | 52849921 |
| chr20 | 52700752 | 52700872 |
| chr20 | 52788800 | 52790969 |
| chr20 | 52909497 | 52909603 |
| chr20 | 52931102 | 52931448 |
| chr20 | 52932697 | 52933342 |
| chr20 | 53091159 | 53091410 |
| chr20 | 53091661 | 53091823 |
| chr20 | 53092030 | 53093610 |
| chr20 | 54579935 | 54581121 |
| chr20 | 54665797 | 54666910 |
| chr20 | 54667376 | 54668297 |
| chr20 | 54702367 | 54703283 |
| chr20 | 54715981 | 54718290 |
| chr20 | 54737050 | 54737905 |
| chr20 | 54747988 | 54749281 |
| chr20 | 54756323 | 54757507 |
| chr20 | 54772927 | 54774390 |
| chr20 | 54774852 | 54776824 |
| chr20 | 54780902 | 54781978 |
| chr20 | 54792160 | 54793051 |
| chr20 | 54794299 | 54796834 |
| chr20 | 54824170 | 54825466 |
| chr20 | 54827978 | 54829612 |
| chr20 | 54840056 | 54841530 |
| chr20 | 54871561 | 54872618 |
| chr20 | 54887223 | 54888537 |
| chr20 | 54888809 | 54890245 |
| chr20 | 54903388 | 54904435 |
| chr20 | 54906054 | 54908029 |
| chr20 | 54910281 | 54911861 |
| chr20 | 54965984 | 54968301 |
| chr20 | 54973402 | 54974531 |

|       |          |          |
|-------|----------|----------|
| chr20 | 54917594 | 54919962 |
| chr20 | 54918100 | 54918202 |
| chr20 | 54918102 | 54918322 |
| chr20 | 54918426 | 54918687 |
| chr20 | 54919308 | 54919526 |
| chr20 | 55026694 | 55027233 |
| chr20 | 55116259 | 55117047 |
| chr20 | 55129491 | 55130797 |
| chr20 | 55141190 | 55142314 |
| chr20 | 55166798 | 55168499 |
| chr20 | 55183624 | 55185657 |
| chr20 | 55202656 | 55207576 |
| chr20 | 55208490 | 55209319 |
| chr20 | 55231028 | 55232214 |
| chr20 | 55257579 | 55259042 |
| chr20 | 55272517 | 55274082 |
| chr20 | 55286116 | 55287363 |
| chr20 | 55293827 | 55294722 |
| chr20 | 55297697 | 55298613 |
| chr20 | 55300545 | 55301384 |
| chr20 | 55308416 | 55311315 |
| chr20 | 55314179 | 55316134 |
| chr20 | 55323616 | 55325204 |
| chr20 | 55332984 | 55334939 |
| chr20 | 55335535 | 55336773 |
| chr20 | 55347106 | 55348115 |
| chr20 | 55353789 | 55355009 |
| chr20 | 55368148 | 55369095 |
| chr20 | 55370923 | 55372254 |
| chr20 | 55372694 | 55375494 |
| chr20 | 55378837 | 55381789 |
| chr20 | 55384130 | 55385604 |
| chr20 | 55386080 | 55394101 |
| chr20 | 55395185 | 55396842 |
| chr20 | 55400019 | 55401079 |
| chr20 | 55401451 | 55405491 |
| chr20 | 55416440 | 55420495 |
| chr20 | 55425088 | 55426738 |
| chr20 | 55431720 | 55433569 |
| chr20 | 55434308 | 55437603 |
| chr20 | 55439137 | 55439941 |
| chr20 | 55448184 | 55451273 |
| chr20 | 55452288 | 55453409 |



|       |          |          |
|-------|----------|----------|
| chr20 | 55467874 | 55469421 |
| chr20 | 55474424 | 55475868 |
| chr20 | 55477188 | 55478146 |
| chr20 | 55478625 | 55479675 |
| chr20 | 55479909 | 55481150 |
| chr20 | 55483418 | 55486272 |
| chr20 | 55486951 | 55487818 |
| chr20 | 55489377 | 55490893 |
| chr20 | 55491411 | 55492273 |
| chr20 | 55496389 | 55499239 |
| chr20 | 55500911 | 55503291 |
| chr20 | 55514587 | 55517272 |
| chr20 | 55517673 | 55519214 |
| chr20 | 55521044 | 55522896 |
| chr20 | 55529759 | 55531085 |
| chr20 | 55545870 | 55547178 |
| chr20 | 55547876 | 55550904 |
| chr20 | 55551222 | 55552049 |
| chr20 | 55577282 | 55583591 |
| chr20 | 55584841 | 55585875 |
| chr20 | 55594574 | 55596031 |
| chr20 | 55633002 | 55638802 |
| chr20 | 55658567 | 55660153 |
| chr20 | 55661440 | 55669407 |
| chr20 | 55670950 | 55672428 |
| chr20 | 55673281 | 55674174 |
| chr20 | 55857070 | 55859550 |
| chr20 | 55872341 | 55874270 |
| chr20 | 55874780 | 55884936 |
| chr20 | 55891931 | 55899679 |
| chr20 | 55906882 | 55908964 |
| chr20 | 55910961 | 55912836 |
| chr20 | 55914111 | 55915531 |
| chr20 | 55920493 | 55923275 |
| chr20 | 55924196 | 55927774 |
| chr20 | 55928275 | 55932058 |
| chr20 | 55938460 | 55940403 |
| chr20 | 55943293 | 55944710 |
| chr20 | 55945864 | 55947095 |
| chr20 | 55952413 | 55953504 |
| chr20 | 55954191 | 55956088 |
| chr20 | 55956365 | 55957918 |
| chr20 | 55970835 | 55973228 |

|       |          |          |
|-------|----------|----------|
| chr20 | 55973823 | 55977473 |
| chr20 | 55980572 | 55981718 |
| chr20 | 55984547 | 55985840 |
| chr20 | 55988419 | 55990633 |
| chr20 | 55991276 | 55994484 |
| chr20 | 55995272 | 55997604 |
| chr20 | 56003239 | 56005087 |
| chr20 | 56006553 | 56016558 |
| chr20 | 56017659 | 56021745 |
| chr20 | 56022278 | 56025734 |
| chr20 | 56025997 | 56027327 |
| chr20 | 56028653 | 56029475 |
| chr20 | 56059635 | 56061345 |
| chr20 | 56062116 | 56065033 |
| chr20 | 56066303 | 56072676 |
| chr20 | 56073283 | 56074193 |
| chr20 | 56076305 | 56079140 |
| chr20 | 56086800 | 56089720 |
| chr20 | 56090173 | 56091817 |
| chr20 | 56101901 | 56105264 |
| chr20 | 56120891 | 56129968 |
| chr20 | 56131598 | 56146405 |
| chr20 | 56175462 | 56178911 |
| chr20 | 56179491 | 56180426 |
| chr20 | 56184204 | 56186882 |
| chr20 | 56189462 | 56190491 |
| chr20 | 56192199 | 56195027 |
| chr20 | 56204714 | 56205906 |
| chr20 | 56206161 | 56207687 |
| chr20 | 56221424 | 56222633 |
| chr20 | 56230991 | 56231768 |
| chr20 | 56237795 | 56238919 |
| chr20 | 56247441 | 56251569 |
| chr20 | 56253471 | 56254854 |
| chr20 | 56255393 | 56257139 |
| chr20 | 56264417 | 56266758 |
| chr20 | 56267221 | 56275240 |
| chr20 | 56287495 | 56289247 |
| chr20 | 56302431 | 56309994 |
| chr20 | 56316782 | 56327436 |
| chr20 | 56329985 | 56333983 |
| chr20 | 56335076 | 56341140 |
| chr20 | 56352809 | 56355517 |

|       |          |          |
|-------|----------|----------|
| chr20 | 56356019 | 56360768 |
| chr20 | 56361245 | 56364354 |
| chr20 | 56365104 | 56370058 |
| chr20 | 56370802 | 56371648 |
| chr20 | 56372643 | 56375280 |
| chr20 | 56378198 | 56379372 |
| chr20 | 56380333 | 56382535 |
| chr20 | 56382976 | 56387244 |
| chr20 | 56399207 | 56401382 |
| chr20 | 56405972 | 56408845 |
| chr20 | 56415682 | 56417381 |
| chr20 | 56418438 | 56422517 |
| chr20 | 56423243 | 56424165 |
| chr20 | 56430912 | 56433787 |
| chr20 | 56434130 | 56436739 |
| chr20 | 56437904 | 56439936 |
| chr20 | 56444481 | 56445750 |
| chr20 | 56446224 | 56448659 |
| chr20 | 56451020 | 56458227 |
| chr20 | 56466144 | 56470794 |
| chr20 | 56471032 | 56473939 |
| chr20 | 56476294 | 56477972 |
| chr20 | 56479258 | 56481328 |
| chr20 | 56485128 | 56486603 |
| chr20 | 56486926 | 56488480 |
| chr20 | 56497559 | 56498869 |
| chr20 | 56499450 | 56503219 |
| chr20 | 56514336 | 56517240 |
| chr20 | 56520338 | 56523382 |
| chr20 | 56528651 | 56534738 |
| chr20 | 56537338 | 56539963 |
| chr20 | 56541980 | 56546819 |
| chr20 | 56547456 | 56548480 |
| chr20 | 56548754 | 56551896 |
| chr20 | 56552134 | 56553092 |
| chr20 | 56554837 | 56557049 |
| chr20 | 56557949 | 56558928 |
| chr20 | 56577734 | 56579494 |
| chr20 | 56582028 | 56584374 |
| chr20 | 56585156 | 56587208 |
| chr20 | 56587708 | 56589083 |
| chr20 | 56608074 | 56610658 |
| chr20 | 56610973 | 56616082 |

|       |          |          |
|-------|----------|----------|
| chr20 | 56617197 | 56618707 |
| chr20 | 56619058 | 56620494 |
| chr20 | 56631806 | 56635371 |
| chr20 | 56643289 | 56645534 |
| chr20 | 56647388 | 56653162 |
| chr20 | 56656308 | 56658004 |
| chr20 | 56659246 | 56661719 |
| chr20 | 56661931 | 56668349 |
| chr20 | 56669784 | 56671491 |
| chr20 | 56674274 | 56676348 |
| chr20 | 56677421 | 56679849 |
| chr20 | 56680211 | 56685199 |
| chr20 | 56690203 | 56697856 |
| chr20 | 56699318 | 56702190 |
| chr20 | 56730087 | 56733192 |
| chr20 | 56733709 | 56737478 |
| chr20 | 56739417 | 56743696 |
| chr20 | 56744570 | 56747064 |
| chr20 | 56749140 | 56751363 |
| chr20 | 56756530 | 56762374 |
| chr20 | 56778422 | 56779803 |
| chr20 | 56784122 | 56785842 |
| chr20 | 56787585 | 56789091 |
| chr20 | 56790696 | 56797728 |
| chr20 | 56804633 | 56808045 |
| chr20 | 56808939 | 56813544 |
| chr20 | 56813834 | 56814710 |
| chr20 | 56816190 | 56818666 |
| chr20 | 56842322 | 56846090 |
| chr20 | 56847003 | 56850867 |
| chr20 | 56852506 | 56853963 |
| chr20 | 55213461 | 55214460 |
| chr20 | 55262767 | 55266028 |
| chr20 | 55325817 | 55328832 |
| chr20 | 55360652 | 55364502 |
| chr20 | 55376688 | 55378371 |
| chr20 | 55407789 | 55411663 |
| chr20 | 55459736 | 55460706 |
| chr20 | 55507616 | 55514259 |
| chr20 | 55524520 | 55528466 |
| chr20 | 55533781 | 55545633 |
| chr20 | 55554757 | 55567235 |
| chr20 | 55587272 | 55593123 |

|       |          |          |
|-------|----------|----------|
| chr20 | 55596356 | 55620441 |
| chr20 | 55620679 | 55632302 |
| chr20 | 55639485 | 55640970 |
| chr20 | 55642889 | 55657886 |
| chr20 | 55862418 | 55870317 |
| chr20 | 55885370 | 55891133 |
| chr20 | 55900205 | 55906557 |
| chr20 | 55915816 | 55919093 |
| chr20 | 55934852 | 55937120 |
| chr20 | 55982148 | 55984317 |
| chr20 | 55998350 | 56002499 |
| chr20 | 56030027 | 56044185 |
| chr20 | 56044854 | 56051741 |
| chr20 | 56079451 | 56085798 |
| chr20 | 56105708 | 56119838 |
| chr20 | 56146824 | 56153186 |
| chr20 | 56154656 | 56175100 |
| chr20 | 56196656 | 56202942 |
| chr20 | 56209310 | 56220992 |
| chr20 | 56260465 | 56263886 |
| chr20 | 56277428 | 56287010 |
| chr20 | 56289455 | 56296389 |
| chr20 | 56310269 | 56316498 |
| chr20 | 56328160 | 56329680 |
| chr20 | 56344416 | 56352211 |
| chr20 | 56388662 | 56397601 |
| chr20 | 56410101 | 56411771 |
| chr20 | 56425879 | 56426817 |
| chr20 | 56440382 | 56443905 |
| chr20 | 56503767 | 56513434 |
| chr20 | 56540206 | 56541641 |
| chr20 | 56560823 | 56576321 |
| chr20 | 56589298 | 56601236 |
| chr20 | 56601969 | 56607669 |
| chr20 | 56636712 | 56639914 |
| chr20 | 56653794 | 56656068 |
| chr20 | 56685976 | 56689861 |
| chr20 | 56702749 | 56714915 |
| chr20 | 56715144 | 56726271 |
| chr20 | 56763037 | 56772366 |
| chr20 | 56799932 | 56803767 |
| chr20 | 56819661 | 56842101 |
| chr20 | 55181030 | 55182561 |

|       |          |          |
|-------|----------|----------|
| chr20 | 55311951 | 55312739 |
| chr20 | 55441635 | 55443967 |
| chr20 | 55674816 | 55855608 |
| chr20 | 55962434 | 55969683 |
| chr20 | 56093299 | 56099702 |
| chr20 | 56224274 | 56230180 |
| chr20 | 56489571 | 56496245 |
| chr20 | 56752376 | 56755642 |
| chr20 | 55567756 | 55576905 |
| chr20 | 56620860 | 56631114 |
| chr20 | 55263851 | 55266028 |
| chr20 | 55297697 | 55297798 |
| chr20 | 55336301 | 55336773 |
| chr20 | 55336500 | 55336603 |
| chr20 | 55353789 | 55353922 |
| chr20 | 55379382 | 55381475 |
| chr20 | 55384672 | 55385227 |
| chr20 | 55393725 | 55394101 |
| chr20 | 55395185 | 55395564 |
| chr20 | 55402814 | 55405235 |
| chr20 | 55407887 | 55409244 |
| chr20 | 55411152 | 55411385 |
| chr20 | 55416440 | 55416982 |
| chr20 | 55418158 | 55418670 |
| chr20 | 55425855 | 55425957 |
| chr20 | 55434308 | 55434860 |
| chr20 | 55435736 | 55437603 |
| chr20 | 55439874 | 55439941 |
| chr20 | 55449257 | 55450734 |
| chr20 | 55474424 | 55474874 |
| chr20 | 55491513 | 55491714 |
| chr20 | 55496389 | 55499239 |
| chr20 | 55500911 | 55503291 |
| chr20 | 55507616 | 55508989 |
| chr20 | 55500911 | 55501860 |
| chr20 | 55502728 | 55502837 |
| chr20 | 55521233 | 55522423 |
| chr20 | 55534476 | 55534749 |
| chr20 | 55540959 | 55541465 |
| chr20 | 55545870 | 55547178 |
| chr20 | 55547876 | 55550904 |
| chr20 | 55551222 | 55552049 |
| chr20 | 55544183 | 55545633 |

|       |          |          |
|-------|----------|----------|
| chr20 | 55554757 | 55567235 |
| chr20 | 55549449 | 55550488 |
| chr20 | 55551222 | 55551279 |
| chr20 | 55556061 | 55556273 |
| chr20 | 55556164 | 55556279 |
| chr20 | 55575920 | 55576446 |
| chr20 | 55579463 | 55580208 |
| chr20 | 55588763 | 55589384 |
| chr20 | 55596511 | 55597570 |
| chr20 | 55599220 | 55599758 |
| chr20 | 55602388 | 55602588 |
| chr20 | 55604039 | 55604678 |
| chr20 | 55606922 | 55608173 |
| chr20 | 55609180 | 55610201 |
| chr20 | 55611196 | 55611810 |
| chr20 | 55613817 | 55615020 |
| chr20 | 55617902 | 55619691 |
| chr20 | 55623040 | 55623905 |
| chr20 | 55626194 | 55627265 |
| chr20 | 55628841 | 55631185 |
| chr20 | 55636001 | 55636224 |
| chr20 | 55639900 | 55640970 |
| chr20 | 55642897 | 55643981 |
| chr20 | 55645627 | 55646424 |
| chr20 | 55646647 | 55646847 |
| chr20 | 55658567 | 55660153 |
| chr20 | 55661440 | 55669407 |
| chr20 | 55670950 | 55672428 |
| chr20 | 55673281 | 55674174 |
| chr20 | 55653977 | 55657886 |
| chr20 | 55674816 | 55685583 |
| chr20 | 55697012 | 55711982 |
| chr20 | 55715308 | 55727266 |
| chr20 | 55733464 | 55734124 |
| chr20 | 55739986 | 55740536 |
| chr20 | 55745683 | 55747136 |
| chr20 | 55749736 | 55749837 |
| chr20 | 55753684 | 55754420 |
| chr20 | 55760581 | 55760807 |
| chr20 | 55766254 | 55766356 |
| chr20 | 55770322 | 55771838 |
| chr20 | 55778072 | 55780493 |
| chr20 | 55780673 | 55782694 |

|       |          |          |
|-------|----------|----------|
| chr20 | 55786638 | 55790136 |
| chr20 | 55794309 | 55796653 |
| chr20 | 55797576 | 55800628 |
| chr20 | 55807266 | 55807412 |
| chr20 | 55818774 | 55819632 |
| chr20 | 55823245 | 55823788 |
| chr20 | 55832310 | 55844810 |
| chr20 | 55845922 | 55846436 |
| chr20 | 55847212 | 55848217 |
| chr20 | 55850823 | 55851107 |
| chr20 | 55851942 | 55852046 |
| chr20 | 55857537 | 55858757 |
| chr20 | 55862418 | 55864420 |
| chr20 | 55865704 | 55867162 |
| chr20 | 55867628 | 55868059 |
| chr20 | 55878892 | 55884936 |
| chr20 | 55891931 | 55898913 |
| chr20 | 55885370 | 55891133 |
| chr20 | 55884213 | 55884417 |
| chr20 | 55901339 | 55902738 |
| chr20 | 55911856 | 55911964 |
| chr20 | 55970835 | 55973228 |
| chr20 | 55973823 | 55977473 |
| chr20 | 55963846 | 55969683 |
| chr20 | 55984547 | 55985840 |
| chr20 | 55988419 | 55990633 |
| chr20 | 55991276 | 55993855 |
| chr20 | 55982197 | 55984317 |
| chr20 | 56003239 | 56005087 |
| chr20 | 56006553 | 56016558 |
| chr20 | 56017659 | 56021745 |
| chr20 | 56022278 | 56025734 |
| chr20 | 56025997 | 56027327 |
| chr20 | 56028653 | 56029475 |
| chr20 | 56000001 | 56002499 |
| chr20 | 56030027 | 56044185 |
| chr20 | 56044854 | 56050531 |
| chr20 | 56004665 | 56004888 |
| chr20 | 56004972 | 56005083 |
| chr20 | 56012664 | 56012806 |
| chr20 | 56021057 | 56021161 |
| chr20 | 56042885 | 56042996 |
| chr20 | 56068472 | 56068736 |



|       |          |          |
|-------|----------|----------|
| chr20 | 56095823 | 56096353 |
| chr20 | 56103335 | 56105264 |
| chr20 | 56120891 | 56129968 |
| chr20 | 56131598 | 56146405 |
| chr20 | 56175462 | 56178706 |
| chr20 | 56105708 | 56119838 |
| chr20 | 56146824 | 56153186 |
| chr20 | 56154656 | 56175100 |
| chr20 | 56108714 | 56108921 |
| chr20 | 56113243 | 56113593 |
| chr20 | 56140483 | 56140624 |
| chr20 | 56189462 | 56190491 |
| chr20 | 56192199 | 56195027 |
| chr20 | 56196656 | 56202885 |
| chr20 | 56197792 | 56197965 |
| chr20 | 56200147 | 56200254 |
| chr20 | 56228792 | 56230017 |
| chr20 | 56231509 | 56231768 |
| chr20 | 56249341 | 56251569 |
| chr20 | 56253471 | 56254854 |
| chr20 | 56255393 | 56257139 |
| chr20 | 56264417 | 56266758 |
| chr20 | 56267221 | 56275240 |
| chr20 | 56260465 | 56263886 |
| chr20 | 56277428 | 56282201 |
| chr20 | 56287495 | 56289247 |
| chr20 | 56302431 | 56309994 |
| chr20 | 56316782 | 56320097 |
| chr20 | 56285284 | 56287010 |
| chr20 | 56289455 | 56296389 |
| chr20 | 56310269 | 56316498 |
| chr20 | 56321688 | 56327250 |
| chr20 | 56327393 | 56327436 |
| chr20 | 56329985 | 56333983 |
| chr20 | 56335076 | 56340151 |
| chr20 | 56328160 | 56329680 |
| chr20 | 56344714 | 56344948 |
| chr20 | 56354684 | 56355205 |
| chr20 | 56357456 | 56359942 |
| chr20 | 56366664 | 56368698 |
| chr20 | 56369950 | 56370058 |
| chr20 | 56371239 | 56371339 |
| chr20 | 56374062 | 56375134 |

|       |          |          |
|-------|----------|----------|
| chr20 | 56380776 | 56382535 |
| chr20 | 56382976 | 56383959 |
| chr20 | 56384666 | 56386441 |
| chr20 | 56388662 | 56390303 |
| chr20 | 56394542 | 56395298 |
| chr20 | 56401338 | 56401382 |
| chr20 | 56405972 | 56406166 |
| chr20 | 56410176 | 56410303 |
| chr20 | 56411221 | 56411771 |
| chr20 | 56415682 | 56415736 |
| chr20 | 56418438 | 56418491 |
| chr20 | 56419308 | 56422517 |
| chr20 | 56423704 | 56424165 |
| chr20 | 56444481 | 56445750 |
| chr20 | 56446224 | 56448659 |
| chr20 | 56451020 | 56458227 |
| chr20 | 56440382 | 56443905 |
| chr20 | 56445338 | 56445454 |
| chr20 | 56447820 | 56448039 |
| chr20 | 56467511 | 56470794 |
| chr20 | 56473063 | 56473939 |
| chr20 | 56476698 | 56477359 |
| chr20 | 56477689 | 56477972 |
| chr20 | 56485495 | 56486280 |
| chr20 | 56497559 | 56497648 |
| chr20 | 56498541 | 56498641 |
| chr20 | 56501509 | 56502695 |
| chr20 | 56506637 | 56507840 |
| chr20 | 56516980 | 56517240 |
| chr20 | 56528651 | 56534738 |
| chr20 | 56537338 | 56539963 |
| chr20 | 56541980 | 56546819 |
| chr20 | 56547456 | 56548480 |
| chr20 | 56548754 | 56551896 |
| chr20 | 56552134 | 56553092 |
| chr20 | 56540206 | 56541641 |
| chr20 | 56556039 | 56556281 |
| chr20 | 56556673 | 56557049 |
| chr20 | 56566652 | 56567658 |
| chr20 | 56570491 | 56571502 |
| chr20 | 56571209 | 56571521 |
| chr20 | 56572508 | 56573527 |
| chr20 | 56585238 | 56586364 |

|       |          |          |
|-------|----------|----------|
| chr20 | 56592314 | 56594651 |
| chr20 | 56601969 | 56602470 |
| chr20 | 56613320 | 56615881 |
| chr20 | 56615955 | 56616082 |
| chr20 | 56620860 | 56621924 |
| chr20 | 56622907 | 56623122 |
| chr20 | 56623249 | 56623365 |
| chr20 | 56624678 | 56624889 |
| chr20 | 56629004 | 56631114 |
| chr20 | 56631995 | 56632124 |
| chr20 | 56632005 | 56632513 |
| chr20 | 56643289 | 56645534 |
| chr20 | 56647388 | 56653162 |
| chr20 | 56656308 | 56656401 |
| chr20 | 56638612 | 56639914 |
| chr20 | 56653794 | 56656068 |
| chr20 | 56659246 | 56661719 |
| chr20 | 56661931 | 56668349 |
| chr20 | 56669784 | 56670878 |
| chr20 | 56674598 | 56676248 |
| chr20 | 56682071 | 56683074 |
| chr20 | 56682680 | 56683248 |
| chr20 | 56687663 | 56688812 |
| chr20 | 56699318 | 56702190 |
| chr20 | 56702749 | 56714915 |
| chr20 | 56715144 | 56726271 |
| chr20 | 56734598 | 56737478 |
| chr20 | 56739417 | 56743696 |
| chr20 | 56744570 | 56747064 |
| chr20 | 56753421 | 56755487 |
| chr20 | 56763037 | 56772366 |
| chr20 | 56767285 | 56767458 |
| chr20 | 56771314 | 56771517 |
| chr20 | 56778422 | 56779803 |
| chr20 | 56784122 | 56785842 |
| chr20 | 56787585 | 56789091 |
| chr20 | 56790696 | 56797728 |
| chr20 | 56804633 | 56808045 |
| chr20 | 56808939 | 56809095 |
| chr20 | 56799932 | 56803767 |
| chr20 | 56888296 | 56888929 |
| chr20 | 56920554 | 56920755 |
| chr20 | 56976295 | 56977474 |

|       |          |          |
|-------|----------|----------|
| chr20 | 57014842 | 57015470 |
| chr20 | 57017731 | 57017837 |
| chr20 | 57033241 | 57033923 |
| chr20 | 57056216 | 57056809 |
| chr20 | 57067868 | 57068404 |
| chr20 | 57073905 | 57089488 |
| chr20 | 57093721 | 57095824 |
| chr20 | 57123721 | 57135717 |
| chr20 | 57149395 | 57149596 |
| chr20 | 57149495 | 57149602 |
| chr20 | 57151791 | 57152297 |
| chr20 | 57156844 | 57161853 |
| chr20 | 57179679 | 57181923 |
| chr20 | 57194933 | 57196758 |
| chr20 | 57197703 | 57197877 |
| chr20 | 57198196 | 57198305 |
| chr20 | 57198450 | 57198724 |
| chr20 | 57199183 | 57199388 |
| chr20 | 57211978 | 57212276 |
| chr20 | 57213578 | 57213853 |
| chr20 | 57214526 | 57215229 |
| chr20 | 57221082 | 57221388 |
| chr20 | 57221829 | 57223272 |
| chr20 | 57225897 | 57226467 |
| chr20 | 57263891 | 57269494 |
| chr20 | 57269844 | 57272009 |
| chr20 | 57272595 | 57274192 |
| chr20 | 57274839 | 57275438 |
| chr20 | 57267126 | 57267326 |
| chr20 | 57268498 | 57269125 |
| chr20 | 57269844 | 57270623 |
| chr20 | 57291997 | 57293245 |
| chr20 | 57295702 | 57297363 |
| chr20 | 57297594 | 57299594 |
| chr20 | 57294445 | 57295256 |
| chr20 | 57319574 | 57325545 |
| chr20 | 57313055 | 57316514 |
| chr20 | 57325986 | 57331720 |
| chr20 | 57333165 | 57339505 |
| chr20 | 57339761 | 57343103 |
| chr20 | 57347484 | 57348865 |
| chr20 | 57351916 | 57359910 |
| chr20 | 57362836 | 57363652 |

|       |          |          |
|-------|----------|----------|
| chr20 | 57343580 | 57347223 |
| chr20 | 57391892 | 57392600 |
| chr20 | 57393998 | 57394131 |
| chr20 | 57395855 | 57397281 |
| chr20 | 57399516 | 57400544 |
| chr20 | 57405106 | 57405207 |
| chr20 | 57407655 | 57408989 |
| chr20 | 57415193 | 57419142 |
| chr20 | 57419168 | 57419867 |
| chr20 | 57427276 | 57432223 |
| chr20 | 57425212 | 57426931 |
| chr20 | 57444809 | 57451170 |
| chr20 | 57452355 | 57453509 |
| chr20 | 57457096 | 57464198 |
| chr20 | 57506145 | 57506481 |
| chr20 | 57551458 | 57551749 |
| chr20 | 57575377 | 57576857 |
| chr20 | 57577541 | 57579632 |
| chr20 | 57582019 | 57586911 |
| chr20 | 57587137 | 57588159 |
| chr20 | 57595081 | 57595363 |
| chr20 | 57622846 | 57623540 |
| chr20 | 57626673 | 57627247 |
| chr20 | 57643095 | 57645199 |
| chr20 | 57645697 | 57646696 |
| chr20 | 57646979 | 57647798 |
| chr20 | 57648953 | 57650665 |
| chr20 | 57651168 | 57651966 |
| chr20 | 57678028 | 57678290 |
| chr20 | 57683711 | 57683727 |
| chr20 | 57691469 | 57692704 |
| chr20 | 57696978 | 57697183 |
| chr20 | 57697452 | 57699992 |
| chr20 | 57708453 | 57709511 |
| chr20 | 57723683 | 57727882 |
| chr20 | 57728305 | 57731456 |
| chr20 | 57716758 | 57721686 |
| chr20 | 57748837 | 57749124 |
| chr20 | 57758320 | 57759962 |
| chr20 | 57760514 | 57761921 |
| chr20 | 57794798 | 57798520 |
| chr20 | 57798775 | 57799938 |
| chr20 | 57800870 | 57801608 |

|       |          |          |
|-------|----------|----------|
| chr20 | 57822837 | 57828453 |
| chr20 | 57831074 | 57832242 |
| chr20 | 57838801 | 57839322 |
| chr20 | 57859615 | 57859877 |
| chr20 | 57888370 | 57888827 |
| chr20 | 57918728 | 57920189 |
| chr20 | 57942868 | 57943855 |
| chr20 | 57954824 | 57955865 |
| chr20 | 57977673 | 57979218 |
| chr20 | 57980285 | 57982209 |
| chr20 | 58019123 | 58020303 |
| chr20 | 58037984 | 58038894 |
| chr20 | 58055896 | 58056408 |
| chr20 | 58100414 | 58100741 |
| chr20 | 58135116 | 58135987 |
| chr20 | 58136350 | 58137706 |
| chr20 | 58167141 | 58169549 |
| chr20 | 58183268 | 58186682 |
| chr20 | 58188555 | 58190438 |
| chr20 | 58190887 | 58192106 |
| chr20 | 58200936 | 58202481 |
| chr20 | 58205882 | 58207226 |
| chr20 | 58208395 | 58209902 |
| chr20 | 58210218 | 58211408 |
| chr20 | 58214724 | 58218005 |
| chr20 | 58220371 | 58221931 |
| chr20 | 58223030 | 58228098 |
| chr20 | 58235530 | 58236875 |
| chr20 | 58237298 | 58238411 |
| chr20 | 58239815 | 58241484 |
| chr20 | 58247371 | 58248967 |
| chr20 | 58250255 | 58251688 |
| chr20 | 58252305 | 58253213 |
| chr20 | 58263024 | 58265191 |
| chr20 | 58265574 | 58267486 |
| chr20 | 58268473 | 58270748 |
| chr20 | 58271260 | 58272824 |
| chr20 | 58273463 | 58276000 |
| chr20 | 58280529 | 58285641 |
| chr20 | 58285869 | 58289321 |
| chr20 | 58297286 | 58298101 |
| chr20 | 58298966 | 58303290 |
| chr20 | 58305154 | 58306519 |

|       |          |          |
|-------|----------|----------|
| chr20 | 58306747 | 58308297 |
| chr20 | 58313722 | 58315274 |
| chr20 | 58317801 | 58319840 |
| chr20 | 58320419 | 58321403 |
| chr20 | 58345822 | 58349265 |
| chr20 | 58357770 | 58358831 |
| chr20 | 58361130 | 58363451 |
| chr20 | 58366665 | 58367958 |
| chr20 | 58381797 | 58383146 |
| chr20 | 58384093 | 58385132 |
| chr20 | 58387656 | 58389457 |
| chr20 | 58392745 | 58397083 |
| chr20 | 58398452 | 58399744 |
| chr20 | 58401046 | 58402511 |
| chr20 | 58411850 | 58412981 |
| chr20 | 58413739 | 58416201 |
| chr20 | 58416851 | 58418131 |
| chr20 | 58420438 | 58422792 |
| chr20 | 58423335 | 58423986 |
| chr20 | 58228725 | 58234524 |
| chr20 | 58277250 | 58278852 |
| chr20 | 58309566 | 58311566 |
| chr20 | 58332799 | 58344440 |
| chr20 | 58369323 | 58380144 |
| chr20 | 58405493 | 58409098 |
| chr20 | 58193667 | 58196370 |
| chr20 | 58325113 | 58328513 |
| chr20 | 58136903 | 58137103 |
| chr20 | 58277964 | 58278085 |
| chr20 | 58340741 | 58340973 |
| chr20 | 58342795 | 58343008 |
| chr20 | 58515837 | 58516112 |
| chr20 | 58545121 | 58545225 |
| chr20 | 58566034 | 58575747 |
| chr20 | 58580396 | 58580835 |
| chr20 | 58581489 | 58584947 |
| chr20 | 58587077 | 58588380 |
| chr20 | 58626162 | 58642629 |
| chr20 | 58675011 | 58680037 |
| chr20 | 58648565 | 58663476 |
| chr20 | 58665184 | 58674371 |
| chr20 | 58681575 | 58682158 |
| chr20 | 58662105 | 58662331 |

|       |          |          |
|-------|----------|----------|
| chr20 | 58663010 | 58663230 |
| chr20 | 58670745 | 58670862 |
| chr20 | 58699973 | 58702235 |
| chr20 | 58683438 | 58698599 |
| chr20 | 58702752 | 58703593 |
| chr20 | 58706233 | 58706756 |
| chr20 | 58708217 | 58709268 |
| chr20 | 58710842 | 58710935 |
| chr20 | 58712451 | 58713104 |
| chr20 | 58716160 | 58716526 |
| chr20 | 58724085 | 58725092 |
| chr20 | 58724768 | 58724982 |
| chr20 | 58758929 | 58759133 |
| chr20 | 58764692 | 58765319 |
| chr20 | 58766227 | 58767303 |
| chr20 | 58777065 | 58777658 |
| chr20 | 58781085 | 58783354 |
| chr20 | 58792243 | 58793109 |
| chr20 | 58783715 | 58788801 |
| chr20 | 58807642 | 58808873 |
| chr20 | 58814190 | 58815146 |
| chr20 | 58818030 | 58818544 |
| chr20 | 58824280 | 58824820 |
| chr20 | 58831210 | 58832183 |
| chr20 | 58832703 | 58833207 |
| chr20 | 58832729 | 58833236 |
| chr20 | 58837272 | 58853208 |
| chr20 | 58870613 | 58870851 |
| chr20 | 58870622 | 58871124 |
| chr20 | 58875614 | 58875722 |
| chr20 | 58888436 | 58889360 |
| chr20 | 58892274 | 58892385 |
| chr20 | 58904024 | 58904975 |
| chr20 | 58921674 | 58923408 |
| chr20 | 58936862 | 58938962 |
| chr20 | 58939360 | 58940799 |
| chr20 | 58941134 | 58942206 |
| chr20 | 58933211 | 58933529 |
| chr20 | 58964764 | 58965677 |
| chr20 | 58969227 | 58970944 |
| chr20 | 58971712 | 58973093 |
| chr20 | 58982755 | 58983235 |
| chr20 | 58983391 | 58983959 |



|       |          |          |
|-------|----------|----------|
| chr20 | 58985853 | 58987680 |
| chr20 | 59000291 | 59000416 |
| chr20 | 59032901 | 59033005 |
| chr20 | 59043469 | 59045523 |
| chr20 | 59048085 | 59049328 |
| chr20 | 59050631 | 59051565 |
| chr20 | 59057348 | 59059112 |
| chr20 | 59059557 | 59062361 |
| chr20 | 59067607 | 59068649 |
| chr20 | 59086203 | 59086270 |
| chr20 | 59102604 | 59103811 |
| chr20 | 59125083 | 59126217 |
| chr20 | 59125860 | 59126451 |
| chr20 | 59133040 | 59134548 |
| chr20 | 59137484 | 59138506 |
| chr20 | 59140018 | 59142534 |
| chr20 | 59146511 | 59146520 |
| chr20 | 59128251 | 59130234 |
| chr20 | 59172999 | 59175337 |
| chr20 | 59194785 | 59194870 |
| chr20 | 59202835 | 59203652 |
| chr20 | 59216921 | 59217993 |
| chr20 | 59211178 | 59212106 |
| chr20 | 59217016 | 59217153 |
| chr20 | 59217195 | 59217403 |
| chr20 | 59307173 | 59308421 |
| chr20 | 59322426 | 59324356 |
| chr20 | 59335952 | 59337258 |
| chr20 | 59339745 | 59341323 |
| chr20 | 59380849 | 59383014 |
| chr20 | 59385969 | 59387486 |
| chr20 | 59323068 | 59323306 |
| chr20 | 59339745 | 59339746 |
| chr20 | 59341194 | 59341323 |
| chr20 | 59381047 | 59381154 |
| chr20 | 59381159 | 59381260 |
| chr20 | 59390503 | 59391269 |
| chr20 | 59392614 | 59395571 |
| chr20 | 59399399 | 59400201 |
| chr20 | 59400792 | 59400916 |
| chr20 | 59443790 | 59444963 |
| chr20 | 59474238 | 59475351 |
| chr20 | 59475778 | 59476880 |

|       |          |          |
|-------|----------|----------|
| chr20 | 59526534 | 59528397 |
| chr20 | 59534178 | 59534985 |
| chr20 | 59526930 | 59527177 |
| chr20 | 59528213 | 59528397 |
| chr20 | 59562149 | 59563196 |
| chr20 | 59568172 | 59569687 |
| chr20 | 59578114 | 59579075 |
| chr20 | 59616708 | 59618881 |
| chr20 | 59636290 | 59637407 |
| chr20 | 59656201 | 59657330 |
| chr20 | 59678365 | 59679857 |
| chr20 | 59683978 | 59685648 |
| chr20 | 59653263 | 59654943 |
| chr20 | 59721077 | 59721672 |
| chr20 | 59722578 | 59723764 |
| chr20 | 59722745 | 59722864 |
| chr20 | 59725832 | 59726346 |
| chr20 | 59737400 | 59738293 |
| chr20 | 59739404 | 59739967 |
| chr20 | 59742619 | 59744290 |
| chr20 | 59742759 | 59742859 |
| chr20 | 59743374 | 59743485 |
| chr20 | 59744037 | 59744146 |
| chr20 | 59760985 | 59761494 |
| chr20 | 59778030 | 59778134 |
| chr20 | 59796278 | 59797871 |
| chr20 | 59807812 | 59810321 |
| chr20 | 59808799 | 59808899 |
| chr20 | 59809075 | 59809175 |
| chr20 | 59815257 | 59818022 |
| chr20 | 59819301 | 59820209 |
| chr20 | 59879923 | 59880121 |
| chr20 | 59966549 | 59966783 |
| chr20 | 59982095 | 59983596 |
| chr20 | 60011215 | 60012764 |
| chr20 | 60015837 | 60018438 |
| chr20 | 60032325 | 60032541 |
| chr20 | 60077084 | 60077202 |
| chr20 | 60182916 | 60184281 |
| chr20 | 60662098 | 60663587 |
| chr20 | 60694137 | 60695483 |
| chr20 | 60696676 | 60697044 |
| chr20 | 60706780 | 60708078 |

|       |          |          |
|-------|----------|----------|
| chr20 | 60716082 | 60717384 |
| chr20 | 60719361 | 60720613 |
| chr20 | 60734112 | 60735121 |
| chr20 | 60717760 | 60719123 |
| chr20 | 60792969 | 60793846 |
| chr20 | 60794439 | 60796370 |
| chr20 | 60805649 | 60810123 |
| chr20 | 60813787 | 60814918 |
| chr20 | 60821257 | 60822193 |
| chr20 | 60782028 | 60786715 |
| chr20 | 60795764 | 60796370 |
| chr20 | 60808796 | 60808921 |
| chr20 | 60879333 | 60880909 |
| chr20 | 60881787 | 60883356 |
| chr20 | 60936475 | 60937972 |
| chr20 | 60939676 | 60947067 |
| chr20 | 60952763 | 60953307 |
| chr20 | 60952763 | 60954059 |
| chr20 | 60982144 | 60983361 |
| chr20 | 60984458 | 60987636 |
| chr20 | 60979354 | 60981343 |
| chr20 | 60997779 | 60999141 |
| chr20 | 61001192 | 61003499 |
| chr20 | 61011295 | 61012218 |
| chr20 | 61027210 | 61028117 |
| chr20 | 61053486 | 61053715 |
| chr20 | 61054361 | 61054595 |
| chr20 | 61054648 | 61054756 |
| chr20 | 61056418 | 61059614 |
| chr20 | 61066373 | 61066578 |
| chr20 | 61069205 | 61069824 |
| chr20 | 61141767 | 61142927 |
| chr20 | 61173209 | 61173996 |
| chr20 | 61192383 | 61193228 |
| chr20 | 61195185 | 61196347 |
| chr20 | 61207204 | 61208608 |
| chr20 | 61269480 | 61270523 |
| chr20 | 61282357 | 61285252 |
| chr20 | 61272422 | 61276224 |
| chr20 | 61333775 | 61336347 |
| chr20 | 61336946 | 61339457 |
| chr20 | 61345782 | 61347052 |
| chr20 | 61351676 | 61352706 |

|       |          |          |
|-------|----------|----------|
| chr20 | 61365271 | 61366718 |
| chr20 | 61370805 | 61371620 |
| chr20 | 61307383 | 61308961 |
| chr20 | 61365271 | 61365720 |
| chr20 | 61400547 | 61402174 |
| chr20 | 61400547 | 61400576 |
| chr20 | 61400613 | 61400761 |
| chr20 | 61423485 | 61423632 |
| chr20 | 61423841 | 61424391 |
| chr20 | 61531320 | 61532549 |
| chr20 | 61555725 | 61556373 |
| chr20 | 61579763 | 61581084 |
| chr20 | 61639999 | 61641208 |
| chr20 | 61643513 | 61643848 |
| chr20 | 61644638 | 61644996 |
| chr20 | 61682297 | 61683442 |
| chr20 | 61687568 | 61689241 |
| chr20 | 61696126 | 61697277 |
| chr20 | 61707837 | 61709204 |
| chr20 | 61713029 | 61714462 |
| chr20 | 61713070 | 61713184 |
| chr20 | 61714194 | 61714296 |
| chr20 | 61733156 | 61733325 |
| chr20 | 61733473 | 61733658 |
| chr20 | 61743334 | 61746484 |
| chr20 | 61809679 | 61811456 |
| chr20 | 61817600 | 61818604 |
| chr20 | 61846207 | 61848219 |
| chr20 | 61855080 | 61857000 |
| chr20 | 61865994 | 61866989 |
| chr20 | 61866218 | 61866336 |
| chr20 | 61880133 | 61882027 |
| chr20 | 61899998 | 61901345 |
| chr20 | 61904644 | 61905934 |
| chr20 | 61940674 | 61941189 |
| chr20 | 61962667 | 61963179 |
| chr20 | 61986190 | 61987189 |
| chr20 | 62008823 | 62011332 |
| chr20 | 62016662 | 62020309 |
| chr20 | 62032462 | 62033348 |
| chr20 | 62044369 | 62044386 |
| chr20 | 62074921 | 62075782 |
| chr20 | 62083383 | 62084540 |

|       |          |          |
|-------|----------|----------|
| chr20 | 62085899 | 62086966 |
| chr20 | 62087613 | 62088755 |
| chr20 | 62106094 | 62107385 |
| chr20 | 62112297 | 62115118 |
| chr20 | 62116854 | 62118441 |
| chr20 | 62124211 | 62125009 |
| chr20 | 62128195 | 62131250 |
| chr20 | 62134972 | 62136579 |
| chr20 | 62164535 | 62165423 |
| chr20 | 62167483 | 62168492 |
| chr20 | 62167579 | 62168718 |
| chr20 | 62175009 | 62175691 |
| chr20 | 62176444 | 62177095 |
| chr20 | 62179362 | 62179682 |
| chr20 | 62211758 | 62212190 |
| chr20 | 62282909 | 62283695 |
| chr20 | 62313337 | 62314699 |
| chr20 | 62336145 | 62337190 |
| chr20 | 62337978 | 62341005 |
| chr20 | 62359468 | 62360697 |
| chr20 | 62362667 | 62363549 |
| chr20 | 62365937 | 62367417 |
| chr20 | 62463161 | 62463383 |
| chr20 | 62478148 | 62478273 |
| chr20 | 62494728 | 62495813 |
| chr20 | 62488222 | 62491135 |
| chr20 | 62494728 | 62495317 |
| chr20 | 62611499 | 62611623 |
| chr20 | 62611631 | 62611792 |
| chr20 | 62641606 | 62642860 |
| chr20 | 62675123 | 62677035 |
| chr20 | 62693871 | 62694732 |
| chr20 | 62696762 | 62698467 |
| chr20 | 62710089 | 62711516 |
| chr20 | 62776000 | 62777617 |
| chr20 | 62792433 | 62793722 |
| chr20 | 62812836 | 62813654 |
| chr20 | 62815303 | 62816171 |
| chr20 | 62830374 | 62831501 |
| chr20 | 62842596 | 62843346 |
| chr20 | 62853304 | 62854623 |
| chr20 | 62887020 | 62887999 |
| chr20 | 62894121 | 62895325 |

|       |          |          |
|-------|----------|----------|
| chr20 | 62676013 | 62676280 |
| chr21 | 9825660  | 9827759  |
| chr21 | 9832266  | 9833152  |
| chr21 | 10084773 | 10085672 |
| chr21 | 10697801 | 10707708 |
| chr21 | 10730096 | 10730835 |
| chr21 | 10733486 | 10734640 |
| chr21 | 10735529 | 10736812 |
| chr21 | 10743084 | 10746612 |
| chr21 | 10748447 | 10754431 |
| chr21 | 10754970 | 10764221 |
| chr21 | 10764562 | 10766587 |
| chr21 | 10813491 | 10819569 |
| chr21 | 10819838 | 10825025 |
| chr21 | 10825616 | 10828622 |
| chr21 | 10830025 | 10831176 |
| chr21 | 10831619 | 10834398 |
| chr21 | 10834734 | 10838496 |
| chr21 | 10839278 | 10840483 |
| chr21 | 10841135 | 10844247 |
| chr21 | 10849043 | 10850034 |
| chr21 | 10850761 | 10853190 |
| chr21 | 10854136 | 10859388 |
| chr21 | 10859903 | 10861239 |
| chr21 | 10697868 | 10707865 |
| chr21 | 10708642 | 10728477 |
| chr21 | 10772627 | 10793074 |
| chr21 | 10793592 | 10812027 |
| chr21 | 10845953 | 10847471 |
| chr21 | 10936619 | 10937427 |
| chr21 | 10936839 | 10937252 |
| chr21 | 11041158 | 11041793 |
| chr21 | 11041771 | 11041890 |
| chr21 | 11042543 | 11042786 |
| chr21 | 11043073 | 11043151 |
| chr21 | 11044211 | 11044538 |
| chr21 | 11046522 | 11046527 |
| chr21 | 11047411 | 11047549 |
| chr21 | 11051286 | 11051852 |
| chr21 | 11052805 | 11052842 |
| chr21 | 11053474 | 11053652 |
| chr21 | 11053873 | 11057810 |
| chr21 | 11061680 | 11062776 |

|       |          |          |
|-------|----------|----------|
| chr21 | 11069444 | 11069558 |
| chr21 | 11070944 | 11072085 |
| chr21 | 11073565 | 11073753 |
| chr21 | 11077760 | 11080515 |
| chr21 | 11081520 | 11085619 |
| chr21 | 11085889 | 11087162 |
| chr21 | 11087395 | 11087983 |
| chr21 | 11075926 | 11077086 |
| chr21 | 11079731 | 11079929 |
| chr21 | 11080037 | 11080239 |
| chr21 | 11080335 | 11080515 |
| chr21 | 11082031 | 11082171 |
| chr21 | 11082057 | 11082271 |
| chr21 | 11082615 | 11082735 |
| chr21 | 11082962 | 11083370 |
| chr21 | 11084168 | 11085619 |
| chr21 | 11086279 | 11086539 |
| chr21 | 11087757 | 11087975 |
| chr21 | 11093382 | 11093681 |
| chr21 | 11094456 | 11094724 |
| chr21 | 11095051 | 11095509 |
| chr21 | 11096098 | 11096294 |
| chr21 | 11180258 | 11182197 |
| chr21 | 11185058 | 11186794 |
| chr21 | 11180258 | 11182197 |
| chr21 | 11185649 | 11185907 |
| chr21 | 11186118 | 11186382 |
| chr21 | 11186566 | 11186794 |
| chr21 | 14339077 | 14339281 |
| chr21 | 14339285 | 14339505 |
| chr21 | 14341482 | 14341699 |
| chr21 | 14343190 | 14343709 |
| chr21 | 14344136 | 14346160 |
| chr21 | 14358632 | 14358803 |
| chr21 | 14359086 | 14359322 |
| chr21 | 14359624 | 14359791 |
| chr21 | 14361398 | 14361506 |
| chr21 | 14361978 | 14362378 |
| chr21 | 14362538 | 14362758 |
| chr21 | 14364553 | 14364772 |
| chr21 | 14365210 | 14365441 |
| chr21 | 14365874 | 14365924 |
| chr21 | 14366645 | 14368761 |

|       |          |          |
|-------|----------|----------|
| chr21 | 16529764 | 16530050 |
| chr21 | 16673510 | 16673965 |
| chr21 | 34739248 | 34740450 |
| chr21 | 35119338 | 35120458 |
| chr21 | 35537841 | 35539904 |
| chr21 | 39426700 | 39427518 |
| chr21 | 39483539 | 39484658 |
| chr21 | 39487138 | 39487980 |
| chr21 | 39498596 | 39499586 |
| chr21 | 39500490 | 39501360 |
| chr21 | 39505800 | 39506712 |
| chr21 | 39528066 | 39529227 |
| chr21 | 39530047 | 39530900 |
| chr21 | 39531130 | 39531993 |
| chr21 | 39538283 | 39539170 |
| chr21 | 39541123 | 39544374 |
| chr21 | 39606049 | 39607523 |
| chr21 | 39620141 | 39621787 |
| chr21 | 39643907 | 39644699 |
| chr21 | 39650809 | 39651784 |
| chr21 | 39704950 | 39706614 |
| chr21 | 39709509 | 39710602 |
| chr21 | 39715018 | 39716384 |
| chr21 | 39724045 | 39725208 |
| chr21 | 39783810 | 39785084 |
| chr21 | 39831466 | 39832876 |
| chr21 | 39860253 | 39861215 |
| chr21 | 39964280 | 39965787 |
| chr21 | 39967818 | 39969042 |
| chr21 | 40007318 | 40009068 |
| chr21 | 40012363 | 40013710 |
| chr21 | 40075712 | 40076615 |
| chr21 | 40085205 | 40086647 |
| chr21 | 40096618 | 40097710 |
| chr21 | 40156296 | 40156982 |
| chr21 | 40158975 | 40160900 |
| chr21 | 40191234 | 40192418 |
| chr21 | 40197915 | 40200206 |
| chr21 | 40234550 | 40235447 |
| chr21 | 40252552 | 40254057 |
| chr21 | 40255747 | 40261984 |
| chr21 | 40281630 | 40285522 |
| chr21 | 40323763 | 40325292 |



|       |          |          |
|-------|----------|----------|
| chr21 | 40334246 | 40335385 |
| chr21 | 40359665 | 40360671 |
| chr21 | 40378198 | 40378977 |
| chr21 | 40395207 | 40396082 |
| chr21 | 40397769 | 40398431 |
| chr21 | 40427264 | 40428186 |
| chr21 | 40446149 | 40447825 |
| chr21 | 40466191 | 40467682 |
| chr21 | 40472446 | 40473560 |
| chr21 | 40494820 | 40495729 |
| chr21 | 40534834 | 40537060 |
| chr21 | 39510548 | 39520884 |
| chr21 | 39590710 | 39603616 |
| chr21 | 39615817 | 39616924 |
| chr21 | 39746358 | 39747795 |
| chr21 | 40320354 | 40321783 |
| chr21 | 40337361 | 40338494 |
| chr21 | 40402181 | 40403187 |
| chr21 | 40434740 | 40436045 |
| chr21 | 39583493 | 39584354 |
| chr21 | 39528314 | 39528517 |
| chr21 | 39528942 | 39529173 |
| chr21 | 39968547 | 39969001 |
| chr21 | 40012741 | 40012903 |
| chr21 | 40013079 | 40013313 |
| chr21 | 40097020 | 40097150 |
| chr21 | 40360549 | 40360651 |
| chr21 | 40686383 | 40686454 |
| chr21 | 40719695 | 40721152 |
| chr21 | 40760449 | 40760568 |
| chr21 | 40760633 | 40760768 |
| chr21 | 40802612 | 40802665 |
| chr21 | 40895064 | 40896417 |
| chr21 | 40898760 | 40900646 |
| chr21 | 40938721 | 40940477 |
| chr21 | 40950841 | 40952536 |
| chr21 | 41015127 | 41016276 |
| chr21 | 41033560 | 41034422 |
| chr21 | 41036892 | 41038122 |
| chr21 | 41038575 | 41039882 |
| chr21 | 41041457 | 41042457 |
| chr21 | 41093715 | 41094517 |
| chr21 | 41165975 | 41166830 |

|       |          |          |
|-------|----------|----------|
| chr21 | 41177117 | 41178295 |
| chr21 | 41184691 | 41185721 |
| chr21 | 41212168 | 41212971 |
| chr21 | 41223687 | 41224931 |
| chr21 | 41226110 | 41228033 |
| chr21 | 41286437 | 41287630 |
| chr21 | 41331932 | 41332724 |
| chr21 | 41361293 | 41362707 |
| chr21 | 41370747 | 41372241 |
| chr21 | 41526267 | 41527105 |
| chr21 | 41619286 | 41622325 |
| chr21 | 41623184 | 41624238 |
| chr21 | 41671908 | 41672464 |
| chr21 | 41723651 | 41724505 |
| chr21 | 41748693 | 41749545 |
| chr21 | 41753020 | 41755281 |
| chr21 | 41756370 | 41759086 |
| chr21 | 41770917 | 41771694 |
| chr21 | 41759827 | 41763028 |
| chr21 | 41793117 | 41793464 |
| chr21 | 41813111 | 41814083 |
| chr21 | 41816821 | 41817571 |
| chr21 | 41833064 | 41833292 |
| chr21 | 41835086 | 41835947 |
| chr21 | 41998132 | 42000185 |
| chr21 | 42000780 | 42002189 |
| chr21 | 42004273 | 42005901 |
| chr21 | 42015811 | 42016322 |
| chr21 | 42024552 | 42024692 |
| chr21 | 42061424 | 42062833 |
| chr21 | 42063848 | 42064868 |
| chr21 | 42089383 | 42090311 |
| chr21 | 42212956 | 42213829 |
| chr21 | 42212956 | 42213223 |
| chr21 | 42290988 | 42291757 |
| chr21 | 42346892 | 42349131 |
| chr21 | 42372336 | 42373595 |
| chr21 | 42395749 | 42396601 |
| chr21 | 42417155 | 42418408 |
| chr21 | 42446709 | 42447446 |
| chr21 | 42451728 | 42451970 |
| chr21 | 42483638 | 42483777 |
| chr21 | 42484950 | 42486180 |

|       |          |          |
|-------|----------|----------|
| chr21 | 42513909 | 42515010 |
| chr21 | 42556664 | 42556797 |
| chr21 | 42608041 | 42609262 |
| chr21 | 42608178 | 42608406 |
| chr21 | 42625385 | 42626437 |
| chr21 | 42643422 | 42644812 |
| chr21 | 42673171 | 42674444 |
| chr21 | 42714542 | 42715307 |
| chr21 | 42737266 | 42738139 |
| chr21 | 42752084 | 42753232 |
| chr21 | 42767894 | 42769303 |
| chr21 | 42791714 | 42792690 |
| chr21 | 42804406 | 42805632 |
| chr21 | 42806178 | 42808841 |
| chr21 | 42878239 | 42880061 |
| chr21 | 42898611 | 42899506 |
| chr21 | 42905906 | 42906721 |
| chr21 | 42907665 | 42909198 |
| chr21 | 42948281 | 42949903 |
| chr21 | 42878239 | 42880061 |
| chr21 | 42908009 | 42908278 |
| chr21 | 42949386 | 42949487 |
| chr21 | 43008965 | 43009859 |
| chr21 | 43021149 | 43022694 |
| chr21 | 43025687 | 43027487 |
| chr21 | 43032569 | 43033549 |
| chr21 | 43050037 | 43051338 |
| chr21 | 43098013 | 43099485 |
| chr21 | 43100124 | 43102160 |
| chr21 | 43112400 | 43113345 |
| chr21 | 43119169 | 43120029 |
| chr21 | 43123841 | 43125176 |
| chr21 | 43135308 | 43136900 |
| chr21 | 43157520 | 43159369 |
| chr21 | 43178308 | 43179369 |
| chr21 | 43186479 | 43187472 |
| chr21 | 43203167 | 43204561 |
| chr21 | 43205621 | 43207370 |
| chr21 | 43106258 | 43107319 |
| chr21 | 43171166 | 43172190 |
| chr21 | 43027141 | 43027362 |
| chr21 | 43050468 | 43050571 |
| chr21 | 43299039 | 43300171 |

|       |          |          |
|-------|----------|----------|
| chr21 | 43314827 | 43315758 |
| chr21 | 43320519 | 43322104 |
| chr21 | 43373825 | 43375234 |
| chr21 | 43375571 | 43377047 |
| chr21 | 43377932 | 43378880 |
| chr21 | 43384943 | 43386116 |
| chr21 | 43399617 | 43400606 |
| chr21 | 43374488 | 43375234 |
| chr21 | 43399724 | 43400546 |
| chr21 | 43442042 | 43443117 |
| chr21 | 43459262 | 43460063 |
| chr21 | 43476259 | 43478156 |
| chr21 | 43513501 | 43514851 |
| chr21 | 43525837 | 43526630 |
| chr21 | 43527454 | 43528307 |
| chr21 | 43533225 | 43534533 |
| chr21 | 43534984 | 43535990 |
| chr21 | 43540043 | 43541101 |
| chr21 | 43565236 | 43566217 |
| chr21 | 43619734 | 43620860 |
| chr21 | 43648380 | 43649629 |
| chr21 | 43728768 | 43729955 |
| chr21 | 43735205 | 43735918 |
| chr21 | 43757996 | 43758983 |
| chr21 | 43758625 | 43758983 |
| chr21 | 43773902 | 43774889 |
| chr21 | 43779962 | 43781431 |
| chr21 | 43785838 | 43787132 |
| chr21 | 43796073 | 43797272 |
| chr21 | 43801436 | 43802517 |
| chr21 | 43806676 | 43807463 |
| chr21 | 43826187 | 43826353 |
| chr21 | 43845412 | 43846376 |
| chr21 | 43846443 | 43846621 |
| chr21 | 43849472 | 43850938 |
| chr21 | 43856767 | 43856804 |
| chr21 | 43857685 | 43857849 |
| chr21 | 43869661 | 43870853 |
| chr21 | 43869749 | 43869897 |
| chr21 | 43898731 | 43898973 |
| chr21 | 43912858 | 43912978 |
| chr21 | 43933604 | 43935115 |
| chr21 | 44024826 | 44025030 |

|       |          |          |
|-------|----------|----------|
| chr21 | 44027321 | 44027421 |
| chr21 | 44034431 | 44035475 |
| chr21 | 44238446 | 44238564 |
| chr21 | 44348551 | 44349216 |
| chr21 | 44461847 | 44463854 |
| chr21 | 44464577 | 44466357 |
| chr21 | 44527062 | 44527302 |
| chr21 | 44528204 | 44528566 |
| chr21 | 44571072 | 44572217 |
| chr21 | 44618259 | 44620386 |
| chr21 | 44620946 | 44622732 |
| chr21 | 44762370 | 44764022 |
| chr21 | 44764553 | 44765670 |
| chr21 | 44783584 | 44784439 |
| chr21 | 44820603 | 44821466 |
| chr21 | 44855629 | 44856615 |
| chr21 | 44897424 | 44898606 |
| chr21 | 44919725 | 44920696 |
| chr21 | 44936010 | 44937650 |
| chr21 | 44762370 | 44762468 |
| chr21 | 44963502 | 44964050 |
| chr21 | 45079067 | 45079928 |
| chr21 | 45131938 | 45133283 |
| chr21 | 45138584 | 45140006 |
| chr21 | 45230530 | 45231735 |
| chr21 | 45280397 | 45280904 |
| chr21 | 45349085 | 45350336 |
| chr21 | 45358473 | 45359653 |
| chr21 | 45431034 | 45432362 |
| chr21 | 45599135 | 45601014 |
| chr21 | 45601348 | 45602479 |
| chr21 | 45621764 | 45623166 |
| chr21 | 45627473 | 45628695 |
| chr21 | 45660976 | 45662028 |
| chr21 | 45798507 | 45799410 |
| chr21 | 45803406 | 45805921 |
| chr21 | 45863962 | 45865102 |
| chr21 | 45873401 | 45874795 |
| chr21 | 45911608 | 45913777 |
| chr21 | 45929494 | 45930786 |
| chr21 | 45967374 | 45968406 |
| chr21 | 46000827 | 46002046 |
| chr21 | 46042914 | 46045764 |

|       |          |          |
|-------|----------|----------|
| chr21 | 46050494 | 46052867 |
| chr21 | 46063276 | 46065583 |
| chr21 | 46089546 | 46092032 |
| chr21 | 46102354 | 46103043 |
| chr21 | 46112151 | 46113644 |
| chr21 | 46219692 | 46220841 |
| chr21 | 46238238 | 46240317 |
| chr21 | 46241269 | 46244069 |
| chr21 | 46246740 | 46249858 |
| chr21 | 46321063 | 46322481 |
| chr21 | 46347032 | 46348687 |
| chr21 | 46359219 | 46360564 |
| chr21 | 46423758 | 46424512 |
| chr21 | 46438345 | 46439190 |
| chr21 | 46455263 | 46457487 |
| chr21 | 46466724 | 46469067 |
| chr21 | 46492711 | 46493772 |
| chr21 | 46502625 | 46503416 |
| chr21 | 46606696 | 46608104 |
| chr21 | 46038358 | 46039195 |
| chr21 | 46663126 | 46664053 |
| chr21 | 46732650 | 46732785 |
| chr21 | 46761427 | 46761656 |
| chr21 | 46761554 | 46761659 |
| chr21 | 46806338 | 46807310 |
| chr21 | 46827565 | 46828617 |
| chr21 | 46890776 | 46891741 |
| chr21 | 46932811 | 46934064 |
| chr21 | 46974150 | 46975217 |
| chr21 | 46998151 | 46999800 |
| chr21 | 47005890 | 47007318 |
| chr21 | 47019792 | 47021455 |
| chr21 | 47022836 | 47023214 |
| chr21 | 47023311 | 47024237 |
| chr21 | 47128228 | 47129098 |
| chr21 | 47342830 | 47343569 |
| chr21 | 47428088 | 47429630 |
| chr21 | 47448819 | 47449151 |
| chr21 | 47481171 | 47482085 |
| chr21 | 47867738 | 47870205 |
| chr21 | 47867738 | 47867779 |
| chr21 | 47992454 | 47994172 |
| chr21 | 48001841 | 48002571 |

|       |          |          |
|-------|----------|----------|
| chr21 | 48014252 | 48016247 |
| chr21 | 48055058 | 48055860 |
| chr22 | 16850231 | 16851031 |
| chr22 | 19303653 | 19305103 |
| chr22 | 19419318 | 19420455 |
| chr22 | 19635622 | 19636684 |
| chr22 | 22813285 | 22814682 |
| chr22 | 23322647 | 23324750 |
| chr22 | 24591500 | 24592404 |
| chr22 | 24951422 | 24952157 |
| chr22 | 25111999 | 25113462 |
| chr22 | 30086248 | 30087413 |
| chr22 | 31367711 | 31369060 |
| chr22 | 31370230 | 31371586 |
| chr22 | 33101713 | 33103246 |
| chr22 | 34317281 | 34317860 |
| chr22 | 40067895 | 40068722 |
| chr22 | 42510790 | 42511927 |
| chr22 | 46191531 | 46192807 |
| chr22 | 46575964 | 46577893 |
| chr22 | 47151516 | 47152820 |
| chr22 | 50161074 | 50161211 |
| chr22 | 50161312 | 50161429 |
| chr22 | 51086911 | 51087577 |
| chr3  | 3220769  | 3221689  |
| chr3  | 4565787  | 4567154  |
| chr3  | 4729584  | 4730814  |
| chr3  | 4784452  | 4785656  |
| chr3  | 5018558  | 5020907  |
| chr3  | 5021331  | 5022768  |
| chr3  | 5028157  | 5029417  |
| chr3  | 5040909  | 5041938  |
| chr3  | 5295138  | 5295537  |
| chr3  | 5335861  | 5336688  |
| chr3  | 8360023  | 8360808  |
| chr3  | 8522173  | 8523031  |
| chr3  | 8525810  | 8526818  |
| chr3  | 8485454  | 8487542  |
| chr3  | 8670813  | 8671686  |
| chr3  | 8670932  | 8671038  |
| chr3  | 8766106  | 8767029  |
| chr3  | 8790183  | 8791060  |
| chr3  | 9191118  | 9192822  |

|      |          |          |
|------|----------|----------|
| chr3 | 9291194  | 9291964  |
| chr3 | 9532929  | 9534013  |
| chr3 | 9624561  | 9626171  |
| chr3 | 9655206  | 9655427  |
| chr3 | 9660135  | 9660180  |
| chr3 | 9807685  | 9808673  |
| chr3 | 9850820  | 9851396  |
| chr3 | 9852113  | 9852187  |
| chr3 | 9931707  | 9932948  |
| chr3 | 9957885  | 9958890  |
| chr3 | 9959783  | 9960685  |
| chr3 | 9974204  | 9975580  |
| chr3 | 9997395  | 9998686  |
| chr3 | 9993265  | 9994607  |
| chr3 | 10233282 | 10234836 |
| chr3 | 10286616 | 10287859 |
| chr3 | 10289724 | 10290636 |
| chr3 | 10362134 | 10363460 |
| chr3 | 10395703 | 10396790 |
| chr3 | 10464483 | 10465214 |
| chr3 | 10503839 | 10504821 |
| chr3 | 10589597 | 10590460 |
| chr3 | 10654672 | 10655811 |
| chr3 | 10677986 | 10679279 |
| chr3 | 10686760 | 10687556 |
| chr3 | 10748199 | 10749008 |
| chr3 | 10773763 | 10775763 |
| chr3 | 10853565 | 10854501 |
| chr3 | 10932247 | 10933864 |
| chr3 | 10947602 | 10951808 |
| chr3 | 10983328 | 10985384 |
| chr3 | 10985805 | 10986606 |
| chr3 | 11004995 | 11006449 |
| chr3 | 11011281 | 11012157 |
| chr3 | 11164507 | 11166208 |
| chr3 | 11285054 | 11286845 |
| chr3 | 10583871 | 10585176 |
| chr3 | 11285054 | 11285102 |
| chr3 | 11641965 | 11642740 |
| chr3 | 11642082 | 11642740 |
| chr3 | 11832008 | 11832807 |
| chr3 | 11894857 | 11896880 |
| chr3 | 11895169 | 11895499 |



|      |          |          |
|------|----------|----------|
| chr3 | 11943834 | 11944814 |
| chr3 | 12052640 | 12053576 |
| chr3 | 12153295 | 12154155 |
| chr3 | 12170756 | 12171582 |
| chr3 | 12179441 | 12180717 |
| chr3 | 12228028 | 12228824 |
| chr3 | 12262200 | 12262606 |
| chr3 | 12268747 | 12269607 |
| chr3 | 12390131 | 12390201 |
| chr3 | 12464858 | 12465061 |
| chr3 | 12597896 | 12599178 |
| chr3 | 12747401 | 12748460 |
| chr3 | 12799903 | 12800842 |
| chr3 | 12854488 | 12855434 |
| chr3 | 12876556 | 12877480 |
| chr3 | 12882238 | 12883882 |
| chr3 | 12896081 | 12896817 |
| chr3 | 12906469 | 12907690 |
| chr3 | 13030941 | 13032579 |
| chr3 | 13034916 | 13037150 |
| chr3 | 13061293 | 13062168 |
| chr3 | 13081894 | 13083086 |
| chr3 | 13103860 | 13105215 |
| chr3 | 13141841 | 13142695 |
| chr3 | 13152079 | 13153507 |
| chr3 | 13189533 | 13190341 |
| chr3 | 13196813 | 13197676 |
| chr3 | 13203085 | 13203949 |
| chr3 | 13219380 | 13221682 |
| chr3 | 13228540 | 13229340 |
| chr3 | 13229707 | 13230630 |
| chr3 | 13235800 | 13237973 |
| chr3 | 13309645 | 13311878 |
| chr3 | 13327428 | 13329199 |
| chr3 | 13454891 | 13455794 |
| chr3 | 13460425 | 13462263 |
| chr3 | 13508878 | 13509756 |
| chr3 | 13512016 | 13514144 |
| chr3 | 13520442 | 13521495 |
| chr3 | 13574603 | 13576246 |
| chr3 | 13580534 | 13581756 |
| chr3 | 13583187 | 13584478 |
| chr3 | 13751889 | 13753403 |

|      |          |          |
|------|----------|----------|
| chr3 | 13781857 | 13782803 |
| chr3 | 13803861 | 13804898 |
| chr3 | 13810754 | 13811668 |
| chr3 | 13825741 | 13826603 |
| chr3 | 13854074 | 13858927 |
| chr3 | 13891435 | 13892177 |
| chr3 | 14012820 | 14015552 |
| chr3 | 13270644 | 13271962 |
| chr3 | 13450346 | 13451301 |
| chr3 | 13516649 | 13517563 |
| chr3 | 13548776 | 13549925 |
| chr3 | 13778681 | 13780291 |
| chr3 | 13939651 | 13946633 |
| chr3 | 13460425 | 13462059 |
| chr3 | 14078701 | 14078962 |
| chr3 | 14080564 | 14082149 |
| chr3 | 14159773 | 14160788 |
| chr3 | 14165465 | 14168462 |
| chr3 | 14177641 | 14178523 |
| chr3 | 14194428 | 14195361 |
| chr3 | 14200373 | 14201166 |
| chr3 | 14201670 | 14202789 |
| chr3 | 14264596 | 14265789 |
| chr3 | 14274871 | 14275995 |
| chr3 | 14285151 | 14286133 |
| chr3 | 14306022 | 14307906 |
| chr3 | 14309131 | 14310702 |
| chr3 | 14319716 | 14321011 |
| chr3 | 14327019 | 14327968 |
| chr3 | 14342000 | 14343139 |
| chr3 | 14369726 | 14370536 |
| chr3 | 14392370 | 14393435 |
| chr3 | 14420382 | 14421514 |
| chr3 | 14453970 | 14455294 |
| chr3 | 14470414 | 14471306 |
| chr3 | 14473172 | 14474551 |
| chr3 | 14549273 | 14550134 |
| chr3 | 14630132 | 14630843 |
| chr3 | 14692685 | 14693937 |
| chr3 | 14270007 | 14270870 |
| chr3 | 14433628 | 14434483 |
| chr3 | 14630692 | 14630843 |
| chr3 | 14864311 | 14865168 |

|      |          |          |
|------|----------|----------|
| chr3 | 14916491 | 14917272 |
| chr3 | 14921185 | 14922032 |
| chr3 | 14946099 | 14947596 |
| chr3 | 15140010 | 15141388 |
| chr3 | 15237577 | 15238353 |
| chr3 | 15333959 | 15335179 |
| chr3 | 15351520 | 15353261 |
| chr3 | 15367558 | 15368384 |
| chr3 | 15374462 | 15374653 |
| chr3 | 15540635 | 15541812 |
| chr3 | 15665399 | 15666466 |
| chr3 | 15674868 | 15676947 |
| chr3 | 15686830 | 15687798 |
| chr3 | 15697269 | 15698512 |
| chr3 | 15677169 | 15679940 |
| chr3 | 16114795 | 16115510 |
| chr3 | 16122439 | 16125685 |
| chr3 | 16188376 | 16189388 |
| chr3 | 16214882 | 16215638 |
| chr3 | 16419672 | 16420472 |
| chr3 | 16545598 | 16546575 |
| chr3 | 16552934 | 16554058 |
| chr3 | 16557745 | 16558638 |
| chr3 | 16567662 | 16568648 |
| chr3 | 16570578 | 16571807 |
| chr3 | 16592030 | 16592905 |
| chr3 | 16592476 | 16592653 |
| chr3 | 17085554 | 17086438 |
| chr3 | 17162833 | 17163669 |
| chr3 | 17171464 | 17173133 |
| chr3 | 17242167 | 17244411 |
| chr3 | 17909225 | 17910028 |
| chr3 | 18466126 | 18466673 |
| chr3 | 19187905 | 19189029 |
| chr3 | 20095947 | 20095995 |
| chr3 | 20226860 | 20227483 |
| chr3 | 23061584 | 23062318 |
| chr3 | 23103885 | 23104864 |
| chr3 | 23958218 | 23958724 |
| chr3 | 23959095 | 23959308 |
| chr3 | 24357968 | 24358692 |
| chr3 | 24535305 | 24537657 |
| chr3 | 24562201 | 24562282 |

|      |          |          |
|------|----------|----------|
| chr3 | 24562201 | 24562283 |
| chr3 | 31082529 | 31083441 |
| chr3 | 31188537 | 31189750 |
| chr3 | 31477739 | 31479251 |
| chr3 | 31292746 | 31294236 |
| chr3 | 32835738 | 32835877 |
| chr3 | 32858039 | 32858881 |
| chr3 | 37609093 | 37611143 |
| chr3 | 37822945 | 37824444 |
| chr3 | 37823637 | 37823995 |
| chr3 | 38368473 | 38369689 |
| chr3 | 40528374 | 40529186 |
| chr3 | 40547455 | 40547689 |
| chr3 | 40576118 | 40576255 |
| chr3 | 40670068 | 40672112 |
| chr3 | 40672526 | 40673658 |
| chr3 | 41170891 | 41171941 |
| chr3 | 42954883 | 42957593 |
| chr3 | 42961152 | 42961897 |
| chr3 | 43395689 | 43396036 |
| chr3 | 44487842 | 44491228 |
| chr3 | 44489331 | 44489559 |
| chr3 | 44683780 | 44685032 |
| chr3 | 44724660 | 44726071 |
| chr3 | 44772309 | 44773317 |
| chr3 | 44774987 | 44777459 |
| chr3 | 44761300 | 44766238 |
| chr3 | 46072796 | 46074116 |
| chr3 | 46073632 | 46073987 |
| chr3 | 47022920 | 47024048 |
| chr3 | 48399419 | 48399820 |
| chr3 | 50358362 | 50359354 |
| chr3 | 51572243 | 51573299 |
| chr3 | 51572243 | 51572718 |
| chr3 | 58677152 | 58678191 |
| chr3 | 61604794 | 61657035 |
| chr3 | 61658393 | 61709652 |
| chr3 | 61689656 | 61689861 |
| chr3 | 61750008 | 61750118 |
| chr3 | 61793591 | 61798674 |
| chr3 | 61832901 | 61835113 |
| chr3 | 61846926 | 61855470 |
| chr3 | 61846987 | 61859174 |

|      |          |          |
|------|----------|----------|
| chr3 | 61882760 | 61891825 |
| chr3 | 61912918 | 61913961 |
| chr3 | 61922092 | 61922332 |
| chr3 | 61939529 | 61940195 |
| chr3 | 61944532 | 61946383 |
| chr3 | 61954627 | 61954839 |
| chr3 | 62044140 | 62044835 |
| chr3 | 62111030 | 62116224 |
| chr3 | 62135623 | 62135818 |
| chr3 | 62161470 | 62166551 |
| chr3 | 62184497 | 62185163 |
| chr3 | 62189683 | 62213971 |
| chr3 | 62303640 | 62305628 |
| chr3 | 62336224 | 62371957 |
| chr3 | 62340824 | 62341290 |
| chr3 | 62348762 | 62348864 |
| chr3 | 62351751 | 62368380 |
| chr3 | 62375407 | 62376664 |
| chr3 | 62380177 | 62385676 |
| chr3 | 62389817 | 62400135 |
| chr3 | 62410535 | 62426149 |
| chr3 | 62432042 | 62433148 |
| chr3 | 62435895 | 62436083 |
| chr3 | 62447112 | 62449655 |
| chr3 | 62462147 | 62462262 |
| chr3 | 62463080 | 62464971 |
| chr3 | 62468643 | 62473764 |
| chr3 | 62480670 | 62549585 |
| chr3 | 62490989 | 62491192 |
| chr3 | 62495197 | 62495329 |
| chr3 | 62532781 | 62532982 |
| chr3 | 62558964 | 62564007 |
| chr3 | 62692729 | 62693503 |
| chr3 | 62693945 | 62701100 |
| chr3 | 62701890 | 62706443 |
| chr3 | 62582040 | 62646387 |
| chr3 | 62658002 | 62692411 |
| chr3 | 62707398 | 62727319 |
| chr3 | 62728494 | 62733076 |
| chr3 | 62568408 | 62581816 |
| chr3 | 62646653 | 62657557 |
| chr3 | 62596902 | 62597007 |
| chr3 | 62597219 | 62597436 |

|      |          |          |
|------|----------|----------|
| chr3 | 62618255 | 62619392 |
| chr3 | 62622019 | 62622301 |
| chr3 | 62666670 | 62666867 |
| chr3 | 62672689 | 62672985 |
| chr3 | 62704362 | 62704573 |
| chr3 | 62704748 | 62704851 |
| chr3 | 62704749 | 62704961 |
| chr3 | 62711652 | 62711774 |
| chr3 | 62715588 | 62715844 |
| chr3 | 62731074 | 62731673 |
| chr3 | 62752065 | 62752698 |
| chr3 | 62781344 | 62782375 |
| chr3 | 62784629 | 62784941 |
| chr3 | 62785624 | 62785749 |
| chr3 | 62788646 | 62788803 |
| chr3 | 62789149 | 62789773 |
| chr3 | 62790926 | 62791712 |
| chr3 | 62799691 | 62833107 |
| chr3 | 62822053 | 62822167 |
| chr3 | 62823032 | 62823315 |
| chr3 | 62825318 | 62825538 |
| chr3 | 62825578 | 62825714 |
| chr3 | 62844558 | 62878852 |
| chr3 | 62890102 | 62890221 |
| chr3 | 62902748 | 62903777 |
| chr3 | 62915137 | 62915903 |
| chr3 | 62926854 | 62927102 |
| chr3 | 62928329 | 62928582 |
| chr3 | 62943316 | 62943816 |
| chr3 | 62950466 | 62950673 |
| chr3 | 62957650 | 62958322 |
| chr3 | 62963815 | 62979668 |
| chr3 | 62987035 | 62995653 |
| chr3 | 63022818 | 63023695 |
| chr3 | 63023986 | 63043853 |
| chr3 | 63058550 | 63059625 |
| chr3 | 63074614 | 63075841 |
| chr3 | 63100626 | 63119586 |
| chr3 | 63158018 | 63158131 |
| chr3 | 63203857 | 63215637 |
| chr3 | 63224460 | 63225634 |
| chr3 | 63225983 | 63227067 |
| chr3 | 63229907 | 63230022 |

|      |          |          |
|------|----------|----------|
| chr3 | 63237172 | 63237297 |
| chr3 | 63247899 | 63248608 |
| chr3 | 63250455 | 63250563 |
| chr3 | 63256266 | 63275524 |
| chr3 | 63276200 | 63277396 |
| chr3 | 63281279 | 63282281 |
| chr3 | 63281316 | 63286609 |
| chr3 | 63290642 | 63290867 |
| chr3 | 63291351 | 63292157 |
| chr3 | 63296238 | 63296452 |
| chr3 | 63298232 | 63298433 |
| chr3 | 63311247 | 63312318 |
| chr3 | 63315512 | 63315705 |
| chr3 | 63317285 | 63318464 |
| chr3 | 63319875 | 63320078 |
| chr3 | 63329359 | 63330052 |
| chr3 | 63336010 | 63336162 |
| chr3 | 63336281 | 63336487 |
| chr3 | 63336807 | 63337117 |
| chr3 | 63337528 | 63337686 |
| chr3 | 63338968 | 63340139 |
| chr3 | 63340946 | 63342625 |
| chr3 | 63354214 | 63354972 |
| chr3 | 63356746 | 63358230 |
| chr3 | 63371196 | 63378253 |
| chr3 | 63393947 | 63403025 |
| chr3 | 63379586 | 63393616 |
| chr3 | 63411688 | 63450937 |
| chr3 | 63423093 | 63423206 |
| chr3 | 63431350 | 63431561 |
| chr3 | 63435716 | 63435915 |
| chr3 | 63453994 | 63466150 |
| chr3 | 63458647 | 63458846 |
| chr3 | 63458914 | 63459025 |
| chr3 | 63460456 | 63460800 |
| chr3 | 63473443 | 63475420 |
| chr3 | 63494140 | 63533017 |
| chr3 | 63533344 | 63537081 |
| chr3 | 63541585 | 63541728 |
| chr3 | 63548002 | 63549579 |
| chr3 | 63550035 | 63569140 |
| chr3 | 63579233 | 63579862 |
| chr3 | 63595240 | 63605822 |

|      |          |          |
|------|----------|----------|
| chr3 | 63606750 | 63625951 |
| chr3 | 63629987 | 63630627 |
| chr3 | 63636850 | 63665871 |
| chr3 | 63692083 | 63692242 |
| chr3 | 63712925 | 63713187 |
| chr3 | 63739227 | 63739442 |
| chr3 | 63754168 | 63755088 |
| chr3 | 63776244 | 63785035 |
| chr3 | 63787578 | 63788598 |
| chr3 | 63803152 | 63805558 |
| chr3 | 63909012 | 63909138 |
| chr3 | 63915824 | 63934064 |
| chr3 | 63923648 | 63923810 |
| chr3 | 63926489 | 63926723 |
| chr3 | 63961891 | 63988250 |
| chr3 | 64014226 | 64015111 |
| chr3 | 64019511 | 64020048 |
| chr3 | 64029701 | 64054270 |
| chr3 | 64068858 | 64069593 |
| chr3 | 64070220 | 64070858 |
| chr3 | 64080267 | 64100496 |
| chr3 | 64105724 | 64161096 |
| chr3 | 64120699 | 64120902 |
| chr3 | 64120795 | 64120951 |
| chr3 | 64168870 | 64181849 |
| chr3 | 64172776 | 64172892 |
| chr3 | 64176988 | 64177090 |
| chr3 | 64185994 | 64259001 |
| chr3 | 64206866 | 64206968 |
| chr3 | 64222378 | 64222629 |
| chr3 | 64266017 | 64266151 |
| chr3 | 64272863 | 64274159 |
| chr3 | 64276455 | 64277724 |
| chr3 | 64288206 | 64288743 |
| chr3 | 64289443 | 64290256 |
| chr3 | 64303062 | 64304279 |
| chr3 | 64304697 | 64305344 |
| chr3 | 64307509 | 64308385 |
| chr3 | 64330147 | 64331339 |
| chr3 | 64336448 | 64357288 |
| chr3 | 64360306 | 64401495 |
| chr3 | 64404586 | 64405589 |
| chr3 | 64409408 | 64410117 |



|      |          |          |
|------|----------|----------|
| chr3 | 64419718 | 64461784 |
| chr3 | 64460514 | 64460773 |
| chr3 | 64460691 | 64460793 |
| chr3 | 64467560 | 64484553 |
| chr3 | 64486603 | 64487192 |
| chr3 | 64491542 | 64491657 |
| chr3 | 64504070 | 64504316 |
| chr3 | 64518370 | 64520404 |
| chr3 | 64523936 | 64527192 |
| chr3 | 64524606 | 64524837 |
| chr3 | 64524858 | 64525047 |
| chr3 | 64534400 | 64535580 |
| chr3 | 64540509 | 64541773 |
| chr3 | 64551411 | 64594925 |
| chr3 | 64557963 | 64558189 |
| chr3 | 64564655 | 64564768 |
| chr3 | 64574942 | 64575150 |
| chr3 | 64575042 | 64575182 |
| chr3 | 64576537 | 64576872 |
| chr3 | 64612985 | 64613937 |
| chr3 | 64634898 | 64640096 |
| chr3 | 64658666 | 64659230 |
| chr3 | 64665390 | 64679562 |
| chr3 | 64708061 | 64717930 |
| chr3 | 64721008 | 64728210 |
| chr3 | 64723337 | 64733659 |
| chr3 | 64741667 | 64751293 |
| chr3 | 64777607 | 64804891 |
| chr3 | 64822630 | 64823328 |
| chr3 | 64848563 | 64848808 |
| chr3 | 64890806 | 64913154 |
| chr3 | 64925599 | 64928231 |
| chr3 | 66024202 | 66025127 |
| chr3 | 66080929 | 66081783 |
| chr3 | 66080929 | 66081428 |
| chr3 | 72115047 | 72115887 |
| chr3 | 72124455 | 72125630 |
| chr3 | 72273345 | 72274732 |
| chr3 | 72676890 | 72677941 |
| chr3 | 87790221 | 87792613 |
| chr3 | 90473629 | 90473864 |
| chr3 | 90494575 | 90494810 |
| chr3 | 90495263 | 90495414 |

|      |           |           |
|------|-----------|-----------|
| chr3 | 90495298  | 90495506  |
| chr3 | 94192588  | 94193280  |
| chr3 | 98241001  | 98241852  |
| chr3 | 99523024  | 99525464  |
| chr3 | 101292430 | 101292874 |
| chr3 | 107646021 | 107646768 |
| chr3 | 107646575 | 107646686 |
| chr3 | 107720329 | 107720773 |
| chr3 | 107809840 | 107810932 |
| chr3 | 110790530 | 110791361 |
| chr3 | 113254896 | 113256468 |
| chr3 | 113259828 | 113261310 |
| chr3 | 119005251 | 119006313 |
| chr3 | 122101540 | 122102311 |
| chr3 | 122101560 | 122102311 |
| chr3 | 122623831 | 122624775 |
| chr3 | 123038690 | 123039600 |
| chr3 | 123128459 | 123129321 |
| chr3 | 123545412 | 123546437 |
| chr3 | 124274258 | 124275233 |
| chr3 | 124305448 | 124306530 |
| chr3 | 124311268 | 124312453 |
| chr3 | 124305949 | 124306051 |
| chr3 | 124532910 | 124534278 |
| chr3 | 125821383 | 125822186 |
| chr3 | 126048890 | 126049469 |
| chr3 | 126378702 | 126379630 |
| chr3 | 126692914 | 126694399 |
| chr3 | 126830648 | 126831536 |
| chr3 | 126831818 | 126833181 |
| chr3 | 127074917 | 127076327 |
| chr3 | 127308532 | 127309980 |
| chr3 | 127943623 | 127944444 |
| chr3 | 128399616 | 128400445 |
| chr3 | 128428374 | 128429162 |
| chr3 | 128428800 | 128428900 |
| chr3 | 128572436 | 128574260 |
| chr3 | 128575220 | 128576475 |
| chr3 | 128576679 | 128580058 |
| chr3 | 128579331 | 128579474 |
| chr3 | 128732257 | 128733231 |
| chr3 | 128771894 | 128772850 |
| chr3 | 129098457 | 129099547 |

|      |           |           |
|------|-----------|-----------|
| chr3 | 129204246 | 129205577 |
| chr3 | 129224958 | 129226242 |
| chr3 | 129647933 | 129648984 |
| chr3 | 131221269 | 131222049 |
| chr3 | 132085777 | 132086700 |
| chr3 | 133233332 | 133233458 |
| chr3 | 133233339 | 133233554 |
| chr3 | 133234114 | 133234311 |
| chr3 | 133510234 | 133512705 |
| chr3 | 133760873 | 133766235 |
| chr3 | 133764056 | 133764325 |
| chr3 | 134076316 | 134077357 |
| chr3 | 134356243 | 134357069 |
| chr3 | 135915518 | 135916059 |
| chr3 | 135968824 | 135969853 |
| chr3 | 136612530 | 136613308 |
| chr3 | 138633698 | 138634664 |
| chr3 | 139634844 | 139636355 |
| chr3 | 139634844 | 139636268 |
| chr3 | 139653547 | 139654293 |
| chr3 | 140833732 | 140834637 |
| chr3 | 141030090 | 141030636 |
| chr3 | 141378413 | 141379303 |
| chr3 | 141378413 | 141379303 |
| chr3 | 147583187 | 147583394 |
| chr3 | 147594599 | 147595861 |
| chr3 | 147599241 | 147600273 |
| chr3 | 148846854 | 148847925 |
| chr3 | 149103655 | 149105204 |
| chr3 | 149107131 | 149108144 |
| chr3 | 149191369 | 149192225 |
| chr3 | 149375682 | 149377060 |
| chr3 | 149687368 | 149688421 |
| chr3 | 149811944 | 149813349 |
| chr3 | 149954894 | 149957055 |
| chr3 | 149986172 | 149987095 |
| chr3 | 149997883 | 149998598 |
| chr3 | 150062351 | 150063465 |
| chr3 | 149812421 | 149812553 |
| chr3 | 150378430 | 150378652 |
| chr3 | 150481588 | 150481704 |
| chr3 | 150804216 | 150805209 |
| chr3 | 150804216 | 150805209 |

|      |           |           |
|------|-----------|-----------|
| chr3 | 151526841 | 151527728 |
| chr3 | 151526841 | 151527728 |
| chr3 | 155448658 | 155449228 |
| chr3 | 155462076 | 155462308 |
| chr3 | 155462374 | 155462715 |
| chr3 | 155462836 | 155463094 |
| chr3 | 155572112 | 155572703 |
| chr3 | 156346674 | 156347567 |
| chr3 | 156464205 | 156465793 |
| chr3 | 156530309 | 156531370 |
| chr3 | 156877757 | 156878798 |
| chr3 | 157827206 | 157828561 |
| chr3 | 157827485 | 157827679 |
| chr3 | 157828158 | 157828392 |
| chr3 | 160167048 | 160168085 |
| chr3 | 160177851 | 160178561 |
| chr3 | 160781934 | 160783007 |
| chr3 | 160787299 | 160789100 |
| chr3 | 160821877 | 160823670 |
| chr3 | 160992331 | 160993029 |
| chr3 | 160993428 | 160996669 |
| chr3 | 160996885 | 160998208 |
| chr3 | 160999269 | 161000805 |
| chr3 | 161007006 | 161009963 |
| chr3 | 161013132 | 161019324 |
| chr3 | 161024096 | 161028287 |
| chr3 | 161032146 | 161033643 |
| chr3 | 161038401 | 161040165 |
| chr3 | 161046409 | 161048528 |
| chr3 | 161056443 | 161058467 |
| chr3 | 161069599 | 161070515 |
| chr3 | 161088234 | 161091062 |
| chr3 | 161100010 | 161101122 |
| chr3 | 161106491 | 161108832 |
| chr3 | 161109726 | 161110676 |
| chr3 | 161113473 | 161115159 |
| chr3 | 161129348 | 161130882 |
| chr3 | 161133241 | 161134745 |
| chr3 | 161144134 | 161145463 |
| chr3 | 161150531 | 161152212 |
| chr3 | 161155112 | 161156409 |
| chr3 | 161161406 | 161162617 |
| chr3 | 161174467 | 161175318 |

|      |           |           |
|------|-----------|-----------|
| chr3 | 161180167 | 161181718 |
| chr3 | 161021433 | 161023021 |
| chr3 | 161054278 | 161055799 |
| chr3 | 161070808 | 161071989 |
| chr3 | 161169165 | 161170167 |
| chr3 | 160993769 | 160994273 |
| chr3 | 161088667 | 161091062 |
| chr3 | 161110488 | 161110676 |
| chr3 | 161277122 | 161278648 |
| chr3 | 161277872 | 161278042 |
| chr3 | 164239586 | 164239686 |
| chr3 | 167812498 | 167812822 |
| chr3 | 168988486 | 168989525 |
| chr3 | 169375162 | 169376130 |
| chr3 | 169378997 | 169380803 |
| chr3 | 169679022 | 169680383 |
| chr3 | 169683920 | 169684977 |
| chr3 | 170210289 | 170211566 |
| chr3 | 170880291 | 170881775 |
| chr3 | 171541710 | 171542504 |
| chr3 | 171547513 | 171548651 |
| chr3 | 171571411 | 171573672 |
| chr3 | 175096277 | 175096791 |
| chr3 | 175659256 | 175659357 |
| chr3 | 176231545 | 176232545 |
| chr3 | 176232019 | 176232726 |
| chr3 | 176634765 | 176635031 |
| chr3 | 177175286 | 177176242 |
| chr3 | 177243859 | 177244718 |
| chr3 | 182456516 | 182457697 |
| chr3 | 183012726 | 183013694 |
| chr3 | 183851648 | 183853316 |
| chr3 | 183965885 | 183967464 |
| chr3 | 184032845 | 184033834 |
| chr3 | 184418194 | 184419260 |
| chr3 | 184869524 | 184870896 |
| chr3 | 184869524 | 184870896 |
| chr3 | 185216711 | 185217698 |
| chr3 | 186924512 | 186926633 |
| chr3 | 186926009 | 186926111 |
| chr3 | 187526706 | 187527522 |
| chr3 | 189041987 | 189042059 |
| chr3 | 189541017 | 189541295 |

|      |           |           |
|------|-----------|-----------|
| chr3 | 191217083 | 191217586 |
| chr3 | 192231425 | 192232347 |
| chr3 | 192444689 | 192445481 |
| chr3 | 192633898 | 192635149 |
| chr3 | 193310393 | 193310884 |
| chr3 | 193311031 | 193311619 |
| chr3 | 193467716 | 193468971 |
| chr3 | 193473213 | 193475372 |
| chr3 | 193509085 | 193510268 |
| chr3 | 193522870 | 193523928 |
| chr3 | 193534227 | 193535522 |
| chr3 | 193603386 | 193604317 |
| chr3 | 193622080 | 193623083 |
| chr3 | 193627936 | 193628939 |
| chr3 | 193672033 | 193673528 |
| chr3 | 193720510 | 193721881 |
| chr3 | 193768264 | 193769635 |
| chr3 | 193807005 | 193808211 |
| chr3 | 193852135 | 193854085 |
| chr3 | 193876297 | 193877472 |
| chr3 | 193988210 | 193989619 |
| chr3 | 194010446 | 194011296 |
| chr3 | 194036383 | 194037296 |
| chr3 | 194053366 | 194054853 |
| chr3 | 193429063 | 193433910 |
| chr3 | 193624788 | 193627178 |
| chr3 | 194353043 | 194353687 |
| chr3 | 194392753 | 194393617 |
| chr3 | 194403534 | 194404596 |
| chr3 | 194604515 | 194605362 |
| chr3 | 194403534 | 194404596 |
| chr3 | 194652974 | 194654269 |
| chr3 | 194655277 | 194656550 |
| chr3 | 195425230 | 195425260 |
| chr3 | 195425525 | 195425735 |
| chr3 | 195425804 | 195425952 |
| chr3 | 195428434 | 195428940 |
| chr3 | 195434989 | 195436882 |
| chr3 | 195447511 | 195448288 |
| chr3 | 195634058 | 195635662 |
| chr3 | 196245868 | 196246970 |
| chr3 | 196387230 | 196388106 |
| chr3 | 196625601 | 196625867 |

|      |           |           |
|------|-----------|-----------|
| chr3 | 196668696 | 196669920 |
| chr3 | 196974603 | 196976704 |
| chr3 | 196968353 | 196972550 |
| chr3 | 197086578 | 197087941 |
| chr3 | 197183143 | 197184123 |
| chr3 | 197266154 | 197267261 |
| chr3 | 197289221 | 197291138 |
| chr3 | 197476306 | 197476449 |
| chr3 | 197684536 | 197685558 |
| chr4 | 27872     | 30148     |
| chr4 | 35633     | 37635     |
| chr4 | 71656     | 73000     |
| chr4 | 75538     | 77048     |
| chr4 | 39515     | 70361     |
| chr4 | 27872     | 30020     |
| chr4 | 27933     | 28228     |
| chr4 | 28827     | 29110     |
| chr4 | 35799     | 36075     |
| chr4 | 36611     | 37425     |
| chr4 | 40979     | 41413     |
| chr4 | 41833     | 41977     |
| chr4 | 41834     | 42372     |
| chr4 | 42418     | 60537     |
| chr4 | 61957     | 62469     |
| chr4 | 63683     | 63794     |
| chr4 | 64231     | 65284     |
| chr4 | 65537     | 65771     |
| chr4 | 66592     | 66804     |
| chr4 | 66653     | 66808     |
| chr4 | 66931     | 67165     |
| chr4 | 67914     | 68491     |
| chr4 | 109013    | 110081    |
| chr4 | 459448    | 460923    |
| chr4 | 481233    | 482207    |
| chr4 | 485628    | 487287    |
| chr4 | 1246432   | 1247946   |
| chr4 | 1486567   | 1487843   |
| chr4 | 1739609   | 1740754   |
| chr4 | 1247733   | 1247935   |
| chr4 | 2983764   | 2984219   |
| chr4 | 6060696   | 6061395   |
| chr4 | 6506069   | 6507451   |
| chr4 | 7087594   | 7089216   |

|      |           |           |
|------|-----------|-----------|
| chr4 | 7554614   | 7555821   |
| chr4 | 7577720   | 7579133   |
| chr4 | 8065236   | 8066697   |
| chr4 | 8094835   | 8096275   |
| chr4 | 8363428   | 8364837   |
| chr4 | 8902621   | 8903968   |
| chr4 | 24966406  | 24968842  |
| chr4 | 26114326  | 26115991  |
| chr4 | 28015537  | 28017163  |
| chr4 | 39486054  | 39487297  |
| chr4 | 49092934  | 49095113  |
| chr4 | 49104164  | 49105216  |
| chr4 | 49105805  | 49108038  |
| chr4 | 49108906  | 49110994  |
| chr4 | 49111364  | 49112322  |
| chr4 | 49114074  | 49114732  |
| chr4 | 49120144  | 49123387  |
| chr4 | 49118221  | 49119471  |
| chr4 | 49153767  | 49157694  |
| chr4 | 49150650  | 49153442  |
| chr4 | 49514634  | 49514879  |
| chr4 | 49515337  | 49515503  |
| chr4 | 49638744  | 49640604  |
| chr4 | 49643536  | 49644496  |
| chr4 | 49644846  | 49647416  |
| chr4 | 49648551  | 49651082  |
| chr4 | 49651933  | 49653108  |
| chr4 | 49653700  | 49654959  |
| chr4 | 49655279  | 49658274  |
| chr4 | 49658964  | 49660169  |
| chr4 | 55106805  | 55107319  |
| chr4 | 55316127  | 55317018  |
| chr4 | 68263572  | 68267350  |
| chr4 | 73902718  | 73903287  |
| chr4 | 83294743  | 83295842  |
| chr4 | 84885892  | 84886343  |
| chr4 | 97371496  | 97371934  |
| chr4 | 99585733  | 99586837  |
| chr4 | 103382682 | 103383323 |
| chr4 | 105783108 | 105784109 |
| chr4 | 106629440 | 106630184 |
| chr4 | 116935538 | 116938628 |
| chr4 | 140559153 | 140560182 |



|      |           |           |
|------|-----------|-----------|
| chr4 | 152867468 | 152868436 |
| chr4 | 152898217 | 152899091 |
| chr4 | 155794703 | 155795937 |
| chr4 | 162177650 | 162177894 |
| chr4 | 164113354 | 164116514 |
| chr4 | 170253738 | 170254455 |
| chr4 | 190200436 | 190201161 |
| chr4 | 190560122 | 190561168 |
| chr4 | 190570708 | 190571790 |
| chr4 | 190574340 | 190575403 |
| chr4 | 190620495 | 190621510 |
| chr4 | 190625668 | 190626912 |
| chr4 | 190637164 | 190638452 |
| chr4 | 190648919 | 190650031 |
| chr4 | 191028422 | 191028730 |
| chr4 | 191029148 | 191029756 |
| chr4 | 191029926 | 191030233 |
| chr4 | 191032566 | 191032744 |
| chr4 | 191032942 | 191033162 |
| chr4 | 191033536 | 191033705 |
| chr5 | 90406     | 91701     |
| chr5 | 90406     | 91701     |
| chr5 | 596770    | 597743    |
| chr5 | 612655    | 614054    |
| chr5 | 958550    | 959250    |
| chr5 | 966939    | 968071    |
| chr5 | 1145795   | 1146662   |
| chr5 | 1097328   | 1098010   |
| chr5 | 1314226   | 1315197   |
| chr5 | 1453328   | 1455335   |
| chr5 | 1455657   | 1458912   |
| chr5 | 1516072   | 1517122   |
| chr5 | 1554969   | 1555960   |
| chr5 | 1516350   | 1516550   |
| chr5 | 1642702   | 1643252   |
| chr5 | 1743250   | 1744058   |
| chr5 | 1974972   | 1975082   |
| chr5 | 1975004   | 1975205   |
| chr5 | 2756394   | 2757385   |
| chr5 | 3373148   | 3373167   |
| chr5 | 6123753   | 6124557   |
| chr5 | 6267345   | 6268278   |
| chr5 | 6495090   | 6496665   |

|      |          |          |
|------|----------|----------|
| chr5 | 6542574  | 6543469  |
| chr5 | 6755562  | 6756368  |
| chr5 | 6820551  | 6821876  |
| chr5 | 6856565  | 6857311  |
| chr5 | 6888838  | 6889996  |
| chr5 | 7396381  | 7397340  |
| chr5 | 9023513  | 9024322  |
| chr5 | 9042138  | 9042971  |
| chr5 | 9107611  | 9108530  |
| chr5 | 9524081  | 9525091  |
| chr5 | 9544337  | 9545410  |
| chr5 | 9610021  | 9610834  |
| chr5 | 9621623  | 9622659  |
| chr5 | 9747294  | 9748124  |
| chr5 | 9821054  | 9822461  |
| chr5 | 9852939  | 9854312  |
| chr5 | 9864649  | 9866651  |
| chr5 | 10051266 | 10052149 |
| chr5 | 10193652 | 10194637 |
| chr5 | 10249639 | 10250965 |
| chr5 | 10310192 | 10311298 |
| chr5 | 10365958 | 10366801 |
| chr5 | 10441638 | 10442495 |
| chr5 | 10456760 | 10458667 |
| chr5 | 10466896 | 10468012 |
| chr5 | 10493350 | 10495554 |
| chr5 | 10553902 | 10556001 |
| chr5 | 10559512 | 10560343 |
| chr5 | 10563632 | 10564795 |
| chr5 | 10701363 | 10702612 |
| chr5 | 10824323 | 10825260 |
| chr5 | 9813696  | 9814580  |
| chr5 | 11173840 | 11174605 |
| chr5 | 10353085 | 10355542 |
| chr5 | 9610495  | 9610736  |
| chr5 | 10457049 | 10457253 |
| chr5 | 10457288 | 10457398 |
| chr5 | 10555461 | 10555623 |
| chr5 | 10560280 | 10560343 |
| chr5 | 10564639 | 10564795 |
| chr5 | 11903944 | 11905190 |
| chr5 | 12299126 | 12299930 |
| chr5 | 13080646 | 13081481 |

|      |          |          |
|------|----------|----------|
| chr5 | 13226665 | 13227830 |
| chr5 | 13879197 | 13881610 |
| chr5 | 14142012 | 14142839 |
| chr5 | 14143801 | 14144996 |
| chr5 | 14163851 | 14165180 |
| chr5 | 14166891 | 14167704 |
| chr5 | 14177724 | 14178556 |
| chr5 | 14255430 | 14257703 |
| chr5 | 14574891 | 14575621 |
| chr5 | 14580449 | 14581323 |
| chr5 | 14585291 | 14586261 |
| chr5 | 14601452 | 14602206 |
| chr5 | 14664239 | 14665130 |
| chr5 | 14819191 | 14819964 |
| chr5 | 14849204 | 14850809 |
| chr5 | 14940898 | 14941747 |
| chr5 | 15014602 | 15015721 |
| chr5 | 15089939 | 15090968 |
| chr5 | 16178640 | 16179362 |
| chr5 | 16178640 | 16179362 |
| chr5 | 16936892 | 16936952 |
| chr5 | 17215743 | 17217058 |
| chr5 | 21564729 | 21565530 |
| chr5 | 31859873 | 31860136 |
| chr5 | 33040784 | 33041476 |
| chr5 | 33440179 | 33441808 |
| chr5 | 34192184 | 34192426 |
| chr5 | 34556195 | 34557066 |
| chr5 | 36084989 | 36086332 |
| chr5 | 36744852 | 36745995 |
| chr5 | 36763173 | 36764210 |
| chr5 | 37774515 | 37775838 |
| chr5 | 37958670 | 37959960 |
| chr5 | 38617824 | 38619174 |
| chr5 | 39716272 | 39717119 |
| chr5 | 40835107 | 40835362 |
| chr5 | 42582975 | 42583847 |
| chr5 | 42951478 | 42952169 |
| chr5 | 42991767 | 42992649 |
| chr5 | 43041818 | 43043361 |
| chr5 | 43105666 | 43106081 |
| chr5 | 46299269 | 46299503 |
| chr5 | 46364111 | 46364305 |

|      |          |          |
|------|----------|----------|
| chr5 | 46366474 | 46366686 |
| chr5 | 46397638 | 46397848 |
| chr5 | 49405571 | 49406108 |
| chr5 | 49405786 | 49406043 |
| chr5 | 49414393 | 49414561 |
| chr5 | 49439994 | 49440594 |
| chr5 | 49440019 | 49440201 |
| chr5 | 49484769 | 49485002 |
| chr5 | 54152870 | 54154591 |
| chr5 | 55601699 | 55602947 |
| chr5 | 55913359 | 55914798 |
| chr5 | 56623403 | 56624189 |
| chr5 | 57157886 | 57159237 |
| chr5 | 57389940 | 57390650 |
| chr5 | 57770781 | 57772079 |
| chr5 | 61457857 | 61459077 |
| chr5 | 62327653 | 62329334 |
| chr5 | 64064123 | 64065261 |
| chr5 | 65762601 | 65766120 |
| chr5 | 65816279 | 65816554 |
| chr5 | 66531390 | 66532351 |
| chr5 | 67344187 | 67344924 |
| chr5 | 67510857 | 67511807 |
| chr5 | 67729332 | 67730317 |
| chr5 | 68227670 | 68228063 |
| chr5 | 68228729 | 68228932 |
| chr5 | 68788371 | 68788804 |
| chr5 | 68789234 | 68789457 |
| chr5 | 71146642 | 71146649 |
| chr5 | 71181941 | 71182815 |
| chr5 | 71695766 | 71697687 |
| chr5 | 71976802 | 71977426 |
| chr5 | 73371454 | 73372493 |
| chr5 | 73935845 | 73937149 |
| chr5 | 74212522 | 74213245 |
| chr5 | 74290129 | 74291132 |
| chr5 | 74345203 | 74346058 |
| chr5 | 76464303 | 76465464 |
| chr5 | 76526137 | 76527206 |
| chr5 | 76932132 | 76933077 |
| chr5 | 76932132 | 76933077 |
| chr5 | 78369063 | 78370253 |
| chr5 | 79286203 | 79287534 |

|      |           |           |
|------|-----------|-----------|
| chr5 | 79286203  | 79287534  |
| chr5 | 80507716  | 80508605  |
| chr5 | 82909863  | 82911142  |
| chr5 | 91097810  | 91099366  |
| chr5 | 92211132  | 92211358  |
| chr5 | 95066453  | 95068166  |
| chr5 | 95066453  | 95068166  |
| chr5 | 96270930  | 96271914  |
| chr5 | 102455543 | 102456110 |
| chr5 | 103514861 | 103515366 |
| chr5 | 103522399 | 103522749 |
| chr5 | 106211830 | 106212671 |
| chr5 | 106505874 | 106507168 |
| chr5 | 106600862 | 106601749 |
| chr5 | 106600862 | 106601516 |
| chr5 | 108063425 | 108064155 |
| chr5 | 109024278 | 109025851 |
| chr5 | 109024405 | 109024611 |
| chr5 | 109024514 | 109024617 |
| chr5 | 110427888 | 110428208 |
| chr5 | 110974432 | 110976376 |
| chr5 | 111016216 | 111017134 |
| chr5 | 111967108 | 111968502 |
| chr5 | 114500697 | 114501703 |
| chr5 | 114501947 | 114503587 |
| chr5 | 115880824 | 115882025 |
| chr5 | 115881888 | 115882025 |
| chr5 | 115996482 | 115998045 |
| chr5 | 116791186 | 116791789 |
| chr5 | 118755393 | 118756594 |
| chr5 | 121593761 | 121594042 |
| chr5 | 122491057 | 122491866 |
| chr5 | 122961325 | 122961732 |
| chr5 | 123272488 | 123273549 |
| chr5 | 123580448 | 123581732 |
| chr5 | 123598518 | 123599660 |
| chr5 | 123667292 | 123668009 |
| chr5 | 127111603 | 127113131 |
| chr5 | 127420133 | 127420339 |
| chr5 | 128429714 | 128430426 |
| chr5 | 128795678 | 128797192 |
| chr5 | 129240529 | 129241432 |
| chr5 | 130995570 | 130995879 |

|      |           |           |
|------|-----------|-----------|
| chr5 | 131334320 | 131335096 |
| chr5 | 131567939 | 131568845 |
| chr5 | 131706327 | 131707182 |
| chr5 | 131831409 | 131832506 |
| chr5 | 132361061 | 132362370 |
| chr5 | 132387005 | 132389180 |
| chr5 | 132400712 | 132401725 |
| chr5 | 132584375 | 132585515 |
| chr5 | 132793074 | 132794218 |
| chr5 | 132946368 | 132947464 |
| chr5 | 133328866 | 133329656 |
| chr5 | 133597776 | 133599086 |
| chr5 | 133619667 | 133621490 |
| chr5 | 133706607 | 133706894 |
| chr5 | 133779551 | 133780380 |
| chr5 | 133802354 | 133802858 |
| chr5 | 133862102 | 133863113 |
| chr5 | 134094001 | 134094803 |
| chr5 | 134260225 | 134260395 |
| chr5 | 134262633 | 134262874 |
| chr5 | 134416439 | 134417529 |
| chr5 | 134470325 | 134471319 |
| chr5 | 135468356 | 135469337 |
| chr5 | 136716647 | 136718151 |
| chr5 | 137687530 | 137688353 |
| chr5 | 138483967 | 138484109 |
| chr5 | 138483978 | 138484209 |
| chr5 | 139026853 | 139028209 |
| chr5 | 139028520 | 139029325 |
| chr5 | 139017460 | 139018610 |
| chr5 | 139034004 | 139034802 |
| chr5 | 139099368 | 139100261 |
| chr5 | 139026987 | 139027088 |
| chr5 | 139530299 | 139531149 |
| chr5 | 140006406 | 140008649 |
| chr5 | 140010793 | 140011874 |
| chr5 | 140659919 | 140661201 |
| chr5 | 140655905 | 140659238 |
| chr5 | 140698443 | 140700354 |
| chr5 | 140732551 | 140734509 |
| chr5 | 140735566 | 140737196 |
| chr5 | 140741641 | 140742701 |
| chr5 | 140743808 | 140745216 |

|      |           |           |
|------|-----------|-----------|
| chr5 | 140737882 | 140739308 |
| chr5 | 140750442 | 140755031 |
| chr5 | 140750883 | 140751404 |
| chr5 | 140753295 | 140754512 |
| chr5 | 140810920 | 140811348 |
| chr5 | 140854711 | 140855412 |
| chr5 | 141044242 | 141044934 |
| chr5 | 141016734 | 141018128 |
| chr5 | 141695352 | 141696419 |
| chr5 | 142974192 | 142975480 |
| chr5 | 146166910 | 146166974 |
| chr5 | 148508375 | 148509448 |
| chr5 | 148648037 | 148649283 |
| chr5 | 149452352 | 149453287 |
| chr5 | 149864975 | 149865825 |
| chr5 | 150080085 | 150081152 |
| chr5 | 150374687 | 150375179 |
| chr5 | 151001952 | 151002759 |
| chr5 | 151234445 | 151235262 |
| chr5 | 151310438 | 151311735 |
| chr5 | 153176370 | 153177412 |
| chr5 | 153418385 | 153419121 |
| chr5 | 153675924 | 153677165 |
| chr5 | 154053554 | 154054354 |
| chr5 | 154065602 | 154066895 |
| chr5 | 154092750 | 154093639 |
| chr5 | 154223966 | 154225105 |
| chr5 | 154236999 | 154238605 |
| chr5 | 154257724 | 154259069 |
| chr5 | 154264674 | 154266318 |
| chr5 | 154316655 | 154318455 |
| chr5 | 154675250 | 154676020 |
| chr5 | 154732252 | 154733600 |
| chr5 | 157459453 | 157460432 |
| chr5 | 158021696 | 158022729 |
| chr5 | 158812807 | 158814178 |
| chr5 | 158901624 | 158902914 |
| chr5 | 159037392 | 159038274 |
| chr5 | 167687156 | 167687659 |
| chr5 | 167711544 | 167712286 |
| chr5 | 169068181 | 169069166 |
| chr5 | 169637871 | 169638898 |
| chr5 | 169810003 | 169810846 |

|      |           |           |
|------|-----------|-----------|
| chr5 | 169874422 | 169875337 |
| chr5 | 169876218 | 169877063 |
| chr5 | 169920137 | 169920853 |
| chr5 | 170160711 | 170161571 |
| chr5 | 170288674 | 170289203 |
| chr5 | 170955010 | 170955867 |
| chr5 | 171184552 | 171185404 |
| chr5 | 171192965 | 171194614 |
| chr5 | 171238820 | 171240082 |
| chr5 | 171285218 | 171286219 |
| chr5 | 171797635 | 171797837 |
| chr5 | 171807634 | 171808605 |
| chr5 | 171877921 | 171878781 |
| chr5 | 171878499 | 171878642 |
| chr5 | 172067924 | 172069472 |
| chr5 | 172082016 | 172083546 |
| chr5 | 172143001 | 172144169 |
| chr5 | 172196986 | 172199473 |
| chr5 | 172209002 | 172210466 |
| chr5 | 172331196 | 172332816 |
| chr5 | 172571268 | 172572155 |
| chr5 | 172710322 | 172711405 |
| chr5 | 172734700 | 172735651 |
| chr5 | 172754969 | 172756328 |
| chr5 | 172757197 | 172757602 |
| chr5 | 172845596 | 172847129 |
| chr5 | 172876331 | 172877612 |
| chr5 | 172881409 | 172882932 |
| chr5 | 172887852 | 172889879 |
| chr5 | 172961979 | 172963340 |
| chr5 | 172986284 | 172991008 |
| chr5 | 172994116 | 172995961 |
| chr5 | 173006902 | 173009106 |
| chr5 | 173016862 | 173020311 |
| chr5 | 173081646 | 173083171 |
| chr5 | 172950127 | 172951518 |
| chr5 | 173012670 | 173016404 |
| chr5 | 173146759 | 173147529 |
| chr5 | 173179761 | 173181154 |
| chr5 | 173254965 | 173255878 |
| chr5 | 173314814 | 173314957 |
| chr5 | 173314819 | 173315115 |
| chr5 | 173842113 | 173843339 |



|      |           |           |
|------|-----------|-----------|
| chr5 | 173856809 | 173857771 |
| chr5 | 173918454 | 173919278 |
| chr5 | 173927434 | 173931464 |
| chr5 | 174042420 | 174043817 |
| chr5 | 175076663 | 175077752 |
| chr5 | 175112622 | 175113735 |
| chr5 | 175205682 | 175206972 |
| chr5 | 175206126 | 175206316 |
| chr5 | 175347706 | 175347857 |
| chr5 | 175348253 | 175350229 |
| chr5 | 175844169 | 175844409 |
| chr5 | 175873921 | 175875456 |
| chr5 | 176144700 | 176145606 |
| chr5 | 176192305 | 176193293 |
| chr5 | 176220353 | 176221353 |
| chr5 | 176237027 | 176238277 |
| chr5 | 176765870 | 176767004 |
| chr5 | 176816264 | 176817848 |
| chr5 | 176829217 | 176831742 |
| chr5 | 176850791 | 176851761 |
| chr5 | 176853852 | 176855334 |
| chr5 | 176914596 | 176915421 |
| chr5 | 176980495 | 176981357 |
| chr5 | 176988014 | 176988761 |
| chr5 | 176880875 | 176883809 |
| chr5 | 177026504 | 177027732 |
| chr5 | 177501327 | 177503877 |
| chr5 | 177504670 | 177506142 |
| chr5 | 177507003 | 177509239 |
| chr5 | 177511223 | 177512330 |
| chr5 | 177512791 | 177514897 |
| chr5 | 177517563 | 177518283 |
| chr5 | 177502161 | 177502361 |
| chr5 | 177502536 | 177503340 |
| chr5 | 177507398 | 177507499 |
| chr5 | 177532832 | 177536682 |
| chr5 | 177546858 | 177552494 |
| chr5 | 177557181 | 177558730 |
| chr5 | 177536945 | 177544211 |
| chr5 | 177553332 | 177554396 |
| chr5 | 177572612 | 177576003 |
| chr5 | 177576255 | 177577062 |
| chr5 | 177577730 | 177582234 |

|      |           |           |
|------|-----------|-----------|
| chr5 | 177632956 | 177633522 |
| chr5 | 177702289 | 177703755 |
| chr5 | 177711043 | 177711876 |
| chr5 | 177796743 | 177797817 |
| chr5 | 178012364 | 178012911 |
| chr5 | 178052963 | 178055094 |
| chr5 | 178095841 | 178096117 |
| chr5 | 178213575 | 178215072 |
| chr5 | 179221542 | 179222571 |
| chr5 | 179248481 | 179249015 |
| chr5 | 179288846 | 179289979 |
| chr5 | 179409198 | 179410248 |
| chr5 | 179635845 | 179635898 |
| chr5 | 180225869 | 180226775 |
| chr5 | 180236717 | 180238635 |
| chr5 | 180282616 | 180283598 |
| chr5 | 180256210 | 180257564 |
| chr5 | 180272950 | 180281997 |
| chr5 | 180257329 | 180257463 |
| chr5 | 180272950 | 180273053 |
| chr5 | 180273845 | 180273955 |
| chr5 | 180300711 | 180301514 |
| chr5 | 180490338 | 180491268 |
| chr5 | 180571702 | 180573187 |
| chr5 | 180599881 | 180600657 |
| chr5 | 180615517 | 180616385 |
| chr5 | 180631417 | 180632432 |
| chr5 | 180648749 | 180648976 |
| chr5 | 180649165 | 180649393 |
| chr6 | 291857    | 292836    |
| chr6 | 295912    | 296812    |
| chr6 | 299976    | 301464    |
| chr6 | 301695    | 303144    |
| chr6 | 303410    | 304334    |
| chr6 | 309895    | 311170    |
| chr6 | 316095    | 317645    |
| chr6 | 318155    | 318854    |
| chr6 | 319467    | 321836    |
| chr6 | 322365    | 323128    |
| chr6 | 331417    | 332929    |
| chr6 | 333543    | 334514    |
| chr6 | 335454    | 337085    |
| chr6 | 357102    | 358623    |

|      |          |          |
|------|----------|----------|
| chr6 | 361421   | 364458   |
| chr6 | 366419   | 367186   |
| chr6 | 369470   | 371013   |
| chr6 | 378562   | 380331   |
| chr6 | 381409   | 382330   |
| chr6 | 819214   | 819571   |
| chr6 | 1043693  | 1044541  |
| chr6 | 1610979  | 1611771  |
| chr6 | 2803794  | 2804734  |
| chr6 | 3664609  | 3665741  |
| chr6 | 3912444  | 3913341  |
| chr6 | 3977289  | 3977671  |
| chr6 | 4291349  | 4292378  |
| chr6 | 4311712  | 4312056  |
| chr6 | 4367576  | 4368432  |
| chr6 | 4381537  | 4382564  |
| chr6 | 4383607  | 4385866  |
| chr6 | 4471459  | 4472303  |
| chr6 | 4488057  | 4490287  |
| chr6 | 4629070  | 4629175  |
| chr6 | 5050953  | 5052375  |
| chr6 | 5102749  | 5103611  |
| chr6 | 5862130  | 5862850  |
| chr6 | 7852449  | 7852902  |
| chr6 | 9852476  | 9853205  |
| chr6 | 10403983 | 10404945 |
| chr6 | 10418940 | 10420018 |
| chr6 | 11044175 | 11045568 |
| chr6 | 11229489 | 11230417 |
| chr6 | 11396833 | 11397633 |
| chr6 | 11536239 | 11536343 |
| chr6 | 12331619 | 12332759 |
| chr6 | 12453635 | 12454879 |
| chr6 | 12492492 | 12493275 |
| chr6 | 13190719 | 13192004 |
| chr6 | 13191212 | 13191337 |
| chr6 | 14033265 | 14034168 |
| chr6 | 14263865 | 14264899 |
| chr6 | 15419255 | 15420428 |
| chr6 | 16239205 | 16240318 |
| chr6 | 16338631 | 16339589 |
| chr6 | 18265308 | 18266248 |
| chr6 | 19838071 | 19838859 |

|      |          |          |
|------|----------|----------|
| chr6 | 19838071 | 19838859 |
| chr6 | 21614468 | 21614929 |
| chr6 | 26025635 | 26026022 |
| chr6 | 26295450 | 26296694 |
| chr6 | 26537931 | 26538033 |
| chr6 | 27356448 | 27356554 |
| chr6 | 27652227 | 27652431 |
| chr6 | 28155368 | 28157010 |
| chr6 | 33693169 | 33694143 |
| chr6 | 34112446 | 34113804 |
| chr6 | 34117093 | 34117907 |
| chr6 | 34127197 | 34128453 |
| chr6 | 34489878 | 34490800 |
| chr6 | 34525697 | 34526824 |
| chr6 | 34542520 | 34543673 |
| chr6 | 34503915 | 34505197 |
| chr6 | 34760185 | 34760211 |
| chr6 | 35285670 | 35286606 |
| chr6 | 36107698 | 36108433 |
| chr6 | 36705337 | 36706148 |
| chr6 | 36800598 | 36801517 |
| chr6 | 36986094 | 36987001 |
| chr6 | 36986094 | 36986436 |
| chr6 | 37400553 | 37401392 |
| chr6 | 37621113 | 37622454 |
| chr6 | 37663851 | 37664654 |
| chr6 | 39144665 | 39145483 |
| chr6 | 39237508 | 39238306 |
| chr6 | 39965463 | 39967531 |
| chr6 | 40150314 | 40152420 |
| chr6 | 41159247 | 41160346 |
| chr6 | 41181729 | 41183112 |
| chr6 | 41229360 | 41230664 |
| chr6 | 41394818 | 41395688 |
| chr6 | 41396088 | 41397186 |
| chr6 | 41513485 | 41514365 |
| chr6 | 41544892 | 41545743 |
| chr6 | 39960219 | 39961572 |
| chr6 | 42419916 | 42421167 |
| chr6 | 43213849 | 43214641 |
| chr6 | 43243342 | 43244184 |
| chr6 | 43213849 | 43214641 |
| chr6 | 43463805 | 43464980 |

|      |          |          |
|------|----------|----------|
| chr6 | 43477200 | 43478297 |
| chr6 | 43484462 | 43485373 |
| chr6 | 43597325 | 43598246 |
| chr6 | 43634904 | 43636371 |
| chr6 | 43776925 | 43777984 |
| chr6 | 43854486 | 43855274 |
| chr6 | 44095244 | 44096047 |
| chr6 | 44213536 | 44215813 |
| chr6 | 44224916 | 44225825 |
| chr6 | 44667180 | 44668030 |
| chr6 | 45583362 | 45584270 |
| chr6 | 45649479 | 45650291 |
| chr6 | 45668798 | 45669698 |
| chr6 | 45982713 | 45983839 |
| chr6 | 46728561 | 46729327 |
| chr6 | 47171404 | 47172652 |
| chr6 | 47172293 | 47172406 |
| chr6 | 47172465 | 47172627 |
| chr6 | 48357407 | 48357817 |
| chr6 | 52740697 | 52741999 |
| chr6 | 53323298 | 53323356 |
| chr6 | 56304106 | 56305553 |
| chr6 | 56305497 | 56305553 |
| chr6 | 57265401 | 57265782 |
| chr6 | 57311947 | 57312436 |
| chr6 | 57387986 | 57388725 |
| chr6 | 57390797 | 57391436 |
| chr6 | 57409077 | 57409082 |
| chr6 | 57412301 | 57412535 |
| chr6 | 57420331 | 57421437 |
| chr6 | 57431854 | 57432062 |
| chr6 | 57450214 | 57452145 |
| chr6 | 57452700 | 57453837 |
| chr6 | 57460068 | 57461116 |
| chr6 | 57462013 | 57463781 |
| chr6 | 57467179 | 57468007 |
| chr6 | 57468451 | 57469389 |
| chr6 | 57471521 | 57472413 |
| chr6 | 57476988 | 57477963 |
| chr6 | 57474967 | 57476215 |
| chr6 | 57451626 | 57451854 |
| chr6 | 57467179 | 57467290 |
| chr6 | 57474967 | 57474972 |

|      |           |           |
|------|-----------|-----------|
| chr6 | 57475081  | 57475364  |
| chr6 | 57481958  | 57482816  |
| chr6 | 57483935  | 57485398  |
| chr6 | 57488413  | 57489354  |
| chr6 | 57497752  | 57499565  |
| chr6 | 57501264  | 57502635  |
| chr6 | 57491097  | 57492632  |
| chr6 | 57518831  | 57519777  |
| chr6 | 57526463  | 57528198  |
| chr6 | 57541050  | 57541961  |
| chr6 | 57544527  | 57546427  |
| chr6 | 57523871  | 57525128  |
| chr6 | 57525064  | 57525128  |
| chr6 | 57556100  | 57556476  |
| chr6 | 57561670  | 57562828  |
| chr6 | 58772897  | 58780205  |
| chr6 | 61911336  | 61911576  |
| chr6 | 61913363  | 61913597  |
| chr6 | 75214644  | 75215031  |
| chr6 | 78221070  | 78222025  |
| chr6 | 81429927  | 81430441  |
| chr6 | 83168419  | 83168628  |
| chr6 | 83397402  | 83398441  |
| chr6 | 84577166  | 84577339  |
| chr6 | 85457532  | 85458360  |
| chr6 | 85767596  | 85768689  |
| chr6 | 87864528  | 87865503  |
| chr6 | 89993673  | 89993792  |
| chr6 | 90779487  | 90780232  |
| chr6 | 90907470  | 90907836  |
| chr6 | 94128616  | 94129459  |
| chr6 | 96462733  | 96463851  |
| chr6 | 106516610 | 106517507 |
| chr6 | 106516650 | 106516757 |
| chr6 | 107221088 | 107222127 |
| chr6 | 107307505 | 107307626 |
| chr6 | 107930566 | 107931481 |
| chr6 | 108003895 | 108004685 |
| chr6 | 108060627 | 108061748 |
| chr6 | 108455571 | 108456327 |
| chr6 | 109023168 | 109024435 |
| chr6 | 109028352 | 109029408 |
| chr6 | 109038022 | 109038859 |

|      |           |           |
|------|-----------|-----------|
| chr6 | 109060203 | 109061509 |
| chr6 | 109106580 | 109107746 |
| chr6 | 109762333 | 109762769 |
| chr6 | 109836477 | 109837340 |
| chr6 | 110783701 | 110784810 |
| chr6 | 110855725 | 110857185 |
| chr6 | 110872610 | 110873884 |
| chr6 | 111408333 | 111410040 |
| chr6 | 112306843 | 112307759 |
| chr6 | 114455401 | 114456410 |
| chr6 | 116422332 | 116422772 |
| chr6 | 119106501 | 119107285 |
| chr6 | 119403605 | 119406082 |
| chr6 | 120244713 | 120245768 |
| chr6 | 124699025 | 124699789 |
| chr6 | 125773640 | 125775707 |
| chr6 | 125905366 | 125906093 |
| chr6 | 126003341 | 126004836 |
| chr6 | 126277741 | 126278431 |
| chr6 | 127836628 | 127837995 |
| chr6 | 131070612 | 131071644 |
| chr6 | 131070612 | 131071025 |
| chr6 | 132128201 | 132128972 |
| chr6 | 132129332 | 132129763 |
| chr6 | 132164859 | 132165933 |
| chr6 | 132786365 | 132786685 |
| chr6 | 132786365 | 132786703 |
| chr6 | 134216584 | 134217428 |
| chr6 | 134216584 | 134217428 |
| chr6 | 136400151 | 136401026 |
| chr6 | 137484290 | 137485072 |
| chr6 | 137484372 | 137485505 |
| chr6 | 138316514 | 138316612 |
| chr6 | 138438443 | 138439588 |
| chr6 | 138428259 | 138429067 |
| chr6 | 138483260 | 138483369 |
| chr6 | 138483371 | 138483759 |
| chr6 | 138483820 | 138484054 |
| chr6 | 138484287 | 138484302 |
| chr6 | 138498554 | 138499458 |
| chr6 | 139613061 | 139613148 |
| chr6 | 139697297 | 139698606 |
| chr6 | 142855055 | 142857627 |

|      |           |           |
|------|-----------|-----------|
| chr6 | 142855592 | 142855797 |
| chr6 | 142968444 | 142969277 |
| chr6 | 143846099 | 143846940 |
| chr6 | 144267974 | 144268959 |
| chr6 | 144385109 | 144385919 |
| chr6 | 144523491 | 144524948 |
| chr6 | 147226057 | 147227307 |
| chr6 | 147286445 | 147286545 |
| chr6 | 148535728 | 148536565 |
| chr6 | 149293339 | 149293659 |
| chr6 | 149381979 | 149383019 |
| chr6 | 149442228 | 149443121 |
| chr6 | 149866618 | 149867157 |
| chr6 | 150228973 | 150230388 |
| chr6 | 150468095 | 150469003 |
| chr6 | 150618161 | 150619022 |
| chr6 | 150662908 | 150664005 |
| chr6 | 150903990 | 150904787 |
| chr6 | 151926372 | 151926583 |
| chr6 | 151929882 | 151930094 |
| chr6 | 151947767 | 151952515 |
| chr6 | 151953181 | 151955565 |
| chr6 | 151939291 | 151939884 |
| chr6 | 151973818 | 151973936 |
| chr6 | 151989706 | 151990568 |
| chr6 | 151996431 | 151997658 |
| chr6 | 154488236 | 154489234 |
| chr6 | 155675004 | 155675005 |
| chr6 | 158401232 | 158402098 |
| chr6 | 158401560 | 158401961 |
| chr6 | 159836061 | 159837260 |
| chr6 | 159854561 | 159855411 |
| chr6 | 161747961 | 161748907 |
| chr6 | 168439748 | 168441501 |
| chr6 | 170231715 | 170232502 |
| chr6 | 170346032 | 170346850 |
| chr6 | 170753900 | 170754818 |
| chr7 | 112742    | 113749    |
| chr7 | 114093    | 115380    |
| chr7 | 301737    | 302952    |
| chr7 | 312749    | 313956    |
| chr7 | 358915    | 359999    |
| chr7 | 423969    | 424815    |



|      |         |         |
|------|---------|---------|
| chr7 | 435095  | 437166  |
| chr7 | 437379  | 440295  |
| chr7 | 457169  | 458679  |
| chr7 | 499152  | 499977  |
| chr7 | 577432  | 578679  |
| chr7 | 578889  | 579941  |
| chr7 | 441612  | 442848  |
| chr7 | 474586  | 475526  |
| chr7 | 764771  | 766506  |
| chr7 | 772310  | 772991  |
| chr7 | 906504  | 907616  |
| chr7 | 1014865 | 1015901 |
| chr7 | 1052914 | 1053634 |
| chr7 | 1066636 | 1067777 |
| chr7 | 1068033 | 1069147 |
| chr7 | 1126192 | 1127969 |
| chr7 | 1135558 | 1136592 |
| chr7 | 1494729 | 1496155 |
| chr7 | 1499932 | 1502040 |
| chr7 | 1375825 | 1376954 |
| chr7 | 1441563 | 1443059 |
| chr7 | 1576263 | 1577529 |
| chr7 | 1594661 | 1596300 |
| chr7 | 1609079 | 1609355 |
| chr7 | 1609593 | 1610384 |
| chr7 | 1628146 | 1629483 |
| chr7 | 1722255 | 1724965 |
| chr7 | 1741987 | 1742034 |
| chr7 | 1742529 | 1743106 |
| chr7 | 1749144 | 1750353 |
| chr7 | 2067920 | 2069256 |
| chr7 | 2561227 | 2562117 |
| chr7 | 2562485 | 2564965 |
| chr7 | 2728397 | 2729602 |
| chr7 | 2796707 | 2798062 |
| chr7 | 2842333 | 2843354 |
| chr7 | 2915853 | 2916803 |
| chr7 | 2966148 | 2966601 |
| chr7 | 5104067 | 5104269 |
| chr7 | 5458017 | 5458884 |
| chr7 | 5534132 | 5534864 |
| chr7 | 5594918 | 5596373 |
| chr7 | 6035408 | 6035754 |

|      |          |          |
|------|----------|----------|
| chr7 | 6661008  | 6661213  |
| chr7 | 7605456  | 7606229  |
| chr7 | 7605725  | 7606277  |
| chr7 | 7679942  | 7680067  |
| chr7 | 7679945  | 7680167  |
| chr7 | 7680668  | 7680842  |
| chr7 | 16844472 | 16844572 |
| chr7 | 16950455 | 16950773 |
| chr7 | 17309842 | 17310343 |
| chr7 | 17714285 | 17714821 |
| chr7 | 18120873 | 18122018 |
| chr7 | 19642427 | 19643000 |
| chr7 | 22685897 | 22686265 |
| chr7 | 27779389 | 27779523 |
| chr7 | 29522629 | 29523518 |
| chr7 | 30234830 | 30237385 |
| chr7 | 30757100 | 30758660 |
| chr7 | 32099731 | 32100780 |
| chr7 | 32287307 | 32288171 |
| chr7 | 32318101 | 32318596 |
| chr7 | 32345271 | 32345503 |
| chr7 | 32400039 | 32400991 |
| chr7 | 32529602 | 32529871 |
| chr7 | 32835676 | 32836482 |
| chr7 | 32949222 | 32950106 |
| chr7 | 32997389 | 32998231 |
| chr7 | 33114916 | 33115989 |
| chr7 | 33146831 | 33150547 |
| chr7 | 33169037 | 33169380 |
| chr7 | 33708594 | 33709410 |
| chr7 | 33726955 | 33728021 |
| chr7 | 33732317 | 33733893 |
| chr7 | 33737830 | 33742139 |
| chr7 | 33761601 | 33762911 |
| chr7 | 33844059 | 33845064 |
| chr7 | 33870823 | 33873142 |
| chr7 | 33875894 | 33877226 |
| chr7 | 33893772 | 33894751 |
| chr7 | 33905091 | 33906629 |
| chr7 | 33920995 | 33921826 |
| chr7 | 33934509 | 33935920 |
| chr7 | 33979373 | 33980370 |
| chr7 | 33987751 | 33989523 |

|      |          |          |
|------|----------|----------|
| chr7 | 34000322 | 34002023 |
| chr7 | 34007266 | 34008497 |
| chr7 | 34019651 | 34020610 |
| chr7 | 34021900 | 34023600 |
| chr7 | 34025707 | 34027580 |
| chr7 | 33880935 | 33882355 |
| chr7 | 34021900 | 34021947 |
| chr7 | 34037232 | 34038523 |
| chr7 | 34062293 | 34062486 |
| chr7 | 34073849 | 34074509 |
| chr7 | 34087489 | 34089876 |
| chr7 | 34090278 | 34092886 |
| chr7 | 34096822 | 34099513 |
| chr7 | 34100025 | 34101718 |
| chr7 | 34102111 | 34102600 |
| chr7 | 34097083 | 34097303 |
| chr7 | 34097660 | 34097760 |
| chr7 | 34097781 | 34097881 |
| chr7 | 34103048 | 34103071 |
| chr7 | 34103656 | 34104974 |
| chr7 | 34106524 | 34111779 |
| chr7 | 34124666 | 34126392 |
| chr7 | 34132474 | 34133688 |
| chr7 | 34141872 | 34143514 |
| chr7 | 34165670 | 34166688 |
| chr7 | 34169354 | 34170746 |
| chr7 | 34174640 | 34175468 |
| chr7 | 34180274 | 34181151 |
| chr7 | 34181449 | 34182915 |
| chr7 | 34194800 | 34195664 |
| chr7 | 34203055 | 34203956 |
| chr7 | 34205589 | 34206456 |
| chr7 | 34163389 | 34165206 |
| chr7 | 34230423 | 34230441 |
| chr7 | 34231316 | 34231698 |
| chr7 | 34275403 | 34276652 |
| chr7 | 34351293 | 34352242 |
| chr7 | 34360092 | 34361479 |
| chr7 | 34360417 | 34360662 |
| chr7 | 34378207 | 34379284 |
| chr7 | 34413922 | 34414533 |
| chr7 | 34524161 | 34525054 |
| chr7 | 34526871 | 34528636 |

|      |          |          |
|------|----------|----------|
| chr7 | 34603170 | 34603704 |
| chr7 | 34626751 | 34627359 |
| chr7 | 34749008 | 34750141 |
| chr7 | 34925760 | 34926847 |
| chr7 | 34935842 | 34937165 |
| chr7 | 35071959 | 35073666 |
| chr7 | 36187845 | 36188763 |
| chr7 | 39753425 | 39755294 |
| chr7 | 41904764 | 41906001 |
| chr7 | 42565164 | 42565943 |
| chr7 | 42861148 | 42862189 |
| chr7 | 42999678 | 42999934 |
| chr7 | 43330518 | 43331497 |
| chr7 | 43768920 | 43769478 |
| chr7 | 44822822 | 44823660 |
| chr7 | 45327347 | 45329752 |
| chr7 | 45364360 | 45364494 |
| chr7 | 45387312 | 45388359 |
| chr7 | 45439719 | 45440693 |
| chr7 | 45442543 | 45444002 |
| chr7 | 45543606 | 45545150 |
| chr7 | 45547210 | 45549000 |
| chr7 | 45598790 | 45599838 |
| chr7 | 45655121 | 45656424 |
| chr7 | 46500542 | 46501632 |
| chr7 | 46504425 | 46511731 |
| chr7 | 46808266 | 46809847 |
| chr7 | 47635584 | 47637985 |
| chr7 | 47708564 | 47709361 |
| chr7 | 50650645 | 50651916 |
| chr7 | 51331016 | 51331848 |
| chr7 | 57547262 | 57548687 |
| chr7 | 57554693 | 57555868 |
| chr7 | 58008566 | 58008762 |
| chr7 | 61054268 | 61055217 |
| chr7 | 61054274 | 61055217 |
| chr7 | 61054283 | 61055217 |
| chr7 | 61078928 | 61079829 |
| chr7 | 61080938 | 61081175 |
| chr7 | 61081853 | 61082033 |
| chr7 | 61085042 | 61085415 |
| chr7 | 61536541 | 61537965 |
| chr7 | 61539828 | 61541896 |

|      |          |          |
|------|----------|----------|
| chr7 | 61542507 | 61550653 |
| chr7 | 61551496 | 61553467 |
| chr7 | 61542507 | 61542700 |
| chr7 | 61543330 | 61543569 |
| chr7 | 61557478 | 61558968 |
| chr7 | 61744122 | 61745067 |
| chr7 | 61746366 | 61747652 |
| chr7 | 61789067 | 61790346 |
| chr7 | 61791048 | 61792548 |
| chr7 | 61793926 | 61795237 |
| chr7 | 61795725 | 61799582 |
| chr7 | 61782434 | 61784937 |
| chr7 | 61879164 | 61880358 |
| chr7 | 61890091 | 61896676 |
| chr7 | 61906479 | 61906720 |
| chr7 | 61967007 | 61972389 |
| chr7 | 61967139 | 61973779 |
| chr7 | 61974872 | 61978152 |
| chr7 | 61982135 | 61986976 |
| chr7 | 61990037 | 61991441 |
| chr7 | 61997058 | 61997871 |
| chr7 | 61979155 | 61981820 |
| chr7 | 61972740 | 61972851 |
| chr7 | 61972973 | 61973754 |
| chr7 | 61974936 | 61975341 |
| chr7 | 61976067 | 61976317 |
| chr7 | 62007646 | 62007878 |
| chr7 | 62021707 | 62021943 |
| chr7 | 62075093 | 62075244 |
| chr7 | 62330413 | 62330558 |
| chr7 | 64073633 | 64074803 |
| chr7 | 64077525 | 64080932 |
| chr7 | 64101850 | 64102999 |
| chr7 | 64094148 | 64095021 |
| chr7 | 64143519 | 64146178 |
| chr7 | 64331184 | 64332932 |
| chr7 | 64333947 | 64335236 |
| chr7 | 64336152 | 64338349 |
| chr7 | 64338793 | 64344191 |
| chr7 | 64452998 | 64460289 |
| chr7 | 70264007 | 70265976 |
| chr7 | 73588191 | 73588473 |
| chr7 | 75271937 | 75272254 |

|      |           |           |
|------|-----------|-----------|
| chr7 | 75920414  | 75921713  |
| chr7 | 75931573  | 75932480  |
| chr7 | 85374617  | 85375622  |
| chr7 | 86781244  | 86781425  |
| chr7 | 86956889  | 86958031  |
| chr7 | 86957629  | 86957839  |
| chr7 | 87396553  | 87398019  |
| chr7 | 87916037  | 87916559  |
| chr7 | 88176252  | 88176362  |
| chr7 | 89841324  | 89841578  |
| chr7 | 90062361  | 90062473  |
| chr7 | 90062690  | 90062900  |
| chr7 | 90894461  | 90894741  |
| chr7 | 91017196  | 91018460  |
| chr7 | 92622468  | 92622925  |
| chr7 | 92756596  | 92757554  |
| chr7 | 92791217  | 92792071  |
| chr7 | 97735474  | 97735787  |
| chr7 | 97797532  | 97798582  |
| chr7 | 97984020  | 97984552  |
| chr7 | 98248841  | 98249864  |
| chr7 | 98248841  | 98249864  |
| chr7 | 98316633  | 98317610  |
| chr7 | 98695374  | 98697424  |
| chr7 | 99063264  | 99064007  |
| chr7 | 99213651  | 99214735  |
| chr7 | 99668006  | 99671826  |
| chr7 | 99672326  | 99673380  |
| chr7 | 99679711  | 99679913  |
| chr7 | 99697734  | 99699577  |
| chr7 | 100033423 | 100034604 |
| chr7 | 100302915 | 100303157 |
| chr7 | 100486283 | 100488286 |
| chr7 | 100549087 | 100550070 |
| chr7 | 100607215 | 100608291 |
| chr7 | 100609038 | 100611380 |
| chr7 | 100634517 | 100635182 |
| chr7 | 100675596 | 100676922 |
| chr7 | 100685653 | 100686844 |
| chr7 | 100702207 | 100703245 |
| chr7 | 100769388 | 100770538 |
| chr7 | 100805843 | 100809205 |
| chr7 | 100815506 | 100816366 |

|      |           |           |
|------|-----------|-----------|
| chr7 | 100806023 | 100809205 |
| chr7 | 100815506 | 100816366 |
| chr7 | 100887325 | 100888729 |
| chr7 | 100943715 | 100945719 |
| chr7 | 101051060 | 101054102 |
| chr7 | 101175539 | 101177630 |
| chr7 | 101206651 | 101207741 |
| chr7 | 101251584 | 101252786 |
| chr7 | 101457985 | 101458217 |
| chr7 | 101499738 | 101500280 |
| chr7 | 101513263 | 101515148 |
| chr7 | 101525913 | 101526265 |
| chr7 | 102516761 | 102517245 |
| chr7 | 103032158 | 103033180 |
| chr7 | 103968717 | 103969573 |
| chr7 | 104192666 | 104192766 |
| chr7 | 104468199 | 104468206 |
| chr7 | 104524164 | 104524509 |
| chr7 | 104561927 | 104563750 |
| chr7 | 104562552 | 104563888 |
| chr7 | 104603725 | 104605160 |
| chr7 | 104621232 | 104622468 |
| chr7 | 104653918 | 104654430 |
| chr7 | 105258731 | 105259669 |
| chr7 | 105559038 | 105559900 |
| chr7 | 105564290 | 105565600 |
| chr7 | 105581670 | 105582512 |
| chr7 | 105592589 | 105593308 |
| chr7 | 105637082 | 105638408 |
| chr7 | 105648658 | 105650563 |
| chr7 | 105681260 | 105682503 |
| chr7 | 105689771 | 105690827 |
| chr7 | 105705407 | 105707051 |
| chr7 | 105711675 | 105713531 |
| chr7 | 105753286 | 105753628 |
| chr7 | 105753287 | 105753628 |
| chr7 | 105983831 | 105983950 |
| chr7 | 106099681 | 106100863 |
| chr7 | 106149301 | 106149808 |
| chr7 | 106252765 | 106253523 |
| chr7 | 106437468 | 106437858 |
| chr7 | 106437468 | 106439096 |
| chr7 | 106452220 | 106453699 |

|      |           |           |
|------|-----------|-----------|
| chr7 | 106469545 | 106470518 |
| chr7 | 107146264 | 107147607 |
| chr7 | 107184245 | 107185414 |
| chr7 | 107300866 | 107302804 |
| chr7 | 107332040 | 107332802 |
| chr7 | 107383717 | 107383936 |
| chr7 | 107384711 | 107384765 |
| chr7 | 107589015 | 107590800 |
| chr7 | 107592253 | 107592980 |
| chr7 | 107592253 | 107592330 |
| chr7 | 107988396 | 107988610 |
| chr7 | 108094591 | 108097614 |
| chr7 | 108095260 | 108095373 |
| chr7 | 108196532 | 108198248 |
| chr7 | 108209213 | 108210823 |
| chr7 | 108218982 | 108221235 |
| chr7 | 108221611 | 108223120 |
| chr7 | 108250804 | 108251836 |
| chr7 | 108267252 | 108268571 |
| chr7 | 108209688 | 108209797 |
| chr7 | 108502914 | 108504139 |
| chr7 | 110261508 | 110262398 |
| chr7 | 111201688 | 111201816 |
| chr7 | 111202043 | 111203203 |
| chr7 | 111621986 | 111622594 |
| chr7 | 112062489 | 112063556 |
| chr7 | 112212544 | 112213540 |
| chr7 | 112430275 | 112430838 |
| chr7 | 112580044 | 112580114 |
| chr7 | 112909111 | 112909216 |
| chr7 | 112931650 | 112932353 |
| chr7 | 113725619 | 113726441 |
| chr7 | 116420659 | 116421670 |
| chr7 | 117798418 | 117798700 |
| chr7 | 121150522 | 121151725 |
| chr7 | 123571981 | 123573018 |
| chr7 | 127086516 | 127087653 |
| chr7 | 127185931 | 127187288 |
| chr7 | 127225776 | 127226622 |
| chr7 | 127247918 | 127249569 |
| chr7 | 127834187 | 127836601 |
| chr7 | 127878453 | 127880020 |
| chr7 | 127907947 | 127908970 |



|      |           |           |
|------|-----------|-----------|
| chr7 | 127877104 | 127878078 |
| chr7 | 127983513 | 127984476 |
| chr7 | 128537961 | 128538341 |
| chr7 | 128538848 | 128541068 |
| chr7 | 131310324 | 131311244 |
| chr7 | 131539048 | 131540189 |
| chr7 | 131871323 | 131872790 |
| chr7 | 131310485 | 131310631 |
| chr7 | 134250364 | 134251371 |
| chr7 | 134580995 | 134581846 |
| chr7 | 135451264 | 135452362 |
| chr7 | 135462302 | 135462714 |
| chr7 | 137516454 | 137518693 |
| chr7 | 138248649 | 138251137 |
| chr7 | 142599877 | 142601986 |
| chr7 | 142602241 | 142603746 |
| chr7 | 144532912 | 144533508 |
| chr7 | 144533312 | 144533443 |
| chr7 | 146206773 | 146207040 |
| chr7 | 148336389 | 148337518 |
| chr7 | 149225917 | 149226721 |
| chr7 | 149387741 | 149388518 |
| chr7 | 149439089 | 149439366 |
| chr7 | 150399861 | 150401234 |
| chr7 | 150577874 | 150578999 |
| chr7 | 150686548 | 150688591 |
| chr7 | 151015701 | 151018948 |
| chr7 | 151158967 | 151160404 |
| chr7 | 151276256 | 151277267 |
| chr7 | 151515927 | 151517049 |
| chr7 | 151573216 | 151574607 |
| chr7 | 151610638 | 151611866 |
| chr7 | 151735125 | 151736091 |
| chr7 | 152108585 | 152108697 |
| chr7 | 154580173 | 154581150 |
| chr7 | 154603100 | 154604477 |
| chr7 | 154702278 | 154703392 |
| chr7 | 154725734 | 154726991 |
| chr7 | 154910993 | 154912469 |
| chr7 | 154974626 | 154975432 |
| chr7 | 154976279 | 154978494 |
| chr7 | 155039916 | 155040784 |
| chr7 | 155107784 | 155109142 |

|      |           |           |
|------|-----------|-----------|
| chr7 | 155428418 | 155429370 |
| chr7 | 155440738 | 155442273 |
| chr7 | 155452975 | 155453780 |
| chr7 | 155579663 | 155580587 |
| chr7 | 155604354 | 155605071 |
| chr7 | 154861267 | 154862502 |
| chr7 | 155604354 | 155605071 |
| chr7 | 156917046 | 156917918 |
| chr7 | 157940177 | 157940464 |
| chr7 | 157940341 | 157940506 |
| chr7 | 158373652 | 158373962 |
| chr7 | 158382634 | 158383632 |
| chr7 | 158384012 | 158387555 |
| chr7 | 158498480 | 158501136 |
| chr7 | 158575376 | 158576135 |
| chr7 | 158622833 | 158623179 |
| chr7 | 158773594 | 158777451 |
| chr8 | 2208856   | 2210049   |
| chr8 | 8219999   | 8220200   |
| chr8 | 23457258  | 23458322  |
| chr8 | 43782935  | 43783053  |
| chr8 | 43785540  | 43785652  |
| chr8 | 43794504  | 43794870  |
| chr8 | 43821983  | 43822217  |
| chr8 | 46843305  | 46844175  |
| chr8 | 46844770  | 46846062  |
| chr8 | 46846585  | 46848380  |
| chr8 | 46848611  | 46849145  |
| chr8 | 46849404  | 46850541  |
| chr8 | 46850901  | 46852965  |
| chr8 | 46855834  | 46857061  |
| chr8 | 46839284  | 46842235  |
| chr8 | 46839610  | 46839844  |
| chr8 | 46840816  | 46840937  |
| chr8 | 46841565  | 46841808  |
| chr8 | 46843609  | 46843842  |
| chr8 | 46845184  | 46845553  |
| chr8 | 46847681  | 46847888  |
| chr8 | 46848716  | 46848853  |
| chr8 | 46851455  | 46851673  |
| chr8 | 46852359  | 46852615  |
| chr8 | 46852731  | 46852910  |
| chr8 | 46856388  | 46856546  |

|      |          |          |
|------|----------|----------|
| chr8 | 46868705 | 46868939 |
| chr8 | 46903101 | 46903297 |
| chr8 | 46903140 | 46903396 |
| chr8 | 47730340 | 47731274 |
| chr8 | 54090008 | 54090530 |
| chr8 | 54185035 | 54185548 |
| chr8 | 54648701 | 54650014 |
| chr8 | 56986654 | 56987810 |
| chr8 | 56987080 | 56987810 |
| chr8 | 58118136 | 58118860 |
| chr8 | 58122011 | 58123675 |
| chr8 | 67025174 | 67026735 |
| chr8 | 67092067 | 67093089 |
| chr8 | 67341035 | 67343240 |
| chr8 | 67434205 | 67435496 |
| chr8 | 67453531 | 67454663 |
| chr8 | 69572580 | 69573643 |
| chr8 | 69572767 | 69574891 |
| chr8 | 69765914 | 69766972 |
| chr8 | 77912839 | 77912898 |
| chr8 | 81279191 | 81279830 |
| chr8 | 81490171 | 81491186 |
| chr8 | 81786449 | 81787490 |
| chr8 | 81786449 | 81787490 |
| chr8 | 81786912 | 81787251 |
| chr8 | 82643992 | 82644731 |
| chr8 | 86305764 | 86307380 |
| chr8 | 86420294 | 86421727 |
| chr8 | 86420294 | 86421727 |
| chr8 | 86428243 | 86430034 |
| chr8 | 86572342 | 86572481 |
| chr8 | 86847891 | 86848546 |
| chr8 | 86852245 | 86853280 |
| chr8 | 87016531 | 87016733 |
| chr8 | 87272139 | 87272630 |
| chr8 | 87272988 | 87273549 |
| chr8 | 87333356 | 87334376 |
| chr8 | 87354102 | 87354303 |
| chr8 | 87568615 | 87568660 |
| chr8 | 87631195 | 87631405 |
| chr8 | 89338423 | 89341800 |
| chr8 | 90053490 | 90053660 |
| chr8 | 90265298 | 90266079 |

|      |          |          |
|------|----------|----------|
| chr8 | 90426499 | 90427088 |
| chr8 | 90506363 | 90506517 |
| chr8 | 90573406 | 90574219 |
| chr8 | 90660922 | 90661262 |
| chr8 | 90661495 | 90663434 |
| chr8 | 90702102 | 90702339 |
| chr8 | 90712428 | 90713695 |
| chr8 | 90771522 | 90771763 |
| chr8 | 90771595 | 90771778 |
| chr8 | 90816618 | 90817365 |
| chr8 | 90904523 | 90906410 |
| chr8 | 91001482 | 91002235 |
| chr8 | 91013114 | 91014219 |
| chr8 | 91094211 | 91095419 |
| chr8 | 91174362 | 91174914 |
| chr8 | 91190558 | 91191902 |
| chr8 | 91226565 | 91227723 |
| chr8 | 91233146 | 91234025 |
| chr8 | 91233542 | 91233973 |
| chr8 | 91296190 | 91297750 |
| chr8 | 91300888 | 91302437 |
| chr8 | 91304217 | 91305113 |
| chr8 | 91308187 | 91309281 |
| chr8 | 91312810 | 91314287 |
| chr8 | 91317680 | 91318583 |
| chr8 | 91321430 | 91323593 |
| chr8 | 91329216 | 91333386 |
| chr8 | 91336024 | 91337939 |
| chr8 | 91338373 | 91338977 |
| chr8 | 91332103 | 91333386 |
| chr8 | 91336024 | 91337939 |
| chr8 | 91338373 | 91339262 |
| chr8 | 91350913 | 91351530 |
| chr8 | 91363625 | 91363728 |
| chr8 | 91383354 | 91383995 |
| chr8 | 91433400 | 91434405 |
| chr8 | 91484842 | 91485006 |
| chr8 | 91656997 | 91657580 |
| chr8 | 91658693 | 91658977 |
| chr8 | 91659576 | 91659798 |
| chr8 | 91678357 | 91678884 |
| chr8 | 91683223 | 91683726 |
| chr8 | 91683523 | 91683747 |

|      |          |          |
|------|----------|----------|
| chr8 | 91760834 | 91761382 |
| chr8 | 91763344 | 91764179 |
| chr8 | 91774716 | 91775883 |
| chr8 | 91778865 | 91781124 |
| chr8 | 91785325 | 91787189 |
| chr8 | 91782450 | 91784144 |
| chr8 | 91779463 | 91779573 |
| chr8 | 91802539 | 91804859 |
| chr8 | 91802582 | 91802690 |
| chr8 | 91803162 | 91804732 |
| chr8 | 91870445 | 91873486 |
| chr8 | 91864729 | 91867152 |
| chr8 | 92052621 | 92053960 |
| chr8 | 93075041 | 93075184 |
| chr8 | 93076041 | 93076063 |
| chr8 | 93114769 | 93116223 |
| chr8 | 94363111 | 94365331 |
| chr8 | 94557682 | 94558592 |
| chr8 | 94610509 | 94611610 |
| chr8 | 94657289 | 94666638 |
| chr8 | 94669216 | 94670940 |
| chr8 | 94692561 | 94692582 |
| chr8 | 94692561 | 94692647 |
| chr8 | 94835735 | 94836734 |
| chr8 | 94951956 | 94952926 |
| chr8 | 94992962 | 94994005 |
| chr8 | 94994885 | 94996199 |
| chr8 | 95003890 | 95004747 |
| chr8 | 95006646 | 95007439 |
| chr8 | 95009349 | 95010887 |
| chr8 | 95031299 | 95031978 |
| chr8 | 95083768 | 95083843 |
| chr8 | 95083768 | 95084606 |
| chr8 | 95091590 | 95092517 |
| chr8 | 95167554 | 95169675 |
| chr8 | 95170752 | 95172205 |
| chr8 | 95177672 | 95178696 |
| chr8 | 95204913 | 95205407 |
| chr8 | 95954272 | 95955303 |
| chr8 | 96037243 | 96038026 |
| chr8 | 96084488 | 96085404 |
| chr8 | 96100072 | 96100284 |
| chr8 | 96116448 | 96117071 |

|      |          |          |
|------|----------|----------|
| chr8 | 96181458 | 96181881 |
| chr8 | 96202616 | 96204253 |
| chr8 | 96204756 | 96206141 |
| chr8 | 96227272 | 96228140 |
| chr8 | 96236923 | 96238674 |
| chr8 | 96281806 | 96282245 |
| chr8 | 96289228 | 96290026 |
| chr8 | 96297021 | 96297042 |
| chr8 | 96334627 | 96335984 |
| chr8 | 96365611 | 96366648 |
| chr8 | 96379640 | 96380096 |
| chr8 | 96416401 | 96417393 |
| chr8 | 96446621 | 96447516 |
| chr8 | 96861965 | 96863306 |
| chr8 | 97096397 | 97097490 |
| chr8 | 97159325 | 97160727 |
| chr8 | 97225442 | 97226321 |
| chr8 | 97274972 | 97275254 |
| chr8 | 97275052 | 97275264 |
| chr8 | 97366025 | 97366900 |
| chr8 | 97505365 | 97507135 |
| chr8 | 97573800 | 97574896 |
| chr8 | 98008263 | 98008462 |
| chr8 | 98198963 | 98201666 |
| chr8 | 98219006 | 98220498 |
| chr8 | 98233893 | 98235543 |
| chr8 | 98251255 | 98252529 |
| chr8 | 98387646 | 98387797 |
| chr8 | 98388036 | 98388199 |
| chr8 | 98388047 | 98388348 |
| chr8 | 98461972 | 98463326 |
| chr8 | 98472041 | 98472938 |
| chr8 | 98553110 | 98553676 |
| chr8 | 98566097 | 98566471 |
| chr8 | 98657358 | 98657915 |
| chr8 | 98767632 | 98767776 |
| chr8 | 98945439 | 98946859 |
| chr8 | 99057072 | 99057919 |
| chr8 | 99198906 | 99200486 |
| chr8 | 99361155 | 99363639 |
| chr8 | 99796345 | 99797148 |
| chr8 | 99854226 | 99854450 |
| chr8 | 99913933 | 99914542 |

|      |           |           |
|------|-----------|-----------|
| chr8 | 99949825  | 99951676  |
| chr8 | 99953057  | 99954335  |
| chr8 | 99955948  | 99959416  |
| chr8 | 99981952  | 99982598  |
| chr8 | 100024727 | 100025292 |
| chr8 | 100508057 | 100508247 |
| chr8 | 100905488 | 100907046 |
| chr8 | 100908364 | 100909178 |
| chr8 | 101026457 | 101026665 |
| chr8 | 101041074 | 101041625 |
| chr8 | 101118401 | 101119093 |
| chr8 | 101358120 | 101359066 |
| chr8 | 101407741 | 101408138 |
| chr8 | 101408376 | 101408597 |
| chr8 | 101422626 | 101424071 |
| chr8 | 101426090 | 101426989 |
| chr8 | 101427296 | 101432516 |
| chr8 | 101473749 | 101475674 |
| chr8 | 101479920 | 101480776 |
| chr8 | 101482953 | 101485330 |
| chr8 | 101475628 | 101475674 |
| chr8 | 101494297 | 101495905 |
| chr8 | 101499422 | 101500821 |
| chr8 | 101498069 | 101498937 |
| chr8 | 101503872 | 101504716 |
| chr8 | 101511924 | 101512728 |
| chr8 | 101518108 | 101519233 |
| chr8 | 101521353 | 101522331 |
| chr8 | 101620295 | 101621731 |
| chr8 | 101654226 | 101655161 |
| chr8 | 101661493 | 101662523 |
| chr8 | 101736532 | 101737761 |
| chr8 | 101803398 | 101804302 |
| chr8 | 101805554 | 101806625 |
| chr8 | 101813584 | 101814553 |
| chr8 | 101833365 | 101833799 |
| chr8 | 101836720 | 101837956 |
| chr8 | 101838919 | 101840138 |
| chr8 | 101871720 | 101873703 |
| chr8 | 101878371 | 101879834 |
| chr8 | 101889690 | 101890454 |
| chr8 | 101892011 | 101896259 |
| chr8 | 101871720 | 101873703 |

|      |           |           |
|------|-----------|-----------|
| chr8 | 101878371 | 101879834 |
| chr8 | 101889690 | 101890454 |
| chr8 | 101892011 | 101896259 |
| chr8 | 101912131 | 101913531 |
| chr8 | 101920316 | 101921321 |
| chr8 | 101908327 | 101909177 |
| chr8 | 101961417 | 101966827 |
| chr8 | 102020180 | 102020410 |
| chr8 | 102039512 | 102039736 |
| chr8 | 102048983 | 102049277 |
| chr8 | 102051838 | 102052936 |
| chr8 | 102056278 | 102057118 |
| chr8 | 102060563 | 102061410 |
| chr8 | 102064098 | 102064631 |
| chr8 | 102064411 | 102064633 |
| chr8 | 102074907 | 102077472 |
| chr8 | 102083021 | 102083777 |
| chr8 | 102093095 | 102094212 |
| chr8 | 102101344 | 102101960 |
| chr8 | 102105714 | 102105918 |
| chr8 | 102110746 | 102111164 |
| chr8 | 102112852 | 102113416 |
| chr8 | 102112904 | 102113729 |
| chr8 | 102127573 | 102128393 |
| chr8 | 102129272 | 102130113 |
| chr8 | 102148957 | 102150414 |
| chr8 | 102120337 | 102121714 |
| chr8 | 102137170 | 102140094 |
| chr8 | 102129790 | 102129996 |
| chr8 | 102164743 | 102168323 |
| chr8 | 102169543 | 102172139 |
| chr8 | 102181247 | 102182251 |
| chr8 | 102187668 | 102189257 |
| chr8 | 102219070 | 102219189 |
| chr8 | 102220040 | 102220075 |
| chr8 | 102245562 | 102246812 |
| chr8 | 102256284 | 102257717 |
| chr8 | 102258813 | 102259661 |
| chr8 | 102286273 | 102287011 |
| chr8 | 102295024 | 102296205 |
| chr8 | 102299450 | 102300836 |
| chr8 | 102312952 | 102315327 |
| chr8 | 102329349 | 102330826 |



|      |           |           |
|------|-----------|-----------|
| chr8 | 102335379 | 102336955 |
| chr8 | 102340994 | 102342090 |
| chr8 | 102344667 | 102346324 |
| chr8 | 102250124 | 102252937 |
| chr8 | 102301609 | 102302490 |
| chr8 | 102299499 | 102299664 |
| chr8 | 102300073 | 102300364 |
| chr8 | 102300591 | 102300717 |
| chr8 | 102373596 | 102374533 |
| chr8 | 102374818 | 102375659 |
| chr8 | 102387366 | 102388206 |
| chr8 | 102405290 | 102408158 |
| chr8 | 102410409 | 102411958 |
| chr8 | 102421281 | 102422874 |
| chr8 | 102395177 | 102404290 |
| chr8 | 102415677 | 102420678 |
| chr8 | 102407072 | 102407283 |
| chr8 | 102407145 | 102407287 |
| chr8 | 102436171 | 102437540 |
| chr8 | 102444161 | 102445164 |
| chr8 | 102449758 | 102451090 |
| chr8 | 102452560 | 102453221 |
| chr8 | 102461131 | 102466877 |
| chr8 | 102473830 | 102473931 |
| chr8 | 102504150 | 102504686 |
| chr8 | 102504196 | 102505203 |
| chr8 | 102527077 | 102527499 |
| chr8 | 102585628 | 102585866 |
| chr8 | 102615222 | 102616739 |
| chr8 | 102618543 | 102621951 |
| chr8 | 102650879 | 102651797 |
| chr8 | 102682885 | 102683091 |
| chr8 | 102712889 | 102714235 |
| chr8 | 102714856 | 102716298 |
| chr8 | 102718325 | 102721649 |
| chr8 | 102729240 | 102731493 |
| chr8 | 102738557 | 102740283 |
| chr8 | 102746968 | 102747874 |
| chr8 | 102761532 | 102763050 |
| chr8 | 102764282 | 102764334 |
| chr8 | 102764746 | 102765921 |
| chr8 | 102766497 | 102770042 |
| chr8 | 102779065 | 102780353 |

|      |           |           |
|------|-----------|-----------|
| chr8 | 102776321 | 102777260 |
| chr8 | 102787345 | 102788531 |
| chr8 | 102788693 | 102789504 |
| chr8 | 102795664 | 102796109 |
| chr8 | 102819352 | 102821240 |
| chr8 | 102826171 | 102827413 |
| chr8 | 102834885 | 102836446 |
| chr8 | 102839124 | 102839942 |
| chr8 | 102848024 | 102849560 |
| chr8 | 102853323 | 102855543 |
| chr8 | 102856870 | 102857040 |
| chr8 | 102848035 | 102848334 |
| chr8 | 102857952 | 102858114 |
| chr8 | 102861702 | 102862570 |
| chr8 | 102873311 | 102874658 |
| chr8 | 102889077 | 102891199 |
| chr8 | 102924752 | 102925493 |
| chr8 | 102924895 | 102925357 |
| chr8 | 102959660 | 102961048 |
| chr8 | 102964012 | 102965329 |
| chr8 | 102992201 | 102993736 |
| chr8 | 103024041 | 103029203 |
| chr8 | 103079526 | 103080428 |
| chr8 | 103095917 | 103096791 |
| chr8 | 103102131 | 103104426 |
| chr8 | 103105331 | 103107742 |
| chr8 | 103108074 | 103109255 |
| chr8 | 103132747 | 103134199 |
| chr8 | 103155832 | 103157096 |
| chr8 | 103191461 | 103192622 |
| chr8 | 103192976 | 103193981 |
| chr8 | 103198247 | 103199423 |
| chr8 | 103207065 | 103208012 |
| chr8 | 103208511 | 103209341 |
| chr8 | 103201516 | 103204786 |
| chr8 | 103536089 | 103536648 |
| chr8 | 103565828 | 103566732 |
| chr8 | 103562864 | 103564044 |
| chr8 | 103588131 | 103589512 |
| chr8 | 103597010 | 103598145 |
| chr8 | 103612586 | 103614073 |
| chr8 | 103616116 | 103616602 |
| chr8 | 103628319 | 103628831 |

|      |           |           |
|------|-----------|-----------|
| chr8 | 103649540 | 103651103 |
| chr8 | 103652962 | 103654313 |
| chr8 | 103658615 | 103658753 |
| chr8 | 103686521 | 103687485 |
| chr8 | 103688091 | 103690336 |
| chr8 | 103692401 | 103693344 |
| chr8 | 103704756 | 103705604 |
| chr8 | 103713595 | 103715445 |
| chr8 | 103714277 | 103714486 |
| chr8 | 103714386 | 103714490 |
| chr8 | 103725761 | 103726574 |
| chr8 | 103731267 | 103732227 |
| chr8 | 103733138 | 103734586 |
| chr8 | 103734812 | 103736866 |
| chr8 | 103745404 | 103751289 |
| chr8 | 103752221 | 103753731 |
| chr8 | 103760991 | 103762284 |
| chr8 | 103762860 | 103765774 |
| chr8 | 103767814 | 103769746 |
| chr8 | 103770825 | 103771687 |
| chr8 | 103779693 | 103781004 |
| chr8 | 103794499 | 103795360 |
| chr8 | 103796691 | 103797703 |
| chr8 | 103800207 | 103801191 |
| chr8 | 103743024 | 103744571 |
| chr8 | 103818165 | 103823985 |
| chr8 | 103874946 | 103875090 |
| chr8 | 103915553 | 103916045 |
| chr8 | 104019755 | 104020602 |
| chr8 | 104087528 | 104088684 |
| chr8 | 104125689 | 104127117 |
| chr8 | 104134085 | 104134842 |
| chr8 | 104141813 | 104142886 |
| chr8 | 104143182 | 104144033 |
| chr8 | 104147147 | 104148175 |
| chr8 | 104149831 | 104150902 |
| chr8 | 104141813 | 104141926 |
| chr8 | 104150599 | 104150821 |
| chr8 | 104186344 | 104187374 |
| chr8 | 104221797 | 104222776 |
| chr8 | 104238978 | 104240623 |
| chr8 | 104242807 | 104244332 |
| chr8 | 104383310 | 104384177 |

|      |           |           |
|------|-----------|-----------|
| chr8 | 104385121 | 104387012 |
| chr8 | 104426576 | 104427130 |
| chr8 | 104427750 | 104427960 |
| chr8 | 104510766 | 104511652 |
| chr8 | 104512211 | 104512376 |
| chr8 | 104513371 | 104514561 |
| chr8 | 104588032 | 104588592 |
| chr8 | 104662426 | 104662488 |
| chr8 | 104704288 | 104704530 |
| chr8 | 104719077 | 104720711 |
| chr8 | 104991899 | 104993400 |
| chr8 | 105259269 | 105260533 |
| chr8 | 105290777 | 105291052 |
| chr8 | 105317447 | 105317996 |
| chr8 | 105327500 | 105328687 |
| chr8 | 105343067 | 105343928 |
| chr8 | 105362019 | 105363044 |
| chr8 | 105365504 | 105366474 |
| chr8 | 105348056 | 105349483 |
| chr8 | 105406542 | 105408259 |
| chr8 | 105410179 | 105411153 |
| chr8 | 105412000 | 105413034 |
| chr8 | 105429180 | 105430626 |
| chr8 | 105442818 | 105443676 |
| chr8 | 105446166 | 105446956 |
| chr8 | 105481891 | 105483204 |
| chr8 | 105462922 | 105463955 |
| chr8 | 105482504 | 105482910 |
| chr8 | 105632846 | 105633821 |
| chr8 | 105626923 | 105629872 |
| chr8 | 105782269 | 105783662 |
| chr8 | 105784379 | 105785264 |
| chr8 | 105787403 | 105788895 |
| chr8 | 105804110 | 105804922 |
| chr8 | 105822004 | 105823000 |
| chr8 | 105836372 | 105836893 |
| chr8 | 105900592 | 105901676 |
| chr8 | 105930721 | 105930972 |
| chr8 | 105989836 | 105990677 |
| chr8 | 106198314 | 106199505 |
| chr8 | 106208208 | 106208959 |
| chr8 | 106328565 | 106329990 |
| chr8 | 106330705 | 106331806 |

|      |           |           |
|------|-----------|-----------|
| chr8 | 106328689 | 106329990 |
| chr8 | 106330705 | 106331806 |
| chr8 | 106752979 | 106754184 |
| chr8 | 107072682 | 107073071 |
| chr8 | 107255127 | 107256308 |
| chr8 | 107790086 | 107790962 |
| chr8 | 107791210 | 107791313 |
| chr8 | 107947230 | 107947468 |
| chr8 | 107950772 | 107951274 |
| chr8 | 107961781 | 107963488 |
| chr8 | 108180501 | 108180510 |
| chr8 | 108494383 | 108494722 |
| chr8 | 108684689 | 108685248 |
| chr8 | 109148346 | 109149875 |
| chr8 | 109260248 | 109261799 |
| chr8 | 109274820 | 109275331 |
| chr8 | 109596198 | 109599297 |
| chr8 | 109601121 | 109602034 |
| chr8 | 109668167 | 109669988 |
| chr8 | 109671639 | 109672907 |
| chr8 | 109674007 | 109675062 |
| chr8 | 109684867 | 109686153 |
| chr8 | 109902377 | 109902516 |
| chr8 | 109934879 | 109935718 |
| chr8 | 110605672 | 110606665 |
| chr8 | 110654629 | 110658145 |
| chr8 | 110655326 | 110655632 |
| chr8 | 110656449 | 110656762 |
| chr8 | 110702759 | 110704350 |
| chr8 | 110986081 | 110987547 |
| chr8 | 110987777 | 110988308 |
| chr8 | 111074936 | 111076620 |
| chr8 | 111667631 | 111667953 |
| chr8 | 111667731 | 111667965 |
| chr8 | 111821557 | 111821884 |
| chr8 | 112175912 | 112176406 |
| chr8 | 116791768 | 116792035 |
| chr8 | 117337004 | 117337523 |
| chr8 | 117809426 | 117810799 |
| chr8 | 117845009 | 117846403 |
| chr8 | 117849359 | 117850536 |
| chr8 | 118057433 | 118058312 |
| chr8 | 118279315 | 118280362 |

|      |           |           |
|------|-----------|-----------|
| chr8 | 119122544 | 119123733 |
| chr8 | 119170033 | 119170941 |
| chr8 | 119322232 | 119322990 |
| chr8 | 119633480 | 119634669 |
| chr8 | 119954478 | 119955401 |
| chr8 | 120221089 | 120222052 |
| chr8 | 120526196 | 120527073 |
| chr8 | 120994439 | 120995240 |
| chr8 | 121456832 | 121458032 |
| chr8 | 121609435 | 121610933 |
| chr8 | 121678962 | 121679427 |
| chr8 | 121723474 | 121724413 |
| chr8 | 121799363 | 121799627 |
| chr8 | 121822177 | 121824364 |
| chr8 | 121829438 | 121830300 |
| chr8 | 121831928 | 121833623 |
| chr8 | 121822177 | 121824364 |
| chr8 | 121832579 | 121832758 |
| chr8 | 121968527 | 121969540 |
| chr8 | 122046298 | 122048514 |
| chr8 | 122050141 | 122051304 |
| chr8 | 122097845 | 122097962 |
| chr8 | 122109564 | 122110161 |
| chr8 | 122117699 | 122117942 |
| chr8 | 122148347 | 122148551 |
| chr8 | 122176054 | 122177284 |
| chr8 | 122252520 | 122253223 |
| chr8 | 122427883 | 122428567 |
| chr8 | 122484080 | 122484109 |
| chr8 | 122557969 | 122558728 |
| chr8 | 122650760 | 122653332 |
| chr8 | 122653551 | 122655075 |
| chr8 | 122681653 | 122682196 |
| chr8 | 122737422 | 122738008 |
| chr8 | 122750437 | 122751075 |
| chr8 | 122987609 | 122988949 |
| chr8 | 122988025 | 122988527 |
| chr8 | 123092970 | 123093147 |
| chr8 | 123501004 | 123501986 |
| chr8 | 123506737 | 123507923 |
| chr8 | 123514181 | 123515716 |
| chr8 | 123519362 | 123521654 |
| chr8 | 123542176 | 123542999 |

|      |           |           |
|------|-----------|-----------|
| chr8 | 123559479 | 123560321 |
| chr8 | 123560808 | 123562297 |
| chr8 | 123562847 | 123564146 |
| chr8 | 123585664 | 123586445 |
| chr8 | 123587668 | 123588751 |
| chr8 | 123592607 | 123593948 |
| chr8 | 123613990 | 123615408 |
| chr8 | 123620385 | 123622069 |
| chr8 | 123642360 | 123643174 |
| chr8 | 123652558 | 123654786 |
| chr8 | 123658651 | 123660045 |
| chr8 | 123660714 | 123666183 |
| chr8 | 123667435 | 123668920 |
| chr8 | 123680445 | 123681619 |
| chr8 | 123685241 | 123686384 |
| chr8 | 123701284 | 123703245 |
| chr8 | 123705301 | 123708005 |
| chr8 | 123725799 | 123728252 |
| chr8 | 123733470 | 123734579 |
| chr8 | 123743774 | 123746626 |
| chr8 | 123757154 | 123758942 |
| chr8 | 123766201 | 123767701 |
| chr8 | 123772149 | 123773657 |
| chr8 | 123790990 | 123795502 |
| chr8 | 123801136 | 123802054 |
| chr8 | 123803022 | 123803998 |
| chr8 | 123695213 | 123699206 |
| chr8 | 123797381 | 123799642 |
| chr8 | 123667609 | 123667712 |
| chr8 | 123701709 | 123701946 |
| chr8 | 123896735 | 123898074 |
| chr8 | 123909958 | 123910445 |
| chr8 | 123911302 | 123911638 |
| chr8 | 123921664 | 123924720 |
| chr8 | 123941950 | 123942919 |
| chr8 | 123979759 | 123980056 |
| chr8 | 124000652 | 124001861 |
| chr8 | 124006191 | 124008339 |
| chr8 | 124009252 | 124010823 |
| chr8 | 123993472 | 123995038 |
| chr8 | 124084960 | 124085733 |
| chr8 | 124135329 | 124135887 |
| chr8 | 124169228 | 124169876 |

|      |           |           |
|------|-----------|-----------|
| chr8 | 124179296 | 124180174 |
| chr8 | 124184009 | 124186781 |
| chr8 | 124187728 | 124189303 |
| chr8 | 124200692 | 124201713 |
| chr8 | 124203880 | 124204731 |
| chr8 | 124190560 | 124195816 |
| chr8 | 124203880 | 124204766 |
| chr8 | 124321502 | 124323157 |
| chr8 | 124480724 | 124482138 |
| chr8 | 124509737 | 124510547 |
| chr8 | 124543553 | 124544785 |
| chr8 | 124552868 | 124554940 |
| chr8 | 124566127 | 124567206 |
| chr8 | 124570763 | 124572193 |
| chr8 | 124573353 | 124578189 |
| chr8 | 124578466 | 124579839 |
| chr8 | 124580043 | 124581622 |
| chr8 | 124586021 | 124586874 |
| chr8 | 124587825 | 124588978 |
| chr8 | 124591983 | 124594006 |
| chr8 | 124595557 | 124599134 |
| chr8 | 124607165 | 124609970 |
| chr8 | 124613829 | 124615246 |
| chr8 | 124624842 | 124626870 |
| chr8 | 124627388 | 124629952 |
| chr8 | 124630544 | 124632184 |
| chr8 | 124635680 | 124636910 |
| chr8 | 124639331 | 124640517 |
| chr8 | 124642125 | 124643888 |
| chr8 | 124644154 | 124645918 |
| chr8 | 124667650 | 124668833 |
| chr8 | 124669192 | 124670627 |
| chr8 | 124673684 | 124675087 |
| chr8 | 124685110 | 124686971 |
| chr8 | 124689863 | 124691312 |
| chr8 | 124700312 | 124701307 |
| chr8 | 124701922 | 124702883 |
| chr8 | 124703716 | 124704735 |
| chr8 | 124713564 | 124714494 |
| chr8 | 124716898 | 124717763 |
| chr8 | 124718570 | 124719695 |
| chr8 | 124728642 | 124730150 |
| chr8 | 124735322 | 124736926 |



|      |           |           |
|------|-----------|-----------|
| chr8 | 124740582 | 124743620 |
| chr8 | 124747849 | 124749251 |
| chr8 | 124599560 | 124601909 |
| chr8 | 124632385 | 124635271 |
| chr8 | 124677964 | 124682627 |
| chr8 | 124756063 | 124756800 |
| chr8 | 124777094 | 124777329 |
| chr8 | 124778448 | 124779718 |
| chr8 | 124835862 | 124837212 |
| chr8 | 124837587 | 124840227 |
| chr8 | 124853963 | 124855521 |
| chr8 | 124830570 | 124830920 |
| chr8 | 124845309 | 124846561 |
| chr8 | 124870065 | 124871077 |
| chr8 | 124870848 | 124870955 |
| chr8 | 124880567 | 124881463 |
| chr8 | 124882380 | 124884087 |
| chr8 | 124885557 | 124886454 |
| chr8 | 124887465 | 124889002 |
| chr8 | 124893223 | 124894339 |
| chr8 | 124898475 | 124904107 |
| chr8 | 124905172 | 124908000 |
| chr8 | 124894925 | 124898085 |
| chr8 | 124895506 | 124895677 |
| chr8 | 124905790 | 124908273 |
| chr8 | 124915206 | 124917777 |
| chr8 | 124923016 | 124924837 |
| chr8 | 124928961 | 124929898 |
| chr8 | 124933834 | 124935433 |
| chr8 | 124939919 | 124941137 |
| chr8 | 124954878 | 124956046 |
| chr8 | 124963825 | 124966722 |
| chr8 | 124968538 | 124971211 |
| chr8 | 124975108 | 124976249 |
| chr8 | 124985446 | 124986570 |
| chr8 | 124987502 | 124989579 |
| chr8 | 124991091 | 124993077 |
| chr8 | 124996579 | 124999364 |
| chr8 | 125000564 | 125002258 |
| chr8 | 125011737 | 125013217 |
| chr8 | 125018465 | 125019248 |
| chr8 | 125024501 | 125025955 |
| chr8 | 125029791 | 125030653 |

|      |           |           |
|------|-----------|-----------|
| chr8 | 125031346 | 125032200 |
| chr8 | 125033858 | 125035174 |
| chr8 | 125039673 | 125040721 |
| chr8 | 125062245 | 125064649 |
| chr8 | 125084965 | 125085942 |
| chr8 | 125095943 | 125097211 |
| chr8 | 125006666 | 125011177 |
| chr8 | 125073980 | 125075478 |
| chr8 | 125030453 | 125030653 |
| chr8 | 125100415 | 125101626 |
| chr8 | 125108450 | 125111181 |
| chr8 | 125119416 | 125120531 |
| chr8 | 125134336 | 125135447 |
| chr8 | 125135912 | 125137301 |
| chr8 | 125143706 | 125144862 |
| chr8 | 125148658 | 125151512 |
| chr8 | 125152150 | 125153756 |
| chr8 | 125163402 | 125164270 |
| chr8 | 125185161 | 125186572 |
| chr8 | 125192030 | 125193990 |
| chr8 | 125202387 | 125203305 |
| chr8 | 125211546 | 125213667 |
| chr8 | 125214332 | 125215253 |
| chr8 | 125219971 | 125222418 |
| chr8 | 125237979 | 125239059 |
| chr8 | 125240681 | 125241819 |
| chr8 | 125243447 | 125244499 |
| chr8 | 125245203 | 125246074 |
| chr8 | 125257778 | 125259612 |
| chr8 | 125263476 | 125264430 |
| chr8 | 125273431 | 125274899 |
| chr8 | 125222101 | 125222404 |
| chr8 | 125238438 | 125238669 |
| chr8 | 125240681 | 125241133 |
| chr8 | 125245347 | 125245553 |
| chr8 | 125259355 | 125259612 |
| chr8 | 125385546 | 125385748 |
| chr8 | 125388674 | 125389258 |
| chr8 | 125387072 | 125387506 |
| chr8 | 125437919 | 125440408 |
| chr8 | 125463269 | 125464568 |
| chr8 | 125486005 | 125486675 |
| chr8 | 125487755 | 125487948 |

|      |           |           |
|------|-----------|-----------|
| chr8 | 125543587 | 125543695 |
| chr8 | 125572707 | 125574707 |
| chr8 | 125576464 | 125577303 |
| chr8 | 125604863 | 125606033 |
| chr8 | 125630041 | 125630819 |
| chr8 | 125638600 | 125639882 |
| chr8 | 125640345 | 125641149 |
| chr8 | 125641456 | 125641524 |
| chr8 | 125660874 | 125662311 |
| chr8 | 125666792 | 125668711 |
| chr8 | 125670184 | 125671728 |
| chr8 | 125678083 | 125679099 |
| chr8 | 125680603 | 125682943 |
| chr8 | 125720881 | 125722097 |
| chr8 | 125733851 | 125734704 |
| chr8 | 125738669 | 125740694 |
| chr8 | 125729933 | 125731346 |
| chr8 | 125762345 | 125763213 |
| chr8 | 125766607 | 125767934 |
| chr8 | 125769263 | 125770609 |
| chr8 | 125763439 | 125764657 |
| chr8 | 125793304 | 125793578 |
| chr8 | 125794498 | 125795177 |
| chr8 | 125808702 | 125809454 |
| chr8 | 125815129 | 125815719 |
| chr8 | 125821389 | 125821620 |
| chr8 | 125841859 | 125843930 |
| chr8 | 125846489 | 125847616 |
| chr8 | 125849028 | 125849963 |
| chr8 | 125852646 | 125853618 |
| chr8 | 125854539 | 125855970 |
| chr8 | 125859406 | 125860927 |
| chr8 | 125873365 | 125877614 |
| chr8 | 125879849 | 125883007 |
| chr8 | 125885770 | 125885966 |
| chr8 | 125844249 | 125845671 |
| chr8 | 125861204 | 125872173 |
| chr8 | 125899681 | 125900175 |
| chr8 | 125900563 | 125901885 |
| chr8 | 125934250 | 125935720 |
| chr8 | 125936253 | 125937630 |
| chr8 | 125938390 | 125944029 |
| chr8 | 125949205 | 125949880 |

|      |           |           |
|------|-----------|-----------|
| chr8 | 125954305 | 125955063 |
| chr8 | 125956805 | 125957366 |
| chr8 | 125957199 | 125957315 |
| chr8 | 125966330 | 125966901 |
| chr8 | 125972515 | 125975320 |
| chr8 | 125975815 | 125977545 |
| chr8 | 125988930 | 125989490 |
| chr8 | 126001690 | 126002036 |
| chr8 | 126101393 | 126102200 |
| chr8 | 126102961 | 126105940 |
| chr8 | 126111208 | 126112462 |
| chr8 | 126186565 | 126187454 |
| chr8 | 126188958 | 126190524 |
| chr8 | 126294931 | 126295031 |
| chr8 | 126357469 | 126358343 |
| chr8 | 126360051 | 126361908 |
| chr8 | 126374822 | 126375209 |
| chr8 | 126398730 | 126399070 |
| chr8 | 126401355 | 126401457 |
| chr8 | 126422818 | 126423032 |
| chr8 | 126424310 | 126424524 |
| chr8 | 126425002 | 126425111 |
| chr8 | 126436375 | 126437341 |
| chr8 | 126438033 | 126440052 |
| chr8 | 126440840 | 126444745 |
| chr8 | 126445404 | 126446258 |
| chr8 | 126446597 | 126447431 |
| chr8 | 126448537 | 126449391 |
| chr8 | 126450013 | 126451025 |
| chr8 | 126453638 | 126455176 |
| chr8 | 126455542 | 126456640 |
| chr8 | 126456907 | 126458762 |
| chr8 | 126460158 | 126461037 |
| chr8 | 126463587 | 126466271 |
| chr8 | 126475803 | 126476985 |
| chr8 | 126477187 | 126478432 |
| chr8 | 126481166 | 126483288 |
| chr8 | 126487197 | 126490095 |
| chr8 | 126490740 | 126491436 |
| chr8 | 126493082 | 126494050 |
| chr8 | 126496659 | 126498282 |
| chr8 | 126501552 | 126504716 |
| chr8 | 126509231 | 126510268 |

|      |           |           |
|------|-----------|-----------|
| chr8 | 126513797 | 126515198 |
| chr8 | 126521237 | 126522411 |
| chr8 | 126523009 | 126524296 |
| chr8 | 126524612 | 126526112 |
| chr8 | 126526634 | 126527779 |
| chr8 | 126529117 | 126530786 |
| chr8 | 126535617 | 126536431 |
| chr8 | 126537392 | 126545441 |
| chr8 | 126546038 | 126547131 |
| chr8 | 126552959 | 126560342 |
| chr8 | 126560598 | 126561551 |
| chr8 | 126567081 | 126569831 |
| chr8 | 126573837 | 126574608 |
| chr8 | 126580864 | 126582454 |
| chr8 | 126590153 | 126591018 |
| chr8 | 126591444 | 126595011 |
| chr8 | 126601884 | 126603281 |
| chr8 | 126604030 | 126604968 |
| chr8 | 126605605 | 126607161 |
| chr8 | 126611129 | 126611985 |
| chr8 | 126614678 | 126615497 |
| chr8 | 126615992 | 126617263 |
| chr8 | 126618558 | 126620065 |
| chr8 | 126622086 | 126624755 |
| chr8 | 126629171 | 126630088 |
| chr8 | 126635524 | 126637573 |
| chr8 | 126638100 | 126639018 |
| chr8 | 126639405 | 126640140 |
| chr8 | 126642275 | 126644274 |
| chr8 | 126645492 | 126646752 |
| chr8 | 126655314 | 126657681 |
| chr8 | 126658107 | 126659385 |
| chr8 | 126659713 | 126661944 |
| chr8 | 126662390 | 126663891 |
| chr8 | 126669740 | 126671095 |
| chr8 | 126671923 | 126672807 |
| chr8 | 126676483 | 126677540 |
| chr8 | 126681789 | 126682502 |
| chr8 | 126467263 | 126472706 |
| chr8 | 126499889 | 126500958 |
| chr8 | 126532604 | 126533881 |
| chr8 | 126565195 | 126566559 |
| chr8 | 126679367 | 126681418 |

|      |           |           |
|------|-----------|-----------|
| chr8 | 126455729 | 126455894 |
| chr8 | 126464511 | 126464641 |
| chr8 | 126468572 | 126468829 |
| chr8 | 126472088 | 126472291 |
| chr8 | 126691296 | 126692480 |
| chr8 | 126699180 | 126700452 |
| chr8 | 126704606 | 126705719 |
| chr8 | 126708471 | 126710268 |
| chr8 | 126711712 | 126713732 |
| chr8 | 126716839 | 126719161 |
| chr8 | 126719444 | 126724616 |
| chr8 | 126717611 | 126717821 |
| chr8 | 126717711 | 126717833 |
| chr8 | 126718902 | 126719122 |
| chr8 | 126720486 | 126720944 |
| chr8 | 126726739 | 126727294 |
| chr8 | 126731440 | 126733905 |
| chr8 | 126740317 | 126742820 |
| chr8 | 126743723 | 126744929 |
| chr8 | 126745991 | 126750875 |
| chr8 | 126755705 | 126755905 |
| chr8 | 126756335 | 126756483 |
| chr8 | 126759077 | 126759177 |
| chr8 | 126770585 | 126771143 |
| chr8 | 126770600 | 126771356 |
| chr8 | 126772565 | 126773002 |
| chr8 | 126781266 | 126782106 |
| chr8 | 126789158 | 126789356 |
| chr8 | 126796965 | 126797767 |
| chr8 | 126798944 | 126800426 |
| chr8 | 126807331 | 126812033 |
| chr8 | 126814766 | 126815664 |
| chr8 | 126817114 | 126818857 |
| chr8 | 126836244 | 126837731 |
| chr8 | 126840102 | 126841127 |
| chr8 | 126847515 | 126849007 |
| chr8 | 126849895 | 126850699 |
| chr8 | 126856924 | 126858085 |
| chr8 | 126828214 | 126829526 |
| chr8 | 126865286 | 126866204 |
| chr8 | 126875098 | 126877320 |
| chr8 | 126880633 | 126882297 |
| chr8 | 126887367 | 126888328 |

|      |           |           |
|------|-----------|-----------|
| chr8 | 126891937 | 126892776 |
| chr8 | 126865903 | 126866204 |
| chr8 | 126909051 | 126909522 |
| chr8 | 126930001 | 126930922 |
| chr8 | 126946022 | 126947078 |
| chr8 | 126957971 | 126958516 |
| chr8 | 126969763 | 126970664 |
| chr8 | 126984195 | 126985041 |
| chr8 | 126986175 | 126988269 |
| chr8 | 126984704 | 126985041 |
| chr8 | 126986175 | 126986189 |
| chr8 | 127073931 | 127074544 |
| chr8 | 127081274 | 127081657 |
| chr8 | 127092932 | 127093621 |
| chr8 | 127095449 | 127096781 |
| chr8 | 127104494 | 127106243 |
| chr8 | 127108051 | 127109658 |
| chr8 | 127110445 | 127111487 |
| chr8 | 127114833 | 127115795 |
| chr8 | 127116407 | 127117359 |
| chr8 | 127124858 | 127125561 |
| chr8 | 127127011 | 127127830 |
| chr8 | 127141400 | 127142524 |
| chr8 | 127146379 | 127146953 |
| chr8 | 127171644 | 127172217 |
| chr8 | 127256379 | 127256605 |
| chr8 | 127312527 | 127313238 |
| chr8 | 127334753 | 127336161 |
| chr8 | 127343343 | 127344628 |
| chr8 | 127376086 | 127377532 |
| chr8 | 127379446 | 127380344 |
| chr8 | 127381196 | 127382596 |
| chr8 | 127389290 | 127390324 |
| chr8 | 127391220 | 127392239 |
| chr8 | 127393770 | 127397291 |
| chr8 | 127384629 | 127388452 |
| chr8 | 127420487 | 127421314 |
| chr8 | 127502253 | 127503077 |
| chr8 | 127504727 | 127505196 |
| chr8 | 127509499 | 127509882 |
| chr8 | 127511561 | 127512226 |
| chr8 | 127522511 | 127523352 |
| chr8 | 127529037 | 127530364 |

|      |           |           |
|------|-----------|-----------|
| chr8 | 127544879 | 127545173 |
| chr8 | 127546529 | 127547459 |
| chr8 | 127565983 | 127571740 |
| chr8 | 127574708 | 127575803 |
| chr8 | 127576145 | 127577921 |
| chr8 | 127582219 | 127588966 |
| chr8 | 127589940 | 127592348 |
| chr8 | 127594474 | 127597800 |
| chr8 | 127600575 | 127601967 |
| chr8 | 127629145 | 127632537 |
| chr8 | 127640135 | 127640604 |
| chr8 | 127661751 | 127663336 |
| chr8 | 127667573 | 127670301 |
| chr8 | 127704298 | 127705047 |
| chr8 | 127707428 | 127708685 |
| chr8 | 127719395 | 127720328 |
| chr8 | 127754989 | 127755169 |
| chr8 | 127755863 | 127757844 |
| chr8 | 127776327 | 127776530 |
| chr8 | 127963516 | 127964487 |
| chr8 | 128162562 | 128162795 |
| chr8 | 128174115 | 128175918 |
| chr8 | 128170893 | 128172472 |
| chr8 | 128217524 | 128218981 |
| chr8 | 128219399 | 128220370 |
| chr8 | 128225215 | 128229611 |
| chr8 | 128230775 | 128232342 |
| chr8 | 128232555 | 128234119 |
| chr8 | 128234531 | 128235856 |
| chr8 | 128239744 | 128241222 |
| chr8 | 128245364 | 128245575 |
| chr8 | 128220597 | 128222070 |
| chr8 | 128236238 | 128238089 |
| chr8 | 128245364 | 128246343 |
| chr8 | 128257734 | 128259803 |
| chr8 | 128262681 | 128263699 |
| chr8 | 128265365 | 128266698 |
| chr8 | 128269027 | 128269771 |
| chr8 | 128271075 | 128272345 |
| chr8 | 128273987 | 128274068 |
| chr8 | 128253256 | 128255428 |
| chr8 | 128281866 | 128284864 |
| chr8 | 128299713 | 128300096 |



|      |           |           |
|------|-----------|-----------|
| chr8 | 128300976 | 128301890 |
| chr8 | 128304864 | 128308411 |
| chr8 | 128311974 | 128313466 |
| chr8 | 128315052 | 128320190 |
| chr8 | 128347428 | 128348801 |
| chr8 | 128349400 | 128350111 |
| chr8 | 128375715 | 128377786 |
| chr8 | 128383241 | 128383914 |
| chr8 | 128394436 | 128396601 |
| chr8 | 128402128 | 128404213 |
| chr8 | 128405697 | 128406748 |
| chr8 | 128407938 | 128409302 |
| chr8 | 128409901 | 128411835 |
| chr8 | 128412360 | 128414222 |
| chr8 | 128414905 | 128416488 |
| chr8 | 128418536 | 128420308 |
| chr8 | 128423233 | 128425619 |
| chr8 | 128425936 | 128426518 |
| chr8 | 128399139 | 128401891 |
| chr8 | 128437600 | 128439325 |
| chr8 | 128500100 | 128501070 |
| chr8 | 128501297 | 128502365 |
| chr8 | 128507666 | 128513039 |
| chr8 | 128524456 | 128527343 |
| chr8 | 128531028 | 128531410 |
| chr8 | 128550842 | 128551869 |
| chr8 | 128555431 | 128557212 |
| chr8 | 128557784 | 128560218 |
| chr8 | 128561319 | 128563426 |
| chr8 | 128563836 | 128567697 |
| chr8 | 128572713 | 128574085 |
| chr8 | 128569428 | 128571176 |
| chr8 | 128577355 | 128580185 |
| chr8 | 128581597 | 128583104 |
| chr8 | 128586448 | 128587563 |
| chr8 | 128589411 | 128590780 |
| chr8 | 128592266 | 128592457 |
| chr8 | 128592266 | 128592757 |
| chr8 | 128599111 | 128599148 |
| chr8 | 128601997 | 128602879 |
| chr8 | 128604719 | 128606007 |
| chr8 | 128619032 | 128619544 |
| chr8 | 128626974 | 128627875 |

|      |           |           |
|------|-----------|-----------|
| chr8 | 128634055 | 128635316 |
| chr8 | 128638053 | 128641161 |
| chr8 | 128641378 | 128642519 |
| chr8 | 128648509 | 128649938 |
| chr8 | 128651430 | 128654298 |
| chr8 | 128657100 | 128658834 |
| chr8 | 128664838 | 128667197 |
| chr8 | 128664838 | 128667206 |
| chr8 | 128672445 | 128675242 |
| chr8 | 128684044 | 128685304 |
| chr8 | 128687037 | 128689213 |
| chr8 | 128689704 | 128690513 |
| chr8 | 128694778 | 128695930 |
| chr8 | 128700213 | 128701610 |
| chr8 | 128705532 | 128707555 |
| chr8 | 128708342 | 128709638 |
| chr8 | 128713720 | 128714911 |
| chr8 | 128676789 | 128683572 |
| chr8 | 128710720 | 128712815 |
| chr8 | 128754847 | 128756073 |
| chr8 | 128748353 | 128753329 |
| chr8 | 128762941 | 128763843 |
| chr8 | 128772151 | 128773294 |
| chr8 | 128772151 | 128773549 |
| chr8 | 128806194 | 128806449 |
| chr8 | 128821707 | 128824148 |
| chr8 | 128831805 | 128832354 |
| chr8 | 128839508 | 128840894 |
| chr8 | 128844921 | 128845986 |
| chr8 | 128847563 | 128849260 |
| chr8 | 128843413 | 128844478 |
| chr8 | 128844209 | 128844419 |
| chr8 | 128852352 | 128853202 |
| chr8 | 128864034 | 128864180 |
| chr8 | 128864274 | 128864389 |
| chr8 | 128866369 | 128868228 |
| chr8 | 128871546 | 128873150 |
| chr8 | 128881656 | 128884245 |
| chr8 | 128884613 | 128886817 |
| chr8 | 128888253 | 128889829 |
| chr8 | 128891549 | 128892590 |
| chr8 | 128875493 | 128880135 |
| chr8 | 128897325 | 128897819 |

|      |           |           |
|------|-----------|-----------|
| chr8 | 128900289 | 128901396 |
| chr8 | 128901730 | 128905152 |
| chr8 | 128906078 | 128906891 |
| chr8 | 128910597 | 128912085 |
| chr8 | 128912607 | 128913495 |
| chr8 | 128914274 | 128918947 |
| chr8 | 128921068 | 128922586 |
| chr8 | 128923144 | 128925221 |
| chr8 | 128931604 | 128933620 |
| chr8 | 128934539 | 128936374 |
| chr8 | 128937146 | 128938763 |
| chr8 | 128940447 | 128941256 |
| chr8 | 128942082 | 128943111 |
| chr8 | 128954199 | 128954749 |
| chr8 | 128957766 | 128958632 |
| chr8 | 128960864 | 128962098 |
| chr8 | 128970555 | 128971319 |
| chr8 | 128971721 | 128974301 |
| chr8 | 128981555 | 128982683 |
| chr8 | 128983055 | 128984701 |
| chr8 | 128984962 | 128985803 |
| chr8 | 128997929 | 128999200 |
| chr8 | 128999815 | 129003414 |
| chr8 | 129004155 | 129005329 |
| chr8 | 129011928 | 129012976 |
| chr8 | 129014096 | 129015119 |
| chr8 | 129029219 | 129030202 |
| chr8 | 129031139 | 129032027 |
| chr8 | 129035378 | 129039789 |
| chr8 | 129044468 | 129047979 |
| chr8 | 129048605 | 129050241 |
| chr8 | 129051572 | 129052797 |
| chr8 | 129058663 | 129059475 |
| chr8 | 129059917 | 129061129 |
| chr8 | 129061951 | 129063728 |
| chr8 | 129064745 | 129066143 |
| chr8 | 129066475 | 129070064 |
| chr8 | 129070462 | 129071905 |
| chr8 | 129079989 | 129080873 |
| chr8 | 129084115 | 129085217 |
| chr8 | 129092600 | 129094227 |
| chr8 | 129094739 | 129099031 |
| chr8 | 129100381 | 129102080 |

|      |           |           |
|------|-----------|-----------|
| chr8 | 129102511 | 129103659 |
| chr8 | 129109509 | 129110459 |
| chr8 | 129110848 | 129112270 |
| chr8 | 129113195 | 129114133 |
| chr8 | 129115857 | 129117896 |
| chr8 | 129128792 | 129130055 |
| chr8 | 129132069 | 129134712 |
| chr8 | 129137390 | 129138182 |
| chr8 | 129144460 | 129144822 |
| chr8 | 129023023 | 129024797 |
| chr8 | 129088503 | 129090401 |
| chr8 | 129120531 | 129125944 |
| chr8 | 129138456 | 129143453 |
| chr8 | 129036103 | 129036312 |
| chr8 | 129066631 | 129066767 |
| chr8 | 129069911 | 129070064 |
| chr8 | 129148584 | 129150397 |
| chr8 | 129168941 | 129170164 |
| chr8 | 129170568 | 129171453 |
| chr8 | 129172236 | 129173695 |
| chr8 | 129174566 | 129176453 |
| chr8 | 129176812 | 129178390 |
| chr8 | 129178757 | 129185706 |
| chr8 | 129193700 | 129195372 |
| chr8 | 129196510 | 129198878 |
| chr8 | 129208621 | 129216218 |
| chr8 | 129218127 | 129219760 |
| chr8 | 129150936 | 129168249 |
| chr8 | 129187345 | 129193326 |
| chr8 | 129199625 | 129207227 |
| chr8 | 129190990 | 129191098 |
| chr8 | 129232806 | 129232906 |
| chr8 | 129236792 | 129237479 |
| chr8 | 129246597 | 129246711 |
| chr8 | 129246614 | 129246908 |
| chr8 | 129262298 | 129267279 |
| chr8 | 129259266 | 129259952 |
| chr8 | 129269671 | 129269707 |
| chr8 | 129281202 | 129286078 |
| chr8 | 129288230 | 129289762 |
| chr8 | 129305081 | 129306458 |
| chr8 | 129307649 | 129309992 |
| chr8 | 129305240 | 129305463 |

|      |           |           |
|------|-----------|-----------|
| chr8 | 129314579 | 129317028 |
| chr8 | 129319017 | 129319855 |
| chr8 | 129320572 | 129322691 |
| chr8 | 129323616 | 129328293 |
| chr8 | 129341469 | 129343756 |
| chr8 | 129344674 | 129349010 |
| chr8 | 129352339 | 129354246 |
| chr8 | 129354794 | 129356096 |
| chr8 | 129328962 | 129340777 |
| chr8 | 129364332 | 129367474 |
| chr8 | 129367904 | 129369330 |
| chr8 | 129384877 | 129386324 |
| chr8 | 129384366 | 129384468 |
| chr8 | 129394669 | 129395834 |
| chr8 | 129396831 | 129400158 |
| chr8 | 129401124 | 129403886 |
| chr8 | 129404107 | 129404897 |
| chr8 | 129405428 | 129409774 |
| chr8 | 129399540 | 129399640 |
| chr8 | 129409193 | 129409398 |
| chr8 | 129416786 | 129418770 |
| chr8 | 129440130 | 129441213 |
| chr8 | 129448124 | 129448237 |
| chr8 | 129448128 | 129448382 |
| chr8 | 129487353 | 129488261 |
| chr8 | 129493845 | 129494752 |
| chr8 | 129500614 | 129502266 |
| chr8 | 129480740 | 129485144 |
| chr8 | 129536595 | 129537019 |
| chr8 | 129547538 | 129548548 |
| chr8 | 129567255 | 129567485 |
| chr8 | 129577016 | 129577217 |
| chr8 | 129707439 | 129708143 |
| chr8 | 129843250 | 129844066 |
| chr8 | 129843423 | 129843773 |
| chr8 | 130778938 | 130779438 |
| chr8 | 130808082 | 130808848 |
| chr8 | 130810298 | 130811576 |
| chr8 | 134162542 | 134163452 |
| chr8 | 134309245 | 134310199 |
| chr8 | 134315721 | 134316735 |
| chr8 | 134379281 | 134380158 |
| chr8 | 134536342 | 134537053 |

|      |           |           |
|------|-----------|-----------|
| chr8 | 134736950 | 134738012 |
| chr8 | 134748169 | 134749006 |
| chr8 | 134911422 | 134912528 |
| chr8 | 135754389 | 135755283 |
| chr8 | 135755694 | 135756505 |
| chr8 | 135724355 | 135725564 |
| chr8 | 135859123 | 135860836 |
| chr8 | 139969032 | 139969893 |
| chr8 | 140112620 | 140113495 |
| chr8 | 140556789 | 140558932 |
| chr8 | 140559471 | 140559668 |
| chr8 | 140703546 | 140704367 |
| chr8 | 141326244 | 141327260 |
| chr8 | 142036339 | 142037615 |
| chr8 | 142067499 | 142068807 |
| chr8 | 142085308 | 142085761 |
| chr8 | 143391219 | 143392691 |
| chr8 | 143409247 | 143410678 |
| chr8 | 143502417 | 143503805 |
| chr8 | 143578076 | 143579179 |
| chr8 | 143724865 | 143726676 |
| chr8 | 143733592 | 143736651 |
| chr8 | 143757426 | 143758075 |
| chr8 | 143758510 | 143759488 |
| chr8 | 143753099 | 143754546 |
| chr8 | 143807422 | 143810372 |
| chr8 | 143896834 | 143898268 |
| chr8 | 143883735 | 143884642 |
| chr8 | 144053708 | 144055745 |
| chr8 | 144069351 | 144070177 |
| chr8 | 144179847 | 144180906 |
| chr8 | 144182667 | 144184087 |
| chr8 | 144198173 | 144199519 |
| chr8 | 144224153 | 144225146 |
| chr8 | 144229102 | 144229907 |
| chr8 | 144232943 | 144234594 |
| chr8 | 144237632 | 144239019 |
| chr8 | 144249927 | 144251405 |
| chr8 | 144266440 | 144267292 |
| chr8 | 144450513 | 144451263 |
| chr8 | 144463810 | 144465335 |
| chr8 | 144489412 | 144490229 |
| chr8 | 144493430 | 144494245 |

|      |           |           |
|------|-----------|-----------|
| chr8 | 144495986 | 144498181 |
| chr8 | 144679964 | 144680957 |
| chr8 | 144731813 | 144734186 |
| chr8 | 144751714 | 144751886 |
| chr8 | 144786207 | 144787376 |
| chr8 | 144788545 | 144792293 |
| chr8 | 144789928 | 144792293 |
| chr8 | 144821014 | 144823122 |
| chr8 | 144852718 | 144852978 |
| chr8 | 144928309 | 144929240 |
| chr8 | 144930244 | 144931340 |
| chr8 | 144939986 | 144941489 |
| chr8 | 145010203 | 145011389 |
| chr8 | 145016571 | 145018143 |
| chr8 | 145030513 | 145031390 |
| chr8 | 145048570 | 145049715 |
| chr8 | 145132739 | 145134025 |
| chr8 | 145158149 | 145158246 |
| chr8 | 145158149 | 145158251 |
| chr8 | 145180657 | 145180909 |
| chr8 | 145577718 | 145579125 |
| chr8 | 145580547 | 145581695 |
| chr8 | 145581008 | 145581214 |
| chr8 | 145634056 | 145634128 |
| chr8 | 145703286 | 145704444 |
| chr8 | 145703909 | 145704010 |
| chr8 | 145733800 | 145734934 |
| chr8 | 145740247 | 145741276 |
| chr8 | 145899215 | 145900277 |
| chr8 | 145925298 | 145925491 |
| chr8 | 146017112 | 146017357 |
| chr8 | 146053764 | 146055760 |
| chr8 | 146082781 | 146084014 |
| chr8 | 146061840 | 146076238 |
| chr8 | 146076982 | 146082187 |
| chr8 | 146127929 | 146127940 |
| chr8 | 146153260 | 146161734 |
| chr8 | 146197498 | 146197759 |
| chr8 | 146231057 | 146231564 |
| chr8 | 146252063 | 146252328 |
| chr9 | 684824    | 686173    |
| chr9 | 706425    | 707440    |
| chr9 | 1049704   | 1050818   |

|      |          |          |
|------|----------|----------|
| chr9 | 2591809  | 2592881  |
| chr9 | 4197482  | 4197777  |
| chr9 | 5230194  | 5231150  |
| chr9 | 5231418  | 5231435  |
| chr9 | 5846054  | 5847227  |
| chr9 | 12958543 | 12958980 |
| chr9 | 35141615 | 35143196 |
| chr9 | 37800274 | 37801424 |
| chr9 | 38170427 | 38171523 |
| chr9 | 38384557 | 38385458 |
| chr9 | 66482087 | 66482253 |
| chr9 | 66822461 | 66822567 |
| chr9 | 66822987 | 66824662 |
| chr9 | 66832615 | 66836332 |
| chr9 | 66832615 | 66836158 |
| chr9 | 68412299 | 68422764 |
| chr9 | 68423739 | 68426354 |
| chr9 | 68999344 | 69000849 |
| chr9 | 71644458 | 71645043 |
| chr9 | 71927325 | 71929059 |
| chr9 | 72548502 | 72549258 |
| chr9 | 75151407 | 75152777 |
| chr9 | 79058883 | 79059832 |
| chr9 | 84301248 | 84302669 |
| chr9 | 85676432 | 85678698 |
| chr9 | 86808605 | 86809540 |
| chr9 | 87283107 | 87284247 |
| chr9 | 88807915 | 88808962 |
| chr9 | 88968604 | 88969269 |
| chr9 | 90381644 | 90382503 |
| chr9 | 91144725 | 91145700 |
| chr9 | 91228746 | 91229808 |
| chr9 | 91533512 | 91534318 |
| chr9 | 91794677 | 91795743 |
| chr9 | 91932950 | 91934188 |
| chr9 | 92220991 | 92222140 |
| chr9 | 91749004 | 91750663 |
| chr9 | 91794677 | 91795743 |
| chr9 | 93023177 | 93024893 |
| chr9 | 93529586 | 93530723 |
| chr9 | 93563807 | 93564771 |
| chr9 | 93955573 | 93956851 |
| chr9 | 94185913 | 94187218 |



|      |           |           |
|------|-----------|-----------|
| chr9 | 94526735  | 94527727  |
| chr9 | 94692969  | 94693077  |
| chr9 | 95427982  | 95428839  |
| chr9 | 95753688  | 95755068  |
| chr9 | 95745534  | 95751355  |
| chr9 | 96074807  | 96075973  |
| chr9 | 96346449  | 96347881  |
| chr9 | 96637019  | 96638347  |
| chr9 | 96752718  | 96753921  |
| chr9 | 97400534  | 97401873  |
| chr9 | 97431062  | 97431941  |
| chr9 | 97545023  | 97546293  |
| chr9 | 97676114  | 97677460  |
| chr9 | 98184984  | 98185870  |
| chr9 | 98280378  | 98281291  |
| chr9 | 99036530  | 99038249  |
| chr9 | 99452207  | 99452910  |
| chr9 | 99464134  | 99464354  |
| chr9 | 99472364  | 99473481  |
| chr9 | 99481875  | 99481983  |
| chr9 | 99482422  | 99483123  |
| chr9 | 99483174  | 99483337  |
| chr9 | 99483764  | 99483933  |
| chr9 | 99508234  | 99508378  |
| chr9 | 99514752  | 99522250  |
| chr9 | 99556930  | 99557453  |
| chr9 | 100000198 | 100001304 |
| chr9 | 100395495 | 100396563 |
| chr9 | 100745456 | 100746896 |
| chr9 | 100934618 | 100935589 |
| chr9 | 101017693 | 101018709 |
| chr9 | 101127026 | 101128314 |
| chr9 | 101222537 | 101223859 |
| chr9 | 101772259 | 101774522 |
| chr9 | 104154501 | 104155606 |
| chr9 | 104156515 | 104157431 |
| chr9 | 104169755 | 104172980 |
| chr9 | 108220123 | 108221337 |
| chr9 | 108320033 | 108320897 |
| chr9 | 108780849 | 108781668 |
| chr9 | 109799390 | 109800296 |
| chr9 | 109799503 | 109799615 |
| chr9 | 110616716 | 110618420 |

|      |           |           |
|------|-----------|-----------|
| chr9 | 111311419 | 111312249 |
| chr9 | 111613353 | 111614135 |
| chr9 | 111881523 | 111882379 |
| chr9 | 112029490 | 112030771 |
| chr9 | 114773956 | 114775069 |
| chr9 | 114796049 | 114796904 |
| chr9 | 114827662 | 114828672 |
| chr9 | 115757170 | 115758083 |
| chr9 | 115758748 | 115760945 |
| chr9 | 115799347 | 115800183 |
| chr9 | 115803190 | 115808037 |
| chr9 | 115810367 | 115811257 |
| chr9 | 115815255 | 115816511 |
| chr9 | 115823380 | 115824395 |
| chr9 | 115983383 | 115984266 |
| chr9 | 116172009 | 116173552 |
| chr9 | 116226747 | 116227671 |
| chr9 | 116444412 | 116445414 |
| chr9 | 116477915 | 116479052 |
| chr9 | 117313807 | 117314843 |
| chr9 | 117724824 | 117725692 |
| chr9 | 119445270 | 119446511 |
| chr9 | 119638902 | 119640133 |
| chr9 | 117669852 | 117671328 |
| chr9 | 117669852 | 117669927 |
| chr9 | 121498112 | 121499308 |
| chr9 | 124855206 | 124856025 |
| chr9 | 125183128 | 125183489 |
| chr9 | 125703650 | 125704063 |
| chr9 | 126089628 | 126090613 |
| chr9 | 127020841 | 127022392 |
| chr9 | 128003344 | 128004597 |
| chr9 | 128275381 | 128277383 |
| chr9 | 128275834 | 128276062 |
| chr9 | 128276288 | 128276408 |
| chr9 | 128276737 | 128276991 |
| chr9 | 128770833 | 128771958 |
| chr9 | 129123519 | 129124896 |
| chr9 | 129423160 | 129424916 |
| chr9 | 129497226 | 129498600 |
| chr9 | 129581935 | 129582883 |
| chr9 | 129837780 | 129838857 |
| chr9 | 130098922 | 130099823 |

|      |           |           |
|------|-----------|-----------|
| chr9 | 130206021 | 130209188 |
| chr9 | 130287709 | 130288497 |
| chr9 | 130307212 | 130308432 |
| chr9 | 130336337 | 130337397 |
| chr9 | 130462582 | 130463627 |
| chr9 | 130610837 | 130612236 |
| chr9 | 130654269 | 130657074 |
| chr9 | 130769582 | 130770527 |
| chr9 | 130784057 | 130784959 |
| chr9 | 130797091 | 130797984 |
| chr9 | 130897277 | 130898136 |
| chr9 | 130954699 | 130955848 |
| chr9 | 131060590 | 131061819 |
| chr9 | 131084294 | 131085349 |
| chr9 | 130940842 | 130941654 |
| chr9 | 131533687 | 131534929 |
| chr9 | 131607036 | 131608275 |
| chr9 | 131607524 | 131607806 |
| chr9 | 131928997 | 131931710 |
| chr9 | 131936538 | 131938793 |
| chr9 | 132095941 | 132097480 |
| chr9 | 132245085 | 132246003 |
| chr9 | 132257175 | 132259021 |
| chr9 | 132275143 | 132278253 |
| chr9 | 132277001 | 132277508 |
| chr9 | 132518036 | 132518854 |
| chr9 | 133305586 | 133306455 |
| chr9 | 133709902 | 133710715 |
| chr9 | 133777665 | 133778466 |
| chr9 | 134417911 | 134419751 |
| chr9 | 134420324 | 134421142 |
| chr9 | 134614172 | 134616151 |
| chr9 | 135368113 | 135368922 |
| chr9 | 135819898 | 135820018 |
| chr9 | 136161842 | 136161930 |
| chr9 | 136212126 | 136212944 |
| chr9 | 136242194 | 136243569 |
| chr9 | 136253426 | 136254218 |
| chr9 | 136366688 | 136368221 |
| chr9 | 136461912 | 136464173 |
| chr9 | 136738661 | 136739976 |
| chr9 | 137029579 | 137030482 |
| chr9 | 137030476 | 137030482 |

|      |           |           |
|------|-----------|-----------|
| chr9 | 137177996 | 137179212 |
| chr9 | 137259092 | 137259909 |
| chr9 | 137270354 | 137271203 |
| chr9 | 137290775 | 137292039 |
| chr9 | 137303699 | 137304708 |
| chr9 | 137305239 | 137306106 |
| chr9 | 137326253 | 137327163 |
| chr9 | 137339185 | 137341823 |
| chr9 | 137326289 | 137326430 |
| chr9 | 137552229 | 137553158 |
| chr9 | 137552463 | 137552717 |
| chr9 | 137786284 | 137787144 |
| chr9 | 137915445 | 137915909 |
| chr9 | 137967100 | 137968042 |
| chr9 | 138283886 | 138284917 |
| chr9 | 138315134 | 138315929 |
| chr9 | 138390940 | 138393040 |
| chr9 | 138786456 | 138787691 |
| chr9 | 138800112 | 138801093 |
| chr9 | 138806434 | 138809534 |
| chr9 | 138810284 | 138811467 |
| chr9 | 138863474 | 138864605 |
| chr9 | 139440259 | 139441355 |
| chr9 | 139453256 | 139454597 |
| chr9 | 139588131 | 139589606 |
| chr9 | 139619612 | 139620710 |
| chr9 | 139645622 | 139646824 |
| chr9 | 139741905 | 139743050 |
| chr9 | 139753158 | 139754422 |
| chr9 | 139741905 | 139743050 |
| chr9 | 139940426 | 139941770 |
| chr9 | 140121184 | 140122627 |
| chr9 | 140188467 | 140189683 |
| chr9 | 140222363 | 140222611 |
| chr9 | 140369964 | 140370970 |
| chr9 | 140403494 | 140403926 |
| chr9 | 140403885 | 140403996 |
| chr9 | 140428773 | 140429802 |
| chr9 | 140442050 | 140442493 |
| chr9 | 140446370 | 140447561 |
| chr9 | 140506019 | 140507288 |
| chr9 | 140777025 | 140782698 |
| chr9 | 140783841 | 140784785 |

|      |           |           |
|------|-----------|-----------|
| chr9 | 140777025 | 140782698 |
| chr9 | 140783841 | 140784785 |
| chrX | 9431199   | 9431316   |
| chrX | 16240985  | 16242276  |
| chrX | 47271840  | 47272658  |
| chrX | 47833881  | 47837475  |
| chrX | 52963892  | 52964629  |
| chrX | 58324092  | 58325168  |
| chrX | 58336366  | 58337947  |
| chrX | 58338849  | 58339739  |
| chrX | 58341344  | 58343250  |
| chrX | 58343791  | 58345565  |
| chrX | 58354079  | 58355667  |
| chrX | 58377830  | 58377892  |
| chrX | 58416107  | 58416317  |
| chrX | 58559376  | 58561899  |
| chrX | 58562719  | 58564246  |
| chrX | 58561144  | 58561546  |
| chrX | 58561877  | 58561899  |
| chrX | 58563959  | 58564161  |
| chrX | 61685592  | 61685758  |
| chrX | 61686303  | 61686539  |
| chrX | 61687315  | 61687493  |
| chrX | 61694638  | 61694832  |
| chrX | 61695802  | 61696019  |
| chrX | 61717721  | 61717972  |
| chrX | 61720074  | 61720238  |
| chrX | 61720107  | 61720638  |
| chrX | 61721081  | 61721241  |
| chrX | 61726195  | 61727004  |
| chrX | 61727770  | 61729873  |
| chrX | 61730335  | 61734685  |
| chrX | 61726431  | 61727004  |
| chrX | 61727770  | 61729873  |
| chrX | 61731219  | 61731461  |
| chrX | 61732275  | 61734649  |
| chrX | 61732469  | 61733490  |
| chrX | 61733913  | 61734249  |
| chrX | 61851707  | 61851943  |
| chrX | 67937861  | 67938725  |
| chrX | 68344933  | 68346014  |
| chrX | 68345564  | 68345686  |
| chrX | 71216031  | 71217458  |

|      |           |           |
|------|-----------|-----------|
| chrX | 71217797  | 71218618  |
| chrX | 71524952  | 71526144  |
| chrX | 72631697  | 72632547  |
| chrX | 72997531  | 72997662  |
| chrX | 73080629  | 73081429  |
| chrX | 73339860  | 73341147  |
| chrX | 73358614  | 73359363  |
| chrX | 77358858  | 77360421  |
| chrX | 102897792 | 102898750 |
| chrX | 102954147 | 102954997 |
| chrX | 103160460 | 103161244 |
| chrX | 104294844 | 104295928 |
| chrX | 104294913 | 104295928 |
| chrX | 105584135 | 105586008 |
| chrX | 107060676 | 107061176 |
| chrX | 107136684 | 107137883 |
| chrX | 108620515 | 108621263 |
| chrX | 109643584 | 109644555 |
| chrX | 109980403 | 109981412 |
| chrX | 111310105 | 111311136 |
| chrX | 112278559 | 112279063 |
| chrX | 115004684 | 115005529 |
| chrX | 115006660 | 115007819 |
| chrX | 118252289 | 118253053 |
| chrX | 119593148 | 119593527 |
| chrX | 129299724 | 129300417 |
| chrX | 130626722 | 130626978 |
| chrX | 131322675 | 131323372 |
| chrX | 134416709 | 134418120 |
| chrX | 134420302 | 134422217 |
| chrX | 134444556 | 134445712 |
| chrX | 149531583 | 149533084 |
| chrX | 150330726 | 150331505 |
| chrX | 152063909 | 152064870 |
| chrX | 153199649 | 153200558 |
| chrY | 10043609  | 10043893  |
| chrY | 10044327  | 10044379  |
| chrY | 13454256  | 13455599  |
| chrY | 13457705  | 13459215  |
| chrY | 13448262  | 13451988  |
| chrY | 13680559  | 13681164  |
| chrY | 13704280  | 13704461  |
| chrY | 13810653  | 13811330  |

|      |          |          |
|------|----------|----------|
| chrY | 13869169 | 13870011 |
| chrY | 58974475 | 58975871 |
| chrY | 58988022 | 58989319 |
| chrY | 59001468 | 59002451 |
| chrY | 58976093 | 58984162 |

| Gene_ID       | log2(Fold_c<br>hange) | PValue    | FDR       | shEZH2_<br>rep1 | shEZH2_<br>_rep2 | shCtrl_<br>rep1 | shCtrl_<br>ep2 |
|---------------|-----------------------|-----------|-----------|-----------------|------------------|-----------------|----------------|
| IRS4          | -1.487                | 5.99E-126 | 7.48E-122 | 57269           | 70420            | 2E+05           | 2E+05          |
| METTL7A       | -1.771                | 8.12E-126 | 7.48E-122 | 1011            | 1168             | 3805            | 3631           |
| C1orf95       | -3.407                | 1.29E-122 | 8.89E-119 | 81              | 88               | 937             | 858            |
| RP11-46C20.1  | -1.531                | 1.36E-110 | 7.50E-107 | 2181            | 2502             | 6737            | 6793           |
| QPRT          | -1.386                | 2.72E-87  | 1.08E-83  | 1666            | 1890             | 4736            | 4555           |
| DDIT4         | -1.284                | 5.43E-87  | 1.88E-83  | 4038            | 5266             | 11541           | 11115          |
| FAM210B       | -1.662                | 5.23E-86  | 1.61E-82  | 1029            | 1506             | 4088            | 3935           |
| SLC2A12       | -1.713                | 5.46E-85  | 1.51E-81  | 664             | 734              | 2238            | 2347           |
| HIST1H1D      | -1.224                | 4.40E-81  | 1.11E-77  | 6239            | 8094             | 16627           | 16864          |
| HIST1H4A      | -1.366                | 1.33E-80  | 3.07E-77  | 2032            | 2231             | 5643            | 5343           |
| C14orf132     | -1.653                | 4.56E-79  | 9.71E-76  | 579             | 753              | 2032            | 2158           |
| DTL           | -1.201                | 1.81E-78  | 3.57E-75  | 4181            | 4774             | 10463           | 10129          |
| BCHE          | -1.698                | 4.55E-77  | 8.38E-74  | 477             | 648              | 1805            | 1846           |
| TXLNB         | -3.676                | 2.68E-75  | 4.64E-72  | 35              | 32               | 461             | 398            |
| TSC22D3       | -1.31                 | 1.42E-74  | 2.32E-71  | 1583            | 1759             | 4205            | 4083           |
| MYC           | -1.092                | 1.15E-70  | 1.65E-67  | 6679            | 8259             | 16440           | 15402          |
| STON1-GTF2A1L | -1.963                | 1.19E-70  | 1.65E-67  | 308             | 332              | 1211            | 1285           |
| SEMA3A        | -2.008                | 2.39E-70  | 3.15E-67  | 248             | 295              | 1053            | 1132           |
| CNTN1         | -1.493                | 2.18E-67  | 2.74E-64  | 628             | 787              | 1930            | 2053           |
| TEX15         | -1.361                | 2.69E-66  | 3.24E-63  | 1663            | 2292             | 4864            | 5293           |
| NREP          | -1.305                | 1.72E-65  | 1.99E-62  | 923             | 1074             | 2505            | 2430           |
| DHFR          | -1.007                | 2.28E-65  | 2.53E-62  | 22450           | 28268            | 51382           | 50580          |
| GPM6A         | -1.701                | 3.58E-65  | 3.81E-62  | 400             | 582              | 1592            | 1602           |
| TP53INP1      | -1.476                | 6.54E-65  | 6.70E-62  | 674             | 770              | 1948            | 2069           |
| ALDH1L2       | -1.355                | 3.23E-64  | 3.19E-61  | 899             | 1087             | 2453            | 2627           |
| HIST1H2BL     | -1.245                | 3.40E-64  | 3.24E-61  | 6214            | 8742             | 18313           | 17128          |
| RMI2          | -1.324                | 3.68E-62  | 3.39E-59  | 782             | 911              | 2150            | 2089           |
| CDKN1A        | -1.335                | 1.71E-61  | 1.53E-58  | 880             | 1156             | 2694            | 2443           |
| CA2           | -1.753                | 2.59E-61  | 2.24E-58  | 519             | 534              | 1911            | 1639           |
| RIMS3         | -1.474                | 1.04E-60  | 8.75E-58  | 472             | 565              | 1459            | 1423           |
| GALNT5        | -2.787                | 1.01E-59  | 8.24E-57  | 49              | 66               | 396             | 399            |
| NDRG1         | -1.121                | 8.77E-59  | 6.74E-56  | 1984            | 2680             | 5137            | 5007           |
| BMF           | -1.578                | 1.57E-57  | 1.14E-54  | 392             | 450              | 1244            | 1271           |
| MYB           | -1.814                | 8.53E-56  | 6.05E-53  | 209             | 257              | 826             | 813            |
| ARRDC4        | -1.133                | 3.49E-55  | 2.41E-52  | 1293            | 1684             | 3197            | 3332           |
| DDR2          | -1.294                | 1.58E-54  | 1.06E-51  | 1287            | 1384             | 3128            | 3422           |
| MCM6          | -1.001                | 8.82E-54  | 5.81E-51  | 3165            | 3571             | 6724            | 6756           |
| COL5A2        | -1.353                | 1.12E-53  | 7.21E-51  | 643             | 706              | 1729            | 1717           |
| BNIP3L        | -1.014                | 1.13E-52  | 7.08E-50  | 2153            | 2836             | 5151            | 4927           |



|               |        |          |          |      |      |       |       |
|---------------|--------|----------|----------|------|------|-------|-------|
| IFI44L        | -3.745 | 1.66E-52 | 1.02E-49 | 19   | 17   | 229   | 256   |
| SEMA3D        | -1.362 | 4.86E-52 | 2.92E-49 | 509  | 598  | 1409  | 1437  |
| ABHD14B       | -1.2   | 1.00E-51 | 5.88E-49 | 973  | 1337 | 2734  | 2575  |
| CXCR4         | -1.42  | 1.06E-51 | 6.12E-49 | 668  | 988  | 2289  | 2143  |
| LRP2          | -1.27  | 1.50E-51 | 8.46E-49 | 1313 | 1364 | 3385  | 3072  |
| TSPYL4        | -1.022 | 8.88E-51 | 4.91E-48 | 1448 | 1750 | 3205  | 3288  |
| NFATC4        | -1.26  | 1.21E-50 | 6.44E-48 | 745  | 839  | 1968  | 1826  |
| TXNIP         | -1.098 | 1.85E-50 | 9.66E-48 | 1959 | 2293 | 4321  | 4780  |
| PLCXD1        | -1.084 | 4.25E-50 | 2.17E-47 | 1279 | 1432 | 2899  | 2850  |
| RP1-152L7.5   | -1.353 | 2.05E-48 | 9.76E-46 | 501  | 646  | 1543  | 1387  |
| IKZF2         | -1.301 | 1.41E-47 | 6.32E-45 | 476  | 602  | 1337  | 1319  |
| HIST1H2AE     | -1.237 | 1.42E-47 | 6.32E-45 | 918  | 1047 | 2479  | 2152  |
| PAQR8         | -1.239 | 1.50E-47 | 6.56E-45 | 947  | 1013 | 2252  | 2374  |
| KLHL24        | -1.044 | 3.69E-46 | 1.52E-43 | 1330 | 1499 | 2870  | 2962  |
| NRBP2         | -1.636 | 8.88E-46 | 3.61E-43 | 219  | 265  | 763   | 742   |
| DDB2          | -1.583 | 2.39E-45 | 9.43E-43 | 344  | 353  | 1070  | 1019  |
| RP11-120I21.2 | -1.645 | 4.35E-45 | 1.67E-42 | 298  | 457  | 1157  | 1205  |
| ATHL1         | -1.365 | 6.92E-45 | 2.62E-42 | 449  | 532  | 1338  | 1189  |
| AHNAK2        | -1.377 | 1.85E-44 | 6.82E-42 | 499  | 523  | 1329  | 1326  |
| IQGAP2        | -1.025 | 3.48E-44 | 1.27E-41 | 1261 | 1445 | 2694  | 2811  |
| GJB2          | -2.369 | 5.72E-44 | 2.06E-41 | 59   | 98   | 397   | 415   |
| PPP1R16B      | -1.731 | 1.35E-43 | 4.60E-41 | 166  | 201  | 621   | 598   |
| HIST2H2AB     | -1.222 | 1.71E-43 | 5.77E-41 | 2398 | 3705 | 7125  | 7109  |
| SCN9A         | -1.324 | 1.84E-43 | 6.14E-41 | 427  | 530  | 1174  | 1223  |
| HMG5          | -1.378 | 9.90E-43 | 3.22E-40 | 479  | 714  | 1534  | 1567  |
| VCAN          | -1.16  | 2.01E-42 | 6.39E-40 | 4601 | 4498 | 10430 | 9909  |
| LPPR4         | -2.096 | 3.95E-42 | 1.23E-39 | 90   | 121  | 429   | 474   |
| CRABP2        | -1.225 | 5.17E-42 | 1.57E-39 | 793  | 956  | 2223  | 1867  |
| KIT           | -1.058 | 7.78E-42 | 2.29E-39 | 850  | 989  | 1959  | 1871  |
| CLMN          | -1.126 | 1.05E-41 | 3.04E-39 | 715  | 842  | 1663  | 1736  |
| FRMD4B        | -1.173 | 1.98E-41 | 5.58E-39 | 600  | 731  | 1459  | 1542  |
| BBC3          | -1.385 | 3.26E-40 | 8.83E-38 | 382  | 442  | 1140  | 1012  |
| LUM           | -2.193 | 4.79E-40 | 1.26E-37 | 90   | 132  | 461   | 555   |
| SPATA18       | -1.783 | 6.35E-40 | 1.66E-37 | 134  | 194  | 578   | 551   |
| BTN3A2        | -1.006 | 9.09E-40 | 2.35E-37 | 1036 | 1164 | 2223  | 2196  |
| ZDHHC22       | -1.38  | 2.24E-39 | 5.74E-37 | 444  | 515  | 1358  | 1139  |
| LAMA4         | -1.276 | 2.36E-39 | 5.99E-37 | 401  | 475  | 1078  | 1044  |
| HIST1H2BF     | -1.028 | 9.48E-39 | 2.32E-36 | 4235 | 6265 | 11074 | 10339 |
| EFHC1         | -1.05  | 1.71E-38 | 4.14E-36 | 1040 | 1217 | 2223  | 2452  |
| SOX5          | -1.895 | 2.54E-38 | 6.05E-36 | 139  | 136  | 502   | 521   |
| EMX2OS        | -2.012 | 2.19E-37 | 4.93E-35 | 86   | 142  | 469   | 451   |

|               |        |          |          |      |      |      |      |
|---------------|--------|----------|----------|------|------|------|------|
| SELENBP1      | -1.607 | 2.33E-37 | 5.19E-35 | 236  | 238  | 740  | 704  |
| FAM105A       | -1.261 | 2.92E-37 | 6.46E-35 | 395  | 521  | 1079 | 1117 |
| SLC1A1        | -2.242 | 3.78E-37 | 8.29E-35 | 92   | 81   | 389  | 430  |
| GPR153        | -1.181 | 4.67E-36 | 9.65E-34 | 459  | 586  | 1152 | 1218 |
| SLITRK6       | -2.677 | 9.84E-36 | 1.97E-33 | 39   | 34   | 224  | 244  |
| AP000472.2    | -1.355 | 1.31E-35 | 2.60E-33 | 1851 | 1876 | 4210 | 5325 |
| HCN3          | -1.378 | 2.01E-35 | 3.95E-33 | 312  | 435  | 935  | 1007 |
| TRIM6         | -1.424 | 3.11E-35 | 6.05E-33 | 252  | 309  | 726  | 780  |
| DEPTOR        | -1.732 | 3.30E-35 | 6.39E-33 | 164  | 264  | 688  | 734  |
| HIST1H2BG     | -1.237 | 7.97E-35 | 1.47E-32 | 352  | 447  | 963  | 920  |
| SLC2A3        | -1.084 | 2.02E-34 | 3.70E-32 | 681  | 849  | 1540 | 1704 |
| HAPLN3        | -1.626 | 2.90E-34 | 5.25E-32 | 145  | 211  | 562  | 537  |
| CALCRL        | -1.876 | 4.00E-34 | 7.14E-32 | 89   | 104  | 358  | 351  |
| AL133493.2    | -1.891 | 4.03E-34 | 7.14E-32 | 95   | 102  | 372  | 359  |
| DOCK11        | -1.154 | 5.50E-34 | 9.62E-32 | 464  | 520  | 1118 | 1072 |
| GAB2          | -1.238 | 1.21E-33 | 2.08E-31 | 357  | 492  | 1010 | 993  |
| DCLK1         | -1.433 | 1.45E-33 | 2.46E-31 | 251  | 288  | 697  | 759  |
| DNAH11        | -1.316 | 2.74E-33 | 4.60E-31 | 279  | 347  | 763  | 796  |
| FDXR          | -1.366 | 3.20E-33 | 5.33E-31 | 297  | 315  | 792  | 786  |
| ABCA1         | -2.245 | 5.82E-33 | 9.52E-31 | 84   | 66   | 363  | 349  |
| PRKG2         | -1.484 | 9.28E-33 | 1.50E-30 | 180  | 211  | 559  | 535  |
| ABCG1         | -1.991 | 1.08E-32 | 1.73E-30 | 73   | 80   | 314  | 295  |
| ST8SIA4       | -1.518 | 1.15E-32 | 1.85E-30 | 215  | 222  | 617  | 635  |
| EGFR          | -1.074 | 1.30E-32 | 2.06E-30 | 507  | 589  | 1170 | 1137 |
| ACVR1C        | -1.377 | 1.32E-32 | 2.08E-30 | 294  | 401  | 851  | 955  |
| NRCAM         | -1.04  | 1.79E-32 | 2.79E-30 | 677  | 738  | 1488 | 1421 |
| NTRK2         | -1.931 | 2.84E-32 | 4.42E-30 | 86   | 146  | 464  | 421  |
| GPR160        | -1.031 | 3.08E-32 | 4.75E-30 | 610  | 728  | 1329 | 1406 |
| LRRTM4        | -1.101 | 3.09E-32 | 4.75E-30 | 668  | 701  | 1444 | 1492 |
| NOG           | -2.397 | 3.46E-32 | 5.29E-30 | 66   | 51   | 330  | 287  |
| AMIGO2        | -1.985 | 1.03E-31 | 1.52E-29 | 76   | 102  | 386  | 319  |
| FAS           | -1.414 | 1.06E-31 | 1.56E-29 | 196  | 264  | 609  | 617  |
| GLRX          | -1.294 | 3.92E-31 | 5.58E-29 | 253  | 316  | 692  | 704  |
| GALNT12       | -1.486 | 5.75E-31 | 8.07E-29 | 184  | 205  | 531  | 559  |
| SLITRK1       | -3.028 | 6.39E-31 | 8.92E-29 | 20   | 29   | 234  | 167  |
| RP11-558F24.4 | -1.297 | 8.31E-31 | 1.14E-28 | 287  | 391  | 802  | 864  |
| TNFAIP8       | -1.082 | 9.97E-31 | 1.36E-28 | 474  | 542  | 1109 | 1042 |
| CD24P4        | -1.374 | 1.21E-30 | 1.65E-28 | 223  | 251  | 631  | 598  |
| SULF1         | -1.261 | 1.51E-30 | 2.04E-28 | 472  | 683  | 1515 | 1254 |
| AK7           | -2.015 | 2.20E-30 | 2.93E-28 | 71   | 107  | 398  | 322  |
| NDNF          | -1.073 | 3.79E-30 | 4.99E-28 | 595  | 644  | 1365 | 1242 |

|              |        |          |          |      |     |      |      |
|--------------|--------|----------|----------|------|-----|------|------|
| BTG2         | -1.087 | 4.10E-30 | 5.35E-28 | 813  | 917 | 2018 | 1657 |
| TSPAN2       | -1.954 | 4.79E-30 | 6.19E-28 | 72   | 75  | 293  | 277  |
| ASIC1        | -1.469 | 4.88E-30 | 6.27E-28 | 335  | 309 | 904  | 879  |
| SLC25A27     | -1.626 | 6.59E-30 | 8.36E-28 | 250  | 291 | 729  | 941  |
| DISC1        | -1.171 | 6.93E-30 | 8.75E-28 | 470  | 566 | 1084 | 1249 |
| IGFBP5       | -1.562 | 7.36E-30 | 9.26E-28 | 1116 | 909 | 3232 | 2749 |
| 42252        | -1.022 | 9.49E-30 | 1.19E-27 | 477  | 580 | 1087 | 1060 |
| SOSTDC1      | -1.736 | 1.37E-29 | 1.69E-27 | 100  | 110 | 345  | 355  |
| PCK2         | -1.139 | 1.76E-29 | 2.14E-27 | 652  | 646 | 1412 | 1446 |
| RP4-717I23.3 | -1.133 | 1.97E-29 | 2.39E-27 | 526  | 571 | 1145 | 1261 |
| S1PR1        | -1.481 | 2.75E-29 | 3.31E-27 | 147  | 186 | 481  | 449  |
| LPL          | -1.862 | 4.26E-29 | 5.04E-27 | 75   | 83  | 293  | 282  |
| IFIT1        | -1.45  | 5.24E-29 | 6.12E-27 | 203  | 208 | 567  | 556  |
| RGS16        | -1.035 | 6.22E-29 | 7.19E-27 | 526  | 614 | 1130 | 1206 |
| RNASE4       | -1.589 | 6.40E-29 | 7.38E-27 | 151  | 172 | 528  | 444  |
| FZD4         | -1.043 | 7.19E-29 | 8.25E-27 | 507  | 638 | 1132 | 1228 |
| LPPR3        | -1.805 | 8.65E-29 | 9.80E-27 | 92   | 93  | 323  | 324  |
| MT2A         | -1.276 | 8.70E-29 | 9.82E-27 | 342  | 357 | 890  | 803  |
| ZNF83        | -1.62  | 1.43E-28 | 1.57E-26 | 108  | 161 | 413  | 414  |
| MAML2        | -1.892 | 1.61E-28 | 1.76E-26 | 132  | 119 | 428  | 504  |
| GNG2         | -1.784 | 2.07E-28 | 2.24E-26 | 93   | 95  | 322  | 326  |
| C16orf74     | -1.967 | 2.36E-28 | 2.53E-26 | 65   | 76  | 299  | 253  |
| NR5A2        | -1.34  | 5.39E-28 | 5.54E-26 | 225  | 267 | 665  | 581  |
| CFHR3        | -2.641 | 6.18E-28 | 6.33E-26 | 25   | 25  | 165  | 148  |
| PLD1         | -1.307 | 1.19E-27 | 1.20E-25 | 259  | 285 | 713  | 633  |
| PRODH        | -2.216 | 1.50E-27 | 1.50E-25 | 35   | 55  | 222  | 197  |
| CCDC74B      | -1.283 | 1.70E-27 | 1.67E-25 | 287  | 297 | 727  | 694  |
| TMCC3        | -1.101 | 1.74E-27 | 1.70E-25 | 379  | 430 | 869  | 866  |
| LIG1         | -1.175 | 1.79E-27 | 1.75E-25 | 276  | 356 | 718  | 709  |
| CDH10        | -2.393 | 2.01E-27 | 1.95E-25 | 26   | 42  | 187  | 171  |
| ACSF2        | -1.288 | 2.46E-27 | 2.37E-25 | 262  | 286 | 648  | 690  |
| HPGD         | -1.334 | 3.01E-27 | 2.90E-25 | 181  | 237 | 522  | 532  |
| FAM129A      | -1.008 | 3.84E-27 | 3.67E-25 | 444  | 587 | 1036 | 1037 |
| CNTNAP2      | -1.089 | 4.13E-27 | 3.91E-25 | 841  | 884 | 2018 | 1653 |
| COMTD1       | -1.068 | 6.51E-27 | 6.10E-25 | 435  | 514 | 1053 | 937  |
| DPM3         | -1.097 | 7.14E-27 | 6.65E-25 | 392  | 486 | 998  | 880  |
| CCBL1        | -1.47  | 9.93E-27 | 9.15E-25 | 131  | 158 | 411  | 390  |
| HTRA1        | -1.753 | 1.20E-26 | 1.10E-24 | 81   | 90  | 300  | 277  |
| DCHS2        | -1.883 | 1.25E-26 | 1.15E-24 | 56   | 80  | 256  | 246  |
| ANKRD34B     | -1.355 | 1.56E-26 | 1.42E-24 | 202  | 272 | 652  | 561  |
| ST3GAL1      | -1.028 | 1.66E-26 | 1.49E-24 | 482  | 577 | 1152 | 1008 |

|               |        |          |          |      |      |       |       |
|---------------|--------|----------|----------|------|------|-------|-------|
| CTD-2267D19.3 | -1.081 | 2.12E-26 | 1.89E-24 | 349  | 418  | 808   | 815   |
| PDE7B         | -2.68  | 3.34E-26 | 2.94E-24 | 22   | 22   | 149   | 134   |
| PROCR         | -1.001 | 3.60E-26 | 3.15E-24 | 424  | 552  | 1002  | 951   |
| CORO6         | -1.594 | 3.93E-26 | 3.43E-24 | 123  | 184  | 503   | 424   |
| NEAT1         | -1.217 | 4.68E-26 | 4.07E-24 | 7904 | 8980 | 16343 | 22896 |
| COL4A4        | -1.417 | 4.88E-26 | 4.23E-24 | 151  | 198  | 447   | 485   |
| MSTN          | -2.345 | 6.04E-26 | 5.19E-24 | 29   | 35   | 161   | 165   |
| CRYL1         | -2.046 | 7.15E-26 | 6.12E-24 | 48   | 56   | 205   | 225   |
| CORO2A        | -1.327 | 8.80E-26 | 7.46E-24 | 230  | 360  | 759   | 722   |
| CAMK2B        | -1.439 | 9.22E-26 | 7.80E-24 | 137  | 182  | 418   | 447   |
| CGNL1         | -1.162 | 1.16E-25 | 9.72E-24 | 312  | 445  | 825   | 869   |
| SLITRK3       | -1.151 | 1.27E-25 | 1.05E-23 | 268  | 356  | 689   | 697   |
| GPRC5B        | -1.014 | 1.46E-25 | 1.20E-23 | 459  | 521  | 1036  | 944   |
| FAM81A        | -1.322 | 1.52E-25 | 1.25E-23 | 189  | 208  | 501   | 492   |
| TRIM7         | -1.13  | 1.63E-25 | 1.33E-23 | 285  | 377  | 747   | 702   |
| YPEL3         | -1.36  | 2.56E-25 | 2.08E-23 | 207  | 218  | 577   | 514   |
| EFEMP1        | -1.271 | 3.22E-25 | 2.60E-23 | 189  | 232  | 525   | 491   |
| EPAS1         | -1.031 | 3.23E-25 | 2.60E-23 | 398  | 459  | 866   | 886   |
| TMEM74B       | -1.465 | 5.87E-25 | 4.66E-23 | 124  | 144  | 365   | 375   |
| TFCP2L1       | -1.138 | 8.19E-25 | 6.42E-23 | 260  | 337  | 653   | 661   |
| LMOD1         | -1.281 | 1.57E-24 | 1.20E-22 | 261  | 414  | 808   | 833   |
| DKK2          | -2.365 | 1.92E-24 | 1.46E-22 | 39   | 35   | 214   | 168   |
| HMCN1         | -1.274 | 2.10E-24 | 1.60E-22 | 248  | 262  | 654   | 580   |
| C1QL4         | -1.571 | 2.26E-24 | 1.71E-22 | 104  | 111  | 320   | 319   |
| MBL1P         | -1.03  | 2.37E-24 | 1.79E-22 | 497  | 648  | 1088  | 1251  |
| MRAP2         | -1.654 | 3.55E-24 | 2.62E-22 | 97   | 96   | 303   | 305   |
| HIST1H3F      | -1.045 | 4.10E-24 | 3.00E-22 | 563  | 635  | 1357  | 1115  |
| IPCEF1        | -2.212 | 7.22E-24 | 5.12E-22 | 32   | 38   | 158   | 167   |
| BAI2          | -1.031 | 8.07E-24 | 5.70E-22 | 345  | 409  | 762   | 779   |
| SSH3          | -1.197 | 8.48E-24 | 5.97E-22 | 252  | 325  | 712   | 611   |
| SPOCK3        | -1.165 | 9.67E-24 | 6.74E-22 | 290  | 425  | 775   | 829   |
| KIAA1456      | -1.146 | 1.02E-23 | 7.11E-22 | 242  | 331  | 633   | 635   |
| ERAP2         | -2.54  | 1.63E-23 | 1.12E-21 | 19   | 24   | 129   | 122   |
| DPP4          | -1.303 | 1.95E-23 | 1.33E-21 | 182  | 233  | 552   | 472   |
| PPAPDC2       | -1.036 | 2.01E-23 | 1.37E-21 | 318  | 417  | 771   | 736   |
| RP11-551L14.1 | -1.195 | 2.05E-23 | 1.39E-21 | 232  | 254  | 569   | 544   |
| NYNRIN        | -1.113 | 2.20E-23 | 1.49E-21 | 558  | 531  | 1219  | 1137  |
| KIFC2         | -1.123 | 2.92E-23 | 1.95E-21 | 242  | 318  | 608   | 612   |
| NDST4         | -1.619 | 3.01E-23 | 2.01E-21 | 75   | 102  | 283   | 261   |
| BMP3          | -1.621 | 3.54E-23 | 2.34E-21 | 120  | 109  | 350   | 355   |
| SOWAHA        | -1.276 | 4.56E-23 | 2.99E-21 | 244  | 247  | 626   | 563   |

|              |        |          |          |     |     |      |      |
|--------------|--------|----------|----------|-----|-----|------|------|
| TCF24        | -1.111 | 6.61E-23 | 4.31E-21 | 277 | 314 | 664  | 613  |
| PLEKHH2      | -1.29  | 8.03E-23 | 5.19E-21 | 274 | 427 | 797  | 918  |
| NPY1R        | -1.005 | 8.17E-23 | 5.27E-21 | 457 | 485 | 977  | 914  |
| JAKMIP1      | -1.795 | 8.61E-23 | 5.54E-21 | 72  | 95  | 258  | 322  |
| GBP1P1       | -1.609 | 1.16E-22 | 7.36E-21 | 98  | 96  | 294  | 298  |
| PLA2G4A      | -1.093 | 1.21E-22 | 7.63E-21 | 598 | 865 | 1403 | 1718 |
| GCNT2        | -1.691 | 1.21E-22 | 7.66E-21 | 110 | 97  | 323  | 346  |
| YPEL5        | -1.013 | 1.37E-22 | 8.61E-21 | 564 | 753 | 1213 | 1445 |
| EDIL3        | -1.019 | 1.60E-22 | 1.01E-20 | 564 | 809 | 1287 | 1496 |
| TSLP         | -1.62  | 1.75E-22 | 1.09E-20 | 71  | 102 | 276  | 256  |
| KIAA0226L    | -1.361 | 2.01E-22 | 1.25E-20 | 152 | 168 | 394  | 428  |
| NMRK1        | -1.527 | 2.19E-22 | 1.36E-20 | 146 | 204 | 445  | 564  |
| ARHGAP24     | -1.281 | 2.81E-22 | 1.73E-20 | 147 | 183 | 408  | 394  |
| RNF165       | -1.986 | 3.23E-22 | 1.97E-20 | 35  | 56  | 179  | 182  |
| NOXA1        | -1.176 | 3.58E-22 | 2.18E-20 | 189 | 245 | 490  | 491  |
| SLC46A3      | -1.072 | 4.64E-22 | 2.80E-20 | 310 | 435 | 756  | 810  |
| HAGHL        | -1.288 | 5.26E-22 | 3.14E-20 | 238 | 228 | 573  | 565  |
| FAM78A       | -1.235 | 7.04E-22 | 4.15E-20 | 222 | 264 | 625  | 519  |
| CCDC85A      | -1.947 | 8.16E-22 | 4.78E-20 | 43  | 65  | 192  | 225  |
| SH2D5        | -1.083 | 9.70E-22 | 5.63E-20 | 241 | 307 | 575  | 586  |
| HES7         | -1.652 | 2.21E-21 | 1.25E-19 | 119 | 110 | 397  | 323  |
| FILIP1       | -2.571 | 2.89E-21 | 1.63E-19 | 19  | 31  | 127  | 171  |
| SLFN5        | -1.491 | 3.51E-21 | 1.97E-19 | 139 | 224 | 465  | 556  |
| TTYH2        | -1.168 | 3.77E-21 | 2.11E-19 | 188 | 261 | 519  | 490  |
| PLA2G7       | -2.965 | 5.50E-21 | 3.02E-19 | 9   | 14  | 94   | 87   |
| EFNB3        | -1.192 | 6.06E-21 | 3.32E-19 | 209 | 235 | 541  | 474  |
| SNCAIP       | -1.564 | 6.67E-21 | 3.64E-19 | 70  | 97  | 251  | 243  |
| PALMD        | -1.878 | 7.26E-21 | 3.95E-19 | 47  | 50  | 184  | 173  |
| SYTL4        | -1.431 | 7.52E-21 | 4.08E-19 | 155 | 143 | 406  | 398  |
| TCP11L2      | -1.591 | 8.65E-21 | 4.66E-19 | 99  | 96  | 315  | 273  |
| PPARGC1A     | -1.67  | 9.00E-21 | 4.84E-19 | 60  | 96  | 261  | 236  |
| FLJ23152     | -2.965 | 1.02E-20 | 5.47E-19 | 13  | 10  | 90   | 91   |
| MYT1         | -1.75  | 1.36E-20 | 7.24E-19 | 57  | 93  | 234  | 271  |
| MME          | -1.201 | 1.39E-20 | 7.34E-19 | 166 | 238 | 464  | 465  |
| PPFIA4       | -1.122 | 1.61E-20 | 8.46E-19 | 207 | 294 | 548  | 543  |
| RP11-124L5.7 | -1.129 | 1.69E-20 | 8.84E-19 | 221 | 250 | 500  | 530  |
| OXGR1        | -2.016 | 1.85E-20 | 9.64E-19 | 32  | 64  | 188  | 201  |
| PADI2        | -1.574 | 2.17E-20 | 1.13E-18 | 70  | 85  | 232  | 230  |
| NTNG1        | -1.317 | 2.25E-20 | 1.16E-18 | 150 | 185 | 387  | 448  |
| RNF144B      | -1.199 | 2.48E-20 | 1.27E-18 | 231 | 372 | 700  | 685  |
| BTN3A3       | -1.075 | 2.89E-20 | 1.47E-18 | 227 | 267 | 517  | 524  |

|               |        |          |          |     |     |     |     |
|---------------|--------|----------|----------|-----|-----|-----|-----|
| KCNAB2        | -1.763 | 3.12E-20 | 1.58E-18 | 55  | 83  | 259 | 210 |
| BCKDHB        | -1.05  | 4.51E-20 | 2.24E-18 | 349 | 544 | 939 | 910 |
| NTN4          | -1.629 | 6.45E-20 | 3.13E-18 | 68  | 79  | 215 | 240 |
| ZNF467        | -1.669 | 1.01E-19 | 4.85E-18 | 69  | 68  | 214 | 222 |
| TLR1          | -1.363 | 1.14E-19 | 5.45E-18 | 98  | 132 | 293 | 299 |
| LRRC3         | -1.015 | 1.20E-19 | 5.71E-18 | 256 | 312 | 595 | 553 |
| KIAA1217      | -1.299 | 1.37E-19 | 6.44E-18 | 117 | 154 | 326 | 341 |
| DLX6-AS1      | -1.023 | 1.53E-19 | 7.22E-18 | 265 | 298 | 582 | 562 |
| FRY           | -1.347 | 1.56E-19 | 7.35E-18 | 108 | 145 | 310 | 334 |
| SLC9A9        | -1.613 | 3.13E-19 | 1.43E-17 | 86  | 130 | 291 | 370 |
| FMNL1         | -1.181 | 3.41E-19 | 1.56E-17 | 156 | 217 | 440 | 406 |
| C12orf39      | -1.491 | 3.88E-19 | 1.76E-17 | 76  | 90  | 241 | 226 |
| DOC2A         | -1.055 | 4.10E-19 | 1.85E-17 | 321 | 323 | 679 | 659 |
| RP11-445F12.1 | -1.523 | 4.26E-19 | 1.92E-17 | 103 | 122 | 287 | 360 |
| SERINC4       | -1.267 | 4.77E-19 | 2.14E-17 | 124 | 153 | 349 | 318 |
| NOTCH3        | -1.213 | 5.45E-19 | 2.43E-17 | 318 | 292 | 748 | 666 |
| ANKRD63       | -1.224 | 7.17E-19 | 3.17E-17 | 148 | 166 | 384 | 350 |
| LBH           | -1.303 | 7.34E-19 | 3.24E-17 | 122 | 171 | 388 | 335 |
| TTC18         | -1.21  | 7.91E-19 | 3.48E-17 | 171 | 262 | 481 | 521 |
| PDK4          | -1.729 | 8.25E-19 | 3.62E-17 | 146 | 119 | 501 | 378 |
| MAPK15        | -1.226 | 1.11E-18 | 4.80E-17 | 133 | 155 | 336 | 338 |
| ARHGEF17      | -1.046 | 1.18E-18 | 5.09E-17 | 292 | 433 | 797 | 700 |
| TRAM1L1       | -1.286 | 1.21E-18 | 5.23E-17 | 153 | 156 | 362 | 392 |
| CCDC74A       | -1.035 | 1.42E-18 | 6.02E-17 | 363 | 390 | 841 | 702 |
| PIK3CD        | -1.183 | 1.48E-18 | 6.28E-17 | 152 | 210 | 397 | 425 |
| OGDHL         | -1.094 | 1.55E-18 | 6.55E-17 | 250 | 273 | 601 | 516 |
| ROR2          | -1.195 | 1.62E-18 | 6.80E-17 | 170 | 182 | 423 | 383 |
| HBQ1          | -1.561 | 1.65E-18 | 6.94E-17 | 100 | 94  | 313 | 260 |
| TNS3          | -1.038 | 2.17E-18 | 8.98E-17 | 302 | 470 | 783 | 802 |
| NKX1-2        | -1.032 | 2.72E-18 | 1.12E-16 | 302 | 323 | 681 | 597 |
| HPSE          | -1.188 | 3.34E-18 | 1.36E-16 | 151 | 172 | 358 | 378 |
| ADAMTS6       | -1.347 | 3.69E-18 | 1.50E-16 | 135 | 155 | 334 | 404 |
| CDH1          | -1.506 | 3.78E-18 | 1.54E-16 | 81  | 102 | 288 | 232 |
| RP11-347C18.3 | -2.117 | 3.90E-18 | 1.58E-16 | 21  | 36  | 122 | 126 |
| PDE3A         | -1.116 | 4.38E-18 | 1.77E-16 | 176 | 258 | 467 | 474 |
| MIR34A        | -2.007 | 6.27E-18 | 2.50E-16 | 29  | 43  | 161 | 129 |
| PRSS35        | -1.201 | 6.37E-18 | 2.53E-16 | 138 | 159 | 334 | 349 |
| FST           | -2.365 | 6.56E-18 | 2.60E-16 | 14  | 33  | 132 | 111 |
| CCDC110       | -1.515 | 6.72E-18 | 2.66E-16 | 68  | 89  | 242 | 207 |
| CCDC3         | -1.278 | 8.46E-18 | 3.32E-16 | 166 | 250 | 562 | 447 |
| UNC5A         | -2.414 | 8.99E-18 | 3.49E-16 | 12  | 25  | 100 | 98  |

|               |        |          |          |     |     |     |     |
|---------------|--------|----------|----------|-----|-----|-----|-----|
| SDAD1P1       | -1.601 | 1.12E-17 | 4.34E-16 | 93  | 77  | 264 | 252 |
| CFD           | -1.225 | 1.12E-17 | 4.34E-16 | 296 | 262 | 684 | 621 |
| HMGCLL1       | -1.83  | 1.40E-17 | 5.37E-16 | 46  | 101 | 254 | 269 |
| FXYD6         | -1.529 | 1.57E-17 | 6.01E-16 | 74  | 79  | 209 | 233 |
| BMP4          | -1.044 | 1.72E-17 | 6.54E-16 | 252 | 289 | 605 | 511 |
| MAPK4         | -1.408 | 1.72E-17 | 6.54E-16 | 73  | 104 | 237 | 233 |
| GDF10         | -2.632 | 2.10E-17 | 7.89E-16 | 8   | 22  | 92  | 95  |
| RP11-660L16.2 | -1.151 | 2.28E-17 | 8.55E-16 | 156 | 170 | 366 | 358 |
| ALS2CL        | -2.398 | 2.38E-17 | 8.86E-16 | 24  | 39  | 130 | 203 |
| IMPA2         | -1.045 | 2.44E-17 | 9.08E-16 | 224 | 242 | 500 | 462 |
| SLCO4C1       | -1.1   | 3.20E-17 | 1.17E-15 | 265 | 255 | 555 | 560 |
| IGSF10        | -1.382 | 3.20E-17 | 1.17E-15 | 144 | 126 | 359 | 345 |
| CDA           | -2.375 | 3.30E-17 | 1.21E-15 | 12  | 26  | 101 | 97  |
| RP11-12A2.3   | -3.076 | 3.76E-17 | 1.37E-15 | 17  | 5   | 90  | 97  |
| SCN4B         | -2.02  | 3.99E-17 | 1.45E-15 | 37  | 41  | 184 | 133 |
| RP11-326C3.7  | -1.765 | 4.96E-17 | 1.79E-15 | 51  | 48  | 159 | 178 |
| GLT8D2        | -1.031 | 5.23E-17 | 1.88E-15 | 181 | 227 | 424 | 410 |
| ABCC6P1       | -1.465 | 5.36E-17 | 1.92E-15 | 80  | 80  | 224 | 218 |
| PTP4A3        | -1.42  | 5.60E-17 | 1.99E-15 | 95  | 106 | 297 | 241 |
| DNAH6         | -1.41  | 7.02E-17 | 2.48E-15 | 139 | 160 | 341 | 454 |
| NKX2-1        | -1.233 | 1.04E-16 | 3.59E-15 | 111 | 139 | 311 | 277 |
| PGM5          | -1.883 | 1.23E-16 | 4.25E-15 | 27  | 42  | 128 | 127 |
| LYPD6         | -1.044 | 1.32E-16 | 4.53E-15 | 277 | 304 | 552 | 646 |
| AC116614.1    | -1.568 | 1.37E-16 | 4.71E-15 | 49  | 75  | 189 | 179 |
| TFEB          | -1.209 | 2.32E-16 | 7.75E-15 | 106 | 137 | 289 | 273 |
| PDE1A         | -1.648 | 3.08E-16 | 1.02E-14 | 63  | 61  | 178 | 211 |
| KCNJ4         | -1.921 | 3.56E-16 | 1.17E-14 | 34  | 34  | 139 | 119 |
| HHAT          | -1.022 | 4.04E-16 | 1.32E-14 | 210 | 242 | 491 | 427 |
| SIDT1         | -1.743 | 4.25E-16 | 1.38E-14 | 45  | 43  | 151 | 144 |
| GPR137C       | -1.133 | 4.29E-16 | 1.39E-14 | 218 | 231 | 450 | 535 |
| COL24A1       | -1.277 | 5.02E-16 | 1.61E-14 | 187 | 164 | 447 | 404 |
| PIK3IP1       | -1.379 | 5.28E-16 | 1.68E-14 | 74  | 117 | 262 | 235 |
| INPP4B        | -1.034 | 5.51E-16 | 1.75E-14 | 181 | 235 | 407 | 445 |
| FTLP12        | -1.214 | 5.83E-16 | 1.85E-14 | 111 | 132 | 298 | 266 |
| LONRF3        | -1.028 | 6.08E-16 | 1.93E-14 | 169 | 207 | 380 | 387 |
| COL21A1       | -1.93  | 6.87E-16 | 2.17E-14 | 28  | 33  | 122 | 111 |
| ELFN1         | -1.825 | 7.31E-16 | 2.29E-14 | 69  | 55  | 251 | 189 |
| TMEM37        | -1.636 | 7.35E-16 | 2.30E-14 | 44  | 53  | 158 | 144 |
| KCNK1         | -1.168 | 7.61E-16 | 2.38E-14 | 131 | 147 | 330 | 295 |
| ABCC6P2       | -1.691 | 8.44E-16 | 2.62E-14 | 53  | 59  | 160 | 202 |
| FAM70A        | -1.2   | 9.02E-16 | 2.79E-14 | 200 | 183 | 463 | 417 |

|               |               |                 |                 |            |            |            |            |
|---------------|---------------|-----------------|-----------------|------------|------------|------------|------------|
| KCNV1         | -1.976        | 1.04E-15        | 3.21E-14        | 61         | 38         | 194        | 196        |
| LAMP3         | -1.512        | 1.22E-15        | 3.74E-14        | 53         | 64         | 169        | 165        |
| CDH3          | -2.312        | 1.36E-15        | 4.13E-14        | 44         | 34         | 243        | 145        |
| CLYBL         | -1.468        | 1.88E-15        | 5.67E-14        | 92         | 137        | 272        | 362        |
| TSPAN11       | -1.616        | 2.34E-15        | 6.96E-14        | 63         | 69         | 177        | 228        |
| RP11-657O9.1  | -1.567        | 2.53E-15        | 7.51E-14        | 78         | 143        | 288        | 367        |
| ABAT          | -1.112        | 3.27E-15        | 9.61E-14        | 148        | 233        | 405        | 419        |
| RP11-182J1.14 | -1.136        | 3.66E-15        | 1.07E-13        | 186        | 203        | 388        | 467        |
| C11orf45      | -1.525        | 3.83E-15        | 1.12E-13        | 72         | 71         | 228        | 184        |
| NEURL1B       | -1.187        | 4.97E-15        | 1.44E-13        | 113        | 143        | 316        | 267        |
| BIRC3         | -1.754        | 5.97E-15        | 1.71E-13        | 41         | 38         | 130        | 137        |
| RP11-696N14.1 | -1.266        | 6.07E-15        | 1.74E-13        | 110        | 107        | 258        | 264        |
| ST8SIA6       | -2.023        | 6.75E-15        | 1.92E-13        | 27         | 25         | 113        | 99         |
| DENND1C       | -1.535        | 6.79E-15        | 1.93E-13        | 60         | 70         | 211        | 166        |
| USH1G         | -1.777        | 6.80E-15        | 1.93E-13        | 36         | 47         | 161        | 124        |
| RP1-45C12.1   | -2.256        | 7.45E-15        | 2.11E-13        | 14         | 25         | 84         | 103        |
| PROX1         | -1.082        | 9.23E-15        | 2.59E-13        | 191        | 194        | 436        | 379        |
| RCAN2         | -1.645        | 9.52E-15        | 2.66E-13        | 37         | 70         | 165        | 170        |
| EDNRB         | -2.025        | 1.06E-14        | 2.93E-13        | 19         | 30         | 107        | 93         |
| MRPL23-AS1    | -3.38         | 1.19E-14        | 3.27E-13        | 3          | 7          | 48         | 58         |
| SIRT4         | -1.194        | 1.22E-14        | 3.36E-13        | 99         | 119        | 241        | 258        |
| SNAP91        | -1.261        | 1.37E-14        | 3.75E-13        | 90         | 101        | 220        | 238        |
| STAT4         | -2.017        | 1.46E-14        | 3.97E-13        | 17         | 33         | 105        | 98         |
| SLC38A4       | -2.669        | 1.82E-14        | 4.88E-13        | 6          | 16         | 78         | 63         |
| PLA2G6        | -1.17         | 1.84E-14        | 4.94E-13        | 195        | 316        | 514        | 636        |
| ASNAP1        | -1.076        | 2.50E-14        | 6.55E-13        | 178        | 228        | 386        | 470        |
| CNPY1         | -1.168        | 2.58E-14        | 6.78E-13        | 93         | 128        | 250        | 247        |
| KCNH7         | -1.596        | 3.46E-14        | 8.97E-13        | 52         | 66         | 155        | 202        |
| <b>SOX21</b>  | <b>-1.198</b> | <b>3.48E-14</b> | <b>9.01E-13</b> | <b>115</b> | <b>196</b> | <b>373</b> | <b>341</b> |
| ADAMTS7       | -1.213        | 4.03E-14        | 1.04E-12        | 97         | 103        | 236        | 228        |
| LINC00621     | -1.023        | 5.06E-14        | 1.29E-12        | 198        | 203        | 433        | 382        |
| RP11-461C13.1 | -2.48         | 5.29E-14        | 1.35E-12        | 14         | 12         | 67         | 79         |
| GNG7          | -1.063        | 6.05E-14        | 1.53E-12        | 205        | 198        | 404        | 438        |
| ICAM1         | -1.418        | 7.45E-14        | 1.85E-12        | 122        | 95         | 292        | 288        |
| IFI35         | -1.463        | 8.46E-14        | 2.09E-12        | 84         | 70         | 204        | 221        |
| FBXO2         | -1.724        | 9.58E-14        | 2.35E-12        | 41         | 40         | 149        | 119        |
| PQLC3         | -1.352        | 1.02E-13        | 2.49E-12        | 67         | 77         | 197        | 171        |
| RPRML         | -1.5          | 1.06E-13        | 2.59E-12        | 65         | 59         | 189        | 162        |
| FRMPD1        | -1.414        | 1.06E-13        | 2.59E-12        | 54         | 69         | 157        | 171        |
| RP11-627G18.3 | -1.982        | 1.07E-13        | 2.60E-12        | 20         | 32         | 115        | 91         |
| PPP4R4        | -1.145        | 1.12E-13        | 2.74E-12        | 117        | 147        | 268        | 316        |



|              |        |          |          |     |     |     |     |
|--------------|--------|----------|----------|-----|-----|-----|-----|
| RP11-136K7.2 | -2.884 | 1.82E-13 | 4.36E-12 | 9   | 6   | 55  | 57  |
| PLSCR4       | -1.009 | 1.88E-13 | 4.48E-12 | 149 | 165 | 323 | 309 |
| ONECUT1      | -1.172 | 1.91E-13 | 4.56E-12 | 91  | 109 | 237 | 214 |
| ART5         | -1.084 | 2.05E-13 | 4.87E-12 | 108 | 131 | 258 | 249 |
| AQP4         | -1.753 | 2.41E-13 | 5.68E-12 | 44  | 44  | 173 | 124 |
| MDGA1        | -1.425 | 2.97E-13 | 6.93E-12 | 50  | 78  | 161 | 183 |
| C4orf34      | -1.116 | 3.11E-13 | 7.24E-12 | 154 | 237 | 382 | 466 |
| FIBIN        | -2.303 | 3.58E-13 | 8.29E-12 | 14  | 14  | 72  | 67  |
| PTPRZ1       | -1.501 | 3.85E-13 | 8.85E-12 | 61  | 124 | 242 | 282 |
| FBXO36       | -1.096 | 4.19E-13 | 9.56E-12 | 100 | 124 | 240 | 239 |
| ALPL         | -1.286 | 4.23E-13 | 9.63E-12 | 78  | 115 | 263 | 208 |
| MEGF10       | -1.509 | 4.72E-13 | 1.07E-11 | 42  | 71  | 175 | 147 |
| LINC00173    | -1.951 | 4.78E-13 | 1.08E-11 | 22  | 35  | 129 | 92  |
| KCNJ3        | -1.761 | 5.43E-13 | 1.22E-11 | 29  | 70  | 175 | 161 |
| CCDC64       | -1.281 | 7.82E-13 | 1.73E-11 | 61  | 80  | 175 | 168 |
| RORB         | -1.069 | 7.91E-13 | 1.75E-11 | 117 | 157 | 311 | 264 |
| GAS6         | -1.178 | 8.13E-13 | 1.79E-11 | 81  | 108 | 205 | 223 |
| DRAM1        | -1.453 | 9.41E-13 | 2.05E-11 | 58  | 54  | 151 | 156 |
| MLXIPL       | -1.194 | 9.97E-13 | 2.17E-11 | 111 | 114 | 236 | 279 |
| ITGA8        | -1.272 | 1.01E-12 | 2.20E-11 | 65  | 103 | 196 | 210 |
| GRID2        | -1.379 | 1.03E-12 | 2.25E-11 | 92  | 89  | 206 | 265 |
| CHRNA4       | -1.755 | 1.22E-12 | 2.63E-11 | 29  | 31  | 97  | 106 |
| STYK1        | -2.948 | 1.30E-12 | 2.79E-11 | 5   | 14  | 55  | 93  |
| LIF          | -1.092 | 1.47E-12 | 3.15E-11 | 111 | 160 | 315 | 263 |
| SLC2A4       | -1.126 | 1.56E-12 | 3.33E-11 | 117 | 129 | 247 | 290 |
| MIR210HG     | -1.145 | 1.71E-12 | 3.61E-11 | 100 | 150 | 304 | 249 |
| EML2         | -1.031 | 1.80E-12 | 3.79E-11 | 119 | 176 | 293 | 310 |
| PDE4B        | -1.299 | 2.07E-12 | 4.32E-11 | 56  | 78  | 172 | 158 |
| AC011242.6   | -1.627 | 2.21E-12 | 4.61E-11 | 33  | 42  | 107 | 125 |
| TRPM6        | -1.509 | 2.31E-12 | 4.80E-11 | 36  | 51  | 126 | 122 |
| GRB14        | -1.085 | 2.83E-12 | 5.79E-11 | 129 | 125 | 272 | 267 |
| SLC24A4      | -1.276 | 2.89E-12 | 5.90E-11 | 90  | 80  | 209 | 203 |
| RTN2         | -1.067 | 3.61E-12 | 7.29E-11 | 100 | 128 | 254 | 224 |
| ERICH2       | -1.337 | 5.81E-12 | 1.15E-10 | 51  | 91  | 182 | 177 |
| DLX5         | -1.033 | 5.81E-12 | 1.15E-10 | 105 | 150 | 273 | 249 |
| CR2          | -1.011 | 6.39E-12 | 1.25E-10 | 106 | 138 | 254 | 238 |
| TLR3         | -2.531 | 6.40E-12 | 1.25E-10 | 8   | 10  | 55  | 50  |
| RASSF6       | -1.929 | 6.42E-12 | 1.26E-10 | 26  | 24  | 83  | 108 |
| ZNF385B      | -1.176 | 7.41E-12 | 1.44E-10 | 80  | 104 | 192 | 224 |
| THSD7A       | -1.62  | 7.63E-12 | 1.48E-10 | 40  | 36  | 126 | 108 |
| AFAP1L2      | -1.457 | 8.55E-12 | 1.64E-10 | 52  | 75  | 149 | 200 |

|               |        |          |          |     |     |     |     |
|---------------|--------|----------|----------|-----|-----|-----|-----|
| FUT9          | -1.845 | 8.77E-12 | 1.68E-10 | 39  | 26  | 109 | 125 |
| PIK3R5        | -1.79  | 9.18E-12 | 1.75E-10 | 20  | 38  | 110 | 91  |
| RP11-159H10.3 | -1.542 | 9.39E-12 | 1.79E-10 | 30  | 53  | 126 | 116 |
| FREM1         | -2.572 | 1.00E-11 | 1.91E-10 | 10  | 9   | 64  | 50  |
| TDRD6         | -1.557 | 1.03E-11 | 1.96E-10 | 40  | 72  | 143 | 187 |
| ADAMTS2       | -1.015 | 1.13E-11 | 2.14E-10 | 134 | 141 | 266 | 290 |
| SYNPO         | -1.352 | 1.14E-11 | 2.15E-10 | 45  | 63  | 135 | 141 |
| RP11-480I12.4 | -2.13  | 1.27E-11 | 2.38E-10 | 14  | 16  | 67  | 65  |
| GAP43         | -1.109 | 1.38E-11 | 2.56E-10 | 103 | 150 | 247 | 299 |
| SPOCD1        | -1.408 | 1.44E-11 | 2.67E-10 | 39  | 60  | 132 | 131 |
| CEACAM1       | -2.03  | 1.63E-11 | 3.00E-10 | 19  | 21  | 70  | 94  |
| C1QTNF1       | -1.558 | 1.65E-11 | 3.03E-10 | 50  | 48  | 167 | 122 |
| AC009299.3    | -1.127 | 1.72E-11 | 3.16E-10 | 84  | 132 | 254 | 218 |
| PTPRB         | -1.406 | 1.91E-11 | 3.47E-10 | 44  | 60  | 127 | 149 |
| MIR148A       | -1.096 | 2.01E-11 | 3.65E-10 | 161 | 165 | 306 | 391 |
| TPTE2P1       | -1.523 | 2.07E-11 | 3.76E-10 | 44  | 46  | 116 | 143 |
| TMEM187       | -1.203 | 2.12E-11 | 3.83E-10 | 79  | 79  | 191 | 173 |
| CLUL1         | -1.235 | 2.16E-11 | 3.89E-10 | 90  | 113 | 278 | 200 |
| LRRK1         | -1.068 | 2.18E-11 | 3.92E-10 | 88  | 107 | 206 | 203 |
| HERC6         | -1.367 | 2.27E-11 | 4.08E-10 | 50  | 53  | 134 | 132 |
| SSPO          | -1.409 | 2.49E-11 | 4.46E-10 | 40  | 54  | 134 | 116 |
| MT1F          | -2.44  | 2.59E-11 | 4.63E-10 | 7   | 12  | 52  | 52  |
| CDKN1C        | -1.055 | 2.81E-11 | 4.99E-10 | 96  | 107 | 213 | 209 |
| RASGRP2       | -1.362 | 2.83E-11 | 5.03E-10 | 56  | 54  | 139 | 144 |
| ITGA2B        | -1.329 | 3.05E-11 | 5.39E-10 | 64  | 72  | 194 | 148 |
| HOPX          | -1.448 | 3.17E-11 | 5.58E-10 | 57  | 47  | 145 | 139 |
| AC005281.1    | -1.434 | 4.01E-11 | 6.97E-10 | 39  | 56  | 142 | 115 |
| C1orf129      | -3.501 | 4.01E-11 | 6.97E-10 | 2   | 4   | 40  | 30  |
| RP11-365D9.1  | -1.531 | 4.30E-11 | 7.41E-10 | 48  | 65  | 133 | 194 |
| HGF           | -3.176 | 4.36E-11 | 7.51E-10 | 8   | 2   | 51  | 41  |
| WBSCR27       | -1.049 | 4.58E-11 | 7.88E-10 | 106 | 109 | 223 | 222 |
| PRR15         | -1.173 | 5.09E-11 | 8.69E-10 | 62  | 82  | 169 | 156 |
| CCDC88B       | -1.171 | 5.13E-11 | 8.74E-10 | 75  | 87  | 199 | 166 |
| SYNE3         | -1.063 | 5.19E-11 | 8.84E-10 | 85  | 102 | 194 | 197 |
| CDC42BPG      | -1.417 | 6.04E-11 | 1.02E-09 | 55  | 52  | 130 | 156 |
| RP11-830F9.7  | -1.655 | 6.33E-11 | 1.06E-09 | 33  | 38  | 131 | 93  |
| CTD-2311B13.7 | -2.417 | 6.39E-11 | 1.07E-09 | 5   | 16  | 57  | 56  |
| DUX4L13       | -1.519 | 6.52E-11 | 1.09E-09 | 31  | 39  | 104 | 97  |
| C18orf56      | -1.482 | 6.71E-11 | 1.12E-09 | 65  | 48  | 165 | 151 |
| CBR3          | -1.428 | 7.67E-11 | 1.27E-09 | 41  | 44  | 118 | 111 |
| RP6-24A23.3   | -1.031 | 8.00E-11 | 1.32E-09 | 121 | 149 | 311 | 241 |

|               |        |          |          |     |     |     |     |
|---------------|--------|----------|----------|-----|-----|-----|-----|
| LHX9          | -1.032 | 8.79E-11 | 1.45E-09 | 131 | 223 | 393 | 331 |
| RAG1          | -1.793 | 9.15E-11 | 1.50E-09 | 22  | 22  | 78  | 75  |
| C3            | -1.293 | 9.94E-11 | 1.62E-09 | 45  | 63  | 138 | 127 |
| OLFM2         | -1.209 | 1.01E-10 | 1.65E-09 | 93  | 169 | 341 | 265 |
| RP11-402J6.1  | -1.048 | 1.07E-10 | 1.73E-09 | 85  | 105 | 192 | 201 |
| AGTR1         | -1.23  | 1.11E-10 | 1.78E-09 | 56  | 85  | 180 | 151 |
| RP11-17G12.2  | -1.777 | 1.11E-10 | 1.79E-09 | 21  | 27  | 74  | 91  |
| FAM198B       | -2.024 | 1.13E-10 | 1.82E-09 | 15  | 20  | 83  | 60  |
| SEMA6D        | -1.074 | 1.24E-10 | 2.00E-09 | 301 | 237 | 599 | 534 |
| RGCC          | -1.15  | 1.28E-10 | 2.05E-09 | 61  | 93  | 171 | 171 |
| RIN2          | -1.095 | 1.30E-10 | 2.08E-09 | 106 | 98  | 225 | 211 |
| PDE9A         | -1.23  | 1.31E-10 | 2.09E-09 | 88  | 82  | 181 | 218 |
| H2AFJ         | -1.041 | 1.51E-10 | 2.39E-09 | 155 | 171 | 387 | 284 |
| SYT6          | -1.196 | 1.73E-10 | 2.72E-09 | 92  | 113 | 276 | 194 |
| AGXT2L1       | -1.31  | 1.89E-10 | 2.95E-09 | 41  | 67  | 133 | 135 |
| ANGPT1        | -2.04  | 1.94E-10 | 3.01E-09 | 15  | 24  | 65  | 96  |
| ACTA2         | -1.202 | 1.98E-10 | 3.08E-09 | 77  | 75  | 164 | 186 |
| NHS           | -1.796 | 2.03E-10 | 3.15E-09 | 42  | 33  | 159 | 102 |
| WDR96         | -1.557 | 2.25E-10 | 3.46E-09 | 27  | 48  | 123 | 98  |
| LMO2          | -1.575 | 2.27E-10 | 3.49E-09 | 36  | 31  | 106 | 94  |
| HMGB1P1       | -1.631 | 2.43E-10 | 3.73E-09 | 25  | 33  | 82  | 98  |
| RP11-403I13.4 | -1.122 | 2.46E-10 | 3.77E-09 | 76  | 99  | 173 | 208 |
| CLIC5         | -1.643 | 2.74E-10 | 4.17E-09 | 20  | 41  | 100 | 91  |
| USH1C         | -1.462 | 2.94E-10 | 4.45E-09 | 32  | 59  | 116 | 135 |
| NUDT7         | -1.349 | 3.73E-10 | 5.56E-09 | 41  | 70  | 129 | 154 |
| SCIN          | -1.777 | 4.04E-10 | 5.99E-09 | 18  | 23  | 73  | 68  |
| NUDT8         | -1.117 | 4.07E-10 | 6.04E-09 | 64  | 83  | 168 | 151 |
| RP11-611D20.2 | -1.249 | 4.13E-10 | 6.11E-09 | 103 | 101 | 287 | 198 |
| MEOX1         | -1.816 | 4.17E-10 | 6.16E-09 | 17  | 32  | 100 | 73  |
| FAM220CP      | -1.415 | 4.64E-10 | 6.83E-09 | 40  | 42  | 103 | 116 |
| FRK           | -1.251 | 4.89E-10 | 7.16E-09 | 54  | 56  | 136 | 126 |
| OLFML2A       | -1.253 | 5.91E-10 | 8.60E-09 | 43  | 63  | 132 | 121 |
| CCDC151       | -1.338 | 7.02E-10 | 1.01E-08 | 103 | 80  | 264 | 199 |
| GPR12         | -2.147 | 8.96E-10 | 1.28E-08 | 8   | 16  | 55  | 52  |
| FRMPD3        | -1.645 | 9.03E-10 | 1.29E-08 | 26  | 26  | 77  | 86  |
| ARL5C         | -1.558 | 9.94E-10 | 1.41E-08 | 25  | 36  | 81  | 99  |
| RP11-666A20.4 | -1.022 | 1.02E-09 | 1.44E-08 | 114 | 106 | 231 | 216 |
| PNCK          | -1.628 | 1.07E-09 | 1.50E-08 | 29  | 32  | 110 | 79  |
| TRPA1         | -2.099 | 1.10E-09 | 1.54E-08 | 12  | 21  | 56  | 86  |
| C2CD4C        | -1.543 | 1.10E-09 | 1.55E-08 | 27  | 47  | 124 | 92  |
| KCND2         | -1.208 | 1.11E-09 | 1.56E-08 | 81  | 141 | 219 | 294 |

|               |        |          |          |     |     |     |     |
|---------------|--------|----------|----------|-----|-----|-----|-----|
| RP11-333E1.1  | -1.198 | 1.26E-09 | 1.77E-08 | 57  | 102 | 170 | 195 |
| RP11-168O16.1 | -1.477 | 1.33E-09 | 1.85E-08 | 26  | 36  | 85  | 88  |
| TCF21         | -3.222 | 1.54E-09 | 2.13E-08 | 3   | 4   | 27  | 40  |
| FBLN2         | -1.378 | 1.63E-09 | 2.23E-08 | 37  | 51  | 129 | 100 |
| ABLIM2        | -2.216 | 1.66E-09 | 2.28E-08 | 20  | 16  | 109 | 59  |
| NXNL2         | -1.673 | 1.72E-09 | 2.35E-08 | 32  | 24  | 82  | 97  |
| RP11-53O19.1  | -1.315 | 1.74E-09 | 2.38E-08 | 53  | 49  | 139 | 115 |
| RASSF9        | -1.502 | 1.96E-09 | 2.66E-08 | 24  | 38  | 83  | 93  |
| SGK223        | -1.036 | 2.03E-09 | 2.74E-08 | 83  | 91  | 169 | 188 |
| ALDH1A1       | -1.751 | 2.04E-09 | 2.75E-08 | 24  | 24  | 69  | 93  |
| FAM167A       | -1.384 | 2.27E-09 | 3.04E-08 | 78  | 59  | 203 | 155 |
| DKK3          | -1.285 | 2.39E-09 | 3.19E-08 | 50  | 80  | 136 | 181 |
| TLCD2         | -1.274 | 2.48E-09 | 3.29E-08 | 88  | 69  | 174 | 206 |
| AC073043.2    | -1.226 | 2.59E-09 | 3.43E-08 | 63  | 57  | 148 | 133 |
| RP11-761I4.3  | -1.235 | 2.61E-09 | 3.45E-08 | 41  | 60  | 123 | 115 |
| SLCO2A1       | -3.385 | 2.86E-09 | 3.77E-08 | 7   | 0   | 32  | 43  |
| ADAMTSL1      | -2.182 | 3.00E-09 | 3.95E-08 | 8   | 13  | 53  | 43  |
| CLEC4F        | -1.535 | 3.13E-09 | 4.10E-08 | 22  | 41  | 85  | 98  |
| DNAJC27-AS1   | -2.078 | 3.42E-09 | 4.45E-08 | 11  | 13  | 47  | 55  |
| TMEM198B      | -1.135 | 3.48E-09 | 4.51E-08 | 125 | 98  | 235 | 255 |
| ANKRD19P      | -1.115 | 3.54E-09 | 4.59E-08 | 64  | 67  | 148 | 136 |
| RP11-313D6.4  | -1.307 | 4.22E-09 | 5.40E-08 | 37  | 51  | 101 | 117 |
| CHRD          | -1.195 | 4.28E-09 | 5.47E-08 | 44  | 59  | 118 | 118 |
| GDNF-AS1      | -1.778 | 4.33E-09 | 5.53E-08 | 50  | 28  | 154 | 114 |
| C9orf106      | -2.067 | 5.08E-09 | 6.42E-08 | 12  | 11  | 50  | 47  |
| DIRC3         | -1.177 | 5.42E-09 | 6.82E-08 | 49  | 61  | 134 | 115 |
| COL9A3        | -1.431 | 5.83E-09 | 7.32E-08 | 62  | 58  | 198 | 126 |
| SFRP4         | -2.533 | 6.05E-09 | 7.58E-08 | 6   | 8   | 48  | 34  |
| ELFN2         | -1.223 | 6.65E-09 | 8.26E-08 | 46  | 70  | 152 | 119 |
| RILP          | -1.214 | 7.41E-09 | 9.13E-08 | 82  | 105 | 265 | 169 |
| SALL4         | -1.059 | 7.69E-09 | 9.47E-08 | 77  | 75  | 159 | 158 |
| C20orf96      | -1.1   | 8.49E-09 | 1.04E-07 | 62  | 117 | 192 | 192 |
| SLC35D3       | -1.743 | 8.50E-09 | 1.04E-07 | 14  | 22  | 61  | 60  |
| AC079776.7    | -2.193 | 8.56E-09 | 1.05E-07 | 12  | 13  | 44  | 71  |
| AC105020.1    | -1.624 | 9.44E-09 | 1.15E-07 | 18  | 25  | 67  | 66  |
| MYOM2         | -1.092 | 1.03E-08 | 1.25E-07 | 72  | 85  | 191 | 144 |
| XKR5          | -1.535 | 1.20E-08 | 1.44E-07 | 18  | 35  | 76  | 78  |
| CT476828.12   | -2.064 | 1.21E-08 | 1.45E-07 | 14  | 10  | 52  | 49  |
| MAF           | -1.185 | 1.23E-08 | 1.47E-07 | 65  | 69  | 176 | 129 |
| SECTM1        | -1.109 | 1.47E-08 | 1.74E-07 | 49  | 64  | 121 | 123 |
| MYOD1         | -1.591 | 1.50E-08 | 1.77E-07 | 20  | 24  | 69  | 64  |

|               |        |          |          |     |    |     |     |
|---------------|--------|----------|----------|-----|----|-----|-----|
| NOTUM         | -1.699 | 1.54E-08 | 1.81E-07 | 29  | 22 | 97  | 69  |
| UGT2B4        | -2.139 | 1.55E-08 | 1.82E-07 | 15  | 8  | 53  | 49  |
| FAM159B       | -1.438 | 1.66E-08 | 1.94E-07 | 28  | 35 | 77  | 94  |
| FAM123A       | -1.868 | 1.69E-08 | 1.98E-07 | 11  | 22 | 53  | 68  |
| CCM2L         | -3.663 | 1.78E-08 | 2.07E-07 | 1   | 3  | 19  | 34  |
| FOXL1         | -1.539 | 1.84E-08 | 2.14E-07 | 49  | 30 | 121 | 109 |
| PPP1R14A      | -1.083 | 1.98E-08 | 2.29E-07 | 51  | 66 | 127 | 121 |
| NEGR1         | -1.029 | 2.13E-08 | 2.44E-07 | 58  | 87 | 145 | 151 |
| FAM131B       | -2.139 | 2.13E-08 | 2.44E-07 | 14  | 9  | 58  | 44  |
| KLHL32        | -1.143 | 2.20E-08 | 2.52E-07 | 118 | 96 | 208 | 265 |
| CFHR1         | -1.936 | 2.49E-08 | 2.82E-07 | 11  | 21 | 50  | 73  |
| COL4A3        | -1.433 | 2.65E-08 | 2.99E-07 | 23  | 48 | 90  | 102 |
| RP11-806O11.1 | -1.387 | 2.72E-08 | 3.06E-07 | 24  | 47 | 97  | 89  |
| RFX6          | -1.704 | 3.06E-08 | 3.42E-07 | 13  | 24 | 58  | 63  |
| FBXL16        | -1.08  | 3.21E-08 | 3.59E-07 | 70  | 68 | 159 | 133 |
| RNF175        | -1.497 | 3.56E-08 | 3.95E-07 | 19  | 34 | 79  | 71  |
| ATOH1         | -1.942 | 3.72E-08 | 4.11E-07 | 13  | 16 | 67  | 45  |
| SOCS3         | -1.24  | 4.06E-08 | 4.46E-07 | 48  | 45 | 120 | 100 |
| RP11-490M8.1  | -1.794 | 4.10E-08 | 4.49E-07 | 13  | 18 | 51  | 57  |
| AC012123.1    | -1.442 | 4.66E-08 | 5.05E-07 | 36  | 29 | 82  | 95  |
| AC068057.1    | -2.777 | 4.70E-08 | 5.08E-07 | 4   | 4  | 30  | 26  |
| CXCL3         | -1.551 | 4.96E-08 | 5.33E-07 | 22  | 27 | 82  | 62  |
| ACPP          | -3.521 | 4.99E-08 | 5.36E-07 | 2   | 2  | 22  | 26  |
| ADRB2         | -1.155 | 5.15E-08 | 5.53E-07 | 47  | 49 | 111 | 103 |
| DUX4L6        | -2.093 | 5.19E-08 | 5.57E-07 | 11  | 9  | 44  | 42  |
| ABCB4         | -1.279 | 5.27E-08 | 5.65E-07 | 29  | 57 | 106 | 103 |
| TMEM178A      | -1.08  | 5.46E-08 | 5.82E-07 | 51  | 70 | 119 | 137 |
| NMNAT3        | -1.069 | 5.47E-08 | 5.83E-07 | 66  | 64 | 145 | 128 |
| TGM2          | -1.813 | 6.00E-08 | 6.35E-07 | 14  | 24 | 53  | 81  |
| PTPN5         | -1.854 | 6.23E-08 | 6.59E-07 | 15  | 15 | 63  | 46  |
| ST8SIA1       | -1.206 | 6.31E-08 | 6.66E-07 | 34  | 50 | 95  | 99  |
| C17orf72      | -1.801 | 6.40E-08 | 6.75E-07 | 10  | 22 | 51  | 61  |
| ENPP3         | -3.279 | 6.44E-08 | 6.78E-07 | 3   | 3  | 20  | 40  |
| AC007255.8    | -2.166 | 6.61E-08 | 6.94E-07 | 5   | 12 | 38  | 39  |
| C8orf73       | -1.133 | 6.82E-08 | 7.16E-07 | 51  | 51 | 108 | 116 |
| GRID2IP       | -1.435 | 7.00E-08 | 7.34E-07 | 20  | 35 | 73  | 76  |
| MATN1-AS1     | -1.263 | 7.05E-08 | 7.39E-07 | 32  | 60 | 102 | 119 |
| INSC          | -1.395 | 7.34E-08 | 7.67E-07 | 23  | 40 | 91  | 75  |
| FAM26E        | -3.911 | 8.60E-08 | 8.87E-07 | 2   | 2  | 18  | 45  |
| RP11-42I10.1  | -2.345 | 8.81E-08 | 9.06E-07 | 8   | 7  | 32  | 45  |
| CT476828.13   | -1.93  | 8.98E-08 | 9.22E-07 | 8   | 16 | 47  | 45  |

|               |        |          |          |     |     |     |     |
|---------------|--------|----------|----------|-----|-----|-----|-----|
| CSRP1         | -1.866 | 9.07E-08 | 9.30E-07 | 40  | 18  | 94  | 118 |
| RP11-61L23.2  | -1.338 | 9.21E-08 | 9.45E-07 | 30  | 32  | 82  | 75  |
| BCL11B        | -1.62  | 9.53E-08 | 9.75E-07 | 91  | 51  | 265 | 172 |
| CXCL12        | -1.165 | 1.04E-07 | 1.05E-06 | 123 | 103 | 305 | 202 |
| OLFML2B       | -1.179 | 1.06E-07 | 1.08E-06 | 37  | 49  | 105 | 90  |
| POM121L2      | -3.017 | 1.07E-07 | 1.08E-06 | 2   | 4   | 22  | 28  |
| SEPP1         | -1.268 | 1.08E-07 | 1.09E-06 | 32  | 58  | 122 | 95  |
| KNDC1         | -1.609 | 1.15E-07 | 1.16E-06 | 14  | 37  | 86  | 70  |
| CTB-52I2.8    | -1.005 | 1.40E-07 | 1.39E-06 | 59  | 66  | 132 | 119 |
| PRR16         | -1.08  | 1.40E-07 | 1.39E-06 | 70  | 112 | 228 | 157 |
| XX-2136C48.9  | -1.481 | 1.41E-07 | 1.40E-06 | 26  | 33  | 99  | 66  |
| DUX4L2        | -1.73  | 1.41E-07 | 1.40E-06 | 13  | 17  | 50  | 50  |
| RASA4CP       | -1.063 | 1.42E-07 | 1.41E-06 | 91  | 74  | 186 | 159 |
| RP11-115D19.1 | -1.264 | 1.46E-07 | 1.45E-06 | 43  | 36  | 95  | 95  |
| PAX2          | -1.593 | 1.54E-07 | 1.52E-06 | 16  | 21  | 58  | 54  |
| RNA5SP93      | -3.459 | 1.54E-07 | 1.52E-06 | 2   | 2   | 20  | 26  |
| AP003774.4    | -3.416 | 1.57E-07 | 1.54E-06 | 4   | 2   | 46  | 20  |
| LIPH          | -1.694 | 1.77E-07 | 1.73E-06 | 11  | 21  | 54  | 50  |
| CTD-3105H18.8 | -1.379 | 1.85E-07 | 1.80E-06 | 32  | 34  | 73  | 99  |
| HECW1         | -1.418 | 1.99E-07 | 1.92E-06 | 21  | 44  | 99  | 75  |
| SPATA6L       | -1.01  | 2.01E-07 | 1.94E-06 | 55  | 75  | 144 | 118 |
| TTLL1         | -1.074 | 2.02E-07 | 1.94E-06 | 42  | 60  | 112 | 103 |
| RP11-680F8.1  | -1.036 | 2.04E-07 | 1.96E-06 | 46  | 68  | 122 | 112 |
| AP003068.23   | -1.233 | 2.05E-07 | 1.97E-06 | 36  | 43  | 83  | 103 |
| FER1L4        | -1.125 | 2.05E-07 | 1.97E-06 | 66  | 104 | 150 | 221 |
| VN1R20P       | -7.375 | 2.22E-07 | 2.12E-06 | 0   | 0   | 11  | 22  |
| KB-431C1.4    | -1.464 | 2.23E-07 | 2.13E-06 | 59  | 34  | 139 | 118 |
| TMEM155       | -1.203 | 2.25E-07 | 2.15E-06 | 63  | 65  | 179 | 116 |
| GHR           | -1.218 | 2.28E-07 | 2.17E-06 | 29  | 56  | 100 | 98  |
| NIPSNAP3B     | -1.291 | 2.39E-07 | 2.28E-06 | 31  | 40  | 100 | 74  |
| NPFFR2        | -2.005 | 2.45E-07 | 2.33E-06 | 5   | 23  | 61  | 52  |
| RP11-345F18.1 | -1.815 | 2.47E-07 | 2.35E-06 | 9   | 17  | 44  | 48  |
| CT476828.10   | -1.779 | 2.50E-07 | 2.37E-06 | 17  | 12  | 48  | 52  |
| RP11-458I7.1  | -1.024 | 2.55E-07 | 2.42E-06 | 55  | 58  | 117 | 113 |
| AC009831.1    | -1.866 | 2.72E-07 | 2.56E-06 | 10  | 14  | 40  | 48  |
| EBF2          | -1.448 | 2.75E-07 | 2.59E-06 | 75  | 44  | 186 | 139 |
| CT476828.3    | -1.846 | 2.75E-07 | 2.59E-06 | 15  | 11  | 47  | 47  |
| AC073109.2    | -3.608 | 2.86E-07 | 2.69E-06 | 2   | 2   | 17  | 34  |
| KREMEN2       | -1.282 | 2.87E-07 | 2.69E-06 | 57  | 49  | 154 | 104 |
| CXCL6         | -1.833 | 2.96E-07 | 2.77E-06 | 10  | 14  | 45  | 41  |
| RP11-1C8.4    | -1.145 | 3.00E-07 | 2.80E-06 | 40  | 44  | 94  | 92  |

|                |        |          |          |    |     |     |     |
|----------------|--------|----------|----------|----|-----|-----|-----|
| SYNPO2         | -1.045 | 3.02E-07 | 2.82E-06 | 42 | 64  | 112 | 107 |
| WNT2           | -2.395 | 3.06E-07 | 2.86E-06 | 7  | 9   | 56  | 29  |
| AC135983.1     | -1.005 | 3.07E-07 | 2.86E-06 | 49 | 77  | 122 | 131 |
| FAM90A12P      | -1.984 | 3.36E-07 | 3.11E-06 | 17 | 19  | 97  | 46  |
| RP11-1114A5.4  | -1.124 | 3.37E-07 | 3.11E-06 | 69 | 135 | 185 | 260 |
| PIGZ           | -1.377 | 3.37E-07 | 3.11E-06 | 29 | 29  | 84  | 67  |
| CFH            | -1.678 | 3.70E-07 | 3.39E-06 | 15 | 18  | 47  | 59  |
| RP11-81N13.1   | -1.081 | 3.72E-07 | 3.41E-06 | 40 | 71  | 125 | 110 |
| RP11-433A10.1  | -1.739 | 4.15E-07 | 3.78E-06 | 25 | 18  | 56  | 88  |
| FMO6P          | -2.327 | 4.34E-07 | 3.94E-06 | 5  | 7   | 28  | 33  |
| AMBN           | -1.076 | 4.91E-07 | 4.42E-06 | 40 | 51  | 98  | 94  |
| CTD-2206N4.4   | -1.358 | 5.02E-07 | 4.51E-06 | 23 | 28  | 67  | 64  |
| HS3ST5         | -1.725 | 5.23E-07 | 4.70E-06 | 10 | 18  | 49  | 44  |
| RP11-771K4.1   | -2.234 | 5.51E-07 | 4.93E-06 | 6  | 10  | 47  | 29  |
| DUX4L15        | -1.545 | 5.57E-07 | 4.97E-06 | 18 | 23  | 70  | 50  |
| RP11-307C12.11 | -1.146 | 5.68E-07 | 5.05E-06 | 42 | 65  | 139 | 98  |
| EMID2          | -1.159 | 5.73E-07 | 5.09E-06 | 60 | 149 | 245 | 222 |
| FOXQ1          | -1.467 | 5.83E-07 | 5.17E-06 | 23 | 21  | 57  | 65  |
| APLN           | -1.82  | 5.95E-07 | 5.27E-06 | 11 | 37  | 105 | 65  |
| RP3-525N10.2   | -2.085 | 6.11E-07 | 5.39E-06 | 12 | 6   | 38  | 39  |
| PRPH           | -1.066 | 6.24E-07 | 5.50E-06 | 39 | 65  | 117 | 101 |
| BCAS4          | -1.309 | 6.25E-07 | 5.50E-06 | 24 | 32  | 75  | 64  |
| RP11-63P12.6   | -1.319 | 6.45E-07 | 5.67E-06 | 24 | 42  | 72  | 93  |
| AC011841.1     | -1.69  | 7.11E-07 | 6.22E-06 | 11 | 18  | 44  | 50  |
| LPPR5          | -1.474 | 7.15E-07 | 6.26E-06 | 30 | 21  | 67  | 75  |
| STX11          | -1.271 | 7.45E-07 | 6.49E-06 | 26 | 63  | 110 | 105 |
| CT476828.11    | -1.713 | 7.48E-07 | 6.52E-06 | 12 | 15  | 43  | 46  |
| RNF144A-AS1    | -1.75  | 7.67E-07 | 6.66E-06 | 14 | 15  | 41  | 57  |
| CDNF           | -1.306 | 7.73E-07 | 6.71E-06 | 26 | 39  | 69  | 92  |
| DKK1           | -1.406 | 7.87E-07 | 6.82E-06 | 30 | 48  | 131 | 76  |
| AC131097.3     | -2.654 | 7.99E-07 | 6.91E-06 | 2  | 8   | 41  | 23  |
| TNS1           | -1.382 | 8.06E-07 | 6.96E-06 | 36 | 31  | 104 | 71  |
| PDCL3P4        | -1.074 | 8.37E-07 | 7.20E-06 | 44 | 58  | 95  | 120 |
| SRPX           | -2.195 | 8.65E-07 | 7.43E-06 | 6  | 10  | 29  | 45  |
| GCNT4          | -1.272 | 9.34E-07 | 7.99E-06 | 23 | 51  | 92  | 87  |
| RP11-293M10.6  | -1.223 | 9.42E-07 | 8.04E-06 | 51 | 38  | 113 | 95  |
| PTGDS          | -1.991 | 9.57E-07 | 8.16E-06 | 18 | 7   | 47  | 53  |
| OTOG           | -2.402 | 9.70E-07 | 8.26E-06 | 2  | 9   | 28  | 31  |
| DUX4L4         | -1.624 | 9.98E-07 | 8.45E-06 | 16 | 15  | 46  | 50  |
| RP11-328M4.2   | -1.204 | 1.01E-06 | 8.55E-06 | 50 | 38  | 108 | 95  |
| LCP1           | -1.955 | 1.03E-06 | 8.73E-06 | 12 | 17  | 75  | 38  |

|               |        |          |          |    |    |     |     |
|---------------|--------|----------|----------|----|----|-----|-----|
| RP13-401N8.1  | -1.105 | 1.07E-06 | 9.07E-06 | 52 | 52 | 97  | 127 |
| CTD-2349P21.6 | -1.041 | 1.12E-06 | 9.39E-06 | 56 | 96 | 133 | 180 |
| CACNA1G       | -1.297 | 1.20E-06 | 1.00E-05 | 26 | 28 | 65  | 68  |
| SCN3A         | -1.153 | 1.26E-06 | 1.05E-05 | 35 | 40 | 76  | 91  |
| DUX4L5        | -1.697 | 1.27E-06 | 1.06E-05 | 14 | 13 | 47  | 41  |
| AC140061.9    | -1.45  | 1.32E-06 | 1.10E-05 | 24 | 22 | 55  | 71  |
| ARHGAP23      | -1.233 | 1.35E-06 | 1.12E-05 | 27 | 35 | 79  | 67  |
| RASGEF1C      | -1.168 | 1.36E-06 | 1.12E-05 | 28 | 40 | 80  | 73  |
| HTR1D         | -1.152 | 1.37E-06 | 1.13E-05 | 38 | 87 | 129 | 149 |
| RP11-44F21.3  | -1.084 | 1.39E-06 | 1.15E-05 | 53 | 45 | 102 | 106 |
| DSCR6         | -1.373 | 1.40E-06 | 1.15E-05 | 40 | 39 | 129 | 76  |
| CTD-2536I1.1  | -1.405 | 1.45E-06 | 1.19E-05 | 30 | 22 | 73  | 65  |
| ARMC3         | -1.632 | 1.46E-06 | 1.20E-05 | 20 | 16 | 47  | 65  |
| COL23A1       | -1.569 | 1.48E-06 | 1.21E-05 | 24 | 18 | 73  | 52  |
| SLC25A48      | -1.116 | 1.49E-06 | 1.22E-05 | 34 | 48 | 81  | 97  |
| NTNG2         | -1.886 | 1.61E-06 | 1.32E-05 | 16 | 12 | 65  | 39  |
| GREM1         | -2.65  | 1.63E-06 | 1.33E-05 | 2  | 5  | 22  | 23  |
| DUX4L3        | -1.645 | 1.67E-06 | 1.36E-05 | 12 | 16 | 43  | 45  |
| PDE1B         | -1.013 | 1.73E-06 | 1.41E-05 | 43 | 56 | 93  | 107 |
| RP11-360O19.4 | -2.327 | 1.74E-06 | 1.41E-05 | 2  | 10 | 36  | 25  |
| LINC00403     | -1.534 | 1.77E-06 | 1.44E-05 | 22 | 20 | 51  | 71  |
| RP11-315O6.1  | -2.559 | 1.79E-06 | 1.45E-05 | 5  | 4  | 34  | 20  |
| CT476828.4    | -1.643 | 1.81E-06 | 1.46E-05 | 16 | 13 | 46  | 45  |
| KIAA1211L     | -1.187 | 1.82E-06 | 1.47E-05 | 26 | 38 | 77  | 69  |
| RP11-24M17.7  | -1.22  | 1.83E-06 | 1.48E-05 | 26 | 37 | 66  | 81  |
| IDH1-AS1      | -1.773 | 1.85E-06 | 1.49E-05 | 20 | 10 | 52  | 51  |
| RP11-392A22.2 | -1.5   | 1.88E-06 | 1.52E-05 | 14 | 23 | 58  | 47  |
| RP11-553L6.5  | -1.382 | 1.94E-06 | 1.56E-05 | 18 | 31 | 56  | 72  |
| C5            | -1.046 | 1.99E-06 | 1.60E-05 | 36 | 54 | 95  | 91  |
| TTLL6         | -1.437 | 2.00E-06 | 1.61E-05 | 19 | 30 | 54  | 79  |
| RBM24         | -1.764 | 2.02E-06 | 1.62E-05 | 8  | 16 | 38  | 44  |
| ADSSL1        | -1.037 | 2.09E-06 | 1.67E-05 | 35 | 57 | 94  | 95  |
| RP1-67M12.2   | -4     | 2.20E-06 | 1.75E-05 | 0  | 2  | 22  | 13  |
| TMEM169       | -1.027 | 2.23E-06 | 1.77E-05 | 37 | 65 | 110 | 98  |
| FLJ22184      | -1.411 | 2.27E-06 | 1.80E-05 | 20 | 25 | 52  | 68  |
| CNTN5         | -1.181 | 2.27E-06 | 1.80E-05 | 27 | 47 | 75  | 93  |
| STAB1         | -1.193 | 2.28E-06 | 1.81E-05 | 29 | 40 | 90  | 68  |
| CTD-2325P2.3  | -2.877 | 2.28E-06 | 1.81E-05 | 2  | 3  | 20  | 18  |
| ZBBX          | -1.237 | 2.30E-06 | 1.82E-05 | 43 | 32 | 84  | 93  |
| NMRK2         | -2.44  | 2.34E-06 | 1.85E-05 | 10 | 2  | 34  | 32  |
| CT476828.9    | -1.664 | 2.51E-06 | 1.97E-05 | 13 | 14 | 39  | 47  |



|               |        |          |          |    |    |     |     |
|---------------|--------|----------|----------|----|----|-----|-----|
| RP11-16E12.1  | -2.834 | 2.57E-06 | 2.02E-05 | 1  | 5  | 18  | 26  |
| SLC2A1-AS1    | -1.021 | 2.66E-06 | 2.09E-05 | 47 | 49 | 106 | 89  |
| RP5-1109J22.1 | -1.279 | 2.76E-06 | 2.15E-05 | 21 | 44 | 89  | 69  |
| RP11-685M7.3  | -1.318 | 2.86E-06 | 2.23E-05 | 23 | 25 | 57  | 63  |
| CT476828.8    | -1.611 | 2.91E-06 | 2.26E-05 | 15 | 14 | 48  | 41  |
| CRIP3         | -1.765 | 2.93E-06 | 2.28E-05 | 16 | 18 | 41  | 75  |
| DCN           | -1.522 | 2.93E-06 | 2.28E-05 | 18 | 16 | 47  | 51  |
| KLRC4         | -1.367 | 2.93E-06 | 2.28E-05 | 20 | 26 | 53  | 66  |
| FBLL1         | -1.556 | 2.95E-06 | 2.29E-05 | 20 | 20 | 72  | 46  |
| RP11-241F15.1 | -1.088 | 3.22E-06 | 2.49E-05 | 46 | 48 | 115 | 85  |
| LINC00473     | -1.889 | 3.22E-06 | 2.49E-05 | 8  | 14 | 32  | 50  |
| ABCD2         | -1.128 | 3.36E-06 | 2.59E-05 | 27 | 42 | 75  | 76  |
| VGLL2         | -1.116 | 3.40E-06 | 2.62E-05 | 29 | 41 | 73  | 79  |
| AC079341.1    | -2.697 | 3.41E-06 | 2.62E-05 | 2  | 4  | 20  | 20  |
| C10orf54      | -1.818 | 3.67E-06 | 2.80E-05 | 7  | 13 | 33  | 38  |
| DAND5         | -2.914 | 3.88E-06 | 2.96E-05 | 0  | 5  | 19  | 20  |
| COL13A1       | -1.07  | 3.94E-06 | 2.99E-05 | 80 | 68 | 186 | 125 |
| AC104655.3    | -1.85  | 3.95E-06 | 3.00E-05 | 6  | 13 | 37  | 32  |
| CSDC2         | -1.025 | 4.10E-06 | 3.11E-05 | 56 | 51 | 122 | 96  |
| RP1-151F17.1  | -1.189 | 4.21E-06 | 3.17E-05 | 27 | 40 | 88  | 65  |
| RASL10A       | -1.055 | 4.25E-06 | 3.20E-05 | 90 | 62 | 154 | 162 |
| MDH1B         | -1.049 | 4.27E-06 | 3.22E-05 | 53 | 46 | 95  | 110 |
| DYNC111       | -1.084 | 4.49E-06 | 3.37E-05 | 41 | 41 | 79  | 95  |
| HTR6          | -1.841 | 4.52E-06 | 3.39E-05 | 7  | 11 | 35  | 30  |
| CT476828.7    | -1.579 | 4.63E-06 | 3.47E-05 | 17 | 13 | 45  | 45  |
| GAPDHP21      | -1.026 | 4.89E-06 | 3.65E-05 | 55 | 76 | 107 | 160 |
| TJP3          | -1.208 | 5.13E-06 | 3.80E-05 | 24 | 30 | 65  | 60  |
| LINC00341     | -1.186 | 5.32E-06 | 3.93E-05 | 22 | 46 | 75  | 80  |
| DUX4L10       | -1.546 | 5.52E-06 | 4.07E-05 | 14 | 16 | 41  | 47  |
| TCN2          | -1.287 | 5.60E-06 | 4.12E-05 | 20 | 27 | 55  | 60  |
| OPRL1         | -1.154 | 5.67E-06 | 4.17E-05 | 25 | 36 | 69  | 67  |
| RP11-447H19.3 | -2.084 | 5.79E-06 | 4.26E-05 | 6  | 8  | 25  | 35  |
| CALY          | -1.165 | 5.97E-06 | 4.37E-05 | 23 | 38 | 73  | 64  |
| PITX3         | -1.418 | 6.03E-06 | 4.42E-05 | 36 | 20 | 75  | 75  |
| RP11-449H11.1 | -1.123 | 6.07E-06 | 4.44E-05 | 27 | 45 | 73  | 84  |
| TNFSF4        | -1.385 | 6.09E-06 | 4.45E-05 | 22 | 20 | 51  | 59  |
| ZMAT1         | -2.193 | 6.10E-06 | 4.46E-05 | 5  | 6  | 25  | 26  |
| IGBP1P1       | -1.627 | 6.21E-06 | 4.53E-05 | 15 | 14 | 53  | 37  |
| CTC-459M5.1   | -1.788 | 6.52E-06 | 4.74E-05 | 9  | 12 | 43  | 30  |
| TRPC4         | -1.641 | 6.80E-06 | 4.92E-05 | 14 | 16 | 37  | 57  |
| KCNK13        | -1.014 | 6.98E-06 | 5.05E-05 | 42 | 48 | 102 | 80  |

|                |        |          |          |    |    |     |     |
|----------------|--------|----------|----------|----|----|-----|-----|
| RP11-61J19.4   | -1.134 | 7.17E-06 | 5.17E-05 | 40 | 36 | 74  | 93  |
| TEPP           | -1.092 | 7.40E-06 | 5.32E-05 | 27 | 55 | 86  | 89  |
| CRB1           | -1.465 | 7.79E-06 | 5.56E-05 | 17 | 43 | 65  | 101 |
| STRA6          | -1.545 | 8.03E-06 | 5.72E-05 | 23 | 31 | 107 | 51  |
| IKZF1          | -1.43  | 8.12E-06 | 5.78E-05 | 19 | 18 | 55  | 45  |
| ZMYND15        | -3.375 | 8.33E-06 | 5.92E-05 | 0  | 3  | 21  | 12  |
| FNDC1          | -1.659 | 8.35E-06 | 5.93E-05 | 15 | 14 | 36  | 56  |
| SLC2A14        | -1.105 | 9.37E-06 | 6.59E-05 | 37 | 34 | 72  | 81  |
| CTD-3105H18.11 | -1.046 | 9.40E-06 | 6.61E-05 | 30 | 44 | 75  | 78  |
| RASAL1         | -4.155 | 9.72E-06 | 6.82E-05 | 2  | 0  | 29  | 10  |
| C1orf147       | -1.948 | 9.88E-06 | 6.91E-05 | 6  | 12 | 26  | 44  |
| ISM2           | -1.047 | 1.00E-05 | 6.99E-05 | 48 | 40 | 93  | 89  |
| CNFN           | -1.067 | 1.06E-05 | 7.34E-05 | 66 | 69 | 177 | 106 |
| RP11-317J10.2  | -2.623 | 1.07E-05 | 7.43E-05 | 1  | 5  | 19  | 19  |
| GAL3ST1        | -1.122 | 1.09E-05 | 7.56E-05 | 27 | 34 | 63  | 70  |
| RP11-573I11.2  | -2.108 | 1.11E-05 | 7.72E-05 | 7  | 7  | 23  | 38  |
| ZDHHC19        | -2.504 | 1.12E-05 | 7.78E-05 | 4  | 5  | 35  | 17  |
| CHST13         | -2.799 | 1.14E-05 | 7.85E-05 | 1  | 4  | 15  | 21  |
| HES2           | -1.436 | 1.15E-05 | 7.91E-05 | 26 | 16 | 61  | 53  |
| FMO3           | -1.87  | 1.15E-05 | 7.92E-05 | 5  | 11 | 27  | 32  |
| RP11-174O3.3   | -1.894 | 1.24E-05 | 8.51E-05 | 6  | 10 | 33  | 27  |
| RXRG           | -1.931 | 1.26E-05 | 8.62E-05 | 4  | 15 | 30  | 43  |
| PMP2           | -2.279 | 1.26E-05 | 8.67E-05 | 7  | 5  | 39  | 20  |
| RP11-315I14.5  | -1.033 | 1.37E-05 | 9.35E-05 | 58 | 47 | 96  | 119 |
| FGD5           | -1.079 | 1.38E-05 | 9.43E-05 | 27 | 42 | 79  | 67  |
| ATP8B3         | -1.524 | 1.40E-05 | 9.51E-05 | 19 | 16 | 61  | 40  |
| OGFR-AS1       | -1.615 | 1.40E-05 | 9.57E-05 | 12 | 13 | 33  | 44  |
| RP11-192P9.1   | -1.67  | 1.41E-05 | 9.59E-05 | 8  | 17 | 34  | 46  |
| CT476828.5     | -1.513 | 1.47E-05 | 9.98E-05 | 15 | 15 | 38  | 48  |
| SNCB           | -1.11  | 1.53E-05 | 0.000103 | 80 | 64 | 193 | 118 |
| CTD-2267D19.2  | -1.117 | 1.60E-05 | 0.000108 | 25 | 33 | 64  | 62  |
| FAM179A        | -1.688 | 1.64E-05 | 0.00011  | 16 | 9  | 38  | 43  |
| GDF15          | -1.68  | 1.64E-05 | 0.00011  | 20 | 12 | 63  | 40  |
| TP53TG3B       | -1.746 | 1.65E-05 | 0.000111 | 14 | 10 | 33  | 48  |
| RP11-610P16.1  | -1.17  | 1.66E-05 | 0.000111 | 54 | 37 | 89  | 116 |
| AP000351.10    | -6.728 | 1.75E-05 | 0.000117 | 0  | 0  | 9   | 12  |
| CTD-2270N23.1  | -1.371 | 1.81E-05 | 0.000121 | 30 | 24 | 87  | 53  |
| SLC22A31       | -1.658 | 1.82E-05 | 0.000122 | 12 | 11 | 33  | 40  |
| LPA            | -7.651 | 1.83E-05 | 0.000122 | 0  | 0  | 0   | 40  |
| WDR63          | -1.279 | 1.85E-05 | 0.000123 | 26 | 81 | 118 | 142 |
| DLGAP1-AS1     | -1.49  | 1.92E-05 | 0.000128 | 14 | 14 | 38  | 41  |

|               |        |          |          |    |    |     |     |
|---------------|--------|----------|----------|----|----|-----|-----|
| DOK7          | -1.295 | 1.99E-05 | 0.000132 | 16 | 23 | 47  | 49  |
| STC1          | -1.486 | 2.06E-05 | 0.000136 | 15 | 17 | 53  | 37  |
| FMO2          | -1.842 | 2.09E-05 | 0.000138 | 16 | 7  | 49  | 34  |
| RP11-410L14.2 | -1.268 | 2.10E-05 | 0.000138 | 18 | 23 | 48  | 51  |
| LRRC9         | -1.039 | 2.25E-05 | 0.000147 | 39 | 49 | 74  | 107 |
| LRRC17        | -1.211 | 2.27E-05 | 0.000148 | 39 | 27 | 69  | 84  |
| PZP           | -2.661 | 2.31E-05 | 0.000151 | 2  | 4  | 14  | 25  |
| BCMO1         | -2.585 | 2.46E-05 | 0.000159 | 6  | 1  | 22  | 21  |
| SLC5A12       | -1.059 | 2.46E-05 | 0.00016  | 34 | 35 | 79  | 65  |
| RP11-881M11.2 | -1.067 | 2.49E-05 | 0.000161 | 29 | 32 | 63  | 65  |
| DHDH          | -1.404 | 2.63E-05 | 0.000169 | 13 | 19 | 42  | 43  |
| RP11-60I3.5   | -1.577 | 2.63E-05 | 0.00017  | 9  | 14 | 36  | 33  |
| HAPLN2        | -1.709 | 2.65E-05 | 0.000171 | 20 | 8  | 44  | 48  |
| AC093818.1    | -1.008 | 2.69E-05 | 0.000173 | 30 | 38 | 71  | 66  |
| FAM189A2      | -1.27  | 2.70E-05 | 0.000174 | 21 | 27 | 48  | 68  |
| TMEM221       | -1.091 | 2.71E-05 | 0.000174 | 26 | 41 | 62  | 81  |
| RP1-125I3.4   | -2.551 | 2.75E-05 | 0.000176 | 0  | 7  | 23  | 19  |
| LINC00308     | -1.41  | 2.76E-05 | 0.000177 | 13 | 23 | 40  | 56  |
| GPNMB         | -1.208 | 2.79E-05 | 0.000179 | 27 | 27 | 53  | 72  |
| CTD-2058B24.2 | -2.282 | 3.02E-05 | 0.000192 | 2  | 11 | 21  | 43  |
| RP11-390G14.1 | -1.53  | 3.14E-05 | 0.000199 | 12 | 18 | 53  | 34  |
| MMP2          | -1.047 | 3.28E-05 | 0.000207 | 38 | 35 | 84  | 67  |
| POU4F2        | -1.557 | 3.29E-05 | 0.000208 | 27 | 15 | 49  | 75  |
| RAPGEF4-AS1   | -1.341 | 3.49E-05 | 0.00022  | 17 | 18 | 44  | 45  |
| FGL1          | -1.932 | 3.50E-05 | 0.00022  | 4  | 10 | 24  | 30  |
| BAI1          | -1.077 | 3.54E-05 | 0.000222 | 64 | 61 | 168 | 96  |
| PCOLCE-AS1    | -1.491 | 3.71E-05 | 0.000232 | 10 | 29 | 66  | 44  |
| RP11-383H13.1 | -1.324 | 3.72E-05 | 0.000233 | 22 | 29 | 81  | 47  |
| KLRC1         | -2.27  | 3.83E-05 | 0.000238 | 2  | 8  | 19  | 30  |
| GRM4          | -1.75  | 3.83E-05 | 0.000238 | 10 | 8  | 34  | 27  |
| AC147651.3    | -1.415 | 3.84E-05 | 0.000239 | 17 | 14 | 40  | 43  |
| PCDH8         | -1.295 | 3.90E-05 | 0.000242 | 13 | 26 | 48  | 48  |
| CT476828.6    | -1.729 | 3.96E-05 | 0.000246 | 17 | 7  | 38  | 42  |
| FAM163A       | -1.134 | 4.00E-05 | 0.000248 | 22 | 28 | 56  | 54  |
| C20orf166-AS1 | -1.748 | 4.02E-05 | 0.000249 | 12 | 9  | 43  | 28  |
| TYRP1         | -2.585 | 4.03E-05 | 0.00025  | 4  | 2  | 20  | 17  |
| CTD-2281M20.1 | -6.728 | 4.09E-05 | 0.000253 | 0  | 0  | 7   | 14  |
| CT476828.14   | -1.398 | 4.10E-05 | 0.000253 | 16 | 15 | 39  | 43  |
| LMO1          | -1.325 | 4.14E-05 | 0.000255 | 20 | 19 | 56  | 42  |
| GRIA2         | -3.026 | 4.31E-05 | 0.000265 | 2  | 2  | 22  | 12  |
| GREM2         | -1.652 | 4.33E-05 | 0.000266 | 7  | 11 | 29  | 28  |

|                |        |          |          |    |    |    |     |
|----------------|--------|----------|----------|----|----|----|-----|
| RP11-923I11.6  | -2.464 | 4.34E-05 | 0.000266 | 2  | 4  | 19 | 15  |
| PROX1-AS1      | -1.096 | 4.65E-05 | 0.000284 | 41 | 30 | 81 | 71  |
| AC012354.6     | -2.986 | 4.66E-05 | 0.000284 | 3  | 2  | 29 | 12  |
| CASC1          | -1.597 | 4.66E-05 | 0.000284 | 13 | 10 | 37 | 33  |
| R3HDM2P1       | -1.145 | 4.77E-05 | 0.00029  | 19 | 32 | 52 | 61  |
| ST14           | -3.185 | 5.02E-05 | 0.000304 | 1  | 3  | 29 | 9   |
| RP11-1109M24.5 | -1.302 | 5.22E-05 | 0.000315 | 19 | 19 | 53 | 41  |
| AC073464.11    | -1.692 | 5.58E-05 | 0.000335 | 14 | 10 | 30 | 48  |
| AF131216.5     | -1.083 | 5.85E-05 | 0.00035  | 20 | 37 | 58 | 63  |
| PARK2          | -1.035 | 5.95E-05 | 0.000355 | 39 | 38 | 67 | 91  |
| GABRP          | -3.19  | 6.04E-05 | 0.00036  | 0  | 3  | 10 | 19  |
| GRM8           | -1.878 | 6.05E-05 | 0.00036  | 6  | 8  | 30 | 22  |
| EMP1           | -1.167 | 6.19E-05 | 0.000368 | 30 | 34 | 90 | 54  |
| BMP5           | -1.597 | 6.22E-05 | 0.000369 | 14 | 9  | 36 | 34  |
| MMD2           | -2.893 | 6.22E-05 | 0.000369 | 2  | 2  | 16 | 15  |
| SEMA4A         | -1.013 | 6.30E-05 | 0.000374 | 35 | 66 | 83 | 121 |
| RP11-594N15.3  | -1.185 | 6.35E-05 | 0.000376 | 20 | 23 | 46 | 52  |
| PDGFB          | -2.221 | 6.76E-05 | 0.000399 | 9  | 2  | 23 | 29  |
| CT476828.2     | -1.499 | 6.80E-05 | 0.000401 | 20 | 11 | 42 | 46  |
| CHRNA9         | -2.125 | 6.81E-05 | 0.000401 | 7  | 5  | 35 | 18  |
| SEL1L2         | -1.191 | 6.90E-05 | 0.000406 | 26 | 26 | 49 | 70  |
| AC006445.8     | -3.147 | 7.07E-05 | 0.000415 | 0  | 4  | 10 | 27  |
| RNA5SP162      | -6.585 | 7.12E-05 | 0.000418 | 0  | 0  | 7  | 12  |
| TCAM1P         | -1.387 | 7.19E-05 | 0.000422 | 18 | 14 | 38 | 46  |
| ODF3L2         | -3.574 | 7.20E-05 | 0.000422 | 0  | 2  | 11 | 15  |
| FAM107A        | -6.508 | 7.21E-05 | 0.000423 | 0  | 0  | 10 | 8   |
| CDK15          | -3.185 | 7.28E-05 | 0.000426 | 2  | 2  | 28 | 10  |
| RP11-444D3.1   | -2.29  | 7.36E-05 | 0.000431 | 2  | 5  | 17 | 18  |
| RSPH1          | -3.14  | 7.47E-05 | 0.000437 | 1  | 2  | 15 | 13  |
| CTC-281F24.1   | -1.085 | 7.81E-05 | 0.000454 | 41 | 40 | 67 | 105 |
| SHD            | -1.131 | 7.83E-05 | 0.000456 | 34 | 28 | 58 | 78  |
| FAM150A        | -1.271 | 8.21E-05 | 0.000476 | 31 | 24 | 83 | 50  |
| RP11-162A12.2  | -1.223 | 8.26E-05 | 0.000479 | 16 | 31 | 46 | 64  |
| DNAH10OS       | -1.434 | 8.43E-05 | 0.000487 | 45 | 20 | 76 | 100 |
| TPTE2P3        | -2.43  | 8.76E-05 | 0.000505 | 4  | 4  | 31 | 13  |
| MCF2L-AS1      | -1.229 | 8.94E-05 | 0.000515 | 15 | 22 | 42 | 45  |
| SPINK2         | -1.009 | 9.02E-05 | 0.000519 | 25 | 37 | 60 | 65  |
| PCDH11X        | -1.597 | 9.02E-05 | 0.000519 | 5  | 18 | 35 | 35  |
| SCGB3A2        | -1.68  | 9.09E-05 | 0.000522 | 32 | 15 | 51 | 100 |
| CTNNA3         | -2.091 | 9.11E-05 | 0.000524 | 3  | 6  | 19 | 20  |
| RP11-689P11.2  | -1.575 | 9.24E-05 | 0.00053  | 8  | 12 | 26 | 34  |

|               |        |          |          |    |    |     |     |
|---------------|--------|----------|----------|----|----|-----|-----|
| RP11-396M11.1 | -1.526 | 9.29E-05 | 0.000533 | 16 | 12 | 33  | 48  |
| BATF2         | -1.022 | 9.32E-05 | 0.000534 | 28 | 30 | 63  | 55  |
| RP4-595K12.1  | -1.044 | 9.42E-05 | 0.00054  | 52 | 41 | 79  | 113 |
| CATSPERG      | -1.072 | 9.46E-05 | 0.000541 | 22 | 54 | 74  | 86  |
| FUT7          | -2.364 | 9.54E-05 | 0.000546 | 0  | 8  | 20  | 22  |
| RP11-524O24.2 | -1.508 | 0.000101 | 0.000573 | 12 | 16 | 30  | 50  |
| SULT2B1       | -1.271 | 0.000106 | 0.000601 | 14 | 24 | 54  | 38  |
| ALPK2         | -1.408 | 0.000108 | 0.000611 | 14 | 13 | 32  | 40  |
| FAM201A       | -1.317 | 0.000108 | 0.000614 | 22 | 14 | 46  | 44  |
| UBE2E1-AS1    | -1.156 | 0.00011  | 0.000621 | 19 | 28 | 60  | 45  |
| CYP27A1       | -1.152 | 0.000111 | 0.000627 | 18 | 26 | 45  | 53  |
| RP11-84E24.3  | -1.554 | 0.000112 | 0.000634 | 7  | 15 | 28  | 37  |
| RP11-436H11.4 | -1.1   | 0.000123 | 0.000687 | 20 | 34 | 67  | 49  |
| RP11-485G7.5  | -1.073 | 0.000124 | 0.000693 | 22 | 34 | 68  | 50  |
| RPS11P6       | -2.747 | 0.000124 | 0.000693 | 1  | 3  | 11  | 17  |
| Z83851.1      | -1.095 | 0.000124 | 0.000696 | 27 | 45 | 96  | 58  |
| RP11-699L21.1 | -4.209 | 0.000126 | 0.000706 | 0  | 1  | 14  | 8   |
| FEZF1-AS1     | -1.078 | 0.000133 | 0.000739 | 26 | 26 | 50  | 60  |
| RP11-303G3.6  | -1.174 | 0.000133 | 0.00074  | 14 | 28 | 44  | 51  |
| SIDT1-AS1     | -1.932 | 0.000134 | 0.000744 | 8  | 6  | 19  | 35  |
| AC020907.1    | -4.143 | 0.000136 | 0.000757 | 1  | 0  | 9   | 12  |
| AC139103.1    | -1.446 | 0.000137 | 0.00076  | 9  | 14 | 34  | 29  |
| THBS4         | -1.077 | 0.000139 | 0.000771 | 22 | 31 | 48  | 64  |
| EDA2R         | -1.128 | 0.000139 | 0.000772 | 46 | 39 | 119 | 67  |
| WNT7B         | -1.452 | 0.000141 | 0.000779 | 8  | 16 | 31  | 35  |
| RP13-371D18.2 | -1.036 | 0.000143 | 0.000788 | 28 | 27 | 55  | 58  |
| RP11-266L9.6  | -1.09  | 0.000149 | 0.000819 | 27 | 72 | 124 | 87  |
| MYEOV         | -2.697 | 0.000149 | 0.00082  | 6  | 0  | 25  | 15  |
| FTH1P20       | -3.087 | 0.00015  | 0.000823 | 1  | 2  | 16  | 11  |
| SYNE2         | -6.508 | 0.000153 | 0.000839 | 0  | 0  | 6   | 12  |
| MIR1289-1     | -1.084 | 0.000156 | 0.000851 | 38 | 27 | 62  | 76  |
| AC003090.1    | -1.629 | 0.000157 | 0.000858 | 9  | 8  | 28  | 25  |
| ISCA1P4       | -1.78  | 0.000164 | 0.000893 | 4  | 11 | 20  | 32  |
| CREB3L1       | -1.207 | 0.000164 | 0.000893 | 13 | 25 | 46  | 42  |
| RP11-736K20.5 | -2.142 | 0.000164 | 0.000894 | 2  | 6  | 16  | 20  |
| DENND6B       | -1.214 | 0.000167 | 0.000906 | 12 | 31 | 48  | 52  |
| FCGR2B        | -3.087 | 0.000167 | 0.000908 | 3  | 0  | 13  | 14  |
| RP11-366M4.3  | -3.363 | 0.000168 | 0.000914 | 2  | 2  | 8   | 35  |
| RANP4         | -1.17  | 0.000183 | 0.00099  | 33 | 26 | 52  | 81  |
| DBX2          | -1.344 | 0.000186 | 0.001    | 16 | 15 | 47  | 32  |
| MLLT4-AS1     | -1.248 | 0.000188 | 0.00101  | 34 | 24 | 53  | 85  |

|               |        |          |         |    |    |     |    |
|---------------|--------|----------|---------|----|----|-----|----|
| RP11-496I9.1  | -1.175 | 0.000193 | 0.00104 | 66 | 38 | 143 | 92 |
| MIR375        | -1.401 | 0.000193 | 0.00104 | 10 | 16 | 30  | 39 |
| RP11-129B22.6 | -1.173 | 0.000195 | 0.00105 | 26 | 20 | 58  | 46 |
| DUX4L7        | -1.107 | 0.000206 | 0.0011  | 15 | 29 | 50  | 45 |
| GPRC6A        | -6.34  | 0.000209 | 0.00112 | 0  | 0  | 7   | 9  |
| CHST4         | -1.203 | 0.000213 | 0.00113 | 25 | 27 | 77  | 43 |
| RP11-666A1.5  | -1.01  | 0.000213 | 0.00114 | 20 | 36 | 55  | 58 |
| ALOX5         | -1.201 | 0.000215 | 0.00115 | 17 | 29 | 66  | 40 |
| WTAPP1        | -1.049 | 0.000224 | 0.00119 | 31 | 24 | 60  | 54 |
| CHAD          | -1.477 | 0.000227 | 0.0012  | 23 | 11 | 56  | 39 |
| CTC-430J12.2  | -2.329 | 0.000228 | 0.00121 | 0  | 8  | 17  | 24 |
| CDH22         | -2.331 | 0.000237 | 0.00125 | 2  | 4  | 13  | 18 |
| IRAK3         | -1.325 | 0.00024  | 0.00126 | 16 | 17 | 51  | 32 |
| SEMA5B        | -1.627 | 0.000242 | 0.00127 | 9  | 9  | 34  | 22 |
| RP11-66N11.8  | -1.04  | 0.000249 | 0.00131 | 23 | 27 | 48  | 55 |
| DUX4L8        | -1.257 | 0.000249 | 0.00131 | 15 | 15 | 36  | 36 |
| AP000640.10   | -1.599 | 0.000249 | 0.00131 | 7  | 13 | 39  | 22 |
| RP11-177H13.2 | -1.446 | 0.00025  | 0.00131 | 8  | 15 | 27  | 36 |
| RP5-1092L12.2 | -3.399 | 0.00025  | 0.00131 | 2  | 0  | 13  | 10 |
| AC115115.3    | -1.337 | 0.000251 | 0.00131 | 10 | 16 | 33  | 33 |
| RP11-15I11.2  | -1.632 | 0.000268 | 0.00139 | 4  | 12 | 26  | 24 |
| C1orf228      | -1.632 | 0.000279 | 0.00145 | 6  | 10 | 24  | 26 |
| RPS26P21      | -1.415 | 0.000305 | 0.00157 | 10 | 12 | 34  | 25 |
| PDGFRB        | -2.747 | 0.000305 | 0.00157 | 3  | 1  | 16  | 12 |
| FRMPD2        | -2.421 | 0.000308 | 0.00159 | 5  | 1  | 15  | 18 |
| CTD-2555K7.2  | -1.463 | 0.00031  | 0.00159 | 13 | 9  | 30  | 31 |
| RP11-69H7.4   | -6.248 | 0.000319 | 0.00163 | 0  | 0  | 7   | 8  |
| RP11-330L19.2 | -3.399 | 0.000332 | 0.00169 | 0  | 2  | 9   | 14 |
| IFIH1         | -1.655 | 0.000342 | 0.00174 | 18 | 6  | 36  | 40 |
| SOWAHD        | -1.491 | 0.000345 | 0.00175 | 13 | 10 | 39  | 26 |
| CTC-236F12.4  | -1.844 | 0.000355 | 0.0018  | 3  | 8  | 19  | 21 |
| CTD-2514C3.1  | -1.114 | 0.000363 | 0.00184 | 19 | 22 | 51  | 38 |
| AC099684.1    | -2.695 | 0.000367 | 0.00185 | 2  | 2  | 12  | 15 |
| PLAU          | -1.095 | 0.000369 | 0.00186 | 15 | 35 | 58  | 49 |
| RP4-773A18.4  | -1.17  | 0.000389 | 0.00196 | 17 | 18 | 43  | 36 |
| KCNA3         | -1.011 | 0.000392 | 0.00196 | 19 | 31 | 56  | 45 |
| PPIAL4B       | -6.34  | 0.000405 | 0.00203 | 0  | 0  | 11  | 5  |
| PPIAL4C       | -6.34  | 0.000406 | 0.00203 | 0  | 0  | 11  | 5  |
| GRM5          | -2.839 | 0.000416 | 0.00208 | 3  | 2  | 9   | 28 |
| MGAT4C        | -2.21  | 0.000417 | 0.00208 | 5  | 5  | 12  | 35 |
| NMUR1         | -1.574 | 0.000424 | 0.00212 | 10 | 8  | 22  | 32 |

|               |        |          |         |     |    |     |     |
|---------------|--------|----------|---------|-----|----|-----|-----|
| TCHH          | -1.976 | 0.000425 | 0.00212 | 5   | 4  | 22  | 14  |
| AC010983.1    | -6.34  | 0.000436 | 0.00217 | 0   | 0  | 5   | 11  |
| RP11-307O13.1 | -1.458 | 0.000441 | 0.00219 | 24  | 9  | 46  | 45  |
| RP11-46H11.3  | -1.45  | 0.000457 | 0.00226 | 11  | 9  | 29  | 26  |
| RP11-391M20.1 | -1.93  | 0.000468 | 0.00231 | 12  | 12 | 72  | 20  |
| RP11-284F21.7 | -1.181 | 0.000469 | 0.00231 | 12  | 43 | 66  | 59  |
| RP11-526A4.1  | -1.217 | 0.000474 | 0.00234 | 11  | 22 | 33  | 44  |
| ICAM5         | -1.08  | 0.000478 | 0.00235 | 16  | 26 | 49  | 40  |
| RP11-356C4.5  | -1.66  | 0.000491 | 0.00241 | 7   | 9  | 32  | 19  |
| AL353662.3    | -1.18  | 0.000506 | 0.00247 | 12  | 21 | 43  | 32  |
| DUX4          | -1.156 | 0.000529 | 0.00258 | 18  | 16 | 38  | 38  |
| CTD-2269F5.1  | -1.921 | 0.00055  | 0.00267 | 4   | 8  | 15  | 31  |
| RP11-347E10.1 | -6.15  | 0.000578 | 0.00279 | 0   | 0  | 6   | 8   |
| NRXN3         | -1.034 | 0.000625 | 0.003   | 139 | 69 | 239 | 187 |
| RP4-811H24.9  | -1.744 | 0.000632 | 0.00303 | 2   | 11 | 19  | 25  |
| CBFA2T3       | -1.202 | 0.000637 | 0.00305 | 14  | 15 | 34  | 33  |
| ZNF469        | -2.185 | 0.00064  | 0.00306 | 2   | 4  | 16  | 12  |
| RP4-613B23.1  | -1.196 | 0.000641 | 0.00307 | 15  | 15 | 36  | 33  |
| TUBB7P        | -1.509 | 0.000654 | 0.00312 | 11  | 11 | 41  | 22  |
| C6orf99       | -1.575 | 0.000656 | 0.00313 | 12  | 8  | 22  | 38  |
| RP1-118J21.25 | -1.098 | 0.00066  | 0.00314 | 35  | 20 | 58  | 60  |
| HHIP-AS1      | -1.025 | 0.000665 | 0.00316 | 50  | 31 | 96  | 69  |
| KCNJ9         | -2.439 | 0.000683 | 0.00324 | 0   | 5  | 17  | 11  |
| RP11-406A9.2  | -2.333 | 0.000691 | 0.00328 | 1   | 4  | 11  | 15  |
| TRPV4         | -1.37  | 0.000732 | 0.00346 | 8   | 12 | 30  | 22  |
| CD36          | -1.365 | 0.000733 | 0.00346 | 8   | 14 | 34  | 23  |
| RP11-214C8.2  | -6.15  | 0.000744 | 0.0035  | 0   | 0  | 9   | 5   |
| RP11-809O17.1 | -1.119 | 0.000747 | 0.00352 | 34  | 23 | 49  | 75  |
| CCDC170       | -1.084 | 0.000759 | 0.00357 | 13  | 27 | 41  | 44  |
| CCT8P1        | -1.272 | 0.000771 | 0.00362 | 10  | 23 | 50  | 30  |
| MYLK4         | -1.043 | 0.000784 | 0.00367 | 26  | 20 | 45  | 50  |
| ITGB8         | -1.684 | 0.000787 | 0.00368 | 5   | 7  | 22  | 17  |
| GRIN1         | -1.108 | 0.000804 | 0.00375 | 30  | 33 | 92  | 44  |
| MIR221        | -1.346 | 0.00081  | 0.00378 | 174 | 84 | 472 | 184 |
| SIX3          | -1.715 | 0.000821 | 0.00382 | 2   | 14 | 32  | 21  |
| LGI1          | -1.894 | 0.000831 | 0.00386 | 5   | 4  | 21  | 13  |
| RP11-615I2.3  | -6.585 | 0.000837 | 0.00388 | 0   | 0  | 18  | 1   |
| GBP1          | -1.111 | 0.000854 | 0.00396 | 13  | 23 | 45  | 33  |
| OLIG3         | -2.585 | 0.000858 | 0.00397 | 0   | 4  | 9   | 16  |
| RP11-807H7.1  | -1.354 | 0.000872 | 0.00403 | 10  | 20 | 26  | 51  |
| RP11-87C12.4  | -1.72  | 0.000874 | 0.00403 | 7   | 5  | 24  | 16  |

|               |        |          |         |      |      |      |      |
|---------------|--------|----------|---------|------|------|------|------|
| TEX36         | -2.387 | 0.000874 | 0.00403 | 2    | 3    | 15   | 12   |
| RP11-23F23.2  | -2.236 | 0.000877 | 0.00404 | 3    | 3    | 15   | 14   |
| THRB-IT1      | -1.047 | 0.000883 | 0.00407 | 45   | 27   | 64   | 85   |
| KRT6A         | -6.044 | 0.000898 | 0.00413 | 0    | 0    | 6    | 7    |
| FAM90A8P      | -1.928 | 0.0009   | 0.00414 | 2    | 6    | 14   | 17   |
| AC034243.1    | -3.199 | 0.00092  | 0.00422 | 2    | 0    | 9    | 11   |
| AC116609.2    | -1.231 | 0.000926 | 0.00425 | 12   | 16   | 39   | 27   |
| PTH1R         | -1.014 | 0.000931 | 0.00427 | 16   | 25   | 44   | 39   |
| ESPNP         | -3.923 | 0.00094  | 0.0043  | 0    | 1    | 6    | 12   |
| MRO           | -1.928 | 0.000949 | 0.00434 | 4    | 4    | 17   | 14   |
| TPTEP1        | -1.456 | 0.000954 | 0.00436 | 5    | 12   | 26   | 21   |
| F2RL2         | -1.014 | 0.000964 | 0.0044  | 16   | 24   | 43   | 38   |
| LINC00238     | -6.248 | 0.000968 | 0.00441 | 0    | 0    | 4    | 11   |
| EPSTI1        | -1.315 | 0.00104  | 0.00472 | 14   | 12   | 39   | 26   |
| RP13-401N8.3  | -1.512 | 0.00105  | 0.00476 | 5    | 11   | 22   | 24   |
| PACRG         | -1.193 | 0.00105  | 0.00477 | 11   | 16   | 34   | 28   |
| EFCAB3        | -1.288 | 0.00107  | 0.00482 | 12   | 19   | 27   | 49   |
| AC026150.8    | -1.274 | 0.00107  | 0.00482 | 17   | 11   | 32   | 36   |
| PPIAL4A       | -6.044 | 0.00107  | 0.00485 | 0    | 0    | 8    | 5    |
| CTD-2522E6.4  | -1.48  | 0.00109  | 0.0049  | 4    | 12   | 22   | 23   |
| HCRTR2        | -2.527 | 0.0011   | 0.00496 | 2    | 2    | 11   | 13   |
| AC021016.8    | -1.114 | 0.00111  | 0.00499 | 20   | 15   | 41   | 35   |
| CPAMD8        | -1.181 | 0.00112  | 0.00504 | 13   | 16   | 38   | 28   |
| RP11-230B22.1 | -1.524 | 0.00113  | 0.00507 | 12   | 7    | 21   | 34   |
| AC064834.1    | -2.728 | 0.00118  | 0.00528 | 0    | 3    | 14   | 7    |
| GPR1          | -1.327 | 0.0012   | 0.00536 | 6    | 15   | 29   | 24   |
| AMOT          | -1.119 | 0.00123  | 0.00545 | 4383 | 2127 | 9962 | 4175 |
| CD164L2       | -1.97  | 0.00123  | 0.00547 | 3    | 4    | 15   | 13   |
| PRSS45        | -1.261 | 0.00127  | 0.00563 | 8    | 14   | 29   | 24   |
| HTR2C         | -1.442 | 0.00127  | 0.00563 | 4    | 22   | 31   | 40   |
| FAM154A       | -2.387 | 0.00128  | 0.00565 | 0    | 5    | 10   | 17   |
| F10           | -2.115 | 0.00132  | 0.00582 | 5    | 2    | 17   | 14   |
| RASA4DP       | -1.033 | 0.00136  | 0.00596 | 13   | 26   | 43   | 37   |
| RP11-74C13.3  | -2.079 | 0.00136  | 0.00597 | 2    | 4    | 15   | 11   |
| HNRNPA1P25    | -1.218 | 0.00138  | 0.00604 | 14   | 22   | 28   | 56   |
| RP11-593F23.1 | -1.337 | 0.00139  | 0.00609 | 16   | 10   | 27   | 39   |
| RAB37         | -1.302 | 0.00144  | 0.00627 | 14   | 9    | 29   | 28   |
| RP11-127L20.6 | -2.02  | 0.00145  | 0.0063  | 2    | 5    | 18   | 11   |
| RP11-586D19.2 | -1.072 | 0.00147  | 0.0064  | 30   | 17   | 49   | 50   |
| RP11-307C19.1 | -1.075 | 0.00147  | 0.0064  | 13   | 32   | 57   | 38   |
| LINC00494     | -1.443 | 0.0015   | 0.0065  | 13   | 6    | 24   | 28   |



|               |        |           |           |       |       |      |      |
|---------------|--------|-----------|-----------|-------|-------|------|------|
| RP11-184E9.1  | -3.126 | 0.0015    | 0.00652   | 2     | 0     | 11   | 8    |
| FAM84B        | -1.261 | 0.00151   | 0.00654   | 308   | 152   | 809  | 294  |
| C16orf11      | -1.861 | 0.00157   | 0.00677   | 21    | 5     | 66   | 29   |
| RP11-86H7.7   | -1.537 | 0.00158   | 0.00682   | 4     | 10    | 20   | 21   |
| RP11-363D14.1 | -5.931 | 0.00163   | 0.00699   | 0     | 0     | 7    | 5    |
| TNFRSF13C     | -1.2   | 0.00163   | 0.007     | 13    | 13    | 25   | 35   |
| RP11-274J7.3  | -1.358 | 0.00164   | 0.00703   | 10    | 9     | 24   | 25   |
| AC102953.4    | -5.931 | 0.00166   | 0.0071    | 0     | 0     | 5    | 7    |
| PDZK1IP1-AS1  | -2.858 | 0.00169   | 0.00721   | 2     | 1     | 16   | 7    |
| AC129929.5    | -1.607 | 0.00171   | 0.00731   | 8     | 5     | 24   | 16   |
| AC026877.1    | -1.54  | 0.00173   | 0.00739   | 8     | 7     | 17   | 27   |
| RP11-656E20.4 | -2.22  | 0.00174   | 0.0074    | 1     | 7     | 10   | 28   |
| RP11-314D7.3  | -2.466 | 0.00175   | 0.00745   | 0     | 4     | 15   | 8    |
| ADAMTS14      | -2.158 | 0.00175   | 0.00745   | 1     | 4     | 12   | 11   |
| MLC1          | -2.333 | 0.0018    | 0.00762   | 3     | 2     | 16   | 10   |
| TMIE          | -1.208 | 0.0018    | 0.00765   | 13    | 12    | 31   | 27   |
| C1QTNF9B      | -1.607 | 0.00186   | 0.00786   | 3     | 10    | 23   | 17   |
| LIMS2         | -1.573 | 0.00187   | 0.00789   | 2     | 14    | 26   | 22   |
| SERHL         | -1.247 | 0.00187   | 0.00789   | 14    | 20    | 55   | 26   |
| LINC00357     | -1.571 | 0.00188   | 0.00793   | 5     | 9     | 16   | 26   |
| LDLRAD2       | -2.387 | 0.00189   | 0.00794   | 4     | 1     | 17   | 10   |
| PPIAL4G       | -3.126 | 0.00192   | 0.00809   | 2     | 0     | 12   | 7    |
| AC005152.2    | -1.224 | 0.002     | 0.00836   | 14    | 12    | 26   | 35   |
| RP11-264L1.3  | -3.663 | 0.00202   | 0.00843   | 1     | 0     | 7    | 8    |
| KB-1980E6.3   | -3.663 | 0.00202   | 0.00843   | 1     | 0     | 7    | 8    |
| INPP5D        | -1.486 | 0.00202   | 0.00843   | 37    | 10    | 58   | 74   |
| RP11-830F9.6  | -3.048 | 0.00207   | 0.00863   | 0     | 2     | 10   | 8    |
| NTS           | -1.051 | 0.00208   | 0.00865   | 12    | 27    | 35   | 46   |
| RP5-940J5.3   | -1.151 | 0.00215   | 0.00894   | 11    | 15    | 25   | 33   |
| AC096670.3    | -2.182 | 0.00222   | 0.00919   | 3     | 5     | 8    | 29   |
| TM4SF19-AS1   | -1.387 | 0.00222   | 0.00919   | 12    | 7     | 21   | 29   |
| EIF4BP2       | -1.206 | 0.00222   | 0.0092    | 23    | 12    | 35   | 46   |
| YBX2          | -1.083 | 0.00225   | 0.00931   | 14    | 18    | 28   | 40   |
| GJA5          | -5.931 | 0.00228   | 0.0094    | 0     | 0     | 4    | 8    |
| RP11-259G18.1 | -1.039 | 0.0023    | 0.00948   | 16    | 17    | 36   | 32   |
| NPSR1-AS1     | -1.894 | 0.00232   | 0.00956   | 12    | 4     | 17   | 43   |
| GPRIN2        | -3.199 | 0.00233   | 0.00958   | 2     | 0     | 6    | 14   |
| RP11-778D9.4  | -1.658 | 0.00239   | 0.0098    | 6     | 4     | 14   | 18   |
| AC097724.3    | -1.381 | 0.00242   | 0.00992   | 4     | 12    | 21   | 21   |
| ZCCHC12       | 2.274  | 7.85E-153 | 2.17E-148 | 3935  | 4697  | 905  | 879  |
| HCFC1         | 1.645  | 6.43E-91  | 2.96E-87  | 11617 | 13185 | 3982 | 3948 |

|                  |       |          |          |        |        |       |       |
|------------------|-------|----------|----------|--------|--------|-------|-------|
| DNAJB1           | 1.442 | 1.82E-73 | 2.80E-70 | 13101  | 16303  | 5396  | 5428  |
| HSPA8            | 1.571 | 7.56E-59 | 5.97E-56 | 378753 | 542269 | 2E+05 | 2E+05 |
| IRAK1            | 1.317 | 5.43E-58 | 4.06E-55 | 10934  | 13018  | 4997  | 4617  |
| CCDC86           | 1.257 | 1.10E-47 | 5.05E-45 | 4244   | 5011   | 1970  | 1901  |
| RRP12            | 1.442 | 4.42E-47 | 1.88E-44 | 2094   | 2594   | 852   | 873   |
| HSPH1            | 1.106 | 4.11E-42 | 1.26E-39 | 10556  | 12645  | 5468  | 5314  |
| HSP90AA1         | 1.095 | 1.54E-41 | 4.40E-39 | 171887 | 214463 | 89518 | 91364 |
| CLU              | 1.747 | 1.89E-40 | 5.23E-38 | 1451   | 2159   | 541   | 534   |
| NAALAD2          | 1.127 | 2.97E-40 | 8.13E-38 | 7875   | 9339   | 3866  | 4013  |
| DPH2             | 1.16  | 5.85E-39 | 1.46E-36 | 4564   | 5855   | 2397  | 2264  |
| EIF4G2           | 1.05  | 1.84E-38 | 4.42E-36 | 72749  | 91676  | 40149 | 39254 |
| CBX6             | 1.101 | 7.84E-38 | 1.85E-35 | 18777  | 24220  | 9874  | 10176 |
| CDC20            | 1.097 | 4.12E-37 | 8.97E-35 | 6742   | 8623   | 3579  | 3605  |
| DHX37            | 1.21  | 1.16E-36 | 2.48E-34 | 3019   | 3961   | 1493  | 1524  |
| BRPF3            | 1.343 | 2.55E-36 | 5.35E-34 | 2048   | 2760   | 936   | 959   |
| BCYRN1           | 1.089 | 3.32E-34 | 5.96E-32 | 8044   | 10694  | 4460  | 4351  |
| LANCL2           | 1.325 | 4.70E-34 | 8.28E-32 | 2205   | 3044   | 1081  | 1014  |
| RP11-442N24__B.1 | 1.279 | 5.63E-34 | 9.80E-32 | 2066   | 2335   | 892   | 921   |
| DNAJA1           | 1.192 | 7.19E-34 | 1.24E-31 | 23392  | 32430  | 11790 | 12644 |
| TUBB4B           | 1.131 | 1.19E-32 | 1.88E-30 | 43045  | 60060  | 23472 | 23595 |
| ZNF503           | 1.11  | 3.67E-31 | 5.28E-29 | 3154   | 4062   | 1631  | 1711  |
| NOL6             | 1.158 | 1.95E-30 | 2.61E-28 | 2707   | 3534   | 1354  | 1443  |
| DUS3L            | 1.107 | 4.83E-29 | 5.66E-27 | 2492   | 3245   | 1356  | 1307  |
| ANKRD52          | 1.001 | 1.25E-28 | 1.40E-26 | 3937   | 4936   | 2269  | 2165  |
| ADI1             | 1.166 | 2.89E-28 | 3.08E-26 | 4985   | 6739   | 2450  | 2773  |
| CREBBP           | 1.079 | 1.23E-25 | 1.02E-23 | 3385   | 3851   | 1616  | 1808  |
| ARSB             | 1.106 | 2.20E-25 | 1.79E-23 | 1989   | 2601   | 1046  | 1087  |
| TNFRSF12A        | 1.78  | 3.37E-25 | 2.71E-23 | 1010   | 1672   | 417   | 364   |
| MPDU1            | 1.006 | 1.83E-24 | 1.40E-22 | 4704   | 6452   | 2831  | 2725  |
| BAG3             | 1.146 | 2.74E-24 | 2.05E-22 | 1683   | 2169   | 837   | 903   |
| TAGLN2           | 1.115 | 4.47E-24 | 3.26E-22 | 11227  | 16659  | 6615  | 6258  |
| GCLM             | 1.134 | 4.54E-24 | 3.30E-22 | 4153   | 5413   | 1994  | 2366  |
| LRRC41           | 1.017 | 4.93E-24 | 3.56E-22 | 3991   | 5465   | 2305  | 2366  |
| RNU4-2           | 1.447 | 3.20E-23 | 2.13E-21 | 1381   | 1375   | 552   | 459   |
| PARVA            | 1.301 | 1.68E-22 | 1.05E-20 | 960    | 1299   | 445   | 472   |
| PNO1             | 1.043 | 7.12E-22 | 4.19E-20 | 2518   | 3391   | 1378  | 1489  |
| POLR2A           | 1.121 | 4.41E-20 | 2.19E-18 | 2808   | 2763   | 1262  | 1299  |
| CTD-2651B20.6    | 1.325 | 1.18E-19 | 5.63E-18 | 1206   | 1618   | 638   | 489   |
| HSPA6            | 2.271 | 1.23E-19 | 5.85E-18 | 275    | 469    | 90    | 64    |
| MAGED2           | 1.04  | 4.31E-19 | 1.94E-17 | 5147   | 7707   | 3107  | 3146  |
| POLE4            | 1.063 | 1.31E-18 | 5.58E-17 | 1166   | 1509   | 638   | 642   |

|                |       |          |          |      |      |     |     |
|----------------|-------|----------|----------|------|------|-----|-----|
| DOHH           | 1.128 | 1.57E-18 | 6.62E-17 | 945  | 1108 | 487 | 452 |
| C7orf26        | 1.161 | 5.41E-17 | 1.93E-15 | 766  | 1017 | 403 | 394 |
| THOC6          | 1.006 | 1.53E-16 | 5.23E-15 | 1150 | 1347 | 644 | 599 |
| GTPBP6         | 1.015 | 3.19E-16 | 1.05E-14 | 1123 | 1333 | 640 | 575 |
| PRSS23         | 1.099 | 3.32E-16 | 1.10E-14 | 1379 | 1957 | 734 | 823 |
| RRP9           | 1.056 | 3.35E-16 | 1.10E-14 | 1048 | 1405 | 614 | 566 |
| RP11-1033A18.1 | 1.342 | 3.69E-16 | 1.21E-14 | 550  | 573  | 223 | 220 |
| PRR22          | 1.708 | 1.66E-15 | 5.02E-14 | 283  | 446  | 119 | 104 |
| RNU5A-8P       | 1.428 | 2.45E-15 | 7.29E-14 | 569  | 787  | 220 | 284 |
| RCBTB2         | 1.425 | 7.07E-15 | 2.01E-13 | 309  | 403  | 139 | 126 |
| RP11-473M20.16 | 1.5   | 1.62E-14 | 4.37E-13 | 290  | 409  | 132 | 115 |
| CTGF           | 1.87  | 2.60E-14 | 6.80E-13 | 201  | 337  | 71  | 76  |
| RNU5B-1        | 1.254 | 3.17E-14 | 8.24E-13 | 486  | 628  | 217 | 250 |
| TESK1          | 1.134 | 7.08E-14 | 1.77E-12 | 651  | 907  | 361 | 349 |
| AVEN           | 1.09  | 7.42E-14 | 1.84E-12 | 661  | 806  | 331 | 358 |
| IGFBP4         | 1.477 | 5.43E-13 | 1.22E-11 | 288  | 308  | 119 | 95  |
| LY6K           | 8.209 | 6.41E-13 | 1.43E-11 | 27   | 32   | 0   | 0   |
| ANXA1          | 2.384 | 6.55E-13 | 1.46E-11 | 112  | 223  | 34  | 30  |
| SYTL5          | 1.773 | 2.06E-12 | 4.30E-11 | 142  | 207  | 49  | 53  |
| RNU4-1         | 1.281 | 7.31E-12 | 1.42E-10 | 809  | 717  | 334 | 294 |
| RNU5A-1        | 1.009 | 1.20E-11 | 2.25E-10 | 647  | 834  | 354 | 382 |
| FAM102A        | 1.092 | 4.11E-11 | 7.12E-10 | 490  | 689  | 285 | 268 |
| AC114776.1     | 1.153 | 4.12E-11 | 7.13E-10 | 358  | 443  | 173 | 187 |
| GLYCTK         | 1.139 | 5.79E-11 | 9.79E-10 | 391  | 543  | 218 | 206 |
| MIR22HG        | 1.376 | 5.92E-11 | 1.00E-09 | 225  | 323  | 102 | 109 |
| FOXD4          | 1.227 | 1.00E-10 | 1.63E-09 | 266  | 329  | 128 | 126 |
| DOK3           | 1.476 | 1.31E-10 | 2.10E-09 | 230  | 285  | 111 | 74  |
| RP11-295G20.2  | 1.071 | 3.44E-10 | 5.16E-09 | 943  | 1541 | 583 | 599 |
| TAGLN          | 1.375 | 3.50E-10 | 5.24E-09 | 235  | 367  | 114 | 118 |
| SLC25A21       | 1.273 | 3.68E-10 | 5.50E-09 | 258  | 274  | 111 | 109 |
| RP11-279N8.3   | 1.038 | 1.25E-09 | 1.75E-08 | 463  | 517  | 224 | 253 |
| DNAJA4         | 1.018 | 1.61E-09 | 2.21E-08 | 388  | 477  | 210 | 217 |
| CT47A1         | 3.377 | 2.11E-09 | 2.84E-08 | 30   | 55   | 4   | 4   |
| CGA            | 4.134 | 2.39E-09 | 3.19E-08 | 24   | 32   | 1   | 2   |
| GADD45B        | 1.033 | 3.05E-09 | 4.00E-08 | 547  | 796  | 354 | 302 |
| RP5-875O13.1   | 1.035 | 3.73E-09 | 4.82E-08 | 366  | 415  | 196 | 185 |
| AC016910.1     | 1.572 | 4.52E-09 | 5.74E-08 | 135  | 136  | 44  | 47  |
| RP4-564F22.5   | 1.48  | 7.95E-09 | 9.77E-08 | 166  | 158  | 57  | 59  |
| CPA4           | 4.055 | 1.28E-08 | 1.53E-07 | 21   | 32   | 1   | 2   |
| RP11-47K11.2   | 1.078 | 1.82E-08 | 2.12E-07 | 357  | 418  | 164 | 203 |
| SYT14          | 1.243 | 1.90E-08 | 2.20E-07 | 186  | 238  | 83  | 96  |

|               |       |          |          |     |      |     |     |
|---------------|-------|----------|----------|-----|------|-----|-----|
| SGK1          | 1.03  | 2.04E-08 | 2.35E-07 | 630 | 1018 | 413 | 394 |
| CT47A5        | 3.272 | 2.07E-08 | 2.38E-07 | 27  | 52   | 4   | 4   |
| RP11-109N23.1 | 1.583 | 2.46E-08 | 2.80E-07 | 135 | 234  | 70  | 53  |
| KCNJ14        | 1.359 | 4.48E-08 | 4.87E-07 | 142 | 197  | 74  | 58  |
| RP11-305N23.1 | 1.311 | 4.54E-08 | 4.93E-07 | 155 | 205  | 81  | 64  |
| NUBP1         | 1.227 | 4.71E-08 | 5.09E-07 | 169 | 227  | 83  | 86  |
| RP11-145G20.1 | 1.083 | 5.71E-08 | 6.07E-07 | 416 | 512  | 186 | 252 |
| FOXD4L4       | 1.112 | 7.37E-08 | 7.70E-07 | 232 | 326  | 127 | 131 |
| FOXD4L2       | 1.112 | 7.41E-08 | 7.73E-07 | 232 | 326  | 127 | 131 |
| CTD-2561B21.5 | 1.288 | 8.30E-08 | 8.59E-07 | 147 | 183  | 63  | 72  |
| RP11-452H21.4 | 1.086 | 1.99E-07 | 1.92E-06 | 406 | 456  | 170 | 236 |
| ETS1          | 4.915 | 3.46E-07 | 3.19E-06 | 15  | 21   | 1   | 0   |
| HSPA7         | 2.417 | 3.56E-07 | 3.27E-06 | 40  | 73   | 15  | 6   |
| TSACC         | 1.116 | 5.89E-07 | 5.21E-06 | 175 | 237  | 95  | 95  |
| RP11-15N24.4  | 1.332 | 6.36E-07 | 5.60E-06 | 160 | 150  | 69  | 54  |
| AC017104.2    | 1.315 | 7.72E-07 | 6.71E-06 | 130 | 149  | 65  | 47  |
| FOXD4L5       | 1.168 | 9.13E-07 | 7.82E-06 | 176 | 240  | 81  | 104 |
| RP11-540O11.7 | 1.104 | 9.80E-07 | 8.32E-06 | 408 | 349  | 167 | 185 |
| KCNH6         | 1.459 | 1.50E-06 | 1.23E-05 | 88  | 102  | 40  | 29  |
| HOXA7         | 1.179 | 1.91E-06 | 1.54E-05 | 162 | 178  | 86  | 64  |
| RP11-368I7.4  | 1.906 | 2.18E-06 | 1.74E-05 | 46  | 67   | 18  | 12  |
| TMEM217       | 1.492 | 2.18E-06 | 1.74E-05 | 76  | 96   | 27  | 34  |
| RP11-23E10.3  | 2.358 | 2.19E-06 | 1.75E-05 | 50  | 38   | 6   | 11  |
| SOX15         | 1.541 | 2.25E-06 | 1.79E-05 | 88  | 87   | 35  | 25  |
| ANKRD1        | 1.552 | 2.73E-06 | 2.13E-05 | 92  | 181  | 48  | 45  |
| CT47A7        | 4     | 3.55E-06 | 2.72E-05 | 15  | 20   | 0   | 2   |
| RP5-1074L1.1  | 1.289 | 3.80E-06 | 2.90E-05 | 103 | 149  | 48  | 55  |
| AC105396.3    | 1.056 | 4.09E-06 | 3.10E-05 | 193 | 198  | 94  | 94  |
| CT47A12       | 3.396 | 4.09E-06 | 3.10E-05 | 15  | 29   | 2   | 2   |
| MIP           | 1.103 | 4.74E-06 | 3.55E-05 | 149 | 167  | 71  | 76  |
| CT47A9        | 3.294 | 5.87E-06 | 4.31E-05 | 15  | 26   | 2   | 2   |
| CT47A8        | 3.294 | 5.88E-06 | 4.32E-05 | 15  | 26   | 2   | 2   |
| CT47A4        | 3.294 | 5.89E-06 | 4.32E-05 | 15  | 26   | 2   | 2   |
| CT47A11       | 3.294 | 5.89E-06 | 4.32E-05 | 15  | 26   | 2   | 2   |
| CT47A3        | 3.294 | 5.89E-06 | 4.32E-05 | 15  | 26   | 2   | 2   |
| CT47A10       | 3.294 | 5.90E-06 | 4.33E-05 | 15  | 26   | 2   | 2   |
| RYR3          | 1.054 | 5.93E-06 | 4.35E-05 | 177 | 249  | 113 | 92  |
| INHBA         | 1.704 | 6.43E-06 | 4.68E-05 | 72  | 62   | 19  | 22  |
| DPYSL3        | 1.599 | 7.78E-06 | 5.56E-05 | 60  | 101  | 24  | 29  |
| ANKDD1B       | 1.957 | 1.12E-05 | 7.72E-05 | 41  | 45   | 13  | 9   |
| PTGDR2        | 1.244 | 1.35E-05 | 9.22E-05 | 99  | 150  | 49  | 56  |

|                |       |          |          |     |     |     |     |
|----------------|-------|----------|----------|-----|-----|-----|-----|
| RP11-697M17.2  | 1.3   | 1.94E-05 | 0.000129 | 79  | 106 | 36  | 39  |
| REC8           | 1.096 | 1.99E-05 | 0.000132 | 130 | 178 | 80  | 64  |
| AC079613.1     | 1.21  | 2.26E-05 | 0.000148 | 98  | 122 | 42  | 53  |
| RP4-694A7.4    | 1.842 | 3.02E-05 | 0.000192 | 73  | 53  | 12  | 23  |
| RP11-589M4.2   | 1.471 | 3.94E-05 | 0.000244 | 74  | 65  | 24  | 26  |
| RP13-15E13.1   | 1.344 | 4.05E-05 | 0.000251 | 85  | 159 | 51  | 45  |
| SRCRB4D        | 1.272 | 4.24E-05 | 0.000261 | 86  | 93  | 42  | 32  |
| EEF1A1P14      | 2.019 | 4.38E-05 | 0.000269 | 32  | 74  | 13  | 13  |
| TRIM64EP       | 1.165 | 4.44E-05 | 0.000272 | 197 | 180 | 67  | 101 |
| ETV4           | 1.842 | 5.19E-05 | 0.000314 | 36  | 47  | 14  | 9   |
| RP11-318C24.1  | 1.347 | 6.13E-05 | 0.000365 | 63  | 95  | 30  | 32  |
| ATP4A          | 1.476 | 6.26E-05 | 0.000372 | 53  | 67  | 24  | 19  |
| RP11-150O12.1  | 1.102 | 6.91E-05 | 0.000407 | 165 | 301 | 116 | 101 |
| AC126118.1     | 1.339 | 7.55E-05 | 0.000441 | 69  | 73  | 27  | 29  |
| WNK4           | 1.113 | 7.96E-05 | 0.000463 | 95  | 128 | 56  | 47  |
| MYO1G          | 2.512 | 8.32E-05 | 0.000482 | 31  | 27  | 9   | 1   |
| RP11-425D10.10 | 1.419 | 8.39E-05 | 0.000486 | 70  | 64  | 28  | 22  |
| RP4-794H19.2   | 1.265 | 8.78E-05 | 0.000507 | 74  | 121 | 43  | 38  |
| RP11-295D4.1   | 1.301 | 9.62E-05 | 0.00055  | 112 | 147 | 36  | 69  |
| COL12A1        | 1.254 | 0.00012  | 0.000674 | 70  | 102 | 32  | 40  |
| PCDHB15        | 1.011 | 0.000132 | 0.000734 | 115 | 131 | 60  | 62  |
| RP4-635E18.6   | 1.275 | 0.000133 | 0.00074  | 65  | 95  | 37  | 29  |
| FN3K           | 1.379 | 0.000147 | 0.000807 | 77  | 69  | 23  | 33  |
| RP11-96A1.5    | 2.06  | 0.00016  | 0.000873 | 28  | 31  | 4   | 10  |
| ATP5G1P4       | 1.941 | 0.00017  | 0.000922 | 34  | 28  | 8   | 8   |
| FOSB           | 1.256 | 0.000184 | 0.000995 | 88  | 175 | 56  | 54  |
| GAL3ST4        | 1.149 | 0.000234 | 0.00124  | 84  | 87  | 36  | 41  |
| AC004019.13    | 2.21  | 0.000236 | 0.00124  | 24  | 23  | 5   | 5   |
| AVPR2          | 6.426 | 0.000294 | 0.00152  | 8   | 9   | 0   | 0   |
| ADM5           | 1.237 | 0.000298 | 0.00154  | 66  | 71  | 28  | 30  |
| RP5-875H3.2    | 2.06  | 0.000309 | 0.00159  | 33  | 26  | 4   | 10  |
| RNF180         | 2.846 | 0.000311 | 0.0016   | 16  | 14  | 3   | 1   |
| FAM166A        | 1.402 | 0.000361 | 0.00183  | 47  | 67  | 26  | 17  |
| RP11-174O3.1   | 2.204 | 0.000368 | 0.00186  | 18  | 38  | 8   | 4   |
| RPS3AP44       | 1.886 | 0.000381 | 0.00192  | 29  | 27  | 9   | 6   |
| RPL31P52       | 1.099 | 0.00046  | 0.00227  | 74  | 104 | 45  | 38  |
| RP11-473M20.11 | 1.05  | 0.000471 | 0.00232  | 91  | 110 | 42  | 55  |
| RP11-184D12.1  | 2.408 | 0.000494 | 0.00242  | 16  | 22  | 4   | 3   |
| TSSK5P1        | 1.542 | 0.000499 | 0.00244  | 34  | 45  | 12  | 15  |
| CNTN4          | 1.252 | 0.000517 | 0.00252  | 51  | 66  | 24  | 25  |
| SERPINB8       | 2.231 | 0.000517 | 0.00252  | 17  | 26  | 3   | 6   |

|               |       |          |         |    |     |    |    |
|---------------|-------|----------|---------|----|-----|----|----|
| SLC27A4       | 1.314 | 0.000605 | 0.00291 | 51 | 96  | 30 | 29 |
| AC013400.2    | 1.29  | 0.000662 | 0.00315 | 58 | 67  | 19 | 32 |
| AC004840.8    | 1.697 | 0.0007   | 0.00332 | 53 | 35  | 17 | 10 |
| H2BFM         | 1.878 | 0.000713 | 0.00337 | 21 | 31  | 8  | 6  |
| HGD           | 2.505 | 0.000718 | 0.00339 | 19 | 16  | 4  | 2  |
| NDST1         | 3.285 | 0.000777 | 0.00364 | 7  | 24  | 2  | 1  |
| ELSPBP1       | 6.248 | 0.000817 | 0.0038  | 7  | 8   | 0  | 0  |
| HSPB8         | 1.503 | 0.000865 | 0.004   | 89 | 209 | 33 | 72 |
| FAM109B       | 1.247 | 0.000873 | 0.00403 | 89 | 75  | 44 | 25 |
| RP11-415J8.3  | 1.898 | 0.000945 | 0.00432 | 22 | 27  | 5  | 8  |
| HCLS1         | 2.464 | 0.000973 | 0.00444 | 14 | 20  | 3  | 3  |
| RP11-334L9.1  | 1.196 | 0.000991 | 0.00451 | 53 | 87  | 31 | 30 |
| AC012442.6    | 2.919 | 0.00104  | 0.00472 | 9  | 15  | 1  | 2  |
| RP11-521D12.5 | 6.15  | 0.00112  | 0.00504 | 8  | 6   | 0  | 0  |
| NIPA2P4       | 6.34  | 0.00113  | 0.00508 | 4  | 12  | 0  | 0  |
| FOXD4L1       | 1.162 | 0.00114  | 0.00509 | 62 | 115 | 39 | 40 |
| RP11-632F7.1  | 1.282 | 0.00124  | 0.00549 | 51 | 66  | 31 | 17 |
| C15orf26      | 1.167 | 0.0014   | 0.00612 | 69 | 66  | 36 | 24 |
| AF230666.2    | 1.793 | 0.00141  | 0.00617 | 21 | 28  | 7  | 7  |
| GALR2         | 1.508 | 0.00152  | 0.00658 | 46 | 34  | 13 | 15 |
| RP11-158M2.5  | 1.36  | 0.00152  | 0.0066  | 38 | 65  | 23 | 17 |
| C7orf71       | 1.898 | 0.0016   | 0.00689 | 27 | 22  | 4  | 9  |
| FAM71F2       | 1.575 | 0.00161  | 0.00692 | 31 | 29  | 9  | 11 |
| SETP20        | 1.448 | 0.00162  | 0.00695 | 33 | 41  | 16 | 11 |
| RP11-758P17.3 | 2.377 | 0.00164  | 0.00704 | 17 | 15  | 3  | 3  |
| RP11-65D17.1  | 6.34  | 0.00171  | 0.0073  | 12 | 4   | 0  | 0  |
| RP11-403P17.4 | 1.309 | 0.00186  | 0.00784 | 49 | 43  | 16 | 21 |
| RNA5SP491     | 1.513 | 0.00193  | 0.00811 | 52 | 34  | 13 | 17 |
| RP11-59H1.1   | 1.062 | 0.00203  | 0.00846 | 69 | 69  | 35 | 31 |
| HIGD1B        | 1.36  | 0.00207  | 0.00861 | 44 | 41  | 13 | 20 |
| HNRNPA1P15    | 1.506 | 0.00213  | 0.00884 | 25 | 35  | 9  | 12 |
| RP11-23E19.1  | 6.15  | 0.00217  | 0.00901 | 4  | 10  | 0  | 0  |
| RP11-383J24.1 | 6.15  | 0.00217  | 0.00901 | 4  | 10  | 0  | 0  |
| NUFIP1P       | 6.044 | 0.00224  | 0.00927 | 8  | 5   | 0  | 0  |
| AC017074.2    | 1.879 | 0.00224  | 0.00928 | 19 | 22  | 5  | 6  |
| LA16c-390H2.4 | 2.799 | 0.00238  | 0.00979 | 7  | 29  | 1  | 4  |

**Table S3: Functional annotation of EZH2 regulated genes**

| Functional annotation (GO) analysis of EZH2 activated genes |                                                                      |                   |             |          |
|-------------------------------------------------------------|----------------------------------------------------------------------|-------------------|-------------|----------|
| Identifier                                                  | GO Term                                                              | Genes in the list | Total genes | PValue   |
| GO:0030182                                                  | neuron differentiation                                               | 42                | 438         | 9.52E-08 |
| GO:0048666                                                  | neuron development                                                   | 35                | 339         | 2.48E-07 |
| GO:0000904                                                  | cell morphogenesis involved in differentiation                       | 28                | 244         | 6.46E-07 |
| GO:0007409                                                  | axonogenesis                                                         | 24                | 193         | 1.21E-06 |
| GO:0048667                                                  | cell morphogenesis involved in neuron differentiation                | 25                | 209         | 1.40E-06 |
| GO:0048812                                                  | neuron projection morphogenesis                                      | 25                | 213         | 1.97E-06 |
| GO:0048858                                                  | cell projection morphogenesis                                        | 26                | 245         | 7.25E-06 |
| GO:0031099                                                  | regeneration                                                         | 13                | 69          | 9.93E-06 |
| GO:0031175                                                  | neuron projection development                                        | 26                | 256         | 1.55E-05 |
| GO:0032990                                                  | cell part morphogenesis                                              | 26                | 256         | 1.55E-05 |
| GO:0000902                                                  | cell morphogenesis                                                   | 32                | 356         | 1.58E-05 |
| GO:0030030                                                  | cell projection organization                                         | 32                | 368         | 3.01E-05 |
| GO:0007423                                                  | sensory organ development                                            | 23                | 229         | 6.40E-05 |
| GO:0060348                                                  | bone development                                                     | 16                | 123         | 6.62E-05 |
| GO:0019932                                                  | second-messenger-mediated signaling                                  | 23                | 235         | 9.40E-05 |
| GO:0007155                                                  | cell adhesion                                                        | 48                | 700         | 1.10E-04 |
| GO:0022610                                                  | biological adhesion                                                  | 48                | 701         | 1.10E-04 |
| GO:0001503                                                  | ossification                                                         | 15                | 115         | 1.17E-04 |
| GO:0032989                                                  | cellular component morphogenesis                                     | 32                | 397         | 1.23E-04 |
| GO:0007626                                                  | locomotory behavior                                                  | 25                | 274         | 1.30E-04 |
| GO:0042471                                                  | ear morphogenesis                                                    | 11                | 66          | 1.82E-04 |
| GO:0001501                                                  | skeletal system development                                          | 27                | 319         | 2.19E-04 |
| GO:0040008                                                  | regulation of growth                                                 | 28                | 341         | 2.70E-04 |
| GO:0048638                                                  | regulation of developmental growth                                   | 9                 | 47          | 3.54E-04 |
| GO:0031100                                                  | organ regeneration                                                   | 7                 | 26          | 3.55E-04 |
| GO:0007267                                                  | cell-cell signaling                                                  | 41                | 600         | 4.07E-04 |
| GO:0045944                                                  | positive regulation of transcription from RNA polymerase II promoter | 29                | 371         | 4.55E-04 |
| GO:0050954                                                  | sensory perception of mechanical stimulus                            | 13                | 103         | 5.33E-04 |
| GO:0009891                                                  | positive regulation of biosynthetic process                          | 45                | 695         | 6.31E-04 |

|            |                                                                                                                                |    |     |           |
|------------|--------------------------------------------------------------------------------------------------------------------------------|----|-----|-----------|
| GO:0007200 | activation of phospholipase C activity by G-protein coupled receptor protein signaling pathway coupled to IP3 second messenger | 9  | 52  | 7.18E-04  |
| GO:0010863 | positive regulation of phospholipase C activity                                                                                | 10 | 65  | 7.49E-04  |
| GO:0007202 | activation of phospholipase C activity                                                                                         | 10 | 65  | 7.49E-04  |
| GO:0031328 | positive regulation of cellular biosynthetic process                                                                           | 44 | 685 | 8.65E-04  |
| GO:0046928 | regulation of neurotransmitter secretion                                                                                       | 6  | 21  | 9.61E-04  |
| GO:0051094 | positive regulation of developmental process                                                                                   | 23 | 278 | 9.91E-04  |
| GO:0007610 | behavior                                                                                                                       | 33 | 469 | 0.0010403 |
| GO:0040012 | regulation of locomotion                                                                                                       | 18 | 192 | 0.0010731 |
| GO:0048545 | response to steroid hormone stimulus                                                                                           | 18 | 192 | 0.0010731 |
| GO:0007605 | sensory perception of sound                                                                                                    | 12 | 97  | 0.0011283 |
| GO:0010518 | positive regulation of phospholipase activity                                                                                  | 10 | 69  | 0.0011614 |
| GO:0042472 | inner ear morphogenesis                                                                                                        | 9  | 56  | 0.0011867 |
| GO:0045893 | positive regulation of transcription, DNA-dependent                                                                            | 33 | 477 | 0.0013707 |
| GO:0010517 | regulation of phospholipase activity                                                                                           | 10 | 71  | 0.0014273 |
| GO:0051254 | positive regulation of RNA metabolic process                                                                                   | 33 | 481 | 0.001567  |
| GO:0044057 | regulation of system process                                                                                                   | 24 | 309 | 0.0017223 |
| GO:0048015 | phosphoinositide-mediated signaling                                                                                            | 11 | 88  | 0.0018425 |
| GO:0009100 | glycoprotein metabolic process                                                                                                 | 18 | 202 | 0.0018636 |
| GO:0009611 | response to wounding                                                                                                           | 35 | 530 | 0.0019955 |
| GO:0009968 | negative regulation of signal transduction                                                                                     | 19 | 221 | 0.0019993 |
| GO:0030335 | positive regulation of cell migration                                                                                          | 11 | 89  | 0.0020069 |
| GO:0030334 | regulation of cell migration                                                                                                   | 16 | 169 | 0.0020182 |
| GO:0016477 | cell migration                                                                                                                 | 22 | 276 | 0.0020447 |
| GO:0060193 | positive regulation of lipase activity                                                                                         | 10 | 75  | 0.0021053 |
| GO:0031644 | regulation of neurological system process                                                                                      | 15 | 153 | 0.0021182 |
| GO:0048568 | embryonic organ development                                                                                                    | 16 | 172 | 0.0023962 |
| GO:0051588 | regulation of neurotransmitter transport                                                                                       | 6  | 26  | 0.0026563 |
| GO:0051384 | response to glucocorticoid stimulus                                                                                            | 10 | 78  | 0.0027652 |
| GO:0051270 | regulation of cell motion                                                                                                      | 17 | 193 | 0.0029131 |
| GO:0032101 | regulation of response to external stimulus                                                                                    | 15 | 159 | 0.0030231 |
| GO:0010648 | negative regulation of cell communication                                                                                      | 20 | 248 | 0.0030404 |
| GO:0043583 | ear development                                                                                                                | 11 | 95  | 0.003258  |
| GO:0048870 | cell motility                                                                                                                  | 23 | 307 | 0.0033961 |
| GO:0051674 | localization of cell                                                                                                           | 23 | 307 | 0.0033961 |
| GO:0010557 | positive regulation of macromolecule biosynthetic process                                                                      | 40 | 654 | 0.0036638 |
| GO:0040017 | positive regulation of locomotion                                                                                              | 11 | 98  | 0.0040822 |



|            |                                                                                              |    |     |           |
|------------|----------------------------------------------------------------------------------------------|----|-----|-----------|
| GO:0051272 | positive regulation of cell motion                                                           | 11 | 98  | 0.0040822 |
| GO:0001654 | eye development                                                                              | 13 | 132 | 0.0045175 |
| GO:0006140 | regulation of nucleotide metabolic process                                                   | 12 | 116 | 0.0046788 |
| GO:0048562 | embryonic organ morphogenesis                                                                | 13 | 133 | 0.0047994 |
| GO:0051173 | positive regulation of nitrogen compound metabolic process                                   | 39 | 644 | 0.0048863 |
| GO:0031960 | response to corticosteroid stimulus                                                          | 10 | 85  | 0.0049432 |
| GO:0045637 | regulation of myeloid cell differentiation                                                   | 9  | 70  | 0.0049635 |
| GO:0010628 | positive regulation of gene expression                                                       | 36 | 581 | 0.0049648 |
| GO:0030817 | regulation of cAMP biosynthetic process                                                      | 11 | 101 | 0.005063  |
| GO:0045941 | positive regulation of transcription                                                         | 35 | 564 | 0.0053845 |
| GO:0050804 | regulation of synaptic transmission                                                          | 13 | 136 | 0.0057303 |
| GO:0060191 | regulation of lipase activity                                                                | 10 | 87  | 0.0057615 |
| GO:0030814 | regulation of cAMP metabolic process                                                         | 11 | 103 | 0.0058133 |
| GO:0007167 | enzyme linked receptor protein signaling pathway                                             | 24 | 342 | 0.006012  |
| GO:0030855 | epithelial cell differentiation                                                              | 13 | 137 | 0.0060705 |
| GO:0003018 | vascular process in circulatory system                                                       | 8  | 58  | 0.0062322 |
| GO:0043627 | response to estrogen stimulus                                                                | 11 | 105 | 0.0066477 |
| GO:0051216 | cartilage development                                                                        | 9  | 74  | 0.0069469 |
| GO:0048598 | embryonic morphogenesis                                                                      | 22 | 307 | 0.0070132 |
| GO:0010885 | regulation of cholesterol storage                                                            | 4  | 11  | 0.0072007 |
| GO:0008038 | neuron recognition                                                                           | 5  | 21  | 0.007417  |
| GO:0030514 | negative regulation of BMP signaling pathway                                                 | 5  | 21  | 0.007417  |
| GO:0019226 | transmission of nerve impulse                                                                | 24 | 350 | 0.0078729 |
| GO:0006928 | cell motion                                                                                  | 30 | 475 | 0.0084336 |
| GO:0045935 | positive regulation of nucleobase, nucleoside, nucleotide and nucleic acid metabolic process | 37 | 624 | 0.0085701 |
| GO:0030808 | regulation of nucleotide biosynthetic process                                                | 11 | 110 | 0.0091411 |
| GO:0030802 | regulation of cyclic nucleotide biosynthetic process                                         | 11 | 110 | 0.0091411 |
| GO:0048839 | inner ear development                                                                        | 9  | 79  | 0.0102052 |
| GO:0002088 | lens development in camera-type eye                                                          | 5  | 23  | 0.0103351 |
| GO:0051969 | regulation of transmission of nerve impulse                                                  | 13 | 147 | 0.0104265 |
| GO:0001764 | neuron migration                                                                             | 8  | 64  | 0.010602  |
| GO:0019935 | cyclic-nucleotide-mediated signaling                                                         | 12 | 130 | 0.0107866 |
| GO:0001822 | kidney development                                                                           | 10 | 96  | 0.0108034 |
| GO:0045761 | regulation of adenylate cyclase activity                                                     | 10 | 96  | 0.0108034 |
| GO:0030799 | regulation of cyclic nucleotide metabolic process                                            | 11 | 113 | 0.0109476 |
| GO:0030001 | metal ion transport                                                                          | 29 | 465 | 0.0111553 |

|            |                                                                          |    |      |           |
|------------|--------------------------------------------------------------------------|----|------|-----------|
| GO:0007166 | cell surface receptor linked signal transduction                         | 90 | 1856 | 0.0117488 |
| GO:0003013 | circulatory system process                                               | 15 | 186  | 0.0117513 |
| GO:0008015 | blood circulation                                                        | 15 | 186  | 0.0117513 |
| GO:0031279 | regulation of cyclase activity                                           | 10 | 99   | 0.013061  |
| GO:0060429 | epithelium development                                                   | 17 | 227  | 0.013327  |
| GO:0009725 | response to hormone stimulus                                             | 24 | 367  | 0.0133298 |
| GO:0010743 | regulation of foam cell differentiation                                  | 5  | 25   | 0.0139076 |
| GO:0045597 | positive regulation of cell differentiation                              | 17 | 229  | 0.0143848 |
| GO:0006334 | nucleosome assembly                                                      | 9  | 84   | 0.0144795 |
| GO:0042060 | wound healing                                                            | 15 | 191  | 0.0145575 |
| GO:0035249 | synaptic transmission, glutamatergic                                     | 4  | 14   | 0.0145926 |
| GO:0051339 | regulation of lyase activity                                             | 10 | 101  | 0.0147493 |
| GO:0050880 | regulation of blood vessel size                                          | 7  | 53   | 0.0149175 |
| GO:0035150 | regulation of tube size                                                  | 7  | 53   | 0.0149175 |
| GO:0001944 | vasculature development                                                  | 18 | 251  | 0.0157627 |
| GO:0046888 | negative regulation of hormone secretion                                 | 5  | 26   | 0.0159533 |
| GO:0032355 | response to estradiol stimulus                                           | 7  | 54   | 0.0162597 |
| GO:0043279 | response to alkaloid                                                     | 7  | 54   | 0.0162597 |
| GO:0007178 | transmembrane receptor protein serine/threonine kinase signaling pathway | 10 | 103  | 0.0165933 |
| GO:0048589 | developmental growth                                                     | 9  | 87   | 0.0175976 |
| GO:0031497 | chromatin assembly                                                       | 9  | 87   | 0.0175976 |
| GO:0008037 | cell recognition                                                         | 7  | 55   | 0.0176829 |
| GO:0006957 | complement activation, alternative pathway                               | 4  | 15   | 0.017734  |
| GO:0007601 | visual perception                                                        | 16 | 216  | 0.0183161 |
| GO:0050953 | sensory perception of light stimulus                                     | 16 | 216  | 0.0183161 |
| GO:0009612 | response to mechanical stimulus                                          | 7  | 56   | 0.0191892 |
| GO:0007268 | synaptic transmission                                                    | 20 | 298  | 0.0197822 |
| GO:0007411 | axon guidance                                                            | 10 | 107  | 0.0207787 |
| GO:0001649 | osteoblast differentiation                                               | 6  | 42   | 0.0209025 |
| GO:0006956 | complement activation                                                    | 6  | 42   | 0.0209025 |
| GO:0048639 | positive regulation of developmental growth                              | 4  | 16   | 0.0212214 |
| GO:0048878 | chemical homeostasis                                                     | 30 | 512  | 0.021497  |
| GO:0009719 | response to endogenous stimulus                                          | 25 | 405  | 0.0215791 |
| GO:0042110 | T cell activation                                                        | 11 | 126  | 0.0220356 |
| GO:0065004 | protein-DNA complex assembly                                             | 9  | 91   | 0.0224685 |
| GO:0051046 | regulation of secretion                                                  | 15 | 202  | 0.0225255 |
| GO:0006874 | cellular calcium ion homeostasis                                         | 14 | 183  | 0.0228491 |
| GO:0003006 | reproductive developmental process                                       | 18 | 262  | 0.022928  |
| GO:0002541 | activation of plasma proteins involved in acute inflammatory response    | 6  | 43   | 0.0229365 |
| GO:0006029 | proteoglycan metabolic process                                           | 6  | 43   | 0.0229365 |

|            |                                                         |    |     |           |
|------------|---------------------------------------------------------|----|-----|-----------|
| GO:0001655 | urogenital system development                           | 10 | 110 | 0.0243817 |
| GO:0009628 | response to abiotic stimulus                            | 23 | 368 | 0.0247771 |
| GO:0001656 | metanephros development                                 | 6  | 44  | 0.0250944 |
| GO:0034728 | nucleosome organization                                 | 9  | 93  | 0.0252301 |
| GO:0001568 | blood vessel development                                | 17 | 245 | 0.0253771 |
| GO:0030510 | regulation of BMP signaling pathway                     | 5  | 30  | 0.0259672 |
| GO:0010604 | positive regulation of macromolecule metabolic process  | 45 | 857 | 0.0262979 |
| GO:0006811 | ion transport                                           | 41 | 768 | 0.026826  |
| GO:0007389 | pattern specification process                           | 18 | 267 | 0.0268493 |
| GO:0030005 | cellular di-, tri-valent inorganic cation homeostasis   | 16 | 227 | 0.027196  |
| GO:0055074 | calcium ion homeostasis                                 | 14 | 188 | 0.0277221 |
| GO:0048661 | positive regulation of smooth muscle cell proliferation | 5  | 31  | 0.0289447 |
| GO:0006664 | glycolipid metabolic process                            | 5  | 31  | 0.0289447 |
| GO:0048660 | regulation of smooth muscle cell proliferation          | 6  | 46  | 0.02979   |
| GO:0050905 | neuromuscular process                                   | 7  | 62  | 0.0300806 |
| GO:0030900 | forebrain development                                   | 12 | 152 | 0.0307499 |
| GO:0042246 | tissue regeneration                                     | 5  | 32  | 0.0321164 |
| GO:0032103 | positive regulation of response to external stimulus    | 7  | 64  | 0.0344568 |
| GO:0030324 | lung development                                        | 9  | 99  | 0.0349177 |
| GO:0016337 | cell-cell adhesion                                      | 18 | 276 | 0.0351314 |
| GO:0001709 | cell fate determination                                 | 5  | 33  | 0.0354837 |
| GO:0045639 | positive regulation of myeloid cell differentiation     | 5  | 33  | 0.0354837 |
| GO:0006939 | smooth muscle contraction                               | 5  | 33  | 0.0354837 |
| GO:0051480 | cytosolic calcium ion homeostasis                       | 10 | 118 | 0.0361192 |
| GO:0030155 | regulation of cell adhesion                             | 11 | 137 | 0.0364431 |
| GO:0048584 | positive regulation of response to stimulus             | 16 | 236 | 0.0365388 |
| GO:0048585 | negative regulation of response to stimulus             | 9  | 100 | 0.0367466 |
| GO:0045596 | negative regulation of cell differentiation             | 15 | 216 | 0.0368825 |
| GO:0006875 | cellular metal ion homeostasis                          | 14 | 196 | 0.0370389 |
| GO:0021700 | developmental maturation                                | 9  | 101 | 0.0386388 |
| GO:0050806 | positive regulation of synaptic transmission            | 5  | 34  | 0.0390475 |
| GO:0009101 | glycoprotein biosynthetic process                       | 12 | 158 | 0.0391144 |
| GO:0045165 | cell fate commitment                                    | 11 | 139 | 0.0396336 |
| GO:0055066 | di-, tri-valent inorganic cation homeostasis            | 16 | 239 | 0.0402804 |
| GO:0030323 | respiratory tube development                            | 9  | 102 | 0.0405952 |
| GO:0051345 | positive regulation of hydrolase activity               | 13 | 179 | 0.0410699 |
| GO:0035295 | tube development                                        | 15 | 220 | 0.0420766 |
| GO:0006935 | chemotaxis                                              | 12 | 160 | 0.042224  |

|            |                                                         |    |     |           |
|------------|---------------------------------------------------------|----|-----|-----------|
| GO:0006813 | potassium ion transport                                 | 12 | 160 | 0.042224  |
| GO:0042330 | taxis                                                   | 12 | 160 | 0.042224  |
| GO:0001657 | ureteric bud development                                | 5  | 35  | 0.0428081 |
| GO:0070482 | response to oxygen levels                               | 11 | 141 | 0.0430111 |
| GO:0014829 | vascular smooth muscle contraction                      | 3  | 9   | 0.0436057 |
| GO:0010883 | regulation of lipid storage                             | 4  | 21  | 0.0438306 |
| GO:0006816 | calcium ion transport                                   | 11 | 142 | 0.0447713 |
| GO:0051240 | positive regulation of multicellular organismal process | 16 | 244 | 0.0465488 |
| GO:0032675 | regulation of interleukin-6 production                  | 5  | 36  | 0.0467655 |
| GO:0048592 | eye morphogenesis                                       | 7  | 69  | 0.0471262 |
| GO:0040007 | growth                                                  | 13 | 183 | 0.0472428 |
| GO:0048286 | lung alveolus development                               | 4  | 22  | 0.0493622 |
| GO:0001658 | branching involved in ureteric bud morphogenesis        | 4  | 22  | 0.0493622 |
| GO:0060675 | ureteric bud morphogenesis                              | 4  | 22  | 0.0493622 |
| GO:0055065 | metal ion homeostasis                                   | 14 | 205 | 0.0499698 |

| Functional annotation (GO) analysis of EZH2 repressed genes |                                                        |                   |             |           |
|-------------------------------------------------------------|--------------------------------------------------------|-------------------|-------------|-----------|
| Identifier                                                  | GO Term                                                | Genes in the list | Total genes | PValue    |
| GO:0006986                                                  | response to unfolded protein                           | 6                 | 71          | 6.49E-05  |
| GO:0051789                                                  | response to protein stimulus                           | 6                 | 107         | 4.48E-04  |
| GO:0006457                                                  | protein folding                                        | 7                 | 177         | 6.64E-04  |
| GO:0010033                                                  | response to organic substance                          | 10                | 721         | 0.0280265 |
| GO:0045683                                                  | negative regulation of epidermis development           | 2                 | 5           | 0.0295859 |
| GO:0010604                                                  | positive regulation of macromolecule metabolic process | 11                | 857         | 0.0314504 |
| GO:0006790                                                  | sulfur metabolic process                               | 4                 | 115         | 0.0316331 |
| GO:0016573                                                  | histone acetylation                                    | 3                 | 48          | 0.0334414 |
| GO:0006916                                                  | anti-apoptosis                                         | 5                 | 206         | 0.0350326 |
| GO:0015718                                                  | monocarboxylic acid transport                          | 3                 | 50          | 0.0360406 |
| GO:0044272                                                  | sulfur compound biosynthetic process                   | 3                 | 50          | 0.0360406 |
| GO:0006473                                                  | protein amino acid acetylation                         | 3                 | 52          | 0.0387155 |
| GO:0001501                                                  | skeletal system development                            | 6                 | 319         | 0.0423512 |

| KEGG pathway analysis s of EZH2 activated genes |                                         |                   |             |           |
|-------------------------------------------------|-----------------------------------------|-------------------|-------------|-----------|
| Identifier                                      | GO Term                                 | Genes in the list | Total genes | PValue    |
| hsa04080                                        | Neuroactive ligand-receptor interaction | 23                | 256         | 0.0012679 |
| hsa05200                                        | Pathways in cancer                      | 25                | 328         | 0.0064785 |
| hsa04360                                        | Axon guidance                           | 13                | 129         | 0.0088458 |
| hsa05322                                        | Systemic lupus erythematosus            | 10                | 99          | 0.0252471 |
| hsa04512                                        | ECM-receptor interaction                | 9                 | 84          | 0.0266016 |
| hsa05218                                        | Melanoma                                | 8                 | 71          | 0.0313681 |
| hsa04350                                        | TGF-beta signaling pathway              | 9                 | 87          | 0.0319931 |
| hsa04510                                        | Focal adhesion                          | 15                | 201         | 0.0485787 |
| hsa04930                                        | Type II diabetes mellitus               | 6                 | 47          | 0.0492058 |
| hsa04666                                        | Fc gamma R-mediated phagocytosis        | 9                 | 95          | 0.0498986 |

## KEGG pathway analysis s of EZH2 repressed genes

| Identifier | GO Term | Genes in<br>the list | Total g<br>PValue |
|------------|---------|----------------------|-------------------|
|------------|---------|----------------------|-------------------|

No significantly enriched KEGG-pathways

| Gene_ID     | log2(Fold_change) | PValue    | FDR       | shTRIM28_rep1 | shTRIM28_rep2 | shCtrl_rep1 | shCtrl_rep2 |
|-------------|-------------------|-----------|-----------|---------------|---------------|-------------|-------------|
| GUCY1A3     | -11.177           | 7.44E-199 | 1.98E-194 | 1             | 0             | 1496        | 1282        |
| XIST        | -6.857            | 8.71E-184 | 1.16E-179 | 29            | 59            | 5350        | 4872        |
| NCAM2       | -4.191            | 1.32E-132 | 1.17E-128 | 157           | 133           | 2827        | 2475        |
| SYBU        | -5.102            | 1.95E-132 | 1.29E-128 | 49            | 51            | 1940        | 1502        |
| SULF1       | -4.511            | 2.02E-125 | 8.95E-122 | 83            | 70            | 1916        | 1577        |
| CA2         | -4.135            | 7.44E-120 | 2.82E-116 | 204           | 215           | 4108        | 3255        |
| FAM5C       | -12.326           | 2.59E-117 | 8.60E-114 | 0             | 0             | 564         | 463         |
| GPR179      | -5.594            | 2.29E-110 | 6.08E-107 | 16            | 23            | 1080        | 813         |
| LINC00472   | -3.914            | 6.45E-102 | 1.43E-98  | 333           | 364           | 5975        | 4536        |
| PVRL3       | -4.675            | 3.02E-93  | 5.73E-90  | 24            | 28            | 715         | 618         |
| CALML5      | -3.684            | 9.69E-93  | 1.71E-89  | 97            | 98            | 1318        | 1191        |
| PLCXD3      | -4.486            | 1.22E-84  | 1.90E-81  | 25            | 26            | 615         | 532         |
| KLK11       | -4.006            | 6.93E-84  | 1.02E-80  | 54            | 46            | 888         | 722         |
| SOX2        | -3.284            | 7.39E-77  | 9.35E-74  | 248           | 281           | 2873        | 2282        |
| RPL35AP31   | -11.214           | 1.58E-71  | 1.75E-68  | 0             | 0             | 266         | 209         |
| GUCY1B3     | -10.79            | 2.10E-61  | 1.69E-58  | 0             | 0             | 188         | 166         |
| HS6ST2      | -3.727            | 2.25E-59  | 1.66E-56  | 37            | 36            | 546         | 423         |
| LRFN5       | -10.604           | 1.63E-55  | 1.11E-52  | 0             | 0             | 156         | 155         |
| PRODH       | -3.884            | 1.05E-53  | 6.82E-51  | 22            | 19            | 325         | 283         |
| AC010729.1  | -7.153            | 7.01E-53  | 4.33E-50  | 2             | 0             | 164         | 149         |
| GPX2        | -2.695            | 3.90E-52  | 2.30E-49  | 142           | 145           | 1011        | 848         |
| HS3ST3A1    | -3.006            | 2.00E-51  | 1.16E-48  | 119           | 152           | 1212        | 967         |
| ROBO1       | -2.384            | 6.28E-51  | 3.55E-48  | 400           | 388           | 2265        | 1849        |
| TCEAL8      | -10.41            | 1.01E-49  | 5.59E-47  | 0             | 0             | 149         | 123         |
| SYNPO2      | -2.561            | 1.41E-49  | 7.64E-47  | 191           | 209           | 1269        | 1093        |
| PDE4D       | -3.991            | 1.84E-49  | 9.77E-47  | 17            | 14            | 261         | 235         |
| UGT1A6      | -2.333            | 1.65E-48  | 8.42E-46  | 292           | 278           | 1459        | 1414        |
| PHGDH       | -2.715            | 1.92E-48  | 9.61E-46  | 135           | 154           | 1043        | 856         |
| UBE2QL1     | -2.427            | 1.50E-47  | 7.24E-45  | 282           | 300           | 1713        | 1418        |
| CNTNAP2     | -3.846            | 4.25E-47  | 2.01E-44  | 19            | 27            | 380         | 284         |
| C9orf152    | -5.277            | 1.96E-46  | 9.13E-44  | 4             | 7             | 258         | 176         |
| CXCR4       | -2.718            | 6.35E-46  | 2.91E-43  | 133           | 140           | 1024        | 773         |
| BST2        | -3.48             | 1.08E-45  | 4.79E-43  | 30            | 44            | 465         | 363         |
| VAV3        | -2.163            | 1.14E-45  | 4.96E-43  | 720           | 726           | 3444        | 3033        |
| DACH1       | -10.212           | 2.31E-45  | 9.91E-43  | 0             | 0             | 121         | 116         |
| HEY2        | -2.928            | 2.94E-45  | 1.24E-42  | 68            | 89            | 620         | 576         |
| PALLD       | -2.262            | 1.71E-44  | 6.88E-42  | 300           | 267           | 1485        | 1235        |
| CTA-392E5.1 | -5.185            | 2.31E-44  | 9.16E-42  | 4             | 4             | 157         | 141         |
| SLITRK6     | -2.2              | 5.61E-44  | 2.10E-41  | 832           | 838           | 4271        | 3402        |

|               |        |          |          |      |      |      |      |
|---------------|--------|----------|----------|------|------|------|------|
| CORO1A        | -2.718 | 6.58E-42 | 2.33E-39 | 137  | 169  | 1146 | 869  |
| ZIC2          | -4.262 | 9.35E-42 | 3.27E-39 | 10   | 8    | 172  | 177  |
| DIO2          | -5.639 | 2.09E-41 | 7.04E-39 | 1    | 4    | 138  | 121  |
| ZNF827        | -3.887 | 3.06E-41 | 1.02E-38 | 16   | 12   | 200  | 217  |
| S100P         | -2.92  | 1.16E-40 | 3.76E-38 | 141  | 210  | 1289 | 1369 |
| BMPER         | -4.223 | 1.57E-39 | 4.91E-37 | 8    | 9    | 166  | 155  |
| MITF          | -2.63  | 2.88E-39 | 8.90E-37 | 82   | 90   | 589  | 477  |
| NAALADL2      | -2.453 | 7.41E-39 | 2.26E-36 | 115  | 116  | 699  | 567  |
| PPM1K         | -1.927 | 2.29E-38 | 6.75E-36 | 617  | 559  | 2417 | 2056 |
| TRIM28        | -2.066 | 1.80E-37 | 5.13E-35 | 1736 | 1867 | 8343 | 6740 |
| AXIN2         | -2.52  | 3.10E-37 | 8.65E-35 | 79   | 75   | 478  | 406  |
| RP11-124N14.4 | -3.316 | 3.64E-37 | 1.01E-34 | 26   | 19   | 247  | 203  |
| SLC1A1        | -2.857 | 1.18E-36 | 3.23E-34 | 56   | 74   | 531  | 412  |
| RP11-1081M5.1 | -3.674 | 2.98E-36 | 8.00E-34 | 11   | 20   | 218  | 180  |
| PLCB4         | -2.437 | 3.67E-36 | 9.76E-34 | 128  | 125  | 785  | 586  |
| SHH           | -1.92  | 3.89E-36 | 1.02E-33 | 645  | 572  | 2558 | 2048 |
| CECR2         | -3.996 | 1.56E-35 | 4.03E-33 | 10   | 14   | 227  | 159  |
| KIAA0226L     | -3.28  | 3.32E-35 | 8.48E-33 | 21   | 20   | 216  | 184  |
| VIM           | -3.378 | 3.57E-35 | 9.02E-33 | 23   | 20   | 258  | 191  |
| TIMP3         | -1.922 | 4.41E-35 | 1.10E-32 | 706  | 646  | 2889 | 2235 |
| C9orf47       | -1.916 | 4.49E-35 | 1.11E-32 | 479  | 461  | 1949 | 1600 |
| ELOVL2        | -1.932 | 2.28E-34 | 5.56E-32 | 622  | 624  | 2666 | 2090 |
| S100A16       | -2.234 | 3.16E-34 | 7.63E-32 | 900  | 1145 | 5221 | 4402 |
| SLC16A1       | -2.126 | 5.45E-34 | 1.29E-31 | 186  | 185  | 893  | 727  |
| RP1-140K8.5   | -3.293 | 5.07E-33 | 1.16E-30 | 21   | 18   | 215  | 169  |
| HS3ST3B1      | -2.275 | 8.52E-33 | 1.92E-30 | 139  | 131  | 745  | 563  |
| OLFML3        | -2.285 | 1.66E-32 | 3.55E-30 | 169  | 200  | 1014 | 785  |
| BCL11B        | -2.35  | 3.63E-32 | 7.64E-30 | 96   | 92   | 539  | 420  |
| RIMS2         | -3.152 | 4.25E-32 | 8.88E-30 | 28   | 48   | 385  | 292  |
| WDR72         | -2.447 | 7.40E-32 | 1.54E-29 | 81   | 58   | 411  | 348  |
| CPNE4         | -6.38  | 2.28E-31 | 4.69E-29 | 2    | 0    | 84   | 99   |
| AMPH          | -4.588 | 3.09E-30 | 6.16E-28 | 2    | 7    | 122  | 99   |
| DNAJC22       | -1.929 | 4.58E-30 | 9.07E-28 | 637  | 760  | 2883 | 2439 |
| LCN2          | -1.88  | 1.97E-29 | 3.85E-27 | 254  | 266  | 1018 | 897  |
| ZIC5          | -3.082 | 4.16E-29 | 8.06E-27 | 38   | 21   | 294  | 207  |
| TFF3          | -1.728 | 4.65E-29 | 8.95E-27 | 582  | 614  | 2109 | 1854 |
| KCNMA1        | -4.797 | 6.36E-29 | 1.21E-26 | 4    | 3    | 116  | 84   |
| EFNA5         | -2.257 | 1.41E-28 | 2.64E-26 | 109  | 86   | 531  | 402  |
| UNC5C         | -2.671 | 1.44E-28 | 2.65E-26 | 44   | 37   | 296  | 221  |
| C4orf19       | -1.678 | 2.04E-28 | 3.71E-26 | 587  | 600  | 2008 | 1791 |
| AP004372.1    | -5.298 | 9.50E-28 | 1.64E-25 | 2    | 2    | 93   | 72   |



|               |        |          |          |      |      |       |       |
|---------------|--------|----------|----------|------|------|-------|-------|
| TNFRSF19      | -4.31  | 1.04E-27 | 1.78E-25 | 7    | 4    | 131   | 91    |
| CAMK2D        | -1.756 | 1.46E-27 | 2.48E-25 | 308  | 291  | 1097  | 926   |
| KLK6          | -2.891 | 4.16E-27 | 6.85E-25 | 29   | 52   | 332   | 270   |
| BMP5          | -2.316 | 4.69E-27 | 7.63E-25 | 83   | 64   | 417   | 316   |
| RP11-400K9.4  | -2.361 | 5.44E-27 | 8.80E-25 | 62   | 76   | 392   | 318   |
| SBK1          | -2.118 | 1.02E-26 | 1.63E-24 | 104  | 117  | 529   | 431   |
| CHST1         | -2.694 | 1.18E-26 | 1.87E-24 | 29   | 30   | 210   | 173   |
| AC005301.8    | -3.797 | 1.44E-26 | 2.26E-24 | 9    | 7    | 129   | 96    |
| GP2           | -4.727 | 1.94E-26 | 3.01E-24 | 4    | 2    | 89    | 75    |
| BMPR1B        | -1.802 | 2.43E-26 | 3.73E-24 | 216  | 216  | 811   | 696   |
| REG4          | -9.433 | 4.33E-26 | 6.57E-24 | 0    | 0    | 60    | 78    |
| MUC5B         | -3.281 | 1.00E-25 | 1.50E-23 | 18   | 46   | 309   | 315   |
| HIST1H2BB     | -1.694 | 1.22E-25 | 1.82E-23 | 491  | 402  | 1392  | 1498  |
| MPPED2        | -2.732 | 1.37E-25 | 2.04E-23 | 26   | 25   | 186   | 154   |
| FAM129A       | -3.642 | 1.85E-25 | 2.72E-23 | 9    | 7    | 108   | 94    |
| AKAP5         | -1.609 | 2.16E-25 | 3.15E-23 | 640  | 638  | 2150  | 1750  |
| ANKRD35       | -2.888 | 3.11E-25 | 4.48E-23 | 36   | 18   | 228   | 173   |
| PLEKHO1       | -2.295 | 3.24E-25 | 4.65E-23 | 64   | 87   | 380   | 362   |
| PADI2         | -2.708 | 3.69E-25 | 5.26E-23 | 50   | 38   | 349   | 227   |
| AP001137.1    | -9.443 | 4.23E-25 | 5.97E-23 | 0    | 0    | 58    | 81    |
| MALL          | -1.755 | 5.73E-25 | 8.05E-23 | 242  | 217  | 857   | 693   |
| LPHN2         | -2.75  | 5.76E-25 | 8.06E-23 | 23   | 25   | 176   | 148   |
| RP11-573G6.2  | -9.17  | 1.68E-24 | 2.31E-22 | 0    | 0    | 64    | 51    |
| ADAMTS19      | -1.7   | 1.93E-24 | 2.63E-22 | 390  | 439  | 1413  | 1280  |
| ARAP1         | -1.599 | 2.21E-24 | 2.99E-22 | 4077 | 4257 | 13904 | 11340 |
| CAPN9         | -2.567 | 2.23E-24 | 3.00E-22 | 33   | 33   | 221   | 171   |
| CRAT          | -2.848 | 3.12E-24 | 4.18E-22 | 28   | 56   | 319   | 287   |
| RP11-493K23.4 | -4.052 | 4.81E-24 | 6.36E-22 | 7    | 3    | 85    | 84    |
| MAOB          | -2.133 | 5.24E-24 | 6.89E-22 | 69   | 64   | 320   | 264   |
| KIF1A         | -2.23  | 5.34E-24 | 6.98E-22 | 165  | 130  | 849   | 536   |
| DIRAS2        | -2.246 | 6.35E-24 | 8.26E-22 | 72   | 90   | 435   | 334   |
| EGLN3         | -1.765 | 8.48E-24 | 1.09E-21 | 235  | 261  | 914   | 772   |
| PKHD1L1       | -5.369 | 1.15E-23 | 1.46E-21 | 2    | 1    | 73    | 59    |
| SERPINE1      | -2.585 | 2.04E-23 | 2.58E-21 | 39   | 33   | 255   | 178   |
| UST           | -1.92  | 2.12E-23 | 2.66E-21 | 120  | 104  | 411   | 437   |
| KCNJ3         | -1.662 | 2.85E-23 | 3.55E-21 | 324  | 326  | 1142  | 915   |
| NPY1R         | -1.474 | 3.01E-23 | 3.70E-21 | 1913 | 1891 | 5646  | 4921  |
| CXCL12        | -1.555 | 3.02E-23 | 3.70E-21 | 830  | 882  | 2765  | 2266  |
| HOXD8         | -3.07  | 6.37E-23 | 7.59E-21 | 11   | 18   | 130   | 115   |
| MAPK8IP2      | -2.633 | 8.12E-23 | 9.63E-21 | 34   | 35   | 256   | 173   |
| GPR139        | -3.973 | 8.84E-23 | 1.04E-20 | 4    | 6    | 80    | 80    |

|               |        |          |          |       |       |       |       |
|---------------|--------|----------|----------|-------|-------|-------|-------|
| GCNT2         | -2.452 | 8.94E-23 | 1.05E-20 | 36    | 30    | 200   | 162   |
| ZNF804B       | -3.309 | 1.21E-22 | 1.42E-20 | 13    | 7     | 106   | 94    |
| CBX2          | -1.546 | 1.77E-22 | 2.05E-20 | 1830  | 1970  | 6080  | 5018  |
| NBPF6         | -1.721 | 3.21E-22 | 3.71E-20 | 314   | 350   | 1230  | 959   |
| RASGRP1       | -1.557 | 3.88E-22 | 4.44E-20 | 355   | 329   | 1102  | 911   |
| MUCL1         | -4.668 | 4.25E-22 | 4.80E-20 | 1     | 4     | 68    | 64    |
| MARCKS        | -1.618 | 6.74E-22 | 7.49E-20 | 836   | 905   | 3065  | 2278  |
| CTSD          | -1.549 | 7.99E-22 | 8.84E-20 | 17061 | 17852 | 57507 | 44651 |
| UGT2B15       | -1.66  | 1.44E-21 | 1.58E-19 | 210   | 226   | 706   | 672   |
| CDCA7         | -1.936 | 1.72E-21 | 1.88E-19 | 90    | 81    | 363   | 292   |
| KRT6A         | -3.606 | 2.96E-21 | 3.19E-19 | 12    | 4     | 115   | 82    |
| CRLF1         | -1.801 | 4.19E-21 | 4.48E-19 | 121   | 130   | 474   | 401   |
| CKMT1B        | -1.566 | 4.85E-21 | 5.15E-19 | 549   | 588   | 1895  | 1472  |
| SUSD3         | -2.25  | 6.08E-21 | 6.43E-19 | 42    | 47    | 237   | 187   |
| EHF           | -2.228 | 6.27E-21 | 6.61E-19 | 41    | 50    | 212   | 215   |
| SCNN1A        | -1.68  | 1.20E-20 | 1.26E-18 | 153   | 154   | 526   | 458   |
| PTHLH         | -2.964 | 1.25E-20 | 1.30E-18 | 16    | 11    | 103   | 109   |
| B3GNT5        | -2.845 | 2.52E-20 | 2.59E-18 | 18    | 24    | 181   | 122   |
| RP11-162J8.3  | -3.844 | 1.10E-19 | 1.11E-17 | 5     | 7     | 108   | 67    |
| SEMA6A        | -1.802 | 1.34E-19 | 1.34E-17 | 113   | 130   | 464   | 384   |
| U91328.2      | -1.571 | 1.52E-19 | 1.52E-17 | 182   | 170   | 534   | 512   |
| FIBCD1        | -1.498 | 1.64E-19 | 1.62E-17 | 370   | 362   | 1156  | 912   |
| MUC13         | -5.735 | 1.88E-19 | 1.85E-17 | 0     | 2     | 49    | 68    |
| SPSB4         | -2.462 | 2.00E-19 | 1.96E-17 | 30    | 23    | 166   | 127   |
| AC068580.6    | -1.67  | 2.78E-19 | 2.72E-17 | 244   | 264   | 927   | 690   |
| SLC12A2       | -1.366 | 2.96E-19 | 2.87E-17 | 2809  | 2779  | 7933  | 6470  |
| MSX2          | -1.382 | 3.28E-19 | 3.17E-17 | 853   | 858   | 2474  | 1987  |
| EMCN          | -2.752 | 4.57E-19 | 4.38E-17 | 19    | 12    | 105   | 105   |
| ANKRD62P1-PAR | -1.649 | 6.00E-19 | 5.71E-17 | 136   | 112   | 407   | 371   |
| KLK12         | -3.76  | 6.31E-19 | 5.98E-17 | 5     | 5     | 78    | 60    |
| TRIM3         | -1.475 | 6.55E-19 | 6.19E-17 | 253   | 224   | 709   | 617   |
| FAM5B         | -1.641 | 8.55E-19 | 8.02E-17 | 182   | 195   | 655   | 521   |
| FAM169A       | -1.495 | 1.45E-18 | 1.35E-16 | 217   | 186   | 592   | 544   |
| RASSF2        | -2.052 | 1.45E-18 | 1.35E-16 | 54    | 44    | 228   | 179   |
| ARSJ          | -2.007 | 1.97E-18 | 1.82E-16 | 53    | 65    | 260   | 215   |
| SALL2         | -1.662 | 3.81E-18 | 3.45E-16 | 168   | 158   | 592   | 440   |
| FAT1          | -1.302 | 4.85E-18 | 4.35E-16 | 1796  | 1826  | 4764  | 4165  |
| GRIK3         | -2.465 | 6.22E-18 | 5.52E-16 | 47    | 91    | 419   | 344   |
| 10-Sep        | -1.542 | 6.92E-18 | 6.13E-16 | 223   | 244   | 746   | 614   |
| C3            | -1.8   | 7.50E-18 | 6.61E-16 | 87    | 82    | 331   | 258   |
| CREB3L1       | -4.91  | 1.12E-17 | 9.82E-16 | 2     | 1     | 50    | 46    |

|               |        |          |          |      |      |      |      |
|---------------|--------|----------|----------|------|------|------|------|
| BAMBI         | -1.383 | 1.15E-17 | 1.00E-15 | 2273 | 2429 | 6857 | 5406 |
| MIR375        | -2.619 | 1.30E-17 | 1.12E-15 | 15   | 20   | 106  | 110  |
| C5orf4        | -1.43  | 1.67E-17 | 1.43E-15 | 406  | 435  | 1255 | 1011 |
| SERPINB5      | -2.955 | 1.92E-17 | 1.65E-15 | 16   | 14   | 146  | 88   |
| RP11-109N23.1 | -1.755 | 2.05E-17 | 1.75E-15 | 78   | 70   | 262  | 238  |
| ZFP37         | -5.48  | 2.42E-17 | 2.06E-15 | 0    | 2    | 59   | 39   |
| PSCA          | -2.118 | 3.28E-17 | 2.77E-15 | 34   | 43   | 179  | 156  |
| LRIG3         | -1.562 | 4.52E-17 | 3.79E-15 | 178  | 207  | 594  | 543  |
| DPYSL5        | -2.736 | 5.55E-17 | 4.62E-15 | 14   | 19   | 130  | 91   |
| CTTNBP2       | -8.665 | 5.82E-17 | 4.83E-15 | 0    | 0    | 35   | 46   |
| RP11-346A9.1  | -1.985 | 5.99E-17 | 4.95E-15 | 45   | 44   | 194  | 159  |
| PLCH1         | -1.772 | 6.08E-17 | 5.02E-15 | 222  | 319  | 986  | 862  |
| COL3A1        | -2.416 | 7.32E-17 | 6.01E-15 | 21   | 24   | 136  | 105  |
| HPGD          | -2.137 | 1.17E-16 | 9.52E-15 | 49   | 27   | 177  | 158  |
| TNNT1         | -1.77  | 1.21E-16 | 9.85E-15 | 138  | 178  | 612  | 466  |
| PTMS          | -1.713 | 1.22E-16 | 9.88E-15 | 388  | 426  | 1640 | 1029 |
| PKP1          | -1.481 | 1.57E-16 | 1.25E-14 | 339  | 353  | 1113 | 819  |
| SPDEF         | -1.306 | 1.63E-16 | 1.30E-14 | 2529 | 2674 | 7114 | 5749 |
| LARGE         | -1.301 | 1.66E-16 | 1.31E-14 | 1433 | 1538 | 4000 | 3323 |
| SLCO4C1       | -2.069 | 1.66E-16 | 1.31E-14 | 37   | 31   | 147  | 139  |
| ALDH3A1       | -2.001 | 1.73E-16 | 1.37E-14 | 46   | 58   | 234  | 183  |
| IKZF2         | -1.28  | 2.18E-16 | 1.71E-14 | 558  | 541  | 1465 | 1205 |
| KIAA1217      | -1.361 | 2.55E-16 | 2.00E-14 | 275  | 232  | 695  | 608  |
| ASB9          | -1.934 | 2.67E-16 | 2.08E-14 | 55   | 60   | 252  | 188  |
| ZNF583        | -2.731 | 3.62E-16 | 2.82E-14 | 12   | 16   | 88   | 99   |
| MIR205HG      | -1.942 | 4.01E-16 | 3.11E-14 | 55   | 37   | 183  | 171  |
| LMO4          | -1.405 | 6.04E-16 | 4.65E-14 | 201  | 187  | 517  | 511  |
| RHOBTB1       | -1.261 | 6.12E-16 | 4.69E-14 | 427  | 382  | 1034 | 905  |
| PALMD         | -4.311 | 6.26E-16 | 4.79E-14 | 2    | 3    | 61   | 42   |
| SLC9A3R2      | -1.333 | 6.37E-16 | 4.86E-14 | 651  | 677  | 1895 | 1450 |
| ATP11B        | -1.238 | 6.80E-16 | 5.17E-14 | 1691 | 1760 | 4390 | 3748 |
| HES2          | -1.806 | 8.94E-16 | 6.77E-14 | 75   | 91   | 328  | 253  |
| RP11-347C12.3 | -1.955 | 9.09E-16 | 6.85E-14 | 39   | 39   | 156  | 147  |
| RP13-895J2.7  | -8.592 | 1.01E-15 | 7.59E-14 | 0    | 0    | 48   | 29   |
| RP11-865I6.2  | -2.457 | 1.03E-15 | 7.76E-14 | 30   | 23   | 180  | 112  |
| HS3ST5        | -4.075 | 1.07E-15 | 7.97E-14 | 2    | 6    | 89   | 49   |
| BCYRN1        | -1.424 | 1.23E-15 | 9.16E-14 | 3172 | 3525 | 8188 | 9786 |
| TPTEP1        | -1.771 | 1.29E-15 | 9.51E-14 | 81   | 58   | 230  | 245  |
| PDGFC         | -2.311 | 1.31E-15 | 9.63E-14 | 21   | 27   | 134  | 105  |
| LRP1B         | -1.444 | 1.56E-15 | 1.14E-13 | 264  | 313  | 835  | 735  |
| IGFBP2        | -1.389 | 1.63E-15 | 1.19E-13 | 1580 | 1947 | 4886 | 4352 |

|               |        |          |          |      |      |       |       |
|---------------|--------|----------|----------|------|------|-------|-------|
| RECK          | -3.681 | 2.04E-15 | 1.47E-13 | 3    | 5    | 53    | 52    |
| ZNF365        | -1.804 | 2.19E-15 | 1.58E-13 | 61   | 48   | 208   | 173   |
| ELF5          | -1.667 | 3.34E-15 | 2.37E-13 | 74   | 72   | 251   | 213   |
| PCDH9         | -1.185 | 3.46E-15 | 2.45E-13 | 573  | 505  | 1277  | 1175  |
| OLFM1         | -1.203 | 3.46E-15 | 2.45E-13 | 947  | 875  | 2344  | 1850  |
| LPAR1         | -4.203 | 4.14E-15 | 2.91E-13 | 6    | 0    | 70    | 44    |
| 3-Sep         | -1.728 | 4.74E-15 | 3.32E-13 | 90   | 68   | 299   | 225   |
| GPR173        | -2.668 | 4.96E-15 | 3.47E-13 | 11   | 14   | 85    | 75    |
| SPOCK1        | -1.732 | 5.37E-15 | 3.73E-13 | 80   | 74   | 295   | 217   |
| IL8           | -4.441 | 8.94E-15 | 6.19E-13 | 4    | 0    | 42    | 49    |
| REEP1         | -1.499 | 9.44E-15 | 6.53E-13 | 113  | 97   | 308   | 286   |
| GPNMB         | -1.858 | 1.09E-14 | 7.50E-13 | 63   | 80   | 299   | 220   |
| A4GALT        | -1.301 | 1.11E-14 | 7.65E-13 | 387  | 384  | 1068  | 832   |
| HIST1H2BM     | -1.179 | 1.19E-14 | 8.13E-13 | 2555 | 2702 | 6183  | 5721  |
| MEGF9         | -1.2   | 1.21E-14 | 8.26E-13 | 921  | 947  | 2376  | 1917  |
| SLC29A4       | -1.358 | 1.25E-14 | 8.47E-13 | 198  | 180  | 527   | 442   |
| LEF1          | -5.095 | 1.59E-14 | 1.07E-12 | 2    | 0    | 40    | 35    |
| ONECUT1       | -1.377 | 1.73E-14 | 1.16E-12 | 191  | 198  | 547   | 464   |
| IQCK          | -1.4   | 2.61E-14 | 1.73E-12 | 186  | 197  | 556   | 455   |
| FILIP1L       | -1.259 | 3.59E-14 | 2.36E-12 | 331  | 320  | 858   | 700   |
| OR7E13P       | -1.185 | 3.79E-14 | 2.49E-12 | 646  | 623  | 1599  | 1286  |
| BMP7          | -1.16  | 3.92E-14 | 2.57E-12 | 6292 | 6536 | 15476 | 13197 |
| RTN4RL1       | -1.348 | 3.98E-14 | 2.61E-12 | 620  | 718  | 1944  | 1463  |
| STON2         | -1.166 | 4.43E-14 | 2.88E-12 | 743  | 668  | 1763  | 1404  |
| PVRL1         | -1.248 | 4.53E-14 | 2.94E-12 | 604  | 520  | 1531  | 1139  |
| RP11-129B22.6 | -1.819 | 4.63E-14 | 2.99E-12 | 43   | 45   | 169   | 142   |
| LRG1          | -2.542 | 4.95E-14 | 3.18E-12 | 11   | 23   | 97    | 102   |
| LAMB3         | -1.367 | 5.22E-14 | 3.33E-12 | 163  | 168  | 448   | 406   |
| ARNT2         | -1.326 | 5.34E-14 | 3.40E-12 | 457  | 479  | 1356  | 991   |
| SGK1          | -1.108 | 5.79E-14 | 3.68E-12 | 897  | 845  | 2018  | 1738  |
| LTBP1         | -1.195 | 6.97E-14 | 4.39E-12 | 770  | 776  | 1992  | 1548  |
| DHRS3         | -1.592 | 7.05E-14 | 4.44E-12 | 95   | 80   | 299   | 229   |
| PITX1         | -1.44  | 8.66E-14 | 5.42E-12 | 197  | 244  | 636   | 561   |
| SIM1          | -8.304 | 9.84E-14 | 6.13E-12 | 0    | 0    | 38    | 25    |
| EDARADD       | -2.956 | 9.99E-14 | 6.21E-12 | 10   | 8    | 86    | 55    |
| RP11-345J4.3  | -1.863 | 1.11E-13 | 6.89E-12 | 37   | 36   | 137   | 129   |
| TTC22         | -8.209 | 1.12E-13 | 6.91E-12 | 0    | 0    | 32    | 27    |
| NTSR1         | -2.069 | 1.75E-13 | 1.07E-11 | 47   | 36   | 215   | 134   |
| ZMAT4         | -2.222 | 1.79E-13 | 1.09E-11 | 21   | 17   | 96    | 82    |
| ANXA8L1       | -1.387 | 2.07E-13 | 1.26E-11 | 140  | 149  | 402   | 354   |
| RP11-677N16.1 | -3.663 | 2.26E-13 | 1.37E-11 | 5    | 2    | 51    | 40    |

|               |        |          |          |       |       |       |       |
|---------------|--------|----------|----------|-------|-------|-------|-------|
| SHC4          | -1.324 | 3.04E-13 | 1.82E-11 | 165   | 154   | 431   | 368   |
| ADAMTS9       | -1.214 | 3.30E-13 | 1.97E-11 | 377   | 368   | 962   | 766   |
| ST6GAL1       | -1.182 | 5.13E-13 | 3.02E-11 | 416   | 429   | 1044  | 874   |
| PRSS23        | -1.124 | 5.14E-13 | 3.03E-11 | 10929 | 11432 | 26642 | 22089 |
| TUFMP1        | -8.304 | 5.42E-13 | 3.19E-11 | 0     | 0     | 25    | 38    |
| VGF           | -1.351 | 5.53E-13 | 3.24E-11 | 218   | 164   | 543   | 432   |
| ANXA8         | -1.39  | 5.60E-13 | 3.28E-11 | 162   | 190   | 495   | 428   |
| SOWAHC        | -1.218 | 5.65E-13 | 3.30E-11 | 575   | 622   | 1566  | 1218  |
| ALG1L2        | -1.793 | 6.02E-13 | 3.51E-11 | 63    | 78    | 289   | 200   |
| CD109         | -1.456 | 6.99E-13 | 4.06E-11 | 108   | 85    | 286   | 244   |
| SLC25A1P1     | -2.49  | 7.33E-13 | 4.23E-11 | 15    | 11    | 84    | 63    |
| FAXC          | -1.803 | 8.80E-13 | 5.06E-11 | 40    | 47    | 169   | 135   |
| SLC27A6       | -1.556 | 9.18E-13 | 5.25E-11 | 106   | 135   | 343   | 366   |
| ANXA6         | -1.315 | 9.36E-13 | 5.34E-11 | 275   | 275   | 791   | 578   |
| AL603965.1    | -1.354 | 1.12E-12 | 6.36E-11 | 171   | 195   | 507   | 429   |
| INHBB         | -1.272 | 1.13E-12 | 6.39E-11 | 516   | 601   | 1523  | 1175  |
| UGT2B17       | -1.75  | 1.14E-12 | 6.45E-11 | 44    | 37    | 138   | 135   |
| AREG          | -1.199 | 1.16E-12 | 6.53E-11 | 442   | 476   | 1171  | 937   |
| DNAAF3        | -1.867 | 1.41E-12 | 7.91E-11 | 51    | 67    | 257   | 174   |
| SCML1         | -1.576 | 1.42E-12 | 7.94E-11 | 103   | 140   | 393   | 332   |
| FKBP10        | -1.595 | 1.45E-12 | 8.08E-11 | 86    | 92    | 313   | 225   |
| ITGA2         | -1.163 | 1.50E-12 | 8.34E-11 | 702   | 765   | 1822  | 1463  |
| PLA2G3        | -3.565 | 1.51E-12 | 8.39E-11 | 2     | 5     | 44    | 41    |
| ARSB          | -1.35  | 1.65E-12 | 9.11E-11 | 179   | 177   | 517   | 391   |
| MARK1         | -2.709 | 1.72E-12 | 9.48E-11 | 7     | 15    | 83    | 62    |
| ITM2C         | -1.542 | 1.75E-12 | 9.65E-11 | 93    | 116   | 336   | 273   |
| RP11-284F21.7 | -1.426 | 2.49E-12 | 1.36E-10 | 132   | 112   | 376   | 280   |
| AREGB         | -1.206 | 2.56E-12 | 1.40E-10 | 415   | 444   | 1112  | 870   |
| HSD17B12      | -1.13  | 2.83E-12 | 1.54E-10 | 488   | 522   | 1175  | 1035  |
| RP11-57A19.2  | -1.66  | 2.96E-12 | 1.61E-10 | 49    | 55    | 179   | 150   |
| MUC5AC        | -4.376 | 4.62E-12 | 2.49E-10 | 0     | 4     | 56    | 31    |
| GPRC5B        | -1.758 | 4.65E-12 | 2.51E-10 | 45    | 35    | 151   | 120   |
| C8orf48       | -3.052 | 5.17E-12 | 2.75E-10 | 8     | 4     | 47    | 54    |
| PRKAR2B       | -1.479 | 5.73E-12 | 3.05E-10 | 181   | 187   | 621   | 405   |
| TMPRSS4       | -1.314 | 6.01E-12 | 3.19E-10 | 140   | 151   | 388   | 336   |
| SNCG          | -2.46  | 6.42E-12 | 3.40E-10 | 9     | 17    | 73    | 71    |
| FAR2          | -2.265 | 6.67E-12 | 3.53E-10 | 15    | 20    | 97    | 72    |
| PCCA          | -1.498 | 6.85E-12 | 3.61E-10 | 89    | 106   | 306   | 245   |
| FRMD6         | -1.044 | 8.40E-12 | 4.41E-10 | 920   | 902   | 2069  | 1688  |
| SLC28A3       | -5.6   | 8.49E-12 | 4.44E-10 | 1     | 0     | 34    | 24    |
| RP11-161I10.1 | -4.798 | 8.49E-12 | 4.44E-10 | 2     | 0     | 32    | 29    |

|               |        |          |          |       |       |       |       |
|---------------|--------|----------|----------|-------|-------|-------|-------|
| LGALS1        | -1.117 | 8.61E-12 | 4.49E-10 | 764   | 868   | 1781  | 1758  |
| TOX3          | -7.972 | 1.06E-11 | 5.52E-10 | 0     | 0     | 28    | 22    |
| DEFB4A        | -5.524 | 1.28E-11 | 6.58E-10 | 0     | 1     | 29    | 26    |
| POC1B         | -1.06  | 1.28E-11 | 6.58E-10 | 3459  | 3580  | 8100  | 6574  |
| CYBRD1        | -2.773 | 1.37E-11 | 7.06E-10 | 7     | 12    | 79    | 52    |
| FBXO32        | -1.254 | 1.39E-11 | 7.16E-10 | 149   | 151   | 373   | 343   |
| MAPK8IP1      | -1.167 | 1.43E-11 | 7.33E-10 | 377   | 417   | 978   | 805   |
| RP11-389K14.3 | -2.035 | 1.75E-11 | 8.82E-10 | 24    | 21    | 87    | 98    |
| SEL1L3        | -1.505 | 1.77E-11 | 8.90E-10 | 135   | 182   | 509   | 391   |
| EPHA3         | -2.009 | 1.79E-11 | 8.99E-10 | 32    | 61    | 206   | 169   |
| SYT17         | -1.173 | 1.90E-11 | 9.46E-10 | 517   | 527   | 1363  | 991   |
| RPRM          | -1.546 | 2.19E-11 | 1.09E-09 | 69    | 48    | 176   | 166   |
| EXPH5         | -1.11  | 2.30E-11 | 1.14E-09 | 715   | 656   | 1710  | 1250  |
| CAPN13        | -1.386 | 2.30E-11 | 1.14E-09 | 97    | 111   | 278   | 266   |
| TP63          | -1.513 | 2.41E-11 | 1.19E-09 | 139   | 82    | 347   | 284   |
| RP11-744O11.2 | -7.883 | 2.50E-11 | 1.23E-09 | 0     | 0     | 24    | 23    |
| CXXC4         | -1.761 | 2.70E-11 | 1.33E-09 | 35    | 51    | 151   | 141   |
| KCNH2         | -1.486 | 2.76E-11 | 1.35E-09 | 64    | 74    | 201   | 186   |
| MYO10         | -1.122 | 2.81E-11 | 1.38E-09 | 789   | 774   | 1979  | 1424  |
| RP11-1C8.4    | -2.527 | 2.92E-11 | 1.42E-09 | 14    | 7     | 58    | 64    |
| PEG10         | -7.883 | 2.92E-11 | 1.42E-09 | 0     | 0     | 23    | 24    |
| KDEL1C1       | -1.519 | 3.15E-11 | 1.53E-09 | 59    | 64    | 175   | 178   |
| CD36          | -1.213 | 3.24E-11 | 1.57E-09 | 191   | 210   | 486   | 444   |
| FOXD1         | -1.402 | 3.44E-11 | 1.66E-09 | 114   | 80    | 280   | 233   |
| EGR1          | -1.37  | 3.58E-11 | 1.72E-09 | 122   | 132   | 373   | 284   |
| CP            | -2.202 | 3.72E-11 | 1.78E-09 | 21    | 11    | 78    | 70    |
| SNAI2         | -4.844 | 3.78E-11 | 1.81E-09 | 2     | 0     | 39    | 24    |
| S100A2        | -2.721 | 3.85E-11 | 1.83E-09 | 9     | 6     | 50    | 50    |
| PRAME         | -4     | 4.32E-11 | 2.05E-09 | 4     | 0     | 36    | 31    |
| TFF1          | -1.071 | 4.89E-11 | 2.31E-09 | 22389 | 24924 | 54369 | 45061 |
| TSKU          | -1.112 | 4.89E-11 | 2.31E-09 | 1412  | 1616  | 3638  | 2909  |
| TNFSF10       | -1.528 | 5.37E-11 | 2.53E-09 | 157   | 232   | 627   | 495   |
| NGFRAP1       | -1.004 | 5.37E-11 | 2.53E-09 | 3970  | 4054  | 8727  | 7361  |
| CDH13         | -1.877 | 6.56E-11 | 3.07E-09 | 38    | 25    | 136   | 96    |
| CARD10        | -1.146 | 7.05E-11 | 3.29E-09 | 201   | 193   | 446   | 426   |
| CSRP2         | -1.567 | 7.10E-11 | 3.31E-09 | 50    | 44    | 151   | 128   |
| CBLB          | -1.083 | 7.15E-11 | 3.32E-09 | 342   | 329   | 780   | 642   |
| HIST1H3I      | -1.036 | 7.30E-11 | 3.38E-09 | 1509  | 1657  | 3259  | 3232  |
| CT62          | -1.355 | 7.33E-11 | 3.39E-09 | 102   | 120   | 289   | 279   |
| KCNH3         | -1.914 | 7.42E-11 | 3.43E-09 | 22    | 28    | 94    | 95    |
| TMTC1         | -1.3   | 7.51E-11 | 3.46E-09 | 312   | 302   | 915   | 597   |

|               |        |          |          |     |     |      |      |
|---------------|--------|----------|----------|-----|-----|------|------|
| SLC2A10       | -1.086 | 7.98E-11 | 3.67E-09 | 868 | 855 | 2121 | 1537 |
| RP11-225N10.1 | -5.807 | 8.47E-11 | 3.87E-09 | 0   | 1   | 47   | 20   |
| LRRC10B       | -1.265 | 8.50E-11 | 3.88E-09 | 161 | 166 | 444  | 342  |
| DLX1          | -1.243 | 8.66E-11 | 3.94E-09 | 164 | 182 | 446  | 373  |
| FIGN          | -1.034 | 8.75E-11 | 3.98E-09 | 465 | 461 | 1027 | 869  |
| TMCC3         | -1.12  | 9.72E-11 | 4.40E-09 | 262 | 275 | 620  | 547  |
| ZNF880        | -1.168 | 9.83E-11 | 4.45E-09 | 170 | 156 | 379  | 354  |
| FBLN2         | -3.565 | 1.06E-10 | 4.77E-09 | 6   | 1   | 35   | 50   |
| ARMCX2        | -1.057 | 1.22E-10 | 5.51E-09 | 734 | 832 | 1746 | 1513 |
| DGKG          | -1.695 | 1.61E-10 | 7.18E-09 | 38  | 44  | 153  | 113  |
| DLG4          | -1.628 | 1.73E-10 | 7.72E-09 | 47  | 48  | 171  | 123  |
| HS6ST3        | -1.173 | 1.76E-10 | 7.86E-09 | 249 | 220 | 605  | 453  |
| ZFP82         | -7.852 | 2.07E-10 | 9.15E-09 | 0   | 0   | 28   | 18   |
| RP11-393B14.1 | -1.292 | 2.24E-10 | 9.88E-09 | 108 | 119 | 299  | 257  |
| FGFR1         | -1.343 | 2.63E-10 | 1.16E-08 | 159 | 157 | 479  | 323  |
| FAM19A5       | -1.44  | 2.73E-10 | 1.20E-08 | 89  | 114 | 309  | 242  |
| ASPH          | -1.009 | 2.84E-10 | 1.24E-08 | 489 | 421 | 1008 | 823  |
| GBE1          | -1.006 | 3.50E-10 | 1.52E-08 | 523 | 524 | 1151 | 952  |
| LMOD3         | -3.501 | 3.64E-10 | 1.58E-08 | 2   | 4   | 41   | 29   |
| KREMEN2       | -1.265 | 3.69E-10 | 1.60E-08 | 104 | 96  | 261  | 220  |
| SUSD2         | -1.743 | 3.84E-10 | 1.65E-08 | 80  | 68  | 320  | 176  |
| LINC00284     | -1.583 | 3.90E-10 | 1.68E-08 | 46  | 53  | 169  | 128  |
| ASMTL         | -1.086 | 4.07E-10 | 1.75E-08 | 412 | 454 | 1020 | 819  |
| CHST8         | -1.235 | 4.43E-10 | 1.90E-08 | 140 | 153 | 380  | 310  |
| KLK8          | -3.865 | 5.07E-10 | 2.16E-08 | 3   | 1   | 35   | 26   |
| TFPI2         | -1.21  | 5.10E-10 | 2.17E-08 | 238 | 279 | 675  | 521  |
| MTFP1         | -1.004 | 5.61E-10 | 2.38E-08 | 751 | 811 | 1717 | 1416 |
| STEAP4        | -1.859 | 5.78E-10 | 2.44E-08 | 29  | 18  | 93   | 78   |
| FAM178B       | -1.378 | 7.20E-10 | 3.02E-08 | 121 | 157 | 410  | 313  |
| RAB36         | -2.446 | 8.05E-10 | 3.36E-08 | 8   | 10  | 54   | 45   |
| ARHGEF38      | -2.226 | 8.60E-10 | 3.57E-08 | 12  | 12  | 62   | 51   |
| PTPRN2        | -3.339 | 9.03E-10 | 3.74E-08 | 3   | 7   | 70   | 33   |
| TNIK          | -1.365 | 9.13E-10 | 3.77E-08 | 67  | 61  | 173  | 157  |
| CAMK2N1       | -1.146 | 9.74E-10 | 4.00E-08 | 270 | 293 | 710  | 536  |
| CTA-714B7.5   | -1.934 | 1.11E-09 | 4.50E-08 | 17  | 25  | 82   | 79   |
| ZMYND10       | -1.895 | 1.15E-09 | 4.69E-08 | 20  | 21  | 77   | 76   |
| PADI3         | -2.486 | 1.16E-09 | 4.71E-08 | 14  | 6   | 67   | 46   |
| KCTD17        | -1.913 | 1.19E-09 | 4.80E-08 | 22  | 23  | 99   | 71   |
| GAS6          | -1.344 | 1.27E-09 | 5.11E-08 | 77  | 84  | 226  | 183  |
| LMO3          | -1.619 | 1.29E-09 | 5.20E-08 | 34  | 45  | 127  | 116  |
| ZNF488        | -1.433 | 1.32E-09 | 5.32E-08 | 68  | 93  | 231  | 204  |

|               |        |          |          |     |     |      |      |
|---------------|--------|----------|----------|-----|-----|------|------|
| WNT5A         | -2.287 | 1.42E-09 | 5.69E-08 | 16  | 7   | 58   | 55   |
| HOXA13        | -1.773 | 1.64E-09 | 6.54E-08 | 27  | 22  | 90   | 78   |
| SPRED1        | -1.096 | 1.75E-09 | 6.95E-08 | 218 | 230 | 524  | 434  |
| ABCC2         | -1.723 | 1.76E-09 | 6.97E-08 | 33  | 22  | 91   | 91   |
| CBLN4         | -7.615 | 1.83E-09 | 7.23E-08 | 0   | 0   | 22   | 17   |
| PROSAPIP1     | -1.198 | 2.20E-09 | 8.66E-08 | 121 | 109 | 292  | 236  |
| CCNO          | -2.255 | 2.26E-09 | 8.90E-08 | 34  | 79  | 341  | 199  |
| RP11-195F19.9 | -1.529 | 2.56E-09 | 9.96E-08 | 52  | 66  | 198  | 143  |
| DEFB4B        | -5.17  | 2.64E-09 | 1.03E-07 | 0   | 1   | 22   | 21   |
| NTN1          | -1.003 | 2.69E-09 | 1.04E-07 | 263 | 237 | 526  | 476  |
| COL4A6        | -1.436 | 2.93E-09 | 1.13E-07 | 57  | 43  | 147  | 124  |
| FOLR1         | -2.111 | 2.95E-09 | 1.14E-07 | 13  | 13  | 61   | 52   |
| AFF3          | -1.467 | 3.18E-09 | 1.22E-07 | 71  | 58  | 157  | 200  |
| FOXI3         | -3.625 | 3.20E-09 | 1.23E-07 | 11  | 0   | 96   | 42   |
| KIF12         | -2.126 | 3.25E-09 | 1.24E-07 | 21  | 54  | 178  | 150  |
| RP11-260A9.6  | -7.721 | 3.28E-09 | 1.25E-07 | 0   | 0   | 27   | 15   |
| DOCK10        | -1.173 | 3.32E-09 | 1.26E-07 | 138 | 104 | 287  | 259  |
| ITGA6         | -1.098 | 3.56E-09 | 1.35E-07 | 294 | 346 | 752  | 618  |
| KLF12         | -1.167 | 3.61E-09 | 1.37E-07 | 192 | 161 | 460  | 333  |
| RP11-18B16.2  | -5.328 | 3.70E-09 | 1.40E-07 | 1   | 0   | 31   | 17   |
| LINC00478     | -1.224 | 3.72E-09 | 1.40E-07 | 90  | 88  | 210  | 206  |
| CTXN1         | -1.181 | 3.83E-09 | 1.44E-07 | 126 | 139 | 326  | 275  |
| IL20RA        | -2.602 | 4.23E-09 | 1.58E-07 | 8   | 6   | 50   | 36   |
| IFT57         | -1.004 | 4.26E-09 | 1.59E-07 | 447 | 508 | 1023 | 893  |
| PYGO1         | -2.046 | 4.54E-09 | 1.69E-07 | 12  | 22  | 74   | 67   |
| HRNR          | -3.122 | 5.56E-09 | 2.05E-07 | 0   | 12  | 56   | 50   |
| MAF           | -1.422 | 5.98E-09 | 2.19E-07 | 47  | 51  | 139  | 124  |
| ZNF618        | -1.038 | 6.41E-09 | 2.34E-07 | 387 | 424 | 938  | 727  |
| LIMA1         | -1.032 | 6.43E-09 | 2.34E-07 | 532 | 628 | 1308 | 1065 |
| ZNF559        | -1.227 | 6.66E-09 | 2.42E-07 | 107 | 77  | 229  | 202  |
| RASGEF1B      | -1.106 | 7.94E-09 | 2.87E-07 | 136 | 125 | 301  | 261  |
| RHOH          | -1.876 | 8.32E-09 | 3.00E-07 | 24  | 14  | 76   | 64   |
| RP11-347E10.1 | -1.064 | 8.45E-09 | 3.04E-07 | 505 | 627 | 1296 | 1071 |
| PLAGL1        | -2.049 | 8.88E-09 | 3.19E-07 | 12  | 27  | 87   | 75   |
| MEIS1         | -1.093 | 8.93E-09 | 3.20E-07 | 353 | 403 | 928  | 685  |
| ADRB1         | -1.521 | 9.24E-09 | 3.30E-07 | 37  | 50  | 132  | 118  |
| RP1-212P9.2   | -7.651 | 9.87E-09 | 3.51E-07 | 0   | 0   | 15   | 25   |
| SYN3          | -4.028 | 1.09E-08 | 3.83E-07 | 2   | 1   | 32   | 20   |
| TPK1          | -1.247 | 1.16E-08 | 4.07E-07 | 77  | 75  | 177  | 184  |
| TNFRSF11B     | -1.179 | 1.21E-08 | 4.24E-07 | 99  | 97  | 241  | 203  |
| TRPC6         | -1.791 | 1.27E-08 | 4.45E-07 | 27  | 48  | 119  | 141  |



|               |        |          |          |     |     |     |     |
|---------------|--------|----------|----------|-----|-----|-----|-----|
| PDE10A        | -3.742 | 1.34E-08 | 4.67E-07 | 2   | 2   | 35  | 21  |
| ELOVL2-AS1    | -1.62  | 1.37E-08 | 4.75E-07 | 38  | 65  | 166 | 151 |
| DENND5B       | -1.105 | 1.39E-08 | 4.82E-07 | 246 | 264 | 635 | 462 |
| IGHE          | -1.596 | 1.44E-08 | 4.99E-07 | 36  | 31  | 93  | 110 |
| TTC12         | -1.292 | 1.48E-08 | 5.10E-07 | 71  | 80  | 205 | 165 |
| RNF157        | -1.739 | 1.48E-08 | 5.11E-07 | 55  | 68  | 268 | 143 |
| AC009336.1    | -2.783 | 1.51E-08 | 5.22E-07 | 6   | 4   | 39  | 31  |
| NR2F1         | -3.111 | 1.52E-08 | 5.23E-07 | 4   | 3   | 28  | 34  |
| MIR203        | -1.553 | 1.69E-08 | 5.80E-07 | 30  | 37  | 102 | 95  |
| RP11-210M15.2 | -1.993 | 1.77E-08 | 6.03E-07 | 12  | 19  | 63  | 61  |
| TNS4          | -1.895 | 1.93E-08 | 6.56E-07 | 15  | 19  | 67  | 60  |
| RP11-61L23.2  | -1.116 | 2.03E-08 | 6.87E-07 | 137 | 155 | 321 | 312 |
| PRSS16        | -1.439 | 2.19E-08 | 7.37E-07 | 56  | 35  | 133 | 114 |
| SOBP          | -2.571 | 2.71E-08 | 9.02E-07 | 15  | 2   | 51  | 51  |
| AC144450.1    | -1.06  | 2.85E-08 | 9.48E-07 | 137 | 131 | 285 | 274 |
| CYB561D2      | -1.006 | 2.93E-08 | 9.74E-07 | 270 | 309 | 607 | 556 |
| AC135776.1    | -2.184 | 2.99E-08 | 9.90E-07 | 11  | 19  | 57  | 80  |
| RUNX1T1       | -2.034 | 3.10E-08 | 1.02E-06 | 12  | 13  | 56  | 47  |
| ZCCHC11       | -1.14  | 3.29E-08 | 1.08E-06 | 96  | 94  | 219 | 200 |
| PABPC1L2B     | -2.972 | 3.33E-08 | 1.10E-06 | 5   | 4   | 46  | 26  |
| GNB4          | -1.193 | 3.38E-08 | 1.11E-06 | 131 | 88  | 276 | 225 |
| NMNAT2        | -1.193 | 3.89E-08 | 1.27E-06 | 91  | 93  | 201 | 220 |
| RP11-214O1.2  | -1.535 | 4.00E-08 | 1.29E-06 | 45  | 76  | 186 | 165 |
| RP11-830F9.7  | -1.333 | 4.07E-08 | 1.31E-06 | 72  | 87  | 233 | 168 |
| SORL1         | -1.066 | 4.15E-08 | 1.34E-06 | 195 | 156 | 417 | 318 |
| KLK10         | -2.972 | 4.40E-08 | 1.42E-06 | 5   | 4   | 28  | 44  |
| AP000330.8    | -3.154 | 4.53E-08 | 1.45E-06 | 2   | 4   | 27  | 28  |
| ZNF256        | -1.035 | 4.54E-08 | 1.45E-06 | 233 | 258 | 561 | 445 |
| AL391421.1    | -1.651 | 4.59E-08 | 1.47E-06 | 28  | 47  | 132 | 104 |
| BAI2          | -1.503 | 4.64E-08 | 1.48E-06 | 37  | 56  | 143 | 121 |
| RP4-813D12.3  | -2.643 | 4.73E-08 | 1.51E-06 | 4   | 8   | 45  | 31  |
| DENND1A       | -1.009 | 5.18E-08 | 1.64E-06 | 225 | 256 | 498 | 470 |
| RP11-422N16.3 | -7.577 | 5.26E-08 | 1.66E-06 | 0   | 0   | 13  | 25  |
| SLC14A1       | -2.325 | 5.82E-08 | 1.83E-06 | 9   | 7   | 45  | 36  |
| RP4-625H18.2  | -1.203 | 5.94E-08 | 1.86E-06 | 106 | 138 | 301 | 261 |
| C3orf70       | -1.133 | 6.36E-08 | 1.99E-06 | 105 | 121 | 263 | 233 |
| OPRD1         | -2.68  | 6.61E-08 | 2.06E-06 | 3   | 9   | 44  | 34  |
| PABPC1L2A     | -2.728 | 6.61E-08 | 2.06E-06 | 7   | 4   | 46  | 28  |
| HMOX1         | -1.017 | 6.89E-08 | 2.14E-06 | 186 | 186 | 419 | 334 |
| SLC2A12       | -1.207 | 7.46E-08 | 2.30E-06 | 90  | 87  | 237 | 172 |
| KLK13         | -7.5   | 7.75E-08 | 2.39E-06 | 0   | 0   | 24  | 12  |

|               |        |          |          |     |     |     |     |
|---------------|--------|----------|----------|-----|-----|-----|-----|
| RP11-153K16.1 | -3.382 | 8.16E-08 | 2.50E-06 | 0   | 5   | 29  | 25  |
| NXN           | -1.07  | 8.63E-08 | 2.63E-06 | 156 | 152 | 369 | 278 |
| C16orf62      | -1.022 | 8.77E-08 | 2.67E-06 | 194 | 222 | 452 | 393 |
| EEFSEC        | -1.044 | 1.05E-07 | 3.18E-06 | 183 | 198 | 443 | 343 |
| KIT           | -1.498 | 1.06E-07 | 3.19E-06 | 34  | 31  | 104 | 80  |
| TMPRSS3       | -1.254 | 1.10E-07 | 3.30E-06 | 145 | 176 | 463 | 303 |
| CPE           | -1.033 | 1.25E-07 | 3.72E-06 | 223 | 271 | 545 | 466 |
| RNASE4        | -1.657 | 1.27E-07 | 3.77E-06 | 26  | 49  | 127 | 110 |
| GK            | -1.202 | 1.32E-07 | 3.90E-06 | 66  | 73  | 170 | 150 |
| EGFR          | -1.126 | 1.48E-07 | 4.32E-06 | 123 | 144 | 327 | 256 |
| CHRM1         | -2.471 | 1.63E-07 | 4.74E-06 | 8   | 5   | 33  | 40  |
| RP11-145G20.1 | -1.217 | 1.80E-07 | 5.20E-06 | 96  | 131 | 261 | 267 |
| DNAJB5        | -1.134 | 1.82E-07 | 5.26E-06 | 113 | 138 | 303 | 248 |
| F7            | -2.676 | 1.88E-07 | 5.41E-06 | 8   | 2   | 34  | 31  |
| PITPNM3       | -1.341 | 1.93E-07 | 5.54E-06 | 82  | 71  | 240 | 148 |
| RP11-206M11.7 | -1.831 | 2.01E-07 | 5.74E-06 | 18  | 17  | 74  | 51  |
| DAPK1         | -1.881 | 2.09E-07 | 5.95E-06 | 13  | 14  | 52  | 48  |
| SOWAHA        | -2.073 | 2.26E-07 | 6.39E-06 | 13  | 8   | 43  | 46  |
| HMGB3P14      | -1.272 | 2.29E-07 | 6.47E-06 | 55  | 43  | 126 | 111 |
| AC021218.2    | -2.395 | 2.32E-07 | 6.55E-06 | 4   | 12  | 43  | 42  |
| KCNH1         | -2.654 | 2.40E-07 | 6.76E-06 | 6   | 4   | 28  | 36  |
| KDELCP1       | -1.814 | 2.50E-07 | 7.02E-06 | 19  | 13  | 53  | 60  |
| FBXO15        | -2.271 | 2.93E-07 | 8.16E-06 | 8   | 8   | 46  | 32  |
| MAPK10        | -1.264 | 3.34E-07 | 9.16E-06 | 52  | 42  | 115 | 111 |
| PGBD5         | -1.312 | 3.52E-07 | 9.59E-06 | 46  | 63  | 141 | 130 |
| TFAP2B        | -7.19  | 3.55E-07 | 9.66E-06 | 0   | 0   | 13  | 16  |
| SIGLEC15      | -1.124 | 3.71E-07 | 1.01E-05 | 186 | 263 | 513 | 466 |
| ZNF608        | -2.608 | 3.76E-07 | 1.02E-05 | 3   | 7   | 33  | 29  |
| TEX14         | -1.136 | 3.76E-07 | 1.02E-05 | 92  | 69  | 197 | 157 |
| RUNDC3B       | -1.298 | 3.77E-07 | 1.02E-05 | 80  | 48  | 179 | 136 |
| NPY5R         | -2.122 | 3.79E-07 | 1.02E-05 | 10  | 8   | 40  | 39  |
| FAM43A        | -1.047 | 3.81E-07 | 1.03E-05 | 135 | 121 | 302 | 227 |
| ETV4          | -2.006 | 3.82E-07 | 1.03E-05 | 14  | 8   | 45  | 44  |
| APCDD1        | -1.614 | 4.48E-07 | 1.19E-05 | 20  | 22  | 68  | 61  |
| RP11-317J10.2 | -2.648 | 5.42E-07 | 1.42E-05 | 2   | 9   | 35  | 35  |
| TMEM31        | -5.203 | 5.58E-07 | 1.46E-05 | 0   | 1   | 33  | 11  |
| GNAZ          | -1.195 | 5.66E-07 | 1.48E-05 | 229 | 331 | 753 | 529 |
| CCDC110       | -1.846 | 5.97E-07 | 1.55E-05 | 14  | 12  | 50  | 44  |
| AMMECR1LP1    | -2.072 | 6.05E-07 | 1.57E-05 | 10  | 21  | 82  | 49  |
| KCNN4         | -1.013 | 6.26E-07 | 1.62E-05 | 112 | 106 | 236 | 204 |
| PDZK1         | -1.085 | 7.07E-07 | 1.81E-05 | 124 | 161 | 319 | 286 |

|                |        |          |          |     |     |     |     |
|----------------|--------|----------|----------|-----|-----|-----|-----|
| SPOCD1         | -1.043 | 7.44E-07 | 1.89E-05 | 96  | 81  | 192 | 173 |
| SLC22A17       | -1.014 | 7.46E-07 | 1.89E-05 | 138 | 100 | 258 | 223 |
| CLCA2          | -1.929 | 7.93E-07 | 2.01E-05 | 16  | 13  | 70  | 41  |
| SOX9           | -1.046 | 8.36E-07 | 2.11E-05 | 130 | 116 | 294 | 214 |
| RP11-347D21.4  | -1.007 | 8.52E-07 | 2.15E-05 | 158 | 140 | 346 | 253 |
| TTLL11         | -1.457 | 9.14E-07 | 2.28E-05 | 38  | 50  | 104 | 138 |
| HOXD-AS1       | -1.492 | 1.01E-06 | 2.50E-05 | 25  | 25  | 76  | 65  |
| RP11-124N14.3  | -3.721 | 1.07E-06 | 2.64E-05 | 1   | 2   | 27  | 15  |
| STRA6          | -1.918 | 1.09E-06 | 2.68E-05 | 17  | 8   | 54  | 41  |
| ZIC3           | -1.675 | 1.14E-06 | 2.78E-05 | 20  | 14  | 60  | 49  |
| C10orf107      | -2.959 | 1.18E-06 | 2.88E-05 | 3   | 3   | 21  | 27  |
| PIK3C2G        | -3.363 | 1.20E-06 | 2.92E-05 | 4   | 0   | 20  | 23  |
| TH             | -2.35  | 1.23E-06 | 2.98E-05 | 6   | 6   | 31  | 31  |
| RP11-22P6.3    | -2.038 | 1.32E-06 | 3.17E-05 | 16  | 6   | 42  | 49  |
| RP11-483P21.2  | -2.058 | 1.36E-06 | 3.24E-05 | 12  | 21  | 91  | 47  |
| RP11-1223D19.1 | -1.443 | 1.36E-06 | 3.24E-05 | 28  | 30  | 90  | 68  |
| SMOC2          | -1.452 | 1.40E-06 | 3.33E-05 | 40  | 37  | 131 | 80  |
| CDC42EP3       | -1.863 | 1.44E-06 | 3.42E-05 | 10  | 19  | 52  | 54  |
| BAG2           | -1.006 | 1.45E-06 | 3.43E-05 | 160 | 193 | 395 | 314 |
| DNAH7          | -1.204 | 1.72E-06 | 4.04E-05 | 48  | 53  | 126 | 107 |
| MYEOV          | -1.52  | 1.73E-06 | 4.06E-05 | 28  | 50  | 127 | 97  |
| OSCP1          | -1.413 | 1.75E-06 | 4.11E-05 | 32  | 49  | 103 | 113 |
| AP002348.1     | -2.773 | 1.81E-06 | 4.24E-05 | 3   | 4   | 27  | 22  |
| PDLIM3         | -3.3   | 1.85E-06 | 4.31E-05 | 5   | 0   | 33  | 18  |
| Z83851.1       | -3.615 | 1.96E-06 | 4.56E-05 | 0   | 3   | 17  | 22  |
| ANK1           | -1.256 | 1.98E-06 | 4.60E-05 | 47  | 58  | 143 | 108 |
| PPP1R14C       | -2.234 | 2.05E-06 | 4.74E-05 | 13  | 3   | 39  | 37  |
| HMGCS2         | -7.033 | 2.08E-06 | 4.80E-05 | 0   | 0   | 11  | 15  |
| ELOVL3         | -2.004 | 2.13E-06 | 4.92E-05 | 9   | 24  | 80  | 53  |
| LL22NC03-104C7 | -2.532 | 2.58E-06 | 5.87E-05 | 4   | 5   | 29  | 24  |
| MRAS           | -1.091 | 2.62E-06 | 5.95E-05 | 88  | 111 | 235 | 189 |
| OLFM2          | -1.227 | 2.72E-06 | 6.17E-05 | 67  | 41  | 142 | 111 |
| AL583842.3     | -1.189 | 2.74E-06 | 6.19E-05 | 58  | 48  | 139 | 103 |
| RP11-27K13.3   | -1.41  | 2.74E-06 | 6.19E-05 | 47  | 24  | 105 | 84  |
| DTX4           | -1.059 | 2.75E-06 | 6.22E-05 | 94  | 107 | 196 | 223 |
| SLC43A1        | -1.794 | 2.82E-06 | 6.35E-05 | 15  | 16  | 46  | 62  |
| FSCN1          | -1.053 | 3.09E-06 | 6.94E-05 | 144 | 187 | 390 | 297 |
| LINC00665      | -1.098 | 3.15E-06 | 7.05E-05 | 63  | 70  | 154 | 131 |
| CLIC6          | -2.243 | 3.33E-06 | 7.38E-05 | 7   | 7   | 41  | 26  |
| RGAG1          | -2.378 | 3.85E-06 | 8.46E-05 | 8   | 3   | 32  | 26  |
| FSD1           | -1.447 | 3.94E-06 | 8.63E-05 | 26  | 41  | 103 | 80  |

|                |        |          |          |    |     |     |     |
|----------------|--------|----------|----------|----|-----|-----|-----|
| SPRY1          | -1.198 | 4.53E-06 | 9.77E-05 | 42 | 49  | 110 | 99  |
| CHST11         | -1.279 | 4.63E-06 | 9.96E-05 | 99 | 123 | 344 | 195 |
| MIR148A        | -1.73  | 4.79E-06 | 0.000103 | 13 | 14  | 51  | 39  |
| C17orf97       | -1.073 | 4.84E-06 | 0.000103 | 85 | 96  | 220 | 161 |
| FLJ27352       | -1.315 | 5.06E-06 | 0.000108 | 35 | 28  | 76  | 81  |
| SH3TC2         | -1.159 | 5.68E-06 | 0.00012  | 45 | 44  | 102 | 97  |
| PCOLCE2        | -3.222 | 6.13E-06 | 0.000128 | 4  | 0   | 18  | 21  |
| ACE2           | -2.41  | 6.59E-06 | 0.000137 | 3  | 7   | 29  | 25  |
| PLEKHS1        | -2.378 | 7.53E-06 | 0.000155 | 9  | 2   | 32  | 26  |
| GPR39          | -1.079 | 8.44E-06 | 0.000172 | 86 | 108 | 236 | 174 |
| RP11-493K23.1  | -3.826 | 8.90E-06 | 0.000181 | 2  | 0   | 14  | 17  |
| AMBP           | -3.779 | 1.12E-05 | 0.000222 | 0  | 2   | 15  | 15  |
| SNCB           | -3.375 | 1.17E-05 | 0.00023  | 1  | 2   | 19  | 14  |
| GLIPR2         | -1.356 | 1.18E-05 | 0.00023  | 46 | 73  | 185 | 120 |
| LINC00327      | -4.448 | 1.19E-05 | 0.000232 | 1  | 0   | 13  | 13  |
| RP11-1286E23.1 | -2.561 | 1.24E-05 | 0.000241 | 1  | 9   | 32  | 28  |
| RP11-127O4.3   | -3.826 | 1.24E-05 | 0.000242 | 2  | 0   | 13  | 18  |
| MIR30C2        | -3.779 | 1.28E-05 | 0.000247 | 2  | 0   | 14  | 16  |
| AC084125.1     | -1.746 | 1.33E-05 | 0.000255 | 11 | 13  | 38  | 43  |
| DACT3          | -2.115 | 1.45E-05 | 0.000277 | 8  | 5   | 30  | 27  |
| CTA-392C11.2   | -1.145 | 1.46E-05 | 0.000278 | 46 | 57  | 127 | 101 |
| HAR1B          | -1.779 | 1.46E-05 | 0.000278 | 11 | 11  | 36  | 40  |
| CTHRC1         | -1.518 | 1.64E-05 | 0.000308 | 19 | 35  | 91  | 64  |
| RAI2           | -1.47  | 1.68E-05 | 0.000315 | 21 | 24  | 55  | 70  |
| FAM149A        | -1.282 | 1.69E-05 | 0.000317 | 32 | 39  | 101 | 72  |
| FREM1          | -2.698 | 1.81E-05 | 0.000339 | 8  | 0   | 31  | 22  |
| CENPC1P1       | -2.178 | 1.87E-05 | 0.000348 | 8  | 4   | 25  | 30  |
| RP11-567G11.1  | -1.13  | 1.88E-05 | 0.000349 | 52 | 42  | 118 | 88  |
| APOBR          | -1.857 | 1.95E-05 | 0.000361 | 10 | 10  | 44  | 29  |
| AC104655.3     | -1.214 | 2.03E-05 | 0.000375 | 33 | 35  | 86  | 72  |
| IL17REL        | -2.661 | 2.12E-05 | 0.000388 | 3  | 3   | 21  | 18  |
| GNAQP1         | -1.085 | 2.13E-05 | 0.000389 | 54 | 59  | 136 | 104 |
| DCPS           | -1.066 | 2.17E-05 | 0.000396 | 79 | 68  | 185 | 123 |
| RP1-310O13.12  | -2.869 | 2.21E-05 | 0.000403 | 0  | 9   | 43  | 24  |
| KRT6B          | -2.697 | 2.29E-05 | 0.000415 | 5  | 1   | 20  | 20  |
| RNU4-4P        | -1.063 | 2.30E-05 | 0.000416 | 63 | 46  | 126 | 102 |
| BEX5           | -1.771 | 2.33E-05 | 0.000421 | 14 | 9   | 34  | 45  |
| INPP5D         | -3.147 | 2.36E-05 | 0.000426 | 4  | 0   | 22  | 15  |
| NYAP2          | -2.359 | 2.37E-05 | 0.000427 | 4  | 5   | 26  | 21  |
| LHX6           | -1.023 | 2.40E-05 | 0.000431 | 67 | 50  | 121 | 117 |
| RP11-247A12.2  | -2.27  | 2.57E-05 | 0.000457 | 6  | 4   | 27  | 22  |

|               |        |          |          |    |     |     |     |
|---------------|--------|----------|----------|----|-----|-----|-----|
| LAMP3         | -1.838 | 2.59E-05 | 0.000461 | 8  | 12  | 42  | 30  |
| FOSL1         | -1.458 | 2.60E-05 | 0.000461 | 22 | 15  | 57  | 45  |
| FAM83E        | -1.129 | 2.72E-05 | 0.000481 | 42 | 42  | 88  | 96  |
| GABBR2        | -1.388 | 2.77E-05 | 0.00049  | 22 | 18  | 55  | 50  |
| STK32A        | -2.983 | 3.07E-05 | 0.000534 | 2  | 2   | 17  | 16  |
| FYB           | -6.658 | 3.19E-05 | 0.000552 | 0  | 0   | 11  | 9   |
| RP11-273G15.2 | -1.652 | 3.22E-05 | 0.000558 | 14 | 11  | 45  | 34  |
| C1orf127      | -6.658 | 3.63E-05 | 0.00062  | 0  | 0   | 9   | 11  |
| HPD           | -1.458 | 3.72E-05 | 0.000634 | 23 | 14  | 58  | 44  |
| CLDN1         | -1.086 | 3.84E-05 | 0.000651 | 47 | 57  | 123 | 98  |
| RP11-262H14.7 | -1.692 | 4.22E-05 | 0.00071  | 13 | 11  | 47  | 31  |
| RP11-150O12.3 | -1.194 | 4.24E-05 | 0.000713 | 64 | 53  | 171 | 97  |
| KLF15         | -1.894 | 4.25E-05 | 0.000713 | 7  | 9   | 28  | 32  |
| KIAA1239      | -3.628 | 4.39E-05 | 0.000734 | 2  | 0   | 15  | 12  |
| GJA1          | -2.165 | 4.60E-05 | 0.000765 | 5  | 8   | 38  | 21  |
| PEX11G        | -1.012 | 4.64E-05 | 0.00077  | 59 | 46  | 107 | 105 |
| FAM81A        | -1.239 | 4.69E-05 | 0.000777 | 27 | 36  | 82  | 67  |
| RAB39A        | -1.751 | 4.90E-05 | 0.00081  | 19 | 7   | 53  | 35  |
| MAPRE2        | -1.081 | 5.13E-05 | 0.000843 | 72 | 109 | 213 | 170 |
| LDHB          | -1.962 | 5.17E-05 | 0.000847 | 10 | 5   | 34  | 25  |
| NPW           | -2.445 | 5.65E-05 | 0.000918 | 4  | 3   | 19  | 20  |
| RP1-102D24.5  | -1.596 | 5.70E-05 | 0.000926 | 12 | 15  | 41  | 41  |
| ATP6V0D2      | -2.213 | 5.80E-05 | 0.00094  | 5  | 8   | 41  | 20  |
| SARDH         | -1.779 | 5.83E-05 | 0.000942 | 8  | 14  | 44  | 32  |
| VEGFC         | -1.424 | 6.10E-05 | 0.000979 | 18 | 24  | 66  | 47  |
| SLC13A3       | -1.137 | 6.30E-05 | 0.00101  | 35 | 34  | 82  | 70  |
| JAKMIP1       | -1.293 | 6.49E-05 | 0.00103  | 23 | 23  | 58  | 55  |
| AKR1B10       | -2.366 | 6.72E-05 | 0.00107  | 10 | 4   | 53  | 20  |
| TIGD3         | -1.01  | 6.73E-05 | 0.00107  | 59 | 67  | 118 | 136 |
| PRSS30P       | -1.039 | 7.01E-05 | 0.00111  | 48 | 40  | 95  | 86  |
| F2R           | -1.202 | 7.02E-05 | 0.00111  | 27 | 32  | 68  | 68  |
| TRPM6         | -3.238 | 7.02E-05 | 0.00111  | 1  | 2   | 19  | 11  |
| HLA-DRB6      | -1.306 | 7.32E-05 | 0.00115  | 31 | 34  | 101 | 60  |
| DUSP7         | -1.242 | 7.35E-05 | 0.00115  | 84 | 107 | 300 | 152 |
| CLEC7A        | -1.131 | 8.15E-05 | 0.00126  | 37 | 30  | 76  | 71  |
| RP11-279F6.1  | -1.286 | 8.19E-05 | 0.00127  | 36 | 18  | 70  | 62  |
| PTPN22        | -1.056 | 8.29E-05 | 0.00128  | 45 | 54  | 99  | 107 |
| C1QL4         | -1.559 | 8.66E-05 | 0.00133  | 16 | 10  | 38  | 39  |
| RP4-813D12.2  | -1.385 | 8.80E-05 | 0.00135  | 18 | 24  | 63  | 47  |
| SDR16C5       | -1.448 | 9.10E-05 | 0.00138  | 30 | 30  | 110 | 54  |
| AUTS2         | -1.426 | 9.17E-05 | 0.00139  | 20 | 13  | 44  | 45  |

|               |        |          |         |    |     |     |     |
|---------------|--------|----------|---------|----|-----|-----|-----|
| RP11-3P17.4   | -1.137 | 9.20E-05 | 0.0014  | 42 | 27  | 83  | 69  |
| RP11-483C6.1  | -2.084 | 9.24E-05 | 0.0014  | 11 | 3   | 37  | 23  |
| AC068580.5    | -1.325 | 9.39E-05 | 0.00142 | 21 | 18  | 49  | 49  |
| ADAM19        | -1.228 | 0.000106 | 0.00158 | 47 | 31  | 115 | 68  |
| OSBPL6        | -1.06  | 0.000117 | 0.00171 | 48 | 32  | 89  | 78  |
| ZNF804A       | -2.397 | 0.000122 | 0.00178 | 6  | 2   | 17  | 26  |
| NTNG1         | -1.524 | 0.000128 | 0.00185 | 11 | 24  | 53  | 48  |
| C11orf70      | -2.585 | 0.000137 | 0.00196 | 2  | 4   | 23  | 14  |
| ADM2          | -1.226 | 0.000138 | 0.00198 | 27 | 34  | 85  | 58  |
| SLC7A8        | -1.033 | 0.000139 | 0.00199 | 40 | 41  | 85  | 81  |
| ARMCX4        | -1.454 | 0.000148 | 0.0021  | 16 | 16  | 38  | 50  |
| RIBC1         | -1.109 | 0.000152 | 0.00215 | 34 | 47  | 96  | 79  |
| RP11-324I22.2 | -6.426 | 0.000154 | 0.00216 | 0  | 0   | 9   | 8   |
| CCBL1         | -1.015 | 0.000157 | 0.00222 | 44 | 40  | 93  | 77  |
| GLIS3         | -1.089 | 0.00016  | 0.00224 | 38 | 47  | 103 | 78  |
| CCM2L         | -1.157 | 0.000165 | 0.00231 | 48 | 29  | 103 | 69  |
| RP11-116G8.4  | -1.102 | 0.000169 | 0.00235 | 37 | 43  | 101 | 71  |
| FAM171A1      | -1.076 | 0.000172 | 0.00239 | 45 | 46  | 116 | 76  |
| DNER          | -1.769 | 0.000173 | 0.0024  | 9  | 7   | 28  | 27  |
| PPP2R2B       | -2.464 | 0.000175 | 0.00242 | 2  | 4   | 18  | 16  |
| C1orf64       | -3.871 | 0.000185 | 0.00254 | 2  | 0   | 25  | 7   |
| TMC7          | -1.016 | 0.000187 | 0.00257 | 41 | 42  | 83  | 85  |
| KRT6C         | -2.798 | 0.000197 | 0.0027  | 3  | 1   | 14  | 15  |
| RP5-998N21.7  | -6.426 | 0.000208 | 0.00282 | 0  | 0   | 7   | 10  |
| BX571672.1    | -1.018 | 0.000216 | 0.00291 | 74 | 117 | 188 | 199 |
| HMX3          | -6.585 | 0.000218 | 0.00293 | 0  | 0   | 14  | 5   |
| RP1-34B20.4   | -1.007 | 0.000238 | 0.00317 | 40 | 45  | 84  | 87  |
| RP4-622L5.7   | -2.585 | 0.000248 | 0.00328 | 3  | 2   | 14  | 17  |
| ZPLD1         | -1.698 | 0.000251 | 0.00332 | 10 | 29  | 51  | 76  |
| CCDC28B       | -1.147 | 0.000255 | 0.00336 | 25 | 30  | 65  | 57  |
| RP11-49C9.2   | -6.34  | 0.000257 | 0.00338 | 0  | 0   | 8   | 8   |
| FST           | -6.34  | 0.000257 | 0.00339 | 0  | 0   | 8   | 8   |
| CCDC33        | -1.868 | 0.000266 | 0.00348 | 9  | 4   | 24  | 24  |
| RP3-426I6.2   | -6.34  | 0.000266 | 0.00348 | 0  | 0   | 9   | 7   |
| SLC16A10      | -1.704 | 0.000267 | 0.00349 | 9  | 28  | 74  | 47  |
| RP11-713M6.2  | -1.232 | 0.000269 | 0.00352 | 21 | 27  | 53  | 60  |
| CD101         | -1.309 | 0.000277 | 0.0036  | 18 | 19  | 45  | 47  |
| HOXB13        | -3.108 | 0.000277 | 0.00361 | 0  | 4   | 11  | 25  |
| RP1-127B20.4  | -2.397 | 0.000277 | 0.00361 | 4  | 4   | 30  | 13  |
| ANXA1         | -1.24  | 0.000279 | 0.00363 | 19 | 30  | 61  | 55  |
| RP11-734K21.5 | -2.033 | 0.000299 | 0.00384 | 13 | 2   | 38  | 24  |

|               |        |          |         |    |    |     |     |
|---------------|--------|----------|---------|----|----|-----|-----|
| RP11-267A15.1 | -2.893 | 0.000308 | 0.00393 | 2  | 2  | 21  | 10  |
| TMEM40        | -1.007 | 0.000312 | 0.00398 | 38 | 44 | 91  | 74  |
| RP11-309H21.3 | -2.257 | 0.000322 | 0.00409 | 3  | 5  | 24  | 15  |
| SHC3          | -2.369 | 0.000322 | 0.00409 | 5  | 2  | 23  | 14  |
| DIO3          | -1.137 | 0.000338 | 0.00428 | 29 | 25 | 66  | 53  |
| RSL24D1P3     | -1.649 | 0.000342 | 0.00431 | 12 | 7  | 35  | 25  |
| CASQ2         | -3.459 | 0.000371 | 0.00462 | 2  | 0  | 16  | 8   |
| AC073063.10   | -1.513 | 0.000372 | 0.00463 | 11 | 12 | 38  | 28  |
| TMEM139       | -1.173 | 0.000384 | 0.00476 | 32 | 22 | 73  | 49  |
| SCIN          | -1.702 | 0.000384 | 0.00476 | 8  | 10 | 24  | 35  |
| ABCB4         | -1.398 | 0.000396 | 0.00489 | 20 | 11 | 48  | 34  |
| PCDH8         | -1.155 | 0.000411 | 0.00505 | 32 | 55 | 112 | 82  |
| SOAT2         | -6.34  | 0.000412 | 0.00505 | 0  | 0  | 6   | 10  |
| CTD-2210P24.4 | -1.838 | 0.000425 | 0.0052  | 5  | 8  | 25  | 22  |
| RP11-45P15.4  | -1.825 | 0.000457 | 0.00553 | 7  | 16 | 55  | 27  |
| RP11-364B14.3 | -2.695 | 0.000461 | 0.00556 | 2  | 2  | 16  | 11  |
| XKR7          | -3.399 | 0.000461 | 0.00556 | 2  | 0  | 9   | 14  |
| TMEM171       | -1.373 | 0.000469 | 0.00565 | 14 | 16 | 42  | 36  |
| AC074289.1    | -1.845 | 0.000471 | 0.00565 | 4  | 12 | 29  | 29  |
| GSTA1         | -1.948 | 0.000478 | 0.00573 | 4  | 7  | 24  | 19  |
| SOX6          | -1.838 | 0.000486 | 0.00581 | 7  | 6  | 28  | 19  |
| AP001136.2    | -6.426 | 0.000492 | 0.00586 | 0  | 0  | 5   | 12  |
| GLP2R         | -2.377 | 0.000517 | 0.00611 | 5  | 1  | 18  | 14  |
| SORCS1        | -2.016 | 0.00054  | 0.00633 | 4  | 5  | 19  | 18  |
| CHGA          | -1.793 | 0.000546 | 0.00638 | 9  | 5  | 29  | 20  |
| KMO           | -1.068 | 0.00056  | 0.00653 | 38 | 32 | 89  | 58  |
| OR2B6         | -1.104 | 0.000562 | 0.00654 | 32 | 20 | 58  | 54  |
| PP13439       | -1.619 | 0.000578 | 0.00671 | 11 | 11 | 45  | 23  |
| FAM133A       | -1.412 | 0.000584 | 0.00677 | 20 | 43 | 67  | 101 |
| RP11-47P18.1  | -2.798 | 0.000584 | 0.00677 | 1  | 3  | 19  | 10  |
| HAR1A         | -1.857 | 0.000588 | 0.0068  | 7  | 5  | 19  | 25  |
| RP11-91H12.2  | -2.29  | 0.000599 | 0.00692 | 3  | 4  | 22  | 13  |
| SLITRK1       | -1.181 | 0.0006   | 0.00693 | 21 | 23 | 56  | 44  |
| ATP5G1P4      | -1.446 | 0.000609 | 0.00702 | 12 | 11 | 33  | 30  |
| RP11-642P15.1 | -1.354 | 0.000623 | 0.00715 | 23 | 16 | 65  | 35  |
| FRY           | -1.147 | 0.000627 | 0.00718 | 30 | 39 | 95  | 58  |
| F5            | -4.143 | 0.000665 | 0.00756 | 0  | 1  | 6   | 15  |
| RP11-707O23.5 | -1.672 | 0.000678 | 0.00768 | 15 | 4  | 32  | 29  |
| KLK7          | -2.919 | 0.00069  | 0.00779 | 2  | 1  | 15  | 9   |
| COL17A1       | -1.529 | 0.000695 | 0.00782 | 13 | 8  | 36  | 25  |
| PDE3B         | -1.6   | 0.000695 | 0.00783 | 8  | 11 | 35  | 23  |

|               |        |           |           |       |       |      |      |
|---------------|--------|-----------|-----------|-------|-------|------|------|
| ABCB1         | -2.919 | 0.000701  | 0.00788   | 0     | 3     | 12   | 12   |
| PKDCC         | -1.519 | 0.000708  | 0.00795   | 8     | 17    | 39   | 33   |
| ACOX2         | -1.335 | 0.000717  | 0.00802   | 18    | 12    | 35   | 41   |
| NXPH1         | -2.695 | 0.00072   | 0.00805   | 0     | 4     | 14   | 13   |
| CYS1          | -1.288 | 0.000722  | 0.00807   | 16    | 15    | 37   | 39   |
| BPIFB1        | -1.218 | 0.000723  | 0.00807   | 20    | 19    | 43   | 48   |
| EREG          | -1.275 | 0.00073   | 0.00813   | 18    | 17    | 37   | 48   |
| RP11-412D9.4  | -1.549 | 0.000746  | 0.00827   | 8     | 11    | 30   | 26   |
| MEF2C         | -3.399 | 0.000758  | 0.00837   | 0     | 2     | 16   | 7    |
| TRIM46        | -1.976 | 0.000779  | 0.00858   | 4     | 5     | 18   | 18   |
| USP26         | -6.15  | 0.000799  | 0.00876   | 0     | 0     | 8    | 6    |
| PTH           | -2.919 | 0.0008    | 0.00877   | 0     | 3     | 14   | 10   |
| AC068580.7    | -2.284 | 0.000809  | 0.00886   | 2     | 4     | 15   | 15   |
| AC114812.5    | -6.34  | 0.000811  | 0.00887   | 0     | 0     | 12   | 4    |
| IGSF9B        | -1.008 | 0.000855  | 0.00928   | 34    | 42    | 89   | 64   |
| PABPC1P7      | -6.15  | 0.000882  | 0.00951   | 0     | 0     | 6    | 8    |
| LAG3          | -3.335 | 0.00089   | 0.00959   | 0     | 2     | 8    | 14   |
| PPARGC1A      | -2.585 | 0.000896  | 0.00964   | 2     | 2     | 12   | 13   |
| ZNF716        | 4.925  | 1.13E-129 | 6.01E-126 | 2314  | 2371  | 97   | 57   |
| APOD          | 4.635  | 6.27E-116 | 1.85E-112 | 4366  | 4335  | 219  | 131  |
| RP11-402M4.1  | 12.105 | 1.10E-109 | 2.65E-106 | 441   | 440   | 0    | 0    |
| SLC17A9       | 3.893  | 5.97E-98  | 1.22E-94  | 2161  | 2493  | 163  | 150  |
| RP11-313J2.1  | 3.15   | 2.42E-90  | 4.02E-87  | 2648  | 2589  | 313  | 277  |
| ZNF844        | 4.061  | 1.90E-77  | 2.65E-74  | 906   | 1083  | 65   | 54   |
| CTD-3006G17.2 | 3.027  | 6.13E-77  | 8.13E-74  | 1479  | 1350  | 179  | 168  |
| ZNF788        | 4.857  | 6.71E-76  | 8.10E-73  | 391   | 368   | 16   | 10   |
| RP11-10A2.1   | 11.308 | 3.31E-72  | 3.82E-69  | 238   | 269   | 0    | 0    |
| ZNF69         | 3.192  | 1.69E-71  | 1.79E-68  | 1456  | 1506  | 187  | 137  |
| LINC00645     | 3.591  | 2.14E-69  | 2.19E-66  | 587   | 572   | 49   | 47   |
| RMST          | 2.716  | 1.23E-68  | 1.21E-65  | 2418  | 2460  | 396  | 346  |
| RP11-101E13.1 | 3.19   | 1.11E-66  | 1.05E-63  | 856   | 734   | 98   | 76   |
| SPAM1         | 4.686  | 5.55E-66  | 5.08E-63  | 341   | 359   | 17   | 10   |
| ZNF729        | 7.557  | 6.11E-65  | 5.41E-62  | 208   | 206   | 2    | 0    |
| NEB           | 2.603  | 2.40E-62  | 2.05E-59  | 1878  | 1812  | 332  | 275  |
| VCAN          | 4      | 3.36E-62  | 2.79E-59  | 474   | 425   | 38   | 18   |
| CTC-260E6.2   | 2.811  | 2.11E-60  | 1.65E-57  | 1200  | 1209  | 193  | 150  |
| POTEF         | 2.842  | 6.25E-60  | 4.74E-57  | 852   | 791   | 116  | 113  |
| INSL4         | 7.448  | 1.24E-57  | 8.87E-55  | 182   | 202   | 2    | 0    |
| IGFBP5        | 2.411  | 5.97E-56  | 4.17E-53  | 38584 | 37530 | 8015 | 6300 |
| ZNF98         | 2.378  | 6.04E-54  | 4.01E-51  | 1671  | 1532  | 334  | 282  |
| ZNF486        | 2.324  | 2.09E-53  | 1.32E-50  | 4458  | 4628  | 975  | 840  |



|               |       |          |          |       |       |       |       |
|---------------|-------|----------|----------|-------|-------|-------|-------|
| AC104135.3    | 2.351 | 2.11E-52 | 1.27E-49 | 15518 | 16041 | 3422  | 2762  |
| FAM123A       | 2.661 | 8.11E-49 | 4.22E-46 | 803   | 862   | 142   | 121   |
| RNF217        | 3.724 | 2.01E-48 | 9.91E-46 | 316   | 347   | 31    | 19    |
| CXCL14        | 2.921 | 6.96E-46 | 3.13E-43 | 1105  | 1130  | 187   | 108   |
| AKAP6         | 4.155 | 4.07E-45 | 1.69E-42 | 203   | 210   | 15    | 8     |
| RP11-384J4.2  | 4.185 | 1.08E-44 | 4.41E-42 | 241   | 290   | 12    | 17    |
| ZNF676        | 4.408 | 4.07E-44 | 1.59E-41 | 220   | 251   | 17    | 5     |
| RP11-867G2.6  | 4.184 | 4.33E-44 | 1.67E-41 | 190   | 177   | 9     | 11    |
| RP11-553A10.1 | 3.619 | 4.61E-44 | 1.75E-41 | 246   | 260   | 19    | 22    |
| BX571672.5    | 2.585 | 2.29E-43 | 8.45E-41 | 533   | 464   | 90    | 76    |
| RAB34         | 5.559 | 5.35E-43 | 1.95E-40 | 139   | 153   | 2     | 4     |
| RAG1          | 4.094 | 6.98E-43 | 2.50E-40 | 202   | 228   | 12    | 13    |
| PI15          | 2.879 | 1.01E-41 | 3.47E-39 | 365   | 372   | 50    | 50    |
| PABPC4L       | 2.076 | 1.16E-41 | 3.95E-39 | 2478  | 2487  | 667   | 510   |
| ZNF415        | 3.562 | 6.79E-41 | 2.23E-38 | 238   | 272   | 22    | 21    |
| hsa-mir-3171  | 3.487 | 7.17E-40 | 2.29E-37 | 229   | 188   | 18    | 19    |
| PSG9          | 3.363 | 1.01E-39 | 3.18E-37 | 349   | 414   | 47    | 27    |
| RP11-14K3.6   | 6.612 | 8.08E-39 | 2.44E-36 | 118   | 97    | 0     | 2     |
| FAM201B       | 2.354 | 9.88E-39 | 2.95E-36 | 582   | 513   | 119   | 95    |
| NT5E          | 2.098 | 8.13E-38 | 2.37E-35 | 1446  | 1475  | 388   | 294   |
| CTB-33O18.1   | 1.986 | 8.70E-38 | 2.51E-35 | 2413  | 2677  | 658   | 627   |
| RP11-423O2.2  | 2.04  | 1.82E-37 | 5.13E-35 | 2125  | 1662  | 440   | 481   |
| ZNF355P       | 3.468 | 1.47E-36 | 3.97E-34 | 231   | 280   | 21    | 25    |
| COL5A2        | 2.135 | 8.47E-36 | 2.21E-33 | 724   | 744   | 178   | 156   |
| RP11-95P9.1   | 3.297 | 5.34E-35 | 1.31E-32 | 193   | 192   | 24    | 15    |
| ATRNL1        | 1.838 | 3.51E-34 | 8.41E-32 | 3733  | 4020  | 1153  | 1016  |
| INHBA         | 1.929 | 8.21E-34 | 1.93E-31 | 3270  | 3348  | 1000  | 738   |
| TMEM229A      | 4.634 | 8.85E-34 | 2.06E-31 | 144   | 109   | 2     | 8     |
| COL12A1       | 1.761 | 1.98E-33 | 4.57E-31 | 8698  | 8440  | 2792  | 2265  |
| SHISA2        | 1.695 | 6.05E-33 | 1.37E-30 | 2806  | 2779  | 929   | 796   |
| GATM          | 2.815 | 9.65E-33 | 2.15E-30 | 247   | 268   | 36    | 37    |
| ZNF962P       | 3.288 | 1.17E-32 | 2.59E-30 | 178   | 195   | 17    | 21    |
| RNF32         | 1.808 | 1.23E-32 | 2.71E-30 | 1457  | 1450  | 451   | 379   |
| ANXA9         | 1.795 | 1.34E-32 | 2.92E-30 | 4124  | 4474  | 1315  | 1163  |
| ART4          | 2.045 | 1.38E-32 | 2.99E-30 | 977   | 1103  | 269   | 235   |
| ZNF441        | 2.048 | 2.88E-32 | 6.13E-30 | 948   | 1067  | 264   | 223   |
| SSFA2         | 1.756 | 4.24E-31 | 8.66E-29 | 39101 | 41426 | 13123 | 10721 |
| ABCA12        | 1.692 | 5.00E-31 | 1.01E-28 | 6975  | 6937  | 2367  | 1938  |
| PHLDA1        | 1.715 | 1.40E-30 | 2.81E-28 | 11662 | 11176 | 3918  | 3038  |
| PTGER4        | 2.022 | 1.06E-29 | 2.09E-27 | 1322  | 1424  | 401   | 275   |
| RP11-192P9.1  | 2.327 | 5.60E-29 | 1.07E-26 | 297   | 281   | 56    | 59    |

|               |       |          |          |       |       |      |      |
|---------------|-------|----------|----------|-------|-------|------|------|
| LRP2          | 2.043 | 6.44E-29 | 1.21E-26 | 440   | 434   | 111  | 101  |
| ITM2A         | 4.637 | 1.43E-28 | 2.65E-26 | 92    | 87    | 2    | 5    |
| SLC5A12       | 4.107 | 1.98E-28 | 3.62E-26 | 103   | 107   | 8    | 4    |
| TACC1         | 1.707 | 3.45E-28 | 6.23E-26 | 3959  | 4101  | 1403 | 1066 |
| ZNF679        | 3.715 | 3.53E-28 | 6.34E-26 | 125   | 127   | 15   | 4    |
| CABP4         | 4.602 | 4.17E-28 | 7.43E-26 | 91    | 108   | 4    | 4    |
| AC018865.8    | 2.033 | 4.29E-28 | 7.60E-26 | 565   | 520   | 121  | 144  |
| SLC4A10       | 1.636 | 6.17E-28 | 1.08E-25 | 2064  | 2190  | 739  | 630  |
| ZNF492        | 1.656 | 6.85E-28 | 1.20E-25 | 1336  | 1358  | 449  | 406  |
| KRT8P4        | 1.777 | 7.07E-28 | 1.23E-25 | 744   | 658   | 222  | 187  |
| MKX           | 2.288 | 2.00E-27 | 3.39E-25 | 301   | 325   | 65   | 63   |
| RP11-80F22.5  | 6.827 | 2.34E-27 | 3.94E-25 | 68    | 68    | 1    | 0    |
| AC093375.1    | 1.713 | 3.58E-27 | 5.99E-25 | 821   | 756   | 241  | 240  |
| AC108142.1    | 2.365 | 3.69E-27 | 6.13E-25 | 447   | 522   | 83   | 105  |
| C7orf13       | 1.576 | 4.44E-27 | 7.29E-25 | 3592  | 3662  | 1327 | 1106 |
| HAPLN1        | 6.024 | 9.31E-27 | 1.50E-24 | 69    | 74    | 0    | 2    |
| CADM1         | 1.608 | 1.20E-26 | 1.89E-24 | 4409  | 4670  | 1640 | 1338 |
| ZNF626        | 4.954 | 1.62E-26 | 2.53E-24 | 83    | 109   | 4    | 2    |
| CXorf61       | 1.98  | 2.09E-26 | 3.23E-24 | 537   | 560   | 160  | 118  |
| RP11-366L5.1  | 2.282 | 2.45E-26 | 3.75E-24 | 252   | 240   | 50   | 51   |
| ZNF208        | 9.484 | 6.47E-26 | 9.75E-24 | 60    | 83    | 0    | 0    |
| KIAA0087      | 4.745 | 1.43E-25 | 2.11E-23 | 77    | 89    | 4    | 2    |
| BCAS1         | 1.572 | 2.59E-25 | 3.76E-23 | 4737  | 5070  | 1818 | 1480 |
| EIF3FP1       | 2.329 | 3.88E-25 | 5.50E-23 | 360   | 339   | 89   | 50   |
| SERPINA1      | 1.588 | 6.76E-25 | 9.39E-23 | 3189  | 3426  | 1227 | 973  |
| RP11-46C20.1  | 1.974 | 7.96E-25 | 1.10E-22 | 414   | 396   | 120  | 86   |
| ZNF733P       | 5.453 | 1.09E-24 | 1.50E-22 | 81    | 59    | 2    | 1    |
| FHL1          | 1.455 | 3.58E-24 | 4.77E-22 | 2438  | 2363  | 970  | 781  |
| FAM84A        | 1.431 | 4.61E-24 | 6.12E-22 | 2606  | 2661  | 1040 | 913  |
| SGCG          | 1.559 | 6.99E-24 | 9.06E-22 | 1689  | 1761  | 659  | 512  |
| FOS           | 1.51  | 9.49E-24 | 1.22E-21 | 3476  | 3813  | 1354 | 1205 |
| POTEE         | 1.724 | 1.86E-23 | 2.36E-21 | 569   | 535   | 161  | 173  |
| LDHD          | 1.532 | 2.54E-23 | 3.18E-21 | 1323  | 1424  | 504  | 446  |
| RNA5SP18      | 2.139 | 2.95E-23 | 3.65E-21 | 271   | 298   | 63   | 66   |
| ZNF264        | 1.703 | 2.99E-23 | 3.69E-21 | 1019  | 1069  | 373  | 268  |
| RAB37         | 1.695 | 3.41E-23 | 4.15E-21 | 1129  | 1338  | 399  | 363  |
| CYP24A1       | 1.804 | 4.82E-23 | 5.85E-21 | 900   | 958   | 317  | 215  |
| STC1          | 1.47  | 4.90E-23 | 5.91E-21 | 22122 | 22435 | 8995 | 7091 |
| SPATA17       | 1.825 | 5.41E-23 | 6.49E-21 | 411   | 429   | 127  | 110  |
| DNALI1        | 2.468 | 6.34E-23 | 7.59E-21 | 236   | 307   | 52   | 46   |
| RP11-476K15.1 | 4.304 | 1.57E-22 | 1.83E-20 | 71    | 71    | 3    | 4    |

|               |       |          |          |      |      |      |      |
|---------------|-------|----------|----------|------|------|------|------|
| AC018890.6    | 1.981 | 3.66E-22 | 4.21E-20 | 290  | 283  | 68   | 77   |
| ZNF734P       | 4.636 | 3.99E-22 | 4.55E-20 | 94   | 60   | 4    | 2    |
| GDNF          | 2.806 | 4.14E-22 | 4.70E-20 | 135  | 167  | 22   | 21   |
| AC104135.2    | 1.976 | 4.92E-22 | 5.54E-20 | 306  | 277  | 68   | 80   |
| HPN           | 2.974 | 5.12E-22 | 5.73E-20 | 114  | 131  | 15   | 16   |
| ZNF257        | 1.357 | 6.51E-22 | 7.26E-20 | 2229 | 2242 | 929  | 816  |
| GEM           | 1.706 | 1.26E-21 | 1.38E-19 | 570  | 628  | 200  | 167  |
| MAST4         | 1.432 | 1.66E-21 | 1.81E-19 | 6050 | 6499 | 2558 | 2093 |
| DNAAF1        | 1.704 | 2.48E-21 | 2.69E-19 | 613  | 681  | 221  | 176  |
| WIPF1         | 1.405 | 4.15E-21 | 4.46E-19 | 1586 | 1623 | 666  | 546  |
| BNIP1         | 1.596 | 4.58E-21 | 4.89E-19 | 955  | 995  | 373  | 272  |
| ZNF442        | 1.53  | 1.21E-20 | 1.27E-18 | 1308 | 1523 | 530  | 450  |
| HMG11P16      | 1.565 | 1.26E-20 | 1.30E-18 | 563  | 523  | 181  | 186  |
| FOXP2         | 2.87  | 1.81E-20 | 1.87E-18 | 106  | 100  | 18   | 10   |
| BRWD3         | 1.47  | 2.11E-20 | 2.18E-18 | 1105 | 1144 | 456  | 356  |
| LINC00491     | 2.124 | 2.62E-20 | 2.67E-18 | 192  | 166  | 45   | 37   |
| TENM3         | 1.398 | 3.26E-20 | 3.32E-18 | 1043 | 1031 | 428  | 359  |
| VWDE          | 2.048 | 3.51E-20 | 3.55E-18 | 193  | 184  | 49   | 42   |
| RP11-282E4.1  | 2.965 | 6.20E-20 | 6.26E-18 | 138  | 207  | 21   | 23   |
| RP11-561N12.2 | 8.752 | 1.60E-19 | 1.59E-17 | 43   | 43   | 0    | 0    |
| KIAA1467      | 1.354 | 2.34E-19 | 2.30E-17 | 3168 | 3193 | 1410 | 1079 |
| SYCP2         | 1.282 | 2.90E-19 | 2.82E-17 | 2299 | 2334 | 1040 | 865  |
| SAMD13        | 1.755 | 4.56E-19 | 4.38E-17 | 291  | 253  | 80   | 81   |
| TDRD1         | 1.405 | 5.37E-19 | 5.13E-17 | 984  | 1000 | 418  | 331  |
| AP000462.2    | 1.887 | 8.04E-19 | 7.57E-17 | 341  | 303  | 74   | 100  |
| RP11-460N11.2 | 3.441 | 1.39E-18 | 1.30E-16 | 72   | 82   | 5    | 9    |
| PLA2G16       | 1.385 | 1.49E-18 | 1.38E-16 | 1614 | 1797 | 725  | 581  |
| ZNF334        | 3.087 | 2.09E-18 | 1.92E-16 | 79   | 84   | 9    | 10   |
| UNC13D        | 1.476 | 3.09E-18 | 2.82E-16 | 729  | 773  | 260  | 280  |
| RP11-8L2.1    | 1.832 | 3.09E-18 | 2.82E-16 | 215  | 202  | 61   | 56   |
| MUC16         | 1.642 | 3.10E-18 | 2.82E-16 | 583  | 416  | 173  | 147  |
| RP11-730G20.1 | 2.304 | 4.50E-18 | 4.07E-16 | 178  | 124  | 32   | 29   |
| FAM13C        | 2.712 | 4.66E-18 | 4.19E-16 | 91   | 87   | 14   | 13   |
| RNU5F-1       | 1.853 | 5.34E-18 | 4.78E-16 | 217  | 188  | 62   | 50   |
| AC005534.6    | 1.813 | 5.82E-18 | 5.18E-16 | 342  | 379  | 122  | 83   |
| TGFB1         | 1.248 | 7.76E-18 | 6.83E-16 | 2130 | 2258 | 992  | 856  |
| SV2B          | 2.374 | 9.10E-18 | 7.97E-16 | 124  | 105  | 26   | 18   |
| DCDC2         | 1.356 | 1.25E-17 | 1.08E-15 | 4365 | 4479 | 2012 | 1442 |
| RP11-80F22.6  | 5.435 | 1.66E-17 | 1.43E-15 | 43   | 52   | 2    | 0    |
| GJB7          | 1.597 | 2.50E-17 | 2.12E-15 | 391  | 417  | 151  | 116  |
| RP11-6N13.1   | 2.682 | 3.42E-17 | 2.88E-15 | 91   | 109  | 16   | 15   |

|               |       |          |          |       |       |       |       |
|---------------|-------|----------|----------|-------|-------|-------|-------|
| STC2          | 1.238 | 4.36E-17 | 3.66E-15 | 39442 | 40407 | 18886 | 14978 |
| LONRF2        | 1.184 | 5.27E-17 | 4.40E-15 | 11175 | 11223 | 5315  | 4542  |
| ABCG2         | 1.312 | 9.40E-17 | 7.71E-15 | 1449  | 1548  | 685   | 522   |
| CNGB3         | 1.355 | 1.30E-16 | 1.05E-14 | 596   | 576   | 252   | 206   |
| CASP10        | 1.565 | 1.33E-16 | 1.07E-14 | 325   | 341   | 120   | 105   |
| SPARCL1       | 2.23  | 1.43E-16 | 1.15E-14 | 116   | 110   | 23    | 25    |
| LIMCH1        | 1.57  | 1.46E-16 | 1.17E-14 | 383   | 431   | 139   | 135   |
| MAT1A         | 2.158 | 2.50E-16 | 1.96E-14 | 132   | 123   | 35    | 22    |
| RP11-321E8.1  | 3.251 | 5.00E-16 | 3.87E-14 | 62    | 73    | 6     | 8     |
| ZNF439        | 2.867 | 5.02E-16 | 3.87E-14 | 126   | 167   | 30    | 10    |
| COL21A1       | 1.28  | 8.33E-16 | 6.32E-14 | 1020  | 1010  | 478   | 358   |
| XCL1          | 2.733 | 1.07E-15 | 7.97E-14 | 84    | 70    | 10    | 13    |
| ZNF479        | 4.849 | 1.09E-15 | 8.10E-14 | 56    | 36    | 2     | 1     |
| POTEI         | 1.225 | 1.38E-15 | 1.02E-13 | 1391  | 1507  | 680   | 560   |
| MAP2          | 1.245 | 1.49E-15 | 1.09E-13 | 765   | 672   | 333   | 273   |
| ZNF91         | 1.171 | 1.55E-15 | 1.13E-13 | 21403 | 22675 | 10744 | 8829  |
| KRT24         | 2.432 | 1.82E-15 | 1.32E-13 | 92    | 87    | 15    | 18    |
| RP11-395N3.1  | 1.106 | 1.92E-15 | 1.39E-13 | 15985 | 15278 | 7899  | 6628  |
| FAM63A        | 1.313 | 2.47E-15 | 1.77E-13 | 3377  | 3877  | 1681  | 1238  |
| ADIPOR2       | 1.145 | 2.53E-15 | 1.81E-13 | 11648 | 12308 | 5833  | 5003  |
| RP11-68L18.1  | 1.365 | 3.30E-15 | 2.36E-13 | 1143  | 1199  | 541   | 368   |
| RP11-662G23.1 | 1.261 | 3.46E-15 | 2.45E-13 | 1752  | 2085  | 854   | 747   |
| PAPLN         | 1.575 | 4.03E-15 | 2.84E-13 | 242   | 247   | 87    | 77    |
| ZNF506        | 1.161 | 5.00E-15 | 3.48E-13 | 3460  | 3618  | 1766  | 1399  |
| ZDHC15        | 5.076 | 1.11E-14 | 7.65E-13 | 38    | 36    | 0     | 2     |
| PTGER3        | 1.468 | 1.18E-14 | 8.09E-13 | 364   | 397   | 133   | 142   |
| AC002075.3    | 1.087 | 1.39E-14 | 9.44E-13 | 2011  | 2047  | 1030  | 880   |
| WNT2B         | 1.58  | 1.43E-14 | 9.65E-13 | 240   | 197   | 79    | 67    |
| PCDHB5        | 1.522 | 1.62E-14 | 1.09E-12 | 304   | 288   | 94    | 112   |
| TP53TG3B      | 2.151 | 2.03E-14 | 1.36E-12 | 100   | 105   | 26    | 20    |
| MPV17L        | 1.233 | 2.09E-14 | 1.40E-12 | 1226  | 1372  | 619   | 486   |
| SPINK5        | 1.493 | 2.16E-14 | 1.44E-12 | 286   | 311   | 109   | 103   |
| RP11-6N13.4   | 1.041 | 3.21E-14 | 2.12E-12 | 2362  | 2224  | 1115  | 1113  |
| GAPDHP21      | 2.306 | 3.46E-14 | 2.29E-12 | 84    | 80    | 17    | 16    |
| CTD-2015H3.1  | 4.291 | 4.21E-14 | 2.74E-12 | 45    | 37    | 4     | 0     |
| CD74          | 1.861 | 4.56E-14 | 2.95E-12 | 154   | 119   | 40    | 35    |
| MIR1305       | 2.002 | 4.95E-14 | 3.18E-12 | 125   | 148   | 32    | 36    |
| NEK9          | 1.271 | 5.15E-14 | 3.30E-12 | 946   | 1050  | 473   | 354   |
| ZNF347        | 1.229 | 5.17E-14 | 3.31E-12 | 538   | 482   | 237   | 198   |
| LMCD1         | 1.19  | 5.80E-14 | 3.68E-12 | 1015  | 1094  | 516   | 408   |
| CYP4F30P      | 2.188 | 6.54E-14 | 4.13E-12 | 91    | 92    | 19    | 21    |

|              |       |          |          |       |       |       |       |
|--------------|-------|----------|----------|-------|-------|-------|-------|
| BAG3         | 1.1   | 7.31E-14 | 4.59E-12 | 6739  | 7228  | 3564  | 2950  |
| GALM         | 1.291 | 9.75E-14 | 6.09E-12 | 804   | 907   | 399   | 300   |
| CLMP         | 1.411 | 1.00E-13 | 6.23E-12 | 327   | 354   | 140   | 116   |
| NECAB1       | 1.091 | 1.13E-13 | 6.97E-12 | 12337 | 12897 | 6573  | 5276  |
| PROS1        | 1.244 | 1.31E-13 | 8.06E-12 | 477   | 409   | 202   | 172   |
| CXCR7        | 1.13  | 1.34E-13 | 8.21E-12 | 6441  | 6820  | 3443  | 2615  |
| MIR4652      | 1.142 | 1.36E-13 | 8.33E-12 | 770   | 693   | 365   | 298   |
| MATN3        | 1.294 | 1.65E-13 | 1.01E-11 | 395   | 400   | 177   | 147   |
| MC4R         | 2.344 | 2.19E-13 | 1.32E-11 | 90    | 124   | 21    | 21    |
| RP11-248C1.2 | 1.705 | 2.31E-13 | 1.39E-11 | 226   | 270   | 91    | 61    |
| UCN3         | 2.705 | 3.00E-13 | 1.80E-11 | 70    | 55    | 11    | 8     |
| SLC7A2       | 1.063 | 3.22E-13 | 1.93E-11 | 72915 | 74398 | 39393 | 31132 |
| DLC1         | 1.114 | 3.41E-13 | 2.03E-11 | 2132  | 2207  | 1154  | 851   |
| ZNF853       | 1.472 | 3.53E-13 | 2.10E-11 | 249   | 259   | 104   | 79    |
| ZNF737       | 1.071 | 3.71E-13 | 2.20E-11 | 3180  | 3270  | 1721  | 1350  |
| FAM46A       | 1.068 | 4.16E-13 | 2.46E-11 | 8709  | 9025  | 4730  | 3727  |
| FRK          | 1.137 | 7.21E-13 | 4.18E-11 | 1344  | 1354  | 712   | 515   |
| CYP4F43P     | 1.53  | 7.33E-13 | 4.23E-11 | 194   | 179   | 74    | 55    |
| MCEE         | 1.069 | 8.23E-13 | 4.74E-11 | 803   | 722   | 376   | 351   |
| C12orf69     | 1.424 | 8.92E-13 | 5.12E-11 | 225   | 202   | 85    | 74    |
| FGF18        | 1.537 | 9.86E-13 | 5.62E-11 | 269   | 332   | 114   | 93    |
| FCGRT        | 1.777 | 1.04E-12 | 5.89E-11 | 140   | 145   | 51    | 32    |
| COL9A3       | 1.092 | 1.29E-12 | 7.24E-11 | 852   | 894   | 434   | 385   |
| LINC00534    | 1.064 | 1.31E-12 | 7.36E-11 | 923   | 902   | 435   | 438   |
| LMBR1        | 1.007 | 1.62E-12 | 8.99E-11 | 22528 | 22653 | 12408 | 10080 |
| CLEC3A       | 1.053 | 1.94E-12 | 1.06E-10 | 1771  | 1919  | 981   | 797   |
| MXRA7        | 1.114 | 2.78E-12 | 1.52E-10 | 1064  | 1220  | 549   | 506   |
| SPATA9       | 1.351 | 3.05E-12 | 1.66E-10 | 250   | 230   | 93    | 95    |
| ATP8A2       | 1.557 | 3.24E-12 | 1.76E-10 | 310   | 379   | 141   | 93    |
| SNCAIP       | 2.585 | 4.39E-12 | 2.37E-10 | 83    | 146   | 19    | 19    |
| GPR158       | 1.429 | 4.77E-12 | 2.57E-10 | 360   | 386   | 169   | 108   |
| NR3C1        | 1.068 | 4.88E-12 | 2.62E-10 | 4382  | 4707  | 2477  | 1858  |
| TRIM54       | 2.515 | 5.03E-12 | 2.69E-10 | 60    | 61    | 12    | 9     |
| AC139666.1   | 1.378 | 5.08E-12 | 2.71E-10 | 239   | 237   | 104   | 79    |
| RCN1         | 1.079 | 7.95E-12 | 4.18E-10 | 768   | 793   | 408   | 331   |
| BCAM         | 1.055 | 8.83E-12 | 4.60E-10 | 1261  | 1414  | 693   | 594   |
| MYT1         | 1.807 | 9.18E-12 | 4.77E-10 | 120   | 150   | 40    | 37    |
| GNA15        | 1.663 | 1.51E-11 | 7.73E-10 | 211   | 277   | 70    | 84    |
| GS1-179L18.1 | 3.29  | 1.54E-11 | 7.86E-10 | 41    | 39    | 3     | 5     |
| AP000462.1   | 1.678 | 1.59E-11 | 8.06E-10 | 160   | 122   | 39    | 49    |
| C21orf88     | 1.615 | 1.64E-11 | 8.30E-10 | 182   | 192   | 77    | 45    |

|               |       |          |          |      |      |     |     |
|---------------|-------|----------|----------|------|------|-----|-----|
| NAV2          | 1.165 | 1.66E-11 | 8.43E-10 | 705  | 659  | 361 | 247 |
| CLDN9         | 1.115 | 1.67E-11 | 8.44E-10 | 828  | 842  | 447 | 324 |
| AC005534.8    | 1.826 | 1.74E-11 | 8.80E-10 | 96   | 96   | 30  | 24  |
| CSGALNACT1    | 1.253 | 1.87E-11 | 9.37E-10 | 294  | 257  | 113 | 118 |
| GIMAP2        | 2.02  | 2.47E-11 | 1.22E-09 | 82   | 89   | 26  | 16  |
| HTR2C         | 1.679 | 3.23E-11 | 1.57E-09 | 112  | 119  | 36  | 36  |
| HEBP1         | 1.044 | 3.24E-11 | 1.57E-09 | 865  | 810  | 464 | 348 |
| RP11-742B18.1 | 1.684 | 3.33E-11 | 1.61E-09 | 132  | 148  | 53  | 34  |
| RP11-293M10.6 | 1.384 | 3.35E-11 | 1.62E-09 | 179  | 171  | 70  | 64  |
| CTD-3199J23.4 | 1.674 | 3.79E-11 | 1.81E-09 | 152  | 193  | 63  | 45  |
| RTKN          | 1.056 | 4.12E-11 | 1.96E-09 | 708  | 748  | 385 | 315 |
| ZNF702P       | 1.996 | 5.41E-11 | 2.54E-09 | 87   | 105  | 30  | 18  |
| KIF5C         | 1.033 | 6.38E-11 | 2.99E-09 | 1344 | 1457 | 780 | 589 |
| PSG4          | 2.768 | 6.45E-11 | 3.02E-09 | 48   | 69   | 8   | 9   |
| B3GALT5       | 1.084 | 7.97E-11 | 3.67E-09 | 409  | 384  | 197 | 177 |
| ZNF563        | 1.103 | 8.98E-11 | 4.08E-09 | 540  | 601  | 271 | 260 |
| DSCAM         | 1.361 | 1.07E-10 | 4.84E-09 | 179  | 181  | 69  | 71  |
| HTR7P1        | 1.08  | 1.82E-10 | 8.10E-09 | 831  | 951  | 476 | 367 |
| MIR548Y       | 1.726 | 1.87E-10 | 8.31E-09 | 94   | 105  | 32  | 28  |
| BX571672.8    | 1.678 | 2.75E-10 | 1.20E-08 | 306  | 168  | 76  | 72  |
| AC004947.2    | 3.178 | 4.21E-10 | 1.81E-08 | 36   | 38   | 2   | 6   |
| DSPP          | 2.448 | 4.55E-10 | 1.95E-08 | 66   | 44   | 10  | 10  |
| DUSP5P1       | 2.385 | 4.90E-10 | 2.09E-08 | 52   | 69   | 13  | 10  |
| SMPDL3A       | 1.052 | 5.25E-10 | 2.23E-08 | 511  | 561  | 278 | 239 |
| RGL3          | 1.128 | 6.07E-10 | 2.56E-08 | 515  | 604  | 249 | 263 |
| GJB3          | 1.073 | 7.17E-10 | 3.02E-08 | 725  | 851  | 421 | 328 |
| BTN3A1        | 1.849 | 7.30E-10 | 3.06E-08 | 84   | 111  | 29  | 25  |
| ZNF99         | 2.254 | 7.41E-10 | 3.10E-08 | 71   | 49   | 16  | 9   |
| ZSCAN30       | 1.099 | 7.56E-10 | 3.16E-08 | 309  | 274  | 146 | 126 |
| C20orf144     | 1.037 | 8.21E-10 | 3.42E-08 | 587  | 661  | 331 | 277 |
| RNU5A-8P      | 1.132 | 9.09E-10 | 3.76E-08 | 276  | 248  | 132 | 107 |
| RP11-61G23.1  | 3.118 | 9.13E-10 | 3.77E-08 | 38   | 33   | 2   | 6   |
| SEC14L4       | 1.923 | 9.92E-10 | 4.07E-08 | 77   | 79   | 16  | 25  |
| CTD-2134A5.3  | 2.714 | 1.00E-09 | 4.10E-08 | 51   | 42   | 12  | 2   |
| LAMB1         | 1.495 | 1.17E-09 | 4.76E-08 | 112  | 111  | 41  | 38  |
| RNU5A-1       | 1.059 | 1.47E-09 | 5.87E-08 | 461  | 431  | 249 | 179 |
| RFTN2         | 1.233 | 1.58E-09 | 6.32E-08 | 192  | 168  | 83  | 70  |
| POTEJ         | 1.066 | 2.50E-09 | 9.75E-08 | 299  | 298  | 146 | 139 |
| RP11-798K3.2  | 4.867 | 2.55E-09 | 9.93E-08 | 46   | 18   | 2   | 0   |
| INHBA-AS1     | 2.092 | 2.87E-09 | 1.11E-07 | 55   | 65   | 15  | 13  |
| HRH1          | 2.555 | 3.28E-09 | 1.25E-07 | 53   | 42   | 4   | 12  |

|               |       |          |          |     |     |     |     |
|---------------|-------|----------|----------|-----|-----|-----|-----|
| CST9          | 3.533 | 3.39E-09 | 1.29E-07 | 32  | 28  | 5   | 0   |
| TP53TG3       | 1.98  | 4.26E-09 | 1.59E-07 | 58  | 57  | 17  | 12  |
| DMP1          | 1.65  | 5.53E-09 | 2.04E-07 | 102 | 140 | 41  | 36  |
| TRIM9         | 1.749 | 5.66E-09 | 2.09E-07 | 76  | 69  | 26  | 17  |
| WNT5B         | 2.055 | 6.09E-09 | 2.23E-07 | 67  | 50  | 12  | 16  |
| C14ORF57      | 1.573 | 6.31E-09 | 2.31E-07 | 151 | 132 | 64  | 31  |
| PCDH15        | 3.768 | 7.19E-09 | 2.61E-07 | 25  | 32  | 0   | 4   |
| ALDH1A2       | 2.36  | 7.58E-09 | 2.75E-07 | 47  | 77  | 14  | 10  |
| ENG           | 1.425 | 8.43E-09 | 3.04E-07 | 126 | 151 | 59  | 44  |
| RNY3P4        | 1.696 | 9.54E-09 | 3.40E-07 | 78  | 65  | 24  | 20  |
| PHACTR3       | 1.364 | 9.89E-09 | 3.52E-07 | 144 | 124 | 63  | 41  |
| ANKRD6        | 1.028 | 1.00E-08 | 3.55E-07 | 414 | 469 | 237 | 196 |
| RP11-124L5.7  | 1.018 | 1.06E-08 | 3.76E-07 | 376 | 410 | 194 | 194 |
| OVGP1         | 1.38  | 1.12E-08 | 3.94E-07 | 114 | 105 | 45  | 39  |
| DRAXIN        | 2.643 | 1.17E-08 | 4.11E-07 | 40  | 36  | 10  | 2   |
| NEUROD1       | 1.377 | 1.47E-08 | 5.08E-07 | 113 | 121 | 51  | 39  |
| BTN3A2        | 1.506 | 1.53E-08 | 5.25E-07 | 93  | 92  | 38  | 27  |
| CYP4F31P      | 2.858 | 1.68E-08 | 5.75E-07 | 42  | 68  | 3   | 12  |
| RP11-21K20.1  | 1.278 | 1.83E-08 | 6.22E-07 | 132 | 123 | 59  | 46  |
| RP11-451B8.1  | 5.358 | 1.94E-08 | 6.58E-07 | 16  | 33  | 0   | 1   |
| LSM3P4        | 1.325 | 2.35E-08 | 7.89E-07 | 170 | 191 | 62  | 82  |
| RP11-42I10.1  | 2.475 | 2.46E-08 | 8.25E-07 | 64  | 37  | 6   | 12  |
| RNU5B-1       | 1.008 | 2.50E-08 | 8.38E-07 | 533 | 638 | 325 | 257 |
| RP11-430C1.1  | 3.18  | 3.10E-08 | 1.02E-06 | 26  | 30  | 4   | 2   |
| SLCO6A1       | 7.788 | 3.66E-08 | 1.20E-06 | 33  | 11  | 0   | 0   |
| CTD-2280E9.1  | 1.633 | 3.79E-08 | 1.24E-06 | 78  | 62  | 24  | 21  |
| CPQ           | 1.094 | 3.84E-08 | 1.25E-06 | 224 | 199 | 114 | 84  |
| AC005682.5    | 1.275 | 3.88E-08 | 1.27E-06 | 187 | 244 | 87  | 91  |
| CCDC148       | 1.463 | 4.32E-08 | 1.39E-06 | 93  | 92  | 40  | 27  |
| RNA5SP93      | 1.571 | 5.00E-08 | 1.59E-06 | 83  | 66  | 27  | 23  |
| C12orf60      | 1.017 | 5.36E-08 | 1.69E-06 | 276 | 299 | 144 | 140 |
| VWA5A         | 1.638 | 5.65E-08 | 1.78E-06 | 101 | 80  | 39  | 19  |
| CTD-2154I11.2 | 1.488 | 5.83E-08 | 1.83E-06 | 83  | 80  | 33  | 25  |
| FRAS1         | 1.288 | 6.36E-08 | 1.99E-06 | 141 | 145 | 51  | 66  |
| TRDN          | 3.608 | 7.43E-08 | 2.29E-06 | 22  | 29  | 4   | 0   |
| BCL2L10       | 2.734 | 8.37E-08 | 2.56E-06 | 29  | 32  | 5   | 4   |
| SCNN1G        | 1.781 | 1.04E-07 | 3.14E-06 | 54  | 53  | 17  | 14  |
| ZNF72P        | 2.99  | 1.05E-07 | 3.17E-06 | 34  | 23  | 3   | 4   |
| GPR63         | 2.073 | 1.11E-07 | 3.32E-06 | 43  | 46  | 14  | 7   |
| FAM135A       | 1.864 | 1.19E-07 | 3.54E-06 | 52  | 65  | 15  | 17  |
| STK31         | 1.086 | 1.19E-07 | 3.54E-06 | 170 | 155 | 79  | 74  |

|                |       |          |          |     |     |     |     |
|----------------|-------|----------|----------|-----|-----|-----|-----|
| HAP1           | 1.133 | 1.41E-07 | 4.14E-06 | 152 | 164 | 74  | 70  |
| ARL11          | 1.062 | 1.49E-07 | 4.35E-06 | 262 | 308 | 154 | 119 |
| CTB-33O18.3    | 1.327 | 1.70E-07 | 4.92E-06 | 110 | 106 | 53  | 33  |
| AC008069.2     | 2.44  | 1.97E-07 | 5.64E-06 | 32  | 34  | 6   | 6   |
| DIRC3          | 1.297 | 2.24E-07 | 6.34E-06 | 101 | 113 | 47  | 40  |
| SLC25A5P5      | 1.919 | 2.28E-07 | 6.44E-06 | 69  | 45  | 20  | 10  |
| PVRL3-AS1      | 1.436 | 2.43E-07 | 6.83E-06 | 90  | 97  | 43  | 26  |
| ZNF883         | 1.537 | 2.45E-07 | 6.88E-06 | 86  | 74  | 36  | 19  |
| TCEA3          | 1.154 | 2.64E-07 | 7.40E-06 | 130 | 135 | 65  | 54  |
| NLRC5          | 2.121 | 2.73E-07 | 7.63E-06 | 39  | 53  | 11  | 10  |
| TM4SF20        | 1.011 | 2.82E-07 | 7.89E-06 | 191 | 192 | 103 | 87  |
| CACNA2D4       | 1.451 | 3.02E-07 | 8.37E-06 | 78  | 70  | 31  | 23  |
| CYP1A1         | 1.031 | 3.47E-07 | 9.46E-06 | 198 | 217 | 101 | 102 |
| TMPRSS6        | 1.785 | 3.90E-07 | 1.05E-05 | 49  | 48  | 17  | 11  |
| SLC30A8        | 3.788 | 4.27E-07 | 1.14E-05 | 28  | 16  | 3   | 0   |
| RP11-384L8.1   | 1.815 | 4.32E-07 | 1.15E-05 | 54  | 45  | 12  | 16  |
| RP11-216M21.7  | 1.295 | 4.35E-07 | 1.16E-05 | 94  | 83  | 39  | 33  |
| RP11-439E19.10 | 1.443 | 5.12E-07 | 1.35E-05 | 167 | 146 | 40  | 75  |
| RP11-1281K21.7 | 1.861 | 5.41E-07 | 1.42E-05 | 49  | 46  | 18  | 8   |
| C1orf168       | 1.708 | 5.53E-07 | 1.45E-05 | 58  | 47  | 16  | 16  |
| AB015752.4     | 1.035 | 5.54E-07 | 1.45E-05 | 162 | 166 | 82  | 78  |
| GRPR           | 1.957 | 5.62E-07 | 1.47E-05 | 49  | 37  | 10  | 12  |
| RBM11          | 1.099 | 6.03E-07 | 1.56E-05 | 152 | 131 | 63  | 69  |
| FAM78B         | 2.725 | 6.64E-07 | 1.70E-05 | 29  | 25  | 6   | 2   |
| TSPAN10        | 1.604 | 9.02E-07 | 2.26E-05 | 57  | 62  | 18  | 21  |
| RP11-341G5.3   | 7.087 | 9.20E-07 | 2.29E-05 | 16  | 11  | 0   | 0   |
| AC018865.9     | 1.528 | 9.60E-07 | 2.38E-05 | 62  | 71  | 28  | 18  |
| RHBDL2         | 1.469 | 1.09E-06 | 2.68E-05 | 134 | 168 | 75  | 34  |
| RP11-443N24.3  | 3.522 | 1.19E-06 | 2.89E-05 | 55  | 16  | 4   | 2   |
| RP11-30J20.1   | 7.14  | 1.21E-06 | 2.93E-05 | 11  | 17  | 0   | 0   |
| HDX            | 1.581 | 1.21E-06 | 2.93E-05 | 61  | 86  | 23  | 26  |
| CTD-2147F2.1   | 1.049 | 1.24E-06 | 2.99E-05 | 165 | 191 | 96  | 76  |
| SRPX           | 1.918 | 1.33E-06 | 3.19E-05 | 41  | 54  | 10  | 15  |
| AC144521.1     | 2.532 | 1.33E-06 | 3.19E-05 | 26  | 27  | 5   | 4   |
| AC005537.2     | 2.636 | 1.34E-06 | 3.20E-05 | 33  | 24  | 2   | 7   |
| ZNF491         | 1.302 | 1.55E-06 | 3.65E-05 | 93  | 75  | 31  | 37  |
| PLS3           | 1.346 | 1.74E-06 | 4.09E-05 | 93  | 70  | 38  | 26  |
| CYP4B1         | 1.058 | 1.75E-06 | 4.09E-05 | 125 | 123 | 63  | 56  |
| COLEC12        | 1.569 | 1.85E-06 | 4.31E-05 | 59  | 69  | 28  | 15  |
| RP11-37L2.1    | 1.519 | 1.90E-06 | 4.42E-05 | 60  | 55  | 19  | 21  |
| SKAP1          | 1.628 | 2.21E-06 | 5.09E-05 | 53  | 68  | 17  | 22  |



|                |       |          |          |     |     |     |    |
|----------------|-------|----------|----------|-----|-----|-----|----|
| ADA            | 1.096 | 2.33E-06 | 5.35E-05 | 154 | 152 | 89  | 54 |
| DLX3           | 1.017 | 2.45E-06 | 5.59E-05 | 216 | 191 | 124 | 77 |
| ADAMTS20       | 1.371 | 2.76E-06 | 6.23E-05 | 91  | 137 | 46  | 42 |
| ALS2CR11       | 1.757 | 3.21E-06 | 7.17E-05 | 45  | 40  | 11  | 14 |
| SLC22A18AS     | 1.362 | 3.27E-06 | 7.26E-05 | 76  | 58  | 26  | 26 |
| C12orf56       | 2.031 | 3.44E-06 | 7.62E-05 | 33  | 33  | 8   | 8  |
| ADPRH          | 1.014 | 3.49E-06 | 7.71E-05 | 148 | 137 | 83  | 58 |
| TAC4           | 6.977 | 4.02E-06 | 8.79E-05 | 16  | 9   | 0   | 0  |
| VCX            | 1.934 | 4.07E-06 | 8.90E-05 | 42  | 35  | 15  | 5  |
| GDNF-AS1       | 3.222 | 4.23E-06 | 9.19E-05 | 20  | 19  | 4   | 0  |
| WTAPP1         | 2.131 | 4.32E-06 | 9.35E-05 | 29  | 33  | 7   | 7  |
| RP13-15E13.1   | 1.764 | 4.41E-06 | 9.51E-05 | 40  | 42  | 13  | 11 |
| EDIL3          | 2.585 | 5.10E-06 | 0.000109 | 26  | 23  | 2   | 6  |
| HSPD1P10       | 1.348 | 5.26E-06 | 0.000112 | 69  | 56  | 26  | 23 |
| LINC00578      | 2.951 | 5.32E-06 | 0.000113 | 18  | 22  | 3   | 2  |
| SLC44A5        | 1.877 | 7.61E-06 | 0.000157 | 34  | 40  | 12  | 8  |
| RP11-408B11.2  | 1.214 | 7.84E-06 | 0.000161 | 83  | 68  | 35  | 30 |
| KCNV2          | 1.402 | 9.50E-06 | 0.000191 | 62  | 52  | 20  | 23 |
| RP11-174O3.3   | 1.347 | 1.01E-05 | 0.000202 | 77  | 53  | 25  | 26 |
| RP11-562F9.1   | 3.021 | 1.03E-05 | 0.000205 | 18  | 24  | 5   | 0  |
| RP13-192B19.2  | 1.578 | 1.04E-05 | 0.000207 | 45  | 39  | 16  | 12 |
| XXbac-B135H6.1 | 1.036 | 1.06E-05 | 0.000211 | 135 | 138 | 58  | 75 |
| RP11-439E19.8  | 2.355 | 1.08E-05 | 0.000214 | 28  | 70  | 11  | 8  |
| RP11-638F5.1   | 2.877 | 1.13E-05 | 0.000223 | 19  | 19  | 3   | 2  |
| RP11-1281K21.6 | 1.944 | 1.16E-05 | 0.000229 | 70  | 46  | 7   | 23 |
| AC121251.1     | 1.753 | 1.17E-05 | 0.00023  | 36  | 42  | 13  | 10 |
| CYB5R2         | 1.215 | 1.20E-05 | 0.000235 | 76  | 96  | 39  | 35 |
| GSTM2          | 1.319 | 1.24E-05 | 0.000241 | 70  | 90  | 39  | 25 |
| INPP1          | 1.03  | 1.26E-05 | 0.000245 | 168 | 212 | 111 | 75 |
| RP11-63P12.6   | 1.652 | 1.31E-05 | 0.000254 | 40  | 39  | 16  | 9  |
| HTR7           | 1.629 | 1.32E-05 | 0.000255 | 50  | 37  | 14  | 14 |
| TMEM106A       | 1.071 | 1.37E-05 | 0.000263 | 96  | 108 | 52  | 45 |
| AC010886.2     | 2.353 | 1.57E-05 | 0.000297 | 22  | 35  | 7   | 4  |
| RP1-234P15.4   | 1.217 | 1.61E-05 | 0.000303 | 121 | 121 | 71  | 33 |
| RP11-510J16.3  | 1.163 | 1.63E-05 | 0.000306 | 89  | 68  | 36  | 34 |
| RP11-439E19.6  | 1.156 | 1.81E-05 | 0.000338 | 103 | 71  | 41  | 37 |
| RP11-443N24.2  | 2.389 | 1.95E-05 | 0.00036  | 24  | 24  | 7   | 2  |
| RP11-161I6.2   | 4.392 | 1.96E-05 | 0.000362 | 14  | 11  | 1   | 0  |
| C20orf195      | 2.801 | 2.06E-05 | 0.000378 | 24  | 19  | 0   | 6  |
| BATF2          | 1.614 | 2.11E-05 | 0.000387 | 45  | 35  | 13  | 13 |
| AP001053.11    | 1.06  | 2.45E-05 | 0.000438 | 140 | 173 | 93  | 57 |

|               |       |          |          |     |     |     |    |
|---------------|-------|----------|----------|-----|-----|-----|----|
| RP11-182N22.7 | 1.636 | 2.46E-05 | 0.00044  | 39  | 36  | 12  | 12 |
| SECTM1        | 1.134 | 2.57E-05 | 0.000458 | 190 | 146 | 103 | 50 |
| AC012501.2    | 1.109 | 2.62E-05 | 0.000464 | 143 | 101 | 71  | 42 |
| COL4A4        | 1.518 | 2.69E-05 | 0.000477 | 45  | 47  | 13  | 19 |
| PDCL3P3       | 2.661 | 2.94E-05 | 0.000514 | 18  | 21  | 4   | 2  |
| PDZD7         | 1.216 | 3.10E-05 | 0.00054  | 104 | 161 | 68  | 46 |
| DCAF12L2      | 1.55  | 3.24E-05 | 0.000559 | 51  | 46  | 11  | 22 |
| SDR9C7        | 2.248 | 3.25E-05 | 0.000561 | 26  | 27  | 2   | 9  |
| ACTL8         | 1.057 | 3.50E-05 | 0.000599 | 103 | 97  | 60  | 36 |
| PKHD1         | 4.448 | 3.51E-05 | 0.000602 | 9   | 17  | 1   | 0  |
| AL450307.1    | 3.68  | 3.66E-05 | 0.000624 | 17  | 11  | 2   | 0  |
| RP11-80F22.9  | 6.728 | 3.67E-05 | 0.000625 | 8   | 13  | 0   | 0  |
| RP11-439E19.3 | 1.381 | 3.78E-05 | 0.000641 | 58  | 83  | 34  | 20 |
| AC002076.9    | 1.292 | 4.03E-05 | 0.000681 | 73  | 62  | 37  | 18 |
| ANKRD36BP2    | 1.119 | 4.05E-05 | 0.000683 | 93  | 68  | 42  | 32 |
| NBEAP3        | 1.346 | 4.57E-05 | 0.000761 | 55  | 47  | 18  | 22 |
| POU6F2-AS2    | 6.794 | 4.91E-05 | 0.00081  | 7   | 15  | 0   | 0  |
| ZNF849P       | 1.269 | 4.95E-05 | 0.000816 | 68  | 60  | 35  | 18 |
| DACH2         | 3.628 | 5.08E-05 | 0.000836 | 16  | 11  | 0   | 2  |
| KB-1184D12.1  | 3.238 | 5.35E-05 | 0.000875 | 13  | 17  | 1   | 2  |
| RP11-178L8.3  | 1.764 | 5.58E-05 | 0.00091  | 31  | 51  | 11  | 13 |
| RP11-180K7.1  | 6.585 | 5.59E-05 | 0.000911 | 9   | 10  | 0   | 0  |
| GNPATP        | 6.585 | 5.73E-05 | 0.000929 | 11  | 8   | 0   | 0  |
| AGGF1P1       | 1.616 | 5.92E-05 | 0.000954 | 43  | 31  | 12  | 12 |
| RP11-178A10.1 | 3.826 | 6.07E-05 | 0.000974 | 9   | 22  | 1   | 1  |
| RP11-973N13.3 | 1.399 | 6.19E-05 | 0.00099  | 41  | 49  | 18  | 16 |
| KRTAP4-1      | 1.235 | 6.39E-05 | 0.00102  | 67  | 98  | 33  | 37 |
| CMTM8         | 1.027 | 6.97E-05 | 0.0011   | 94  | 108 | 60  | 39 |
| ACVR1C        | 1.549 | 7.28E-05 | 0.00114  | 38  | 56  | 14  | 18 |
| AC104297.1    | 1.557 | 7.63E-05 | 0.00119  | 39  | 32  | 13  | 11 |
| RP11-358L22.2 | 1.19  | 8.05E-05 | 0.00125  | 57  | 71  | 28  | 28 |
| CRISP3        | 1.449 | 8.23E-05 | 0.00127  | 49  | 36  | 16  | 15 |
| VWA2          | 1.54  | 8.35E-05 | 0.00129  | 43  | 33  | 12  | 14 |
| IBSP          | 1.453 | 8.99E-05 | 0.00137  | 61  | 79  | 37  | 14 |
| AC017002.1    | 1.362 | 9.58E-05 | 0.00144  | 60  | 38  | 20  | 18 |
| C3orf55       | 1.597 | 9.64E-05 | 0.00145  | 32  | 41  | 12  | 12 |
| GSG1          | 1.796 | 9.70E-05 | 0.00146  | 38  | 25  | 7   | 11 |
| SDAD1P4       | 1.367 | 9.71E-05 | 0.00146  | 41  | 47  | 20  | 14 |
| RP11-973N13.2 | 1.309 | 9.85E-05 | 0.00148  | 64  | 75  | 20  | 36 |
| ATP10D        | 1.498 | 0.000102 | 0.00152  | 37  | 34  | 16  | 9  |
| CYP4Z2P       | 2.041 | 0.000103 | 0.00153  | 23  | 27  | 9   | 3  |

|               |       |          |         |    |     |    |    |
|---------------|-------|----------|---------|----|-----|----|----|
| RP11-204K16.1 | 6.508 | 0.000106 | 0.00157 | 8  | 10  | 0  | 0  |
| RARRES3       | 1.597 | 0.000111 | 0.00164 | 34 | 39  | 9  | 15 |
| RP11-13P5.1   | 4.334 | 0.000121 | 0.00177 | 17 | 7   | 1  | 0  |
| OTOGL         | 1.22  | 0.000132 | 0.0019  | 55 | 78  | 28 | 29 |
| CTD-2036A18.2 | 1.834 | 0.000132 | 0.00191 | 24 | 30  | 9  | 6  |
| C14orf183     | 2.63  | 0.000138 | 0.00198 | 16 | 16  | 2  | 3  |
| AC010890.1    | 1.462 | 0.00014  | 0.00199 | 36 | 47  | 19 | 11 |
| TAS2R63P      | 1.952 | 0.000142 | 0.00202 | 26 | 21  | 6  | 6  |
| SPINK6        | 2.43  | 0.000144 | 0.00205 | 18 | 26  | 1  | 7  |
| FAM49A        | 1.079 | 0.000146 | 0.00208 | 94 | 109 | 63 | 33 |
| BFSP2         | 1.748 | 0.000147 | 0.00208 | 27 | 44  | 14 | 7  |
| NRSN1         | 6.426 | 0.000147 | 0.00209 | 9  | 8   | 0  | 0  |
| ANKRD2        | 1.668 | 0.000153 | 0.00216 | 28 | 36  | 12 | 8  |
| COL4A3        | 1.415 | 0.000167 | 0.00233 | 49 | 34  | 15 | 16 |
| TEX15         | 1.228 | 0.000169 | 0.00235 | 63 | 45  | 21 | 25 |
| CTD-2554C21.3 | 2.329 | 0.000196 | 0.00268 | 15 | 26  | 4  | 4  |
| CPA6          | 1.229 | 0.000211 | 0.00285 | 54 | 40  | 23 | 17 |
| AC074093.1    | 4.073 | 0.000228 | 0.00304 | 10 | 10  | 0  | 1  |
| RP11-328J2.1  | 1.868 | 0.000235 | 0.00313 | 22 | 26  | 5  | 8  |
| AC018804.3    | 1.677 | 0.000242 | 0.00321 | 27 | 31  | 12 | 6  |
| RP11-776H12.1 | 1.41  | 0.000242 | 0.00321 | 40 | 56  | 14 | 22 |
| IL34          | 2.29  | 0.000247 | 0.00327 | 19 | 16  | 3  | 4  |
| PRKAA2        | 1.423 | 0.000276 | 0.00359 | 60 | 69  | 37 | 11 |
| ANKRD1        | 1.1   | 0.000329 | 0.00418 | 81 | 65  | 46 | 22 |
| CTD-2591A6.2  | 1.648 | 0.00033  | 0.00419 | 56 | 51  | 7  | 27 |
| BOLL          | 1.779 | 0.000338 | 0.00428 | 26 | 50  | 8  | 14 |
| RP11-360I20.2 | 3.087 | 0.000344 | 0.00433 | 10 | 17  | 3  | 0  |
| LA16c-60H5.7  | 1.093 | 0.000353 | 0.00443 | 63 | 46  | 26 | 25 |
| RP11-885L14.1 | 1.554 | 0.000355 | 0.00444 | 54 | 55  | 30 | 7  |
| DNAH6         | 1.326 | 0.000355 | 0.00445 | 41 | 37  | 13 | 18 |
| MDGA2         | 1.868 | 0.000361 | 0.00451 | 30 | 18  | 7  | 6  |
| RPL26P3       | 4     | 0.000363 | 0.00453 | 10 | 9   | 0  | 1  |
| CTC-281F24.1  | 1.01  | 0.000393 | 0.00486 | 61 | 60  | 30 | 30 |
| ZNF280A       | 1.229 | 0.000411 | 0.00505 | 46 | 41  | 16 | 21 |
| RP1-30E17.2   | 6.248 | 0.000414 | 0.00507 | 8  | 7   | 0  | 0  |
| RP11-80F22.10 | 2.421 | 0.000422 | 0.00516 | 21 | 12  | 4  | 2  |
| RP4-647C14.2  | 1.317 | 0.000423 | 0.00517 | 36 | 44  | 16 | 16 |
| UBBP2         | 1.78  | 0.000436 | 0.00531 | 23 | 29  | 11 | 4  |
| RP11-321E8.2  | 1.244 | 0.000468 | 0.00564 | 54 | 86  | 38 | 21 |
| SPAG17        | 1.174 | 0.00048  | 0.00575 | 49 | 37  | 21 | 17 |
| RP11-754I20.3 | 2.717 | 0.000486 | 0.00582 | 25 | 9   | 3  | 2  |

|               |       |          |         |    |    |    |    |
|---------------|-------|----------|---------|----|----|----|----|
| AC098973.2    | 6.426 | 0.000495 | 0.0059  | 5  | 12 | 0  | 0  |
| RP11-82I10.1  | 1.229 | 0.000505 | 0.006   | 58 | 36 | 23 | 17 |
| PLSCR4        | 1.25  | 0.000528 | 0.00622 | 37 | 37 | 18 | 13 |
| C10orf11      | 1.334 | 0.000533 | 0.00627 | 42 | 39 | 23 | 9  |
| SPDYC         | 2.377 | 0.000534 | 0.00628 | 20 | 12 | 4  | 2  |
| MAST4-IT1     | 3.033 | 0.000554 | 0.00646 | 18 | 8  | 2  | 1  |
| PRDM9         | 1.283 | 0.000583 | 0.00677 | 37 | 46 | 15 | 19 |
| RP11-439E19.7 | 2.801 | 0.000589 | 0.00682 | 12 | 31 | 6  | 0  |
| MIR4778       | 1.855 | 0.000617 | 0.00709 | 43 | 19 | 12 | 5  |
| PSG8          | 3.399 | 0.000692 | 0.00781 | 8  | 15 | 2  | 0  |
| OR4F29        | 3.268 | 0.000714 | 0.008   | 12 | 9  | 0  | 2  |
| OR4F3         | 3.268 | 0.000714 | 0.008   | 12 | 9  | 0  | 2  |
| OR4F16        | 3.268 | 0.000714 | 0.008   | 12 | 9  | 0  | 2  |
| RP11-479O17.8 | 2.377 | 0.00072  | 0.00805 | 21 | 11 | 4  | 2  |
| IL15          | 1.744 | 0.000723 | 0.00807 | 23 | 21 | 8  | 5  |
| CDH17         | 2.205 | 0.00073  | 0.00814 | 14 | 19 | 2  | 5  |
| RP11-495P10.7 | 2.182 | 0.000753 | 0.00833 | 21 | 16 | 1  | 7  |
| RAD21L1       | 1.506 | 0.000769 | 0.00847 | 37 | 23 | 11 | 10 |
| RSL24D1P8     | 6.15  | 0.000775 | 0.00854 | 8  | 6  | 0  | 0  |
| MAP6          | 1.347 | 0.00078  | 0.00858 | 30 | 39 | 17 | 10 |
| RP11-522L3.4  | 6.248 | 0.000836 | 0.0091  | 5  | 10 | 0  | 0  |
| CIDEC         | 3.268 | 0.000868 | 0.00938 | 13 | 8  | 2  | 0  |

**Table S5: Functional annotation of TRIM28 regulated genes**

| Functional annotation (GO) analysis of TRIM28 activated genes |                                                       |                   |             |           |
|---------------------------------------------------------------|-------------------------------------------------------|-------------------|-------------|-----------|
| Identifier                                                    | GO Term                                               | Genes in the list | Total genes | PValue    |
| GO:0030030                                                    | cell projection organization                          | 31                | 368         | 1.70E-06  |
| GO:0048812                                                    | neuron projection morphogenesis                       | 22                | 213         | 3.49E-06  |
| GO:0031175                                                    | neuron projection development                         | 24                | 256         | 5.87E-06  |
| GO:0048666                                                    | neuron development                                    | 28                | 339         | 8.76E-06  |
| GO:0048858                                                    | cell projection morphogenesis                         | 23                | 245         | 9.38E-06  |
| GO:0032990                                                    | cell part morphogenesis                               | 23                | 256         | 1.89E-05  |
| GO:0000902                                                    | cell morphogenesis                                    | 28                | 356         | 2.13E-05  |
| GO:0042475                                                    | odontogenesis of dentine-containing tooth             | 9                 | 39          | 2.28E-05  |
| GO:0000904                                                    | cell morphogenesis involved in differentiation        | 22                | 244         | 2.83E-05  |
| GO:0040012                                                    | regulation of locomotion                              | 19                | 192         | 3.43E-05  |
| GO:0007409                                                    | axonogenesis                                          | 19                | 193         | 3.67E-05  |
| GO:0006928                                                    | cell motion                                           | 33                | 475         | 3.96E-05  |
| GO:0030182                                                    | neuron differentiation                                | 31                | 438         | 5.13E-05  |
| GO:0007398                                                    | ectoderm development                                  | 19                | 199         | 5.50E-05  |
| GO:0042127                                                    | regulation of cell proliferation                      | 46                | 787         | 6.67E-05  |
| GO:0048667                                                    | cell morphogenesis involved in neuron differentiation | 19                | 209         | 1.04E-04  |
| GO:0043627                                                    | response to estrogen stimulus                         | 13                | 105         | 1.08E-04  |
| GO:0044057                                                    | regulation of system process                          | 24                | 309         | 1.15E-04  |
| GO:0007411                                                    | axon guidance                                         | 13                | 107         | 1.29E-04  |
| GO:0032989                                                    | cellular component morphogenesis                      | 28                | 397         | 1.37E-04  |
| GO:0042476                                                    | odontogenesis                                         | 9                 | 54          | 2.56E-04  |
| GO:0043616                                                    | keratinocyte proliferation                            | 5                 | 11          | 2.64E-04  |
| GO:0030334                                                    | regulation of cell migration                          | 16                | 169         | 2.79E-04  |
| GO:0048545                                                    | response to steroid hormone stimulus                  | 17                | 192         | 3.61E-04  |
| GO:0051270                                                    | regulation of cell motion                             | 17                | 193         | 3.83E-04  |
| GO:0001501                                                    | skeletal system development                           | 23                | 319         | 4.65E-04  |
| GO:0007586                                                    | digestion                                             | 11                | 91          | 5.48E-04  |
| GO:0008544                                                    | epidermis development                                 | 16                | 184         | 6.88E-04  |
| GO:0040017                                                    | positive regulation of locomotion                     | 11                | 98          | 9.84E-04  |
| GO:0048732                                                    | gland development                                     | 13                | 135         | 0.0010981 |

|            |                                                                                              |    |      |           |
|------------|----------------------------------------------------------------------------------------------|----|------|-----------|
| GO:0009725 | response to hormone stimulus                                                                 | 24 | 367  | 0.0012912 |
| GO:0048871 | multicellular organismal homeostasis                                                         | 10 | 85   | 0.001343  |
| GO:0007584 | response to nutrient                                                                         | 13 | 140  | 0.0015047 |
| GO:0009991 | response to extracellular stimulus                                                           | 17 | 220  | 0.0015639 |
| GO:0031328 | positive regulation of cellular biosynthetic process                                         | 37 | 685  | 0.0016621 |
| GO:0030335 | positive regulation of cell migration                                                        | 10 | 89   | 0.0018581 |
| GO:0009891 | positive regulation of biosynthetic process                                                  | 37 | 695  | 0.0021269 |
| GO:0009719 | response to endogenous stimulus                                                              | 25 | 405  | 0.0021568 |
| GO:0050927 | positive regulation of positive chemotaxis                                                   | 5  | 19   | 0.0025365 |
| GO:0050926 | regulation of positive chemotaxis                                                            | 5  | 19   | 0.0025365 |
| GO:0016477 | cell migration                                                                               | 19 | 276  | 0.0027573 |
| GO:0008283 | cell proliferation                                                                           | 26 | 436  | 0.0027621 |
| GO:0042060 | wound healing                                                                                | 15 | 191  | 0.0027989 |
| GO:0045944 | positive regulation of transcription from RNA polymerase II promoter                         | 23 | 371  | 0.0032269 |
| GO:0045596 | negative regulation of cell differentiation                                                  | 16 | 216  | 0.0033727 |
| GO:0051272 | positive regulation of cell motion                                                           | 10 | 98   | 0.0035967 |
| GO:0031667 | response to nutrient levels                                                                  | 15 | 197  | 0.0037015 |
| GO:0051674 | localization of cell                                                                         | 20 | 307  | 0.003828  |
| GO:0048870 | cell motility                                                                                | 20 | 307  | 0.003828  |
| GO:0051173 | positive regulation of nitrogen compound metabolic process                                   | 34 | 644  | 0.0038327 |
| GO:0035108 | limb morphogenesis                                                                           | 10 | 99   | 0.0038498 |
| GO:0035107 | appendage morphogenesis                                                                      | 10 | 99   | 0.0038498 |
| GO:0010033 | response to organic substance                                                                | 37 | 721  | 0.0038934 |
| GO:0008593 | regulation of Notch signaling pathway                                                        | 4  | 11   | 0.004181  |
| GO:0030850 | prostate gland development                                                                   | 4  | 11   | 0.004181  |
| GO:0045935 | positive regulation of nucleobase, nucleoside, nucleotide and nucleic acid metabolic process | 33 | 624  | 0.0043262 |
| GO:0007242 | intracellular signaling cascade                                                              | 57 | 1256 | 0.0043475 |
| GO:0045893 | positive regulation of transcription, DNA-dependent                                          | 27 | 477  | 0.004457  |
| GO:0007267 | cell-cell signaling                                                                          | 32 | 600  | 0.0044625 |
| GO:0050817 | coagulation                                                                                  | 10 | 102  | 0.0046937 |
| GO:0007596 | blood coagulation                                                                            | 10 | 102  | 0.0046937 |
| GO:0010557 | positive regulation of macromolecule biosynthetic process                                    | 34 | 654  | 0.0048228 |

GO:0050878 regulation of body fluid levels

12

141 0.0048235

### Functional annotation (GO) analysis of TRIM28 repressed genes

| Identifier | GO Term                                                          | Genes in the list | Total genes | PValue    |
|------------|------------------------------------------------------------------|-------------------|-------------|-----------|
| GO:0030198 | extracellular matrix organization                                | 10                | 104         | 3.39E-05  |
| GO:0043062 | extracellular structure organization                             | 12                | 163         | 4.72E-05  |
| GO:0051046 | regulation of secretion                                          | 11                | 202         | 0.0012235 |
| GO:0007155 | cell adhesion                                                    | 23                | 700         | 0.0013039 |
| GO:0022610 | biological adhesion                                              | 23                | 701         | 0.0013279 |
| GO:0007565 | female pregnancy                                                 | 8                 | 110         | 0.0016214 |
| GO:0001503 | ossification                                                     | 8                 | 115         | 0.0020922 |
| GO:0009743 | response to carbohydrate stimulus                                | 6                 | 60          | 0.0023481 |
| GO:0007267 | cell-cell signaling                                              | 20                | 600         | 0.0025594 |
| GO:0060348 | bone development                                                 | 8                 | 123         | 0.0030576 |
| GO:0009749 | response to glucose stimulus                                     | 5                 | 45          | 0.005112  |
| GO:0034284 | response to monosaccharide stimulus                              | 5                 | 47          | 0.0059744 |
| GO:0009746 | response to hexose stimulus                                      | 5                 | 47          | 0.0059744 |
| GO:0007584 | response to nutrient                                             | 8                 | 140         | 0.0062067 |
| GO:0051047 | positive regulation of secretion                                 | 7                 | 109         | 0.00702   |
| GO:0009991 | response to extracellular stimulus                               | 10                | 220         | 0.0074629 |
| GO:0008037 | cell recognition                                                 | 5                 | 55          | 0.0103797 |
| GO:0001501 | skeletal system development                                      | 12                | 319         | 0.0109996 |
| GO:0031667 | response to nutrient levels                                      | 9                 | 197         | 0.0117288 |
| GO:0045619 | regulation of lymphocyte differentiation                         | 5                 | 63          | 0.0164786 |
| GO:0001654 | eye development                                                  | 7                 | 132         | 0.0169731 |
| GO:0006355 | regulation of transcription, DNA-dependent                       | 39                | 1773        | 0.0233437 |
| GO:0043010 | camera-type eye development                                      | 6                 | 107         | 0.0255579 |
| GO:0010817 | regulation of hormone levels                                     | 7                 | 151         | 0.03041   |
| GO:0051252 | regulation of RNA metabolic process                              | 39                | 1813        | 0.0317557 |
| GO:0046879 | hormone secretion                                                | 4                 | 45          | 0.0324678 |
| GO:0009566 | fertilization                                                    | 5                 | 79          | 0.0343882 |
| GO:0060341 | regulation of cellular localization                              | 9                 | 248         | 0.03985   |
| GO:0009914 | hormone transport                                                | 4                 | 49          | 0.0403151 |
| GO:0007188 | G-protein signaling, coupled to cAMP nucleotide second messenger | 5                 | 85          | 0.043182  |



|            |                                                                                                                                   |   |     |           |
|------------|-----------------------------------------------------------------------------------------------------------------------------------|---|-----|-----------|
| GO:0003001 | generation of a signal involved in cell-cell signaling                                                                            | 5 | 85  | 0.043182  |
| GO:0045580 | regulation of T cell differentiation                                                                                              | 4 | 51  | 0.0445656 |
| GO:0046085 | adenosine metabolic process                                                                                                       | 2 | 3   | 0.0458542 |
| GO:0070244 | negative regulation of thymocyte apoptosis                                                                                        | 2 | 3   | 0.0458542 |
| GO:0007517 | muscle organ development                                                                                                          | 8 | 211 | 0.046655  |
| GO:0007200 | activation of phosphoinositase C activity by G-protein coupled receptor protein signaling pathway coupled to IP3 second messenger | 4 | 52  | 0.0467712 |
| GO:0001889 | liver development                                                                                                                 | 4 | 53  | 0.0490298 |

### KEGG pathway analysis s of TRIM28 activated genes

| Identifier | GO Term                              | Genes in the list | Total g | PValue    |
|------------|--------------------------------------|-------------------|---------|-----------|
| hsa00534   | Heparan sulfate biosynthesis         | 5                 | 26      | 0.0116458 |
| hsa05200   | Pathways in cancer                   | 20                | 328     | 0.0187532 |
| hsa00860   | Porphyrin and chlorophyll metabolism | 5                 | 33      | 0.0264152 |
| hsa04012   | ErbB signaling pathway               | 8                 | 87      | 0.030989  |
| hsa04540   | Gap junction                         | 8                 | 89      | 0.034505  |
| hsa04360   | Axon guidance                        | 10                | 129     | 0.0349984 |

### KEGG pathway analysis s of TRIM28 repressed genes

| Identifier | GO Term                                 | Genes in the list | Total g | PValue    |
|------------|-----------------------------------------|-------------------|---------|-----------|
| hsa04512   | ECM-receptor interaction                | 5                 | 84      | 0.0149469 |
| hsa04080   | Neuroactive ligand-receptor interaction | 8                 | 256     | 0.0252555 |
| hsa04020   | Calcium signaling pathway               | 6                 | 176     | 0.049122  |

**Table S6. List of genes co-regulated by EZH2 and TRIM28**

| <b>Genes co-activated (77)</b> | <b>Genes co-repressed (8)</b> | <b>TRIM28-activated<br/>EZH2-repressed<br/>(9)</b> | <b>TRIM28-<br/>repressed<br/>EZH2-activated<br/>(40)</b> |
|--------------------------------|-------------------------------|----------------------------------------------------|----------------------------------------------------------|
| HS3ST5                         | BAG3                          | ANXA1                                              | BTN3A2                                                   |
| RP11-347E10.1                  | ANKRD1                        | ETV4                                               | ACVR1C                                                   |
| ONECUT1/HNF6                   | RNU5A-8P                      | ATP5G1P4                                           | GAPDHP21                                                 |
| RNASE4                         | RP13-15E13.1                  | ARSB                                               | TEX15                                                    |
| EGFR                           | INHBA                         | BCYRN1                                             | VCAN                                                     |
| SLC2A12                        | RNU5B-1                       | SGK1                                               | RP11-63P12.6                                             |
| CD36                           | COL12A1                       | PRSS23                                             | RP11-46C20.1                                             |
| BCL11B                         | RNU5A-1                       | RP11-145G20.1                                      | RP11-192P9.1                                             |
| FAM81A                         |                               | RP11-109N23.1                                      | GDNF-AS1                                                 |
| OLFM2                          |                               |                                                    | RAB37                                                    |
| CNTNAP2                        |                               |                                                    | SNCAIP                                                   |
| FST                            |                               |                                                    | RP11-42I10.1                                             |
| KREMEN2                        |                               |                                                    | TP53TG3B                                                 |
| FBLN2                          |                               |                                                    | SLC5A12                                                  |
| TPTEP1                         |                               |                                                    | WTAPP1                                                   |
| GPRC5B                         |                               |                                                    | HTR2C                                                    |
| IKZF2                          |                               |                                                    | MYT1                                                     |
| MIR375                         |                               |                                                    | RP11-124L5.7                                             |
| Z83851.1                       |                               |                                                    | FAM123A                                                  |
| RP11-830F9.7                   |                               |                                                    | FRK                                                      |
| NTNG1                          |                               |                                                    | DIRC3                                                    |

GCNT2  
RP11-317J10.2  
PPARGC1A  
SULF1  
TMCC3  
PALMD  
SLCO4C1  
FAM129A  
BMP5  
RP11-284F21.7  
CXCR4  
C3  
TRPM6  
RP11-1C8.4  
SPOCD1  
MIR148A  
  
SLITRK6  
  
PCDH8  
JAKMIP1  
C1QL4  
MYEOV  
SLITRK1  
STRA6  
SYNPO2  
KIAA0226L  
GAS6  
*PADI2*  
LAMP3  
ABCB4  
RP11-61L23.2

CTC-281F24.1  
COL9A3  
COL5A2  
BATF2  
COL4A4  
COL4A3  
IGFBP5  
RP11-293M10.6  
LRP2  
PLSCR4  
RNA5SP93  
DNAH6  
RP11-174O3.3  
EDIL3  
SECTM1  
SRPX  
  
RAG1  
  
COL21A1  
STC1

AC104655.3  
FRY  
CXCL12  
KCNJ3  
KRT6A  
BAI2  
CA2  
INPP5D  
CCM2L  
CCBL1  
NPY1R  
CCDC110  
KIT  
PRODH  
SOWAHA  
FREM1  
CREB3L1  
SNCB  
GPNMB  
MAF  
HES2  
KIAA1217  
RP11-129B22.6  
SLC1A1  
HPGD  
SCIN

### Functional annotation (GO) analysis of co-activated genes

| Identifier | GO Term                                            | Genes in the list | Total genes | PValue      |
|------------|----------------------------------------------------|-------------------|-------------|-------------|
| GO:0048858 | cell projection morphogenesis                      | 8                 | 245         | 3.44E-05    |
| GO:0032990 | cell part morphogenesis                            | 8                 | 256         | 4.55E-05    |
| GO:0048812 | neuron projection morphogenesis                    | 7                 | 213         | 1.42E-04    |
| GO:0048666 | neuron development                                 | 8                 | 339         | 2.62E-04    |
| GO:0000902 | cell morphogenesis                                 | 8                 | 356         | 3.52E-04    |
| GO:0031175 | neuron projection development                      | 7                 | 256         | 3.82E-04    |
| GO:0030030 | cell projection organization                       | 8                 | 368         | 4.30E-04    |
| GO:0032989 | cellular component morphogenesis                   | 8                 | 397         | 6.75E-04    |
| GO:0040012 | regulation of locomotion                           | 6                 | 192         | 7.56E-04    |
| GO:0007409 | axonogenesis                                       | 6                 | 193         | 7.74E-04    |
| GO:0008354 | germ cell migration                                | 3                 | 12          | 8.98E-04    |
| GO:0048667 | cell morphogenesis involved in neuron differentiat | 6                 | 209         | 0.00110643  |
| GO:0030182 | neuron differentiation                             | 8                 | 438         | 0.001200885 |
| GO:0000904 | cell morphogenesis involved in differentiation     | 6                 | 244         | 0.002189057 |
| GO:0030334 | regulation of cell migration                       | 5                 | 169         | 0.003719836 |
| GO:0051094 | positive regulation of developmental process       | 6                 | 278         | 0.003838002 |
| GO:0030335 | positive regulation of cell migration              | 4                 | 89          | 0.004564017 |
| GO:0008283 | cell proliferation                                 | 7                 | 436         | 0.005718038 |
| GO:0051270 | regulation of cell motion                          | 5                 | 193         | 0.005949164 |

|            |                                                     |   |     |             |
|------------|-----------------------------------------------------|---|-----|-------------|
| GO:0040017 | positive regulation of locomotion                   | 4 | 98  | 0.005969317 |
| GO:0051272 | positive regulation of cell motion                  | 4 | 98  | 0.005969317 |
| GO:0045639 | positive regulation of myeloid cell differentiation | 3 | 33  | 0.006828209 |
| GO:0045597 | positive regulation of cell differentiation         | 5 | 229 | 0.010734299 |
| GO:0010810 | regulation of cell-substrate adhesion               | 3 | 46  | 0.012974437 |
| GO:0007389 | pattern specification process                       | 5 | 267 | 0.017943965 |
| GO:0001775 | cell activation                                     | 5 | 287 | 0.022717395 |
| GO:0045637 | regulation of myeloid cell differentiation          | 3 | 70  | 0.028590174 |
| GO:0048609 | reproductive process in a multicellular organism    | 6 | 487 | 0.035787186 |
| GO:0032504 | multicellular organism reproduction                 | 6 | 487 | 0.035787186 |
| GO:0046649 | lymphocyte activation                               | 4 | 199 | 0.038989126 |
| GO:0007155 | cell adhesion                                       | 7 | 700 | 0.046869382 |
| GO:0022610 | biological adhesion                                 | 7 | 701 | 0.047140442 |
| GO:0008045 | motor axon guidance                                 | 2 | 13  | 0.047936847 |

### KEGG pathway analysis s of co-activated genes

| Identifier | GO Term                                | Genes in the list | Total genes | PValue      |
|------------|----------------------------------------|-------------------|-------------|-------------|
| hsa04060   | Cytokine-cytokine receptor interaction | 4                 | 262         | 0.071156664 |
| hsa04360   | Axon guidance                          | 3                 | 129         | 0.082470642 |

**Functional annotation (GO) analysis of TRIM28-repressed EZH2-activated genes**

| <b>Identifier</b> | <b>GO Term</b>                              | <b>Genes in<br/>the list</b> | <b>Total genes</b> | <b>PValue</b> |
|-------------------|---------------------------------------------|------------------------------|--------------------|---------------|
| GO:0031099        | regeneration                                | 3                            | 69                 | 0.005545      |
| GO:0001503        | ossification                                | 3                            | 115                | 0.0148105     |
| GO:0060348        | bone development                            | 3                            | 123                | 0.0168203     |
| GO:0050804        | regulation of synaptic transmission         | 3                            | 136                | 0.02032       |
| GO:0051969        | regulation of transmission of nerve impulse | 3                            | 147                | 0.0234993     |
| GO:0007155        | cell adhesion                               | 5                            | 700                | 0.0246981     |
| GO:0022610        | biological adhesion                         | 5                            | 701                | 0.0248132     |
| GO:0031644        | regulation of neurological system process   | 3                            | 153                | 0.025315      |
| GO:0046928        | regulation of neurotransmitter secretion    | 2                            | 21                 | 0.0336261     |
| GO:0051588        | regulation of neurotransmitter transport    | 2                            | 26                 | 0.0414718     |
| GO:0031100        | organ regeneration                          | 2                            | 26                 | 0.0414718     |
| GO:0051046        | regulation of secretion                     | 3                            | 202                | 0.0421375     |

## **Supplementary Table S7.**

### **Top Five Categories (by P Value) of EZH2 and TRIM28co-activated genes:**

**Cell projection morphogenesis:** EGFR, SLITRK1, ONECUT1, CXCR4, BCL11B, NTNG1, SLITRK6, CXCL12

**Cell part morphogenesis:** EGFR, SLITRK1, ONECUT1, CXCR4, BCL11B, NTNG1, SLITRK6, CXCL12

**Neuron projection morphogenesis:** EGFR, SLITRK1, CXCR4, BCL11B, NTNG1, SLITRK6, CXCL12

**Neuron development:** EGFR, SLITRK1, CXCR4, BCL11B, NTNG1, CNTNAP2, SLITRK6, CXCL12

**Cell morphogenesis:** EGFR, SLITRK1, ONECUT1, CXCR4, BCL11B, NTNG1, SLITRK6, CXCL12



| <b>chr</b> | <b>start</b> | <b>end</b> | <b>Average Peak Intensity</b> |
|------------|--------------|------------|-------------------------------|
| chrY       | 10043293     | 10044379   | 5.72                          |
| chrY       | 13448262     | 13451988   | 6.73                          |
| chrY       | 13454256     | 13455599   | 5.38                          |
| chrY       | 13457705     | 13459215   | 9.75                          |
| chrY       | 13680559     | 13681164   | 6.73                          |
| chrY       | 13704141     | 13704530   | 9.08                          |
| chrY       | 13810653     | 13811330   | 4.04                          |
| chrY       | 13869169     | 13870011   | 6.39                          |
| chrY       | 58974475     | 58975871   | 6.73                          |
| chrY       | 58976093     | 58984162   | 8.07                          |
| chrY       | 58988022     | 58989319   | 4.71                          |
| chrY       | 59001468     | 59002451   | 5.05                          |
| chrX       | 9430607      | 9431583    | 4.04                          |
| chrX       | 16240985     | 16242276   | 4.04                          |
| chrX       | 16543791     | 16544836   | 4.04                          |
| chrX       | 16599332     | 16600577   | 6.39                          |
| chrX       | 23483894     | 23484878   | 1.35                          |
| chrX       | 26796343     | 26797089   | 2.35                          |
| chrX       | 33864134     | 33865247   | 0.67                          |
| chrX       | 46358526     | 46362807   | 7.06                          |
| chrX       | 47271343     | 47273555   | 9.75                          |
| chrX       | 47275779     | 47276656   | 3.36                          |
| chrX       | 47306360     | 47308834   | 4.71                          |
| chrX       | 47774602     | 47775844   | 4.37                          |
| chrX       | 47833881     | 47837475   | 7.4                           |
| chrX       | 47917883     | 47919766   | 5.05                          |
| chrX       | 52963892     | 52964735   | 1.68                          |
| chrX       | 54685803     | 54686441   | 4.37                          |
| chrX       | 55608338     | 55609745   | 1.35                          |
| chrX       | 56571461     | 56572653   | 3.03                          |
| chrX       | 57990522     | 57992290   | 8.75                          |
| chrX       | 58324092     | 58325168   | 4.04                          |
| chrX       | 58336366     | 58337947   | 6.05                          |
| chrX       | 58338849     | 58339739   | 3.7                           |
| chrX       | 58341344     | 58343250   | 4.04                          |
| chrX       | 58343791     | 58345565   | 4.71                          |
| chrX       | 58354079     | 58355667   | 4.37                          |
| chrX       | 58359961     | 58366364   | 5.38                          |
| chrX       | 58367278     | 58368402   | 3.7                           |
| chrX       | 58377830     | 58380809   | 4.37                          |
| chrX       | 58381125     | 58384202   | 5.38                          |

|      |          |          |       |
|------|----------|----------|-------|
| chrX | 58384583 | 58385772 | 3.7   |
| chrX | 58386624 | 58387648 | 3.7   |
| chrX | 58387957 | 58388927 | 4.04  |
| chrX | 58406528 | 58407336 | 4.04  |
| chrX | 58414258 | 58416317 | 4.71  |
| chrX | 58416896 | 58418732 | 4.71  |
| chrX | 58419954 | 58421107 | 3.7   |
| chrX | 58428258 | 58429118 | 3.03  |
| chrX | 58429967 | 58431136 | 3.7   |
| chrX | 58434160 | 58436805 | 4.37  |
| chrX | 58438133 | 58439994 | 4.04  |
| chrX | 58440535 | 58442360 | 3.36  |
| chrX | 58449774 | 58450610 | 3.36  |
| chrX | 58451488 | 58453110 | 4.04  |
| chrX | 58460774 | 58461734 | 3.36  |
| chrX | 58462023 | 58464272 | 4.04  |
| chrX | 58469454 | 58470471 | 4.04  |
| chrX | 58497327 | 58498521 | 3.7   |
| chrX | 58559376 | 58561899 | 7.06  |
| chrX | 58562719 | 58564246 | 7.4   |
| chrX | 61683041 | 61683838 | 12.11 |
| chrX | 61685172 | 61687824 | 6.39  |
| chrX | 61691636 | 61692022 | 11.77 |
| chrX | 61693518 | 61695285 | 6.39  |
| chrX | 61695677 | 61696794 | 9.75  |
| chrX | 61714917 | 61715882 | 6.05  |
| chrX | 61717094 | 61718619 | 26.57 |
| chrX | 61719904 | 61721241 | 5.72  |
| chrX | 61721894 | 61722725 | 3.7   |
| chrX | 61723064 | 61724778 | 4.71  |
| chrX | 61726195 | 61727004 | 4.37  |
| chrX | 61727770 | 61729873 | 3.7   |
| chrX | 61730335 | 61734685 | 9.08  |
| chrX | 61757160 | 61757939 | 3.36  |
| chrX | 61851138 | 61852097 | 5.72  |
| chrX | 61875131 | 61875905 | 6.39  |
| chrX | 61919674 | 61921143 | 4.04  |
| chrX | 61931867 | 61932693 | 2.35  |
| chrX | 61946082 | 61948271 | 5.38  |
| chrX | 61951823 | 61953168 | 4.71  |
| chrX | 61957470 | 61958405 | 4.04  |
| chrX | 61968335 | 61969645 | 4.71  |
| chrX | 61971803 | 61973207 | 4.04  |

|      |           |           |      |
|------|-----------|-----------|------|
| chrX | 61979932  | 61982802  | 4.04 |
| chrX | 61985264  | 61991694  | 5.38 |
| chrX | 61992355  | 61995832  | 4.71 |
| chrX | 61996527  | 61997313  | 2.69 |
| chrX | 62003311  | 62004121  | 1.35 |
| chrX | 62027959  | 62028856  | 2.69 |
| chrX | 62093714  | 62095005  | 1.35 |
| chrX | 62694562  | 62695907  | 7.06 |
| chrX | 67113299  | 67114485  | 8.41 |
| chrX | 67937861  | 67938725  | 0.34 |
| chrX | 68344933  | 68346014  | 1.35 |
| chrX | 71216031  | 71217458  | 1.68 |
| chrX | 71217797  | 71218618  | 1.01 |
| chrX | 71409055  | 71409862  | 1.01 |
| chrX | 71524952  | 71526144  | 1.35 |
| chrX | 72631697  | 72632547  | 1.35 |
| chrX | 72996575  | 72997662  | 1.68 |
| chrX | 73080454  | 73081595  | 1.68 |
| chrX | 73098688  | 73099604  | 1.68 |
| chrX | 73163911  | 73164770  | 5.38 |
| chrX | 73309453  | 73310738  | 5.38 |
| chrX | 73339860  | 73341147  | 2.02 |
| chrX | 73358614  | 73359363  | 2.02 |
| chrX | 73378907  | 73379713  | 1.01 |
| chrX | 73974980  | 73975878  | 1.35 |
| chrX | 74070741  | 74071584  | 2.35 |
| chrX | 77358858  | 77360421  | 4.37 |
| chrX | 78598620  | 78599502  | 1.35 |
| chrX | 79748000  | 79749157  | 1.35 |
| chrX | 80547319  | 80548296  | 3.03 |
| chrX | 82094609  | 82095694  | 4.04 |
| chrX | 83796004  | 83796757  | 2.02 |
| chrX | 83888702  | 83889554  | 1.35 |
| chrX | 83933528  | 83934733  | 1.35 |
| chrX | 86963210  | 86964093  | 2.02 |
| chrX | 87370182  | 87371039  | 1.01 |
| chrX | 94884270  | 94885541  | 7.4  |
| chrX | 95736620  | 95737463  | 4.04 |
| chrX | 100235565 | 100236380 | 3.7  |
| chrX | 101318057 | 101319260 | 5.72 |
| chrX | 102044230 | 102045727 | 5.38 |
| chrX | 102897792 | 102898750 | 1.35 |
| chrX | 102954147 | 102954997 | 4.04 |

|      |           |           |       |
|------|-----------|-----------|-------|
| chrX | 103160460 | 103161244 | 1.68  |
| chrX | 104006801 | 104008173 | 7.06  |
| chrX | 104294844 | 104295928 | 3.7   |
| chrX | 105584135 | 105586008 | 6.05  |
| chrX | 106770439 | 106771180 | 1.01  |
| chrX | 107060553 | 107063642 | 15.47 |
| chrX | 107136684 | 107137883 | 4.04  |
| chrX | 108409751 | 108410905 | 2.35  |
| chrX | 108620515 | 108621263 | 1.68  |
| chrX | 108796690 | 108798036 | 5.38  |
| chrX | 109004141 | 109005067 | 2.35  |
| chrX | 109643584 | 109644555 | 2.35  |
| chrX | 109728012 | 109729042 | 1.68  |
| chrX | 109980403 | 109981412 | 1.68  |
| chrX | 111310105 | 111311136 | 1.35  |
| chrX | 112278229 | 112279063 | 1.01  |
| chrX | 115004398 | 115005529 | 18.84 |
| chrX | 115006660 | 115007819 | 3.7   |
| chrX | 115050705 | 115051972 | 5.05  |
| chrX | 115171586 | 115172964 | 6.39  |
| chrX | 115401606 | 115402825 | 4.37  |
| chrX | 115541553 | 115542943 | 4.37  |
| chrX | 116070999 | 116072119 | 5.05  |
| chrX | 116109203 | 116110487 | 4.71  |
| chrX | 118252289 | 118253053 | 1.01  |
| chrX | 118560852 | 118561665 | 2.35  |
| chrX | 118602580 | 118603506 | 2.02  |
| chrX | 119077142 | 119078204 | 5.05  |
| chrX | 119280603 | 119282342 | 7.74  |
| chrX | 119592780 | 119593527 | 1.35  |
| chrX | 120807026 | 120808074 | 2.02  |
| chrX | 121094248 | 121095133 | 5.05  |
| chrX | 121096702 | 121098104 | 5.38  |
| chrX | 121318176 | 121319247 | 3.36  |
| chrX | 122522776 | 122524173 | 5.72  |
| chrX | 122703391 | 122704693 | 5.38  |
| chrX | 122936798 | 122938043 | 5.72  |
| chrX | 122943248 | 122944047 | 1.35  |
| chrX | 122993945 | 122995015 | 5.05  |
| chrX | 123065567 | 123066636 | 4.71  |
| chrX | 124420626 | 124421549 | 1.35  |
| chrX | 126354685 | 126355614 | 3.03  |
| chrX | 126486993 | 126487993 | 5.72  |

|       |           |           |       |
|-------|-----------|-----------|-------|
| chrX  | 129299643 | 129300417 | 3.7   |
| chrX  | 130626722 | 130627796 | 3.03  |
| chrX  | 130828324 | 130829951 | 3.36  |
| chrX  | 130873485 | 130874466 | 4.37  |
| chrX  | 131322675 | 131323372 | 2.02  |
| chrX  | 132046122 | 132047669 | 4.04  |
| chrX  | 133350255 | 133351380 | 4.37  |
| chrX  | 134416709 | 134418120 | 3.36  |
| chrX  | 134420302 | 134422823 | 9.75  |
| chrX  | 134444556 | 134445712 | 4.04  |
| chrX  | 134455683 | 134456656 | 3.7   |
| chrX  | 137016860 | 137017702 | 3.7   |
| chrX  | 139556046 | 139558146 | 11.44 |
| chrX  | 141221860 | 141223084 | 4.71  |
| chrX  | 142784109 | 142785402 | 6.05  |
| chrX  | 143998113 | 143998803 | 4.71  |
| chrX  | 147640116 | 147640890 | 0.67  |
| chrX  | 149531583 | 149533084 | 3.36  |
| chrX  | 150330726 | 150331505 | 1.35  |
| chrX  | 152063909 | 152064870 | 3.7   |
| chrX  | 152217285 | 152218133 | 4.37  |
| chrX  | 153199649 | 153200558 | 1.35  |
| chrX  | 153597337 | 153598203 | 4.37  |
| chrX  | 154670242 | 154671627 | 5.72  |
| chrX  | 154809568 | 154810570 | 3.7   |
| chr13 | 19532264  | 19533577  | 5.05  |
| chr13 | 20692626  | 20693469  | 4.37  |
| chr13 | 20701810  | 20703302  | 3.36  |
| chr13 | 20735349  | 20736286  | 1.68  |
| chr13 | 20856682  | 20861772  | 9.08  |
| chr13 | 20975596  | 20976553  | 2.35  |
| chr13 | 21073865  | 21075012  | 4.71  |
| chr13 | 21322999  | 21324204  | 3.7   |
| chr13 | 21327237  | 21329104  | 5.38  |
| chr13 | 21774245  | 21775087  | 4.04  |
| chr13 | 22012083  | 22012873  | 4.04  |
| chr13 | 22060827  | 22062211  | 4.37  |
| chr13 | 22518344  | 22519703  | 5.38  |
| chr13 | 22945883  | 22947338  | 7.06  |
| chr13 | 24258111  | 24259751  | 10.43 |
| chr13 | 24620520  | 24621707  | 5.38  |
| chr13 | 24705505  | 24706593  | 3.03  |
| chr13 | 25085208  | 25086069  | 4.04  |

|       |          |          |      |
|-------|----------|----------|------|
| chr13 | 26084817 | 26086132 | 3.7  |
| chr13 | 27010579 | 27011989 | 4.71 |
| chr13 | 27197713 | 27199319 | 5.38 |
| chr13 | 27436907 | 27437679 | 1.68 |
| chr13 | 28188264 | 28189394 | 4.71 |
| chr13 | 28194494 | 28195737 | 3.7  |
| chr13 | 29343655 | 29344560 | 3.36 |
| chr13 | 29404764 | 29405673 | 3.7  |
| chr13 | 30424097 | 30424841 | 4.04 |
| chr13 | 30632044 | 30633555 | 8.75 |
| chr13 | 30633843 | 30634651 | 4.04 |
| chr13 | 30645952 | 30646937 | 3.36 |
| chr13 | 30658946 | 30660154 | 4.71 |
| chr13 | 30688633 | 30689749 | 4.71 |
| chr13 | 30968943 | 30969909 | 3.7  |
| chr13 | 31191041 | 31192394 | 4.04 |
| chr13 | 31773893 | 31774951 | 3.36 |
| chr13 | 31887180 | 31888359 | 4.71 |
| chr13 | 31928439 | 31929986 | 5.72 |
| chr13 | 31939234 | 31941161 | 7.4  |
| chr13 | 32384060 | 32385545 | 5.05 |
| chr13 | 33183008 | 33184035 | 4.04 |
| chr13 | 33186556 | 33188103 | 3.7  |
| chr13 | 33190651 | 33193123 | 4.71 |
| chr13 | 33195256 | 33197887 | 7.06 |
| chr13 | 33435073 | 33436333 | 4.37 |
| chr13 | 33464090 | 33465191 | 3.7  |
| chr13 | 33664709 | 33665766 | 3.7  |
| chr13 | 33806598 | 33807744 | 4.71 |
| chr13 | 34050963 | 34052628 | 4.37 |
| chr13 | 34208552 | 34209515 | 3.7  |
| chr13 | 34216046 | 34217614 | 3.36 |
| chr13 | 34661490 | 34662712 | 6.73 |
| chr13 | 34969785 | 34970841 | 2.69 |
| chr13 | 35386061 | 35387262 | 4.37 |
| chr13 | 35564048 | 35564890 | 3.36 |
| chr13 | 35944916 | 35946084 | 4.71 |
| chr13 | 36580229 | 36581426 | 4.04 |
| chr13 | 36862483 | 36864021 | 7.06 |
| chr13 | 37001971 | 37002887 | 3.7  |
| chr13 | 37340771 | 37341660 | 3.7  |
| chr13 | 37574471 | 37575278 | 3.36 |
| chr13 | 39861611 | 39862378 | 2.02 |

|              |                 |                 |             |
|--------------|-----------------|-----------------|-------------|
| chr13        | 41344839        | 41345936        | 3.7         |
| chr13        | 41445093        | 41446519        | 4.04        |
| chr13        | 41447307        | 41450880        | 13.79       |
| chr13        | 41635434        | 41636256        | 3.7         |
| chr13        | 41721350        | 41727051        | 16.48       |
| chr13        | 41748661        | 41750293        | 6.39        |
| chr13        | 41841093        | 41843831        | 14.8        |
| chr13        | 41885792        | 41886554        | 3.7         |
| chr13        | 43019091        | 43021574        | 5.72        |
| chr13        | 43597394        | 43598403        | 4.04        |
| chr13        | 45707665        | 45708601        | 3.7         |
| chr13        | 46215321        | 46217291        | 7.06        |
| chr13        | 46626047        | 46627496        | 5.38        |
| chr13        | 46693954        | 46695505        | 4.04        |
| chr13        | 46708834        | 46710058        | 5.05        |
| chr13        | 46734388        | 46735242        | 3.03        |
| chr13        | 46927815        | 46929587        | 4.71        |
| chr13        | 47058172        | 47059656        | 7.4         |
| chr13        | 47119930        | 47121336        | 4.37        |
| chr13        | 47125479        | 47127682        | 4.04        |
| chr13        | 47132731        | 47133541        | 4.04        |
| chr13        | 47134880        | 47136464        | 3.7         |
| chr13        | 47136853        | 47137608        | 4.37        |
| <b>chr13</b> | <b>47140231</b> | <b>47141596</b> | <b>4.04</b> |
| chr13        | 47144398        | 47145506        | 4.04        |
| chr13        | 47167752        | 47168664        | 3.03        |
| chr13        | 47234825        | 47235795        | 4.37        |
| chr13        | 47248433        | 47249362        | 5.05        |
| chr13        | 47267843        | 47268955        | 3.7         |
| chr13        | 47368106        | 47369025        | 3.7         |
| chr13        | 47369858        | 47372691        | 5.38        |
| chr13        | 47390509        | 47391376        | 3.36        |
| chr13        | 47441633        | 47442837        | 3.03        |
| chr13        | 47467102        | 47468455        | 3.7         |
| chr13        | 47533384        | 47534248        | 2.69        |
| chr13        | 47548770        | 47550198        | 4.04        |
| chr13        | 47747459        | 47748259        | 4.04        |
| chr13        | 47753016        | 47754007        | 4.04        |
| chr13        | 47816040        | 47817058        | 2.02        |
| chr13        | 48533243        | 48535217        | 6.73        |
| chr13        | 48642629        | 48645888        | 8.07        |
| chr13        | 49125063        | 49126055        | 4.04        |
| chr13        | 49289707        | 49290985        | 4.71        |

|       |           |           |       |
|-------|-----------|-----------|-------|
| chr13 | 49354422  | 49355584  | 3.7   |
| chr13 | 50451000  | 50453325  | 15.47 |
| chr13 | 50462723  | 50463561  | 4.04  |
| chr13 | 51496884  | 51498149  | 4.04  |
| chr13 | 52640825  | 52641989  | 4.37  |
| chr13 | 52644939  | 52645794  | 4.37  |
| chr13 | 61075132  | 61076165  | 4.37  |
| chr13 | 63584287  | 63585110  | 4.37  |
| chr13 | 65952779  | 65953801  | 6.73  |
| chr13 | 68849437  | 68850806  | 6.05  |
| chr13 | 74013582  | 74015296  | 4.04  |
| chr13 | 97619712  | 97621384  | 7.4   |
| chr13 | 106974584 | 106976151 | 6.73  |
| chr13 | 109633422 | 109634167 | 1.35  |
| chr13 | 111395604 | 111397015 | 6.39  |
| chr13 | 111614025 | 111615158 | 5.38  |
| chr13 | 112643969 | 112645582 | 7.4   |
| chr13 | 113241916 | 113242774 | 4.37  |
| chr13 | 114042463 | 114043898 | 6.39  |
| chr13 | 114248705 | 114250268 | 3.7   |
| chr13 | 114251278 | 114252531 | 4.37  |
| chr13 | 114299035 | 114300011 | 3.36  |
| chr12 | 93903     | 94948     | 5.05  |
| chr12 | 162624    | 167303    | 4.37  |
| chr12 | 1530096   | 1531147   | 5.05  |
| chr12 | 2179176   | 2180333   | 5.05  |
| chr12 | 3516459   | 3517566   | 3.36  |
| chr12 | 4988300   | 4989454   | 4.71  |
| chr12 | 7320154   | 7322735   | 14.8  |
| chr12 | 7324077   | 7325447   | 8.41  |
| chr12 | 7441976   | 7443199   | 5.38  |
| chr12 | 8149815   | 8150551   | 2.35  |
| chr12 | 12800744  | 12802274  | 6.05  |
| chr12 | 14492902  | 14494045  | 3.7   |
| chr12 | 14532167  | 14533200  | 4.71  |
| chr12 | 14566133  | 14566963  | 3.36  |
| chr12 | 14626106  | 14627411  | 7.4   |
| chr12 | 14757778  | 14759497  | 12.11 |
| chr12 | 15400767  | 15401993  | 4.37  |
| chr12 | 15528617  | 15529895  | 4.37  |
| chr12 | 15942217  | 15943030  | 3.36  |
| chr12 | 18151668  | 18152935  | 2.02  |
| chr12 | 22451370  | 22453038  | 4.37  |



|              |                 |                 |             |
|--------------|-----------------|-----------------|-------------|
| chr12        | 22770212        | 22771097        | 4.37        |
| chr12        | 25859913        | 25860837        | 4.04        |
| chr12        | 26677807        | 26678434        | 2.35        |
| chr12        | 26907796        | 26909164        | 5.38        |
| chr12        | 26930139        | 26930744        | 1.35        |
| chr12        | 28362195        | 28363674        | 6.05        |
| chr12        | 29294207        | 29295209        | 4.37        |
| chr12        | 31834666        | 31835955        | 6.05        |
| chr12        | 31901684        | 31903014        | 4.71        |
| chr12        | 32001301        | 32004207        | 10.76       |
| chr12        | 32075168        | 32076742        | 4.04        |
| chr12        | 32196391        | 32197716        | 6.73        |
| <b>chr12</b> | <b>33169244</b> | <b>33174198</b> | <b>4.37</b> |
| chr12        | 33176498        | 33178094        | 3.7         |
| chr12        | 33302011        | 33302888        | 3.36        |
| chr12        | 33306037        | 33308243        | 5.05        |
| chr12        | 33379534        | 33380512        | 3.36        |
| chr12        | 33390491        | 33391897        | 3.36        |
| chr12        | 33451021        | 33452043        | 4.71        |
| chr12        | 33644493        | 33645392        | 4.37        |
| chr12        | 33703397        | 33704831        | 4.71        |
| chr12        | 33740535        | 33741945        | 4.04        |
| chr12        | 33763136        | 33764454        | 4.37        |
| chr12        | 33769552        | 33770627        | 4.04        |
| chr12        | 33849846        | 33851271        | 4.71        |
| chr12        | 33851569        | 33852423        | 4.04        |
| chr12        | 34011348        | 34012419        | 3.36        |
| chr12        | 34102072        | 34103209        | 4.71        |
| chr12        | 34435386        | 34439139        | 4.37        |
| chr12        | 34558994        | 34578274        | 6.39        |
| chr12        | 34580144        | 34581500        | 4.37        |
| chr12        | 34582812        | 34583676        | 3.36        |
| chr12        | 34589819        | 34591276        | 4.37        |
| chr12        | 34591543        | 34599089        | 7.06        |
| chr12        | 34600002        | 34614740        | 6.05        |
| chr12        | 34622749        | 34625009        | 5.38        |
| chr12        | 34625545        | 34629655        | 5.38        |
| chr12        | 34635272        | 34638389        | 5.38        |
| chr12        | 34638783        | 34647912        | 5.05        |
| chr12        | 34648389        | 34672474        | 6.39        |
| chr12        | 34684889        | 34728400        | 8.41        |
| chr12        | 34730825        | 34733668        | 7.74        |
| chr12        | 34734786        | 34750295        | 9.75        |

|       |          |          |       |
|-------|----------|----------|-------|
| chr12 | 34750804 | 34752370 | 4.04  |
| chr12 | 34752876 | 34754392 | 4.71  |
| chr12 | 34758985 | 34761428 | 3.7   |
| chr12 | 34767396 | 34772259 | 6.39  |
| chr12 | 34784344 | 34792475 | 6.73  |
| chr12 | 34798457 | 34820088 | 6.73  |
| chr12 | 34825649 | 34831429 | 5.72  |
| chr12 | 34832743 | 34834762 | 4.37  |
| chr12 | 34836070 | 34839787 | 8.41  |
| chr12 | 34840844 | 34844012 | 14.8  |
| chr12 | 34844526 | 34845440 | 3.36  |
| chr12 | 34845756 | 34852140 | 16.48 |
| chr12 | 34852632 | 34854050 | 3.7   |
| chr12 | 34854819 | 34856664 | 5.38  |
| chr12 | 38001917 | 38002838 | 5.72  |
| chr12 | 38008623 | 38009963 | 5.72  |
| chr12 | 38027738 | 38029663 | 9.42  |
| chr12 | 38045375 | 38046879 | 4.37  |
| chr12 | 38050437 | 38051900 | 7.4   |
| chr12 | 38135294 | 38136684 | 3.7   |
| chr12 | 38139835 | 38141190 | 4.04  |
| chr12 | 38143370 | 38144923 | 4.71  |
| chr12 | 38164148 | 38165381 | 5.72  |
| chr12 | 38177877 | 38178833 | 4.71  |
| chr12 | 38191980 | 38193534 | 3.36  |
| chr12 | 38204046 | 38207461 | 4.04  |
| chr12 | 38209689 | 38210819 | 4.04  |
| chr12 | 38220341 | 38221444 | 3.36  |
| chr12 | 38222347 | 38227469 | 8.75  |
| chr12 | 38228266 | 38230022 | 5.38  |
| chr12 | 38230537 | 38231653 | 3.03  |
| chr12 | 38232149 | 38237942 | 4.71  |
| chr12 | 38238808 | 38246237 | 5.38  |
| chr12 | 38250039 | 38251192 | 4.04  |
| chr12 | 38263587 | 38265983 | 4.37  |
| chr12 | 38266409 | 38276769 | 7.06  |
| chr12 | 38277960 | 38278829 | 3.03  |
| chr12 | 38279771 | 38280679 | 3.36  |
| chr12 | 38292486 | 38294452 | 4.71  |
| chr12 | 38295646 | 38304626 | 5.38  |
| chr12 | 38304928 | 38312817 | 5.72  |
| chr12 | 38313434 | 38322157 | 5.38  |
| chr12 | 38322731 | 38332680 | 5.72  |

|       |          |          |       |
|-------|----------|----------|-------|
| chr12 | 38332951 | 38334042 | 4.37  |
| chr12 | 38339829 | 38341984 | 5.72  |
| chr12 | 38343856 | 38345509 | 6.39  |
| chr12 | 38351064 | 38365309 | 5.72  |
| chr12 | 38366223 | 38367095 | 3.03  |
| chr12 | 38367596 | 38399707 | 7.06  |
| chr12 | 38400406 | 38401843 | 3.7   |
| chr12 | 38403624 | 38405074 | 2.69  |
| chr12 | 38406916 | 38409103 | 4.71  |
| chr12 | 38414696 | 38415846 | 3.7   |
| chr12 | 38417323 | 38418138 | 3.7   |
| chr12 | 38432843 | 38435747 | 4.04  |
| chr12 | 38436562 | 38439220 | 4.04  |
| chr12 | 38450043 | 38451138 | 3.7   |
| chr12 | 39836343 | 39837530 | 4.04  |
| chr12 | 40081447 | 40082383 | 1.68  |
| chr12 | 40270984 | 40273887 | 5.72  |
| chr12 | 40555071 | 40556438 | 4.37  |
| chr12 | 40557409 | 40558640 | 4.71  |
| chr12 | 40582095 | 40584472 | 4.04  |
| chr12 | 40606080 | 40606869 | 3.7   |
| chr12 | 41401851 | 41402896 | 3.7   |
| chr12 | 43010637 | 43013519 | 16.82 |
| chr12 | 44424815 | 44426213 | 7.74  |
| chr12 | 44870713 | 44872080 | 6.39  |
| chr12 | 45341979 | 45343357 | 5.38  |
| chr12 | 45571742 | 45573532 | 4.71  |
| chr12 | 46122030 | 46123179 | 4.04  |
| chr12 | 46420334 | 46422874 | 7.74  |
| chr12 | 46441901 | 46443243 | 4.71  |
| chr12 | 46444159 | 46445697 | 4.37  |
| chr12 | 46476917 | 46479853 | 7.06  |
| chr12 | 46480408 | 46481346 | 3.7   |
| chr12 | 46549721 | 46550713 | 4.04  |
| chr12 | 46582629 | 46583488 | 4.04  |
| chr12 | 46589892 | 46592430 | 4.37  |
| chr12 | 46602422 | 46603516 | 4.04  |
| chr12 | 46639605 | 46640453 | 3.36  |
| chr12 | 46675981 | 46677027 | 3.36  |
| chr12 | 46678420 | 46679679 | 5.38  |
| chr12 | 46708137 | 46709247 | 4.04  |
| chr12 | 46784909 | 46785748 | 3.03  |
| chr12 | 46849539 | 46850574 | 4.37  |

|       |          |          |      |
|-------|----------|----------|------|
| chr12 | 46899446 | 46900913 | 5.38 |
| chr12 | 46902353 | 46903491 | 4.04 |
| chr12 | 46923636 | 46925854 | 3.7  |
| chr12 | 47008447 | 47009584 | 4.04 |
| chr12 | 47032784 | 47035414 | 4.37 |
| chr12 | 47248774 | 47252987 | 7.06 |
| chr12 | 47790438 | 47791531 | 4.04 |
| chr12 | 47907412 | 47908833 | 3.7  |
| chr12 | 48000917 | 48001721 | 3.36 |
| chr12 | 48005719 | 48008093 | 9.42 |
| chr12 | 48110894 | 48111763 | 3.7  |
| chr12 | 48862416 | 48863743 | 5.05 |
| chr12 | 49007085 | 49007917 | 4.04 |
| chr12 | 49208338 | 49209277 | 4.37 |
| chr12 | 49453821 | 49454839 | 3.36 |
| chr12 | 49660414 | 49661333 | 3.7  |
| chr12 | 49690064 | 49691639 | 3.7  |
| chr12 | 49740888 | 49741882 | 3.7  |
| chr12 | 49742348 | 49743296 | 2.35 |
| chr12 | 49759939 | 49761666 | 3.7  |
| chr12 | 50035657 | 50036595 | 3.7  |
| chr12 | 50134677 | 50136233 | 4.71 |
| chr12 | 50287266 | 50288385 | 3.36 |
| chr12 | 50356628 | 50357460 | 3.7  |
| chr12 | 50360639 | 50361584 | 4.71 |
| chr12 | 50478406 | 50479604 | 4.71 |
| chr12 | 50503020 | 50504112 | 2.69 |
| chr12 | 50617777 | 50618689 | 3.03 |
| chr12 | 50634460 | 50635552 | 3.36 |
| chr12 | 50885646 | 50886712 | 4.71 |
| chr12 | 50890368 | 50894537 | 7.4  |
| chr12 | 50961485 | 50962449 | 4.37 |
| chr12 | 51012960 | 51013900 | 3.7  |
| chr12 | 51157436 | 51159123 | 4.37 |
| chr12 | 51193200 | 51194692 | 5.38 |
| chr12 | 51226521 | 51228463 | 5.38 |
| chr12 | 51305660 | 51308187 | 5.38 |
| chr12 | 51308693 | 51310953 | 7.06 |
| chr12 | 51330636 | 51333895 | 5.72 |
| chr12 | 51418057 | 51419324 | 4.37 |
| chr12 | 51421575 | 51422792 | 4.37 |
| chr12 | 51441620 | 51442584 | 4.04 |
| chr12 | 51663731 | 51664575 | 3.36 |

|       |          |          |      |
|-------|----------|----------|------|
| chr12 | 51987112 | 51988115 | 4.37 |
| chr12 | 52337594 | 52338449 | 4.04 |
| chr12 | 52463077 | 52464160 | 4.04 |
| chr12 | 52513231 | 52514126 | 4.04 |
| chr12 | 52542175 | 52543149 | 3.36 |
| chr12 | 52610708 | 52612042 | 5.05 |
| chr12 | 52637239 | 52638629 | 5.38 |
| chr12 | 52640621 | 52641969 | 5.72 |
| chr12 | 52737955 | 52739084 | 3.7  |
| chr12 | 52766069 | 52767043 | 4.04 |
| chr12 | 53059785 | 53060524 | 2.69 |
| chr12 | 53152576 | 53156844 | 4.71 |
| chr12 | 53194099 | 53194923 | 4.71 |
| chr12 | 53250303 | 53251595 | 3.7  |
| chr12 | 53262383 | 53263576 | 3.36 |
| chr12 | 53273091 | 53274263 | 5.72 |
| chr12 | 53280433 | 53281512 | 3.7  |
| chr12 | 53288577 | 53290862 | 5.05 |
| chr12 | 53293849 | 53295239 | 4.37 |
| chr12 | 53296619 | 53297985 | 6.05 |
| chr12 | 53298408 | 53299532 | 5.38 |
| chr12 | 53300444 | 53302611 | 7.06 |
| chr12 | 53319173 | 53320570 | 4.04 |
| chr12 | 53338546 | 53341424 | 5.72 |
| chr12 | 53343329 | 53344435 | 4.71 |
| chr12 | 53345256 | 53346153 | 3.7  |
| chr12 | 53346550 | 53347633 | 3.36 |
| chr12 | 53363124 | 53364779 | 5.05 |
| chr12 | 53365033 | 53366412 | 7.4  |
| chr12 | 53440086 | 53442932 | 4.37 |
| chr12 | 53447121 | 53448412 | 4.04 |
| chr12 | 53454572 | 53456243 | 3.7  |
| chr12 | 53461322 | 53462304 | 3.36 |
| chr12 | 53472617 | 53474013 | 4.04 |
| chr12 | 53491167 | 53492039 | 4.37 |
| chr12 | 53568336 | 53569460 | 4.71 |
| chr12 | 53574106 | 53575116 | 3.36 |
| chr12 | 53614468 | 53617066 | 3.7  |
| chr12 | 53617268 | 53618135 | 4.04 |
| chr12 | 53692723 | 53693833 | 4.71 |
| chr12 | 53715019 | 53716123 | 5.05 |
| chr12 | 53764304 | 53765614 | 4.71 |
| chr12 | 53814672 | 53815547 | 4.37 |

|       |          |          |       |
|-------|----------|----------|-------|
| chr12 | 53845184 | 53847006 | 6.39  |
| chr12 | 53931662 | 53932832 | 3.36  |
| chr12 | 54019283 | 54020866 | 4.37  |
| chr12 | 54069235 | 54070656 | 5.05  |
| chr12 | 54197605 | 54198997 | 5.05  |
| chr12 | 54218723 | 54219598 | 4.37  |
| chr12 | 54260868 | 54262067 | 4.04  |
| chr12 | 54331413 | 54333049 | 5.05  |
| chr12 | 54411206 | 54412386 | 4.04  |
| chr12 | 54608402 | 54609329 | 4.04  |
| chr12 | 55323521 | 55324717 | 3.7   |
| chr12 | 55963112 | 55964501 | 3.7   |
| chr12 | 56009991 | 56011605 | 4.04  |
| chr12 | 56223900 | 56225102 | 4.37  |
| chr12 | 56255683 | 56256579 | 4.37  |
| chr12 | 56258601 | 56260084 | 12.45 |
| chr12 | 56271114 | 56272188 | 4.04  |
| chr12 | 56434881 | 56435939 | 3.7   |
| chr12 | 56472714 | 56474120 | 4.04  |
| chr12 | 56497427 | 56498686 | 3.7   |
| chr12 | 56545141 | 56546845 | 4.37  |
| chr12 | 56580801 | 56581807 | 3.7   |
| chr12 | 56651181 | 56652586 | 3.7   |
| chr12 | 56836609 | 56837860 | 4.71  |
| chr12 | 57030307 | 57031129 | 4.37  |
| chr12 | 57047096 | 57048384 | 7.4   |
| chr12 | 57077639 | 57078540 | 5.05  |
| chr12 | 57081773 | 57083059 | 5.38  |
| chr12 | 57151892 | 57153311 | 4.71  |
| chr12 | 57199085 | 57199970 | 3.03  |
| chr12 | 57201660 | 57203733 | 7.74  |
| chr12 | 57249757 | 57250933 | 3.7   |
| chr12 | 57256645 | 57260090 | 7.06  |
| chr12 | 57260303 | 57261750 | 9.75  |
| chr12 | 57275095 | 57276667 | 5.05  |
| chr12 | 57292073 | 57296484 | 6.73  |
| chr12 | 57296778 | 57298582 | 4.71  |
| chr12 | 57302627 | 57303985 | 5.72  |
| chr12 | 57304257 | 57306020 | 3.36  |
| chr12 | 57323791 | 57324614 | 3.03  |
| chr12 | 57481583 | 57482478 | 3.36  |
| chr12 | 57855983 | 57857014 | 4.04  |
| chr12 | 58038263 | 58040622 | 12.45 |

|       |          |          |       |
|-------|----------|----------|-------|
| chr12 | 58047281 | 58048563 | 5.05  |
| chr12 | 58054287 | 58056464 | 7.4   |
| chr12 | 58130582 | 58132111 | 3.03  |
| chr12 | 58153861 | 58155280 | 4.04  |
| chr12 | 58165596 | 58167171 | 3.7   |
| chr12 | 58238449 | 58241068 | 4.04  |
| chr12 | 58358527 | 58359287 | 3.7   |
| chr12 | 58389920 | 58392528 | 4.37  |
| chr12 | 58393644 | 58395318 | 5.05  |
| chr12 | 58428727 | 58430655 | 4.71  |
| chr12 | 58460821 | 58461747 | 3.7   |
| chr12 | 58670566 | 58672112 | 9.08  |
| chr12 | 58700599 | 58701971 | 4.37  |
| chr12 | 58704298 | 58705471 | 4.04  |
| chr12 | 58911597 | 58913042 | 4.37  |
| chr12 | 59558326 | 59559231 | 4.04  |
| chr12 | 59646183 | 59647271 | 4.37  |
| chr12 | 60183928 | 60184829 | 3.36  |
| chr12 | 60252062 | 60253182 | 4.37  |
| chr12 | 60296253 | 60297825 | 3.03  |
| chr12 | 60323987 | 60325581 | 5.05  |
| chr12 | 60366187 | 60367000 | 3.03  |
| chr12 | 60367872 | 60368663 | 1.68  |
| chr12 | 60427439 | 60428381 | 4.04  |
| chr12 | 60465114 | 60466696 | 3.36  |
| chr12 | 60493010 | 60494392 | 4.37  |
| chr12 | 60675469 | 60676735 | 4.71  |
| chr12 | 60683042 | 60684902 | 4.71  |
| chr12 | 60689829 | 60695203 | 12.78 |
| chr12 | 60726990 | 60728046 | 4.04  |
| chr12 | 60765009 | 60766092 | 3.7   |
| chr12 | 60771432 | 60772532 | 4.71  |
| chr12 | 60809029 | 60811217 | 8.07  |
| chr12 | 60910985 | 60912709 | 4.71  |
| chr12 | 60928855 | 60929853 | 3.36  |
| chr12 | 60987266 | 60989038 | 3.7   |
| chr12 | 60996508 | 60997935 | 5.72  |
| chr12 | 61036651 | 61043280 | 14.13 |
| chr12 | 61127643 | 61128729 | 4.04  |
| chr12 | 61132480 | 61135348 | 7.74  |
| chr12 | 61292895 | 61294412 | 3.7   |
| chr12 | 61328330 | 61329367 | 3.36  |
| chr12 | 61657856 | 61659370 | 4.04  |

|       |          |          |      |
|-------|----------|----------|------|
| chr12 | 61680713 | 61682241 | 6.73 |
| chr12 | 62063992 | 62064803 | 3.03 |
| chr12 | 62087366 | 62088553 | 3.7  |
| chr12 | 62089751 | 62092191 | 6.73 |
| chr12 | 62180457 | 62181387 | 2.69 |
| chr12 | 62189654 | 62190470 | 2.35 |
| chr12 | 62415621 | 62416501 | 4.04 |
| chr12 | 62560139 | 62560940 | 1.35 |
| chr12 | 62653303 | 62654734 | 6.05 |
| chr12 | 62683747 | 62685780 | 4.04 |
| chr12 | 62811290 | 62812588 | 5.05 |
| chr12 | 62818143 | 62820333 | 4.04 |
| chr12 | 62828169 | 62830399 | 4.37 |
| chr12 | 62836852 | 62839268 | 5.05 |
| chr12 | 62856575 | 62860809 | 6.05 |
| chr12 | 62899195 | 62900495 | 3.7  |
| chr12 | 62975935 | 62976729 | 1.01 |
| chr12 | 62995661 | 62997987 | 5.38 |
| chr12 | 63033550 | 63034564 | 3.7  |
| chr12 | 63069578 | 63072398 | 5.72 |
| chr12 | 63118425 | 63119675 | 4.71 |
| chr12 | 63263491 | 63264687 | 4.04 |
| chr12 | 63327068 | 63329493 | 4.71 |
| chr12 | 63350534 | 63351848 | 5.38 |
| chr12 | 63478449 | 63479482 | 3.36 |
| chr12 | 63545396 | 63546742 | 4.37 |
| chr12 | 63568580 | 63569406 | 4.37 |
| chr12 | 63569652 | 63573953 | 9.42 |
| chr12 | 63599761 | 63601213 | 3.36 |
| chr12 | 63660399 | 63661502 | 4.37 |
| chr12 | 63684128 | 63684950 | 4.04 |
| chr12 | 63748654 | 63749516 | 3.7  |
| chr12 | 63794105 | 63795446 | 4.37 |
| chr12 | 63798343 | 63799400 | 3.36 |
| chr12 | 63800923 | 63801681 | 3.7  |
| chr12 | 63899887 | 63901482 | 4.04 |
| chr12 | 64173339 | 64174577 | 4.71 |
| chr12 | 64213429 | 64214740 | 4.71 |
| chr12 | 64237004 | 64239225 | 4.37 |
| chr12 | 64256010 | 64256820 | 3.7  |
| chr12 | 64294712 | 64295689 | 3.36 |
| chr12 | 64368377 | 64369214 | 2.02 |
| chr12 | 64403403 | 64404624 | 5.72 |



|       |          |          |      |
|-------|----------|----------|------|
| chr12 | 64425116 | 64426503 | 4.04 |
| chr12 | 64456067 | 64457031 | 2.02 |
| chr12 | 64474087 | 64475358 | 4.04 |
| chr12 | 64732180 | 64733055 | 4.71 |
| chr12 | 64741610 | 64742962 | 5.72 |
| chr12 | 64744493 | 64746957 | 5.38 |
| chr12 | 64749623 | 64750841 | 5.72 |
| chr12 | 64774264 | 64775196 | 3.7  |
| chr12 | 64797034 | 64799410 | 3.36 |
| chr12 | 64845016 | 64845944 | 3.36 |
| chr12 | 64870200 | 64871437 | 5.05 |
| chr12 | 64901175 | 64902096 | 2.69 |
| chr12 | 64967985 | 64969460 | 5.38 |
| chr12 | 65002529 | 65005997 | 4.37 |
| chr12 | 65018877 | 65020026 | 4.71 |
| chr12 | 65027000 | 65028226 | 3.7  |
| chr12 | 65168368 | 65169407 | 3.36 |
| chr12 | 65173990 | 65176353 | 5.38 |
| chr12 | 65183575 | 65184498 | 3.7  |
| chr12 | 65189515 | 65190373 | 3.7  |
| chr12 | 65214185 | 65215208 | 3.36 |
| chr12 | 65217796 | 65219714 | 3.7  |
| chr12 | 65283032 | 65284572 | 6.05 |
| chr12 | 65392235 | 65393050 | 3.36 |
| chr12 | 65413732 | 65414743 | 4.71 |
| chr12 | 65563057 | 65564960 | 3.36 |
| chr12 | 65877413 | 65878822 | 7.06 |
| chr12 | 65933434 | 65935277 | 6.05 |
| chr12 | 66000903 | 66002576 | 3.7  |
| chr12 | 66219341 | 66220425 | 1.68 |
| chr12 | 66533776 | 66535332 | 7.4  |
| chr12 | 66562988 | 66564150 | 4.37 |
| chr12 | 66956474 | 66957909 | 5.72 |
| chr12 | 67409853 | 67410792 | 1.68 |
| chr12 | 67478920 | 67480700 | 4.04 |
| chr12 | 67731879 | 67733032 | 3.36 |
| chr12 | 67880310 | 67883038 | 5.72 |
| chr12 | 67884192 | 67886447 | 5.72 |
| chr12 | 67953532 | 67954716 | 5.38 |
| chr12 | 67988786 | 67989633 | 3.7  |
| chr12 | 68067024 | 68068091 | 3.36 |
| chr12 | 68121191 | 68121981 | 3.7  |
| chr12 | 68209210 | 68210577 | 4.04 |

|       |          |          |       |
|-------|----------|----------|-------|
| chr12 | 68482596 | 68483986 | 3.7   |
| chr12 | 68940576 | 68941734 | 4.04  |
| chr12 | 69021400 | 69022592 | 4.37  |
| chr12 | 69201660 | 69203334 | 3.36  |
| chr12 | 69300472 | 69301355 | 1.35  |
| chr12 | 69381303 | 69382429 | 4.37  |
| chr12 | 69393034 | 69394197 | 4.37  |
| chr12 | 69532921 | 69534752 | 4.37  |
| chr12 | 69550591 | 69551481 | 3.7   |
| chr12 | 69582565 | 69587147 | 8.41  |
| chr12 | 69591359 | 69594165 | 4.71  |
| chr12 | 69618964 | 69620482 | 4.71  |
| chr12 | 69624583 | 69626344 | 6.05  |
| chr12 | 69632934 | 69633989 | 3.7   |
| chr12 | 69691315 | 69693225 | 6.39  |
| chr12 | 69833377 | 69834731 | 4.37  |
| chr12 | 69916054 | 69917418 | 3.7   |
| chr12 | 70161325 | 70163258 | 7.06  |
| chr12 | 70402232 | 70403764 | 5.72  |
| chr12 | 70533348 | 70535057 | 4.37  |
| chr12 | 70547789 | 70551867 | 11.77 |
| chr12 | 70607131 | 70607955 | 3.7   |
| chr12 | 70636574 | 70637490 | 3.03  |
| chr12 | 70882930 | 70884110 | 4.04  |
| chr12 | 70892113 | 70893272 | 3.7   |
| chr12 | 70915335 | 70916280 | 3.7   |
| chr12 | 71601267 | 71603013 | 11.1  |
| chr12 | 71645839 | 71646796 | 3.03  |
| chr12 | 71714491 | 71715913 | 3.03  |
| chr12 | 71813973 | 71815322 | 5.38  |
| chr12 | 71829646 | 71830438 | 3.7   |
| chr12 | 71832088 | 71832998 | 3.7   |
| chr12 | 71985925 | 71986779 | 2.69  |
| chr12 | 71987850 | 71988852 | 4.04  |
| chr12 | 72079195 | 72080347 | 4.04  |
| chr12 | 72150922 | 72158390 | 7.4   |
| chr12 | 72159157 | 72161905 | 4.04  |
| chr12 | 72254652 | 72257083 | 4.71  |
| chr12 | 72403538 | 72404625 | 1.68  |
| chr12 | 72464381 | 72465615 | 5.05  |
| chr12 | 73136008 | 73137277 | 3.7   |
| chr12 | 73140867 | 73141760 | 1.68  |
| chr12 | 73563368 | 73564336 | 5.05  |

|       |          |          |      |
|-------|----------|----------|------|
| chr12 | 73817742 | 73819137 | 6.39 |
| chr12 | 74038968 | 74040265 | 5.05 |
| chr12 | 74436948 | 74438384 | 3.7  |
| chr12 | 74631548 | 74632596 | 3.7  |
| chr12 | 74671009 | 74671840 | 2.69 |
| chr12 | 74966093 | 74966947 | 5.05 |
| chr12 | 74992634 | 74994725 | 8.07 |
| chr12 | 75031739 | 75032729 | 3.7  |
| chr12 | 75217818 | 75218672 | 4.37 |
| chr12 | 75222171 | 75223169 | 3.7  |
| chr12 | 75228088 | 75229578 | 4.04 |
| chr12 | 75230000 | 75232178 | 6.39 |
| chr12 | 75250498 | 75253240 | 6.05 |
| chr12 | 75255327 | 75256460 | 4.04 |
| chr12 | 75275627 | 75276711 | 3.36 |
| chr12 | 75278672 | 75280190 | 3.03 |
| chr12 | 75286467 | 75287420 | 3.36 |
| chr12 | 75317960 | 75319638 | 5.38 |
| chr12 | 75349409 | 75350375 | 3.36 |
| chr12 | 75363163 | 75364031 | 4.04 |
| chr12 | 75382183 | 75382995 | 4.37 |
| chr12 | 75407471 | 75408431 | 3.7  |
| chr12 | 75409372 | 75415872 | 9.75 |
| chr12 | 75420682 | 75421551 | 3.7  |
| chr12 | 75615242 | 75616527 | 4.37 |
| chr12 | 75624332 | 75625733 | 3.36 |
| chr12 | 75629332 | 75630781 | 4.71 |
| chr12 | 75631932 | 75632894 | 3.7  |
| chr12 | 75633284 | 75635429 | 6.39 |
| chr12 | 75723545 | 75724576 | 4.37 |
| chr12 | 75784615 | 75785660 | 2.69 |
| chr12 | 75819010 | 75823435 | 6.39 |
| chr12 | 75824002 | 75825163 | 4.04 |
| chr12 | 75849309 | 75852709 | 8.07 |
| chr12 | 75853253 | 75854221 | 3.7  |
| chr12 | 75904744 | 75906034 | 3.7  |
| chr12 | 76289919 | 76291050 | 4.04 |
| chr12 | 76317592 | 76319285 | 6.39 |
| chr12 | 76383835 | 76385053 | 4.04 |
| chr12 | 76423581 | 76424506 | 4.04 |
| chr12 | 76477744 | 76478721 | 3.7  |
| chr12 | 76530753 | 76531720 | 1.35 |
| chr12 | 76591697 | 76594009 | 8.07 |

|       |          |          |      |
|-------|----------|----------|------|
| chr12 | 76818037 | 76819886 | 6.73 |
| chr12 | 76825527 | 76827103 | 3.7  |
| chr12 | 76886818 | 76887998 | 4.71 |
| chr12 | 77272844 | 77273937 | 4.04 |
| chr12 | 78978386 | 78979692 | 6.05 |
| chr12 | 79087146 | 79088380 | 4.71 |
| chr12 | 79451565 | 79452617 | 4.04 |
| chr12 | 79615330 | 79616179 | 5.05 |
| chr12 | 79926342 | 79927630 | 4.71 |
| chr12 | 79940330 | 79942468 | 4.37 |
| chr12 | 79960134 | 79961043 | 3.03 |
| chr12 | 79966978 | 79968064 | 4.37 |
| chr12 | 80048554 | 80050154 | 4.04 |
| chr12 | 80082214 | 80084001 | 3.36 |
| chr12 | 80084576 | 80086017 | 4.04 |
| chr12 | 80148908 | 80150285 | 5.05 |
| chr12 | 80231116 | 80233849 | 8.75 |
| chr12 | 80405600 | 80406939 | 4.37 |
| chr12 | 81570411 | 81571461 | 5.05 |
| chr12 | 81775276 | 81776444 | 4.37 |
| chr12 | 81802567 | 81803770 | 4.04 |
| chr12 | 82607714 | 82608954 | 4.04 |
| chr12 | 82674615 | 82676059 | 6.73 |
| chr12 | 82751642 | 82753063 | 7.4  |
| chr12 | 82945983 | 82946739 | 2.35 |
| chr12 | 83079170 | 83080590 | 3.7  |
| chr12 | 83081368 | 83082264 | 4.04 |
| chr12 | 84250212 | 84251222 | 3.36 |
| chr12 | 84495123 | 84496696 | 6.39 |
| chr12 | 84541665 | 84543018 | 4.04 |
| chr12 | 85457254 | 85457960 | 1.01 |
| chr12 | 86384882 | 86386674 | 5.72 |
| chr12 | 87517855 | 87519132 | 6.05 |
| chr12 | 87559197 | 87561379 | 5.05 |
| chr12 | 87819925 | 87820785 | 3.36 |
| chr12 | 87833570 | 87834493 | 3.36 |
| chr12 | 88599478 | 88601159 | 4.71 |
| chr12 | 88606054 | 88607193 | 4.04 |
| chr12 | 88613186 | 88614418 | 5.05 |
| chr12 | 88777960 | 88779170 | 4.04 |
| chr12 | 89183817 | 89185137 | 3.7  |
| chr12 | 89307335 | 89308182 | 1.35 |
| chr12 | 89745737 | 89747159 | 9.75 |

|       |           |           |       |
|-------|-----------|-----------|-------|
| chr12 | 89919201  | 89920052  | 3.7   |
| chr12 | 90073765  | 90075054  | 4.04  |
| chr12 | 90075788  | 90076951  | 3.7   |
| chr12 | 90103304  | 90104457  | 4.04  |
| chr12 | 90132526  | 90133993  | 6.05  |
| chr12 | 90162933  | 90164415  | 3.7   |
| chr12 | 90179385  | 90182563  | 9.08  |
| chr12 | 90263833  | 90264752  | 4.04  |
| chr12 | 90514043  | 90514925  | 2.69  |
| chr12 | 90532835  | 90533686  | 3.36  |
| chr12 | 90674892  | 90676055  | 4.71  |
| chr12 | 92936954  | 92937953  | 4.37  |
| chr12 | 92993474  | 92994291  | 4.37  |
| chr12 | 93347168  | 93348415  | 5.05  |
| chr12 | 93479672  | 93481012  | 4.71  |
| chr12 | 93630832  | 93631775  | 3.7   |
| chr12 | 93647871  | 93649808  | 7.74  |
| chr12 | 93957536  | 93958428  | 4.37  |
| chr12 | 94147472  | 94148433  | 5.05  |
| chr12 | 94258974  | 94260493  | 6.05  |
| chr12 | 94409706  | 94412244  | 8.75  |
| chr12 | 94713357  | 94715230  | 6.05  |
| chr12 | 94745004  | 94745998  | 4.37  |
| chr12 | 94777817  | 94778757  | 4.71  |
| chr12 | 94814685  | 94816914  | 5.72  |
| chr12 | 95205827  | 95208262  | 12.11 |
| chr12 | 95786494  | 95787941  | 7.06  |
| chr12 | 95850936  | 95852979  | 8.75  |
| chr12 | 97197357  | 97198512  | 2.35  |
| chr12 | 97893663  | 97894946  | 5.38  |
| chr12 | 97949428  | 97950521  | 3.7   |
| chr12 | 98064819  | 98065817  | 3.36  |
| chr12 | 98140040  | 98140854  | 3.7   |
| chr12 | 98183627  | 98184833  | 3.7   |
| chr12 | 98185969  | 98187296  | 3.36  |
| chr12 | 98340747  | 98342621  | 5.72  |
| chr12 | 98350619  | 98351611  | 4.04  |
| chr12 | 98896637  | 98898345  | 4.04  |
| chr12 | 100593896 | 100594880 | 3.7   |
| chr12 | 100975735 | 100977312 | 5.38  |
| chr12 | 100981858 | 100982905 | 4.04  |
| chr12 | 101078660 | 101079937 | 5.72  |
| chr12 | 101801251 | 101802301 | 3.7   |

|       |           |           |      |
|-------|-----------|-----------|------|
| chr12 | 102270783 | 102271649 | 4.04 |
| chr12 | 102513554 | 102514651 | 3.36 |
| chr12 | 103834185 | 103836090 | 4.37 |
| chr12 | 103844005 | 103845111 | 3.7  |
| chr12 | 103968710 | 103969501 | 3.36 |
| chr12 | 104322877 | 104323739 | 4.37 |
| chr12 | 104350302 | 104351667 | 4.37 |
| chr12 | 104576516 | 104578797 | 5.38 |
| chr12 | 104612869 | 104614418 | 4.04 |
| chr12 | 104625786 | 104627302 | 7.74 |
| chr12 | 104628256 | 104629738 | 11.1 |
| chr12 | 105488649 | 105490709 | 4.37 |
| chr12 | 105928396 | 105929630 | 4.37 |
| chr12 | 106264431 | 106265423 | 3.7  |
| chr12 | 106682324 | 106683426 | 4.37 |
| chr12 | 107013920 | 107015803 | 4.71 |
| chr12 | 107167781 | 107168588 | 3.03 |
| chr12 | 107338394 | 107339925 | 3.36 |
| chr12 | 107485757 | 107486644 | 4.37 |
| chr12 | 108079029 | 108080223 | 4.04 |
| chr12 | 108184840 | 108185872 | 3.7  |
| chr12 | 109489763 | 109490898 | 4.37 |
| chr12 | 110282748 | 110283852 | 4.71 |
| chr12 | 111429903 | 111431372 | 3.36 |
| chr12 | 111435281 | 111437134 | 7.4  |
| chr12 | 111741830 | 111743309 | 6.73 |
| chr12 | 112392162 | 112393682 | 6.05 |
| chr12 | 112726074 | 112726998 | 4.37 |
| chr12 | 112812341 | 112813446 | 3.03 |
| chr12 | 113144295 | 113145131 | 1.01 |
| chr12 | 113199369 | 113200312 | 1.35 |
| chr12 | 113365045 | 113365965 | 3.7  |
| chr12 | 113440532 | 113441705 | 3.36 |
| chr12 | 113494280 | 113495074 | 2.02 |
| chr12 | 113683431 | 113685195 | 4.37 |
| chr12 | 113987007 | 113987820 | 4.04 |
| chr12 | 114062852 | 114064120 | 2.02 |
| chr12 | 115121757 | 115122743 | 4.37 |
| chr12 | 116828159 | 116829276 | 3.7  |
| chr12 | 116975820 | 116976735 | 2.35 |
| chr12 | 118406649 | 118407527 | 3.36 |
| chr12 | 118489997 | 118490863 | 4.04 |
| chr12 | 118810298 | 118811345 | 4.04 |

|       |           |           |      |
|-------|-----------|-----------|------|
| chr12 | 119916803 | 119917737 | 3.7  |
| chr12 | 120038376 | 120039229 | 0.67 |
| chr12 | 120182611 | 120183952 | 5.05 |
| chr12 | 120393602 | 120395887 | 9.08 |
| chr12 | 120516870 | 120517969 | 3.7  |
| chr12 | 120528217 | 120529034 | 1.35 |
| chr12 | 120638369 | 120639635 | 3.7  |
| chr12 | 120666435 | 120667497 | 4.04 |
| chr12 | 120668702 | 120670473 | 4.37 |
| chr12 | 120728572 | 120731294 | 4.04 |
| chr12 | 120774083 | 120776337 | 5.05 |
| chr12 | 120868088 | 120869176 | 6.05 |
| chr12 | 120907086 | 120908292 | 4.04 |
| chr12 | 121078504 | 121079406 | 2.69 |
| chr12 | 121123965 | 121125141 | 4.04 |
| chr12 | 122370495 | 122371305 | 2.35 |
| chr12 | 122582103 | 122583770 | 4.71 |
| chr12 | 122884611 | 122885415 | 4.71 |
| chr12 | 122907502 | 122908354 | 3.03 |
| chr12 | 123929966 | 123931180 | 5.05 |
| chr12 | 124085965 | 124087154 | 4.71 |
| chr12 | 124312350 | 124313183 | 3.7  |
| chr12 | 124627018 | 124628147 | 2.69 |
| chr12 | 124853236 | 124854038 | 3.36 |
| chr12 | 125121707 | 125122739 | 4.04 |
| chr12 | 125248458 | 125250168 | 4.04 |
| chr12 | 125322387 | 125323357 | 3.03 |
| chr12 | 125401397 | 125402605 | 4.37 |
| chr12 | 125423928 | 125425911 | 5.72 |
| chr12 | 125545313 | 125546646 | 6.05 |
| chr12 | 125549984 | 125550841 | 3.7  |
| chr12 | 125886991 | 125887863 | 3.7  |
| chr12 | 126553683 | 126555083 | 7.06 |
| chr12 | 127687416 | 127688183 | 1.68 |
| chr12 | 128965835 | 128966606 | 1.68 |
| chr12 | 129361219 | 129362837 | 4.04 |
| chr12 | 130491898 | 130492720 | 1.01 |
| chr12 | 131803885 | 131807494 | 7.06 |
| chr12 | 131881528 | 131883135 | 8.07 |
| chr12 | 132194896 | 132196000 | 4.37 |
| chr12 | 132314643 | 132315502 | 2.02 |
| chr12 | 132344942 | 132346022 | 3.36 |
| chr12 | 132356599 | 132357645 | 4.04 |

|       |           |           |       |
|-------|-----------|-----------|-------|
| chr12 | 132413320 | 132414292 | 4.37  |
| chr12 | 132674151 | 132675054 | 1.68  |
| chr12 | 132904895 | 132905839 | 1.68  |
| chr12 | 132906270 | 132907046 | 2.35  |
| chr12 | 133031118 | 133032190 | 2.02  |
| chr12 | 133038709 | 133039629 | 2.02  |
| chr12 | 133055422 | 133056740 | 1.68  |
| chr12 | 133082313 | 133083750 | 2.02  |
| chr12 | 133095387 | 133097732 | 3.03  |
| chr12 | 133100174 | 133101435 | 5.05  |
| chr12 | 133107802 | 133109288 | 2.35  |
| chr12 | 133110089 | 133111295 | 4.37  |
| chr12 | 133286797 | 133287922 | 2.02  |
| chr12 | 133404868 | 133405677 | 2.35  |
| chr12 | 133464507 | 133465576 | 3.03  |
| chr12 | 133475378 | 133476193 | 3.36  |
| chr12 | 133479686 | 133480481 | 4.37  |
| chr12 | 133490009 | 133491640 | 5.72  |
| chr12 | 133494219 | 133495710 | 5.38  |
| chr12 | 133496862 | 133502502 | 12.45 |
| chr12 | 133682458 | 133688950 | 15.81 |
| chr12 | 133689557 | 133700501 | 12.45 |
| chr12 | 133700737 | 133703054 | 4.37  |
| chr12 | 133706309 | 133707469 | 3.7   |
| chr12 | 133710389 | 133713654 | 4.37  |
| chr12 | 133714826 | 133718555 | 4.37  |
| chr12 | 133719184 | 133724476 | 5.05  |
| chr12 | 133729328 | 133735980 | 9.08  |
| chr12 | 133737693 | 133739376 | 3.7   |
| chr12 | 133748203 | 133749106 | 4.04  |
| chr12 | 133749374 | 133750193 | 3.03  |
| chr12 | 133756632 | 133758635 | 6.05  |
| chr12 | 133759099 | 133759928 | 3.7   |
| chr12 | 133761777 | 133764853 | 4.37  |
| chr12 | 133766554 | 133767868 | 4.71  |
| chr12 | 133769599 | 133772228 | 5.05  |
| chr12 | 133776938 | 133784890 | 18.5  |
| chr12 | 133786260 | 133787624 | 3.7   |
| chr12 | 133788275 | 133789931 | 4.04  |
| chr12 | 133790438 | 133793434 | 4.37  |
| chr12 | 133794120 | 133797032 | 5.05  |
| chr12 | 133797950 | 133799032 | 3.7   |
| chr12 | 133802862 | 133803865 | 3.36  |



|       |           |           |       |
|-------|-----------|-----------|-------|
| chr12 | 133807634 | 133809209 | 3.7   |
| chr12 | 133812307 | 133814021 | 3.7   |
| chr12 | 133816624 | 133818103 | 4.37  |
| chr11 | 1128282   | 1129385   | 5.72  |
| chr11 | 2667801   | 2668611   | 3.36  |
| chr11 | 2670224   | 2673079   | 4.04  |
| chr11 | 2675045   | 2676512   | 3.7   |
| chr11 | 2681090   | 2682781   | 6.39  |
| chr11 | 3376886   | 3378044   | 4.04  |
| chr11 | 3379471   | 3381786   | 7.4   |
| chr11 | 13855440  | 13856467  | 1.35  |
| chr11 | 16911162  | 16912296  | 4.37  |
| chr11 | 17391617  | 17394605  | 8.41  |
| chr11 | 23223903  | 23225108  | 3.7   |
| chr11 | 23790343  | 23791670  | 4.71  |
| chr11 | 24057084  | 24058378  | 4.37  |
| chr11 | 26844979  | 26846197  | 5.05  |
| chr11 | 27312423  | 27313375  | 4.04  |
| chr11 | 28158968  | 28160146  | 4.04  |
| chr11 | 28161393  | 28163082  | 4.37  |
| chr11 | 28547551  | 28548496  | 4.04  |
| chr11 | 34434035  | 34435903  | 6.73  |
| chr11 | 34920522  | 34922389  | 9.42  |
| chr11 | 35412473  | 35413417  | 3.7   |
| chr11 | 35640495  | 35641364  | 3.36  |
| chr11 | 36687749  | 36688907  | 3.7   |
| chr11 | 36856334  | 36857099  | 4.37  |
| chr11 | 37245426  | 37247082  | 5.72  |
| chr11 | 37415328  | 37416790  | 10.76 |
| chr11 | 37716381  | 37717885  | 9.75  |
| chr11 | 37967200  | 37968029  | 2.69  |
| chr11 | 38247652  | 38249280  | 7.4   |
| chr11 | 45906448  | 45907455  | 4.71  |
| chr11 | 46142327  | 46143637  | 5.72  |
| chr11 | 46260218  | 46261030  | 3.36  |
| chr11 | 46547758  | 46549033  | 4.37  |
| chr11 | 46638631  | 46639566  | 2.35  |
| chr11 | 46919822  | 46921007  | 4.71  |
| chr11 | 46957523  | 46958845  | 5.38  |
| chr11 | 46993288  | 46994085  | 1.01  |
| chr11 | 47200709  | 47201465  | 2.35  |
| chr11 | 47236300  | 47237147  | 3.7   |
| chr11 | 47269975  | 47270923  | 4.37  |

|       |          |          |      |
|-------|----------|----------|------|
| chr11 | 47290374 | 47291935 | 3.7  |
| chr11 | 47428355 | 47430536 | 4.37 |
| chr11 | 47599778 | 47601082 | 5.05 |
| chr11 | 47674211 | 47674903 | 1.68 |
| chr11 | 47787856 | 47788725 | 3.7  |
| chr11 | 47896450 | 47898957 | 8.75 |
| chr11 | 47968243 | 47969348 | 4.37 |
| chr11 | 48071226 | 48072275 | 4.04 |
| chr11 | 48136227 | 48137102 | 4.04 |
| chr11 | 48363238 | 48363960 | 2.02 |
| chr11 | 48673001 | 48673883 | 3.36 |
| chr11 | 48682178 | 48684771 | 4.71 |
| chr11 | 48685559 | 48687514 | 5.05 |
| chr11 | 48694406 | 48696694 | 4.37 |
| chr11 | 48698394 | 48699223 | 3.36 |
| chr11 | 48710574 | 48713311 | 4.04 |
| chr11 | 48717162 | 48718566 | 3.36 |
| chr11 | 48726169 | 48729491 | 5.38 |
| chr11 | 48739876 | 48741541 | 4.04 |
| chr11 | 48743654 | 48746486 | 4.04 |
| chr11 | 48746707 | 48747676 | 3.36 |
| chr11 | 48780743 | 48782020 | 4.37 |
| chr11 | 48853954 | 48855021 | 3.7  |
| chr11 | 48897875 | 48899423 | 4.37 |
| chr11 | 50020782 | 50021644 | 4.71 |
| chr11 | 50324810 | 50345491 | 7.4  |
| chr11 | 50348995 | 50366077 | 8.07 |
| chr11 | 50366355 | 50367143 | 3.03 |
| chr11 | 50382031 | 50397167 | 6.39 |
| chr11 | 50404548 | 50405564 | 4.37 |
| chr11 | 50406122 | 50417737 | 8.41 |
| chr11 | 50418957 | 50429347 | 7.74 |
| chr11 | 50430136 | 50431283 | 3.7  |
| chr11 | 50434945 | 50448309 | 7.4  |
| chr11 | 50448678 | 50449513 | 4.04 |
| chr11 | 50453944 | 50456098 | 5.05 |
| chr11 | 50458741 | 50466656 | 6.39 |
| chr11 | 50473430 | 50493510 | 7.74 |
| chr11 | 50494940 | 50502999 | 6.05 |
| chr11 | 50504073 | 50505058 | 3.7  |
| chr11 | 50508046 | 50510089 | 4.04 |
| chr11 | 50510702 | 50519791 | 5.72 |
| chr11 | 50521788 | 50527956 | 5.72 |

|       |          |          |       |
|-------|----------|----------|-------|
| chr11 | 50528281 | 50542216 | 5.72  |
| chr11 | 50542469 | 50547347 | 6.73  |
| chr11 | 50548719 | 50588527 | 7.06  |
| chr11 | 50594193 | 50595511 | 4.37  |
| chr11 | 50596609 | 50602254 | 4.71  |
| chr11 | 50602592 | 50607229 | 5.38  |
| chr11 | 50609052 | 50613193 | 6.39  |
| chr11 | 50613573 | 50624998 | 7.4   |
| chr11 | 50625275 | 50634814 | 6.39  |
| chr11 | 50635270 | 50640416 | 6.05  |
| chr11 | 50640628 | 50643943 | 5.05  |
| chr11 | 50649013 | 50650169 | 5.72  |
| chr11 | 50652088 | 50653342 | 3.36  |
| chr11 | 50722206 | 50723562 | 4.37  |
| chr11 | 50724822 | 50726157 | 5.38  |
| chr11 | 50732915 | 50734167 | 4.04  |
| chr11 | 50741115 | 50742278 | 3.7   |
| chr11 | 50754859 | 50756178 | 4.04  |
| chr11 | 50759529 | 50760660 | 4.71  |
| chr11 | 51291579 | 51293345 | 4.04  |
| chr11 | 51569045 | 51570838 | 7.4   |
| chr11 | 51571408 | 51574547 | 11.1  |
| chr11 | 51576291 | 51578974 | 8.75  |
| chr11 | 51579195 | 51579866 | 5.05  |
| chr11 | 51582971 | 51584163 | 6.39  |
| chr11 | 51590563 | 51592795 | 14.13 |
| chr11 | 59460063 | 59461255 | 3.7   |
| chr11 | 59577722 | 59578818 | 5.05  |
| chr11 | 59690362 | 59692253 | 6.73  |
| chr11 | 59936241 | 59937679 | 5.05  |
| chr11 | 60021115 | 60022565 | 5.72  |
| chr11 | 60127564 | 60128954 | 5.38  |
| chr11 | 60445161 | 60446316 | 4.04  |
| chr11 | 60925682 | 60926966 | 4.04  |
| chr11 | 61100170 | 61101023 | 2.69  |
| chr11 | 61139703 | 61141395 | 7.4   |
| chr11 | 61141958 | 61143442 | 7.06  |
| chr11 | 61276084 | 61277265 | 5.05  |
| chr11 | 61334202 | 61335620 | 5.05  |
| chr11 | 61348659 | 61349479 | 3.7   |
| chr11 | 61353922 | 61354699 | 3.7   |
| chr11 | 61467243 | 61468023 | 3.36  |
| chr11 | 61753175 | 61754150 | 4.37  |

|       |          |          |       |
|-------|----------|----------|-------|
| chr11 | 61766382 | 61767661 | 6.73  |
| chr11 | 61788607 | 61789461 | 3.36  |
| chr11 | 61854749 | 61857887 | 8.07  |
| chr11 | 61989791 | 61991556 | 9.08  |
| chr11 | 62025451 | 62026302 | 2.69  |
| chr11 | 62047689 | 62048805 | 5.38  |
| chr11 | 62049286 | 62050405 | 3.7   |
| chr11 | 62275431 | 62276786 | 3.36  |
| chr11 | 62358605 | 62359816 | 4.71  |
| chr11 | 62368464 | 62369279 | 3.7   |
| chr11 | 62420251 | 62421347 | 4.37  |
| chr11 | 62572619 | 62573416 | 1.68  |
| chr11 | 62608266 | 62609850 | 10.43 |
| chr11 | 62622142 | 62623456 | 3.7   |
| chr11 | 62761647 | 62762555 | 1.35  |
| chr11 | 62975378 | 62976793 | 3.7   |
| chr11 | 63237558 | 63238954 | 4.37  |
| chr11 | 63347209 | 63348238 | 5.05  |
| chr11 | 64007344 | 64008522 | 5.05  |
| chr11 | 64644708 | 64645519 | 3.36  |
| chr11 | 64863235 | 64863900 | 4.04  |
| chr11 | 65150148 | 65150944 | 3.7   |
| chr11 | 65189342 | 65192007 | 4.37  |
| chr11 | 65211638 | 65212847 | 1.68  |
| chr11 | 65254881 | 65256107 | 4.04  |
| chr11 | 65264659 | 65266951 | 4.37  |
| chr11 | 65307242 | 65308333 | 3.7   |
| chr11 | 65337172 | 65338078 | 3.03  |
| chr11 | 65503550 | 65505841 | 7.4   |
| chr11 | 65545063 | 65545856 | 1.68  |
| chr11 | 65551711 | 65552654 | 1.68  |
| chr11 | 65554586 | 65555410 | 2.69  |
| chr11 | 65555956 | 65556759 | 2.69  |
| chr11 | 65618285 | 65619472 | 3.36  |
| chr11 | 65627680 | 65628546 | 3.03  |
| chr11 | 65655234 | 65656925 | 4.04  |
| chr11 | 65657258 | 65659042 | 3.7   |
| chr11 | 65686142 | 65687374 | 3.7   |
| chr11 | 65756009 | 65757167 | 5.05  |
| chr11 | 65768823 | 65770557 | 5.05  |
| chr11 | 65779722 | 65781021 | 4.04  |
| chr11 | 65912638 | 65913550 | 4.04  |
| chr11 | 66024136 | 66025316 | 3.7   |

|       |          |          |       |
|-------|----------|----------|-------|
| chr11 | 66188058 | 66190018 | 7.06  |
| chr11 | 66205634 | 66206501 | 4.04  |
| chr11 | 66246174 | 66247819 | 5.05  |
| chr11 | 66313238 | 66314329 | 3.36  |
| chr11 | 66444862 | 66446377 | 3.7   |
| chr11 | 66457275 | 66458047 | 1.68  |
| chr11 | 66485547 | 66488655 | 4.04  |
| chr11 | 66494251 | 66495206 | 3.03  |
| chr11 | 66498228 | 66499675 | 2.35  |
| chr11 | 66511665 | 66512924 | 4.04  |
| chr11 | 66515977 | 66517382 | 6.05  |
| chr11 | 66535647 | 66537204 | 2.69  |
| chr11 | 66616717 | 66617566 | 4.04  |
| chr11 | 66627011 | 66627866 | 2.35  |
| chr11 | 66647944 | 66649215 | 4.37  |
| chr11 | 66746143 | 66747730 | 4.37  |
| chr11 | 66788716 | 66791871 | 3.7   |
| chr11 | 66794865 | 66796995 | 5.38  |
| chr11 | 66798112 | 66799600 | 4.71  |
| chr11 | 66800362 | 66801487 | 4.04  |
| chr11 | 66821811 | 66824416 | 4.37  |
| chr11 | 66827663 | 66828598 | 3.03  |
| chr11 | 66829426 | 66830490 | 4.71  |
| chr11 | 66848853 | 66849619 | 4.71  |
| chr11 | 66963104 | 66963969 | 2.69  |
| chr11 | 67007333 | 67008210 | 3.03  |
| chr11 | 67033321 | 67034308 | 2.35  |
| chr11 | 67070539 | 67072029 | 4.04  |
| chr11 | 67084574 | 67085993 | 3.36  |
| chr11 | 67113112 | 67114342 | 4.71  |
| chr11 | 67158584 | 67159513 | 3.36  |
| chr11 | 67179599 | 67180386 | 2.02  |
| chr11 | 67231194 | 67232950 | 3.7   |
| chr11 | 67290151 | 67290985 | 2.02  |
| chr11 | 67299907 | 67304087 | 13.12 |
| chr11 | 67317980 | 67320055 | 6.05  |
| chr11 | 67369915 | 67370785 | 4.04  |
| chr11 | 67400153 | 67401130 | 2.35  |
| chr11 | 67412784 | 67413749 | 3.36  |
| chr11 | 67422856 | 67424611 | 4.04  |
| chr11 | 67441678 | 67442960 | 5.38  |
| chr11 | 67462458 | 67463447 | 3.7   |
| chr11 | 67769674 | 67770724 | 3.36  |

|       |          |          |      |
|-------|----------|----------|------|
| chr11 | 67785642 | 67787280 | 3.03 |
| chr11 | 67899147 | 67903171 | 9.42 |
| chr11 | 67914520 | 67915401 | 4.71 |
| chr11 | 67927367 | 67928208 | 2.02 |
| chr11 | 67980340 | 67981928 | 5.05 |
| chr11 | 67996173 | 67997861 | 4.37 |
| chr11 | 68071145 | 68072530 | 5.05 |
| chr11 | 68199277 | 68200084 | 2.02 |
| chr11 | 68463538 | 68464720 | 1.35 |
| chr11 | 68606316 | 68607054 | 3.03 |
| chr11 | 68691704 | 68694143 | 6.39 |
| chr11 | 68882239 | 68883384 | 4.04 |
| chr11 | 68889843 | 68890979 | 5.05 |
| chr11 | 68913201 | 68914655 | 4.04 |
| chr11 | 68964979 | 68965788 | 2.69 |
| chr11 | 69011034 | 69011962 | 3.36 |
| chr11 | 69045275 | 69046615 | 4.37 |
| chr11 | 69061695 | 69062517 | 4.04 |
| chr11 | 69064682 | 69065431 | 3.03 |
| chr11 | 69160653 | 69161677 | 3.7  |
| chr11 | 69162688 | 69164276 | 6.05 |
| chr11 | 69174283 | 69175678 | 3.7  |
| chr11 | 69287870 | 69289226 | 5.05 |
| chr11 | 69327732 | 69328579 | 3.7  |
| chr11 | 69338512 | 69340708 | 4.04 |
| chr11 | 69450672 | 69451973 | 1.68 |
| chr11 | 69468973 | 69470341 | 4.04 |
| chr11 | 69639521 | 69640329 | 1.35 |
| chr11 | 69665854 | 69666989 | 3.03 |
| chr11 | 69795945 | 69796998 | 3.36 |
| chr11 | 69883519 | 69886792 | 5.72 |
| chr11 | 69887986 | 69890014 | 4.04 |
| chr11 | 69913721 | 69914569 | 3.36 |
| chr11 | 70078861 | 70080279 | 7.74 |
| chr11 | 70294780 | 70295637 | 3.03 |
| chr11 | 70336402 | 70337774 | 3.7  |
| chr11 | 70357987 | 70359932 | 5.05 |
| chr11 | 70596612 | 70598211 | 8.41 |
| chr11 | 70606681 | 70608575 | 2.35 |
| chr11 | 70639220 | 70640238 | 5.05 |
| chr11 | 70651443 | 70652592 | 4.37 |
| chr11 | 70788173 | 70789463 | 4.37 |
| chr11 | 70887287 | 70888396 | 4.37 |

|       |          |          |      |
|-------|----------|----------|------|
| chr11 | 70963553 | 70964513 | 3.7  |
| chr11 | 71009959 | 71010922 | 3.7  |
| chr11 | 71191813 | 71193092 | 5.38 |
| chr11 | 71290656 | 71291630 | 3.36 |
| chr11 | 71696240 | 71697049 | 2.02 |
| chr11 | 71835351 | 71840479 | 6.39 |
| chr11 | 71920625 | 71921325 | 2.35 |
| chr11 | 72217847 | 72220006 | 5.38 |
| chr11 | 72378059 | 72379301 | 3.36 |
| chr11 | 72496900 | 72497722 | 4.04 |
| chr11 | 72504374 | 72505694 | 3.7  |
| chr11 | 72835751 | 72836616 | 4.71 |
| chr11 | 72893424 | 72894617 | 4.04 |
| chr11 | 72904584 | 72906381 | 5.05 |
| chr11 | 72980311 | 72981478 | 5.05 |
| chr11 | 72982831 | 72983911 | 4.71 |
| chr11 | 72986253 | 72987236 | 3.36 |
| chr11 | 73037821 | 73038632 | 2.35 |
| chr11 | 73204827 | 73205639 | 2.69 |
| chr11 | 73308824 | 73309647 | 3.36 |
| chr11 | 73498111 | 73499840 | 5.38 |
| chr11 | 73587325 | 73588517 | 4.04 |
| chr11 | 73649507 | 73653595 | 5.05 |
| chr11 | 73687595 | 73689434 | 2.35 |
| chr11 | 73971590 | 73972333 | 4.71 |
| chr11 | 74128275 | 74129917 | 3.36 |
| chr11 | 74160117 | 74161162 | 2.69 |
| chr11 | 74250093 | 74252115 | 4.71 |
| chr11 | 74254059 | 74256010 | 8.75 |
| chr11 | 74381252 | 74382101 | 2.35 |
| chr11 | 74460314 | 74461194 | 2.69 |
| chr11 | 74534881 | 74535854 | 3.36 |
| chr11 | 74537931 | 74538664 | 4.04 |
| chr11 | 74577071 | 74583134 | 5.72 |
| chr11 | 74597467 | 74598210 | 3.03 |
| chr11 | 74609443 | 74611078 | 4.04 |
| chr11 | 74728572 | 74729706 | 3.7  |
| chr11 | 74824153 | 74825130 | 4.37 |
| chr11 | 74829402 | 74830374 | 4.37 |
| chr11 | 74910343 | 74911191 | 2.35 |
| chr11 | 75039287 | 75040192 | 3.36 |
| chr11 | 75047326 | 75048988 | 3.36 |
| chr11 | 75050601 | 75052196 | 3.7  |

|       |          |          |       |
|-------|----------|----------|-------|
| chr11 | 75053437 | 75055347 | 5.05  |
| chr11 | 75061757 | 75063015 | 4.04  |
| chr11 | 75082788 | 75084292 | 5.72  |
| chr11 | 75102801 | 75103548 | 1.68  |
| chr11 | 75110159 | 75111365 | 4.04  |
| chr11 | 75117139 | 75117972 | 3.03  |
| chr11 | 75132706 | 75134379 | 4.71  |
| chr11 | 75272874 | 75273822 | 3.03  |
| chr11 | 75300288 | 75301155 | 1.68  |
| chr11 | 75479180 | 75480088 | 3.36  |
| chr11 | 75674684 | 75675659 | 1.68  |
| chr11 | 75759100 | 75760820 | 7.4   |
| chr11 | 75946365 | 75947436 | 3.7   |
| chr11 | 75960540 | 75962196 | 4.04  |
| chr11 | 75989901 | 75990761 | 1.68  |
| chr11 | 76045412 | 76047000 | 5.72  |
| chr11 | 76155441 | 76156263 | 3.7   |
| chr11 | 76483304 | 76484216 | 3.03  |
| chr11 | 76486390 | 76488957 | 11.77 |
| chr11 | 76499033 | 76500670 | 4.04  |
| chr11 | 76524404 | 76528772 | 12.11 |
| chr11 | 76529985 | 76531472 | 4.04  |
| chr11 | 76617288 | 76618165 | 3.36  |
| chr11 | 76645838 | 76646952 | 5.05  |
| chr11 | 76688749 | 76690108 | 4.37  |
| chr11 | 76765450 | 76768887 | 8.07  |
| chr11 | 76799546 | 76800527 | 4.37  |
| chr11 | 77184698 | 77185808 | 4.04  |
| chr11 | 77291281 | 77292925 | 7.4   |
| chr11 | 77293505 | 77294677 | 7.74  |
| chr11 | 77351701 | 77352542 | 2.02  |
| chr11 | 77441416 | 77442266 | 3.7   |
| chr11 | 77524884 | 77525690 | 3.03  |
| chr11 | 77565019 | 77568813 | 7.06  |
| chr11 | 77705141 | 77706227 | 3.7   |
| chr11 | 77790245 | 77791531 | 5.72  |
| chr11 | 77850049 | 77850952 | 2.69  |
| chr11 | 77866859 | 77868323 | 6.73  |
| chr11 | 77970351 | 77971598 | 4.71  |
| chr11 | 77983362 | 77984562 | 4.71  |
| chr11 | 78040006 | 78040781 | 1.35  |
| chr11 | 78060896 | 78062076 | 4.37  |
| chr11 | 78095277 | 78097697 | 5.05  |



|       |          |          |      |
|-------|----------|----------|------|
| chr11 | 78100470 | 78101519 | 4.37 |
| chr11 | 78294095 | 78296416 | 9.42 |
| chr11 | 78710499 | 78714366 | 4.71 |
| chr11 | 78715458 | 78716348 | 3.36 |
| chr11 | 78770546 | 78771822 | 4.04 |
| chr11 | 78930356 | 78931176 | 3.36 |
| chr11 | 79412033 | 79415097 | 6.39 |
| chr11 | 79938002 | 79939761 | 4.37 |
| chr11 | 79958655 | 79959776 | 4.04 |
| chr11 | 79982258 | 79983216 | 3.7  |
| chr11 | 80204280 | 80205379 | 4.04 |
| chr11 | 80364443 | 80365559 | 5.05 |
| chr11 | 80417649 | 80418911 | 4.37 |
| chr11 | 82866019 | 82867910 | 6.05 |
| chr11 | 82871046 | 82872259 | 4.04 |
| chr11 | 83012675 | 83013633 | 2.02 |
| chr11 | 83078542 | 83079633 | 4.37 |
| chr11 | 83712896 | 83713980 | 4.37 |
| chr11 | 84288178 | 84289438 | 4.37 |
| chr11 | 84381295 | 84383252 | 5.05 |
| chr11 | 84392564 | 84393567 | 2.69 |
| chr11 | 84480114 | 84480779 | 2.69 |
| chr11 | 84695513 | 84697006 | 3.7  |
| chr11 | 84794051 | 84794924 | 3.36 |
| chr11 | 84797730 | 84798782 | 3.7  |
| chr11 | 84881568 | 84882574 | 3.03 |
| chr11 | 84912405 | 84913228 | 3.03 |
| chr11 | 84964314 | 84965249 | 3.36 |
| chr11 | 85079059 | 85081273 | 4.37 |
| chr11 | 85092623 | 85094606 | 4.04 |
| chr11 | 85132423 | 85133280 | 3.03 |
| chr11 | 85232793 | 85234991 | 5.05 |
| chr11 | 85433753 | 85434877 | 4.04 |
| chr11 | 85475021 | 85475805 | 1.01 |
| chr11 | 85531012 | 85531811 | 2.35 |
| chr11 | 85538681 | 85540399 | 4.37 |
| chr11 | 85541667 | 85542738 | 3.36 |
| chr11 | 85552913 | 85553985 | 4.04 |
| chr11 | 85555247 | 85556683 | 3.36 |
| chr11 | 85558585 | 85560146 | 3.36 |
| chr11 | 85562137 | 85563455 | 4.37 |
| chr11 | 85565165 | 85566383 | 3.7  |
| chr11 | 85655868 | 85657212 | 4.71 |

|       |           |           |      |
|-------|-----------|-----------|------|
| chr11 | 85787093  | 85787853  | 1.68 |
| chr11 | 85808154  | 85808937  | 1.35 |
| chr11 | 85955102  | 85956237  | 3.36 |
| chr11 | 86180866  | 86181670  | 3.03 |
| chr11 | 86210278  | 86211500  | 4.37 |
| chr11 | 86261786  | 86262637  | 2.35 |
| chr11 | 86318959  | 86319812  | 3.36 |
| chr11 | 86340683  | 86341552  | 1.35 |
| chr11 | 86409114  | 86411186  | 4.37 |
| chr11 | 86416736  | 86418464  | 4.04 |
| chr11 | 86501277  | 86502820  | 3.36 |
| chr11 | 93726358  | 93727826  | 9.08 |
| chr11 | 93952626  | 93953560  | 5.38 |
| chr11 | 94346156  | 94347034  | 4.04 |
| chr11 | 95677422  | 95678662  | 4.37 |
| chr11 | 101081860 | 101083099 | 4.04 |
| chr11 | 101649631 | 101650585 | 5.05 |
| chr11 | 106015753 | 106017338 | 6.05 |
| chr11 | 106037423 | 106038602 | 6.05 |
| chr11 | 115678507 | 115680022 | 5.05 |
| chr11 | 117250750 | 117251501 | 1.01 |
| chr11 | 117413154 | 117414827 | 3.36 |
| chr11 | 117415763 | 117416857 | 5.05 |
| chr11 | 117459981 | 117461454 | 2.35 |
| chr11 | 117490966 | 117492875 | 3.7  |
| chr11 | 117562103 | 117562949 | 3.03 |
| chr11 | 117688067 | 117689572 | 4.71 |
| chr11 | 117703471 | 117704999 | 4.37 |
| chr11 | 117757725 | 117759234 | 4.04 |
| chr11 | 117799657 | 117800653 | 4.37 |
| chr11 | 117856215 | 117857699 | 4.04 |
| chr11 | 117887944 | 117889084 | 4.71 |
| chr11 | 117924104 | 117924892 | 4.04 |
| chr11 | 117927878 | 117929059 | 4.71 |
| chr11 | 117931160 | 117932315 | 3.7  |
| chr11 | 117954579 | 117955654 | 3.36 |
| chr11 | 117956423 | 117959201 | 5.38 |
| chr11 | 117962146 | 117963050 | 4.37 |
| chr11 | 118015886 | 118016790 | 3.36 |
| chr11 | 118027412 | 118028298 | 3.36 |
| chr11 | 118089343 | 118090225 | 3.36 |
| chr11 | 118121933 | 118122844 | 4.37 |
| chr11 | 118297943 | 118298768 | 3.36 |

|       |           |           |       |
|-------|-----------|-----------|-------|
| chr11 | 118306098 | 118307802 | 5.38  |
| chr11 | 118352688 | 118353474 | 2.35  |
| chr11 | 118401271 | 118402503 | 4.71  |
| chr11 | 118436200 | 118437291 | 4.71  |
| chr11 | 118478113 | 118479333 | 4.71  |
| chr11 | 118560026 | 118561334 | 4.37  |
| chr11 | 118570662 | 118571885 | 4.37  |
| chr11 | 118659941 | 118661216 | 4.04  |
| chr11 | 118666809 | 118667612 | 1.35  |
| chr11 | 118740318 | 118742017 | 5.05  |
| chr11 | 118758028 | 118758981 | 3.7   |
| chr11 | 118779730 | 118784759 | 5.38  |
| chr11 | 118787114 | 118789650 | 5.72  |
| chr11 | 118791494 | 118793506 | 5.38  |
| chr11 | 118794482 | 118796206 | 3.7   |
| chr11 | 118798303 | 118800509 | 4.37  |
| chr11 | 118866741 | 118868855 | 3.36  |
| chr11 | 118898761 | 118899680 | 2.02  |
| chr11 | 118921136 | 118922083 | 2.02  |
| chr11 | 118965173 | 118966848 | 3.36  |
| chr11 | 118972083 | 118973487 | 4.04  |
| chr11 | 118978538 | 118980149 | 3.7   |
| chr11 | 119039102 | 119039939 | 2.35  |
| chr11 | 119231552 | 119232703 | 4.71  |
| chr11 | 119305499 | 119306483 | 1.01  |
| chr11 | 119954425 | 119955217 | 6.73  |
| chr11 | 119956091 | 119957526 | 5.05  |
| chr11 | 120488856 | 120489845 | 4.04  |
| chr11 | 125412460 | 125413541 | 7.06  |
| chr11 | 125422775 | 125424562 | 6.05  |
| chr11 | 129664847 | 129665667 | 3.36  |
| chr10 | 137233    | 138068    | 3.03  |
| chr10 | 138345    | 139679    | 5.05  |
| chr10 | 140580    | 144840    | 11.77 |
| chr10 | 149254    | 151308    | 6.73  |
| chr10 | 152203    | 153176    | 4.37  |
| chr10 | 179008    | 179902    | 3.7   |
| chr10 | 214137    | 216179    | 4.71  |
| chr10 | 384332    | 385239    | 3.36  |
| chr10 | 536306    | 537468    | 4.37  |
| chr10 | 609398    | 610640    | 4.71  |
| chr10 | 798334    | 800679    | 4.71  |
| chr10 | 832525    | 833384    | 2.69  |

|       |         |         |       |
|-------|---------|---------|-------|
| chr10 | 834821  | 836150  | 4.37  |
| chr10 | 842562  | 844025  | 6.73  |
| chr10 | 939705  | 940528  | 2.02  |
| chr10 | 1023586 | 1027774 | 11.44 |
| chr10 | 1094723 | 1095557 | 3.03  |
| chr10 | 1184201 | 1185123 | 3.7   |
| chr10 | 1190945 | 1192868 | 5.38  |
| chr10 | 1589964 | 1590790 | 3.36  |
| chr10 | 1778405 | 1779290 | 1.68  |
| chr10 | 3137531 | 3138464 | 3.7   |
| chr10 | 3402886 | 3405575 | 9.08  |
| chr10 | 3509318 | 3510945 | 4.37  |
| chr10 | 3825577 | 3826935 | 3.36  |
| chr10 | 4481523 | 4482626 | 3.36  |
| chr10 | 4485064 | 4485922 | 3.03  |
| chr10 | 4539139 | 4540006 | 3.7   |
| chr10 | 5112080 | 5113642 | 3.7   |
| chr10 | 5162893 | 5163927 | 4.71  |
| chr10 | 5164309 | 5165433 | 4.04  |
| chr10 | 5170185 | 5171009 | 3.36  |
| chr10 | 5191426 | 5193642 | 3.7   |
| chr10 | 5204938 | 5208546 | 14.46 |
| chr10 | 5209928 | 5210941 | 4.71  |
| chr10 | 5223190 | 5224715 | 4.04  |
| chr10 | 5305559 | 5307128 | 9.42  |
| chr10 | 5307638 | 5308513 | 3.36  |
| chr10 | 5345232 | 5346217 | 3.7   |
| chr10 | 5353860 | 5354761 | 4.04  |
| chr10 | 5431008 | 5435120 | 12.45 |
| chr10 | 5448491 | 5451030 | 4.71  |
| chr10 | 5451452 | 5452578 | 4.04  |
| chr10 | 5462979 | 5464015 | 4.04  |
| chr10 | 5503853 | 5505110 | 4.37  |
| chr10 | 5507659 | 5509150 | 4.04  |
| chr10 | 5529602 | 5532008 | 7.4   |
| chr10 | 5533047 | 5536363 | 4.04  |
| chr10 | 5538023 | 5539390 | 4.04  |
| chr10 | 5543424 | 5546389 | 7.06  |
| chr10 | 5553569 | 5554427 | 3.03  |
| chr10 | 5582577 | 5587823 | 6.73  |
| chr10 | 5588302 | 5590913 | 5.05  |
| chr10 | 5621344 | 5622063 | 3.36  |
| chr10 | 5630477 | 5632506 | 4.04  |

|       |         |         |      |
|-------|---------|---------|------|
| chr10 | 5651359 | 5652374 | 3.36 |
| chr10 | 5664678 | 5665968 | 5.05 |
| chr10 | 5726935 | 5728257 | 5.38 |
| chr10 | 6071893 | 6072881 | 3.36 |
| chr10 | 6127960 | 6129182 | 4.37 |
| chr10 | 6130104 | 6131471 | 3.7  |
| chr10 | 6339200 | 6340457 | 4.04 |
| chr10 | 6407042 | 6408016 | 3.03 |
| chr10 | 6420404 | 6423357 | 6.73 |
| chr10 | 6424807 | 6425810 | 4.04 |
| chr10 | 6443258 | 6444337 | 4.04 |
| chr10 | 6549012 | 6549874 | 1.01 |
| chr10 | 7274812 | 7276504 | 5.05 |
| chr10 | 7450304 | 7451301 | 3.03 |
| chr10 | 7903163 | 7904920 | 5.05 |
| chr10 | 8046384 | 8047427 | 3.7  |
| chr10 | 8086973 | 8088234 | 3.7  |
| chr10 | 8094302 | 8097310 | 5.38 |
| chr10 | 8111064 | 8111927 | 4.37 |
| chr10 | 8119699 | 8120591 | 3.03 |
| chr10 | 8126507 | 8127422 | 3.03 |
| chr10 | 8144964 | 8145911 | 4.71 |
| chr10 | 8202752 | 8203613 | 3.36 |
| chr10 | 8209769 | 8211297 | 3.36 |
| chr10 | 8407915 | 8409079 | 5.38 |
| chr10 | 8449300 | 8450175 | 4.04 |
| chr10 | 8499434 | 8500450 | 4.37 |
| chr10 | 8518799 | 8519968 | 4.37 |
| chr10 | 8589979 | 8591180 | 4.71 |
| chr10 | 8623500 | 8624716 | 3.7  |
| chr10 | 8644437 | 8645306 | 3.7  |
| chr10 | 8646672 | 8648169 | 5.38 |
| chr10 | 8744328 | 8745516 | 4.71 |
| chr10 | 8759837 | 8762193 | 5.38 |
| chr10 | 8828308 | 8831296 | 5.72 |
| chr10 | 8836709 | 8837963 | 4.04 |
| chr10 | 8864295 | 8865339 | 4.04 |
| chr10 | 8878592 | 8879505 | 4.37 |
| chr10 | 8884197 | 8886601 | 6.05 |
| chr10 | 8915146 | 8916003 | 3.36 |
| chr10 | 8921339 | 8922885 | 3.7  |
| chr10 | 8927206 | 8932007 | 4.71 |
| chr10 | 8948154 | 8949660 | 4.04 |

|       |          |          |       |
|-------|----------|----------|-------|
| chr10 | 8955003  | 8956001  | 3.7   |
| chr10 | 8986443  | 8987789  | 4.37  |
| chr10 | 9004267  | 9005544  | 4.37  |
| chr10 | 9008284  | 9009791  | 5.05  |
| chr10 | 9022398  | 9023864  | 3.36  |
| chr10 | 9035339  | 9036485  | 5.05  |
| chr10 | 9037522  | 9038689  | 4.37  |
| chr10 | 9059297  | 9059993  | 2.35  |
| chr10 | 9079776  | 9081127  | 4.71  |
| chr10 | 9086476  | 9088238  | 3.36  |
| chr10 | 9090619  | 9092211  | 4.71  |
| chr10 | 9093282  | 9096194  | 4.37  |
| chr10 | 9114979  | 9115908  | 3.36  |
| chr10 | 9121075  | 9122659  | 3.36  |
| chr10 | 9123434  | 9125645  | 4.37  |
| chr10 | 9126011  | 9126977  | 3.7   |
| chr10 | 9127632  | 9131688  | 6.73  |
| chr10 | 9133262  | 9134562  | 3.7   |
| chr10 | 9137678  | 9138628  | 3.7   |
| chr10 | 9144328  | 9145392  | 3.7   |
| chr10 | 9163072  | 9164683  | 4.04  |
| chr10 | 9165689  | 9168192  | 4.71  |
| chr10 | 9170279  | 9171300  | 3.36  |
| chr10 | 9173518  | 9174511  | 3.7   |
| chr10 | 9178422  | 9179335  | 3.7   |
| chr10 | 9185348  | 9186811  | 3.7   |
| chr10 | 9189862  | 9193364  | 5.05  |
| chr10 | 9198803  | 9207254  | 11.77 |
| chr10 | 9209264  | 9210124  | 3.36  |
| chr10 | 9213532  | 9215059  | 4.04  |
| chr10 | 9219375  | 9221098  | 3.7   |
| chr10 | 9229605  | 9231314  | 4.71  |
| chr10 | 9237169  | 9239419  | 4.71  |
| chr10 | 9239739  | 9241407  | 4.37  |
| chr10 | 9250652  | 9252004  | 5.72  |
| chr10 | 9253090  | 9253980  | 3.7   |
| chr10 | 9257787  | 9258741  | 3.7   |
| chr10 | 9266285  | 9269974  | 4.04  |
| chr10 | 9273493  | 9274691  | 3.36  |
| chr10 | 9495780  | 9496758  | 5.38  |
| chr10 | 9753757  | 9755276  | 3.03  |
| chr10 | 10913918 | 10914945 | 3.03  |
| chr10 | 11135864 | 11136857 | 3.7   |

|       |          |          |       |
|-------|----------|----------|-------|
| chr10 | 11349578 | 11350705 | 4.04  |
| chr10 | 11771705 | 11773017 | 5.72  |
| chr10 | 13026208 | 13027171 | 3.36  |
| chr10 | 13120561 | 13121702 | 6.73  |
| chr10 | 13124912 | 13126554 | 9.08  |
| chr10 | 13343958 | 13344937 | 4.37  |
| chr10 | 13553741 | 13554536 | 1.35  |
| chr10 | 13628338 | 13629584 | 4.71  |
| chr10 | 13630846 | 13632163 | 4.37  |
| chr10 | 13632821 | 13633872 | 4.04  |
| chr10 | 14956111 | 14957703 | 3.7   |
| chr10 | 15000880 | 15002371 | 3.36  |
| chr10 | 16756203 | 16757059 | 3.03  |
| chr10 | 16864226 | 16865605 | 6.05  |
| chr10 | 17303926 | 17307220 | 4.71  |
| chr10 | 17323902 | 17325201 | 5.05  |
| chr10 | 19033938 | 19034837 | 1.68  |
| chr10 | 19276689 | 19278248 | 6.39  |
| chr10 | 19301957 | 19302968 | 3.7   |
| chr10 | 19521386 | 19522205 | 3.7   |
| chr10 | 20792053 | 20792749 | 1.68  |
| chr10 | 20872087 | 20873178 | 3.7   |
| chr10 | 21346757 | 21348520 | 3.7   |
| chr10 | 21473343 | 21474141 | 3.03  |
| chr10 | 21485596 | 21488152 | 10.76 |
| chr10 | 21496359 | 21497752 | 3.36  |
| chr10 | 21653031 | 21653958 | 3.7   |
| chr10 | 21683686 | 21684585 | 5.05  |
| chr10 | 21897172 | 21898065 | 3.36  |
| chr10 | 21989118 | 21990112 | 3.7   |
| chr10 | 22113803 | 22118118 | 6.39  |
| chr10 | 22118828 | 22120364 | 3.36  |
| chr10 | 22358943 | 22359846 | 4.04  |
| chr10 | 22393496 | 22394988 | 3.36  |
| chr10 | 23179869 | 23181620 | 4.04  |
| chr10 | 23197341 | 23198574 | 7.74  |
| chr10 | 23384731 | 23385672 | 3.7   |
| chr10 | 23860279 | 23861665 | 2.02  |
| chr10 | 24527210 | 24528257 | 4.37  |
| chr10 | 24615651 | 24616816 | 4.04  |
| chr10 | 25645440 | 25647490 | 7.06  |
| chr10 | 25677004 | 25680464 | 5.38  |
| chr10 | 27779768 | 27781109 | 5.72  |

|       |          |          |       |
|-------|----------|----------|-------|
| chr10 | 28784993 | 28786074 | 3.36  |
| chr10 | 29133452 | 29134811 | 4.37  |
| chr10 | 29145257 | 29146990 | 3.7   |
| chr10 | 29228231 | 29229535 | 3.36  |
| chr10 | 29413381 | 29414399 | 4.04  |
| chr10 | 29438411 | 29439336 | 3.36  |
| chr10 | 29454786 | 29456678 | 7.74  |
| chr10 | 29498137 | 29499493 | 3.7   |
| chr10 | 29500957 | 29501727 | 3.36  |
| chr10 | 29584693 | 29591477 | 9.75  |
| chr10 | 29694669 | 29697404 | 8.41  |
| chr10 | 29727037 | 29728255 | 5.38  |
| chr10 | 30025665 | 30026562 | 2.02  |
| chr10 | 30271003 | 30272745 | 4.04  |
| chr10 | 31795848 | 31797172 | 2.35  |
| chr10 | 31832176 | 31833477 | 3.7   |
| chr10 | 31846302 | 31847161 | 2.35  |
| chr10 | 31861466 | 31862487 | 4.37  |
| chr10 | 31913240 | 31914784 | 3.7   |
| chr10 | 31971963 | 31973439 | 6.73  |
| chr10 | 31977580 | 31978627 | 4.04  |
| chr10 | 31991715 | 31992828 | 4.71  |
| chr10 | 32216400 | 32217853 | 3.36  |
| chr10 | 32231324 | 32232247 | 3.7   |
| chr10 | 32242684 | 32244736 | 7.74  |
| chr10 | 32410634 | 32412591 | 5.38  |
| chr10 | 32442057 | 32443093 | 3.36  |
| chr10 | 32945888 | 32947295 | 5.38  |
| chr10 | 32966155 | 32967012 | 3.36  |
| chr10 | 33051318 | 33052073 | 1.35  |
| chr10 | 33654530 | 33656038 | 4.71  |
| chr10 | 35679770 | 35680736 | 5.05  |
| chr10 | 35732015 | 35734217 | 8.07  |
| chr10 | 36355291 | 36356723 | 4.71  |
| chr10 | 37610018 | 37612252 | 7.74  |
| chr10 | 38082741 | 38084336 | 4.04  |
| chr10 | 38101293 | 38102193 | 4.04  |
| chr10 | 38115089 | 38116610 | 3.7   |
| chr10 | 38117613 | 38119018 | 3.03  |
| chr10 | 38119585 | 38125206 | 9.08  |
| chr10 | 38128675 | 38129518 | 3.03  |
| chr10 | 38180163 | 38181056 | 3.7   |
| chr10 | 38182928 | 38186292 | 10.76 |



|       |          |          |       |
|-------|----------|----------|-------|
| chr10 | 38239998 | 38243757 | 4.04  |
| chr10 | 38253254 | 38254867 | 4.71  |
| chr10 | 38255380 | 38256648 | 3.7   |
| chr10 | 38336969 | 38337958 | 5.72  |
| chr10 | 38342466 | 38347018 | 8.07  |
| chr10 | 38364769 | 38366249 | 3.7   |
| chr10 | 38402861 | 38409157 | 12.78 |
| chr10 | 38410092 | 38411523 | 4.37  |
| chr10 | 38773917 | 38777120 | 6.73  |
| chr10 | 38788881 | 38789909 | 4.71  |
| chr10 | 38797709 | 38799554 | 5.38  |
| chr10 | 38805934 | 38806999 | 5.38  |
| chr10 | 38815492 | 38818997 | 11.44 |
| chr10 | 38871443 | 38872769 | 8.41  |
| chr10 | 38873376 | 38874331 | 4.71  |
| chr10 | 38876738 | 38877899 | 4.71  |
| chr10 | 38880306 | 38882716 | 6.39  |
| chr10 | 39111199 | 39112301 | 3.7   |
| chr10 | 39137459 | 39138769 | 8.41  |
| chr10 | 39143730 | 39144984 | 4.71  |
| chr10 | 42354802 | 42363308 | 11.1  |
| chr10 | 42363940 | 42365944 | 8.75  |
| chr10 | 42368710 | 42370197 | 5.72  |
| chr10 | 42373616 | 42403104 | 22.2  |
| chr10 | 42403770 | 42405746 | 6.05  |
| chr10 | 42406028 | 42409806 | 7.4   |
| chr10 | 42432439 | 42433449 | 4.37  |
| chr10 | 42451108 | 42455129 | 4.04  |
| chr10 | 42456394 | 42459422 | 4.04  |
| chr10 | 42459981 | 42461946 | 3.7   |
| chr10 | 42464825 | 42469055 | 4.71  |
| chr10 | 42473378 | 42477780 | 4.37  |
| chr10 | 42478504 | 42481340 | 4.37  |
| chr10 | 42481933 | 42483055 | 3.7   |
| chr10 | 42490800 | 42493682 | 5.38  |
| chr10 | 42494071 | 42497248 | 5.38  |
| chr10 | 42498981 | 42502514 | 3.7   |
| chr10 | 42503854 | 42504846 | 3.03  |
| chr10 | 42506052 | 42511835 | 5.05  |
| chr10 | 42512074 | 42514735 | 5.05  |
| chr10 | 42515438 | 42517575 | 4.04  |
| chr10 | 42520384 | 42523723 | 4.37  |
| chr10 | 42526752 | 42528320 | 7.4   |

|       |          |          |       |
|-------|----------|----------|-------|
| chr10 | 42528635 | 42533435 | 20.52 |
| chr10 | 42534551 | 42535440 | 8.07  |
| chr10 | 42538027 | 42539774 | 8.75  |
| chr10 | 42596533 | 42600797 | 17.49 |
| chr10 | 42794366 | 42795335 | 4.37  |
| chr10 | 42796381 | 42797571 | 4.37  |
| chr10 | 42807328 | 42808750 | 4.71  |
| chr10 | 42813428 | 42814344 | 3.7   |
| chr10 | 42815913 | 42818537 | 6.39  |
| chr10 | 42830082 | 42833489 | 5.72  |
| chr10 | 43014145 | 43017069 | 8.75  |
| chr10 | 43036338 | 43037771 | 3.36  |
| chr10 | 43039162 | 43040193 | 5.05  |
| chr10 | 43074891 | 43075871 | 4.37  |
| chr10 | 43078650 | 43080137 | 4.71  |
| chr10 | 43083770 | 43085964 | 4.04  |
| chr10 | 43086356 | 43089864 | 11.44 |
| chr10 | 43266520 | 43268470 | 4.37  |
| chr10 | 43277481 | 43278604 | 4.37  |
| chr10 | 43377632 | 43378847 | 3.7   |
| chr10 | 43396569 | 43398255 | 4.04  |
| chr10 | 43521400 | 43522626 | 4.71  |
| chr10 | 43528015 | 43529384 | 4.04  |
| chr10 | 43901858 | 43903462 | 3.7   |
| chr10 | 43915406 | 43916288 | 3.36  |
| chr10 | 43974274 | 43975352 | 4.37  |
| chr10 | 43976209 | 43979108 | 7.74  |
| chr10 | 43979770 | 43981868 | 3.7   |
| chr10 | 44011599 | 44012588 | 4.04  |
| chr10 | 44015884 | 44017440 | 3.7   |
| chr10 | 44018194 | 44022651 | 12.78 |
| chr10 | 44031316 | 44032782 | 4.37  |
| chr10 | 44050090 | 44051428 | 3.7   |
| chr10 | 44051885 | 44053741 | 4.37  |
| chr10 | 44064690 | 44066046 | 5.38  |
| chr10 | 44068655 | 44069907 | 3.7   |
| chr10 | 44094044 | 44096112 | 3.7   |
| chr10 | 44101226 | 44103028 | 4.04  |
| chr10 | 44108149 | 44114739 | 9.08  |
| chr10 | 44114991 | 44116535 | 3.36  |
| chr10 | 44116852 | 44118334 | 4.71  |
| chr10 | 44136653 | 44142371 | 8.41  |
| chr10 | 44731905 | 44732779 | 3.03  |

|       |          |          |       |
|-------|----------|----------|-------|
| chr10 | 44940106 | 44941035 | 4.37  |
| chr10 | 46966686 | 46967817 | 4.37  |
| chr10 | 46968788 | 46969619 | 2.02  |
| chr10 | 46980359 | 46981370 | 2.02  |
| chr10 | 46983185 | 46984587 | 4.37  |
| chr10 | 46987756 | 46988938 | 2.69  |
| chr10 | 46995472 | 46996412 | 2.69  |
| chr10 | 47011897 | 47013033 | 2.35  |
| chr10 | 47030496 | 47031557 | 3.7   |
| chr10 | 47031913 | 47033325 | 3.03  |
| chr10 | 47037313 | 47038785 | 2.35  |
| chr10 | 47056445 | 47057953 | 3.36  |
| chr10 | 47070439 | 47071784 | 3.03  |
| chr10 | 47077428 | 47078620 | 2.69  |
| chr10 | 47083590 | 47084952 | 4.37  |
| chr10 | 47085495 | 47086720 | 3.03  |
| chr10 | 47097832 | 47098954 | 2.35  |
| chr10 | 47111745 | 47112686 | 1.68  |
| chr10 | 47112941 | 47113774 | 2.69  |
| chr10 | 47114719 | 47116027 | 3.03  |
| chr10 | 47130123 | 47130933 | 2.69  |
| chr10 | 47141535 | 47144549 | 7.06  |
| chr10 | 49495610 | 49496802 | 3.7   |
| chr10 | 50751400 | 50753757 | 4.71  |
| chr10 | 50894297 | 50895448 | 4.37  |
| chr10 | 54263688 | 54265098 | 5.05  |
| chr10 | 54265852 | 54269552 | 10.76 |
| chr10 | 54270605 | 54272509 | 5.38  |
| chr10 | 54341010 | 54342360 | 5.72  |
| chr10 | 55154965 | 55155995 | 4.37  |
| chr10 | 55898929 | 55900648 | 13.12 |
| chr10 | 57850108 | 57851464 | 7.74  |
| chr10 | 58129345 | 58131657 | 10.43 |
| chr10 | 58530866 | 58531743 | 4.37  |
| chr10 | 58582431 | 58583164 | 6.05  |
| chr10 | 58977571 | 58978450 | 3.7   |
| chr10 | 59101814 | 59103725 | 7.4   |
| chr10 | 59535938 | 59537184 | 5.38  |
| chr10 | 61681701 | 61683485 | 5.05  |
| chr10 | 62992187 | 62993111 | 5.05  |
| chr10 | 63057398 | 63058499 | 3.36  |
| chr10 | 63183106 | 63184089 | 3.7   |
| chr10 | 63510294 | 63511258 | 3.7   |

|       |          |          |       |
|-------|----------|----------|-------|
| chr10 | 63683134 | 63684058 | 3.7   |
| chr10 | 64091833 | 64092770 | 4.04  |
| chr10 | 64100294 | 64104646 | 12.11 |
| chr10 | 64224141 | 64226075 | 4.71  |
| chr10 | 65471419 | 65472610 | 4.37  |
| chr10 | 65748594 | 65749474 | 4.37  |
| chr10 | 66793977 | 66795079 | 3.36  |
| chr10 | 67039834 | 67040924 | 3.36  |
| chr10 | 67340516 | 67342158 | 8.41  |
| chr10 | 67374383 | 67375422 | 3.03  |
| chr10 | 67423678 | 67424946 | 5.05  |
| chr10 | 69236885 | 69237947 | 3.36  |
| chr10 | 69351207 | 69352334 | 4.04  |
| chr10 | 70620259 | 70621936 | 4.37  |
| chr10 | 70660860 | 70661614 | 3.03  |
| chr10 | 70789277 | 70790230 | 3.36  |
| chr10 | 71198326 | 71199794 | 3.36  |
| chr10 | 71308800 | 71310803 | 10.76 |
| chr10 | 72407482 | 72409311 | 7.4   |
| chr10 | 72409518 | 72412430 | 6.73  |
| chr10 | 72874294 | 72877259 | 14.46 |
| chr10 | 73099400 | 73100467 | 4.37  |
| chr10 | 73675979 | 73677644 | 11.44 |
| chr10 | 73703745 | 73707397 | 13.45 |
| chr10 | 74090677 | 74092150 | 4.71  |
| chr10 | 74114186 | 74115321 | 4.37  |
| chr10 | 74301026 | 74301939 | 3.36  |
| chr10 | 74736663 | 74737536 | 3.7   |
| chr10 | 75076418 | 75078030 | 6.05  |
| chr10 | 75648206 | 75649025 | 4.04  |
| chr10 | 75758150 | 75759329 | 4.37  |
| chr10 | 76270606 | 76271561 | 4.71  |
| chr10 | 76477640 | 76478543 | 4.37  |
| chr10 | 76534086 | 76535779 | 5.72  |
| chr10 | 76576207 | 76577576 | 4.71  |
| chr10 | 76659760 | 76660728 | 3.36  |
| chr10 | 77331902 | 77333182 | 4.71  |
| chr10 | 77814768 | 77817251 | 4.37  |
| chr10 | 78019514 | 78020703 | 3.7   |
| chr10 | 79616535 | 79617437 | 3.7   |
| chr10 | 79708776 | 79709809 | 4.04  |
| chr10 | 79710447 | 79712073 | 5.38  |
| chr10 | 80732323 | 80733277 | 2.35  |

|       |          |          |      |
|-------|----------|----------|------|
| chr10 | 80828754 | 80830124 | 4.71 |
| chr10 | 81827592 | 81828636 | 4.04 |
| chr10 | 82056447 | 82057411 | 3.36 |
| chr10 | 82057959 | 82059382 | 4.04 |
| chr10 | 82414376 | 82416585 | 4.37 |
| chr10 | 82588793 | 82589959 | 4.71 |
| chr10 | 82593196 | 82594540 | 3.7  |
| chr10 | 82937051 | 82938182 | 5.38 |
| chr10 | 82992187 | 82993570 | 5.38 |
| chr10 | 82998252 | 82999296 | 3.36 |
| chr10 | 83349886 | 83351143 | 6.39 |
| chr10 | 83428964 | 83429825 | 3.7  |
| chr10 | 84870243 | 84870953 | 4.04 |
| chr10 | 85351725 | 85353092 | 5.38 |
| chr10 | 85493432 | 85494755 | 3.7  |
| chr10 | 85885615 | 85887676 | 4.04 |
| chr10 | 86786239 | 86787379 | 4.37 |
| chr10 | 88160260 | 88161082 | 3.36 |
| chr10 | 88516534 | 88517887 | 3.7  |
| chr10 | 88712238 | 88713052 | 4.37 |
| chr10 | 89264576 | 89265355 | 3.7  |
| chr10 | 89322078 | 89323138 | 3.36 |
| chr10 | 89559171 | 89563355 | 5.38 |
| chr10 | 89621016 | 89622852 | 4.71 |
| chr10 | 89672520 | 89674379 | 5.38 |
| chr10 | 90155293 | 90156188 | 5.72 |
| chr10 | 91379648 | 91380921 | 4.37 |
| chr10 | 91895630 | 91898494 | 11.1 |
| chr10 | 92609760 | 92610732 | 3.7  |
| chr10 | 92856653 | 92857687 | 4.04 |
| chr10 | 93133404 | 93134571 | 4.04 |
| chr10 | 93212794 | 93213908 | 3.7  |
| chr10 | 93315973 | 93317211 | 3.36 |
| chr10 | 93668204 | 93669332 | 4.71 |
| chr10 | 94422135 | 94423495 | 7.06 |
| chr10 | 94617046 | 94618660 | 9.75 |
| chr10 | 94651663 | 94652882 | 4.04 |
| chr10 | 95194548 | 95195511 | 4.04 |
| chr10 | 95225749 | 95226867 | 5.05 |
| chr10 | 95461948 | 95463015 | 5.38 |
| chr10 | 95769115 | 95770621 | 4.04 |
| chr10 | 95788732 | 95791324 | 7.4  |
| chr10 | 96702565 | 96704309 | 4.71 |

|       |           |           |       |
|-------|-----------|-----------|-------|
| chr10 | 97802846  | 97803716  | 3.03  |
| chr10 | 97849349  | 97850392  | 3.36  |
| chr10 | 97936642  | 97937581  | 3.36  |
| chr10 | 99908736  | 99909680  | 3.36  |
| chr10 | 101008603 | 101009400 | 3.36  |
| chr10 | 101787064 | 101788854 | 5.05  |
| chr10 | 102241211 | 102241989 | 3.7   |
| chr10 | 102756911 | 102758423 | 3.7   |
| chr10 | 102827040 | 102828118 | 5.05  |
| chr10 | 103085648 | 103086592 | 3.7   |
| chr10 | 103945930 | 103952728 | 7.06  |
| chr10 | 103963358 | 103964830 | 6.05  |
| chr10 | 104180175 | 104181864 | 5.72  |
| chr10 | 104383515 | 104384767 | 4.37  |
| chr10 | 104598101 | 104598850 | 3.36  |
| chr10 | 105000873 | 105001865 | 3.7   |
| chr10 | 105210646 | 105211834 | 4.71  |
| chr10 | 105512131 | 105513042 | 3.7   |
| chr10 | 105911238 | 105912290 | 3.7   |
| chr10 | 105993193 | 105995734 | 7.4   |
| chr10 | 106064548 | 106065342 | 4.71  |
| chr10 | 106130528 | 106131419 | 3.03  |
| chr10 | 108137837 | 108138653 | 4.04  |
| chr10 | 109263132 | 109264918 | 10.09 |
| chr10 | 109324364 | 109325670 | 4.37  |
| chr10 | 109370271 | 109371076 | 3.36  |
| chr10 | 109423314 | 109424762 | 3.7   |
| chr10 | 110007767 | 110008997 | 4.71  |
| chr10 | 110544149 | 110545158 | 4.37  |
| chr10 | 111393250 | 111394541 | 5.05  |
| chr10 | 111409594 | 111410694 | 4.71  |
| chr10 | 111423138 | 111424235 | 3.7   |
| chr10 | 112176580 | 112177592 | 3.7   |
| chr10 | 113248289 | 113249282 | 4.37  |
| chr10 | 114606614 | 114608388 | 5.38  |
| chr10 | 114623759 | 114624798 | 4.71  |
| chr10 | 115238919 | 115240681 | 7.4   |
| chr10 | 115452527 | 115453758 | 4.37  |
| chr10 | 115928030 | 115929096 | 4.71  |
| chr10 | 115954133 | 115954803 | 2.02  |
| chr10 | 116186723 | 116187700 | 1.68  |
| chr10 | 116864133 | 116865991 | 4.71  |
| chr10 | 117216251 | 117217563 | 5.38  |

|       |           |           |       |
|-------|-----------|-----------|-------|
| chr10 | 117260476 | 117265382 | 11.1  |
| chr10 | 117350647 | 117351779 | 4.04  |
| chr10 | 117374291 | 117380324 | 4.04  |
| chr10 | 117458758 | 117462424 | 4.37  |
| chr10 | 117474732 | 117475778 | 3.7   |
| chr10 | 117992776 | 117993574 | 3.7   |
| chr10 | 118763881 | 118765210 | 4.71  |
| chr10 | 118790793 | 118791891 | 3.7   |
| chr10 | 120367792 | 120369206 | 4.71  |
| chr10 | 121403970 | 121405443 | 8.75  |
| chr10 | 121423141 | 121424329 | 4.37  |
| chr10 | 121726144 | 121727499 | 6.73  |
| chr10 | 122747854 | 122749586 | 8.41  |
| chr10 | 122764748 | 122766370 | 4.04  |
| chr10 | 123268916 | 123270068 | 4.04  |
| chr10 | 123312982 | 123313889 | 4.04  |
| chr10 | 123734444 | 123735921 | 3.36  |
| chr10 | 125503001 | 125503864 | 4.37  |
| chr10 | 125851819 | 125852581 | 3.36  |
| chr10 | 126926354 | 126928163 | 7.06  |
| chr10 | 127011719 | 127012760 | 3.7   |
| chr10 | 127364505 | 127365833 | 4.04  |
| chr10 | 127641752 | 127643315 | 6.73  |
| chr10 | 127892455 | 127893141 | 4.04  |
| chr10 | 131280937 | 131283282 | 9.42  |
| chr10 | 131288926 | 131290914 | 9.42  |
| chr10 | 131384515 | 131386088 | 8.07  |
| chr10 | 131908503 | 131909942 | 3.7   |
| chr10 | 132079612 | 132083497 | 10.09 |
| chr10 | 132095163 | 132095933 | 3.7   |
| chr10 | 133608838 | 133610549 | 6.39  |
| chr10 | 133860503 | 133861335 | 4.04  |
| chr10 | 133864764 | 133867397 | 12.11 |
| chr10 | 134029803 | 134030736 | 4.04  |
| chr10 | 134220872 | 134222281 | 4.04  |
| chr10 | 134261111 | 134262032 | 3.36  |
| chr10 | 135336807 | 135338117 | 4.71  |
| chr10 | 135420741 | 135422093 | 5.05  |
| chr17 | 277789    | 278853    | 4.71  |
| chr17 | 4161905   | 4162764   | 4.37  |
| chr17 | 4981020   | 4981844   | 3.7   |
| chr17 | 4988859   | 4991461   | 4.37  |
| chr17 | 4992861   | 4993733   | 3.7   |

|       |          |          |       |
|-------|----------|----------|-------|
| chr17 | 4994225  | 5001365  | 13.12 |
| chr17 | 5002577  | 5003365  | 3.36  |
| chr17 | 5004377  | 5005279  | 4.37  |
| chr17 | 5008531  | 5010315  | 5.38  |
| chr17 | 5080953  | 5082052  | 4.37  |
| chr17 | 5082942  | 5088602  | 13.45 |
| chr17 | 5554237  | 5555370  | 4.71  |
| chr17 | 5712404  | 5713885  | 5.72  |
| chr17 | 6333847  | 6334583  | 2.69  |
| chr17 | 7431471  | 7433079  | 6.05  |
| chr17 | 7440401  | 7442305  | 5.38  |
| chr17 | 7877675  | 7878926  | 5.38  |
| chr17 | 8830744  | 8832916  | 5.05  |
| chr17 | 9118515  | 9119465  | 3.36  |
| chr17 | 9582842  | 9584004  | 4.37  |
| chr17 | 9639180  | 9640620  | 7.06  |
| chr17 | 9786155  | 9787687  | 6.39  |
| chr17 | 10096447 | 10097776 | 4.71  |
| chr17 | 10108764 | 10109641 | 3.03  |
| chr17 | 10392774 | 10393531 | 1.68  |
| chr17 | 10675306 | 10676415 | 3.7   |
| chr17 | 12231026 | 12232230 | 5.05  |
| chr17 | 12734596 | 12736288 | 8.41  |
| chr17 | 12970991 | 12971867 | 4.04  |
| chr17 | 13074656 | 13076182 | 6.73  |
| chr17 | 13383606 | 13384772 | 3.7   |
| chr17 | 13672602 | 13673720 | 4.37  |
| chr17 | 14788969 | 14790299 | 4.37  |
| chr17 | 15019146 | 15020471 | 4.37  |
| chr17 | 15103113 | 15104529 | 3.7   |
| chr17 | 15619614 | 15621356 | 7.74  |
| chr17 | 15681927 | 15682937 | 4.71  |
| chr17 | 16074459 | 16075545 | 3.7   |
| chr17 | 16180008 | 16181324 | 5.72  |
| chr17 | 16452092 | 16458398 | 8.41  |
| chr17 | 16492171 | 16493299 | 4.71  |
| chr17 | 16513768 | 16514760 | 3.7   |
| chr17 | 16521371 | 16528600 | 12.11 |
| chr17 | 16530207 | 16531244 | 4.04  |
| chr17 | 17327040 | 17329057 | 8.75  |
| chr17 | 17585572 | 17586329 | 3.36  |
| chr17 | 17990479 | 17991856 | 5.72  |
| chr17 | 18564552 | 18566079 | 9.42  |



|       |          |          |       |
|-------|----------|----------|-------|
| chr17 | 19345946 | 19347025 | 4.71  |
| chr17 | 19699381 | 19700646 | 5.05  |
| chr17 | 20097612 | 20100248 | 5.38  |
| chr17 | 21037337 | 21038670 | 6.39  |
| chr17 | 21040238 | 21042112 | 6.39  |
| chr17 | 21211965 | 21212858 | 4.04  |
| chr17 | 21230913 | 21233251 | 5.38  |
| chr17 | 21236890 | 21238030 | 3.7   |
| chr17 | 21307015 | 21307823 | 2.35  |
| chr17 | 21550055 | 21550855 | 2.69  |
| chr17 | 21773522 | 21774800 | 4.04  |
| chr17 | 21778721 | 21780946 | 4.71  |
| chr17 | 21903861 | 21905076 | 4.37  |
| chr17 | 22191957 | 22192989 | 3.36  |
| chr17 | 22241475 | 22242978 | 4.04  |
| chr17 | 22250859 | 22253416 | 18.16 |
| chr17 | 22254897 | 22255852 | 11.1  |
| chr17 | 22258828 | 22260420 | 9.08  |
| chr17 | 22260738 | 22262360 | 15.14 |
| chr17 | 25263267 | 25268372 | 6.39  |
| chr17 | 25310281 | 25311209 | 3.03  |
| chr17 | 25494194 | 25495248 | 4.71  |
| chr17 | 25505755 | 25509304 | 5.38  |
| chr17 | 25516331 | 25517411 | 5.38  |
| chr17 | 25518859 | 25523644 | 4.37  |
| chr17 | 25568157 | 25569217 | 4.37  |
| chr17 | 25574092 | 25575164 | 5.05  |
| chr17 | 25659154 | 25660161 | 4.37  |
| chr17 | 26021006 | 26023248 | 13.79 |
| chr17 | 26028709 | 26029813 | 4.04  |
| chr17 | 26038709 | 26040184 | 4.04  |
| chr17 | 26199954 | 26201457 | 4.04  |
| chr17 | 26537403 | 26538601 | 4.71  |
| chr17 | 26588564 | 26590898 | 7.4   |
| chr17 | 27069979 | 27070747 | 3.7   |
| chr17 | 27224207 | 27225064 | 3.36  |
| chr17 | 27443748 | 27444487 | 1.68  |
| chr17 | 34452520 | 34453765 | 6.05  |
| chr17 | 37202791 | 37203860 | 4.71  |
| chr17 | 38916545 | 38917302 | 2.69  |
| chr17 | 41381186 | 41382794 | 11.44 |
| chr17 | 41396841 | 41397962 | 5.38  |
| chr17 | 41399546 | 41401814 | 35.32 |

|       |          |          |       |
|-------|----------|----------|-------|
| chr17 | 41425231 | 41426601 | 5.05  |
| chr17 | 41457163 | 41458598 | 7.06  |
| chr17 | 41465475 | 41466826 | 10.76 |
| chr17 | 44999902 | 45000947 | 4.37  |
| chr17 | 45144387 | 45145616 | 5.05  |
| chr17 | 45314132 | 45315410 | 5.05  |
| chr17 | 45726500 | 45727450 | 4.04  |
| chr17 | 45747172 | 45748340 | 3.7   |
| chr17 | 45749731 | 45752299 | 4.37  |
| chr17 | 45753516 | 45754807 | 4.37  |
| chr17 | 45757123 | 45758274 | 5.05  |
| chr17 | 45764446 | 45765334 | 4.04  |
| chr17 | 45770449 | 45771221 | 3.7   |
| chr17 | 45775397 | 45776259 | 4.04  |
| chr17 | 45783407 | 45784257 | 4.04  |
| chr17 | 45785070 | 45786025 | 3.36  |
| chr17 | 45787623 | 45790775 | 4.71  |
| chr17 | 45797838 | 45799351 | 3.7   |
| chr17 | 45801556 | 45802461 | 3.36  |
| chr17 | 45831077 | 45832221 | 4.71  |
| chr17 | 45832756 | 45839554 | 14.46 |
| chr17 | 45845539 | 45849304 | 5.05  |
| chr17 | 45852931 | 45853750 | 3.36  |
| chr17 | 45862569 | 45863851 | 4.71  |
| chr17 | 45898511 | 45899975 | 5.38  |
| chr17 | 45907523 | 45908952 | 3.7   |
| chr17 | 45917182 | 45918118 | 4.04  |
| chr17 | 45920276 | 45921504 | 4.37  |
| chr17 | 45927459 | 45929114 | 5.05  |
| chr17 | 45940022 | 45941067 | 4.71  |
| chr17 | 45960539 | 45963613 | 5.05  |
| chr17 | 45971369 | 45973076 | 3.03  |
| chr17 | 45973522 | 45974832 | 5.05  |
| chr17 | 45981685 | 45983255 | 3.7   |
| chr17 | 46017184 | 46019736 | 5.05  |
| chr17 | 46023842 | 46024964 | 3.7   |
| chr17 | 46025635 | 46026958 | 5.05  |
| chr17 | 46032448 | 46033409 | 4.37  |
| chr17 | 46033712 | 46040010 | 5.38  |
| chr17 | 46047576 | 46049055 | 5.05  |
| chr17 | 46057989 | 46058844 | 3.7   |
| chr17 | 46059952 | 46061223 | 5.72  |
| chr17 | 46064216 | 46065608 | 4.04  |

|       |          |          |      |
|-------|----------|----------|------|
| chr17 | 46091135 | 46092600 | 3.7  |
| chr17 | 46100180 | 46104411 | 5.38 |
| chr17 | 46109207 | 46111404 | 4.37 |
| chr17 | 46114180 | 46115507 | 5.05 |
| chr17 | 46123908 | 46126939 | 5.72 |
| chr17 | 46127775 | 46129892 | 4.04 |
| chr17 | 46130587 | 46132126 | 3.7  |
| chr17 | 46150835 | 46152094 | 4.71 |
| chr17 | 46177982 | 46179305 | 4.71 |
| chr17 | 46184098 | 46185709 | 4.37 |
| chr17 | 46227092 | 46228163 | 3.7  |
| chr17 | 46228619 | 46229606 | 3.03 |
| chr17 | 46236225 | 46238789 | 5.05 |
| chr17 | 46360536 | 46361810 | 4.71 |
| chr17 | 46438612 | 46439865 | 5.38 |
| chr17 | 46473219 | 46474386 | 4.04 |
| chr17 | 46518183 | 46519208 | 4.04 |
| chr17 | 46533757 | 46535253 | 4.04 |
| chr17 | 46569593 | 46570849 | 4.04 |
| chr17 | 46576690 | 46578122 | 3.7  |
| chr17 | 46600050 | 46601878 | 4.04 |
| chr17 | 46605277 | 46606373 | 4.37 |
| chr17 | 46907887 | 46909252 | 4.71 |
| chr17 | 46925312 | 46926416 | 3.7  |
| chr17 | 46940089 | 46941110 | 4.04 |
| chr17 | 46968445 | 46969441 | 3.36 |
| chr17 | 46984961 | 46986495 | 4.37 |
| chr17 | 47031141 | 47031973 | 3.7  |
| chr17 | 47049475 | 47050556 | 4.04 |
| chr17 | 47078653 | 47079858 | 5.05 |
| chr17 | 47091400 | 47093336 | 4.37 |
| chr17 | 47109281 | 47110373 | 3.7  |
| chr17 | 47138396 | 47139541 | 3.7  |
| chr17 | 47159462 | 47160279 | 3.36 |
| chr17 | 47167615 | 47169547 | 4.71 |
| chr17 | 47169924 | 47171215 | 5.72 |
| chr17 | 47178014 | 47179988 | 7.4  |
| chr17 | 47183627 | 47185018 | 4.71 |
| chr17 | 47198404 | 47199852 | 4.71 |
| chr17 | 47206246 | 47207432 | 4.71 |
| chr17 | 47209425 | 47210807 | 4.04 |
| chr17 | 47245105 | 47247865 | 4.71 |
| chr17 | 47251743 | 47254603 | 7.4  |

|       |          |          |      |
|-------|----------|----------|------|
| chr17 | 47260687 | 47262272 | 4.37 |
| chr17 | 47268914 | 47271308 | 4.71 |
| chr17 | 47304338 | 47305179 | 4.37 |
| chr17 | 47437698 | 47440386 | 4.71 |
| chr17 | 47455468 | 47456588 | 3.36 |
| chr17 | 47457297 | 47459073 | 4.71 |
| chr17 | 47467065 | 47467929 | 6.05 |
| chr17 | 47485043 | 47486135 | 4.04 |
| chr17 | 47499524 | 47500830 | 7.06 |
| chr17 | 47517330 | 47518153 | 3.03 |
| chr17 | 47571548 | 47573094 | 3.7  |
| chr17 | 47585201 | 47587986 | 4.04 |
| chr17 | 47590733 | 47591740 | 3.36 |
| chr17 | 47592114 | 47593453 | 3.7  |
| chr17 | 47601107 | 47602210 | 3.36 |
| chr17 | 47633166 | 47634023 | 5.05 |
| chr17 | 47643712 | 47644804 | 3.7  |
| chr17 | 47647369 | 47648907 | 4.04 |
| chr17 | 47652413 | 47654800 | 4.71 |
| chr17 | 47656996 | 47658501 | 5.05 |
| chr17 | 47662565 | 47663651 | 4.37 |
| chr17 | 47706851 | 47708326 | 5.38 |
| chr17 | 47754150 | 47756359 | 5.05 |
| chr17 | 47784649 | 47786546 | 5.05 |
| chr17 | 47787190 | 47788787 | 3.36 |
| chr17 | 47841579 | 47842702 | 3.7  |
| chr17 | 47843902 | 47844816 | 3.7  |
| chr17 | 47964357 | 47965492 | 5.05 |
| chr17 | 48045365 | 48046562 | 3.03 |
| chr17 | 48053539 | 48054302 | 3.36 |
| chr17 | 48091383 | 48092815 | 6.73 |
| chr17 | 48171524 | 48172479 | 3.36 |
| chr17 | 48226215 | 48227129 | 3.36 |
| chr17 | 48227981 | 48229483 | 5.05 |
| chr17 | 48302432 | 48303806 | 8.41 |
| chr17 | 48394386 | 48395103 | 4.04 |
| chr17 | 48555400 | 48556686 | 5.05 |
| chr17 | 48638087 | 48639121 | 2.02 |
| chr17 | 48737511 | 48739898 | 4.37 |
| chr17 | 48784578 | 48785973 | 5.05 |
| chr17 | 48940690 | 48945014 | 4.71 |
| chr17 | 48968776 | 48970337 | 5.38 |
| chr17 | 48975920 | 48976743 | 4.71 |

|       |          |          |      |
|-------|----------|----------|------|
| chr17 | 48977231 | 48979561 | 4.04 |
| chr17 | 48980983 | 48983325 | 5.72 |
| chr17 | 48992157 | 48994407 | 3.7  |
| chr17 | 48996438 | 48998062 | 4.37 |
| chr17 | 48999203 | 49001822 | 3.7  |
| chr17 | 49012222 | 49013642 | 5.05 |
| chr17 | 49016260 | 49017574 | 4.37 |
| chr17 | 49020991 | 49022560 | 3.7  |
| chr17 | 49023203 | 49023965 | 3.36 |
| chr17 | 49024287 | 49026502 | 5.05 |
| chr17 | 49026794 | 49028076 | 3.7  |
| chr17 | 49033791 | 49035088 | 5.05 |
| chr17 | 49162290 | 49163292 | 3.36 |
| chr17 | 49196054 | 49199598 | 4.71 |
| chr17 | 49230114 | 49231718 | 9.42 |
| chr17 | 49261637 | 49262511 | 3.7  |
| chr17 | 49327823 | 49328666 | 4.04 |
| chr17 | 49336645 | 49339136 | 5.38 |
| chr17 | 49373963 | 49375341 | 4.37 |
| chr17 | 49393210 | 49395660 | 7.06 |
| chr17 | 49395900 | 49397061 | 4.37 |
| chr17 | 49448768 | 49450611 | 4.04 |
| chr17 | 49475627 | 49477094 | 3.7  |
| chr17 | 49492733 | 49493701 | 3.36 |
| chr17 | 49512687 | 49514062 | 3.7  |
| chr17 | 49516303 | 49517784 | 4.04 |
| chr17 | 49557528 | 49559925 | 5.05 |
| chr17 | 49571009 | 49572205 | 4.04 |
| chr17 | 49661941 | 49663803 | 4.37 |
| chr17 | 49684504 | 49686493 | 4.04 |
| chr17 | 49787077 | 49788005 | 3.36 |
| chr17 | 49856906 | 49857832 | 3.36 |
| chr17 | 50038540 | 50039553 | 3.03 |
| chr17 | 50343254 | 50344318 | 5.38 |
| chr17 | 50435188 | 50436246 | 4.37 |
| chr17 | 50635952 | 50636761 | 3.03 |
| chr17 | 50697800 | 50698836 | 4.04 |
| chr17 | 50707439 | 50708380 | 4.04 |
| chr17 | 51015442 | 51016816 | 6.73 |
| chr17 | 51916727 | 51918464 | 7.74 |
| chr17 | 52204008 | 52205023 | 3.36 |
| chr17 | 52399796 | 52400787 | 3.7  |
| chr17 | 52465765 | 52466735 | 3.7  |

|       |          |          |      |
|-------|----------|----------|------|
| chr17 | 52532059 | 52534404 | 6.39 |
| chr17 | 52657562 | 52659690 | 5.05 |
| chr17 | 52683867 | 52684688 | 3.03 |
| chr17 | 52804854 | 52806306 | 3.36 |
| chr17 | 52822769 | 52824282 | 5.38 |
| chr17 | 52913292 | 52914822 | 5.38 |
| chr17 | 52977683 | 52978914 | 5.05 |
| chr17 | 53057259 | 53058591 | 5.38 |
| chr17 | 53294363 | 53295262 | 2.35 |
| chr17 | 53509952 | 53511545 | 3.7  |
| chr17 | 53638715 | 53639747 | 1.68 |
| chr17 | 53665807 | 53666835 | 3.7  |
| chr17 | 53827738 | 53829985 | 5.05 |
| chr17 | 53892959 | 53893879 | 3.36 |
| chr17 | 54015554 | 54016576 | 3.7  |
| chr17 | 54042501 | 54043711 | 3.36 |
| chr17 | 54275010 | 54276448 | 3.03 |
| chr17 | 54314968 | 54316110 | 4.71 |
| chr17 | 54512040 | 54513058 | 4.04 |
| chr17 | 54548255 | 54549155 | 2.02 |
| chr17 | 54564615 | 54565824 | 3.7  |
| chr17 | 54629722 | 54632575 | 5.05 |
| chr17 | 54638305 | 54639474 | 4.37 |
| chr17 | 54646368 | 54647136 | 4.04 |
| chr17 | 54670550 | 54672610 | 4.71 |
| chr17 | 54706640 | 54707958 | 4.37 |
| chr17 | 54719918 | 54720796 | 2.69 |
| chr17 | 54729432 | 54730912 | 3.7  |
| chr17 | 54756649 | 54757869 | 4.71 |
| chr17 | 54775667 | 54777578 | 4.37 |
| chr17 | 54780039 | 54781543 | 3.36 |
| chr17 | 54825161 | 54826630 | 3.7  |
| chr17 | 54828563 | 54829534 | 4.04 |
| chr17 | 54839476 | 54841066 | 4.04 |
| chr17 | 54842340 | 54843804 | 4.71 |
| chr17 | 54857122 | 54858418 | 4.04 |
| chr17 | 54888774 | 54889614 | 2.35 |
| chr17 | 54909285 | 54910054 | 3.03 |
| chr17 | 54910934 | 54913206 | 5.05 |
| chr17 | 54964698 | 54966354 | 6.05 |
| chr17 | 54967214 | 54968612 | 3.03 |
| chr17 | 54989613 | 54993176 | 6.05 |
| chr17 | 54994121 | 54996461 | 5.05 |

|       |          |          |       |
|-------|----------|----------|-------|
| chr17 | 55003476 | 55010073 | 19.84 |
| chr17 | 55014569 | 55015533 | 4.04  |
| chr17 | 55036589 | 55037444 | 3.36  |
| chr17 | 55037794 | 55039137 | 4.37  |
| chr17 | 55046485 | 55051670 | 10.43 |
| chr17 | 55053056 | 55053921 | 4.37  |
| chr17 | 55086129 | 55087837 | 4.04  |
| chr17 | 55093541 | 55094440 | 3.36  |
| chr17 | 55095032 | 55096259 | 4.04  |
| chr17 | 55098492 | 55108131 | 22.2  |
| chr17 | 55108681 | 55110162 | 4.04  |
| chr17 | 55120300 | 55121224 | 3.7   |
| chr17 | 55142282 | 55143303 | 3.7   |
| chr17 | 55145018 | 55146009 | 4.04  |
| chr17 | 55161688 | 55165828 | 4.71  |
| chr17 | 55187774 | 55189110 | 3.03  |
| chr17 | 55198594 | 55199567 | 3.7   |
| chr17 | 55201964 | 55202961 | 3.36  |
| chr17 | 55225420 | 55227562 | 4.71  |
| chr17 | 55228494 | 55233016 | 5.05  |
| chr17 | 55234900 | 55237325 | 4.71  |
| chr17 | 55237786 | 55241473 | 4.37  |
| chr17 | 55243565 | 55245021 | 4.71  |
| chr17 | 55269504 | 55270381 | 3.36  |
| chr17 | 55283292 | 55293511 | 5.72  |
| chr17 | 55294374 | 55297196 | 5.72  |
| chr17 | 55298037 | 55300276 | 7.06  |
| chr17 | 55303750 | 55305711 | 4.04  |
| chr17 | 55311327 | 55312754 | 3.36  |
| chr17 | 55318453 | 55321997 | 4.37  |
| chr17 | 55322866 | 55324125 | 4.04  |
| chr17 | 55324352 | 55325978 | 3.36  |
| chr17 | 55326496 | 55327518 | 5.05  |
| chr17 | 55328433 | 55329688 | 3.7   |
| chr17 | 55331706 | 55336020 | 4.71  |
| chr17 | 55336416 | 55339801 | 4.71  |
| chr17 | 55342584 | 55343753 | 3.36  |
| chr17 | 55351982 | 55352926 | 3.03  |
| chr17 | 55375466 | 55377029 | 4.37  |
| chr17 | 55388868 | 55390192 | 4.37  |
| chr17 | 55392331 | 55395414 | 3.7   |
| chr17 | 55403102 | 55404230 | 4.04  |
| chr17 | 55412093 | 55413715 | 5.38  |

|       |          |          |      |
|-------|----------|----------|------|
| chr17 | 55417306 | 55420099 | 4.71 |
| chr17 | 55427641 | 55428944 | 4.04 |
| chr17 | 55429715 | 55431039 | 4.37 |
| chr17 | 55432317 | 55436452 | 5.38 |
| chr17 | 55441274 | 55442270 | 3.36 |
| chr17 | 55444184 | 55445477 | 4.37 |
| chr17 | 55447252 | 55448688 | 4.37 |
| chr17 | 55449656 | 55452989 | 6.39 |
| chr17 | 55463820 | 55466063 | 5.72 |
| chr17 | 55467872 | 55469424 | 3.7  |
| chr17 | 55470036 | 55472597 | 7.4  |
| chr17 | 55484513 | 55486463 | 4.71 |
| chr17 | 55487302 | 55488479 | 4.04 |
| chr17 | 55493799 | 55494976 | 3.7  |
| chr17 | 55517168 | 55519009 | 4.04 |
| chr17 | 55524762 | 55526899 | 6.05 |
| chr17 | 55535863 | 55537200 | 4.71 |
| chr17 | 55539209 | 55540544 | 4.37 |
| chr17 | 55542583 | 55545180 | 4.71 |
| chr17 | 55546651 | 55547682 | 3.7  |
| chr17 | 55548981 | 55550162 | 3.03 |
| chr17 | 55552634 | 55553390 | 3.36 |
| chr17 | 55557799 | 55559013 | 3.7  |
| chr17 | 55582268 | 55583763 | 3.7  |
| chr17 | 55590495 | 55592066 | 3.7  |
| chr17 | 55594628 | 55596405 | 4.04 |
| chr17 | 55601329 | 55602154 | 3.7  |
| chr17 | 55612325 | 55613282 | 3.7  |
| chr17 | 55620264 | 55621360 | 4.04 |
| chr17 | 55627232 | 55628772 | 4.71 |
| chr17 | 55642247 | 55643671 | 3.7  |
| chr17 | 55650432 | 55651371 | 4.04 |
| chr17 | 55659364 | 55660734 | 4.71 |
| chr17 | 55664448 | 55665945 | 5.05 |
| chr17 | 55672994 | 55676124 | 4.04 |
| chr17 | 55680072 | 55682210 | 3.7  |
| chr17 | 55682846 | 55684477 | 3.7  |
| chr17 | 55685739 | 55687350 | 4.04 |
| chr17 | 55689751 | 55690652 | 3.36 |
| chr17 | 55693262 | 55695206 | 4.37 |
| chr17 | 55703555 | 55704709 | 3.36 |
| chr17 | 55713299 | 55714233 | 4.04 |
| chr17 | 55746090 | 55747189 | 4.37 |



|       |          |          |      |
|-------|----------|----------|------|
| chr17 | 55790364 | 55791831 | 3.36 |
| chr17 | 55792586 | 55793797 | 4.04 |
| chr17 | 55795792 | 55797192 | 4.71 |
| chr17 | 55802936 | 55804835 | 4.04 |
| chr17 | 55816041 | 55817602 | 3.36 |
| chr17 | 55821119 | 55822067 | 4.04 |
| chr17 | 55822738 | 55823913 | 4.04 |
| chr17 | 55827708 | 55829081 | 5.38 |
| chr17 | 55830093 | 55833268 | 4.04 |
| chr17 | 55842135 | 55845184 | 5.72 |
| chr17 | 55850266 | 55851559 | 4.04 |
| chr17 | 55863536 | 55865039 | 3.7  |
| chr17 | 55866942 | 55867789 | 3.7  |
| chr17 | 55875493 | 55876372 | 3.7  |
| chr17 | 55877914 | 55879880 | 4.71 |
| chr17 | 55896385 | 55897897 | 4.04 |
| chr17 | 55910042 | 55912734 | 4.04 |
| chr17 | 55925915 | 55928823 | 6.73 |
| chr17 | 55929061 | 55930393 | 4.04 |
| chr17 | 55932502 | 55933241 | 3.7  |
| chr17 | 55935022 | 55936015 | 4.71 |
| chr17 | 55937466 | 55940149 | 4.71 |
| chr17 | 55944054 | 55946074 | 3.36 |
| chr17 | 55950484 | 55951686 | 4.71 |
| chr17 | 55959179 | 55960000 | 4.04 |
| chr17 | 55968204 | 55971277 | 7.06 |
| chr17 | 55975708 | 55979497 | 5.72 |
| chr17 | 55979936 | 55981639 | 4.37 |
| chr17 | 55982316 | 55983770 | 4.71 |
| chr17 | 55987384 | 55989935 | 3.7  |
| chr17 | 55990686 | 55992941 | 4.04 |
| chr17 | 55994005 | 55996488 | 7.4  |
| chr17 | 55996898 | 55998392 | 4.04 |
| chr17 | 55999324 | 56000322 | 3.7  |
| chr17 | 56001775 | 56003459 | 4.37 |
| chr17 | 56004165 | 56005540 | 4.71 |
| chr17 | 56006162 | 56007270 | 4.04 |
| chr17 | 56007551 | 56008549 | 4.37 |
| chr17 | 56017321 | 56019112 | 3.7  |
| chr17 | 56021731 | 56023016 | 4.37 |
| chr17 | 56023558 | 56026928 | 4.71 |
| chr17 | 56030378 | 56035301 | 4.71 |
| chr17 | 56048098 | 56049741 | 3.7  |

|       |          |          |      |
|-------|----------|----------|------|
| chr17 | 56052023 | 56053086 | 4.04 |
| chr17 | 56055281 | 56056445 | 3.7  |
| chr17 | 56060687 | 56061502 | 3.03 |
| chr17 | 56061940 | 56066656 | 5.72 |
| chr17 | 56067962 | 56068845 | 4.71 |
| chr17 | 56072319 | 56073444 | 4.37 |
| chr17 | 56075725 | 56077853 | 4.71 |
| chr17 | 56079218 | 56086726 | 7.74 |
| chr17 | 56097990 | 56099207 | 3.7  |
| chr17 | 56099716 | 56101192 | 5.72 |
| chr17 | 56119038 | 56119861 | 3.7  |
| chr17 | 56120914 | 56122568 | 3.36 |
| chr17 | 56123374 | 56124739 | 3.7  |
| chr17 | 56128277 | 56129344 | 3.36 |
| chr17 | 56132418 | 56133325 | 4.37 |
| chr17 | 56137445 | 56138730 | 4.04 |
| chr17 | 56141222 | 56142331 | 3.36 |
| chr17 | 56152404 | 56153641 | 4.71 |
| chr17 | 56156237 | 56157125 | 3.7  |
| chr17 | 56159561 | 56164284 | 4.71 |
| chr17 | 56184433 | 56185953 | 3.36 |
| chr17 | 56191328 | 56193596 | 3.7  |
| chr17 | 56197200 | 56198519 | 4.37 |
| chr17 | 56202984 | 56203851 | 3.03 |
| chr17 | 56210485 | 56212155 | 3.03 |
| chr17 | 56214669 | 56215490 | 3.36 |
| chr17 | 56220962 | 56225266 | 6.05 |
| chr17 | 56237766 | 56238667 | 3.36 |
| chr17 | 56239038 | 56241122 | 4.04 |
| chr17 | 56242345 | 56244745 | 4.37 |
| chr17 | 56246249 | 56247269 | 3.7  |
| chr17 | 56249364 | 56250933 | 3.7  |
| chr17 | 56253137 | 56254530 | 4.37 |
| chr17 | 56258624 | 56260003 | 3.7  |
| chr17 | 56279133 | 56280751 | 3.7  |
| chr17 | 56287913 | 56288766 | 3.36 |
| chr17 | 56292569 | 56293585 | 3.7  |
| chr17 | 56295826 | 56297926 | 5.38 |
| chr17 | 56303178 | 56304500 | 4.37 |
| chr17 | 56304747 | 56306414 | 4.37 |
| chr17 | 56319183 | 56320338 | 4.37 |
| chr17 | 56326540 | 56327709 | 3.36 |
| chr17 | 56335993 | 56337220 | 3.7  |

|       |          |          |       |
|-------|----------|----------|-------|
| chr17 | 56343998 | 56345235 | 4.37  |
| chr17 | 56347975 | 56349715 | 3.36  |
| chr17 | 56352902 | 56353904 | 4.04  |
| chr17 | 56369722 | 56370726 | 3.7   |
| chr17 | 56375239 | 56377301 | 4.04  |
| chr17 | 56381219 | 56383466 | 4.04  |
| chr17 | 56394697 | 56396319 | 4.04  |
| chr17 | 56397870 | 56398911 | 3.7   |
| chr17 | 56408491 | 56409981 | 4.37  |
| chr17 | 56412699 | 56414328 | 4.04  |
| chr17 | 56425899 | 56426916 | 3.03  |
| chr17 | 56428847 | 56431450 | 5.05  |
| chr17 | 56443423 | 56444441 | 3.7   |
| chr17 | 56448287 | 56449774 | 4.04  |
| chr17 | 56452206 | 56455439 | 5.72  |
| chr17 | 56456939 | 56458043 | 4.04  |
| chr17 | 56462335 | 56464422 | 4.04  |
| chr17 | 56464679 | 56469814 | 6.73  |
| chr17 | 56471372 | 56472193 | 3.36  |
| chr17 | 56475120 | 56476677 | 4.04  |
| chr17 | 56489184 | 56490750 | 3.36  |
| chr17 | 56492565 | 56495687 | 6.05  |
| chr17 | 56514469 | 56515394 | 3.03  |
| chr17 | 56524429 | 56525789 | 5.05  |
| chr17 | 56531434 | 56533034 | 3.7   |
| chr17 | 56545645 | 56546678 | 3.36  |
| chr17 | 56569691 | 56570561 | 3.36  |
| chr17 | 56590505 | 56592316 | 5.05  |
| chr17 | 56594995 | 56598977 | 6.73  |
| chr17 | 56603759 | 56604836 | 3.7   |
| chr17 | 56609830 | 56611073 | 4.04  |
| chr17 | 56612707 | 56614352 | 3.36  |
| chr17 | 56617389 | 56619129 | 4.04  |
| chr17 | 56628044 | 56629337 | 4.37  |
| chr17 | 56635976 | 56924204 | 19.84 |
| chr17 | 56924564 | 56925779 | 3.7   |
| chr17 | 56928270 | 57200464 | 48.77 |
| chr17 | 57211980 | 57213480 | 4.04  |
| chr17 | 57214280 | 57216627 | 4.04  |
| chr17 | 57221460 | 57223776 | 4.71  |
| chr17 | 57224696 | 57228529 | 4.71  |
| chr17 | 57229695 | 57234715 | 6.39  |
| chr17 | 57236338 | 57238271 | 4.04  |

|       |          |          |       |
|-------|----------|----------|-------|
| chr17 | 57238698 | 57240239 | 3.7   |
| chr17 | 57240517 | 57242332 | 4.04  |
| chr17 | 57242840 | 57244186 | 6.05  |
| chr17 | 57261741 | 57263620 | 4.37  |
| chr17 | 57267622 | 57268661 | 3.7   |
| chr17 | 57269194 | 57270051 | 4.04  |
| chr17 | 57274793 | 57277105 | 4.71  |
| chr17 | 57279406 | 57280576 | 3.36  |
| chr17 | 57286277 | 57289694 | 11.44 |
| chr17 | 57289984 | 57291233 | 3.36  |
| chr17 | 57294965 | 57296293 | 3.7   |
| chr17 | 57296507 | 57299562 | 4.71  |
| chr17 | 57305329 | 57306492 | 4.37  |
| chr17 | 57307847 | 57309716 | 4.71  |
| chr17 | 57311658 | 57312580 | 4.71  |
| chr17 | 57314240 | 57315497 | 4.71  |
| chr17 | 57315738 | 57318677 | 4.37  |
| chr17 | 57320756 | 57321897 | 3.03  |
| chr17 | 57326865 | 57328284 | 3.7   |
| chr17 | 57330060 | 57331516 | 4.37  |
| chr17 | 57334342 | 57335082 | 3.7   |
| chr17 | 57347990 | 57350680 | 4.04  |
| chr17 | 57353439 | 57354961 | 4.04  |
| chr17 | 57356855 | 57358135 | 3.7   |
| chr17 | 57362008 | 57363114 | 4.04  |
| chr17 | 57365671 | 57367614 | 3.7   |
| chr17 | 57368893 | 57370413 | 5.05  |
| chr17 | 57370910 | 57375277 | 7.74  |
| chr17 | 57375571 | 57377603 | 3.7   |
| chr17 | 57380134 | 57381102 | 3.03  |
| chr17 | 57381797 | 57383308 | 4.71  |
| chr17 | 57387714 | 57389038 | 4.37  |
| chr17 | 57391747 | 57393486 | 5.05  |
| chr17 | 57393906 | 57395228 | 4.71  |
| chr17 | 57396072 | 57397291 | 4.04  |
| chr17 | 57398614 | 57414576 | 6.39  |
| chr17 | 57414799 | 57417561 | 5.38  |
| chr17 | 57419103 | 57421876 | 5.05  |
| chr17 | 57422115 | 57426108 | 5.05  |
| chr17 | 57429219 | 57436900 | 5.05  |
| chr17 | 57438346 | 57455285 | 6.39  |
| chr17 | 57455984 | 57457359 | 3.7   |
| chr17 | 57457561 | 57460329 | 4.04  |

|       |          |          |      |
|-------|----------|----------|------|
| chr17 | 57461378 | 57468830 | 5.38 |
| chr17 | 57470096 | 57470975 | 4.71 |
| chr17 | 57474322 | 57477603 | 4.71 |
| chr17 | 57478518 | 57485145 | 5.38 |
| chr17 | 57486388 | 57489380 | 4.71 |
| chr17 | 57490229 | 57494198 | 5.05 |
| chr17 | 57496821 | 57497537 | 3.7  |
| chr17 | 57499154 | 57501865 | 6.39 |
| chr17 | 57504696 | 57509525 | 4.37 |
| chr17 | 57509810 | 57511001 | 5.05 |
| chr17 | 57512098 | 57513377 | 5.38 |
| chr17 | 57514376 | 57515802 | 4.37 |
| chr17 | 57517597 | 57519887 | 5.72 |
| chr17 | 57522107 | 57522959 | 4.04 |
| chr17 | 57528630 | 57529753 | 4.37 |
| chr17 | 57532402 | 57534704 | 5.72 |
| chr17 | 57538696 | 57540374 | 3.7  |
| chr17 | 57541914 | 57543349 | 6.05 |
| chr17 | 57544261 | 57545670 | 4.04 |
| chr17 | 57546772 | 57549279 | 4.04 |
| chr17 | 57552783 | 57555628 | 5.72 |
| chr17 | 57559075 | 57560524 | 4.04 |
| chr17 | 57563101 | 57567526 | 4.04 |
| chr17 | 57568112 | 57570214 | 4.37 |
| chr17 | 57570706 | 57574549 | 7.74 |
| chr17 | 57574786 | 57576987 | 5.05 |
| chr17 | 57578525 | 57579415 | 3.36 |
| chr17 | 57582105 | 57585502 | 5.05 |
| chr17 | 57588600 | 57589850 | 4.37 |
| chr17 | 57591162 | 57593026 | 5.72 |
| chr17 | 57594616 | 57601975 | 5.38 |
| chr17 | 57602419 | 57609274 | 5.72 |
| chr17 | 57609780 | 57610653 | 5.05 |
| chr17 | 57613611 | 57615251 | 4.04 |
| chr17 | 57615779 | 57617712 | 4.37 |
| chr17 | 57617924 | 57621134 | 5.05 |
| chr17 | 57624108 | 57626410 | 3.7  |
| chr17 | 57628994 | 57630317 | 4.71 |
| chr17 | 57634251 | 57636264 | 4.71 |
| chr17 | 57637903 | 57639119 | 4.71 |
| chr17 | 57639717 | 57645118 | 7.74 |
| chr17 | 57680740 | 57681861 | 5.05 |
| chr17 | 57682398 | 57683347 | 3.36 |

|       |          |          |       |
|-------|----------|----------|-------|
| chr17 | 57687347 | 57689058 | 4.37  |
| chr17 | 57691776 | 57692633 | 4.04  |
| chr17 | 57694429 | 57703415 | 10.09 |
| chr17 | 57703678 | 57707361 | 4.71  |
| chr17 | 57707782 | 57709408 | 3.7   |
| chr17 | 57711612 | 57714106 | 6.05  |
| chr17 | 57714949 | 57718069 | 4.37  |
| chr17 | 57718830 | 57721372 | 5.05  |
| chr17 | 57723059 | 57730700 | 7.4   |
| chr17 | 57735399 | 57736864 | 5.05  |
| chr17 | 57737086 | 57740625 | 4.04  |
| chr17 | 57742777 | 57744336 | 5.05  |
| chr17 | 57744951 | 57746821 | 4.37  |
| chr17 | 57750085 | 57753119 | 3.7   |
| chr17 | 57753665 | 57756708 | 4.71  |
| chr17 | 57757596 | 57761534 | 4.71  |
| chr17 | 57761811 | 57764489 | 4.37  |
| chr17 | 57764693 | 57768797 | 4.04  |
| chr17 | 57770126 | 57771061 | 3.7   |
| chr17 | 57771572 | 57772476 | 4.71  |
| chr17 | 57772850 | 57776070 | 5.05  |
| chr17 | 57779550 | 57780884 | 4.37  |
| chr17 | 57782599 | 57790434 | 6.39  |
| chr17 | 57795946 | 57797117 | 3.36  |
| chr17 | 57798311 | 57801697 | 4.71  |
| chr17 | 57802329 | 57807737 | 5.72  |
| chr17 | 57810807 | 57813510 | 4.71  |
| chr17 | 57814185 | 57816831 | 4.37  |
| chr17 | 57818480 | 57825188 | 6.39  |
| chr17 | 57828795 | 57837782 | 7.06  |
| chr17 | 57839340 | 57844959 | 4.71  |
| chr17 | 57846531 | 57849110 | 4.37  |
| chr17 | 57850788 | 57852718 | 3.7   |
| chr17 | 57853047 | 57856887 | 6.39  |
| chr17 | 57857774 | 57865470 | 9.42  |
| chr17 | 57866797 | 57867648 | 4.37  |
| chr17 | 57867951 | 57870211 | 4.71  |
| chr17 | 57871534 | 57872662 | 4.71  |
| chr17 | 57872943 | 57874596 | 6.05  |
| chr17 | 57878382 | 57883238 | 6.39  |
| chr17 | 57883556 | 57884713 | 4.04  |
| chr17 | 57885049 | 57886049 | 3.36  |
| chr17 | 57888879 | 57889847 | 3.36  |

|       |          |          |       |
|-------|----------|----------|-------|
| chr17 | 57891361 | 57893104 | 3.7   |
| chr17 | 57894836 | 57895650 | 4.04  |
| chr17 | 57896763 | 57898537 | 4.37  |
| chr17 | 57899867 | 57901036 | 5.38  |
| chr17 | 57902074 | 58053045 | 34.31 |
| chr17 | 58054183 | 58055287 | 4.04  |
| chr17 | 58056128 | 58056907 | 3.7   |
| chr17 | 58060260 | 58061455 | 4.37  |
| chr17 | 58064089 | 58064897 | 3.7   |
| chr17 | 58065457 | 58067250 | 5.38  |
| chr17 | 58074923 | 58076585 | 5.72  |
| chr17 | 58078862 | 58084517 | 9.75  |
| chr17 | 58085288 | 58086123 | 5.05  |
| chr17 | 58088676 | 58089467 | 4.04  |
| chr17 | 58090102 | 58090906 | 4.37  |
| chr17 | 58093653 | 58094916 | 4.71  |
| chr17 | 58095284 | 58097614 | 7.74  |
| chr17 | 58110794 | 58111549 | 6.05  |
| chr17 | 58111935 | 58119910 | 22.87 |
| chr17 | 58120246 | 58188444 | 29.94 |
| chr17 | 58203884 | 58288753 | 19.17 |
| chr17 | 58289127 | 58293175 | 5.38  |
| chr17 | 58295221 | 58297009 | 4.04  |
| chr17 | 58297464 | 58628583 | 69.96 |
| chr17 | 58629561 | 58849369 | 65.93 |
| chr17 | 58849726 | 58881342 | 15.47 |
| chr17 | 58885235 | 58887515 | 5.05  |
| chr17 | 58888082 | 58896863 | 5.05  |
| chr17 | 58897572 | 58902600 | 4.04  |
| chr17 | 58903585 | 58908504 | 5.38  |
| chr17 | 58909645 | 58919091 | 4.71  |
| chr17 | 58922234 | 58929092 | 5.05  |
| chr17 | 58932263 | 58936910 | 6.05  |
| chr17 | 58937377 | 58944599 | 6.05  |
| chr17 | 58944843 | 58949667 | 4.71  |
| chr17 | 58949945 | 58952661 | 4.71  |
| chr17 | 58953194 | 58958014 | 5.05  |
| chr17 | 58964674 | 58967137 | 5.05  |
| chr17 | 58967823 | 58969791 | 4.04  |
| chr17 | 58970128 | 58977257 | 7.06  |
| chr17 | 58978122 | 58981646 | 3.7   |
| chr17 | 58982702 | 58986104 | 4.04  |
| chr17 | 58986906 | 58988509 | 4.37  |

|       |          |          |       |
|-------|----------|----------|-------|
| chr17 | 58989705 | 58997951 | 11.1  |
| chr17 | 58999594 | 59006572 | 5.38  |
| chr17 | 59010052 | 59012859 | 4.71  |
| chr17 | 59014377 | 59015572 | 4.37  |
| chr17 | 59016106 | 59023301 | 5.72  |
| chr17 | 59024043 | 59025533 | 3.7   |
| chr17 | 59026555 | 59029462 | 4.71  |
| chr17 | 59029873 | 59047626 | 6.39  |
| chr17 | 59048655 | 59050754 | 3.7   |
| chr17 | 59050992 | 59053422 | 5.05  |
| chr17 | 59057521 | 59062061 | 4.37  |
| chr17 | 59064319 | 59071765 | 4.71  |
| chr17 | 59072736 | 59075951 | 4.37  |
| chr17 | 59077110 | 59083131 | 5.38  |
| chr17 | 59084065 | 59087068 | 5.05  |
| chr17 | 59088664 | 59093827 | 4.71  |
| chr17 | 59094135 | 59095491 | 4.37  |
| chr17 | 59095769 | 59098619 | 6.39  |
| chr17 | 59100438 | 59115224 | 5.38  |
| chr17 | 59115704 | 59116728 | 3.7   |
| chr17 | 59117489 | 59120113 | 4.71  |
| chr17 | 59123891 | 59126069 | 4.37  |
| chr17 | 59128834 | 59136186 | 5.38  |
| chr17 | 59137821 | 59144211 | 4.71  |
| chr17 | 59145272 | 59147031 | 4.71  |
| chr17 | 59147825 | 59152299 | 4.71  |
| chr17 | 59152983 | 59155836 | 4.04  |
| chr17 | 59157903 | 59160553 | 4.04  |
| chr17 | 59161022 | 59166647 | 6.39  |
| chr17 | 59167009 | 59172077 | 7.06  |
| chr17 | 59173435 | 59186143 | 6.05  |
| chr17 | 59193433 | 59200495 | 7.4   |
| chr17 | 59203086 | 59208286 | 4.71  |
| chr17 | 59208961 | 59216941 | 5.38  |
| chr17 | 59219144 | 59224717 | 4.71  |
| chr17 | 59225002 | 59242399 | 6.05  |
| chr17 | 59243624 | 59247113 | 5.72  |
| chr17 | 59247792 | 59249755 | 5.72  |
| chr17 | 59251284 | 59263666 | 5.05  |
| chr17 | 59264178 | 59281138 | 9.08  |
| chr17 | 59281866 | 59285615 | 6.05  |
| chr17 | 59286735 | 59987065 | 75.01 |
| chr17 | 59993024 | 59995624 | 5.38  |



|       |          |          |       |
|-------|----------|----------|-------|
| chr17 | 59998176 | 59999356 | 3.7   |
| chr17 | 60000729 | 60002589 | 11.77 |
| chr17 | 60003254 | 60006441 | 8.75  |
| chr17 | 60006700 | 60009255 | 4.71  |
| chr17 | 60009649 | 60011339 | 3.7   |
| chr17 | 60017471 | 60021181 | 6.39  |
| chr17 | 60021688 | 60025608 | 5.38  |
| chr17 | 60026565 | 60027322 | 3.7   |
| chr17 | 60028007 | 60029106 | 4.04  |
| chr17 | 60031848 | 60034336 | 4.71  |
| chr17 | 60037211 | 60040480 | 3.7   |
| chr17 | 60040821 | 60041826 | 3.36  |
| chr17 | 60042183 | 60044156 | 4.04  |
| chr17 | 60044791 | 60046141 | 4.71  |
| chr17 | 60047106 | 60048098 | 4.37  |
| chr17 | 60049737 | 60051062 | 4.71  |
| chr17 | 60054604 | 60062437 | 4.71  |
| chr17 | 60062850 | 60065057 | 5.05  |
| chr17 | 60066524 | 60067783 | 4.37  |
| chr17 | 60072286 | 60083626 | 21.86 |
| chr17 | 60085719 | 60089393 | 4.71  |
| chr17 | 60090285 | 60091649 | 5.38  |
| chr17 | 60093308 | 60097325 | 19.51 |
| chr17 | 60098980 | 60101437 | 4.04  |
| chr17 | 60102933 | 60104622 | 3.7   |
| chr17 | 60105085 | 60105929 | 4.04  |
| chr17 | 60106163 | 60109305 | 4.37  |
| chr17 | 60109586 | 60116575 | 5.05  |
| chr17 | 60119815 | 60121988 | 4.71  |
| chr17 | 60122440 | 60124566 | 4.37  |
| chr17 | 60125449 | 60127067 | 5.05  |
| chr17 | 60128222 | 60137504 | 4.71  |
| chr17 | 60138317 | 60145301 | 6.73  |
| chr17 | 60147791 | 60149246 | 4.37  |
| chr17 | 60149562 | 60150526 | 3.7   |
| chr17 | 60151791 | 60156450 | 4.37  |
| chr17 | 60156705 | 60159603 | 4.37  |
| chr17 | 60161065 | 60163843 | 4.37  |
| chr17 | 60164057 | 60169315 | 4.37  |
| chr17 | 60169908 | 60174462 | 5.38  |
| chr17 | 60175046 | 60184988 | 6.39  |
| chr17 | 60185633 | 60192621 | 20.85 |
| chr17 | 60193780 | 60194600 | 3.7   |

|       |          |          |       |
|-------|----------|----------|-------|
| chr17 | 60196478 | 60200378 | 5.05  |
| chr17 | 60200944 | 60205933 | 5.38  |
| chr17 | 60207118 | 60209532 | 20.18 |
| chr17 | 60211501 | 60216555 | 20.18 |
| chr17 | 60217556 | 60219096 | 3.7   |
| chr17 | 60219503 | 60223286 | 5.05  |
| chr17 | 60224975 | 60228521 | 4.37  |
| chr17 | 60232296 | 60233292 | 4.04  |
| chr17 | 60233962 | 60234861 | 4.37  |
| chr17 | 60235483 | 60246728 | 5.38  |
| chr17 | 60246949 | 60248466 | 4.71  |
| chr17 | 60248746 | 60252535 | 6.39  |
| chr17 | 60253955 | 60259136 | 6.73  |
| chr17 | 60259403 | 60261463 | 5.72  |
| chr17 | 60262022 | 60264847 | 4.04  |
| chr17 | 60265379 | 60270603 | 6.73  |
| chr17 | 60271379 | 60273155 | 5.05  |
| chr17 | 60273467 | 60275629 | 4.04  |
| chr17 | 60276904 | 60278060 | 4.37  |
| chr17 | 60279157 | 60280494 | 4.37  |
| chr17 | 60282057 | 60285584 | 5.72  |
| chr17 | 60291154 | 60297080 | 6.05  |
| chr17 | 60321868 | 60323267 | 4.37  |
| chr17 | 60373161 | 60373857 | 4.04  |
| chr17 | 60376526 | 60378100 | 4.71  |
| chr17 | 60378819 | 60382705 | 4.71  |
| chr17 | 60384609 | 60400870 | 5.05  |
| chr17 | 60404535 | 60407097 | 4.71  |
| chr17 | 60408020 | 60409499 | 4.04  |
| chr17 | 60410432 | 60413649 | 5.05  |
| chr17 | 60414035 | 60415595 | 4.71  |
| chr17 | 60417928 | 60419114 | 3.36  |
| chr17 | 60419823 | 60423938 | 5.05  |
| chr17 | 60424957 | 60427415 | 5.72  |
| chr17 | 60427887 | 60428930 | 3.36  |
| chr17 | 60429156 | 60431001 | 5.05  |
| chr17 | 60431967 | 60434459 | 5.38  |
| chr17 | 60442768 | 60447843 | 5.05  |
| chr17 | 60448769 | 60449918 | 5.38  |
| chr17 | 60451745 | 60456943 | 4.37  |
| chr17 | 60457162 | 60458466 | 5.05  |
| chr17 | 60458864 | 60469797 | 6.73  |
| chr17 | 60470124 | 60474611 | 5.38  |

|       |          |          |      |
|-------|----------|----------|------|
| chr17 | 60476369 | 60477774 | 6.05 |
| chr17 | 60481988 | 60487032 | 4.71 |
| chr17 | 60489841 | 60491303 | 4.71 |
| chr17 | 60500194 | 60502577 | 5.38 |
| chr17 | 60520773 | 60521785 | 4.04 |
| chr17 | 60524870 | 60526696 | 4.71 |
| chr17 | 60540749 | 60541667 | 3.7  |
| chr17 | 60547743 | 60548900 | 6.73 |
| chr17 | 60549480 | 60551619 | 5.05 |
| chr17 | 60554034 | 60556544 | 4.71 |
| chr17 | 60557923 | 60558782 | 3.7  |
| chr17 | 60565842 | 60566835 | 4.04 |
| chr17 | 60569855 | 60570968 | 3.7  |
| chr17 | 60582058 | 60583211 | 4.37 |
| chr17 | 60584335 | 60585118 | 3.7  |
| chr17 | 60614348 | 60616823 | 5.38 |
| chr17 | 60639508 | 60641200 | 6.05 |
| chr17 | 60641485 | 60642804 | 5.72 |
| chr17 | 60643489 | 60645698 | 4.71 |
| chr17 | 60646906 | 60649101 | 5.05 |
| chr17 | 60650287 | 60651803 | 4.37 |
| chr17 | 60652683 | 60656208 | 4.71 |
| chr17 | 60656705 | 60664090 | 4.71 |
| chr17 | 60664429 | 60669495 | 4.71 |
| chr17 | 60672684 | 60676051 | 4.71 |
| chr17 | 60676339 | 60681336 | 5.38 |
| chr17 | 60682653 | 60684195 | 3.36 |
| chr17 | 60684705 | 60685784 | 4.37 |
| chr17 | 60686029 | 60689883 | 5.05 |
| chr17 | 60694157 | 60697515 | 5.05 |
| chr17 | 60697789 | 60701248 | 4.37 |
| chr17 | 60701675 | 60710896 | 6.73 |
| chr17 | 60712074 | 60713325 | 3.7  |
| chr17 | 60715023 | 60716021 | 3.36 |
| chr17 | 60717469 | 60723072 | 6.39 |
| chr17 | 60723682 | 60726345 | 5.38 |
| chr17 | 60727338 | 60739489 | 6.39 |
| chr17 | 60739715 | 60740579 | 4.04 |
| chr17 | 60741235 | 60746696 | 6.05 |
| chr17 | 60747169 | 60750453 | 5.38 |
| chr17 | 60752069 | 60754544 | 4.37 |
| chr17 | 60755344 | 60759519 | 4.04 |
| chr17 | 60762298 | 60763094 | 3.7  |

|       |          |          |       |
|-------|----------|----------|-------|
| chr17 | 60765250 | 60767358 | 3.7   |
| chr17 | 60768739 | 60769862 | 4.04  |
| chr17 | 60770121 | 60773044 | 4.37  |
| chr17 | 60773396 | 60776094 | 4.37  |
| chr17 | 60778231 | 60779206 | 3.03  |
| chr17 | 60779881 | 60791691 | 9.75  |
| chr17 | 60792108 | 60799178 | 5.05  |
| chr17 | 60799536 | 60806193 | 6.73  |
| chr17 | 60808732 | 60810424 | 4.04  |
| chr17 | 60811674 | 60816410 | 5.38  |
| chr17 | 60819361 | 60820497 | 4.37  |
| chr17 | 60820882 | 60822312 | 4.37  |
| chr17 | 60822624 | 60825432 | 4.71  |
| chr17 | 60827778 | 60830382 | 5.05  |
| chr17 | 60830696 | 60835310 | 4.71  |
| chr17 | 60835742 | 60842018 | 5.05  |
| chr17 | 60843771 | 60844594 | 4.37  |
| chr17 | 60845264 | 60846843 | 4.04  |
| chr17 | 60847045 | 60848049 | 3.36  |
| chr17 | 60849635 | 60861176 | 10.76 |
| chr17 | 60863815 | 60865715 | 6.05  |
| chr17 | 60866350 | 60870331 | 6.39  |
| chr17 | 60871424 | 60874088 | 4.37  |
| chr17 | 60874973 | 60882729 | 6.73  |
| chr17 | 60882964 | 60887819 | 5.72  |
| chr17 | 60888476 | 60894450 | 5.72  |
| chr17 | 60895486 | 60899353 | 6.39  |
| chr17 | 60900476 | 60903456 | 4.71  |
| chr17 | 60904022 | 60905983 | 4.04  |
| chr17 | 60906304 | 60907560 | 4.04  |
| chr17 | 60908931 | 60921822 | 5.38  |
| chr17 | 60922876 | 60927605 | 6.05  |
| chr17 | 60928275 | 60929719 | 3.36  |
| chr17 | 60930171 | 60935983 | 5.05  |
| chr17 | 60936236 | 60951621 | 9.42  |
| chr17 | 60952016 | 60979712 | 7.74  |
| chr17 | 60980158 | 60982212 | 4.37  |
| chr17 | 60983786 | 60992205 | 6.39  |
| chr17 | 60993491 | 60994560 | 4.37  |
| chr17 | 60995677 | 60999596 | 5.05  |
| chr17 | 61001252 | 61008486 | 5.72  |
| chr17 | 61009277 | 61022198 | 7.74  |
| chr17 | 61022411 | 61032406 | 15.14 |

|       |          |          |       |
|-------|----------|----------|-------|
| chr17 | 61032714 | 61052392 | 20.18 |
| chr17 | 61052704 | 61068901 | 7.74  |
| chr17 | 61070475 | 61074192 | 6.73  |
| chr17 | 61074528 | 61091991 | 15.81 |
| chr17 | 61093043 | 61102780 | 10.09 |
| chr17 | 61103109 | 61106529 | 4.37  |
| chr17 | 61106753 | 61114226 | 5.72  |
| chr17 | 61115250 | 61123417 | 6.39  |
| chr17 | 61124032 | 61133112 | 6.05  |
| chr17 | 61133320 | 61140694 | 5.38  |
| chr17 | 61142320 | 61144880 | 4.37  |
| chr17 | 61146580 | 61150189 | 5.05  |
| chr17 | 61152888 | 61157850 | 4.71  |
| chr17 | 61158141 | 61161535 | 4.37  |
| chr17 | 61162471 | 61167484 | 5.05  |
| chr17 | 61169289 | 61171217 | 5.05  |
| chr17 | 61171562 | 61175462 | 4.37  |
| chr17 | 61175899 | 61178853 | 4.37  |
| chr17 | 61186093 | 61187023 | 3.7   |
| chr17 | 61191402 | 61192896 | 3.36  |
| chr17 | 61193340 | 61194545 | 4.04  |
| chr17 | 61201416 | 61202267 | 5.05  |
| chr17 | 61202609 | 61205799 | 3.7   |
| chr17 | 61215166 | 61216721 | 3.36  |
| chr17 | 61245362 | 61246519 | 5.38  |
| chr17 | 61247724 | 61252400 | 5.05  |
| chr17 | 61252872 | 61254076 | 5.38  |
| chr17 | 61254653 | 61258918 | 4.71  |
| chr17 | 61267599 | 61268894 | 3.7   |
| chr17 | 61270848 | 61272354 | 3.7   |
| chr17 | 61284871 | 61286591 | 4.71  |
| chr17 | 61290990 | 61292242 | 4.04  |
| chr17 | 61302621 | 61303953 | 4.37  |
| chr17 | 61308816 | 61310077 | 4.71  |
| chr17 | 61329896 | 61331368 | 4.37  |
| chr17 | 61350806 | 61352035 | 4.37  |
| chr17 | 61352485 | 61354143 | 4.37  |
| chr17 | 61358863 | 61365027 | 6.05  |
| chr17 | 61385510 | 61387138 | 5.05  |
| chr17 | 61387492 | 61389385 | 5.05  |
| chr17 | 61400645 | 61402124 | 3.7   |
| chr17 | 61402783 | 61403619 | 2.69  |
| chr17 | 61420041 | 61421052 | 3.7   |

|       |          |          |      |
|-------|----------|----------|------|
| chr17 | 61427593 | 61428512 | 3.36 |
| chr17 | 61430754 | 61431807 | 2.02 |
| chr17 | 61436741 | 61443084 | 6.39 |
| chr17 | 61449151 | 61450601 | 4.37 |
| chr17 | 61453288 | 61460090 | 5.72 |
| chr17 | 61461778 | 61463012 | 3.7  |
| chr17 | 61476546 | 61477774 | 3.7  |
| chr17 | 61479342 | 61480911 | 4.71 |
| chr17 | 61481217 | 61485975 | 5.05 |
| chr17 | 61486368 | 61488001 | 3.36 |
| chr17 | 61490206 | 61493610 | 4.71 |
| chr17 | 61493890 | 61500994 | 4.37 |
| chr17 | 61501274 | 61506265 | 5.05 |
| chr17 | 61506574 | 61508125 | 3.7  |
| chr17 | 61508384 | 61515078 | 7.74 |
| chr17 | 61515440 | 61518244 | 6.39 |
| chr17 | 61518811 | 61526163 | 9.42 |
| chr17 | 61526879 | 61533331 | 4.71 |
| chr17 | 61535722 | 61538955 | 5.38 |
| chr17 | 61541642 | 61543007 | 4.37 |
| chr17 | 61543712 | 61545318 | 3.36 |
| chr17 | 61546068 | 61547306 | 5.05 |
| chr17 | 61553364 | 61559205 | 4.71 |
| chr17 | 61566820 | 61570008 | 4.71 |
| chr17 | 61571093 | 61574128 | 4.04 |
| chr17 | 61574743 | 61575930 | 4.04 |
| chr17 | 61579972 | 61581486 | 4.37 |
| chr17 | 61582124 | 61585306 | 5.38 |
| chr17 | 61585665 | 61587367 | 5.05 |
| chr17 | 61591082 | 61593033 | 4.71 |
| chr17 | 61594077 | 61599145 | 5.38 |
| chr17 | 61599791 | 61603612 | 4.71 |
| chr17 | 61606415 | 61607680 | 3.36 |
| chr17 | 61608587 | 61610402 | 4.04 |
| chr17 | 61615219 | 61616948 | 3.36 |
| chr17 | 61617548 | 61618917 | 3.36 |
| chr17 | 61620077 | 61621045 | 4.04 |
| chr17 | 61623773 | 61624611 | 4.71 |
| chr17 | 61626901 | 61630659 | 6.05 |
| chr17 | 61637001 | 61638423 | 4.04 |
| chr17 | 61641476 | 61642715 | 4.37 |
| chr17 | 61648711 | 61651917 | 4.04 |
| chr17 | 61653799 | 61655184 | 3.7  |

|       |          |          |      |
|-------|----------|----------|------|
| chr17 | 61656000 | 61657042 | 3.36 |
| chr17 | 61667038 | 61668938 | 4.37 |
| chr17 | 61670201 | 61671841 | 3.7  |
| chr17 | 61674283 | 61675806 | 4.04 |
| chr17 | 61677356 | 61679696 | 7.74 |
| chr17 | 61682340 | 61683769 | 4.04 |
| chr17 | 61688180 | 61690037 | 3.7  |
| chr17 | 61698436 | 61702077 | 6.05 |
| chr17 | 61702754 | 61704092 | 4.37 |
| chr17 | 61710668 | 61713728 | 4.04 |
| chr17 | 61715534 | 61716410 | 3.7  |
| chr17 | 61722335 | 61724545 | 3.7  |
| chr17 | 61729625 | 61730863 | 5.05 |
| chr17 | 61731344 | 61732285 | 3.7  |
| chr17 | 61734877 | 61736103 | 4.37 |
| chr17 | 61739284 | 61740447 | 3.7  |
| chr17 | 61741439 | 61742542 | 4.04 |
| chr17 | 61752544 | 61754815 | 5.05 |
| chr17 | 61756269 | 61760112 | 5.05 |
| chr17 | 61761424 | 61763003 | 3.7  |
| chr17 | 61768476 | 61770255 | 4.04 |
| chr17 | 61773354 | 61775866 | 5.05 |
| chr17 | 61776592 | 61778010 | 3.7  |
| chr17 | 61779423 | 61784935 | 4.71 |
| chr17 | 61792026 | 61793321 | 6.05 |
| chr17 | 61803374 | 61804410 | 4.04 |
| chr17 | 61818147 | 61820441 | 8.75 |
| chr17 | 61823883 | 61825467 | 4.37 |
| chr17 | 61827182 | 61828126 | 3.7  |
| chr17 | 61828606 | 61832390 | 5.05 |
| chr17 | 61834501 | 61835698 | 3.7  |
| chr17 | 61839100 | 61840373 | 4.04 |
| chr17 | 61843916 | 61845341 | 4.04 |
| chr17 | 61846957 | 61848483 | 5.05 |
| chr17 | 61849749 | 61854038 | 5.38 |
| chr17 | 61857398 | 61858625 | 5.72 |
| chr17 | 61859629 | 61860378 | 3.03 |
| chr17 | 61873446 | 61874656 | 4.37 |
| chr17 | 61885942 | 61886988 | 3.03 |
| chr17 | 61898606 | 61899459 | 3.7  |
| chr17 | 61903147 | 61907110 | 6.05 |
| chr17 | 61909224 | 61911506 | 4.04 |
| chr17 | 61911862 | 61913091 | 6.39 |

|       |          |          |       |
|-------|----------|----------|-------|
| chr17 | 61915328 | 61917201 | 7.06  |
| chr17 | 61917717 | 61921924 | 12.78 |
| chr17 | 61929712 | 61930712 | 4.04  |
| chr17 | 61958208 | 61959462 | 4.04  |
| chr17 | 62004674 | 62006157 | 3.36  |
| chr17 | 62007115 | 62008133 | 3.7   |
| chr17 | 62019779 | 62021393 | 4.04  |
| chr17 | 62026240 | 62029375 | 4.04  |
| chr17 | 62031005 | 62031799 | 4.04  |
| chr17 | 62036360 | 62037857 | 4.71  |
| chr17 | 62043347 | 62044534 | 4.37  |
| chr17 | 62059153 | 62063625 | 4.71  |
| chr17 | 62065562 | 62068473 | 4.04  |
| chr17 | 62079878 | 62083369 | 4.71  |
| chr17 | 62085656 | 62088753 | 4.04  |
| chr17 | 62089627 | 62090782 | 4.37  |
| chr17 | 62098972 | 62100247 | 4.71  |
| chr17 | 62102084 | 62103302 | 3.36  |
| chr17 | 62139024 | 62140103 | 4.04  |
| chr17 | 62145942 | 62147660 | 3.7   |
| chr17 | 62150973 | 62152213 | 3.7   |
| chr17 | 62158725 | 62162695 | 5.38  |
| chr17 | 62164289 | 62165030 | 3.7   |
| chr17 | 62167394 | 62169076 | 3.36  |
| chr17 | 62169927 | 62171561 | 3.36  |
| chr17 | 62175461 | 62176399 | 2.02  |
| chr17 | 62183983 | 62185313 | 4.71  |
| chr17 | 62193395 | 62194228 | 3.7   |
| chr17 | 62200205 | 62201679 | 3.7   |
| chr17 | 62203228 | 62204842 | 4.37  |
| chr17 | 62205994 | 62209682 | 4.71  |
| chr17 | 62222338 | 62226590 | 6.39  |
| chr17 | 62231066 | 62232817 | 3.7   |
| chr17 | 62242188 | 62243409 | 4.04  |
| chr17 | 62257450 | 62258312 | 3.7   |
| chr17 | 62274719 | 62276222 | 4.37  |
| chr17 | 62289283 | 62290106 | 2.02  |
| chr17 | 62293626 | 62294753 | 3.7   |
| chr17 | 62307658 | 62309673 | 3.7   |
| chr17 | 62310942 | 62312575 | 4.04  |
| chr17 | 62328999 | 62330220 | 4.04  |
| chr17 | 62330793 | 62332450 | 3.7   |
| chr17 | 62337670 | 62341246 | 5.05  |



|       |          |          |       |
|-------|----------|----------|-------|
| chr17 | 62342226 | 62343425 | 4.71  |
| chr17 | 62345754 | 62347706 | 4.04  |
| chr17 | 62352120 | 62353347 | 4.04  |
| chr17 | 62368151 | 62369532 | 5.72  |
| chr17 | 62370152 | 62370995 | 3.7   |
| chr17 | 62373353 | 62375580 | 4.37  |
| chr17 | 62387513 | 62410922 | 15.81 |
| chr17 | 62485778 | 62487555 | 4.04  |
| chr17 | 62492071 | 62494562 | 6.05  |
| chr17 | 62496474 | 62498625 | 4.71  |
| chr17 | 62498862 | 62504911 | 7.06  |
| chr17 | 62517031 | 62518553 | 3.7   |
| chr17 | 62522918 | 62524066 | 4.04  |
| chr17 | 62532342 | 62533419 | 3.7   |
| chr17 | 62536130 | 62537266 | 4.04  |
| chr17 | 62539878 | 62541437 | 4.04  |
| chr17 | 62579092 | 62579906 | 3.36  |
| chr17 | 62592476 | 62593431 | 3.36  |
| chr17 | 62613460 | 62614622 | 4.37  |
| chr17 | 62620660 | 62621891 | 4.37  |
| chr17 | 62623342 | 62624860 | 3.36  |
| chr17 | 62626515 | 62628039 | 3.03  |
| chr17 | 62629286 | 62630151 | 3.36  |
| chr17 | 62631513 | 62633397 | 4.71  |
| chr17 | 62644759 | 62646675 | 4.71  |
| chr17 | 62651435 | 62652941 | 5.05  |
| chr17 | 62655973 | 62656845 | 3.36  |
| chr17 | 62657068 | 62659363 | 4.04  |
| chr17 | 62670547 | 62672088 | 4.37  |
| chr17 | 62675826 | 62676768 | 3.7   |
| chr17 | 62681511 | 62682423 | 3.36  |
| chr17 | 62692313 | 62693670 | 4.37  |
| chr17 | 62701272 | 62703518 | 3.7   |
| chr17 | 62704432 | 62705936 | 4.71  |
| chr17 | 62713659 | 62714555 | 3.7   |
| chr17 | 62728385 | 62729722 | 4.71  |
| chr17 | 62732281 | 62733134 | 4.04  |
| chr17 | 62761196 | 62762559 | 5.38  |
| chr17 | 62764556 | 62766081 | 5.05  |
| chr17 | 62768050 | 62768971 | 3.7   |
| chr17 | 62769352 | 62771227 | 4.04  |
| chr17 | 62772496 | 62774441 | 4.71  |
| chr17 | 62774979 | 62777439 | 5.72  |

|       |          |          |      |
|-------|----------|----------|------|
| chr17 | 62937443 | 62938699 | 4.37 |
| chr17 | 62970416 | 62972635 | 4.71 |
| chr17 | 62980801 | 62982254 | 7.06 |
| chr17 | 62987662 | 62989005 | 4.04 |
| chr17 | 63002952 | 63003976 | 4.04 |
| chr17 | 63007890 | 63009405 | 3.03 |
| chr17 | 63013567 | 63014885 | 3.7  |
| chr17 | 63017196 | 63019856 | 4.71 |
| chr17 | 63023029 | 63025729 | 5.72 |
| chr17 | 63048774 | 63054140 | 5.38 |
| chr17 | 63058142 | 63061191 | 5.05 |
| chr17 | 63070177 | 63071653 | 4.04 |
| chr17 | 63074193 | 63075172 | 3.36 |
| chr17 | 63078477 | 63079554 | 4.71 |
| chr17 | 63084833 | 63086330 | 3.7  |
| chr17 | 63094912 | 63096941 | 4.04 |
| chr17 | 63097762 | 63099183 | 2.02 |
| chr17 | 63099948 | 63100986 | 4.04 |
| chr17 | 63102343 | 63103449 | 3.36 |
| chr17 | 63118640 | 63120708 | 4.04 |
| chr17 | 63127481 | 63128624 | 3.7  |
| chr17 | 63133164 | 63134994 | 3.7  |
| chr17 | 63138283 | 63139770 | 3.03 |
| chr17 | 63145362 | 63146583 | 3.7  |
| chr17 | 63156156 | 63157081 | 3.7  |
| chr17 | 63167379 | 63168277 | 3.36 |
| chr17 | 63168761 | 63174085 | 4.04 |
| chr17 | 63175731 | 63176964 | 3.7  |
| chr17 | 63179988 | 63181466 | 3.7  |
| chr17 | 63182456 | 63183273 | 3.7  |
| chr17 | 63183999 | 63184809 | 4.04 |
| chr17 | 63185768 | 63186533 | 3.36 |
| chr17 | 63192762 | 63193850 | 4.04 |
| chr17 | 63194366 | 63195686 | 4.71 |
| chr17 | 63209695 | 63211155 | 3.7  |
| chr17 | 63212745 | 63215016 | 4.04 |
| chr17 | 63216426 | 63218551 | 6.05 |
| chr17 | 63222795 | 63228025 | 4.37 |
| chr17 | 63232227 | 63232996 | 3.7  |
| chr17 | 63249403 | 63251177 | 5.05 |
| chr17 | 63256680 | 63258858 | 3.36 |
| chr17 | 63260646 | 63262902 | 4.37 |
| chr17 | 63266981 | 63268323 | 4.04 |

|       |          |          |      |
|-------|----------|----------|------|
| chr17 | 63273060 | 63274041 | 4.37 |
| chr17 | 63276980 | 63278382 | 3.36 |
| chr17 | 63279058 | 63280971 | 3.7  |
| chr17 | 63288138 | 63289702 | 3.7  |
| chr17 | 63294073 | 63295451 | 4.71 |
| chr17 | 63298407 | 63299704 | 4.71 |
| chr17 | 63300868 | 63302910 | 5.38 |
| chr17 | 63308697 | 63309882 | 4.04 |
| chr17 | 63312206 | 63313184 | 4.04 |
| chr17 | 63316522 | 63317915 | 6.05 |
| chr17 | 63320561 | 63323658 | 4.37 |
| chr17 | 63324068 | 63325552 | 4.04 |
| chr17 | 63334220 | 63337723 | 4.37 |
| chr17 | 63340216 | 63341192 | 4.37 |
| chr17 | 63342699 | 63343998 | 5.38 |
| chr17 | 63354670 | 63356109 | 3.7  |
| chr17 | 63358983 | 63362871 | 4.04 |
| chr17 | 63367518 | 63368671 | 3.7  |
| chr17 | 63370718 | 63371746 | 4.04 |
| chr17 | 63374972 | 63378153 | 4.71 |
| chr17 | 63379971 | 63381409 | 3.36 |
| chr17 | 63384875 | 63386267 | 3.36 |
| chr17 | 63402110 | 63403551 | 5.05 |
| chr17 | 63412722 | 63415539 | 3.7  |
| chr17 | 63425804 | 63427148 | 3.36 |
| chr17 | 63436148 | 63437280 | 4.04 |
| chr17 | 63442457 | 63443765 | 4.37 |
| chr17 | 63445084 | 63446628 | 4.71 |
| chr17 | 63451261 | 63453562 | 4.04 |
| chr17 | 63454358 | 63457497 | 6.39 |
| chr17 | 63459880 | 63461000 | 3.03 |
| chr17 | 63461600 | 63463652 | 4.04 |
| chr17 | 63470733 | 63471970 | 4.37 |
| chr17 | 63481230 | 63482351 | 5.05 |
| chr17 | 63486689 | 63489230 | 4.04 |
| chr17 | 63496475 | 63497420 | 3.7  |
| chr17 | 63501625 | 63502749 | 4.37 |
| chr17 | 63509957 | 63513976 | 4.04 |
| chr17 | 63526751 | 63529058 | 5.05 |
| chr17 | 63529962 | 63530844 | 3.36 |
| chr17 | 63537946 | 63540305 | 4.71 |
| chr17 | 63542699 | 63544488 | 4.37 |
| chr17 | 63555112 | 63559889 | 3.7  |

|       |          |          |       |
|-------|----------|----------|-------|
| chr17 | 63560723 | 63562026 | 4.04  |
| chr17 | 63573086 | 63573914 | 4.37  |
| chr17 | 63580243 | 63584952 | 4.71  |
| chr17 | 63586799 | 63587666 | 3.36  |
| chr17 | 63594664 | 63598090 | 4.37  |
| chr17 | 63605097 | 63606846 | 5.05  |
| chr17 | 63614983 | 63616059 | 3.03  |
| chr17 | 63621244 | 63622323 | 3.03  |
| chr17 | 63623756 | 63626406 | 4.37  |
| chr17 | 63628170 | 63632740 | 5.05  |
| chr17 | 63633276 | 63635558 | 4.04  |
| chr17 | 63636285 | 63637782 | 3.7   |
| chr17 | 63639164 | 63643402 | 12.45 |
| chr17 | 63651989 | 63654506 | 5.05  |
| chr17 | 63655231 | 63656538 | 3.7   |
| chr17 | 63658503 | 63661338 | 5.38  |
| chr17 | 63680185 | 63681035 | 3.7   |
| chr17 | 63686886 | 63688102 | 3.7   |
| chr17 | 63690882 | 63692025 | 3.36  |
| chr17 | 63692248 | 63693298 | 4.37  |
| chr17 | 63696549 | 63697997 | 4.04  |
| chr17 | 63703923 | 63705427 | 3.36  |
| chr17 | 63707341 | 63708739 | 3.7   |
| chr17 | 63716356 | 63717212 | 3.03  |
| chr17 | 63718497 | 63720635 | 4.37  |
| chr17 | 63723205 | 63724948 | 4.04  |
| chr17 | 63731371 | 63736688 | 4.71  |
| chr17 | 63738172 | 63739751 | 3.36  |
| chr17 | 63744019 | 63745475 | 3.7   |
| chr17 | 63752852 | 63754737 | 3.7   |
| chr17 | 63768638 | 63770818 | 4.04  |
| chr17 | 63775432 | 63776242 | 3.36  |
| chr17 | 63779442 | 63782789 | 5.05  |
| chr17 | 63784600 | 63786997 | 5.38  |
| chr17 | 63789983 | 63791284 | 4.71  |
| chr17 | 63791743 | 63794876 | 4.71  |
| chr17 | 63795238 | 63806084 | 9.75  |
| chr17 | 63810201 | 63812333 | 4.04  |
| chr17 | 63821503 | 63822367 | 3.36  |
| chr17 | 63825946 | 63830140 | 4.71  |
| chr17 | 63830477 | 63832987 | 4.37  |
| chr17 | 63834171 | 63837064 | 6.39  |
| chr17 | 63839814 | 63840749 | 3.7   |

|       |          |          |      |
|-------|----------|----------|------|
| chr17 | 63850941 | 63852308 | 4.71 |
| chr17 | 63856359 | 63857113 | 2.35 |
| chr17 | 63862871 | 63863804 | 3.7  |
| chr17 | 63873188 | 63876023 | 5.38 |
| chr17 | 63885311 | 63886277 | 3.7  |
| chr17 | 63896308 | 63898214 | 4.71 |
| chr17 | 63902330 | 63903879 | 6.73 |
| chr17 | 63904940 | 63908019 | 6.73 |
| chr17 | 63913237 | 63915659 | 4.04 |
| chr17 | 63927197 | 63929675 | 4.71 |
| chr17 | 63930915 | 63932943 | 3.7  |
| chr17 | 63935275 | 63936178 | 4.04 |
| chr17 | 63937047 | 63937855 | 3.7  |
| chr17 | 63941977 | 63942975 | 3.36 |
| chr17 | 63948401 | 63951083 | 3.7  |
| chr17 | 63952698 | 63955793 | 5.05 |
| chr17 | 63956635 | 63959136 | 4.71 |
| chr17 | 63961922 | 63962812 | 3.7  |
| chr17 | 63966302 | 63967636 | 4.04 |
| chr17 | 63983632 | 63985255 | 7.74 |
| chr17 | 63997332 | 63998409 | 4.04 |
| chr17 | 63999129 | 64000100 | 4.37 |
| chr17 | 64002782 | 64007580 | 5.72 |
| chr17 | 64009462 | 64013143 | 5.05 |
| chr17 | 64018840 | 64021210 | 4.71 |
| chr17 | 64061871 | 64063022 | 3.7  |
| chr17 | 64077968 | 64078826 | 3.03 |
| chr17 | 64079590 | 64080823 | 5.05 |
| chr17 | 64083011 | 64084922 | 3.36 |
| chr17 | 64086862 | 64087642 | 3.36 |
| chr17 | 64089211 | 64090363 | 4.04 |
| chr17 | 64099558 | 64101643 | 4.37 |
| chr17 | 64103274 | 64104615 | 5.38 |
| chr17 | 64109193 | 64111367 | 5.05 |
| chr17 | 64111650 | 64113070 | 4.04 |
| chr17 | 64119864 | 64121308 | 3.36 |
| chr17 | 64121698 | 64123169 | 4.04 |
| chr17 | 64133033 | 64134432 | 4.04 |
| chr17 | 64140783 | 64142185 | 3.36 |
| chr17 | 64143101 | 64143820 | 3.36 |
| chr17 | 64144706 | 64145489 | 4.04 |
| chr17 | 64157816 | 64160020 | 4.71 |
| chr17 | 64168310 | 64169171 | 3.7  |

|       |          |          |      |
|-------|----------|----------|------|
| chr17 | 64172754 | 64173558 | 3.7  |
| chr17 | 64187324 | 64188658 | 3.36 |
| chr17 | 64196269 | 64197273 | 4.37 |
| chr17 | 64204169 | 64205541 | 5.05 |
| chr17 | 64208656 | 64209945 | 4.37 |
| chr17 | 64210749 | 64211580 | 3.7  |
| chr17 | 64219745 | 64220595 | 2.69 |
| chr17 | 64253213 | 64256460 | 4.37 |
| chr17 | 64260101 | 64261039 | 4.37 |
| chr17 | 64267213 | 64268220 | 3.7  |
| chr17 | 64271560 | 64272506 | 4.37 |
| chr17 | 64294966 | 64296715 | 3.36 |
| chr17 | 64297357 | 64301321 | 4.04 |
| chr17 | 64304724 | 64305641 | 3.36 |
| chr17 | 64316708 | 64319882 | 4.71 |
| chr17 | 64337209 | 64338360 | 4.04 |
| chr17 | 64343270 | 64345143 | 4.04 |
| chr17 | 64346769 | 64350438 | 4.04 |
| chr17 | 64351073 | 64352327 | 3.7  |
| chr17 | 64355574 | 64357176 | 3.36 |
| chr17 | 64360014 | 64361844 | 3.7  |
| chr17 | 64368168 | 64370061 | 4.71 |
| chr17 | 64391063 | 64392086 | 3.36 |
| chr17 | 64395152 | 64397418 | 4.37 |
| chr17 | 64406431 | 64408048 | 3.7  |
| chr17 | 64413120 | 64414601 | 4.37 |
| chr17 | 64419266 | 64420273 | 3.7  |
| chr17 | 64422252 | 64423145 | 4.04 |
| chr17 | 64427194 | 64428903 | 4.04 |
| chr17 | 64435403 | 64436680 | 4.04 |
| chr17 | 64438713 | 64439619 | 3.7  |
| chr17 | 64447247 | 64449099 | 4.71 |
| chr17 | 64451308 | 64454541 | 4.71 |
| chr17 | 64455299 | 64456705 | 4.37 |
| chr17 | 64458263 | 64463225 | 4.71 |
| chr17 | 64468244 | 64469104 | 3.36 |
| chr17 | 64470238 | 64471714 | 3.7  |
| chr17 | 64478151 | 64479906 | 4.04 |
| chr17 | 64482835 | 64483949 | 4.37 |
| chr17 | 64487621 | 64488575 | 3.36 |
| chr17 | 64498607 | 64500516 | 5.05 |
| chr17 | 64502232 | 64506290 | 4.71 |
| chr17 | 64512476 | 64513851 | 4.37 |

|       |          |          |      |
|-------|----------|----------|------|
| chr17 | 64537832 | 64539261 | 3.36 |
| chr17 | 64541363 | 64542677 | 4.37 |
| chr17 | 64561632 | 64565026 | 4.37 |
| chr17 | 64573357 | 64574205 | 3.7  |
| chr17 | 64579341 | 64580554 | 3.7  |
| chr17 | 64581687 | 64583136 | 3.7  |
| chr17 | 64587097 | 64588349 | 4.04 |
| chr17 | 64602464 | 64604078 | 3.36 |
| chr17 | 64607342 | 64608318 | 3.7  |
| chr17 | 64617366 | 64618853 | 3.03 |
| chr17 | 64629932 | 64630948 | 3.7  |
| chr17 | 64632606 | 64633675 | 3.03 |
| chr17 | 64651860 | 64653659 | 4.04 |
| chr17 | 64657028 | 64658805 | 5.05 |
| chr17 | 64660239 | 64661634 | 3.7  |
| chr17 | 64663278 | 64664695 | 4.04 |
| chr17 | 64669414 | 64671586 | 3.7  |
| chr17 | 64671788 | 64673719 | 6.73 |
| chr17 | 64674067 | 64675656 | 3.7  |
| chr17 | 64677240 | 64678648 | 4.71 |
| chr17 | 64680957 | 64683525 | 3.7  |
| chr17 | 64690069 | 64692431 | 4.04 |
| chr17 | 64693627 | 64695134 | 5.05 |
| chr17 | 64707480 | 64708408 | 3.7  |
| chr17 | 64711532 | 64712607 | 4.04 |
| chr17 | 64713378 | 64714647 | 5.05 |
| chr17 | 64715818 | 64716830 | 3.7  |
| chr17 | 64718030 | 64719615 | 3.36 |
| chr17 | 64724651 | 64725681 | 3.36 |
| chr17 | 64731641 | 64732531 | 3.7  |
| chr17 | 64741823 | 64742739 | 3.36 |
| chr17 | 64747131 | 64748250 | 4.04 |
| chr17 | 64760707 | 64761456 | 2.69 |
| chr17 | 64764256 | 64767261 | 5.38 |
| chr17 | 64779425 | 64781098 | 3.7  |
| chr17 | 64792551 | 64794140 | 3.36 |
| chr17 | 64796587 | 64798020 | 4.37 |
| chr17 | 64801708 | 64802680 | 3.36 |
| chr17 | 64803743 | 64804514 | 3.7  |
| chr17 | 64804946 | 64806899 | 4.04 |
| chr17 | 64807271 | 64810166 | 4.04 |
| chr17 | 64813362 | 64814870 | 3.7  |
| chr17 | 64815230 | 64818649 | 4.37 |

|       |          |          |      |
|-------|----------|----------|------|
| chr17 | 64825296 | 64826097 | 3.03 |
| chr17 | 64833940 | 64834791 | 2.69 |
| chr17 | 64844189 | 64845030 | 3.36 |
| chr17 | 64847380 | 64848382 | 3.7  |
| chr17 | 64850691 | 64851950 | 5.38 |
| chr17 | 64855176 | 64856249 | 2.35 |
| chr17 | 64871228 | 64872723 | 3.36 |
| chr17 | 64873123 | 64874345 | 3.7  |
| chr17 | 64874576 | 64878492 | 4.71 |
| chr17 | 64880208 | 64881081 | 3.36 |
| chr17 | 64882360 | 64883617 | 4.37 |
| chr17 | 64887758 | 64888921 | 4.04 |
| chr17 | 64890702 | 64892048 | 4.71 |
| chr17 | 64895469 | 64896926 | 4.04 |
| chr17 | 64900641 | 64903519 | 5.05 |
| chr17 | 64910023 | 64913797 | 6.73 |
| chr17 | 64916200 | 64919226 | 6.39 |
| chr17 | 64919915 | 64920879 | 3.36 |
| chr17 | 64926514 | 64928016 | 4.04 |
| chr17 | 64929091 | 64930558 | 3.7  |
| chr17 | 64930850 | 64936778 | 5.05 |
| chr17 | 64939385 | 64944869 | 4.71 |
| chr17 | 64945481 | 64951636 | 7.74 |
| chr17 | 64952945 | 64954742 | 3.36 |
| chr17 | 64955767 | 64957596 | 4.04 |
| chr17 | 64958791 | 64963042 | 7.4  |
| chr17 | 64963782 | 64964621 | 3.03 |
| chr17 | 64965152 | 64966483 | 4.04 |
| chr17 | 64972692 | 64973584 | 3.36 |
| chr17 | 64976033 | 64977979 | 4.04 |
| chr17 | 64990746 | 64991718 | 3.36 |
| chr17 | 64994468 | 64995645 | 4.37 |
| chr17 | 64995967 | 64998239 | 4.04 |
| chr17 | 65006218 | 65006934 | 3.7  |
| chr17 | 65014092 | 65016806 | 3.7  |
| chr17 | 65028734 | 65031333 | 3.7  |
| chr17 | 65042006 | 65048494 | 7.74 |
| chr17 | 65056203 | 65058249 | 4.71 |
| chr17 | 65067226 | 65068102 | 3.36 |
| chr17 | 65083882 | 65084792 | 3.36 |
| chr17 | 65139204 | 65140389 | 4.37 |
| chr17 | 65142747 | 65143714 | 4.04 |
| chr17 | 65170986 | 65172634 | 3.7  |



|       |          |          |      |
|-------|----------|----------|------|
| chr17 | 65188323 | 65189034 | 2.35 |
| chr17 | 65190374 | 65191771 | 4.04 |
| chr17 | 65199448 | 65200306 | 3.7  |
| chr17 | 65211656 | 65212704 | 3.7  |
| chr17 | 65213118 | 65214084 | 3.7  |
| chr17 | 65214334 | 65215571 | 3.03 |
| chr17 | 65240331 | 65243824 | 5.38 |
| chr17 | 65251512 | 65253007 | 3.36 |
| chr17 | 65258105 | 65259204 | 3.7  |
| chr17 | 65268279 | 65269636 | 5.72 |
| chr17 | 65277800 | 65278824 | 4.37 |
| chr17 | 65303962 | 65304954 | 3.36 |
| chr17 | 65350133 | 65351109 | 4.04 |
| chr17 | 65353053 | 65354212 | 4.04 |
| chr17 | 65355621 | 65356882 | 5.05 |
| chr17 | 65361812 | 65363264 | 4.37 |
| chr17 | 65370372 | 65371392 | 3.7  |
| chr17 | 65372123 | 65376002 | 6.73 |
| chr17 | 65386011 | 65388676 | 5.05 |
| chr17 | 65390868 | 65392091 | 4.71 |
| chr17 | 65394390 | 65395216 | 3.36 |
| chr17 | 65395736 | 65396893 | 4.04 |
| chr17 | 65397839 | 65398822 | 3.7  |
| chr17 | 65401980 | 65403833 | 3.7  |
| chr17 | 65408980 | 65410960 | 4.04 |
| chr17 | 65412065 | 65413031 | 4.04 |
| chr17 | 65416505 | 65418565 | 4.04 |
| chr17 | 65419588 | 65420348 | 3.36 |
| chr17 | 65427493 | 65429695 | 6.05 |
| chr17 | 65451855 | 65453148 | 3.7  |
| chr17 | 65454028 | 65458561 | 4.37 |
| chr17 | 65461026 | 65462301 | 3.7  |
| chr17 | 65463467 | 65464690 | 4.37 |
| chr17 | 65470511 | 65472290 | 4.04 |
| chr17 | 65486409 | 65489319 | 4.37 |
| chr17 | 65491602 | 65493034 | 4.37 |
| chr17 | 65495656 | 65496910 | 4.71 |
| chr17 | 65505638 | 65507606 | 4.04 |
| chr17 | 65511115 | 65511900 | 3.36 |
| chr17 | 65512971 | 65518894 | 4.71 |
| chr17 | 65536240 | 65537096 | 2.35 |
| chr17 | 65567938 | 65568833 | 4.04 |
| chr17 | 65579971 | 65581653 | 4.04 |

|       |          |          |       |
|-------|----------|----------|-------|
| chr17 | 65582097 | 65582939 | 3.03  |
| chr17 | 65589703 | 65590542 | 4.37  |
| chr17 | 65597972 | 65598856 | 4.04  |
| chr17 | 65602134 | 65604072 | 5.05  |
| chr17 | 65605983 | 65606870 | 3.36  |
| chr17 | 65622444 | 65623935 | 4.04  |
| chr17 | 65632687 | 65635943 | 6.39  |
| chr17 | 65643698 | 65644837 | 3.7   |
| chr17 | 65651702 | 65656613 | 11.44 |
| chr17 | 65661559 | 65662423 | 4.04  |
| chr17 | 65667574 | 65668699 | 4.04  |
| chr17 | 65672427 | 65673355 | 4.04  |
| chr17 | 65674060 | 65675409 | 4.04  |
| chr17 | 65689530 | 65691772 | 5.05  |
| chr17 | 65692072 | 65692971 | 3.03  |
| chr17 | 65695921 | 65697332 | 3.7   |
| chr17 | 65713288 | 65715513 | 7.74  |
| chr17 | 65726653 | 65727504 | 3.36  |
| chr17 | 65745882 | 65747693 | 4.71  |
| chr17 | 65751767 | 65752901 | 4.37  |
| chr17 | 65772779 | 65773662 | 3.03  |
| chr17 | 65782872 | 65785013 | 4.04  |
| chr17 | 65791502 | 65792337 | 4.04  |
| chr17 | 65797953 | 65800023 | 4.04  |
| chr17 | 65813762 | 65815030 | 3.7   |
| chr17 | 65820954 | 65822704 | 7.4   |
| chr17 | 65824951 | 65826347 | 4.37  |
| chr17 | 65833739 | 65834711 | 4.04  |
| chr17 | 65858312 | 65860618 | 3.7   |
| chr17 | 65870109 | 65871032 | 2.35  |
| chr17 | 65873851 | 65874799 | 2.69  |
| chr17 | 65881736 | 65882853 | 3.7   |
| chr17 | 65886403 | 65888606 | 3.7   |
| chr17 | 65900387 | 65901201 | 4.04  |
| chr17 | 65917809 | 65918532 | 4.37  |
| chr17 | 65943640 | 65944718 | 3.36  |
| chr17 | 65954910 | 65955870 | 4.37  |
| chr17 | 65988785 | 65992738 | 6.05  |
| chr17 | 66015026 | 66017233 | 6.39  |
| chr17 | 66022038 | 66023430 | 4.71  |
| chr17 | 66031223 | 66033208 | 5.72  |
| chr17 | 66085724 | 66086846 | 4.04  |
| chr17 | 66097149 | 66099089 | 5.38  |

|       |          |          |       |
|-------|----------|----------|-------|
| chr17 | 66115745 | 66116807 | 4.04  |
| chr17 | 66118248 | 66120675 | 6.73  |
| chr17 | 66136609 | 66137875 | 4.37  |
| chr17 | 66166471 | 66167392 | 2.69  |
| chr17 | 66174773 | 66175950 | 4.04  |
| chr17 | 66180689 | 66182442 | 3.7   |
| chr17 | 66186086 | 66187338 | 4.71  |
| chr17 | 66191379 | 66195231 | 9.42  |
| chr17 | 66200873 | 66204973 | 5.05  |
| chr17 | 66236517 | 66237548 | 3.03  |
| chr17 | 66243312 | 66244466 | 3.36  |
| chr17 | 66273691 | 66274755 | 4.37  |
| chr17 | 66283277 | 66284230 | 3.7   |
| chr17 | 66285419 | 66291207 | 6.73  |
| chr17 | 66291988 | 66293911 | 4.37  |
| chr17 | 66297118 | 66301758 | 4.71  |
| chr17 | 66302691 | 66304059 | 4.37  |
| chr17 | 66306744 | 66307764 | 4.04  |
| chr17 | 66319733 | 66331125 | 16.15 |
| chr17 | 66335248 | 66336746 | 5.05  |
| chr17 | 66336975 | 66337797 | 4.04  |
| chr17 | 66338388 | 66339387 | 4.04  |
| chr17 | 66344695 | 66345889 | 3.7   |
| chr17 | 66370929 | 66372261 | 3.7   |
| chr17 | 66373315 | 66375578 | 7.06  |
| chr17 | 66376950 | 66378320 | 4.37  |
| chr17 | 66378612 | 66380954 | 3.36  |
| chr17 | 66392961 | 66397342 | 4.71  |
| chr17 | 66400360 | 66403231 | 5.38  |
| chr17 | 66419018 | 66419947 | 3.7   |
| chr17 | 66420874 | 66422448 | 4.04  |
| chr17 | 66431202 | 66433102 | 4.71  |
| chr17 | 66435245 | 66436702 | 3.7   |
| chr17 | 66444655 | 66445616 | 3.7   |
| chr17 | 66449987 | 66451258 | 5.05  |
| chr17 | 66452291 | 66454781 | 5.38  |
| chr17 | 66458335 | 66459776 | 4.71  |
| chr17 | 66461480 | 66462547 | 3.36  |
| chr17 | 66476706 | 66477588 | 3.36  |
| chr17 | 66481076 | 66481915 | 3.36  |
| chr17 | 66487572 | 66489004 | 4.37  |
| chr17 | 66490511 | 66491972 | 3.7   |
| chr17 | 66493007 | 66495789 | 4.37  |

|       |          |          |      |
|-------|----------|----------|------|
| chr17 | 66497913 | 66499542 | 4.37 |
| chr17 | 66506959 | 66511990 | 5.38 |
| chr17 | 66513657 | 66515141 | 4.37 |
| chr17 | 66518848 | 66520227 | 3.7  |
| chr17 | 66533288 | 66534892 | 3.36 |
| chr17 | 66535575 | 66537053 | 3.7  |
| chr17 | 66537679 | 66539877 | 3.7  |
| chr17 | 66546905 | 66547831 | 4.04 |
| chr17 | 66550919 | 66553203 | 4.37 |
| chr17 | 66553407 | 66554930 | 4.71 |
| chr17 | 66555209 | 66556552 | 4.04 |
| chr17 | 66564605 | 66565928 | 4.04 |
| chr17 | 66573170 | 66574883 | 3.7  |
| chr17 | 66576052 | 66577611 | 3.7  |
| chr17 | 66583369 | 66587420 | 4.37 |
| chr17 | 66588668 | 66589754 | 3.36 |
| chr17 | 66601030 | 66602639 | 5.05 |
| chr17 | 66603056 | 66607345 | 8.75 |
| chr17 | 66607639 | 66608454 | 4.71 |
| chr17 | 66610858 | 66611927 | 3.7  |
| chr17 | 66612271 | 66613880 | 4.04 |
| chr17 | 66614384 | 66617002 | 5.72 |
| chr17 | 66630274 | 66631533 | 4.04 |
| chr17 | 66643105 | 66644168 | 3.03 |
| chr17 | 66670516 | 66672142 | 3.36 |
| chr17 | 66678720 | 66679799 | 4.04 |
| chr17 | 66686860 | 66688118 | 3.03 |
| chr17 | 66693857 | 66694850 | 3.03 |
| chr17 | 66695346 | 66697232 | 4.37 |
| chr17 | 66702436 | 66703844 | 4.04 |
| chr17 | 66706660 | 66709007 | 4.04 |
| chr17 | 66712580 | 66713582 | 3.36 |
| chr17 | 66717580 | 66718964 | 4.37 |
| chr17 | 66720782 | 66724400 | 3.7  |
| chr17 | 66725819 | 66727301 | 3.03 |
| chr17 | 66728119 | 66731996 | 5.38 |
| chr17 | 66734111 | 66735745 | 3.7  |
| chr17 | 66741779 | 66742679 | 3.7  |
| chr17 | 66745281 | 66748344 | 4.37 |
| chr17 | 66755390 | 66756857 | 4.71 |
| chr17 | 66788034 | 66789174 | 3.7  |
| chr17 | 66801262 | 66802223 | 3.7  |
| chr17 | 66803934 | 66805673 | 4.04 |

|       |          |          |      |
|-------|----------|----------|------|
| chr17 | 66826320 | 66828129 | 4.04 |
| chr17 | 66843005 | 66843861 | 3.03 |
| chr17 | 66845166 | 66846047 | 3.36 |
| chr17 | 66846838 | 66848494 | 3.7  |
| chr17 | 66851978 | 66853219 | 4.71 |
| chr17 | 66853505 | 66854880 | 4.04 |
| chr17 | 66869067 | 66870560 | 3.7  |
| chr17 | 66873316 | 66878510 | 6.05 |
| chr17 | 66890535 | 66891534 | 3.36 |
| chr17 | 66901994 | 66902952 | 3.36 |
| chr17 | 66906893 | 66908166 | 3.36 |
| chr17 | 66912346 | 66913224 | 4.04 |
| chr17 | 66921462 | 66922311 | 3.7  |
| chr17 | 66925293 | 66926753 | 4.04 |
| chr17 | 66978683 | 66979642 | 4.04 |
| chr17 | 66979989 | 66981382 | 4.04 |
| chr17 | 66982142 | 66983469 | 3.7  |
| chr17 | 67012152 | 67013304 | 4.04 |
| chr17 | 67045465 | 67046318 | 3.36 |
| chr17 | 67077117 | 67080852 | 4.37 |
| chr17 | 67107850 | 67109411 | 3.03 |
| chr17 | 67115265 | 67116326 | 4.37 |
| chr17 | 67146193 | 67147224 | 3.36 |
| chr17 | 67161703 | 67162602 | 3.7  |
| chr17 | 67208671 | 67210081 | 3.36 |
| chr17 | 67216126 | 67217392 | 4.04 |
| chr17 | 67226292 | 67227572 | 4.04 |
| chr17 | 67227782 | 67229395 | 4.37 |
| chr17 | 67230924 | 67232237 | 4.04 |
| chr17 | 67264822 | 67266163 | 4.04 |
| chr17 | 67268143 | 67269160 | 4.04 |
| chr17 | 67272953 | 67274450 | 3.36 |
| chr17 | 67288624 | 67289401 | 4.04 |
| chr17 | 67310458 | 67311657 | 4.37 |
| chr17 | 67321310 | 67324307 | 5.38 |
| chr17 | 67328318 | 67329417 | 5.05 |
| chr17 | 67330759 | 67332580 | 4.37 |
| chr17 | 67335421 | 67336245 | 3.03 |
| chr17 | 67336610 | 67337772 | 4.04 |
| chr17 | 67694023 | 67695304 | 4.71 |
| chr17 | 69263231 | 69264227 | 1.68 |
| chr17 | 70179089 | 70180198 | 3.7  |
| chr17 | 70872049 | 70873490 | 3.7  |

|       |          |          |      |
|-------|----------|----------|------|
| chr17 | 70875415 | 70876918 | 5.72 |
| chr17 | 71956166 | 71957391 | 4.04 |
| chr17 | 72138700 | 72140204 | 5.05 |
| chr17 | 72199414 | 72200173 | 4.04 |
| chr17 | 72426968 | 72428687 | 3.36 |
| chr17 | 72666813 | 72668181 | 2.35 |
| chr17 | 73008030 | 73009380 | 4.71 |
| chr17 | 73029869 | 73030981 | 4.04 |
| chr17 | 73284062 | 73286719 | 4.71 |
| chr17 | 73296741 | 73297828 | 4.71 |
| chr17 | 73303885 | 73306197 | 5.38 |
| chr17 | 73315701 | 73316626 | 4.37 |
| chr17 | 73321796 | 73322862 | 3.36 |
| chr17 | 73329324 | 73330431 | 6.05 |
| chr17 | 73331332 | 73332357 | 3.7  |
| chr17 | 73348023 | 73348999 | 4.37 |
| chr17 | 73349961 | 73352240 | 4.04 |
| chr17 | 73355873 | 73357795 | 5.38 |
| chr17 | 73358041 | 73359232 | 4.37 |
| chr17 | 73360426 | 73364199 | 5.38 |
| chr17 | 73365795 | 73367437 | 4.71 |
| chr17 | 73378634 | 73379922 | 5.05 |
| chr17 | 73383538 | 73385415 | 5.05 |
| chr17 | 73387785 | 73388807 | 3.7  |
| chr17 | 73389144 | 73392813 | 7.06 |
| chr17 | 73400071 | 73403225 | 5.05 |
| chr17 | 73404841 | 73405820 | 4.71 |
| chr17 | 73408210 | 73409510 | 5.05 |
| chr17 | 73414092 | 73415180 | 3.7  |
| chr17 | 73421898 | 73423055 | 4.04 |
| chr17 | 73426178 | 73427073 | 5.05 |
| chr17 | 73443104 | 73445016 | 4.37 |
| chr17 | 73449897 | 73450908 | 4.37 |
| chr17 | 73451448 | 73454725 | 4.71 |
| chr17 | 73454974 | 73457094 | 5.38 |
| chr17 | 73459221 | 73460829 | 4.37 |
| chr17 | 73467632 | 73469582 | 5.05 |
| chr17 | 73471883 | 73473002 | 3.03 |
| chr17 | 73475512 | 73477812 | 5.05 |
| chr17 | 73480601 | 73481534 | 4.04 |
| chr17 | 73482956 | 73484592 | 3.7  |
| chr17 | 73486122 | 73486944 | 3.7  |
| chr17 | 73488860 | 73490344 | 4.37 |

|       |          |          |      |
|-------|----------|----------|------|
| chr17 | 73491648 | 73493257 | 3.7  |
| chr17 | 73493572 | 73494375 | 3.7  |
| chr17 | 73496946 | 73498550 | 3.36 |
| chr17 | 73499578 | 73500949 | 3.7  |
| chr17 | 73509878 | 73514772 | 7.74 |
| chr17 | 73519737 | 73524033 | 6.05 |
| chr17 | 73530820 | 73531723 | 4.04 |
| chr17 | 73537907 | 73540547 | 3.7  |
| chr17 | 73544607 | 73546684 | 6.73 |
| chr17 | 73548381 | 73549397 | 3.36 |
| chr17 | 73552062 | 73556749 | 9.08 |
| chr17 | 73560534 | 73562963 | 5.38 |
| chr17 | 73566325 | 73568173 | 4.04 |
| chr17 | 73568732 | 73572812 | 5.38 |
| chr17 | 73574070 | 73575504 | 5.05 |
| chr17 | 73580177 | 73581138 | 3.7  |
| chr17 | 73581652 | 73582659 | 3.7  |
| chr17 | 73583791 | 73585899 | 3.7  |
| chr17 | 73587719 | 73589605 | 3.7  |
| chr17 | 73591346 | 73593526 | 5.05 |
| chr17 | 73597165 | 73599489 | 4.37 |
| chr17 | 73606124 | 73607497 | 3.7  |
| chr17 | 73608860 | 73610397 | 3.36 |
| chr17 | 73612769 | 73613585 | 3.36 |
| chr17 | 73617252 | 73619000 | 4.04 |
| chr17 | 73619776 | 73622685 | 3.36 |
| chr17 | 73628233 | 73631744 | 4.71 |
| chr17 | 73634995 | 73640111 | 7.74 |
| chr17 | 73640981 | 73642991 | 4.71 |
| chr17 | 73648266 | 73649775 | 3.7  |
| chr17 | 73656896 | 73657766 | 4.37 |
| chr17 | 73662548 | 73664875 | 5.38 |
| chr17 | 73666292 | 73667434 | 2.69 |
| chr17 | 73675181 | 73676706 | 5.38 |
| chr17 | 73677027 | 73677846 | 3.03 |
| chr17 | 73683911 | 73685137 | 5.05 |
| chr17 | 73686120 | 73687333 | 2.69 |
| chr17 | 73692978 | 73694565 | 4.04 |
| chr17 | 73695656 | 73697164 | 3.7  |
| chr17 | 73716767 | 73721141 | 6.73 |
| chr17 | 73735587 | 73737005 | 3.7  |
| chr17 | 73743377 | 73744465 | 5.05 |
| chr17 | 73744715 | 73745462 | 3.7  |

|       |          |          |       |
|-------|----------|----------|-------|
| chr17 | 73746304 | 73747768 | 4.71  |
| chr17 | 73753291 | 73756327 | 4.04  |
| chr17 | 73758094 | 73759033 | 3.7   |
| chr17 | 73759530 | 73761962 | 4.04  |
| chr17 | 73764976 | 73766460 | 4.04  |
| chr17 | 73767121 | 73770223 | 5.38  |
| chr17 | 73770713 | 73776969 | 5.05  |
| chr17 | 73777260 | 73783684 | 6.39  |
| chr17 | 73788702 | 73790106 | 3.7   |
| chr17 | 73790652 | 73792155 | 3.7   |
| chr17 | 73803457 | 73807363 | 5.38  |
| chr17 | 73808998 | 73810388 | 4.04  |
| chr17 | 73814838 | 73816914 | 3.7   |
| chr17 | 75163305 | 75164736 | 9.08  |
| chr17 | 75170135 | 75171766 | 12.45 |
| chr17 | 75265663 | 75266811 | 3.36  |
| chr17 | 75282196 | 75284172 | 5.38  |
| chr17 | 75473274 | 75474347 | 4.71  |
| chr17 | 75737263 | 75737870 | 1.68  |
| chr17 | 76850686 | 76851438 | 1.68  |
| chr17 | 76946526 | 76947873 | 5.05  |
| chr17 | 77009397 | 77013564 | 4.71  |
| chr17 | 77966197 | 77967800 | 4.04  |
| chr17 | 78128774 | 78130691 | 8.75  |
| chr17 | 79010872 | 79012048 | 6.39  |
| chr17 | 80055569 | 80056735 | 3.03  |
| chr17 | 80061487 | 80062481 | 6.73  |
| chr17 | 80163612 | 80164486 | 3.36  |
| chr17 | 80298178 | 80299468 | 6.05  |
| chr17 | 80594418 | 80595366 | 5.72  |
| chr17 | 80652120 | 80653233 | 7.4   |
| chr17 | 80690864 | 80691998 | 4.71  |
| chr17 | 80794765 | 80795905 | 1.35  |
| chr17 | 80920298 | 80921781 | 6.05  |
| chr17 | 80924342 | 80925621 | 4.04  |
| chr17 | 80927894 | 80929368 | 3.7   |
| chr17 | 80940949 | 80941839 | 3.7   |
| chr17 | 80943637 | 80944541 | 3.7   |
| chr17 | 80947429 | 80952767 | 6.73  |
| chr17 | 80955003 | 80956161 | 5.38  |
| chr17 | 80970052 | 80971237 | 3.7   |
| chr17 | 80971693 | 80972577 | 4.37  |
| chr17 | 80986811 | 80988237 | 4.37  |



|       |          |          |      |
|-------|----------|----------|------|
| chr17 | 80997312 | 81002370 | 8.41 |
| chr17 | 81007475 | 81010168 | 5.72 |
| chr17 | 81010863 | 81012287 | 5.38 |
| chr17 | 81015615 | 81016455 | 4.37 |
| chr17 | 81017658 | 81018776 | 3.36 |
| chr17 | 81022100 | 81024276 | 6.05 |
| chr17 | 81028356 | 81029982 | 4.37 |
| chr17 | 81030941 | 81034924 | 4.71 |
| chr17 | 81035915 | 81037194 | 4.04 |
| chr17 | 81037620 | 81038834 | 4.04 |
| chr17 | 81040897 | 81043316 | 4.71 |
| chr17 | 81043906 | 81045279 | 5.05 |
| chr17 | 81046496 | 81050274 | 6.05 |
| chr17 | 81051059 | 81053789 | 5.72 |
| chr17 | 81054225 | 81058409 | 6.05 |
| chr17 | 81058789 | 81061634 | 4.71 |
| chr17 | 81063048 | 81064444 | 3.36 |
| chr17 | 81064919 | 81069124 | 5.05 |
| chr17 | 81069692 | 81070913 | 4.71 |
| chr17 | 81080722 | 81082016 | 3.36 |
| chr17 | 81083735 | 81087560 | 3.7  |
| chr17 | 81088646 | 81095349 | 7.74 |
| chr17 | 81097402 | 81098200 | 3.03 |
| chr17 | 81102542 | 81104189 | 4.37 |
| chr17 | 81151113 | 81152260 | 3.36 |
| chr16 | 121221   | 122251   | 4.37 |
| chr16 | 717410   | 718372   | 5.72 |
| chr16 | 770991   | 772036   | 3.03 |
| chr16 | 790234   | 791607   | 3.7  |
| chr16 | 886017   | 886983   | 3.03 |
| chr16 | 1075008  | 1075963  | 2.69 |
| chr16 | 1134446  | 1136362  | 4.37 |
| chr16 | 1471953  | 1472993  | 5.05 |
| chr16 | 2299723  | 2302333  | 4.37 |
| chr16 | 2571117  | 2571907  | 4.37 |
| chr16 | 2652952  | 2653999  | 4.04 |
| chr16 | 2731905  | 2733150  | 5.05 |
| chr16 | 2802594  | 2803735  | 4.37 |
| chr16 | 2904160  | 2905360  | 3.36 |
| chr16 | 2906986  | 2908743  | 4.71 |
| chr16 | 2910491  | 2912026  | 4.04 |
| chr16 | 2917942  | 2918846  | 3.03 |
| chr16 | 2929286  | 2931004  | 8.75 |

|       |          |          |       |
|-------|----------|----------|-------|
| chr16 | 3162014  | 3163226  | 5.38  |
| chr16 | 3198911  | 3201389  | 4.71  |
| chr16 | 3201818  | 3203486  | 3.7   |
| chr16 | 3224127  | 3225534  | 3.7   |
| chr16 | 3233186  | 3234191  | 3.7   |
| chr16 | 3240796  | 3242121  | 4.04  |
| chr16 | 3255546  | 3256902  | 7.06  |
| chr16 | 3271165  | 3276605  | 16.82 |
| chr16 | 3332480  | 3333945  | 3.36  |
| chr16 | 3335510  | 3337121  | 4.04  |
| chr16 | 3338106  | 3345552  | 10.09 |
| chr16 | 3345799  | 3351706  | 6.39  |
| chr16 | 3352866  | 3356468  | 5.05  |
| chr16 | 3356869  | 3359395  | 4.37  |
| chr16 | 3359606  | 3369639  | 14.8  |
| chr16 | 3371791  | 3372706  | 3.7   |
| chr16 | 3426519  | 3427791  | 4.37  |
| chr16 | 3429985  | 3435381  | 19.17 |
| chr16 | 3436997  | 3440917  | 5.72  |
| chr16 | 3441659  | 3442552  | 3.7   |
| chr16 | 3445819  | 3448780  | 4.71  |
| chr16 | 3450072  | 3452515  | 5.05  |
| chr16 | 3454754  | 3462122  | 16.82 |
| chr16 | 3462357  | 3464015  | 3.7   |
| chr16 | 3468393  | 3469800  | 4.71  |
| chr16 | 3489384  | 3490431  | 3.7   |
| chr16 | 3550448  | 3551531  | 4.37  |
| chr16 | 3969249  | 3970068  | 4.37  |
| chr16 | 4110422  | 4111217  | 4.04  |
| chr16 | 4202065  | 4202939  | 4.37  |
| chr16 | 4303549  | 4304494  | 4.37  |
| chr16 | 4322724  | 4323913  | 4.04  |
| chr16 | 4359069  | 4360078  | 3.7   |
| chr16 | 4364419  | 4365552  | 3.7   |
| chr16 | 4422880  | 4424189  | 3.03  |
| chr16 | 4588993  | 4590644  | 5.38  |
| chr16 | 4675025  | 4675945  | 3.7   |
| chr16 | 4986280  | 4987638  | 5.38  |
| chr16 | 8782813  | 8785003  | 9.08  |
| chr16 | 9106763  | 9107771  | 3.7   |
| chr16 | 9141112  | 9142359  | 4.04  |
| chr16 | 10321913 | 10323003 | 3.7   |
| chr16 | 10433258 | 10435200 | 10.09 |

|       |          |          |       |
|-------|----------|----------|-------|
| chr16 | 10436322 | 10437971 | 5.72  |
| chr16 | 10479259 | 10480449 | 4.37  |
| chr16 | 10502086 | 10503481 | 6.73  |
| chr16 | 10510681 | 10512014 | 4.37  |
| chr16 | 10535120 | 10536583 | 6.73  |
| chr16 | 10539930 | 10542261 | 12.78 |
| chr16 | 10642209 | 10643612 | 3.7   |
| chr16 | 10687961 | 10689317 | 5.05  |
| chr16 | 10710669 | 10712381 | 4.37  |
| chr16 | 11295815 | 11296733 | 2.02  |
| chr16 | 11312012 | 11313302 | 2.69  |
| chr16 | 11441030 | 11441902 | 3.36  |
| chr16 | 11578079 | 11578962 | 3.7   |
| chr16 | 11679386 | 11680355 | 3.7   |
| chr16 | 12896837 | 12898422 | 6.05  |
| chr16 | 12992930 | 12994134 | 5.05  |
| chr16 | 13352968 | 13353877 | 4.37  |
| chr16 | 13789990 | 13791860 | 4.37  |
| chr16 | 14107266 | 14108485 | 4.04  |
| chr16 | 14190444 | 14191882 | 3.7   |
| chr16 | 14379423 | 14380540 | 3.7   |
| chr16 | 14383077 | 14384337 | 7.4   |
| chr16 | 15050389 | 15051581 | 3.7   |
| chr16 | 16074730 | 16076247 | 7.74  |
| chr16 | 16176870 | 16177759 | 3.7   |
| chr16 | 16252641 | 16253443 | 1.68  |
| chr16 | 19019748 | 19020986 | 4.04  |
| chr16 | 19124752 | 19125628 | 3.7   |
| chr16 | 19427343 | 19428305 | 2.69  |
| chr16 | 20137300 | 20138661 | 5.38  |
| chr16 | 20758240 | 20759493 | 5.38  |
| chr16 | 20817364 | 20818540 | 4.04  |
| chr16 | 20911602 | 20913118 | 5.05  |
| chr16 | 21536367 | 21537702 | 4.37  |
| chr16 | 21576495 | 21577478 | 2.35  |
| chr16 | 21580623 | 21581627 | 4.71  |
| chr16 | 21589761 | 21591366 | 3.36  |
| chr16 | 22199495 | 22200587 | 4.71  |
| chr16 | 22308086 | 22309539 | 3.36  |
| chr16 | 22347547 | 22348321 | 3.36  |
| chr16 | 22632230 | 22633599 | 3.36  |
| chr16 | 22636706 | 22637681 | 4.71  |
| chr16 | 22651834 | 22652825 | 4.71  |

|       |          |          |      |
|-------|----------|----------|------|
| chr16 | 22656835 | 22658137 | 2.69 |
| chr16 | 22658967 | 22660414 | 3.36 |
| chr16 | 22661057 | 22661812 | 2.02 |
| chr16 | 22671502 | 22672362 | 4.04 |
| chr16 | 22673196 | 22674280 | 1.68 |
| chr16 | 22684218 | 22685313 | 3.36 |
| chr16 | 22685668 | 22686470 | 3.7  |
| chr16 | 22687506 | 22690357 | 4.37 |
| chr16 | 22698685 | 22699758 | 3.7  |
| chr16 | 22722851 | 22724622 | 5.38 |
| chr16 | 22994485 | 22995810 | 4.04 |
| chr16 | 24551551 | 24553247 | 3.36 |
| chr16 | 25012285 | 25013140 | 1.35 |
| chr16 | 25089500 | 25090661 | 4.37 |
| chr16 | 25269111 | 25270243 | 4.71 |
| chr16 | 25323017 | 25324158 | 5.72 |
| chr16 | 25422485 | 25423404 | 2.35 |
| chr16 | 27174556 | 27175366 | 4.37 |
| chr16 | 27374828 | 27376438 | 4.04 |
| chr16 | 27432561 | 27434553 | 9.75 |
| chr16 | 27966373 | 27967359 | 3.7  |
| chr16 | 28857340 | 28858149 | 3.36 |
| chr16 | 29910486 | 29911668 | 3.36 |
| chr16 | 29954625 | 29955858 | 4.04 |
| chr16 | 29990743 | 29992188 | 1.68 |
| chr16 | 30005860 | 30007620 | 4.37 |
| chr16 | 30032349 | 30033311 | 3.7  |
| chr16 | 30071814 | 30072738 | 4.04 |
| chr16 | 30076156 | 30077681 | 4.04 |
| chr16 | 30088810 | 30089809 | 2.35 |
| chr16 | 30103583 | 30104730 | 2.69 |
| chr16 | 30107299 | 30109870 | 7.4  |
| chr16 | 30160245 | 30161396 | 3.36 |
| chr16 | 30406201 | 30407423 | 4.37 |
| chr16 | 30418239 | 30419411 | 3.36 |
| chr16 | 30661478 | 30662710 | 3.7  |
| chr16 | 30710049 | 30710974 | 3.36 |
| chr16 | 30773323 | 30781343 | 5.05 |
| chr16 | 30782864 | 30783930 | 2.35 |
| chr16 | 30784676 | 30786976 | 4.71 |
| chr16 | 30816451 | 30817779 | 6.39 |
| chr16 | 30825219 | 30826131 | 3.36 |
| chr16 | 30867819 | 30868995 | 4.37 |

|       |          |          |       |
|-------|----------|----------|-------|
| chr16 | 30886043 | 30887448 | 3.7   |
| chr16 | 30968091 | 30969596 | 3.7   |
| chr16 | 31084497 | 31085681 | 3.36  |
| chr16 | 31153571 | 31154626 | 4.04  |
| chr16 | 31519094 | 31520438 | 5.05  |
| chr16 | 31588431 | 31590218 | 4.71  |
| chr16 | 31612203 | 31614574 | 7.06  |
| chr16 | 31752331 | 31753954 | 3.36  |
| chr16 | 31760348 | 31769302 | 13.12 |
| chr16 | 31774496 | 31775810 | 3.7   |
| chr16 | 31778593 | 31779823 | 4.04  |
| chr16 | 31784205 | 31785075 | 3.7   |
| chr16 | 31791223 | 31792578 | 4.37  |
| chr16 | 31792927 | 31793877 | 4.04  |
| chr16 | 31886378 | 31887967 | 4.71  |
| chr16 | 31890768 | 31894999 | 5.05  |
| chr16 | 31895378 | 31896982 | 3.36  |
| chr16 | 31897354 | 31902666 | 5.72  |
| chr16 | 31903961 | 31909714 | 5.72  |
| chr16 | 31916877 | 31930948 | 12.11 |
| chr16 | 31931259 | 31932203 | 3.03  |
| chr16 | 31932913 | 31934773 | 4.04  |
| chr16 | 31936399 | 31937667 | 4.04  |
| chr16 | 32493706 | 32495721 | 5.05  |
| chr16 | 32497485 | 32504144 | 5.72  |
| chr16 | 32504862 | 32572423 | 9.75  |
| chr16 | 32575548 | 32588721 | 8.41  |
| chr16 | 32589862 | 32598553 | 8.41  |
| chr16 | 32599296 | 32600665 | 4.37  |
| chr16 | 32601175 | 32603816 | 5.38  |
| chr16 | 32607962 | 32608781 | 4.37  |
| chr16 | 33237255 | 33239643 | 7.06  |
| chr16 | 33240561 | 33241402 | 9.08  |
| chr16 | 33293544 | 33295288 | 10.43 |
| chr16 | 33865740 | 33868268 | 4.37  |
| chr16 | 33873389 | 33874797 | 9.08  |
| chr16 | 33876310 | 33877514 | 4.37  |
| chr16 | 33879098 | 33882288 | 6.39  |
| chr16 | 33886303 | 33888148 | 4.04  |
| chr16 | 33903217 | 33904521 | 6.39  |
| chr16 | 33915694 | 33917566 | 3.7   |
| chr16 | 33918311 | 33920367 | 9.08  |
| chr16 | 33944250 | 33945208 | 3.7   |

|       |          |          |       |
|-------|----------|----------|-------|
| chr16 | 33966213 | 33977536 | 10.09 |
| chr16 | 33977836 | 33979279 | 3.7   |
| chr16 | 33982012 | 33986262 | 5.72  |
| chr16 | 33986559 | 33988340 | 5.38  |
| chr16 | 33991679 | 33992406 | 4.04  |
| chr16 | 33992641 | 33994662 | 5.05  |
| chr16 | 33996170 | 33997280 | 5.05  |
| chr16 | 33997947 | 33998977 | 3.36  |
| chr16 | 33999917 | 34001397 | 4.37  |
| chr16 | 34001870 | 34002855 | 4.71  |
| chr16 | 34004915 | 34006740 | 3.36  |
| chr16 | 34008908 | 34010059 | 4.37  |
| chr16 | 34010429 | 34013014 | 4.37  |
| chr16 | 34020983 | 34023129 | 5.72  |
| chr16 | 34185076 | 34187216 | 7.74  |
| chr16 | 34192479 | 34193750 | 5.05  |
| chr16 | 34194830 | 34195655 | 3.03  |
| chr16 | 34302859 | 34304325 | 3.7   |
| chr16 | 34665887 | 34666844 | 3.7   |
| chr16 | 34680948 | 34682229 | 5.38  |
| chr16 | 34848842 | 34849911 | 5.05  |
| chr16 | 35001859 | 35004081 | 3.7   |
| chr16 | 35012872 | 35013639 | 3.36  |
| chr16 | 35017038 | 35020328 | 4.71  |
| chr16 | 35158297 | 35159386 | 3.7   |
| chr16 | 35219553 | 35220624 | 3.7   |
| chr16 | 46385638 | 46397470 | 48.44 |
| chr16 | 46398239 | 46412933 | 29.26 |
| chr16 | 46413141 | 46414429 | 8.75  |
| chr16 | 46415010 | 46416195 | 7.4   |
| chr16 | 46416417 | 46418922 | 23.21 |
| chr16 | 46419307 | 46421581 | 11.44 |
| chr16 | 46424527 | 46430489 | 21.19 |
| chr16 | 46430860 | 46432087 | 11.44 |
| chr16 | 46432427 | 46433417 | 13.12 |
| chr16 | 46434152 | 46436280 | 23.21 |
| chr16 | 46437176 | 46438193 | 3.7   |
| chr16 | 46443307 | 46444748 | 6.39  |
| chr16 | 46454525 | 46455725 | 3.7   |
| chr16 | 47523651 | 47525305 | 5.38  |
| chr16 | 48623770 | 48627969 | 11.1  |
| chr16 | 50475235 | 50476742 | 4.71  |
| chr16 | 53108025 | 53109155 | 5.38  |

|       |          |          |       |
|-------|----------|----------|-------|
| chr16 | 53457346 | 53458686 | 5.72  |
| chr16 | 53462783 | 53464240 | 6.05  |
| chr16 | 58306261 | 58307488 | 4.37  |
| chr16 | 63820211 | 63821741 | 8.07  |
| chr16 | 67313181 | 67314156 | 3.7   |
| chr16 | 67515110 | 67515937 | 4.37  |
| chr16 | 67547722 | 67548558 | 4.37  |
| chr16 | 67554602 | 67556046 | 3.03  |
| chr16 | 67686495 | 67687271 | 4.04  |
| chr16 | 67694135 | 67695123 | 4.04  |
| chr16 | 67710093 | 67711074 | 3.7   |
| chr16 | 67875189 | 67876395 | 4.04  |
| chr16 | 67880030 | 67881582 | 4.04  |
| chr16 | 67981811 | 67982833 | 4.04  |
| chr16 | 67995068 | 67996153 | 4.04  |
| chr16 | 68267485 | 68269155 | 5.72  |
| chr16 | 68270866 | 68272397 | 4.04  |
| chr16 | 68344327 | 68345563 | 4.04  |
| chr16 | 68477964 | 68478708 | 3.36  |
| chr16 | 68584029 | 68585446 | 5.05  |
| chr16 | 68586091 | 68612301 | 23.54 |
| chr16 | 68612577 | 68613633 | 3.36  |
| chr16 | 68646665 | 68648588 | 6.05  |
| chr16 | 68692077 | 68693426 | 4.37  |
| chr16 | 68740930 | 68742534 | 4.37  |
| chr16 | 68765452 | 68766701 | 5.38  |
| chr16 | 68963817 | 68964630 | 4.04  |
| chr16 | 69036416 | 69038336 | 11.1  |
| chr16 | 69345053 | 69345771 | 3.36  |
| chr16 | 69372851 | 69374242 | 3.7   |
| chr16 | 69419241 | 69420241 | 3.36  |
| chr16 | 69670054 | 69671393 | 4.71  |
| chr16 | 69760047 | 69761517 | 5.05  |
| chr16 | 69775243 | 69776497 | 4.71  |
| chr16 | 70194120 | 70194944 | 4.04  |
| chr16 | 70334239 | 70335833 | 5.38  |
| chr16 | 70487693 | 70488657 | 4.04  |
| chr16 | 71232121 | 71233205 | 3.7   |
| chr16 | 71259556 | 71261103 | 4.04  |
| chr16 | 71321979 | 71324123 | 3.7   |
| chr16 | 71479292 | 71484568 | 14.8  |
| chr16 | 71485175 | 71486485 | 4.37  |
| chr16 | 71501223 | 71502317 | 5.72  |

|       |          |          |      |
|-------|----------|----------|------|
| chr16 | 71517854 | 71518864 | 4.04 |
| chr16 | 71593827 | 71595163 | 4.37 |
| chr16 | 71678921 | 71679902 | 5.05 |
| chr16 | 71756098 | 71757610 | 3.7  |
| chr16 | 71841868 | 71843260 | 6.05 |
| chr16 | 71927725 | 71930228 | 6.73 |
| chr16 | 71971917 | 71973321 | 6.05 |
| chr16 | 72421657 | 72422838 | 5.05 |
| chr16 | 72439862 | 72440947 | 3.7  |
| chr16 | 72467579 | 72469212 | 7.74 |
| chr16 | 72474806 | 72475846 | 4.04 |
| chr16 | 72481313 | 72482292 | 3.7  |
| chr16 | 72565391 | 72566432 | 4.04 |
| chr16 | 72668458 | 72669435 | 3.7  |
| chr16 | 72705422 | 72708000 | 11.1 |
| chr16 | 72745160 | 72746258 | 3.7  |
| chr16 | 72958517 | 72959801 | 3.7  |
| chr16 | 73030080 | 73031965 | 6.05 |
| chr16 | 73043917 | 73044792 | 4.04 |
| chr16 | 73049025 | 73050321 | 4.04 |
| chr16 | 73053212 | 73054332 | 3.7  |
| chr16 | 73080903 | 73082474 | 4.04 |
| chr16 | 73087906 | 73089411 | 3.7  |
| chr16 | 73091809 | 73092869 | 3.7  |
| chr16 | 73103964 | 73105266 | 5.38 |
| chr16 | 73129434 | 73130496 | 4.04 |
| chr16 | 73178294 | 73179416 | 3.36 |
| chr16 | 73238788 | 73239960 | 4.04 |
| chr16 | 73250082 | 73250895 | 4.04 |
| chr16 | 74018414 | 74019234 | 3.7  |
| chr16 | 74331001 | 74331928 | 3.36 |
| chr16 | 74640151 | 74642036 | 3.36 |
| chr16 | 74734053 | 74734939 | 4.04 |
| chr16 | 74742949 | 74743825 | 4.04 |
| chr16 | 74759531 | 74761407 | 4.71 |
| chr16 | 74777473 | 74778751 | 6.05 |
| chr16 | 74807358 | 74809322 | 4.04 |
| chr16 | 74840483 | 74844967 | 7.74 |
| chr16 | 75034335 | 75035548 | 3.7  |
| chr16 | 75036913 | 75038001 | 3.7  |
| chr16 | 75051454 | 75052437 | 4.04 |
| chr16 | 75054570 | 75056038 | 5.72 |
| chr16 | 75063269 | 75064910 | 5.38 |



|       |          |          |       |
|-------|----------|----------|-------|
| chr16 | 75071065 | 75073931 | 6.39  |
| chr16 | 75087354 | 75089390 | 5.72  |
| chr16 | 75092315 | 75093195 | 4.71  |
| chr16 | 75095612 | 75096677 | 3.36  |
| chr16 | 75098168 | 75099815 | 5.38  |
| chr16 | 75104069 | 75105159 | 4.37  |
| chr16 | 75113980 | 75114801 | 4.37  |
| chr16 | 75130341 | 75131429 | 3.36  |
| chr16 | 75133157 | 75134331 | 5.38  |
| chr16 | 75141547 | 75143212 | 4.37  |
| chr16 | 75144053 | 75145773 | 4.37  |
| chr16 | 75150033 | 75151194 | 4.37  |
| chr16 | 75155273 | 75157060 | 13.79 |
| chr16 | 75160947 | 75162783 | 10.43 |
| chr16 | 75182052 | 75183478 | 3.36  |
| chr16 | 75184656 | 75187798 | 8.75  |
| chr16 | 75188473 | 75189603 | 4.37  |
| chr16 | 75189947 | 75197132 | 6.73  |
| chr16 | 75197413 | 75217510 | 19.17 |
| chr16 | 75218157 | 75218888 | 4.71  |
| chr16 | 75219632 | 75221970 | 4.71  |
| chr16 | 75227116 | 75228718 | 3.36  |
| chr16 | 75278761 | 75279877 | 4.37  |
| chr16 | 75466701 | 75467915 | 5.38  |
| chr16 | 75498168 | 75499426 | 6.05  |
| chr16 | 75525741 | 75526592 | 4.71  |
| chr16 | 75718481 | 75719871 | 7.4   |
| chr16 | 75743023 | 75745501 | 13.45 |
| chr16 | 75775281 | 75778504 | 8.07  |
| chr16 | 76068680 | 76071540 | 9.08  |
| chr16 | 76775242 | 76776252 | 3.03  |
| chr16 | 77636168 | 77638805 | 5.05  |
| chr16 | 77649606 | 77650662 | 4.04  |
| chr16 | 77696117 | 77697252 | 7.06  |
| chr16 | 77821956 | 77822886 | 3.7   |
| chr16 | 77968043 | 77969056 | 3.36  |
| chr16 | 77969332 | 77970583 | 4.71  |
| chr16 | 77994090 | 77995275 | 3.7   |
| chr16 | 78029156 | 78030972 | 9.42  |
| chr16 | 78084620 | 78087089 | 4.04  |
| chr16 | 78101986 | 78102969 | 4.37  |
| chr16 | 78132762 | 78134830 | 6.39  |
| chr16 | 78167655 | 78169427 | 3.7   |

|       |          |          |      |
|-------|----------|----------|------|
| chr16 | 78277889 | 78278900 | 4.71 |
| chr16 | 78282567 | 78283724 | 5.05 |
| chr16 | 78493797 | 78494812 | 4.04 |
| chr16 | 78641081 | 78641943 | 3.03 |
| chr16 | 79229230 | 79230296 | 2.35 |
| chr16 | 79404365 | 79405200 | 3.36 |
| chr16 | 79673266 | 79674295 | 4.04 |
| chr16 | 79995694 | 79996788 | 4.37 |
| chr16 | 80060492 | 80061956 | 6.05 |
| chr16 | 80102288 | 80103109 | 3.36 |
| chr16 | 80130848 | 80131731 | 3.7  |
| chr16 | 80479936 | 80480789 | 3.36 |
| chr16 | 80573926 | 80575137 | 4.71 |
| chr16 | 80627908 | 80628875 | 3.36 |
| chr16 | 80641139 | 80642705 | 4.04 |
| chr16 | 80647140 | 80650543 | 6.39 |
| chr16 | 80653310 | 80654634 | 5.05 |
| chr16 | 80673296 | 80675524 | 4.04 |
| chr16 | 80692761 | 80694704 | 4.37 |
| chr16 | 80751874 | 80753104 | 5.05 |
| chr16 | 80773262 | 80774212 | 3.36 |
| chr16 | 80815354 | 80819181 | 4.71 |
| chr16 | 80846264 | 80847400 | 4.04 |
| chr16 | 80849343 | 80850877 | 4.04 |
| chr16 | 80870931 | 80872509 | 4.37 |
| chr16 | 80874292 | 80876955 | 5.05 |
| chr16 | 80877203 | 80878878 | 3.7  |
| chr16 | 80991687 | 80992843 | 4.04 |
| chr16 | 81040130 | 81041154 | 4.04 |
| chr16 | 81174360 | 81175448 | 4.37 |
| chr16 | 81177198 | 81178275 | 4.71 |
| chr16 | 81208145 | 81209886 | 3.7  |
| chr16 | 81309771 | 81311752 | 5.05 |
| chr16 | 81371737 | 81373064 | 5.72 |
| chr16 | 81379137 | 81382577 | 6.05 |
| chr16 | 81632033 | 81633366 | 3.03 |
| chr16 | 81798503 | 81799525 | 3.7  |
| chr16 | 82002852 | 82004379 | 3.36 |
| chr16 | 82004703 | 82006265 | 5.72 |
| chr16 | 82042096 | 82043579 | 6.39 |
| chr16 | 82044845 | 82046524 | 3.36 |
| chr16 | 82171513 | 82172547 | 3.36 |
| chr16 | 82185807 | 82187059 | 3.7  |

|       |          |          |       |
|-------|----------|----------|-------|
| chr16 | 82203577 | 82204716 | 4.37  |
| chr16 | 82356524 | 82358792 | 4.37  |
| chr16 | 82359878 | 82360663 | 2.35  |
| chr16 | 82362873 | 82365751 | 5.38  |
| chr16 | 82374966 | 82376169 | 3.36  |
| chr16 | 82816428 | 82817249 | 1.35  |
| chr16 | 83595091 | 83596408 | 4.37  |
| chr16 | 83805629 | 83806671 | 3.7   |
| chr16 | 83835600 | 83837605 | 4.71  |
| chr16 | 83923209 | 83924164 | 3.36  |
| chr16 | 83925046 | 83926290 | 5.38  |
| chr16 | 83931503 | 83932247 | 3.36  |
| chr16 | 83959691 | 83961350 | 4.71  |
| chr16 | 83986187 | 83987609 | 4.04  |
| chr16 | 84010289 | 84011242 | 4.04  |
| chr16 | 84011496 | 84013986 | 7.06  |
| chr16 | 84051810 | 84053252 | 4.04  |
| chr16 | 84056030 | 84056982 | 4.04  |
| chr16 | 84129667 | 84130854 | 4.37  |
| chr16 | 84152566 | 84154154 | 4.04  |
| chr16 | 84359898 | 84360790 | 2.69  |
| chr16 | 84400352 | 84402408 | 3.7   |
| chr16 | 84418597 | 84420033 | 4.71  |
| chr16 | 84429810 | 84431265 | 4.71  |
| chr16 | 84526348 | 84528358 | 13.12 |
| chr16 | 84563095 | 84564023 | 4.71  |
| chr16 | 84650650 | 84652102 | 3.7   |
| chr16 | 84681932 | 84683279 | 4.04  |
| chr16 | 84733717 | 84735359 | 4.37  |
| chr16 | 84759133 | 84760318 | 5.72  |
| chr16 | 84762683 | 84764804 | 4.37  |
| chr16 | 84771818 | 84772730 | 3.36  |
| chr16 | 84798919 | 84799770 | 4.71  |
| chr16 | 84832919 | 84833716 | 3.36  |
| chr16 | 84884315 | 84885943 | 4.04  |
| chr16 | 84892898 | 84894229 | 3.7   |
| chr16 | 84907558 | 84909200 | 4.37  |
| chr16 | 84958535 | 84959505 | 4.37  |
| chr16 | 85027743 | 85029122 | 4.04  |
| chr16 | 85032746 | 85033647 | 5.05  |
| chr16 | 85034044 | 85034970 | 3.7   |
| chr16 | 85148419 | 85149285 | 3.36  |
| chr16 | 85159414 | 85161000 | 3.7   |

|       |          |          |      |
|-------|----------|----------|------|
| chr16 | 85177081 | 85178602 | 4.04 |
| chr16 | 85179121 | 85181572 | 4.37 |
| chr16 | 85286739 | 85287643 | 4.04 |
| chr16 | 85339541 | 85340580 | 5.72 |
| chr16 | 85382707 | 85385195 | 5.38 |
| chr16 | 85398317 | 85399543 | 5.38 |
| chr16 | 85424206 | 85425459 | 4.04 |
| chr16 | 85455528 | 85457124 | 4.37 |
| chr16 | 85470530 | 85471637 | 4.04 |
| chr16 | 85475741 | 85476581 | 2.69 |
| chr16 | 85478180 | 85479358 | 4.04 |
| chr16 | 85482108 | 85483463 | 5.72 |
| chr16 | 85491743 | 85493183 | 3.7  |
| chr16 | 85496275 | 85497879 | 3.7  |
| chr16 | 85505061 | 85506614 | 3.7  |
| chr16 | 85525105 | 85527045 | 5.38 |
| chr16 | 85547866 | 85550025 | 4.04 |
| chr16 | 85553903 | 85555638 | 6.05 |
| chr16 | 85558305 | 85559374 | 3.36 |
| chr16 | 85587103 | 85588712 | 4.71 |
| chr16 | 85603023 | 85605147 | 7.06 |
| chr16 | 85636050 | 85637192 | 4.04 |
| chr16 | 85645051 | 85649617 | 5.05 |
| chr16 | 85673066 | 85674033 | 3.7  |
| chr16 | 85675562 | 85676717 | 3.36 |
| chr16 | 85678405 | 85679816 | 6.73 |
| chr16 | 85811215 | 85812360 | 4.37 |
| chr16 | 85832605 | 85833873 | 5.72 |
| chr16 | 85854723 | 85855708 | 3.7  |
| chr16 | 85924510 | 85926400 | 3.7  |
| chr16 | 85971462 | 85972319 | 4.04 |
| chr16 | 86056859 | 86058166 | 5.05 |
| chr16 | 86082959 | 86084098 | 3.7  |
| chr16 | 86226767 | 86228115 | 5.05 |
| chr16 | 86375759 | 86376799 | 3.36 |
| chr16 | 86431678 | 86432595 | 2.02 |
| chr16 | 86442460 | 86443436 | 4.04 |
| chr16 | 86480436 | 86481401 | 3.03 |
| chr16 | 86494008 | 86495575 | 5.72 |
| chr16 | 86516959 | 86519081 | 4.71 |
| chr16 | 86658245 | 86659189 | 3.7  |
| chr16 | 86681313 | 86683337 | 5.72 |
| chr16 | 86686526 | 86687404 | 4.37 |

|       |          |          |       |
|-------|----------|----------|-------|
| chr16 | 86689655 | 86690759 | 4.04  |
| chr16 | 86855390 | 86856371 | 3.7   |
| chr16 | 86878063 | 86879161 | 4.37  |
| chr16 | 86901867 | 86902789 | 3.7   |
| chr16 | 86954349 | 86957329 | 4.04  |
| chr16 | 86972823 | 86974205 | 5.38  |
| chr16 | 86975441 | 86976697 | 4.37  |
| chr16 | 87007499 | 87008484 | 3.7   |
| chr16 | 87113558 | 87116575 | 8.07  |
| chr16 | 87120188 | 87121079 | 2.02  |
| chr16 | 87222843 | 87224797 | 5.72  |
| chr16 | 87273859 | 87275831 | 3.36  |
| chr16 | 87337914 | 87338969 | 4.37  |
| chr16 | 87339201 | 87340173 | 5.38  |
| chr16 | 87349572 | 87352000 | 5.38  |
| chr16 | 87417075 | 87418507 | 5.38  |
| chr16 | 87426266 | 87427359 | 4.37  |
| chr16 | 87566081 | 87567548 | 6.73  |
| chr16 | 87569679 | 87571423 | 3.7   |
| chr16 | 87604351 | 87605607 | 4.71  |
| chr16 | 87614932 | 87616143 | 3.36  |
| chr16 | 87700916 | 87702026 | 4.37  |
| chr16 | 87728258 | 87729004 | 3.7   |
| chr16 | 87738835 | 87740948 | 5.05  |
| chr16 | 87811085 | 87813429 | 4.04  |
| chr16 | 87823040 | 87824383 | 4.04  |
| chr16 | 87840252 | 87841102 | 3.36  |
| chr16 | 87848920 | 87852046 | 7.4   |
| chr16 | 87881427 | 87882410 | 2.69  |
| chr16 | 87886649 | 87889190 | 4.04  |
| chr16 | 87978953 | 87980137 | 5.38  |
| chr16 | 88004791 | 88006366 | 3.7   |
| chr16 | 88129817 | 88131119 | 7.06  |
| chr16 | 88319537 | 88322699 | 4.71  |
| chr16 | 88464780 | 88465917 | 4.71  |
| chr16 | 88520464 | 88521271 | 4.04  |
| chr16 | 88567375 | 88568146 | 4.04  |
| chr16 | 88606983 | 88610921 | 13.79 |
| chr16 | 88626690 | 88628006 | 5.38  |
| chr16 | 88700939 | 88701809 | 3.7   |
| chr16 | 88751653 | 88752897 | 3.36  |
| chr16 | 88772340 | 88773537 | 3.36  |
| chr16 | 88803618 | 88804518 | 3.36  |

|       |          |          |       |
|-------|----------|----------|-------|
| chr16 | 88814273 | 88815189 | 3.36  |
| chr16 | 88821304 | 88822527 | 5.05  |
| chr16 | 88824297 | 88825314 | 4.37  |
| chr16 | 88826976 | 88828624 | 4.37  |
| chr16 | 88829762 | 88832122 | 5.05  |
| chr16 | 88836870 | 88837817 | 4.04  |
| chr16 | 88839167 | 88840070 | 2.35  |
| chr16 | 88850105 | 88852085 | 5.38  |
| chr16 | 88875076 | 88876395 | 5.05  |
| chr16 | 88876771 | 88879613 | 4.71  |
| chr16 | 88986850 | 88988098 | 4.71  |
| chr16 | 88992455 | 88996280 | 4.71  |
| chr16 | 89006620 | 89007585 | 3.7   |
| chr16 | 89103242 | 89104221 | 3.7   |
| chr16 | 89115152 | 89116056 | 2.69  |
| chr16 | 89119665 | 89120581 | 4.37  |
| chr16 | 89164064 | 89164883 | 3.36  |
| chr16 | 89214247 | 89216733 | 6.73  |
| chr16 | 89216946 | 89218148 | 4.37  |
| chr16 | 89219985 | 89222125 | 3.36  |
| chr16 | 89233808 | 89234645 | 4.04  |
| chr16 | 89283354 | 89284328 | 3.7   |
| chr16 | 89291010 | 89299335 | 12.45 |
| chr16 | 89299750 | 89301357 | 4.71  |
| chr16 | 89312482 | 89313937 | 3.36  |
| chr16 | 89411124 | 89412547 | 3.36  |
| chr16 | 89442107 | 89443979 | 4.37  |
| chr16 | 89449020 | 89450244 | 5.05  |
| chr16 | 89542298 | 89543720 | 5.05  |
| chr16 | 89568232 | 89569310 | 3.36  |
| chr16 | 89573736 | 89575588 | 4.71  |
| chr16 | 89625956 | 89628489 | 5.05  |
| chr16 | 89631674 | 89633098 | 6.05  |
| chr16 | 89706267 | 89707072 | 2.69  |
| chr16 | 89724045 | 89725494 | 4.37  |
| chr16 | 89742916 | 89746491 | 13.12 |
| chr16 | 89750894 | 89753426 | 5.38  |
| chr16 | 89766262 | 89767614 | 4.37  |
| chr16 | 89786190 | 89789664 | 4.37  |
| chr16 | 89899765 | 89900708 | 3.7   |
| chr16 | 89908837 | 89909931 | 3.36  |
| chr16 | 89934039 | 89935134 | 5.38  |
| chr16 | 89936249 | 89937067 | 3.7   |

|       |          |          |       |
|-------|----------|----------|-------|
| chr16 | 89938976 | 89940561 | 3.36  |
| chr16 | 89971799 | 89973685 | 4.37  |
| chr16 | 89975879 | 89977294 | 4.71  |
| chr16 | 89983746 | 89984959 | 4.37  |
| chr16 | 89987712 | 89989958 | 3.7   |
| chr16 | 90038470 | 90039777 | 4.04  |
| chr16 | 90061208 | 90062639 | 4.04  |
| chr16 | 90084388 | 90087287 | 3.7   |
| chr16 | 90110283 | 90111376 | 4.37  |
| chr16 | 90113324 | 90114424 | 3.7   |
| chr16 | 90119390 | 90122561 | 15.81 |
| chr16 | 90122793 | 90124135 | 4.04  |
| chr16 | 90145540 | 90146616 | 5.05  |
| chr16 | 90147866 | 90149353 | 5.38  |
| chr15 | 20545006 | 20548203 | 7.06  |
| chr15 | 20562458 | 20563535 | 2.69  |
| chr15 | 20587687 | 20588849 | 4.04  |
| chr15 | 20591068 | 20592205 | 3.7   |
| chr15 | 20613537 | 20614387 | 2.69  |
| chr15 | 20848827 | 20851969 | 3.36  |
| chr15 | 21199894 | 21201061 | 3.7   |
| chr15 | 25302550 | 25304620 | 4.04  |
| chr15 | 25315158 | 25318267 | 4.71  |
| chr15 | 25418827 | 25419644 | 4.71  |
| chr15 | 25624142 | 25625231 | 3.36  |
| chr15 | 25630499 | 25631421 | 3.03  |
| chr15 | 25663501 | 25666126 | 4.04  |
| chr15 | 27421574 | 27422763 | 3.7   |
| chr15 | 32359023 | 32360278 | 5.38  |
| chr15 | 33336185 | 33336953 | 3.7   |
| chr15 | 33339165 | 33341474 | 6.05  |
| chr15 | 33360155 | 33361625 | 3.36  |
| chr15 | 34453033 | 34454268 | 4.71  |
| chr15 | 40306349 | 40307459 | 5.72  |
| chr15 | 41047227 | 41048323 | 4.71  |
| chr15 | 42197904 | 42199156 | 4.04  |
| chr15 | 43652845 | 43655366 | 8.41  |
| chr15 | 45167354 | 45169062 | 6.05  |
| chr15 | 45169563 | 45170948 | 6.73  |
| chr15 | 45342321 | 45343705 | 6.05  |
| chr15 | 45526669 | 45527880 | 6.05  |
| chr15 | 45533598 | 45535186 | 5.72  |
| chr15 | 45612515 | 45613575 | 4.37  |

|       |          |          |      |
|-------|----------|----------|------|
| chr15 | 48195119 | 48196245 | 3.7  |
| chr15 | 49746773 | 49748062 | 4.71 |
| chr15 | 49752839 | 49753944 | 4.37 |
| chr15 | 49761612 | 49762739 | 3.7  |
| chr15 | 49784431 | 49785973 | 4.37 |
| chr15 | 49788692 | 49789485 | 3.7  |
| chr15 | 49789848 | 49790760 | 3.7  |
| chr15 | 49793142 | 49795086 | 7.74 |
| chr15 | 49807153 | 49808775 | 3.7  |
| chr15 | 49810692 | 49811541 | 4.04 |
| chr15 | 49812899 | 49814741 | 4.37 |
| chr15 | 49824250 | 49827150 | 5.72 |
| chr15 | 49827436 | 49828383 | 3.36 |
| chr15 | 49830120 | 49832942 | 5.05 |
| chr15 | 49835843 | 49837073 | 4.37 |
| chr15 | 49843233 | 49848435 | 6.39 |
| chr15 | 49850394 | 49851277 | 4.04 |
| chr15 | 49851643 | 49856706 | 5.05 |
| chr15 | 49859888 | 49860920 | 3.36 |
| chr15 | 49861150 | 49861949 | 2.35 |
| chr15 | 49864328 | 49865441 | 4.71 |
| chr15 | 49868085 | 49870892 | 5.05 |
| chr15 | 49873785 | 49874773 | 3.36 |
| chr15 | 49881290 | 49882207 | 3.03 |
| chr15 | 49885516 | 49888260 | 4.71 |
| chr15 | 49888827 | 49890031 | 4.37 |
| chr15 | 49890257 | 49892614 | 4.71 |
| chr15 | 49893209 | 49894472 | 5.05 |
| chr15 | 49895478 | 49899630 | 5.38 |
| chr15 | 49902620 | 49904382 | 4.04 |
| chr15 | 49905496 | 49914126 | 9.08 |
| chr15 | 49914360 | 49918803 | 6.73 |
| chr15 | 49921253 | 49922327 | 3.36 |
| chr15 | 49930604 | 49931633 | 3.36 |
| chr15 | 49935750 | 49937478 | 3.36 |
| chr15 | 49937748 | 49939211 | 4.04 |
| chr15 | 49940892 | 49941684 | 3.36 |
| chr15 | 49942988 | 49947608 | 6.05 |
| chr15 | 49951138 | 49952989 | 3.36 |
| chr15 | 49953219 | 49954093 | 3.36 |
| chr15 | 49954808 | 49956814 | 4.04 |
| chr15 | 49959111 | 49960562 | 4.37 |
| chr15 | 49964113 | 49965652 | 3.7  |



|       |          |          |       |
|-------|----------|----------|-------|
| chr15 | 49965962 | 49968655 | 4.71  |
| chr15 | 49969502 | 49974042 | 4.04  |
| chr15 | 49974309 | 49976599 | 3.7   |
| chr15 | 49978554 | 49980726 | 3.7   |
| chr15 | 49984119 | 49985121 | 3.36  |
| chr15 | 49987033 | 49988268 | 4.04  |
| chr15 | 49999559 | 50004436 | 5.72  |
| chr15 | 50006612 | 50007630 | 4.04  |
| chr15 | 50009406 | 50011222 | 3.36  |
| chr15 | 50011793 | 50012784 | 4.04  |
| chr15 | 50015843 | 50020098 | 4.37  |
| chr15 | 50033522 | 50035538 | 4.37  |
| chr15 | 50040630 | 50041902 | 3.7   |
| chr15 | 50042283 | 50044355 | 4.71  |
| chr15 | 50044990 | 50045798 | 3.7   |
| chr15 | 50049722 | 50054138 | 6.05  |
| chr15 | 50054676 | 50057787 | 4.04  |
| chr15 | 50058843 | 50060448 | 4.71  |
| chr15 | 50061270 | 50065194 | 5.05  |
| chr15 | 50067628 | 50070124 | 3.36  |
| chr15 | 50077305 | 50078702 | 4.71  |
| chr15 | 50079110 | 50086396 | 13.45 |
| chr15 | 50091825 | 50093740 | 4.04  |
| chr15 | 50094860 | 50095803 | 4.37  |
| chr15 | 50097343 | 50098862 | 4.04  |
| chr15 | 50101715 | 50103152 | 3.03  |
| chr15 | 50105522 | 50107397 | 4.71  |
| chr15 | 50109030 | 50113342 | 5.05  |
| chr15 | 50113784 | 50117159 | 5.38  |
| chr15 | 50118718 | 50122324 | 4.37  |
| chr15 | 50123252 | 50125673 | 6.73  |
| chr15 | 50131249 | 50133387 | 4.37  |
| chr15 | 50134063 | 50135137 | 3.03  |
| chr15 | 50135680 | 50136517 | 3.7   |
| chr15 | 50141475 | 50143288 | 3.7   |
| chr15 | 50148995 | 50150493 | 4.04  |
| chr15 | 50154868 | 50159570 | 5.38  |
| chr15 | 50159850 | 50160891 | 4.04  |
| chr15 | 50162892 | 50163945 | 3.36  |
| chr15 | 50164188 | 50166305 | 3.03  |
| chr15 | 50166875 | 50169341 | 4.71  |
| chr15 | 50171422 | 50172818 | 5.05  |
| chr15 | 50173838 | 50174924 | 3.36  |

|       |          |          |      |
|-------|----------|----------|------|
| chr15 | 50177591 | 50178505 | 2.35 |
| chr15 | 50179345 | 50180838 | 3.7  |
| chr15 | 50181169 | 50182567 | 4.37 |
| chr15 | 50184751 | 50186003 | 5.38 |
| chr15 | 50187145 | 50190798 | 4.71 |
| chr15 | 50191593 | 50193783 | 4.04 |
| chr15 | 50194130 | 50195640 | 3.36 |
| chr15 | 50198430 | 50205416 | 6.73 |
| chr15 | 50206144 | 50210874 | 4.71 |
| chr15 | 50213835 | 50217060 | 4.04 |
| chr15 | 50217844 | 50220680 | 4.71 |
| chr15 | 50221218 | 50222114 | 3.7  |
| chr15 | 50225050 | 50230248 | 5.05 |
| chr15 | 50230478 | 50232532 | 4.71 |
| chr15 | 50234661 | 50239744 | 5.38 |
| chr15 | 50245284 | 50246341 | 2.35 |
| chr15 | 50250932 | 50252621 | 4.71 |
| chr15 | 50253335 | 50255097 | 4.04 |
| chr15 | 50255635 | 50258934 | 4.71 |
| chr15 | 50264406 | 50265723 | 4.71 |
| chr15 | 50266498 | 50267413 | 3.36 |
| chr15 | 50268796 | 50270506 | 3.36 |
| chr15 | 50276087 | 50277678 | 5.38 |
| chr15 | 50280596 | 50288897 | 4.37 |
| chr15 | 50289319 | 50290192 | 4.04 |
| chr15 | 50291788 | 50293465 | 4.04 |
| chr15 | 50293795 | 50297202 | 4.71 |
| chr15 | 50299071 | 50300915 | 3.7  |
| chr15 | 50302909 | 50303973 | 4.71 |
| chr15 | 50307759 | 50308632 | 3.03 |
| chr15 | 50311227 | 50313164 | 4.04 |
| chr15 | 50314237 | 50316413 | 4.04 |
| chr15 | 50319202 | 50321149 | 5.05 |
| chr15 | 50324747 | 50326177 | 3.36 |
| chr15 | 50326858 | 50331368 | 3.7  |
| chr15 | 50332108 | 50338834 | 5.05 |
| chr15 | 50343483 | 50345366 | 5.72 |
| chr15 | 50345725 | 50348316 | 4.71 |
| chr15 | 50348843 | 50352527 | 4.71 |
| chr15 | 50352920 | 50354430 | 4.71 |
| chr15 | 50356619 | 50358215 | 4.04 |
| chr15 | 50359587 | 50364720 | 4.04 |
| chr15 | 50368585 | 50369739 | 4.37 |

|       |          |          |      |
|-------|----------|----------|------|
| chr15 | 50371286 | 50372838 | 3.7  |
| chr15 | 50373321 | 50374157 | 3.7  |
| chr15 | 50376132 | 50377530 | 4.04 |
| chr15 | 50381971 | 50382785 | 4.04 |
| chr15 | 50383235 | 50384865 | 3.36 |
| chr15 | 50387629 | 50388864 | 4.71 |
| chr15 | 50397531 | 50400776 | 3.7  |
| chr15 | 50402735 | 50407778 | 4.37 |
| chr15 | 50411963 | 50421373 | 7.4  |
| chr15 | 50426462 | 50428038 | 3.36 |
| chr15 | 50431469 | 50432687 | 5.05 |
| chr15 | 50433240 | 50435860 | 3.7  |
| chr15 | 50440548 | 50442086 | 3.7  |
| chr15 | 50445851 | 50450028 | 7.4  |
| chr15 | 50452246 | 50454143 | 3.36 |
| chr15 | 50454826 | 50457466 | 6.39 |
| chr15 | 50457868 | 50461638 | 5.38 |
| chr15 | 50462717 | 50464432 | 3.7  |
| chr15 | 50468382 | 50470947 | 4.37 |
| chr15 | 50472899 | 50476475 | 5.38 |
| chr15 | 50478985 | 50479800 | 3.36 |
| chr15 | 50482100 | 50485544 | 3.7  |
| chr15 | 50493980 | 50496204 | 3.7  |
| chr15 | 50497069 | 50499657 | 4.71 |
| chr15 | 50500036 | 50507970 | 6.05 |
| chr15 | 50510990 | 50512571 | 4.71 |
| chr15 | 50513731 | 50516164 | 4.37 |
| chr15 | 50517615 | 50522015 | 6.39 |
| chr15 | 50522659 | 50523288 | 4.04 |
| chr15 | 50526478 | 50528061 | 5.05 |
| chr15 | 50529836 | 50531351 | 4.37 |
| chr15 | 50532984 | 50536449 | 4.37 |
| chr15 | 50537735 | 50539052 | 4.04 |
| chr15 | 50539551 | 50551879 | 8.07 |
| chr15 | 50554096 | 50555865 | 4.37 |
| chr15 | 50557699 | 50558994 | 3.36 |
| chr15 | 50559505 | 50562243 | 5.38 |
| chr15 | 50563314 | 50565316 | 5.05 |
| chr15 | 50566993 | 50570891 | 4.37 |
| chr15 | 50571495 | 50572340 | 3.7  |
| chr15 | 50579125 | 50582023 | 4.04 |
| chr15 | 50584150 | 50586425 | 4.71 |
| chr15 | 50591713 | 50592785 | 3.36 |

|       |          |          |      |
|-------|----------|----------|------|
| chr15 | 50595841 | 50596665 | 3.36 |
| chr15 | 50597088 | 50598435 | 2.69 |
| chr15 | 50599838 | 50601759 | 4.04 |
| chr15 | 50603055 | 50604210 | 5.05 |
| chr15 | 50605116 | 50607271 | 4.37 |
| chr15 | 50612600 | 50613547 | 3.36 |
| chr15 | 50616916 | 50617930 | 3.7  |
| chr15 | 50618822 | 50619975 | 4.04 |
| chr15 | 50622795 | 50623595 | 3.36 |
| chr15 | 50626180 | 50627804 | 4.04 |
| chr15 | 50629397 | 50630237 | 3.7  |
| chr15 | 50633822 | 50634907 | 3.36 |
| chr15 | 50644788 | 50648483 | 7.06 |
| chr15 | 50650557 | 50651902 | 4.37 |
| chr15 | 50654059 | 50655195 | 4.37 |
| chr15 | 50669330 | 50671127 | 4.04 |
| chr15 | 50675384 | 50676556 | 3.7  |
| chr15 | 50680486 | 50681597 | 4.37 |
| chr15 | 50682608 | 50684014 | 4.37 |
| chr15 | 50697223 | 50698758 | 4.37 |
| chr15 | 50708776 | 50710805 | 4.37 |
| chr15 | 50712843 | 50714466 | 4.04 |
| chr15 | 50715816 | 50718065 | 5.05 |
| chr15 | 50721182 | 50723117 | 4.71 |
| chr15 | 50734879 | 50735711 | 3.7  |
| chr15 | 50744114 | 50745675 | 3.7  |
| chr15 | 50776010 | 50777165 | 4.71 |
| chr15 | 50788807 | 50790322 | 3.36 |
| chr15 | 50803317 | 50804119 | 2.35 |
| chr15 | 50805751 | 50806856 | 3.03 |
| chr15 | 50815943 | 50817486 | 3.03 |
| chr15 | 50823672 | 50824614 | 4.37 |
| chr15 | 50896902 | 50898037 | 3.7  |
| chr15 | 50966599 | 50968036 | 3.36 |
| chr15 | 50976257 | 50980688 | 6.73 |
| chr15 | 50983683 | 50984817 | 4.04 |
| chr15 | 50989200 | 50990280 | 3.7  |
| chr15 | 51021755 | 51023258 | 3.7  |
| chr15 | 51024680 | 51025899 | 3.36 |
| chr15 | 51056030 | 51058571 | 6.73 |
| chr15 | 51058879 | 51061562 | 5.72 |
| chr15 | 51068838 | 51071117 | 5.05 |
| chr15 | 51074928 | 51075808 | 3.36 |

|       |          |          |       |
|-------|----------|----------|-------|
| chr15 | 51078397 | 51079482 | 3.7   |
| chr15 | 51089603 | 51092512 | 5.05  |
| chr15 | 51099451 | 51100552 | 4.37  |
| chr15 | 51107313 | 51109284 | 5.05  |
| chr15 | 51115491 | 51116939 | 3.36  |
| chr15 | 51127008 | 51128358 | 4.04  |
| chr15 | 51131837 | 51133197 | 4.04  |
| chr15 | 51145792 | 51148152 | 8.75  |
| chr15 | 51148453 | 51151303 | 4.71  |
| chr15 | 51156433 | 51157507 | 4.04  |
| chr15 | 51168423 | 51170019 | 4.04  |
| chr15 | 51170938 | 51171755 | 3.03  |
| chr15 | 51172878 | 51173890 | 3.03  |
| chr15 | 51177658 | 51178785 | 4.04  |
| chr15 | 51182373 | 51187158 | 10.43 |
| chr15 | 51192103 | 51193334 | 3.7   |
| chr15 | 51199696 | 51201903 | 7.06  |
| chr15 | 51205020 | 51206112 | 3.7   |
| chr15 | 51206971 | 51208336 | 4.71  |
| chr15 | 51210150 | 51211013 | 2.69  |
| chr15 | 51228671 | 51231560 | 4.04  |
| chr15 | 51239679 | 51240600 | 2.69  |
| chr15 | 51245246 | 51246679 | 4.04  |
| chr15 | 51247629 | 51248546 | 4.04  |
| chr15 | 51251592 | 51257443 | 8.07  |
| chr15 | 51259020 | 51260518 | 4.71  |
| chr15 | 51262380 | 51269235 | 6.39  |
| chr15 | 51269512 | 51270246 | 4.04  |
| chr15 | 51272920 | 51273762 | 3.03  |
| chr15 | 51274522 | 51275743 | 4.37  |
| chr15 | 51289231 | 51290248 | 4.04  |
| chr15 | 51298282 | 51299430 | 4.37  |
| chr15 | 51300447 | 51301415 | 3.7   |
| chr15 | 51304879 | 51307625 | 4.04  |
| chr15 | 51307929 | 51312627 | 5.05  |
| chr15 | 51313343 | 51324158 | 8.41  |
| chr15 | 51329559 | 51333325 | 5.72  |
| chr15 | 51333753 | 51335380 | 4.04  |
| chr15 | 51335717 | 51337183 | 5.38  |
| chr15 | 51338032 | 51340088 | 4.04  |
| chr15 | 51341879 | 51343062 | 3.36  |
| chr15 | 51347312 | 51349121 | 4.04  |
| chr15 | 51349393 | 51351002 | 4.37  |

|       |          |          |      |
|-------|----------|----------|------|
| chr15 | 51351979 | 51352693 | 3.36 |
| chr15 | 51354475 | 51355583 | 3.7  |
| chr15 | 51356019 | 51356977 | 3.7  |
| chr15 | 51359937 | 51360907 | 3.7  |
| chr15 | 51380824 | 51382839 | 5.38 |
| chr15 | 51386724 | 51388620 | 4.04 |
| chr15 | 51399885 | 51400821 | 3.36 |
| chr15 | 51403198 | 51404861 | 4.37 |
| chr15 | 51407488 | 51408504 | 3.7  |
| chr15 | 51412791 | 51413634 | 3.03 |
| chr15 | 51416216 | 51417246 | 5.38 |
| chr15 | 51421471 | 51422404 | 3.03 |
| chr15 | 51423963 | 51426080 | 6.39 |
| chr15 | 51438524 | 51439410 | 3.7  |
| chr15 | 51443274 | 51446713 | 5.05 |
| chr15 | 51447532 | 51448874 | 4.37 |
| chr15 | 51453906 | 51456348 | 4.37 |
| chr15 | 51460548 | 51461611 | 3.7  |
| chr15 | 51463373 | 51465816 | 3.36 |
| chr15 | 51471131 | 51472016 | 4.71 |
| chr15 | 51473080 | 51474096 | 4.04 |
| chr15 | 51476712 | 51478379 | 3.7  |
| chr15 | 51482255 | 51483641 | 3.7  |
| chr15 | 51484611 | 51485706 | 3.36 |
| chr15 | 51490485 | 51491487 | 3.7  |
| chr15 | 51510324 | 51512716 | 4.04 |
| chr15 | 51516111 | 51517033 | 4.37 |
| chr15 | 51519631 | 51522623 | 5.05 |
| chr15 | 51524564 | 51525426 | 2.02 |
| chr15 | 51533885 | 51534840 | 3.7  |
| chr15 | 51535383 | 51537451 | 5.38 |
| chr15 | 51537818 | 51538539 | 2.69 |
| chr15 | 51541657 | 51543064 | 3.7  |
| chr15 | 51545414 | 51546543 | 4.04 |
| chr15 | 51550924 | 51552804 | 4.04 |
| chr15 | 51553005 | 51556512 | 5.05 |
| chr15 | 51557770 | 51558644 | 3.7  |
| chr15 | 51559368 | 51560529 | 4.37 |
| chr15 | 51561785 | 51562752 | 3.7  |
| chr15 | 51563471 | 51564715 | 3.7  |
| chr15 | 51570821 | 51571826 | 3.7  |
| chr15 | 51578329 | 51579668 | 4.71 |
| chr15 | 51583982 | 51585354 | 5.05 |

|       |          |          |      |
|-------|----------|----------|------|
| chr15 | 51588686 | 51589730 | 3.36 |
| chr15 | 51593201 | 51595530 | 3.7  |
| chr15 | 51599911 | 51601529 | 4.04 |
| chr15 | 51602308 | 51603212 | 3.03 |
| chr15 | 51607231 | 51609288 | 3.7  |
| chr15 | 51610515 | 51612529 | 4.37 |
| chr15 | 51613354 | 51614450 | 4.37 |
| chr15 | 51615434 | 51617163 | 4.37 |
| chr15 | 51619899 | 51621460 | 3.7  |
| chr15 | 51622253 | 51623648 | 4.04 |
| chr15 | 51624593 | 51626393 | 4.04 |
| chr15 | 51629598 | 51635803 | 5.05 |
| chr15 | 51637529 | 51638559 | 3.36 |
| chr15 | 51644884 | 51646997 | 4.37 |
| chr15 | 51652215 | 51653732 | 3.7  |
| chr15 | 51655121 | 51656918 | 5.05 |
| chr15 | 51657614 | 51662853 | 5.72 |
| chr15 | 51663176 | 51664882 | 3.7  |
| chr15 | 51666191 | 51667021 | 3.36 |
| chr15 | 51676014 | 51677181 | 3.36 |
| chr15 | 51682786 | 51683627 | 3.03 |
| chr15 | 51685546 | 51686530 | 3.36 |
| chr15 | 51693267 | 51695474 | 4.37 |
| chr15 | 51699613 | 51700891 | 3.7  |
| chr15 | 51701336 | 51703044 | 3.03 |
| chr15 | 51715261 | 51716657 | 4.71 |
| chr15 | 51717964 | 51720062 | 4.04 |
| chr15 | 51724440 | 51727974 | 5.72 |
| chr15 | 51733213 | 51734103 | 3.7  |
| chr15 | 51734618 | 51735732 | 4.04 |
| chr15 | 51761880 | 51762980 | 3.03 |
| chr15 | 51764550 | 51765654 | 4.04 |
| chr15 | 51776202 | 51778146 | 6.05 |
| chr15 | 51786146 | 51787017 | 4.04 |
| chr15 | 51787435 | 51788534 | 3.36 |
| chr15 | 51789918 | 51792095 | 5.05 |
| chr15 | 51806819 | 51808046 | 3.36 |
| chr15 | 51816424 | 51819891 | 4.04 |
| chr15 | 51830125 | 51831158 | 4.04 |
| chr15 | 51855978 | 51858393 | 4.37 |
| chr15 | 51859861 | 51861797 | 5.38 |
| chr15 | 51866108 | 51867588 | 3.36 |
| chr15 | 51868361 | 51869757 | 4.37 |

|       |          |          |      |
|-------|----------|----------|------|
| chr15 | 51874001 | 51875196 | 4.04 |
| chr15 | 51900449 | 51901219 | 4.04 |
| chr15 | 51903832 | 51908032 | 5.72 |
| chr15 | 51909396 | 51910398 | 3.7  |
| chr15 | 51913527 | 51915622 | 5.72 |
| chr15 | 51918433 | 51919693 | 3.7  |
| chr15 | 51967065 | 51969194 | 4.37 |
| chr15 | 51971171 | 51972109 | 3.03 |
| chr15 | 51972703 | 51974825 | 4.04 |
| chr15 | 51982606 | 51983974 | 4.04 |
| chr15 | 51985013 | 51986486 | 4.04 |
| chr15 | 51989934 | 51991063 | 5.38 |
| chr15 | 52004960 | 52005812 | 3.36 |
| chr15 | 52013157 | 52014017 | 2.69 |
| chr15 | 52024071 | 52025443 | 3.7  |
| chr15 | 52027220 | 52028175 | 4.04 |
| chr15 | 52028524 | 52030280 | 4.37 |
| chr15 | 52035132 | 52036113 | 4.71 |
| chr15 | 52040635 | 52042217 | 3.7  |
| chr15 | 52043317 | 52044850 | 2.69 |
| chr15 | 52046545 | 52047610 | 3.7  |
| chr15 | 52050540 | 52051518 | 3.03 |
| chr15 | 52051929 | 52052983 | 4.04 |
| chr15 | 52068041 | 52070026 | 4.37 |
| chr15 | 52072791 | 52073915 | 3.7  |
| chr15 | 52076145 | 52077071 | 3.7  |
| chr15 | 52085435 | 52087236 | 4.04 |
| chr15 | 52089396 | 52091448 | 3.36 |
| chr15 | 52107632 | 52109150 | 4.04 |
| chr15 | 52112793 | 52114505 | 4.04 |
| chr15 | 52117644 | 52118572 | 3.7  |
| chr15 | 52120200 | 52123131 | 4.37 |
| chr15 | 52126839 | 52128540 | 4.04 |
| chr15 | 52136573 | 52137965 | 3.36 |
| chr15 | 52138495 | 52140588 | 3.36 |
| chr15 | 52151193 | 52152731 | 3.7  |
| chr15 | 52166461 | 52168001 | 4.37 |
| chr15 | 52199223 | 52201518 | 4.37 |
| chr15 | 52209932 | 52210728 | 3.36 |
| chr15 | 52242790 | 52244681 | 4.04 |
| chr15 | 52247398 | 52249025 | 4.71 |
| chr15 | 52257023 | 52258192 | 4.71 |
| chr15 | 52259141 | 52260283 | 5.72 |



|       |          |          |      |
|-------|----------|----------|------|
| chr15 | 52261629 | 52264868 | 5.38 |
| chr15 | 52278196 | 52279660 | 4.71 |
| chr15 | 52284891 | 52285927 | 3.36 |
| chr15 | 52286796 | 52287601 | 3.36 |
| chr15 | 52295405 | 52296426 | 4.04 |
| chr15 | 52300737 | 52301851 | 4.04 |
| chr15 | 52302863 | 52306306 | 4.37 |
| chr15 | 52310742 | 52314957 | 4.71 |
| chr15 | 52321376 | 52322412 | 3.36 |
| chr15 | 52322839 | 52324389 | 3.7  |
| chr15 | 52325085 | 52326697 | 6.39 |
| chr15 | 52327002 | 52328979 | 5.05 |
| chr15 | 52333809 | 52334734 | 3.36 |
| chr15 | 52351684 | 52352882 | 4.04 |
| chr15 | 52363398 | 52364654 | 5.05 |
| chr15 | 52365465 | 52366270 | 4.04 |
| chr15 | 52370397 | 52371615 | 5.05 |
| chr15 | 52376869 | 52379832 | 7.74 |
| chr15 | 52380259 | 52383024 | 5.05 |
| chr15 | 52385248 | 52386996 | 3.7  |
| chr15 | 52391410 | 52392431 | 4.04 |
| chr15 | 52395363 | 52396950 | 4.37 |
| chr15 | 52397417 | 52398932 | 4.37 |
| chr15 | 52404180 | 52405028 | 3.36 |
| chr15 | 52422120 | 52423124 | 3.7  |
| chr15 | 52433698 | 52434823 | 3.36 |
| chr15 | 52470084 | 52471037 | 3.36 |
| chr15 | 52471384 | 52473033 | 4.71 |
| chr15 | 52475336 | 52476903 | 4.71 |
| chr15 | 52478242 | 52479085 | 4.04 |
| chr15 | 52492861 | 52493670 | 3.36 |
| chr15 | 52500116 | 52501079 | 3.03 |
| chr15 | 52508906 | 52510052 | 4.04 |
| chr15 | 52513628 | 52514864 | 3.36 |
| chr15 | 52544822 | 52545897 | 3.7  |
| chr15 | 52556888 | 52557924 | 3.7  |
| chr15 | 52579597 | 52583046 | 6.05 |
| chr15 | 52586080 | 52588664 | 6.73 |
| chr15 | 52593548 | 52594449 | 3.7  |
| chr15 | 52614145 | 52615809 | 4.04 |
| chr15 | 52623158 | 52624583 | 7.4  |
| chr15 | 52658915 | 52659787 | 4.04 |
| chr15 | 52705912 | 52707465 | 4.37 |

|       |          |          |      |
|-------|----------|----------|------|
| chr15 | 52709864 | 52711052 | 4.71 |
| chr15 | 52737420 | 52738702 | 4.37 |
| chr15 | 52740074 | 52740885 | 3.36 |
| chr15 | 52748544 | 52750326 | 5.38 |
| chr15 | 52774902 | 52775807 | 3.7  |
| chr15 | 52780457 | 52782141 | 4.37 |
| chr15 | 52783151 | 52784317 | 3.7  |
| chr15 | 52784878 | 52785740 | 3.7  |
| chr15 | 52802926 | 52803857 | 3.36 |
| chr15 | 52814219 | 52815033 | 3.36 |
| chr15 | 52817326 | 52818595 | 4.71 |
| chr15 | 52819558 | 52822101 | 4.37 |
| chr15 | 52832118 | 52833181 | 3.03 |
| chr15 | 52834721 | 52835705 | 4.04 |
| chr15 | 52838901 | 52839939 | 4.04 |
| chr15 | 52846355 | 52847270 | 4.04 |
| chr15 | 52848674 | 52849764 | 4.37 |
| chr15 | 52857140 | 52858271 | 3.36 |
| chr15 | 52859725 | 52862160 | 5.05 |
| chr15 | 52920144 | 52921252 | 3.7  |
| chr15 | 52924425 | 52925690 | 3.7  |
| chr15 | 52932497 | 52933392 | 4.71 |
| chr15 | 52934618 | 52935333 | 3.03 |
| chr15 | 52938288 | 52939340 | 4.04 |
| chr15 | 52943216 | 52944332 | 2.69 |
| chr15 | 52945071 | 52947194 | 5.72 |
| chr15 | 52948048 | 52950057 | 4.71 |
| chr15 | 52969368 | 52973133 | 5.38 |
| chr15 | 52978197 | 52979207 | 4.04 |
| chr15 | 52986953 | 52988312 | 5.38 |
| chr15 | 53002031 | 53003298 | 4.71 |
| chr15 | 53004456 | 53005355 | 3.7  |
| chr15 | 53023620 | 53024422 | 2.69 |
| chr15 | 53027215 | 53028050 | 5.72 |
| chr15 | 53038098 | 53038939 | 4.37 |
| chr15 | 53055080 | 53055999 | 3.03 |
| chr15 | 53079709 | 53081529 | 4.71 |
| chr15 | 53094169 | 53096792 | 5.05 |
| chr15 | 53102490 | 53103736 | 4.04 |
| chr15 | 53114117 | 53115962 | 4.04 |
| chr15 | 53116269 | 53117253 | 3.7  |
| chr15 | 53139306 | 53140403 | 4.37 |
| chr15 | 53147483 | 53148796 | 4.71 |

|       |          |          |      |
|-------|----------|----------|------|
| chr15 | 53151092 | 53151921 | 3.36 |
| chr15 | 53155698 | 53156591 | 3.36 |
| chr15 | 53158317 | 53161919 | 4.71 |
| chr15 | 53166825 | 53168763 | 3.7  |
| chr15 | 53176523 | 53177368 | 4.71 |
| chr15 | 53217459 | 53218242 | 3.7  |
| chr15 | 53225396 | 53226443 | 3.7  |
| chr15 | 53227761 | 53228633 | 4.37 |
| chr15 | 53231480 | 53232457 | 3.36 |
| chr15 | 53241120 | 53242579 | 4.71 |
| chr15 | 53269270 | 53270764 | 3.36 |
| chr15 | 53312633 | 53313664 | 3.03 |
| chr15 | 53321174 | 53322476 | 4.04 |
| chr15 | 53348865 | 53350226 | 3.36 |
| chr15 | 53363420 | 53365263 | 5.05 |
| chr15 | 53372671 | 53373656 | 3.03 |
| chr15 | 53407064 | 53407831 | 1.68 |
| chr15 | 53468730 | 53469542 | 3.36 |
| chr15 | 53474410 | 53475217 | 2.35 |
| chr15 | 53573012 | 53574627 | 4.04 |
| chr15 | 53661325 | 53662714 | 5.72 |
| chr15 | 53677345 | 53678426 | 3.7  |
| chr15 | 53699950 | 53701052 | 4.04 |
| chr15 | 53713414 | 53714483 | 4.37 |
| chr15 | 53844905 | 53845709 | 2.69 |
| chr15 | 53846075 | 53846916 | 1.68 |
| chr15 | 53879548 | 53880381 | 3.36 |
| chr15 | 53924013 | 53925171 | 3.7  |
| chr15 | 53969229 | 53970092 | 3.36 |
| chr15 | 54022866 | 54023783 | 3.03 |
| chr15 | 54074637 | 54075599 | 3.36 |
| chr15 | 54099794 | 54100815 | 4.37 |
| chr15 | 54115465 | 54117717 | 8.07 |
| chr15 | 54124989 | 54126086 | 3.7  |
| chr15 | 54129145 | 54130329 | 5.05 |
| chr15 | 54306134 | 54307259 | 3.7  |
| chr15 | 54327785 | 54328771 | 2.69 |
| chr15 | 54466443 | 54467198 | 3.7  |
| chr15 | 54475717 | 54476621 | 3.7  |
| chr15 | 54521275 | 54522167 | 3.7  |
| chr15 | 54545580 | 54546983 | 4.04 |
| chr15 | 56306647 | 56307697 | 6.05 |
| chr15 | 56416880 | 56417889 | 3.7  |

|       |          |          |      |
|-------|----------|----------|------|
| chr15 | 56418422 | 56419571 | 3.7  |
| chr15 | 56431174 | 56432095 | 8.41 |
| chr15 | 56523718 | 56525180 | 7.74 |
| chr15 | 56537738 | 56538947 | 6.05 |
| chr15 | 57025178 | 57026893 | 4.71 |
| chr15 | 58664055 | 58664972 | 5.05 |
| chr15 | 59056194 | 59057187 | 4.37 |
| chr15 | 60353390 | 60354790 | 5.05 |
| chr15 | 62042218 | 62043228 | 4.37 |
| chr15 | 62553436 | 62555436 | 6.39 |
| chr15 | 63124086 | 63125253 | 4.71 |
| chr15 | 63188092 | 63190138 | 5.38 |
| chr15 | 63334903 | 63336342 | 3.03 |
| chr15 | 63410847 | 63412523 | 5.72 |
| chr15 | 63795924 | 63797501 | 7.4  |
| chr15 | 64218520 | 64219328 | 2.69 |
| chr15 | 64342275 | 64343211 | 4.71 |
| chr15 | 64679522 | 64680552 | 5.05 |
| chr15 | 64751924 | 64754096 | 5.72 |
| chr15 | 64872672 | 64874248 | 4.37 |
| chr15 | 64932125 | 64933303 | 3.7  |
| chr15 | 65192812 | 65194165 | 4.71 |
| chr15 | 65197318 | 65198323 | 4.04 |
| chr15 | 65428885 | 65430643 | 6.05 |
| chr15 | 65476006 | 65477319 | 4.04 |
| chr15 | 65588126 | 65588939 | 4.37 |
| chr15 | 65595731 | 65596918 | 4.37 |
| chr15 | 65643711 | 65645569 | 9.75 |
| chr15 | 65809463 | 65810694 | 3.03 |
| chr15 | 65902815 | 65904170 | 6.39 |
| chr15 | 65932010 | 65932810 | 1.01 |
| chr15 | 66033734 | 66034588 | 2.02 |
| chr15 | 66084412 | 66085287 | 3.03 |
| chr15 | 66124755 | 66126009 | 4.37 |
| chr15 | 66161290 | 66162291 | 4.71 |
| chr15 | 66191509 | 66192319 | 1.35 |
| chr15 | 66196284 | 66197335 | 2.02 |
| chr15 | 66201703 | 66202552 | 1.35 |
| chr15 | 66316377 | 66317243 | 2.35 |
| chr15 | 66320122 | 66321168 | 3.36 |
| chr15 | 66433914 | 66434719 | 1.35 |
| chr15 | 66583964 | 66585166 | 1.68 |
| chr15 | 66679225 | 66680765 | 2.02 |

|       |          |          |       |
|-------|----------|----------|-------|
| chr15 | 66789738 | 66791293 | 3.7   |
| chr15 | 66795881 | 66796579 | 2.69  |
| chr15 | 66992894 | 66993866 | 3.36  |
| chr15 | 66994477 | 66995288 | 3.36  |
| chr15 | 67002627 | 67003607 | 2.35  |
| chr15 | 67047237 | 67048609 | 3.7   |
| chr15 | 67057721 | 67058637 | 3.7   |
| chr15 | 67062908 | 67063694 | 2.02  |
| chr15 | 67169802 | 67170654 | 2.35  |
| chr15 | 67180959 | 67182711 | 9.42  |
| chr15 | 67305245 | 67306034 | 1.01  |
| chr15 | 67315554 | 67317288 | 5.05  |
| chr15 | 67357484 | 67358695 | 4.04  |
| chr15 | 67372680 | 67373676 | 2.35  |
| chr15 | 67403359 | 67404238 | 4.37  |
| chr15 | 67417206 | 67418606 | 5.05  |
| chr15 | 67441923 | 67443083 | 4.04  |
| chr15 | 67533577 | 67534444 | 1.01  |
| chr15 | 67546675 | 67547526 | 3.7   |
| chr15 | 67826120 | 67827027 | 1.68  |
| chr15 | 67836495 | 67837306 | 3.03  |
| chr15 | 67976275 | 67978756 | 12.78 |
| chr15 | 68125601 | 68126561 | 2.69  |
| chr15 | 68131657 | 68133390 | 40.7  |
| chr15 | 68161222 | 68162579 | 3.7   |
| chr15 | 68187250 | 68188196 | 2.69  |
| chr15 | 68210498 | 68211987 | 8.75  |
| chr15 | 68279341 | 68280279 | 2.02  |
| chr15 | 68337556 | 68339233 | 5.72  |
| chr15 | 68430031 | 68430729 | 2.69  |
| chr15 | 68521298 | 68522419 | 2.69  |
| chr15 | 68536215 | 68537338 | 4.04  |
| chr15 | 68569471 | 68570635 | 5.05  |
| chr15 | 68577135 | 68578161 | 3.7   |
| chr15 | 68631796 | 68632632 | 2.02  |
| chr15 | 68830627 | 68832142 | 2.35  |
| chr15 | 68870023 | 68870916 | 2.35  |
| chr15 | 68892549 | 68893973 | 1.68  |
| chr15 | 68991389 | 68992225 | 1.35  |
| chr15 | 69109204 | 69110259 | 4.04  |
| chr15 | 69149013 | 69150598 | 4.71  |
| chr15 | 69270916 | 69271734 | 4.04  |
| chr15 | 69299328 | 69302722 | 16.15 |

|       |          |          |       |
|-------|----------|----------|-------|
| chr15 | 69366379 | 69367679 | 5.38  |
| chr15 | 69396005 | 69396803 | 2.69  |
| chr15 | 69420705 | 69421917 | 2.35  |
| chr15 | 69533543 | 69534715 | 2.02  |
| chr15 | 69628870 | 69630184 | 4.71  |
| chr15 | 69706119 | 69707771 | 4.04  |
| chr15 | 69744441 | 69745291 | 2.02  |
| chr15 | 69759912 | 69760688 | 3.36  |
| chr15 | 69773161 | 69774297 | 4.71  |
| chr15 | 69776048 | 69778058 | 5.05  |
| chr15 | 69843227 | 69845224 | 10.09 |
| chr15 | 69885719 | 69886966 | 4.04  |
| chr15 | 69915171 | 69916263 | 3.7   |
| chr15 | 69960139 | 69960997 | 1.35  |
| chr15 | 70036677 | 70037667 | 2.02  |
| chr15 | 70111344 | 70112328 | 1.01  |
| chr15 | 70166169 | 70167013 | 2.02  |
| chr15 | 70216746 | 70217697 | 3.7   |
| chr15 | 70263070 | 70263878 | 1.68  |
| chr15 | 70294685 | 70295764 | 4.71  |
| chr15 | 70383813 | 70387588 | 4.37  |
| chr15 | 70433023 | 70433836 | 3.7   |
| chr15 | 70488388 | 70489777 | 4.37  |
| chr15 | 70517128 | 70518356 | 2.35  |
| chr15 | 70523267 | 70524550 | 4.04  |
| chr15 | 70537382 | 70538108 | 1.35  |
| chr15 | 70583418 | 70584450 | 3.36  |
| chr15 | 70615731 | 70617417 | 4.37  |
| chr15 | 70626064 | 70627450 | 4.37  |
| chr15 | 70635892 | 70636846 | 4.04  |
| chr15 | 70640722 | 70641874 | 3.36  |
| chr15 | 70649023 | 70650283 | 3.36  |
| chr15 | 70666519 | 70668180 | 4.71  |
| chr15 | 70670169 | 70671144 | 4.04  |
| chr15 | 70673321 | 70674611 | 3.36  |
| chr15 | 70697841 | 70698874 | 3.36  |
| chr15 | 70710331 | 70711387 | 3.7   |
| chr15 | 70714384 | 70715206 | 4.04  |
| chr15 | 70716595 | 70717654 | 3.7   |
| chr15 | 70719367 | 70720538 | 4.37  |
| chr15 | 70754238 | 70755923 | 4.37  |
| chr15 | 70762815 | 70763646 | 2.69  |
| chr15 | 70769221 | 70770208 | 2.35  |

|       |          |          |       |
|-------|----------|----------|-------|
| chr15 | 70797822 | 70801581 | 4.04  |
| chr15 | 70801838 | 70803334 | 4.37  |
| chr15 | 70804634 | 70805419 | 2.69  |
| chr15 | 70818699 | 70819582 | 3.03  |
| chr15 | 70820244 | 70821243 | 3.36  |
| chr15 | 70914205 | 70915533 | 3.7   |
| chr15 | 70919991 | 70920821 | 2.69  |
| chr15 | 70969853 | 70971455 | 2.02  |
| chr15 | 70972343 | 70973346 | 1.68  |
| chr15 | 71091026 | 71092826 | 4.04  |
| chr15 | 71116658 | 71117662 | 3.03  |
| chr15 | 71146442 | 71147512 | 3.36  |
| chr15 | 71149820 | 71150671 | 2.69  |
| chr15 | 71167058 | 71168060 | 3.36  |
| chr15 | 71184378 | 71185508 | 4.71  |
| chr15 | 71198991 | 71201657 | 13.45 |
| chr15 | 71290390 | 71292738 | 4.37  |
| chr15 | 71348108 | 71349844 | 4.37  |
| chr15 | 71353844 | 71355097 | 4.04  |
| chr15 | 71363370 | 71365711 | 4.37  |
| chr15 | 71368463 | 71370637 | 4.04  |
| chr15 | 71370875 | 71372613 | 3.36  |
| chr15 | 71375535 | 71377196 | 5.05  |
| chr15 | 71378006 | 71379470 | 3.36  |
| chr15 | 71380577 | 71381669 | 3.7   |
| chr15 | 71388492 | 71389997 | 7.06  |
| chr15 | 71397758 | 71399298 | 3.36  |
| chr15 | 71406422 | 71407673 | 3.7   |
| chr15 | 71408031 | 71409243 | 3.7   |
| chr15 | 71418926 | 71419877 | 3.7   |
| chr15 | 71459318 | 71460127 | 4.04  |
| chr15 | 71462784 | 71464821 | 5.05  |
| chr15 | 71465134 | 71466133 | 3.7   |
| chr15 | 71543522 | 71545850 | 3.7   |
| chr15 | 71563831 | 71564715 | 3.03  |
| chr15 | 71581493 | 71582417 | 1.35  |
| chr15 | 71586939 | 71588492 | 7.06  |
| chr15 | 71621136 | 71622010 | 1.68  |
| chr15 | 71753303 | 71754355 | 3.36  |
| chr15 | 71796535 | 71797318 | 2.35  |
| chr15 | 71877287 | 71878358 | 4.37  |
| chr15 | 71903422 | 71904463 | 1.35  |
| chr15 | 71971843 | 71972733 | 3.36  |

|       |          |          |      |
|-------|----------|----------|------|
| chr15 | 72052031 | 72053026 | 2.35 |
| chr15 | 72099235 | 72100443 | 4.04 |
| chr15 | 72113083 | 72115120 | 5.38 |
| chr15 | 72222696 | 72224446 | 7.4  |
| chr15 | 72238016 | 72238876 | 1.68 |
| chr15 | 72369073 | 72369905 | 2.35 |
| chr15 | 72409686 | 72411478 | 3.7  |
| chr15 | 72447340 | 72448675 | 4.37 |
| chr15 | 72460113 | 72460910 | 2.69 |
| chr15 | 72476524 | 72477570 | 3.03 |
| chr15 | 72520803 | 72522103 | 4.71 |
| chr15 | 72523128 | 72524505 | 4.71 |
| chr15 | 72527021 | 72528033 | 2.35 |
| chr15 | 72553867 | 72554657 | 1.01 |
| chr15 | 72564828 | 72565672 | 3.36 |
| chr15 | 72574774 | 72575633 | 3.36 |
| chr15 | 72650907 | 72652098 | 4.04 |
| chr15 | 72719307 | 72720891 | 4.04 |
| chr15 | 72765368 | 72767730 | 4.04 |
| chr15 | 72873262 | 72874019 | 1.68 |
| chr15 | 72977906 | 72979111 | 4.04 |
| chr15 | 73088725 | 73089860 | 3.7  |
| chr15 | 73130332 | 73131104 | 1.68 |
| chr15 | 73133067 | 73134161 | 2.69 |
| chr15 | 73173989 | 73175467 | 6.73 |
| chr15 | 73239524 | 73240882 | 3.36 |
| chr15 | 73254133 | 73255544 | 4.37 |
| chr15 | 73343201 | 73345277 | 3.36 |
| chr15 | 73416298 | 73417274 | 1.68 |
| chr15 | 73446469 | 73448781 | 5.38 |
| chr15 | 73533753 | 73534560 | 2.02 |
| chr15 | 73610247 | 73611118 | 2.02 |
| chr15 | 73638789 | 73640624 | 4.04 |
| chr15 | 73654659 | 73655467 | 2.02 |
| chr15 | 73656045 | 73656910 | 2.02 |
| chr15 | 73660587 | 73661615 | 3.36 |
| chr15 | 73670346 | 73671318 | 4.37 |
| chr15 | 73679084 | 73679889 | 2.69 |
| chr15 | 73721866 | 73722688 | 1.68 |
| chr15 | 73893977 | 73894986 | 3.7  |
| chr15 | 73903699 | 73904606 | 2.69 |
| chr15 | 73907051 | 73908064 | 2.02 |
| chr15 | 74035038 | 74035969 | 4.37 |



|       |          |          |      |
|-------|----------|----------|------|
| chr15 | 74067126 | 74068078 | 3.36 |
| chr15 | 74099975 | 74100780 | 2.69 |
| chr15 | 74101611 | 74102573 | 2.69 |
| chr15 | 74114849 | 74116013 | 4.37 |
| chr15 | 74133970 | 74134714 | 1.68 |
| chr15 | 74149153 | 74150148 | 4.37 |
| chr15 | 74156363 | 74157390 | 2.02 |
| chr15 | 74160889 | 74161959 | 2.02 |
| chr15 | 74183958 | 74184840 | 3.36 |
| chr15 | 74200451 | 74201408 | 3.36 |
| chr15 | 74210800 | 74211794 | 3.7  |
| chr15 | 74218382 | 74220004 | 3.7  |
| chr15 | 74258486 | 74259630 | 1.35 |
| chr15 | 74425118 | 74426885 | 4.71 |
| chr15 | 74477644 | 74478880 | 3.03 |
| chr15 | 74487670 | 74489092 | 4.04 |
| chr15 | 74511890 | 74513254 | 2.69 |
| chr15 | 74516434 | 74517317 | 2.69 |
| chr15 | 74531899 | 74533166 | 3.36 |
| chr15 | 74548007 | 74549635 | 3.03 |
| chr15 | 74574120 | 74575479 | 2.35 |
| chr15 | 74583336 | 74584776 | 3.03 |
| chr15 | 74641559 | 74642815 | 3.36 |
| chr15 | 74645598 | 74647034 | 6.39 |
| chr15 | 74685682 | 74687127 | 2.02 |
| chr15 | 74688935 | 74690731 | 4.71 |
| chr15 | 74698790 | 74700034 | 4.37 |
| chr15 | 74719944 | 74720905 | 2.35 |
| chr15 | 74723352 | 74724504 | 2.35 |
| chr15 | 74728080 | 74729126 | 2.69 |
| chr15 | 74740262 | 74740988 | 1.68 |
| chr15 | 74752994 | 74754215 | 5.05 |
| chr15 | 74794217 | 74795102 | 2.02 |
| chr15 | 74809238 | 74810338 | 4.04 |
| chr15 | 74816090 | 74817028 | 2.02 |
| chr15 | 74837966 | 74839369 | 6.05 |
| chr15 | 74840679 | 74841478 | 2.69 |
| chr15 | 74855663 | 74856588 | 2.35 |
| chr15 | 74898846 | 74899693 | 2.69 |
| chr15 | 74902491 | 74903463 | 3.03 |
| chr15 | 74906795 | 74908313 | 3.7  |
| chr15 | 74913223 | 74914038 | 4.37 |
| chr15 | 74923206 | 74924495 | 3.36 |

|       |          |          |       |
|-------|----------|----------|-------|
| chr15 | 75015814 | 75017062 | 4.71  |
| chr15 | 75017434 | 75018760 | 4.04  |
| chr15 | 75022496 | 75023777 | 2.35  |
| chr15 | 75067389 | 75068240 | 2.69  |
| chr15 | 75073651 | 75075062 | 4.04  |
| chr15 | 75080866 | 75082554 | 5.72  |
| chr15 | 75107154 | 75110359 | 4.71  |
| chr15 | 75111156 | 75112009 | 3.36  |
| chr15 | 75113108 | 75114192 | 4.04  |
| chr15 | 75122707 | 75124384 | 3.36  |
| chr15 | 75134902 | 75136488 | 4.04  |
| chr15 | 75145053 | 75145913 | 4.04  |
| chr15 | 75173341 | 75176364 | 6.73  |
| chr15 | 75194154 | 75195036 | 3.36  |
| chr15 | 75197892 | 75199325 | 5.05  |
| chr15 | 75229733 | 75230912 | 4.37  |
| chr15 | 75237715 | 75238579 | 2.02  |
| chr15 | 75248041 | 75249510 | 4.04  |
| chr15 | 75287737 | 75288573 | 2.69  |
| chr15 | 75307185 | 75308141 | 4.71  |
| chr15 | 75328110 | 75329293 | 3.7   |
| chr15 | 75367647 | 75369873 | 5.72  |
| chr15 | 75409561 | 75410559 | 3.7   |
| chr15 | 75432389 | 75433877 | 3.36  |
| chr15 | 75434080 | 75441688 | 17.49 |
| chr15 | 75473766 | 75475018 | 4.37  |
| chr15 | 75493177 | 75495697 | 6.39  |
| chr15 | 75516133 | 75517018 | 2.02  |
| chr15 | 75524008 | 75525733 | 2.35  |
| chr15 | 75603551 | 75604438 | 1.35  |
| chr15 | 75658663 | 75661731 | 7.4   |
| chr15 | 75698963 | 75699970 | 2.35  |
| chr15 | 75746187 | 75746941 | 2.69  |
| chr15 | 75776520 | 75777340 | 2.35  |
| chr15 | 75870210 | 75872375 | 4.71  |
| chr15 | 75912716 | 75913720 | 4.04  |
| chr15 | 75932029 | 75933036 | 3.7   |
| chr15 | 75939294 | 75940513 | 4.37  |
| chr15 | 76098366 | 76099237 | 2.02  |
| chr15 | 76195455 | 76197029 | 5.05  |
| chr15 | 76303871 | 76304686 | 2.69  |
| chr15 | 76350922 | 76352060 | 5.05  |
| chr15 | 76558895 | 76560560 | 4.37  |

|       |          |          |      |
|-------|----------|----------|------|
| chr15 | 76560831 | 76561616 | 4.04 |
| chr15 | 76603115 | 76604415 | 3.7  |
| chr15 | 76604642 | 76606562 | 4.71 |
| chr15 | 76626067 | 76626931 | 3.7  |
| chr15 | 76638099 | 76639042 | 3.03 |
| chr15 | 76677262 | 76678179 | 2.35 |
| chr15 | 76682366 | 76685088 | 4.71 |
| chr15 | 76741425 | 76742305 | 2.69 |
| chr15 | 76757507 | 76759015 | 4.37 |
| chr15 | 76826226 | 76827213 | 3.7  |
| chr15 | 76927802 | 76928891 | 3.7  |
| chr15 | 77055374 | 77056835 | 2.69 |
| chr15 | 77125743 | 77126599 | 3.36 |
| chr15 | 77143747 | 77145569 | 4.37 |
| chr15 | 77208148 | 77208991 | 1.35 |
| chr15 | 77230580 | 77231383 | 2.35 |
| chr15 | 77294813 | 77295756 | 2.35 |
| chr15 | 77328188 | 77329152 | 3.7  |
| chr15 | 77362466 | 77364258 | 2.69 |
| chr15 | 77399213 | 77400454 | 3.36 |
| chr15 | 77432176 | 77433026 | 3.7  |
| chr15 | 77453022 | 77454155 | 4.37 |
| chr15 | 77491062 | 77492236 | 4.71 |
| chr15 | 77515968 | 77517001 | 2.02 |
| chr15 | 77612313 | 77613077 | 3.36 |
| chr15 | 77621625 | 77622461 | 2.02 |
| chr15 | 77687995 | 77690050 | 3.7  |
| chr15 | 77690566 | 77691864 | 3.03 |
| chr15 | 77711235 | 77712584 | 6.39 |
| chr15 | 77720096 | 77721223 | 1.68 |
| chr15 | 77788766 | 77789862 | 3.7  |
| chr15 | 77795231 | 77797496 | 4.71 |
| chr15 | 77835592 | 77836612 | 3.36 |
| chr15 | 77908813 | 77909834 | 2.69 |
| chr15 | 77920373 | 77921086 | 2.69 |
| chr15 | 77922253 | 77923528 | 3.7  |
| chr15 | 77925308 | 77926690 | 5.72 |
| chr15 | 77933250 | 77934378 | 1.35 |
| chr15 | 77945639 | 77948093 | 4.37 |
| chr15 | 77960638 | 77961480 | 2.02 |
| chr15 | 77994596 | 77995617 | 3.7  |
| chr15 | 78015728 | 78016537 | 2.02 |
| chr15 | 78046515 | 78047579 | 2.69 |

|       |          |          |      |
|-------|----------|----------|------|
| chr15 | 78076288 | 78077262 | 2.35 |
| chr15 | 78090114 | 78091069 | 2.35 |
| chr15 | 78123834 | 78125990 | 4.37 |
| chr15 | 78358278 | 78359371 | 4.37 |
| chr15 | 78362351 | 78363320 | 3.36 |
| chr15 | 78414310 | 78415136 | 2.69 |
| chr15 | 78415408 | 78416351 | 3.36 |
| chr15 | 78423302 | 78424586 | 3.03 |
| chr15 | 78482745 | 78485196 | 3.36 |
| chr15 | 78508650 | 78509893 | 4.71 |
| chr15 | 78512272 | 78513016 | 1.35 |
| chr15 | 78591327 | 78592144 | 3.7  |
| chr15 | 78657280 | 78658994 | 2.69 |
| chr15 | 78675841 | 78676825 | 4.04 |
| chr15 | 78698721 | 78699867 | 2.35 |
| chr15 | 78729679 | 78730461 | 3.03 |
| chr15 | 78749231 | 78750149 | 3.03 |
| chr15 | 78799590 | 78800484 | 2.35 |
| chr15 | 78815989 | 78817241 | 4.37 |
| chr15 | 78840641 | 78841960 | 2.35 |
| chr15 | 78857691 | 78859426 | 5.05 |
| chr15 | 78910786 | 78912565 | 2.35 |
| chr15 | 78915592 | 78916446 | 2.02 |
| chr15 | 78925979 | 78926928 | 1.35 |
| chr15 | 78976373 | 78977280 | 4.04 |
| chr15 | 79101105 | 79102032 | 3.7  |
| chr15 | 79165466 | 79166884 | 5.05 |
| chr15 | 79222812 | 79224460 | 3.7  |
| chr15 | 79225190 | 79226220 | 3.7  |
| chr15 | 79243880 | 79244831 | 2.35 |
| chr15 | 79263381 | 79264478 | 4.37 |
| chr15 | 79264781 | 79265742 | 2.35 |
| chr15 | 79281665 | 79283460 | 1.68 |
| chr15 | 79303288 | 79304313 | 4.37 |
| chr15 | 79352692 | 79353767 | 2.69 |
| chr15 | 79376920 | 79377788 | 2.35 |
| chr15 | 79434123 | 79439138 | 5.72 |
| chr15 | 79471055 | 79472326 | 3.03 |
| chr15 | 79495725 | 79496499 | 2.02 |
| chr15 | 79512519 | 79513296 | 2.02 |
| chr15 | 79521129 | 79522289 | 4.37 |
| chr15 | 79621029 | 79622144 | 4.04 |
| chr15 | 79624904 | 79626158 | 5.05 |

|       |          |          |       |
|-------|----------|----------|-------|
| chr15 | 79715239 | 79716058 | 3.7   |
| chr15 | 79772405 | 79773266 | 2.35  |
| chr15 | 79899968 | 79901123 | 2.35  |
| chr15 | 79967845 | 79968820 | 2.69  |
| chr15 | 80167312 | 80169082 | 5.72  |
| chr15 | 80169645 | 80171758 | 10.09 |
| chr15 | 80187947 | 80190028 | 5.72  |
| chr15 | 80206010 | 80213477 | 13.12 |
| chr15 | 80213705 | 80216385 | 3.7   |
| chr15 | 80351516 | 80353222 | 3.7   |
| chr15 | 80409079 | 80409915 | 1.01  |
| chr15 | 80448704 | 80449772 | 2.69  |
| chr15 | 80523569 | 80524716 | 1.35  |
| chr15 | 80557020 | 80558051 | 2.69  |
| chr15 | 80627199 | 80628499 | 5.05  |
| chr15 | 80659291 | 80661245 | 6.05  |
| chr15 | 80680948 | 80681818 | 2.35  |
| chr15 | 80695461 | 80696919 | 3.03  |
| chr15 | 80767942 | 80768832 | 3.7   |
| chr15 | 80773858 | 80774798 | 2.02  |
| chr15 | 80787556 | 80788481 | 4.04  |
| chr15 | 80892670 | 80893475 | 2.02  |
| chr15 | 80914087 | 80916126 | 4.04  |
| chr15 | 80932774 | 80934033 | 4.37  |
| chr15 | 80987453 | 80989101 | 3.36  |
| chr15 | 81029687 | 81030832 | 3.03  |
| chr15 | 81034466 | 81036568 | 5.72  |
| chr15 | 81041582 | 81042775 | 5.38  |
| chr15 | 81068608 | 81070404 | 4.71  |
| chr15 | 81072016 | 81072908 | 1.68  |
| chr15 | 81073933 | 81074773 | 2.02  |
| chr15 | 81096038 | 81098205 | 5.38  |
| chr15 | 81104489 | 81105571 | 2.02  |
| chr15 | 81129343 | 81130342 | 1.68  |
| chr15 | 81135705 | 81136810 | 1.68  |
| chr15 | 81189631 | 81190783 | 2.02  |
| chr15 | 81217002 | 81218081 | 2.02  |
| chr15 | 81235184 | 81236399 | 5.72  |
| chr15 | 81288275 | 81289213 | 5.05  |
| chr15 | 81292752 | 81294500 | 3.7   |
| chr15 | 81382078 | 81382971 | 2.69  |
| chr15 | 81466151 | 81466930 | 3.03  |
| chr15 | 81499829 | 81501082 | 4.71  |

|       |          |          |      |
|-------|----------|----------|------|
| chr15 | 81570724 | 81573372 | 4.37 |
| chr15 | 81574110 | 81575199 | 4.71 |
| chr15 | 81616169 | 81617270 | 1.35 |
| chr15 | 81651536 | 81652637 | 2.02 |
| chr15 | 81702245 | 81703131 | 4.04 |
| chr15 | 81756455 | 81758664 | 3.7  |
| chr15 | 81785645 | 81786635 | 3.36 |
| chr15 | 81885048 | 81885775 | 2.35 |
| chr15 | 81892476 | 81894635 | 7.4  |
| chr15 | 81925975 | 81927621 | 4.71 |
| chr15 | 81943870 | 81945168 | 4.04 |
| chr15 | 82016066 | 82018773 | 5.05 |
| chr15 | 82044507 | 82045768 | 4.04 |
| chr15 | 82182924 | 82183882 | 2.35 |
| chr15 | 82207061 | 82207932 | 3.03 |
| chr15 | 82209162 | 82211928 | 4.71 |
| chr15 | 82213074 | 82214185 | 4.37 |
| chr15 | 82231573 | 82232859 | 4.71 |
| chr15 | 82260369 | 82261208 | 3.36 |
| chr15 | 82284398 | 82285668 | 3.7  |
| chr15 | 82338479 | 82339342 | 3.7  |
| chr15 | 82364728 | 82366054 | 4.04 |
| chr15 | 82476360 | 82477272 | 2.35 |
| chr15 | 83167358 | 83168190 | 4.04 |
| chr15 | 83234943 | 83236128 | 4.37 |
| chr15 | 83266120 | 83267287 | 3.7  |
| chr15 | 83316209 | 83317306 | 4.04 |
| chr15 | 83331609 | 83332645 | 4.04 |
| chr15 | 83377726 | 83379238 | 3.7  |
| chr15 | 83418958 | 83419889 | 4.04 |
| chr15 | 83477624 | 83479308 | 4.04 |
| chr15 | 83516021 | 83517193 | 1.68 |
| chr15 | 83540989 | 83541924 | 1.35 |
| chr15 | 83563361 | 83564436 | 4.04 |
| chr15 | 83576683 | 83578717 | 4.71 |
| chr15 | 83604460 | 83605351 | 3.7  |
| chr15 | 83610355 | 83612339 | 5.72 |
| chr15 | 83620780 | 83621656 | 3.7  |
| chr15 | 83679092 | 83680424 | 4.04 |
| chr15 | 83733244 | 83737546 | 5.05 |
| chr15 | 83741732 | 83743306 | 9.08 |
| chr15 | 83775159 | 83776712 | 2.35 |
| chr15 | 83794110 | 83794954 | 1.68 |

|       |          |          |       |
|-------|----------|----------|-------|
| chr15 | 83834452 | 83835863 | 4.04  |
| chr15 | 83870932 | 83871847 | 3.7   |
| chr15 | 83878203 | 83880299 | 6.73  |
| chr15 | 83902516 | 83903584 | 2.69  |
| chr15 | 83905730 | 83907396 | 4.71  |
| chr15 | 83918082 | 83919347 | 2.35  |
| chr15 | 83927662 | 83928725 | 2.69  |
| chr15 | 83971698 | 83972966 | 2.69  |
| chr15 | 84016044 | 84016801 | 2.02  |
| chr15 | 84020982 | 84022289 | 4.04  |
| chr15 | 84117599 | 84118653 | 2.35  |
| chr15 | 84157587 | 84158426 | 2.35  |
| chr15 | 84196181 | 84198593 | 3.7   |
| chr15 | 84229765 | 84230713 | 2.69  |
| chr15 | 84232557 | 84233613 | 2.69  |
| chr15 | 84299783 | 84300913 | 4.71  |
| chr15 | 84321578 | 84322528 | 3.36  |
| chr15 | 84421396 | 84423458 | 4.37  |
| chr15 | 84425552 | 84427793 | 8.75  |
| chr15 | 84623240 | 84624599 | 3.03  |
| chr15 | 84638691 | 84639740 | 3.36  |
| chr15 | 84645442 | 84646736 | 5.72  |
| chr15 | 84680825 | 84682696 | 5.05  |
| chr15 | 85130921 | 85131791 | 3.36  |
| chr15 | 85143168 | 85144732 | 4.04  |
| chr15 | 85163311 | 85166554 | 13.79 |
| chr15 | 85176323 | 85177746 | 4.04  |
| chr15 | 85197168 | 85198611 | 4.37  |
| chr15 | 85201042 | 85203399 | 4.04  |
| chr15 | 85205625 | 85206375 | 3.36  |
| chr15 | 85258319 | 85260054 | 5.72  |
| chr15 | 85277844 | 85279087 | 3.7   |
| chr15 | 85287427 | 85288809 | 1.68  |
| chr15 | 85290138 | 85293460 | 4.37  |
| chr15 | 85295219 | 85296190 | 4.04  |
| chr15 | 85341812 | 85342869 | 2.02  |
| chr15 | 85346741 | 85349688 | 4.37  |
| chr15 | 85360235 | 85361584 | 2.35  |
| chr15 | 85367448 | 85368456 | 1.35  |
| chr15 | 85389200 | 85391110 | 5.05  |
| chr15 | 85400483 | 85401241 | 3.03  |
| chr15 | 85402024 | 85403848 | 4.37  |
| chr15 | 85406988 | 85407696 | 3.7   |

|       |          |          |      |
|-------|----------|----------|------|
| chr15 | 85413260 | 85414263 | 3.7  |
| chr15 | 85421346 | 85422605 | 4.71 |
| chr15 | 85437826 | 85439131 | 6.05 |
| chr15 | 85456029 | 85457173 | 2.35 |
| chr15 | 85457710 | 85458948 | 5.05 |
| chr15 | 85472609 | 85473986 | 6.05 |
| chr15 | 85481570 | 85482475 | 2.35 |
| chr15 | 85483632 | 85484390 | 2.02 |
| chr15 | 85490403 | 85491205 | 3.03 |
| chr15 | 85505418 | 85509576 | 5.38 |
| chr15 | 85510106 | 85511563 | 3.36 |
| chr15 | 85515108 | 85516492 | 4.37 |
| chr15 | 85523082 | 85526275 | 5.05 |
| chr15 | 85531433 | 85532532 | 3.03 |
| chr15 | 85532773 | 85534513 | 2.02 |
| chr15 | 85545532 | 85547162 | 2.35 |
| chr15 | 85553517 | 85554273 | 1.68 |
| chr15 | 85565848 | 85568093 | 3.36 |
| chr15 | 85592440 | 85593421 | 3.36 |
| chr15 | 85600265 | 85603236 | 5.05 |
| chr15 | 85604018 | 85606382 | 3.7  |
| chr15 | 85703862 | 85704791 | 3.7  |
| chr15 | 85706354 | 85708894 | 5.72 |
| chr15 | 85860781 | 85861702 | 2.02 |
| chr15 | 85865836 | 85866782 | 3.03 |
| chr15 | 85873870 | 85875235 | 5.38 |
| chr15 | 85992927 | 85996501 | 6.39 |
| chr15 | 86045574 | 86046584 | 2.35 |
| chr15 | 86086131 | 86087108 | 3.7  |
| chr15 | 86114770 | 86115951 | 2.35 |
| chr15 | 86126086 | 86127066 | 2.35 |
| chr15 | 86132952 | 86133887 | 3.03 |
| chr15 | 86276180 | 86277436 | 4.71 |
| chr15 | 86368514 | 86369812 | 5.05 |
| chr15 | 86438111 | 86438906 | 2.35 |
| chr15 | 86489894 | 86491033 | 3.36 |
| chr15 | 86510125 | 86510994 | 3.7  |
| chr15 | 86533589 | 86534859 | 4.71 |
| chr15 | 86547031 | 86547961 | 1.68 |
| chr15 | 86557822 | 86558764 | 4.04 |
| chr15 | 86689076 | 86690039 | 3.36 |
| chr15 | 86759644 | 86760950 | 5.05 |
| chr15 | 86764013 | 86765150 | 1.68 |



|       |          |          |       |
|-------|----------|----------|-------|
| chr15 | 86802458 | 86803423 | 2.69  |
| chr15 | 86871729 | 86873702 | 6.73  |
| chr15 | 86882043 | 86883080 | 3.7   |
| chr15 | 86982609 | 86983584 | 4.04  |
| chr15 | 86988362 | 86989278 | 2.02  |
| chr15 | 87008313 | 87009262 | 3.7   |
| chr15 | 87037201 | 87038491 | 4.71  |
| chr15 | 87137770 | 87139302 | 4.04  |
| chr15 | 87167524 | 87168739 | 4.37  |
| chr15 | 87338927 | 87339912 | 3.7   |
| chr15 | 87406368 | 87408092 | 4.71  |
| chr15 | 87419958 | 87421110 | 4.04  |
| chr15 | 87454923 | 87457673 | 5.05  |
| chr15 | 87457945 | 87459634 | 4.71  |
| chr15 | 87466821 | 87468084 | 3.7   |
| chr15 | 87476277 | 87477291 | 3.36  |
| chr15 | 87477658 | 87478824 | 4.37  |
| chr15 | 87484353 | 87485700 | 4.37  |
| chr15 | 87488909 | 87489726 | 3.7   |
| chr15 | 87490113 | 87491015 | 4.04  |
| chr15 | 87505806 | 87507112 | 5.05  |
| chr15 | 87534462 | 87535453 | 3.7   |
| chr15 | 87549648 | 87552496 | 4.37  |
| chr15 | 87553391 | 87554915 | 4.04  |
| chr15 | 87555839 | 87557081 | 4.04  |
| chr15 | 87558072 | 87560227 | 5.72  |
| chr15 | 87561565 | 87562833 | 4.71  |
| chr15 | 87563581 | 87565057 | 4.37  |
| chr15 | 87569057 | 87570034 | 3.7   |
| chr15 | 87582576 | 87583797 | 4.04  |
| chr15 | 87584163 | 87585356 | 4.04  |
| chr15 | 87589562 | 87590715 | 3.7   |
| chr15 | 87646047 | 87653610 | 10.43 |
| chr15 | 87683550 | 87686242 | 9.75  |
| chr15 | 87697703 | 87698781 | 4.04  |
| chr15 | 87712658 | 87713473 | 4.37  |
| chr15 | 87715971 | 87717143 | 4.37  |
| chr15 | 87720713 | 87721944 | 5.05  |
| chr15 | 87723856 | 87726521 | 4.37  |
| chr15 | 87728221 | 87729311 | 3.36  |
| chr15 | 87736247 | 87738659 | 4.04  |
| chr15 | 87747414 | 87748781 | 5.05  |
| chr15 | 87749884 | 87752055 | 4.71  |

|       |          |          |      |
|-------|----------|----------|------|
| chr15 | 87768110 | 87769109 | 3.03 |
| chr15 | 87806808 | 87807810 | 4.04 |
| chr15 | 87808235 | 87809115 | 3.36 |
| chr15 | 87815439 | 87818202 | 4.71 |
| chr15 | 87822548 | 87823366 | 3.03 |
| chr15 | 87824044 | 87825611 | 6.05 |
| chr15 | 87844532 | 87845503 | 3.7  |
| chr15 | 87869417 | 87870250 | 3.36 |
| chr15 | 87877364 | 87878467 | 3.7  |
| chr15 | 87891649 | 87892619 | 4.04 |
| chr15 | 87895642 | 87896863 | 4.04 |
| chr15 | 87909001 | 87914209 | 5.72 |
| chr15 | 87917724 | 87920254 | 5.05 |
| chr15 | 87929415 | 87932452 | 4.37 |
| chr15 | 87934958 | 87935794 | 2.35 |
| chr15 | 87938044 | 87939890 | 3.7  |
| chr15 | 87957559 | 87958678 | 3.36 |
| chr15 | 87960180 | 87960951 | 3.36 |
| chr15 | 87999980 | 88000993 | 4.37 |
| chr15 | 88002582 | 88003717 | 3.7  |
| chr15 | 88004613 | 88006762 | 4.37 |
| chr15 | 88025895 | 88028015 | 3.7  |
| chr15 | 88031893 | 88032851 | 3.7  |
| chr15 | 88035444 | 88036219 | 4.04 |
| chr15 | 88037909 | 88039061 | 4.04 |
| chr15 | 88050683 | 88052972 | 3.36 |
| chr15 | 88062557 | 88065423 | 4.71 |
| chr15 | 88066719 | 88067586 | 3.03 |
| chr15 | 88070206 | 88072751 | 5.38 |
| chr15 | 88075424 | 88078348 | 4.04 |
| chr15 | 88087135 | 88088498 | 4.04 |
| chr15 | 88098723 | 88101068 | 4.71 |
| chr15 | 88111869 | 88112742 | 3.36 |
| chr15 | 88140527 | 88141798 | 4.04 |
| chr15 | 88161575 | 88163033 | 4.04 |
| chr15 | 88167465 | 88168960 | 3.36 |
| chr15 | 88199010 | 88199994 | 3.36 |
| chr15 | 88206464 | 88207636 | 4.04 |
| chr15 | 88208459 | 88215784 | 14.8 |
| chr15 | 88218415 | 88219939 | 4.04 |
| chr15 | 88224282 | 88225513 | 4.71 |
| chr15 | 88228437 | 88229650 | 3.7  |
| chr15 | 88238553 | 88240163 | 4.04 |

|       |          |          |      |
|-------|----------|----------|------|
| chr15 | 88268819 | 88269541 | 2.69 |
| chr15 | 88295137 | 88296461 | 3.7  |
| chr15 | 88347844 | 88349374 | 4.37 |
| chr15 | 88351918 | 88353014 | 3.7  |
| chr15 | 88383983 | 88385666 | 3.7  |
| chr15 | 88387394 | 88388212 | 4.04 |
| chr15 | 88526280 | 88527290 | 3.03 |
| chr15 | 88627422 | 88628345 | 2.35 |
| chr15 | 88728030 | 88728931 | 2.69 |
| chr15 | 88786870 | 88788344 | 3.36 |
| chr15 | 88869325 | 88870368 | 2.35 |
| chr15 | 88896961 | 88898205 | 3.7  |
| chr15 | 88953559 | 88954520 | 3.03 |
| chr15 | 88986769 | 88990094 | 4.71 |
| chr15 | 88997718 | 88998917 | 3.7  |
| chr15 | 89008627 | 89009915 | 5.72 |
| chr15 | 89027478 | 89029283 | 4.37 |
| chr15 | 89164893 | 89166040 | 4.37 |
| chr15 | 89178949 | 89179905 | 4.04 |
| chr15 | 89181732 | 89182651 | 4.04 |
| chr15 | 89231281 | 89232731 | 3.7  |
| chr15 | 89318329 | 89320617 | 6.39 |
| chr15 | 89346870 | 89347702 | 3.36 |
| chr15 | 89471142 | 89472507 | 8.41 |
| chr15 | 89500848 | 89501588 | 2.35 |
| chr15 | 89508412 | 89509214 | 2.35 |
| chr15 | 89620098 | 89620902 | 1.35 |
| chr15 | 89644178 | 89644922 | 1.35 |
| chr15 | 89661680 | 89663782 | 3.7  |
| chr15 | 89664006 | 89665389 | 5.38 |
| chr15 | 89682217 | 89683748 | 4.04 |
| chr15 | 89721305 | 89722229 | 2.02 |
| chr15 | 89786598 | 89787897 | 4.37 |
| chr15 | 89877401 | 89879085 | 5.05 |
| chr15 | 89900492 | 89901299 | 3.03 |
| chr15 | 89901737 | 89902797 | 3.03 |
| chr15 | 89904404 | 89905784 | 4.37 |
| chr15 | 89907007 | 89907928 | 3.03 |
| chr15 | 89911693 | 89912552 | 2.02 |
| chr15 | 89919919 | 89923815 | 5.38 |
| chr15 | 89956733 | 89958207 | 4.04 |
| chr15 | 89962175 | 89963434 | 3.7  |
| chr15 | 89968397 | 89969172 | 2.35 |

|       |          |          |      |
|-------|----------|----------|------|
| chr15 | 89973754 | 89975036 | 2.02 |
| chr15 | 89994632 | 89995942 | 4.71 |
| chr15 | 90019806 | 90020683 | 2.35 |
| chr15 | 90047167 | 90048117 | 2.02 |
| chr15 | 90062979 | 90064087 | 3.7  |
| chr15 | 90066196 | 90067229 | 2.69 |
| chr15 | 90080334 | 90081306 | 4.04 |
| chr15 | 90086049 | 90087546 | 4.37 |
| chr15 | 90091131 | 90091969 | 2.35 |
| chr15 | 90117887 | 90119513 | 3.36 |
| chr15 | 90174004 | 90177564 | 5.05 |
| chr15 | 90215771 | 90216565 | 3.03 |
| chr15 | 90233762 | 90234567 | 2.69 |
| chr15 | 90253585 | 90255769 | 4.71 |
| chr15 | 90267658 | 90268731 | 3.7  |
| chr15 | 90294684 | 90295578 | 3.03 |
| chr15 | 90299737 | 90300964 | 5.72 |
| chr15 | 90303834 | 90304762 | 3.7  |
| chr15 | 90306624 | 90307550 | 3.36 |
| chr15 | 90309568 | 90311410 | 4.04 |
| chr15 | 90312569 | 90313231 | 3.7  |
| chr15 | 90317087 | 90318165 | 4.71 |
| chr15 | 90328185 | 90329118 | 3.36 |
| chr15 | 90330547 | 90332274 | 5.05 |
| chr15 | 90380165 | 90381352 | 3.7  |
| chr15 | 90436497 | 90438077 | 6.05 |
| chr15 | 90448665 | 90449810 | 2.35 |
| chr15 | 90471276 | 90472284 | 4.04 |
| chr15 | 90527122 | 90528780 | 8.07 |
| chr15 | 90543752 | 90546307 | 4.04 |
| chr15 | 90554293 | 90557344 | 5.38 |
| chr15 | 90588901 | 90590475 | 3.7  |
| chr15 | 90630555 | 90631921 | 3.03 |
| chr15 | 90640452 | 90642292 | 4.71 |
| chr15 | 90647507 | 90648481 | 3.36 |
| chr15 | 90656851 | 90659235 | 7.74 |
| chr15 | 90700864 | 90702033 | 5.38 |
| chr15 | 90703710 | 90705120 | 4.37 |
| chr15 | 90708315 | 90709877 | 4.37 |
| chr15 | 90727017 | 90728411 | 5.38 |
| chr15 | 90770969 | 90771973 | 2.35 |
| chr15 | 90776015 | 90778300 | 4.04 |
| chr15 | 90806148 | 90806953 | 1.68 |

|       |          |          |      |
|-------|----------|----------|------|
| chr15 | 90858501 | 90859466 | 3.36 |
| chr15 | 90922139 | 90923090 | 3.7  |
| chr15 | 90943781 | 90944815 | 3.36 |
| chr15 | 90955414 | 90956806 | 4.04 |
| chr15 | 91022019 | 91023610 | 3.7  |
| chr15 | 91072892 | 91074145 | 4.71 |
| chr15 | 91119413 | 91120276 | 2.02 |
| chr15 | 91138874 | 91139580 | 1.68 |
| chr15 | 91207888 | 91209496 | 4.04 |
| chr15 | 91259924 | 91261137 | 4.37 |
| chr15 | 91397800 | 91398665 | 2.02 |
| chr15 | 91403632 | 91405383 | 6.05 |
| chr15 | 91411332 | 91412779 | 3.7  |
| chr15 | 91445846 | 91447126 | 3.7  |
| chr15 | 91474675 | 91476535 | 4.71 |
| chr15 | 91536860 | 91539322 | 3.7  |
| chr15 | 91548182 | 91549061 | 2.35 |
| chr15 | 91597894 | 91598859 | 3.36 |
| chr15 | 91622400 | 91623313 | 3.7  |
| chr15 | 91672455 | 91673419 | 2.69 |
| chr15 | 91708575 | 91710044 | 6.39 |
| chr15 | 91782224 | 91783044 | 2.02 |
| chr15 | 91785630 | 91786563 | 3.36 |
| chr15 | 91818617 | 91820143 | 6.73 |
| chr15 | 91832444 | 91833385 | 3.36 |
| chr15 | 91865985 | 91866871 | 3.36 |
| chr15 | 91897711 | 91898793 | 3.36 |
| chr15 | 91973825 | 91975272 | 5.05 |
| chr15 | 91978168 | 91979683 | 4.37 |
| chr15 | 91980365 | 91985601 | 6.73 |
| chr15 | 91986335 | 91987606 | 3.36 |
| chr15 | 91988499 | 91989533 | 4.37 |
| chr15 | 91998330 | 91999924 | 4.37 |
| chr15 | 92036357 | 92037140 | 3.03 |
| chr15 | 92079803 | 92080894 | 5.05 |
| chr15 | 92088493 | 92090000 | 4.04 |
| chr15 | 92098463 | 92099490 | 4.37 |
| chr15 | 92108939 | 92109867 | 3.03 |
| chr15 | 92111605 | 92112551 | 3.36 |
| chr15 | 92113362 | 92114804 | 3.36 |
| chr15 | 92181746 | 92182687 | 3.36 |
| chr15 | 92298743 | 92299662 | 3.36 |
| chr15 | 92305163 | 92306117 | 4.37 |

|       |          |          |       |
|-------|----------|----------|-------|
| chr15 | 92356422 | 92359087 | 7.74  |
| chr15 | 92395759 | 92397227 | 3.36  |
| chr15 | 92445129 | 92446090 | 2.69  |
| chr15 | 92467776 | 92468673 | 1.68  |
| chr15 | 92485907 | 92486678 | 3.7   |
| chr15 | 92496348 | 92497098 | 2.35  |
| chr15 | 92518383 | 92519546 | 3.7   |
| chr15 | 92549472 | 92550308 | 1.68  |
| chr15 | 92552687 | 92553479 | 3.03  |
| chr15 | 92645776 | 92646683 | 2.69  |
| chr15 | 92730921 | 92733371 | 6.39  |
| chr15 | 92924175 | 92925475 | 4.71  |
| chr15 | 92930396 | 92931804 | 2.69  |
| chr15 | 92933090 | 92933986 | 1.35  |
| chr15 | 92934575 | 92935704 | 3.7   |
| chr15 | 92942452 | 92943343 | 1.68  |
| chr15 | 92999583 | 93000548 | 3.36  |
| chr15 | 93011814 | 93012990 | 2.35  |
| chr15 | 93019750 | 93020724 | 1.68  |
| chr15 | 93033086 | 93034419 | 5.38  |
| chr15 | 93087846 | 93088709 | 2.35  |
| chr15 | 93126075 | 93127816 | 4.04  |
| chr15 | 93159647 | 93161596 | 5.05  |
| chr15 | 93181307 | 93182329 | 4.04  |
| chr15 | 93187666 | 93189433 | 4.37  |
| chr15 | 93193795 | 93194789 | 3.7   |
| chr15 | 93231433 | 93232842 | 4.04  |
| chr15 | 93252320 | 93253173 | 4.37  |
| chr15 | 93257333 | 93258563 | 4.37  |
| chr15 | 93289824 | 93291015 | 5.72  |
| chr15 | 93322492 | 93324802 | 10.76 |
| chr15 | 93346423 | 93347995 | 4.71  |
| chr15 | 93351242 | 93354041 | 6.05  |
| chr15 | 93356644 | 93357553 | 4.04  |
| chr15 | 93363126 | 93364935 | 5.05  |
| chr15 | 93412027 | 93414023 | 5.05  |
| chr15 | 93424989 | 93427015 | 4.37  |
| chr15 | 93430450 | 93431483 | 4.04  |
| chr15 | 93442836 | 93444118 | 5.05  |
| chr15 | 93447201 | 93448517 | 4.37  |
| chr15 | 93491079 | 93493758 | 12.11 |
| chr15 | 93615928 | 93617205 | 3.7   |
| chr15 | 93630607 | 93632191 | 4.37  |

|       |          |          |      |
|-------|----------|----------|------|
| chr15 | 93714563 | 93715533 | 2.02 |
| chr15 | 93814084 | 93815631 | 5.05 |
| chr15 | 93892087 | 93893184 | 2.02 |
| chr15 | 93953409 | 93955179 | 2.69 |
| chr15 | 93957042 | 93957864 | 2.35 |
| chr15 | 93970784 | 93971934 | 2.02 |
| chr15 | 94034061 | 94034984 | 4.04 |
| chr15 | 94035706 | 94036816 | 2.35 |
| chr15 | 94056081 | 94057134 | 2.69 |
| chr15 | 94063672 | 94064471 | 1.35 |
| chr15 | 94066546 | 94067416 | 2.35 |
| chr15 | 94070094 | 94071177 | 1.68 |
| chr15 | 94111821 | 94112570 | 1.68 |
| chr15 | 94183647 | 94184497 | 3.03 |
| chr15 | 94213523 | 94214404 | 3.36 |
| chr15 | 94226976 | 94228827 | 5.72 |
| chr15 | 94342113 | 94343109 | 2.02 |
| chr15 | 94358823 | 94359728 | 2.02 |
| chr15 | 94420474 | 94421228 | 2.02 |
| chr15 | 94451926 | 94453811 | 3.36 |
| chr15 | 94491117 | 94492022 | 1.68 |
| chr15 | 94530989 | 94531955 | 2.02 |
| chr15 | 94553081 | 94553909 | 1.68 |
| chr15 | 94618104 | 94619166 | 1.68 |
| chr15 | 94685025 | 94685823 | 2.35 |
| chr15 | 94824990 | 94826206 | 1.35 |
| chr15 | 94832183 | 94833137 | 2.69 |
| chr15 | 94917904 | 94918917 | 1.68 |
| chr15 | 95097931 | 95099222 | 1.68 |
| chr15 | 95119366 | 95120449 | 3.03 |
| chr15 | 95167610 | 95169060 | 2.35 |
| chr15 | 95172754 | 95173593 | 1.68 |
| chr15 | 95183836 | 95184789 | 2.69 |
| chr15 | 95198643 | 95199452 | 1.68 |
| chr15 | 95241916 | 95243121 | 4.71 |
| chr15 | 95330576 | 95331479 | 4.04 |
| chr15 | 95334558 | 95337297 | 5.72 |
| chr15 | 95344208 | 95349462 | 4.71 |
| chr15 | 95372841 | 95374324 | 3.36 |
| chr15 | 95383611 | 95385907 | 7.4  |
| chr15 | 95387844 | 95388725 | 3.7  |
| chr15 | 95400928 | 95401752 | 3.7  |
| chr15 | 95412661 | 95413870 | 4.04 |

|       |          |          |      |
|-------|----------|----------|------|
| chr15 | 95418726 | 95422386 | 11.1 |
| chr15 | 95422936 | 95424692 | 4.04 |
| chr15 | 95425667 | 95427910 | 3.7  |
| chr15 | 95452250 | 95454152 | 4.37 |
| chr15 | 95477077 | 95478634 | 4.04 |
| chr15 | 95528733 | 95529537 | 3.36 |
| chr15 | 95588528 | 95590289 | 5.38 |
| chr15 | 95591474 | 95593216 | 4.04 |
| chr15 | 95616963 | 95617785 | 3.7  |
| chr15 | 95671736 | 95673013 | 3.7  |
| chr15 | 95675530 | 95676388 | 2.69 |
| chr15 | 95691818 | 95693761 | 4.37 |
| chr15 | 95695939 | 95697478 | 3.36 |
| chr15 | 95709368 | 95710217 | 2.35 |
| chr15 | 95716087 | 95718385 | 4.04 |
| chr15 | 95723235 | 95724582 | 4.37 |
| chr15 | 95730301 | 95731764 | 3.7  |
| chr15 | 95743753 | 95745607 | 4.04 |
| chr15 | 95777768 | 95779383 | 5.05 |
| chr15 | 95789843 | 95791478 | 4.71 |
| chr15 | 95802213 | 95803617 | 5.38 |
| chr15 | 95805151 | 95805952 | 2.69 |
| chr15 | 95815979 | 95817068 | 3.36 |
| chr15 | 95819122 | 95819949 | 2.69 |
| chr15 | 95836004 | 95837479 | 4.04 |
| chr15 | 95843904 | 95845148 | 3.7  |
| chr15 | 95847070 | 95848944 | 3.7  |
| chr15 | 95859014 | 95863095 | 4.71 |
| chr15 | 95904731 | 95906558 | 4.71 |
| chr15 | 95926239 | 95927125 | 2.35 |
| chr15 | 95964282 | 95965112 | 3.36 |
| chr15 | 96029138 | 96030193 | 4.04 |
| chr15 | 96053710 | 96054528 | 2.69 |
| chr15 | 96099779 | 96101150 | 4.37 |
| chr15 | 96101534 | 96103677 | 4.37 |
| chr15 | 96122279 | 96122988 | 2.35 |
| chr15 | 96172106 | 96173291 | 4.71 |
| chr15 | 96195837 | 96196692 | 3.36 |
| chr15 | 96235051 | 96240004 | 14.8 |
| chr15 | 96240550 | 96247805 | 8.75 |
| chr15 | 96254840 | 96256584 | 3.7  |
| chr15 | 96259311 | 96260360 | 4.37 |
| chr15 | 96262113 | 96262883 | 3.36 |



|       |          |          |       |
|-------|----------|----------|-------|
| chr15 | 96275352 | 96276218 | 4.04  |
| chr15 | 96286726 | 96287869 | 3.36  |
| chr15 | 96315981 | 96317249 | 2.69  |
| chr15 | 96325799 | 96330600 | 10.76 |
| chr15 | 96340058 | 96341600 | 3.7   |
| chr15 | 96342523 | 96343869 | 5.38  |
| chr15 | 96351052 | 96351897 | 3.7   |
| chr15 | 96358614 | 96359539 | 3.7   |
| chr15 | 96371986 | 96372654 | 3.7   |
| chr15 | 96381245 | 96382193 | 2.35  |
| chr15 | 96388870 | 96390134 | 4.37  |
| chr15 | 96391298 | 96392385 | 4.71  |
| chr15 | 96393794 | 96394655 | 3.36  |
| chr15 | 96413427 | 96414897 | 3.7   |
| chr15 | 96415673 | 96417156 | 3.7   |
| chr15 | 96418063 | 96419613 | 5.05  |
| chr15 | 96429855 | 96433263 | 5.38  |
| chr15 | 96436768 | 96439905 | 4.71  |
| chr15 | 96444611 | 96445545 | 3.7   |
| chr15 | 96446811 | 96448672 | 3.36  |
| chr15 | 96450980 | 96451838 | 3.03  |
| chr15 | 96454340 | 96456817 | 5.05  |
| chr15 | 96473580 | 96474925 | 2.35  |
| chr15 | 96475541 | 96476463 | 4.37  |
| chr15 | 96478228 | 96478979 | 3.7   |
| chr15 | 96480540 | 96481789 | 4.37  |
| chr15 | 96494269 | 96497170 | 4.04  |
| chr15 | 96498231 | 96500450 | 5.38  |
| chr15 | 96501048 | 96502371 | 5.05  |
| chr15 | 96506595 | 96507536 | 3.36  |
| chr15 | 96510591 | 96511671 | 4.04  |
| chr15 | 96518012 | 96519104 | 3.03  |
| chr15 | 96525109 | 96526283 | 3.03  |
| chr15 | 96530272 | 96531071 | 3.7   |
| chr15 | 96538366 | 96539847 | 3.03  |
| chr15 | 96569466 | 96570601 | 3.7   |
| chr15 | 96583654 | 96584880 | 2.35  |
| chr15 | 96586053 | 96586956 | 3.03  |
| chr15 | 96591937 | 96592989 | 3.7   |
| chr15 | 96595355 | 96597451 | 5.05  |
| chr15 | 96610309 | 96611672 | 5.05  |
| chr15 | 96613181 | 96614568 | 4.37  |
| chr15 | 96617751 | 96618714 | 3.36  |

|       |          |          |      |
|-------|----------|----------|------|
| chr15 | 96636038 | 96637085 | 3.7  |
| chr15 | 96640487 | 96641425 | 3.03 |
| chr15 | 96645444 | 96646414 | 4.04 |
| chr15 | 96650880 | 96651818 | 3.36 |
| chr15 | 96682123 | 96682983 | 3.36 |
| chr15 | 96713796 | 96715036 | 4.04 |
| chr15 | 96739348 | 96740182 | 4.04 |
| chr15 | 96743667 | 96744469 | 4.37 |
| chr15 | 96750653 | 96751541 | 3.7  |
| chr15 | 96773584 | 96774464 | 4.71 |
| chr15 | 96783018 | 96783829 | 3.7  |
| chr15 | 96806899 | 96807762 | 3.03 |
| chr15 | 96829254 | 96830329 | 2.02 |
| chr15 | 96840966 | 96842402 | 4.04 |
| chr15 | 96866886 | 96867848 | 2.69 |
| chr15 | 96868569 | 96870099 | 5.38 |
| chr15 | 96871761 | 96872563 | 4.04 |
| chr15 | 96873713 | 96878381 | 4.37 |
| chr15 | 96879156 | 96880725 | 4.04 |
| chr15 | 96882081 | 96884208 | 5.05 |
| chr15 | 96897337 | 96898664 | 5.05 |
| chr15 | 96899032 | 96900931 | 4.71 |
| chr15 | 96928213 | 96929212 | 4.04 |
| chr15 | 96969090 | 96970213 | 2.02 |
| chr15 | 96991826 | 96993161 | 2.69 |
| chr15 | 97005409 | 97006491 | 4.04 |
| chr15 | 97060720 | 97061631 | 4.37 |
| chr15 | 97109151 | 97110172 | 4.04 |
| chr15 | 97150188 | 97150986 | 2.02 |
| chr15 | 97156330 | 97157132 | 3.36 |
| chr15 | 97174521 | 97176169 | 3.03 |
| chr15 | 97254149 | 97254983 | 1.68 |
| chr15 | 97259233 | 97259976 | 1.68 |
| chr15 | 97287815 | 97288627 | 2.35 |
| chr15 | 97364189 | 97365161 | 1.68 |
| chr15 | 97438360 | 97439384 | 2.35 |
| chr15 | 97535338 | 97536302 | 3.7  |
| chr15 | 97563815 | 97564788 | 3.7  |
| chr15 | 97624022 | 97625126 | 3.03 |
| chr15 | 97634426 | 97635452 | 2.69 |
| chr15 | 97639264 | 97640425 | 2.35 |
| chr15 | 97657482 | 97658343 | 2.02 |
| chr15 | 97725705 | 97726655 | 1.68 |

|       |          |          |      |
|-------|----------|----------|------|
| chr15 | 97790945 | 97792558 | 7.06 |
| chr15 | 97858677 | 97859702 | 2.35 |
| chr15 | 97991871 | 97992856 | 2.69 |
| chr15 | 98038622 | 98039461 | 2.35 |
| chr15 | 98195563 | 98196768 | 2.02 |
| chr15 | 98273404 | 98274461 | 2.35 |
| chr15 | 98286692 | 98287786 | 2.02 |
| chr15 | 98385346 | 98386312 | 2.02 |
| chr15 | 98451547 | 98452541 | 2.35 |
| chr15 | 98476291 | 98477728 | 6.73 |
| chr15 | 98522660 | 98523883 | 2.35 |
| chr15 | 98529459 | 98530779 | 7.74 |
| chr15 | 98599906 | 98601458 | 3.03 |
| chr15 | 98608831 | 98609702 | 2.02 |
| chr15 | 98652029 | 98652770 | 2.69 |
| chr15 | 98688246 | 98689079 | 1.35 |
| chr15 | 98739755 | 98740670 | 2.35 |
| chr15 | 98742224 | 98743385 | 2.02 |
| chr15 | 98787825 | 98788803 | 3.7  |
| chr15 | 98794235 | 98795196 | 3.7  |
| chr15 | 98847620 | 98848879 | 3.03 |
| chr15 | 98873702 | 98874622 | 2.02 |
| chr15 | 98991031 | 98991781 | 3.7  |
| chr15 | 98992865 | 98993907 | 2.69 |
| chr15 | 99019106 | 99020897 | 4.71 |
| chr15 | 99023612 | 99024488 | 2.02 |
| chr15 | 99026860 | 99027659 | 3.36 |
| chr15 | 99088490 | 99089369 | 2.02 |
| chr15 | 99134060 | 99134842 | 3.7  |
| chr15 | 99140938 | 99141781 | 2.69 |
| chr15 | 99178846 | 99180069 | 3.36 |
| chr15 | 99191720 | 99194775 | 5.05 |
| chr15 | 99204100 | 99204991 | 1.68 |
| chr15 | 99210545 | 99211406 | 2.69 |
| chr15 | 99270240 | 99271284 | 3.36 |
| chr15 | 99302125 | 99303047 | 1.68 |
| chr15 | 99315100 | 99316132 | 1.68 |
| chr15 | 99322165 | 99323759 | 4.71 |
| chr15 | 99342568 | 99343611 | 4.37 |
| chr15 | 99371106 | 99377433 | 6.73 |
| chr15 | 99381297 | 99382260 | 4.37 |
| chr15 | 99386179 | 99387321 | 3.7  |
| chr15 | 99408620 | 99412429 | 4.37 |

|       |           |           |      |
|-------|-----------|-----------|------|
| chr15 | 99440380  | 99441785  | 3.36 |
| chr15 | 99442559  | 99443488  | 3.7  |
| chr15 | 99457847  | 99459263  | 4.04 |
| chr15 | 99503590  | 99506492  | 6.05 |
| chr15 | 99557913  | 99558880  | 3.36 |
| chr15 | 99592190  | 99593227  | 2.02 |
| chr15 | 99602202  | 99603144  | 3.03 |
| chr15 | 99609562  | 99610569  | 2.02 |
| chr15 | 99626011  | 99627552  | 2.35 |
| chr15 | 99644820  | 99646105  | 4.37 |
| chr15 | 99646780  | 99647510  | 1.68 |
| chr15 | 99735155  | 99736309  | 1.68 |
| chr15 | 99748940  | 99749771  | 2.69 |
| chr15 | 99788131  | 99789174  | 2.02 |
| chr15 | 99852450  | 99853356  | 3.36 |
| chr15 | 99895570  | 99896368  | 2.69 |
| chr15 | 99930169  | 99930962  | 1.68 |
| chr15 | 99985874  | 99986823  | 2.35 |
| chr15 | 100003868 | 100005249 | 6.05 |
| chr15 | 100106338 | 100107889 | 4.37 |
| chr15 | 100122033 | 100123219 | 1.68 |
| chr15 | 100125861 | 100127104 | 2.69 |
| chr15 | 100172454 | 100173500 | 3.03 |
| chr15 | 100175773 | 100176851 | 5.05 |
| chr15 | 100226280 | 100227083 | 3.36 |
| chr15 | 100272279 | 100273945 | 3.36 |
| chr15 | 100317997 | 100318950 | 2.02 |
| chr15 | 100442593 | 100443450 | 1.68 |
| chr15 | 100480709 | 100482648 | 5.38 |
| chr15 | 100522301 | 100523254 | 2.02 |
| chr15 | 100583607 | 100584890 | 4.37 |
| chr15 | 100642895 | 100643782 | 2.35 |
| chr15 | 100657353 | 100658180 | 1.68 |
| chr15 | 100659318 | 100663205 | 7.4  |
| chr15 | 100687964 | 100689437 | 5.38 |
| chr15 | 100712282 | 100715724 | 8.07 |
| chr15 | 100787064 | 100788110 | 4.71 |
| chr15 | 100813173 | 100814159 | 3.03 |
| chr15 | 100830882 | 100831829 | 4.04 |
| chr15 | 100871719 | 100872652 | 1.68 |
| chr15 | 100881683 | 100882524 | 2.69 |
| chr15 | 100944239 | 100945159 | 3.7  |
| chr15 | 100993266 | 100994108 | 2.69 |

|       |           |           |       |
|-------|-----------|-----------|-------|
| chr15 | 101003395 | 101005248 | 4.04  |
| chr15 | 101013329 | 101014611 | 4.71  |
| chr15 | 101017114 | 101019504 | 4.04  |
| chr15 | 101067998 | 101068864 | 3.7   |
| chr15 | 101078181 | 101079550 | 5.05  |
| chr15 | 101100797 | 101101976 | 4.37  |
| chr15 | 101124356 | 101131309 | 18.16 |
| chr15 | 101174997 | 101176259 | 3.7   |
| chr15 | 101181730 | 101182796 | 2.69  |
| chr15 | 101233467 | 101234360 | 4.04  |
| chr15 | 101255792 | 101256810 | 3.03  |
| chr15 | 101261415 | 101262811 | 4.37  |
| chr15 | 101265185 | 101266010 | 4.37  |
| chr15 | 101328117 | 101328995 | 1.68  |
| chr15 | 101344041 | 101345011 | 4.04  |
| chr15 | 101347215 | 101350472 | 6.39  |
| chr15 | 101354841 | 101356408 | 3.03  |
| chr15 | 101372813 | 101373647 | 2.69  |
| chr15 | 101384917 | 101385720 | 1.68  |
| chr15 | 101388975 | 101390139 | 2.69  |
| chr15 | 101413413 | 101414326 | 3.7   |
| chr15 | 101431330 | 101432413 | 2.35  |
| chr15 | 101440511 | 101441491 | 3.7   |
| chr15 | 101470825 | 101472293 | 2.69  |
| chr15 | 101516791 | 101518352 | 3.03  |
| chr15 | 101528787 | 101529743 | 2.35  |
| chr15 | 101548208 | 101549529 | 4.04  |
| chr15 | 101564891 | 101566807 | 2.35  |
| chr15 | 101629597 | 101630780 | 2.35  |
| chr15 | 101631611 | 101632774 | 2.35  |
| chr15 | 101633149 | 101634461 | 2.02  |
| chr15 | 101660603 | 101661438 | 2.02  |
| chr15 | 101662735 | 101663463 | 2.35  |
| chr15 | 101678434 | 101679354 | 1.68  |
| chr15 | 101690508 | 101691605 | 4.04  |
| chr15 | 101703987 | 101705112 | 6.05  |
| chr15 | 101705686 | 101706689 | 3.36  |
| chr15 | 101764210 | 101765343 | 4.71  |
| chr15 | 101767617 | 101769293 | 3.36  |
| chr15 | 101787871 | 101789229 | 4.37  |
| chr15 | 101791566 | 101793910 | 3.7   |
| chr15 | 101816415 | 101817541 | 2.02  |
| chr15 | 101828937 | 101829684 | 3.36  |

|       |           |           |      |
|-------|-----------|-----------|------|
| chr15 | 101834555 | 101836057 | 4.37 |
| chr15 | 101855257 | 101856423 | 2.02 |
| chr15 | 101874961 | 101876045 | 2.02 |
| chr15 | 101896809 | 101897750 | 2.02 |
| chr15 | 101919994 | 101920801 | 1.35 |
| chr15 | 102028626 | 102030772 | 3.7  |
| chr15 | 102031612 | 102033310 | 3.03 |
| chr15 | 102038493 | 102039792 | 2.69 |
| chr15 | 102041336 | 102042815 | 2.35 |
| chr15 | 102043912 | 102044701 | 2.35 |
| chr15 | 102053459 | 102054413 | 2.35 |
| chr15 | 102057283 | 102059326 | 3.03 |
| chr15 | 102062507 | 102064659 | 2.35 |
| chr15 | 102067451 | 102068696 | 2.69 |
| chr15 | 102079358 | 102083103 | 3.03 |
| chr15 | 102083635 | 102084620 | 2.35 |
| chr15 | 102085417 | 102087433 | 3.03 |
| chr15 | 102091753 | 102092851 | 2.02 |
| chr15 | 102093731 | 102095222 | 2.35 |
| chr15 | 102098130 | 102099952 | 2.69 |
| chr15 | 102105674 | 102107658 | 2.02 |
| chr15 | 102112721 | 102114068 | 2.02 |
| chr15 | 102119189 | 102120500 | 2.35 |
| chr15 | 102121322 | 102122132 | 2.35 |
| chr15 | 102123989 | 102124789 | 2.02 |
| chr15 | 102126095 | 102127233 | 2.02 |
| chr15 | 102136344 | 102140977 | 3.7  |
| chr15 | 102148040 | 102150478 | 3.36 |
| chr15 | 102153594 | 102155445 | 4.04 |
| chr15 | 102157194 | 102158080 | 2.02 |
| chr15 | 102162117 | 102163592 | 2.02 |
| chr15 | 102176733 | 102177822 | 4.04 |
| chr15 | 102186860 | 102187940 | 2.35 |
| chr15 | 102188697 | 102189513 | 2.35 |
| chr15 | 102189983 | 102190985 | 1.35 |
| chr15 | 102191657 | 102193537 | 5.38 |
| chr15 | 102210895 | 102211708 | 1.68 |
| chr15 | 102220344 | 102221202 | 3.36 |
| chr15 | 102224674 | 102225540 | 2.02 |
| chr15 | 102227774 | 102229294 | 2.69 |
| chr15 | 102237498 | 102238436 | 2.02 |
| chr15 | 102263738 | 102266736 | 3.03 |
| chr15 | 102271377 | 102272430 | 2.35 |

|       |           |           |       |
|-------|-----------|-----------|-------|
| chr15 | 102356396 | 102358029 | 2.35  |
| chr15 | 102377375 | 102378327 | 2.69  |
| chr15 | 102388967 | 102389975 | 2.02  |
| chr15 | 102402720 | 102403613 | 3.7   |
| chr14 | 19000012  | 19003845  | 5.72  |
| chr14 | 19008836  | 19010530  | 3.36  |
| chr14 | 19011301  | 19014289  | 4.71  |
| chr14 | 19018269  | 19019136  | 3.36  |
| chr14 | 19022576  | 19023726  | 5.38  |
| chr14 | 19034871  | 19037577  | 6.39  |
| chr14 | 19038374  | 19041275  | 5.05  |
| chr14 | 19041932  | 19043269  | 4.04  |
| chr14 | 19044015  | 19045332  | 5.38  |
| chr14 | 19432915  | 19434394  | 2.35  |
| chr14 | 19436767  | 19437985  | 1.68  |
| chr14 | 20586502  | 20587497  | 6.73  |
| chr14 | 20938207  | 20939237  | 3.7   |
| chr14 | 21036754  | 21037809  | 2.69  |
| chr14 | 21149041  | 21149944  | 3.36  |
| chr14 | 21150972  | 21152320  | 4.37  |
| chr14 | 21220278  | 21221436  | 4.37  |
| chr14 | 21316690  | 21317653  | 3.36  |
| chr14 | 21571541  | 21572949  | 3.7   |
| chr14 | 21593067  | 21594144  | 6.05  |
| chr14 | 21851876  | 21852700  | 3.03  |
| chr14 | 21923849  | 21924766  | 3.7   |
| chr14 | 22794758  | 22795956  | 3.7   |
| chr14 | 22811844  | 22814042  | 4.04  |
| chr14 | 23305756  | 23306642  | 1.35  |
| chr14 | 23339994  | 23341488  | 4.71  |
| chr14 | 23503355  | 23504095  | 4.04  |
| chr14 | 23770522  | 23771329  | 3.36  |
| chr14 | 23807891  | 23809830  | 7.74  |
| chr14 | 24092507  | 24095366  | 12.45 |
| chr14 | 24163203  | 24164551  | 5.05  |
| chr14 | 24171938  | 24175379  | 12.45 |
| chr14 | 24175681  | 24177891  | 3.7   |
| chr14 | 24178163  | 24179332  | 4.37  |
| chr14 | 24266104  | 24267342  | 4.04  |
| chr14 | 24299130  | 24300127  | 4.37  |
| chr14 | 24317843  | 24320745  | 4.37  |
| chr14 | 24582414  | 24584373  | 5.38  |
| chr14 | 24657642  | 24658759  | 5.05  |

|       |          |          |       |
|-------|----------|----------|-------|
| chr14 | 24739724 | 24741399 | 5.05  |
| chr14 | 24835330 | 24837189 | 5.38  |
| chr14 | 26115507 | 26116392 | 4.04  |
| chr14 | 26116880 | 26118016 | 4.04  |
| chr14 | 26118739 | 26119599 | 4.04  |
| chr14 | 27778271 | 27779565 | 4.71  |
| chr14 | 27973434 | 27974941 | 5.38  |
| chr14 | 28092434 | 28094037 | 7.4   |
| chr14 | 28177617 | 28178438 | 3.03  |
| chr14 | 28184361 | 28187210 | 7.74  |
| chr14 | 28830599 | 28831558 | 3.36  |
| chr14 | 30114464 | 30119247 | 11.44 |
| chr14 | 30308027 | 30310082 | 7.4   |
| chr14 | 30814152 | 30815461 | 5.38  |
| chr14 | 31294717 | 31296126 | 4.71  |
| chr14 | 31303084 | 31304441 | 7.06  |
| chr14 | 31434924 | 31436387 | 5.72  |
| chr14 | 31675882 | 31677760 | 4.04  |
| chr14 | 31738996 | 31740395 | 3.36  |
| chr14 | 31741306 | 31742525 | 4.37  |
| chr14 | 31744047 | 31749028 | 12.45 |
| chr14 | 31750158 | 31751587 | 3.7   |
| chr14 | 31889321 | 31890617 | 4.71  |
| chr14 | 32121097 | 32123311 | 8.07  |
| chr14 | 32218190 | 32219077 | 3.36  |
| chr14 | 32249554 | 32252976 | 11.44 |
| chr14 | 32439792 | 32440733 | 3.36  |
| chr14 | 32442866 | 32444946 | 5.72  |
| chr14 | 32451450 | 32452706 | 4.37  |
| chr14 | 32545393 | 32546133 | 3.7   |
| chr14 | 32606137 | 32607112 | 3.36  |
| chr14 | 32666794 | 32667703 | 4.71  |
| chr14 | 32723788 | 32724640 | 2.35  |
| chr14 | 32728447 | 32729267 | 4.04  |
| chr14 | 32732637 | 32734125 | 4.04  |
| chr14 | 33272617 | 33274432 | 4.71  |
| chr14 | 33454233 | 33455090 | 2.35  |
| chr14 | 33882115 | 33883131 | 4.04  |
| chr14 | 34249865 | 34251842 | 5.05  |
| chr14 | 34317914 | 34319108 | 3.36  |
| chr14 | 34344805 | 34346403 | 5.05  |
| chr14 | 34351016 | 34352055 | 3.36  |
| chr14 | 34438718 | 34439968 | 4.04  |



|       |          |          |      |
|-------|----------|----------|------|
| chr14 | 34509393 | 34510263 | 3.7  |
| chr14 | 34606969 | 34608337 | 4.37 |
| chr14 | 34672143 | 34673379 | 3.7  |
| chr14 | 34800850 | 34802131 | 3.7  |
| chr14 | 34837273 | 34838604 | 4.37 |
| chr14 | 34860014 | 34860925 | 4.04 |
| chr14 | 34888985 | 34890672 | 5.38 |
| chr14 | 34892083 | 34893159 | 4.37 |
| chr14 | 34907619 | 34908465 | 3.36 |
| chr14 | 35343162 | 35345129 | 3.7  |
| chr14 | 35503159 | 35504606 | 7.4  |
| chr14 | 35590716 | 35591993 | 4.37 |
| chr14 | 35805564 | 35806868 | 4.37 |
| chr14 | 35839293 | 35841085 | 6.05 |
| chr14 | 35843270 | 35844317 | 4.04 |
| chr14 | 35855918 | 35856970 | 3.36 |
| chr14 | 35872380 | 35874828 | 6.05 |
| chr14 | 35927513 | 35928447 | 3.36 |
| chr14 | 36365375 | 36366198 | 3.7  |
| chr14 | 37250936 | 37251841 | 3.03 |
| chr14 | 37324889 | 37326092 | 4.71 |
| chr14 | 37327010 | 37327972 | 4.04 |
| chr14 | 37640681 | 37641925 | 4.71 |
| chr14 | 37674857 | 37676207 | 7.74 |
| chr14 | 38015943 | 38016871 | 4.04 |
| chr14 | 38033120 | 38039179 | 7.4  |
| chr14 | 38042539 | 38043517 | 3.7  |
| chr14 | 38044038 | 38045979 | 4.37 |
| chr14 | 38047962 | 38050891 | 4.04 |
| chr14 | 38051329 | 38058889 | 6.05 |
| chr14 | 38059477 | 38067383 | 8.07 |
| chr14 | 38068179 | 38069780 | 4.71 |
| chr14 | 38070026 | 38071354 | 7.74 |
| chr14 | 38083179 | 38085940 | 5.38 |
| chr14 | 38119315 | 38120623 | 3.36 |
| chr14 | 38162308 | 38163512 | 4.71 |
| chr14 | 38244251 | 38245292 | 3.7  |
| chr14 | 38303090 | 38304551 | 5.05 |
| chr14 | 38480409 | 38482372 | 7.06 |
| chr14 | 38562588 | 38563941 | 5.72 |
| chr14 | 38915330 | 38916499 | 4.04 |
| chr14 | 38946347 | 38947615 | 4.04 |
| chr14 | 39028389 | 39029918 | 5.38 |

|       |          |          |       |
|-------|----------|----------|-------|
| chr14 | 39131869 | 39132564 | 4.37  |
| chr14 | 39523719 | 39527481 | 22.2  |
| chr14 | 39610342 | 39611704 | 5.05  |
| chr14 | 39670808 | 39671612 | 4.37  |
| chr14 | 39884747 | 39886791 | 5.72  |
| chr14 | 39901800 | 39902676 | 3.7   |
| chr14 | 39909765 | 39911646 | 3.7   |
| chr14 | 40027457 | 40028640 | 4.04  |
| chr14 | 40453187 | 40454229 | 4.37  |
| chr14 | 40473876 | 40474992 | 3.7   |
| chr14 | 40618059 | 40618960 | 3.03  |
| chr14 | 40690335 | 40691574 | 4.71  |
| chr14 | 40699803 | 40700812 | 3.7   |
| chr14 | 40708730 | 40709569 | 3.7   |
| chr14 | 40837489 | 40838384 | 3.03  |
| chr14 | 40862055 | 40863357 | 4.04  |
| chr14 | 40876803 | 40878332 | 8.75  |
| chr14 | 40935035 | 40940565 | 7.74  |
| chr14 | 40942882 | 40946003 | 9.08  |
| chr14 | 41174787 | 41176125 | 5.72  |
| chr14 | 41186025 | 41187107 | 3.7   |
| chr14 | 41205866 | 41207589 | 6.39  |
| chr14 | 41208101 | 41208913 | 3.36  |
| chr14 | 41735738 | 41737235 | 5.38  |
| chr14 | 41926359 | 41927834 | 3.36  |
| chr14 | 42145572 | 42146393 | 3.7   |
| chr14 | 42260947 | 42262293 | 6.73  |
| chr14 | 42579897 | 42581818 | 3.7   |
| chr14 | 42711557 | 42713889 | 7.4   |
| chr14 | 42775747 | 42777516 | 8.41  |
| chr14 | 43042116 | 43042947 | 3.03  |
| chr14 | 43254925 | 43256581 | 4.04  |
| chr14 | 43395965 | 43397462 | 5.38  |
| chr14 | 43470057 | 43474652 | 8.75  |
| chr14 | 43475185 | 43479252 | 6.73  |
| chr14 | 43500301 | 43501185 | 4.04  |
| chr14 | 43542011 | 43543467 | 4.71  |
| chr14 | 43587912 | 43590046 | 10.09 |
| chr14 | 43837423 | 43838609 | 5.05  |
| chr14 | 43918014 | 43919665 | 4.37  |
| chr14 | 43987546 | 43989042 | 4.37  |
| chr14 | 44050085 | 44053138 | 14.13 |
| chr14 | 44085420 | 44087065 | 4.04  |

|       |          |          |      |
|-------|----------|----------|------|
| chr14 | 44112587 | 44113775 | 3.7  |
| chr14 | 44119186 | 44121676 | 4.37 |
| chr14 | 44122904 | 44123992 | 4.04 |
| chr14 | 44136464 | 44138205 | 3.36 |
| chr14 | 44193787 | 44194816 | 3.7  |
| chr14 | 44242899 | 44244818 | 5.38 |
| chr14 | 44255052 | 44256228 | 3.36 |
| chr14 | 44271565 | 44272631 | 3.36 |
| chr14 | 44274410 | 44275466 | 3.36 |
| chr14 | 44278992 | 44279820 | 3.36 |
| chr14 | 44507328 | 44508663 | 4.37 |
| chr14 | 44529619 | 44530519 | 3.36 |
| chr14 | 44578012 | 44579607 | 5.72 |
| chr14 | 44699442 | 44700880 | 3.36 |
| chr14 | 44710824 | 44711678 | 3.36 |
| chr14 | 44711912 | 44712827 | 3.36 |
| chr14 | 45149626 | 45151186 | 3.36 |
| chr14 | 45202065 | 45202938 | 3.7  |
| chr14 | 45507463 | 45508925 | 4.37 |
| chr14 | 45581659 | 45583088 | 3.7  |
| chr14 | 45603255 | 45604198 | 4.04 |
| chr14 | 45721853 | 45723405 | 5.05 |
| chr14 | 45726961 | 45727972 | 3.7  |
| chr14 | 45750455 | 45752709 | 6.39 |
| chr14 | 45834219 | 45835000 | 2.69 |
| chr14 | 46575918 | 46577041 | 5.38 |
| chr14 | 47025470 | 47026772 | 3.36 |
| chr14 | 47251015 | 47252363 | 4.04 |
| chr14 | 49203291 | 49204184 | 4.37 |
| chr14 | 49274099 | 49275356 | 4.04 |
| chr14 | 49916246 | 49917539 | 5.05 |
| chr14 | 49945382 | 49946885 | 6.05 |
| chr14 | 50064882 | 50066468 | 3.36 |
| chr14 | 50087089 | 50088075 | 4.04 |
| chr14 | 50100027 | 50101704 | 4.04 |
| chr14 | 50143430 | 50144271 | 3.36 |
| chr14 | 50216878 | 50217664 | 1.01 |
| chr14 | 50233896 | 50235149 | 4.04 |
| chr14 | 50319460 | 50320326 | 3.7  |
| chr14 | 50328316 | 50329476 | 3.7  |
| chr14 | 50358705 | 50359928 | 4.37 |
| chr14 | 50401017 | 50401787 | 4.71 |
| chr14 | 50467122 | 50470696 | 5.72 |

|       |          |          |       |
|-------|----------|----------|-------|
| chr14 | 50486722 | 50488192 | 3.7   |
| chr14 | 50699718 | 50700544 | 3.7   |
| chr14 | 50777874 | 50780500 | 4.04  |
| chr14 | 50798319 | 50799145 | 3.7   |
| chr14 | 50935313 | 50936635 | 4.71  |
| chr14 | 50937506 | 50940353 | 6.73  |
| chr14 | 51157929 | 51159659 | 4.71  |
| chr14 | 51437120 | 51438111 | 1.68  |
| chr14 | 52000851 | 52002259 | 8.41  |
| chr14 | 52455706 | 52456790 | 3.7   |
| chr14 | 52714831 | 52715688 | 3.7   |
| chr14 | 52726757 | 52727577 | 3.7   |
| chr14 | 52788190 | 52789307 | 4.04  |
| chr14 | 52839779 | 52841432 | 4.37  |
| chr14 | 52864179 | 52865260 | 3.36  |
| chr14 | 52927751 | 52929387 | 9.75  |
| chr14 | 53161696 | 53162565 | 4.04  |
| chr14 | 53172769 | 53174052 | 4.04  |
| chr14 | 53257569 | 53258908 | 3.36  |
| chr14 | 53603955 | 53605250 | 6.05  |
| chr14 | 53605494 | 53608839 | 3.7   |
| chr14 | 53611653 | 53612501 | 3.36  |
| chr14 | 53618001 | 53619709 | 5.05  |
| chr14 | 53665105 | 53666357 | 4.37  |
| chr14 | 53691125 | 53692698 | 3.7   |
| chr14 | 53709146 | 53711195 | 3.7   |
| chr14 | 53722006 | 53724687 | 5.38  |
| chr14 | 53739940 | 53741389 | 5.38  |
| chr14 | 53861017 | 53862750 | 5.05  |
| chr14 | 54560928 | 54562277 | 6.39  |
| chr14 | 54707868 | 54709150 | 4.37  |
| chr14 | 54955116 | 54956420 | 6.05  |
| chr14 | 55038753 | 55039855 | 4.71  |
| chr14 | 55239528 | 55240798 | 5.05  |
| chr14 | 55289678 | 55292432 | 4.71  |
| chr14 | 55368322 | 55369521 | 3.7   |
| chr14 | 55517659 | 55519297 | 4.37  |
| chr14 | 55569692 | 55570758 | 4.37  |
| chr14 | 55588375 | 55589854 | 5.05  |
| chr14 | 55737652 | 55738691 | 4.37  |
| chr14 | 55778374 | 55782389 | 11.77 |
| chr14 | 55878116 | 55878939 | 3.36  |
| chr14 | 55934560 | 55936054 | 5.72  |

|       |          |          |      |
|-------|----------|----------|------|
| chr14 | 56002751 | 56003833 | 3.7  |
| chr14 | 56007761 | 56008831 | 3.36 |
| chr14 | 56023740 | 56024611 | 4.37 |
| chr14 | 56065850 | 56066918 | 3.36 |
| chr14 | 56256133 | 56257003 | 3.7  |
| chr14 | 57096822 | 57098047 | 4.71 |
| chr14 | 57221771 | 57222776 | 4.04 |
| chr14 | 57459527 | 57460379 | 3.36 |
| chr14 | 57734858 | 57736207 | 5.05 |
| chr14 | 57856661 | 57857915 | 4.04 |
| chr14 | 58529141 | 58530085 | 1.35 |
| chr14 | 58551036 | 58551902 | 3.36 |
| chr14 | 58765103 | 58766675 | 4.04 |
| chr14 | 58862232 | 58863316 | 4.71 |
| chr14 | 59104567 | 59105533 | 3.03 |
| chr14 | 59306681 | 59307533 | 1.01 |
| chr14 | 59655398 | 59656846 | 3.36 |
| chr14 | 59827673 | 59828792 | 4.37 |
| chr14 | 59994059 | 59994902 | 3.36 |
| chr14 | 60083203 | 60084503 | 4.71 |
| chr14 | 60558157 | 60559017 | 3.7  |
| chr14 | 60631010 | 60632591 | 4.37 |
| chr14 | 60837822 | 60839204 | 5.05 |
| chr14 | 61113600 | 61115728 | 5.05 |
| chr14 | 61123329 | 61124987 | 4.04 |
| chr14 | 61328578 | 61329585 | 4.04 |
| chr14 | 61423812 | 61425827 | 14.8 |
| chr14 | 61580406 | 61582548 | 3.36 |
| chr14 | 61610347 | 61611630 | 3.7  |
| chr14 | 61640905 | 61642038 | 3.7  |
| chr14 | 61746688 | 61748790 | 4.71 |
| chr14 | 61787291 | 61788757 | 4.37 |
| chr14 | 61822388 | 61823421 | 3.7  |
| chr14 | 61840480 | 61842293 | 8.41 |
| chr14 | 61905273 | 61906508 | 4.04 |
| chr14 | 61929179 | 61930375 | 4.04 |
| chr14 | 61951458 | 61952635 | 5.38 |
| chr14 | 61954893 | 61955820 | 4.04 |
| chr14 | 61981237 | 61982792 | 5.05 |
| chr14 | 61991779 | 61994489 | 4.71 |
| chr14 | 61997398 | 61998240 | 3.7  |
| chr14 | 62006117 | 62007151 | 3.7  |
| chr14 | 62019273 | 62020816 | 4.37 |

|       |          |          |       |
|-------|----------|----------|-------|
| chr14 | 62025707 | 62028487 | 5.05  |
| chr14 | 62029252 | 62030664 | 3.7   |
| chr14 | 62058686 | 62059511 | 4.37  |
| chr14 | 62129021 | 62129980 | 5.05  |
| chr14 | 62162407 | 62163317 | 3.03  |
| chr14 | 62164806 | 62165721 | 3.36  |
| chr14 | 62217261 | 62218512 | 4.37  |
| chr14 | 62312639 | 62315348 | 4.71  |
| chr14 | 62442461 | 62443753 | 4.04  |
| chr14 | 62580801 | 62581686 | 2.35  |
| chr14 | 62819792 | 62820563 | 2.02  |
| chr14 | 62963896 | 62965098 | 5.38  |
| chr14 | 64107776 | 64109076 | 5.72  |
| chr14 | 64130293 | 64131864 | 3.7   |
| chr14 | 64183286 | 64185780 | 14.8  |
| chr14 | 64194263 | 64195282 | 3.7   |
| chr14 | 64307757 | 64308884 | 3.7   |
| chr14 | 64319057 | 64320515 | 3.36  |
| chr14 | 64804216 | 64806070 | 4.71  |
| chr14 | 64807328 | 64808420 | 6.05  |
| chr14 | 64967807 | 64972318 | 5.38  |
| chr14 | 64981536 | 64982327 | 4.37  |
| chr14 | 65005872 | 65008226 | 4.04  |
| chr14 | 65050878 | 65051700 | 2.69  |
| chr14 | 65226400 | 65227383 | 4.04  |
| chr14 | 65426985 | 65428263 | 4.37  |
| chr14 | 65453196 | 65453979 | 3.7   |
| chr14 | 65536683 | 65537869 | 4.04  |
| chr14 | 65688972 | 65689920 | 4.37  |
| chr14 | 65693194 | 65694414 | 5.05  |
| chr14 | 65694941 | 65696296 | 4.04  |
| chr14 | 65721580 | 65723155 | 4.37  |
| chr14 | 65804677 | 65805706 | 3.36  |
| chr14 | 65819313 | 65820265 | 3.7   |
| chr14 | 65861349 | 65862749 | 4.37  |
| chr14 | 65918190 | 65919144 | 4.71  |
| chr14 | 66002042 | 66003077 | 4.04  |
| chr14 | 66273520 | 66277363 | 8.07  |
| chr14 | 66282706 | 66283999 | 3.36  |
| chr14 | 66466239 | 66467252 | 3.7   |
| chr14 | 66469711 | 66470773 | 4.71  |
| chr14 | 66682615 | 66686503 | 10.76 |
| chr14 | 66783833 | 66785311 | 3.7   |

|       |          |          |       |
|-------|----------|----------|-------|
| chr14 | 66815779 | 66817041 | 3.7   |
| chr14 | 66904276 | 66905460 | 3.36  |
| chr14 | 66905996 | 66907208 | 4.37  |
| chr14 | 66934901 | 66938704 | 9.08  |
| chr14 | 67061428 | 67063437 | 4.71  |
| chr14 | 67123554 | 67126239 | 4.04  |
| chr14 | 67282161 | 67283219 | 4.04  |
| chr14 | 67398534 | 67399810 | 4.37  |
| chr14 | 67409024 | 67413228 | 12.45 |
| chr14 | 67413664 | 67414482 | 4.04  |
| chr14 | 67425688 | 67427846 | 5.72  |
| chr14 | 67572083 | 67573442 | 3.7   |
| chr14 | 67639898 | 67641095 | 4.04  |
| chr14 | 67653473 | 67654536 | 4.04  |
| chr14 | 67683565 | 67684760 | 4.37  |
| chr14 | 67707178 | 67709393 | 4.04  |
| chr14 | 67744790 | 67745738 | 3.03  |
| chr14 | 67778152 | 67779458 | 5.05  |
| chr14 | 67908929 | 67909784 | 3.03  |
| chr14 | 67959464 | 67961191 | 9.42  |
| chr14 | 68174286 | 68175445 | 4.37  |
| chr14 | 68175982 | 68177804 | 9.75  |
| chr14 | 68200245 | 68201051 | 1.68  |
| chr14 | 68367123 | 68368045 | 5.05  |
| chr14 | 68493982 | 68495553 | 3.36  |
| chr14 | 68535347 | 68536450 | 4.71  |
| chr14 | 68539702 | 68541301 | 3.7   |
| chr14 | 68567777 | 68569900 | 9.08  |
| chr14 | 68613405 | 68614197 | 3.36  |
| chr14 | 68615839 | 68616732 | 3.36  |
| chr14 | 68618667 | 68619446 | 5.05  |
| chr14 | 68677117 | 68678377 | 4.04  |
| chr14 | 68772935 | 68773983 | 4.04  |
| chr14 | 68925467 | 68926402 | 3.7   |
| chr14 | 68935404 | 68937007 | 4.71  |
| chr14 | 68996923 | 68998134 | 4.71  |
| chr14 | 69082181 | 69085591 | 14.8  |
| chr14 | 69135495 | 69136424 | 4.37  |
| chr14 | 69180416 | 69181267 | 3.7   |
| chr14 | 69223875 | 69224900 | 2.02  |
| chr14 | 69241385 | 69242670 | 3.36  |
| chr14 | 69259779 | 69261340 | 3.36  |
| chr14 | 69261929 | 69263281 | 3.7   |

|       |          |          |       |
|-------|----------|----------|-------|
| chr14 | 69282886 | 69283710 | 3.03  |
| chr14 | 69302097 | 69303515 | 4.71  |
| chr14 | 69320152 | 69321310 | 4.37  |
| chr14 | 69331710 | 69333177 | 13.12 |
| chr14 | 69392349 | 69393729 | 3.7   |
| chr14 | 69444434 | 69445410 | 3.36  |
| chr14 | 69455209 | 69456411 | 2.02  |
| chr14 | 69618068 | 69619004 | 4.04  |
| chr14 | 69619462 | 69620904 | 3.36  |
| chr14 | 69627747 | 69629060 | 4.37  |
| chr14 | 69649724 | 69650673 | 2.69  |
| chr14 | 69658078 | 69658939 | 3.7   |
| chr14 | 69788167 | 69789328 | 1.35  |
| chr14 | 69823516 | 69824619 | 4.04  |
| chr14 | 69864700 | 69865965 | 5.38  |
| chr14 | 70107090 | 70108483 | 5.72  |
| chr14 | 70109642 | 70110956 | 5.05  |
| chr14 | 70209364 | 70211093 | 7.74  |
| chr14 | 70343163 | 70343975 | 4.37  |
| chr14 | 70465434 | 70466509 | 3.36  |
| chr14 | 70479603 | 70480447 | 2.69  |
| chr14 | 70769959 | 70771378 | 5.05  |
| chr14 | 70799402 | 70801116 | 5.72  |
| chr14 | 70825863 | 70826762 | 4.71  |
| chr14 | 70860887 | 70862208 | 3.36  |
| chr14 | 70864089 | 70865403 | 4.71  |
| chr14 | 70882922 | 70883954 | 3.36  |
| chr14 | 70891889 | 70892822 | 3.03  |
| chr14 | 70900244 | 70905794 | 6.39  |
| chr14 | 70907143 | 70908559 | 4.04  |
| chr14 | 70908866 | 70912411 | 10.76 |
| chr14 | 70956261 | 70957080 | 3.03  |
| chr14 | 70957568 | 70959222 | 5.38  |
| chr14 | 70964196 | 70965831 | 7.06  |
| chr14 | 70986486 | 70987998 | 4.71  |
| chr14 | 71131561 | 71132838 | 4.71  |
| chr14 | 71228669 | 71229439 | 4.37  |
| chr14 | 71303616 | 71304419 | 3.36  |
| chr14 | 71331168 | 71332353 | 3.7   |
| chr14 | 71333293 | 71334879 | 6.05  |
| chr14 | 71410021 | 71411819 | 5.05  |
| chr14 | 71412058 | 71415404 | 9.42  |
| chr14 | 71438664 | 71439801 | 5.05  |



|       |          |          |      |
|-------|----------|----------|------|
| chr14 | 71544813 | 71545851 | 4.71 |
| chr14 | 71616767 | 71618545 | 4.04 |
| chr14 | 71725039 | 71726549 | 6.05 |
| chr14 | 71735333 | 71737041 | 3.7  |
| chr14 | 71770815 | 71772754 | 5.38 |
| chr14 | 71786654 | 71788088 | 4.37 |
| chr14 | 72214012 | 72216560 | 5.72 |
| chr14 | 72269901 | 72271106 | 5.72 |
| chr14 | 72297481 | 72298560 | 3.7  |
| chr14 | 72317449 | 72318643 | 4.71 |
| chr14 | 72323019 | 72323939 | 3.36 |
| chr14 | 72325092 | 72326417 | 4.37 |
| chr14 | 72328612 | 72330260 | 4.04 |
| chr14 | 72331091 | 72332518 | 4.71 |
| chr14 | 72686874 | 72687741 | 3.03 |
| chr14 | 72722245 | 72723413 | 4.37 |
| chr14 | 72749785 | 72753287 | 6.39 |
| chr14 | 72771835 | 72773331 | 4.04 |
| chr14 | 72823980 | 72825240 | 4.04 |
| chr14 | 72870471 | 72871738 | 4.04 |
| chr14 | 72956874 | 72957798 | 3.36 |
| chr14 | 73225806 | 73227295 | 7.74 |
| chr14 | 73234438 | 73235589 | 3.03 |
| chr14 | 73242294 | 73243811 | 3.7  |
| chr14 | 73524440 | 73526491 | 5.38 |
| chr14 | 73674757 | 73676034 | 4.37 |
| chr14 | 73677593 | 73678379 | 2.02 |
| chr14 | 73859493 | 73860354 | 3.7  |
| chr14 | 73992732 | 73994191 | 5.38 |
| chr14 | 74028152 | 74030248 | 6.39 |
| chr14 | 74072878 | 74074453 | 4.37 |
| chr14 | 74079252 | 74080217 | 3.03 |
| chr14 | 74207102 | 74208558 | 4.71 |
| chr14 | 74222919 | 74224006 | 3.7  |
| chr14 | 74224283 | 74227458 | 4.71 |
| chr14 | 74251122 | 74254180 | 4.71 |
| chr14 | 74920504 | 74921667 | 5.05 |
| chr14 | 75078919 | 75079768 | 4.04 |
| chr14 | 75109404 | 75110394 | 3.36 |
| chr14 | 75168559 | 75169986 | 8.75 |
| chr14 | 75260027 | 75261238 | 4.71 |
| chr14 | 75348049 | 75349256 | 4.04 |
| chr14 | 75412057 | 75413300 | 3.7  |

|       |          |          |      |
|-------|----------|----------|------|
| chr14 | 75549329 | 75550395 | 2.35 |
| chr14 | 75554628 | 75555850 | 4.37 |
| chr14 | 75642920 | 75644170 | 4.71 |
| chr14 | 75725095 | 75725877 | 3.7  |
| chr14 | 75831710 | 75832495 | 3.36 |
| chr14 | 75976904 | 75978432 | 4.04 |
| chr14 | 76057235 | 76060891 | 8.75 |
| chr14 | 76072987 | 76077770 | 4.04 |
| chr14 | 76100656 | 76101923 | 4.37 |
| chr14 | 76177269 | 76178906 | 3.36 |
| chr14 | 76448012 | 76449105 | 4.04 |
| chr14 | 76470332 | 76471312 | 3.7  |
| chr14 | 77153952 | 77155235 | 4.37 |
| chr14 | 77205669 | 77206537 | 4.04 |
| chr14 | 77206823 | 77208322 | 3.36 |
| chr14 | 77358625 | 77360139 | 4.37 |
| chr14 | 77360779 | 77361827 | 4.71 |
| chr14 | 77381035 | 77381883 | 4.37 |
| chr14 | 77384623 | 77386018 | 4.37 |
| chr14 | 77419389 | 77420471 | 4.37 |
| chr14 | 77422722 | 77423576 | 3.36 |
| chr14 | 77431559 | 77432680 | 3.03 |
| chr14 | 77446545 | 77449027 | 5.72 |
| chr14 | 77473473 | 77475246 | 5.38 |
| chr14 | 77477159 | 77478377 | 4.71 |
| chr14 | 77491957 | 77493102 | 3.7  |
| chr14 | 77494028 | 77495719 | 4.04 |
| chr14 | 77498983 | 77500869 | 7.74 |
| chr14 | 77506380 | 77507188 | 3.03 |
| chr14 | 77518833 | 77519916 | 3.36 |
| chr14 | 77525446 | 77526371 | 3.36 |
| chr14 | 77554183 | 77555672 | 4.04 |
| chr14 | 77556459 | 77558776 | 9.75 |
| chr14 | 77563547 | 77564928 | 4.37 |
| chr14 | 77607192 | 77608166 | 3.36 |
| chr14 | 77635986 | 77637356 | 4.04 |
| chr14 | 77866101 | 77867404 | 3.7  |
| chr14 | 78097706 | 78101549 | 11.1 |
| chr14 | 78302202 | 78303084 | 2.69 |
| chr14 | 78410968 | 78411799 | 3.36 |
| chr14 | 78412112 | 78415180 | 6.39 |
| chr14 | 78774105 | 78774932 | 3.36 |
| chr14 | 79039604 | 79041101 | 5.38 |

|       |          |          |       |
|-------|----------|----------|-------|
| chr14 | 79080370 | 79081489 | 1.35  |
| chr14 | 80602254 | 80604138 | 5.05  |
| chr14 | 80699632 | 80700336 | 3.7   |
| chr14 | 80702879 | 80704749 | 7.74  |
| chr14 | 80906044 | 80907040 | 3.36  |
| chr14 | 80916682 | 80918056 | 4.37  |
| chr14 | 80978550 | 80979557 | 3.7   |
| chr14 | 81008812 | 81010412 | 3.7   |
| chr14 | 81145358 | 81146443 | 4.37  |
| chr14 | 81148173 | 81149686 | 3.7   |
| chr14 | 81333692 | 81334894 | 7.4   |
| chr14 | 81502216 | 81503101 | 3.7   |
| chr14 | 81685234 | 81686500 | 4.04  |
| chr14 | 81712824 | 81714323 | 4.04  |
| chr14 | 81752908 | 81753728 | 3.7   |
| chr14 | 82135289 | 82136054 | 1.68  |
| chr14 | 82630875 | 82632204 | 6.39  |
| chr14 | 82775556 | 82776373 | 4.71  |
| chr14 | 85520041 | 85521223 | 4.37  |
| chr14 | 85578778 | 85579916 | 4.04  |
| chr14 | 86096424 | 86097349 | 3.7   |
| chr14 | 86838124 | 86839618 | 5.72  |
| chr14 | 88115815 | 88116732 | 2.02  |
| chr14 | 88598584 | 88599772 | 4.71  |
| chr14 | 89001690 | 89002545 | 3.36  |
| chr14 | 89232017 | 89233638 | 8.41  |
| chr14 | 89241486 | 89242425 | 3.36  |
| chr14 | 89346301 | 89347237 | 4.71  |
| chr14 | 89349939 | 89351068 | 3.7   |
| chr14 | 89418948 | 89419981 | 3.03  |
| chr14 | 90064209 | 90066412 | 6.73  |
| chr14 | 90149335 | 90151288 | 5.72  |
| chr14 | 90339639 | 90341141 | 5.38  |
| chr14 | 90421575 | 90423333 | 4.04  |
| chr14 | 90520744 | 90521638 | 2.69  |
| chr14 | 90704580 | 90707429 | 9.08  |
| chr14 | 90849221 | 90850488 | 4.37  |
| chr14 | 90865404 | 90866639 | 5.38  |
| chr14 | 90909655 | 90911111 | 5.38  |
| chr14 | 90913695 | 90915177 | 5.05  |
| chr14 | 90938868 | 90940135 | 3.7   |
| chr14 | 90940371 | 90943806 | 12.11 |
| chr14 | 90975027 | 90976278 | 4.37  |

|       |          |          |       |
|-------|----------|----------|-------|
| chr14 | 91233857 | 91234993 | 3.7   |
| chr14 | 91289007 | 91291117 | 5.38  |
| chr14 | 91404462 | 91405935 | 6.39  |
| chr14 | 91420694 | 91421851 | 4.37  |
| chr14 | 91593212 | 91594804 | 5.38  |
| chr14 | 91742384 | 91743528 | 5.05  |
| chr14 | 91791838 | 91792596 | 4.04  |
| chr14 | 91797061 | 91798262 | 4.71  |
| chr14 | 91844571 | 91845376 | 1.68  |
| chr14 | 91883624 | 91884730 | 4.04  |
| chr14 | 91904188 | 91906373 | 7.74  |
| chr14 | 91976164 | 91976965 | 3.7   |
| chr14 | 92061180 | 92062987 | 12.78 |
| chr14 | 92145064 | 92148066 | 5.38  |
| chr14 | 92156521 | 92157791 | 3.7   |
| chr14 | 92218190 | 92219024 | 4.04  |
| chr14 | 92221340 | 92222462 | 4.04  |
| chr14 | 92228423 | 92229509 | 4.71  |
| chr14 | 92272455 | 92274502 | 5.38  |
| chr14 | 92295672 | 92296470 | 4.37  |
| chr14 | 92372747 | 92373507 | 3.7   |
| chr14 | 92505605 | 92507256 | 3.7   |
| chr14 | 92710042 | 92713444 | 10.09 |
| chr14 | 93093633 | 93094871 | 4.71  |
| chr14 | 93227186 | 93228276 | 4.37  |
| chr14 | 93252196 | 93253462 | 5.05  |
| chr14 | 93255015 | 93256622 | 4.04  |
| chr14 | 93358600 | 93360699 | 6.39  |
| chr14 | 93373070 | 93373876 | 2.02  |
| chr14 | 93382028 | 93382848 | 1.68  |
| chr14 | 93393374 | 93394594 | 3.36  |
| chr14 | 93439433 | 93441306 | 3.7   |
| chr14 | 93443937 | 93446650 | 5.05  |
| chr14 | 93482786 | 93484329 | 5.05  |
| chr14 | 93510849 | 93512058 | 3.7   |
| chr14 | 93579010 | 93580459 | 4.71  |
| chr14 | 93581902 | 93582810 | 4.37  |
| chr14 | 93603818 | 93604625 | 3.36  |
| chr14 | 93673027 | 93674266 | 4.04  |
| chr14 | 93799381 | 93800152 | 4.71  |
| chr14 | 93986020 | 93988511 | 7.74  |
| chr14 | 94021791 | 94022933 | 4.71  |
| chr14 | 94425169 | 94426077 | 3.36  |

|       |           |           |       |
|-------|-----------|-----------|-------|
| chr14 | 94538492  | 94542470  | 7.06  |
| chr14 | 94774248  | 94775300  | 3.36  |
| chr14 | 94872825  | 94874183  | 4.71  |
| chr14 | 94930451  | 94933030  | 8.07  |
| chr14 | 94943838  | 94944755  | 3.7   |
| chr14 | 95065240  | 95067380  | 5.05  |
| chr14 | 95076434  | 95077682  | 5.38  |
| chr14 | 95081995  | 95086631  | 14.8  |
| chr14 | 95090776  | 95091605  | 2.35  |
| chr14 | 95102810  | 95103931  | 4.04  |
| chr14 | 95112000  | 95112891  | 3.03  |
| chr14 | 95284617  | 95285839  | 3.36  |
| chr14 | 95289792  | 95291117  | 6.05  |
| chr14 | 95522412  | 95523524  | 4.37  |
| chr14 | 95845727  | 95846843  | 4.04  |
| chr14 | 96207004  | 96208333  | 5.05  |
| chr14 | 96271863  | 96273079  | 4.04  |
| chr14 | 96457224  | 96458944  | 5.72  |
| chr14 | 96476592  | 96478284  | 5.38  |
| chr14 | 96505088  | 96506603  | 4.04  |
| chr14 | 96561700  | 96563097  | 6.39  |
| chr14 | 96578396  | 96582356  | 10.09 |
| chr14 | 96583086  | 96584530  | 6.05  |
| chr14 | 96584784  | 96585810  | 2.35  |
| chr14 | 96670259  | 96671431  | 6.05  |
| chr14 | 96967804  | 96969027  | 4.04  |
| chr14 | 97131898  | 97132631  | 3.03  |
| chr14 | 97466165  | 97467125  | 3.7   |
| chr14 | 98097927  | 98098943  | 2.69  |
| chr14 | 98517815  | 98518669  | 2.35  |
| chr14 | 99218213  | 99219395  | 1.35  |
| chr14 | 99221686  | 99222523  | 3.36  |
| chr14 | 99348009  | 99348780  | 4.04  |
| chr14 | 99469108  | 99471064  | 5.38  |
| chr14 | 99738091  | 99740553  | 4.04  |
| chr14 | 99944659  | 99946018  | 4.71  |
| chr14 | 99946881  | 99948068  | 4.37  |
| chr14 | 100014873 | 100015695 | 3.03  |
| chr14 | 100040035 | 100041147 | 4.37  |
| chr14 | 100045230 | 100046334 | 3.7   |
| chr14 | 100071272 | 100072455 | 3.7   |
| chr14 | 100120403 | 100121677 | 4.04  |
| chr14 | 100144125 | 100145623 | 5.72  |

|       |           |           |       |
|-------|-----------|-----------|-------|
| chr14 | 100168938 | 100171173 | 4.04  |
| chr14 | 100176013 | 100177349 | 4.04  |
| chr14 | 100244585 | 100246113 | 5.05  |
| chr14 | 100368058 | 100372057 | 12.78 |
| chr14 | 100428024 | 100429447 | 8.41  |
| chr14 | 100432478 | 100433389 | 3.03  |
| chr14 | 100435345 | 100436960 | 3.7   |
| chr14 | 100467408 | 100471611 | 8.41  |
| chr14 | 100477865 | 100479106 | 5.05  |
| chr14 | 100490258 | 100492145 | 4.37  |
| chr14 | 100525292 | 100526452 | 3.7   |
| chr14 | 100562193 | 100563754 | 4.04  |
| chr14 | 100620896 | 100622255 | 6.39  |
| chr14 | 100640969 | 100641808 | 1.35  |
| chr14 | 100658591 | 100660085 | 3.7   |
| chr14 | 100706798 | 100708037 | 4.37  |
| chr14 | 100712312 | 100713118 | 3.03  |
| chr14 | 100773046 | 100775005 | 4.37  |
| chr14 | 101052895 | 101053778 | 3.36  |
| chr14 | 101275456 | 101278060 | 5.72  |
| chr14 | 101369251 | 101370255 | 3.7   |
| chr14 | 101523226 | 101524376 | 6.05  |
| chr14 | 101538928 | 101540401 | 5.05  |
| chr14 | 101674586 | 101677833 | 18.84 |
| chr14 | 101681565 | 101683009 | 3.7   |
| chr14 | 101781711 | 101783536 | 7.74  |
| chr14 | 101784452 | 101785109 | 3.36  |
| chr14 | 101789683 | 101791460 | 7.06  |
| chr14 | 101802179 | 101803187 | 3.7   |
| chr14 | 101814222 | 101816044 | 4.71  |
| chr14 | 101849445 | 101851084 | 5.72  |
| chr14 | 101873664 | 101874587 | 3.36  |
| chr14 | 101943117 | 101944227 | 3.7   |
| chr14 | 101946956 | 101948147 | 3.7   |
| chr14 | 102135598 | 102137562 | 4.71  |
| chr14 | 102204216 | 102205145 | 3.36  |
| chr14 | 102206644 | 102208081 | 7.06  |
| chr14 | 102260019 | 102261044 | 4.04  |
| chr14 | 102276051 | 102277308 | 3.7   |
| chr14 | 102413828 | 102415298 | 3.36  |
| chr14 | 102465830 | 102466882 | 3.7   |
| chr14 | 102521201 | 102522184 | 3.36  |
| chr14 | 102553507 | 102554833 | 4.04  |

|       |           |           |       |
|-------|-----------|-----------|-------|
| chr14 | 102562747 | 102564665 | 5.38  |
| chr14 | 102577271 | 102578340 | 4.04  |
| chr14 | 102582511 | 102584954 | 6.39  |
| chr14 | 102605377 | 102606356 | 4.37  |
| chr14 | 102780116 | 102781600 | 3.7   |
| chr14 | 102782684 | 102783571 | 2.35  |
| chr14 | 102947615 | 102948619 | 4.37  |
| chr14 | 102956344 | 102957212 | 4.04  |
| chr14 | 103057748 | 103058826 | 4.71  |
| chr14 | 103157086 | 103157958 | 3.03  |
| chr14 | 103207352 | 103208748 | 6.39  |
| chr14 | 103323676 | 103324724 | 3.7   |
| chr14 | 103383601 | 103384425 | 2.69  |
| chr14 | 103454172 | 103455155 | 4.04  |
| chr14 | 103477194 | 103478331 | 3.03  |
| chr14 | 103506961 | 103508114 | 6.05  |
| chr14 | 103627231 | 103628932 | 4.04  |
| chr14 | 103635480 | 103637481 | 4.37  |
| chr14 | 103637958 | 103642329 | 8.41  |
| chr14 | 103658281 | 103660313 | 4.04  |
| chr14 | 103666349 | 103672970 | 11.77 |
| chr14 | 103704422 | 103705774 | 4.71  |
| chr14 | 103706045 | 103707724 | 3.36  |
| chr14 | 103799738 | 103801000 | 4.04  |
| chr14 | 103820630 | 103821441 | 4.04  |
| chr14 | 103828438 | 103830431 | 7.74  |
| chr14 | 103851555 | 103852865 | 3.7   |
| chr14 | 103986923 | 103987979 | 3.7   |
| chr14 | 104077161 | 104078302 | 4.71  |
| chr14 | 104094743 | 104095609 | 3.7   |
| chr14 | 104202245 | 104203152 | 5.05  |
| chr14 | 104320129 | 104322227 | 5.05  |
| chr14 | 104358406 | 104359387 | 3.03  |
| chr14 | 104367014 | 104368039 | 5.05  |
| chr14 | 104387219 | 104388209 | 4.04  |
| chr14 | 104455158 | 104456352 | 5.38  |
| chr14 | 104531912 | 104534098 | 7.74  |
| chr14 | 104544017 | 104545043 | 5.05  |
| chr14 | 104589982 | 104590860 | 4.04  |
| chr14 | 104595274 | 104596749 | 4.71  |
| chr14 | 104699039 | 104702525 | 6.05  |
| chr14 | 104817770 | 104818681 | 3.7   |
| chr14 | 104825682 | 104826747 | 1.68  |

|       |           |           |       |
|-------|-----------|-----------|-------|
| chr14 | 104846377 | 104847225 | 3.03  |
| chr14 | 104864017 | 104864925 | 3.7   |
| chr14 | 104915058 | 104916156 | 3.7   |
| chr14 | 104948389 | 104949518 | 4.37  |
| chr14 | 105095120 | 105096118 | 3.7   |
| chr14 | 105118335 | 105121129 | 4.71  |
| chr14 | 105154824 | 105156053 | 4.37  |
| chr14 | 105181435 | 105182357 | 3.36  |
| chr14 | 105236898 | 105238210 | 2.69  |
| chr14 | 105240454 | 105241617 | 5.72  |
| chr14 | 105265636 | 105266810 | 1.68  |
| chr14 | 105378333 | 105379176 | 3.36  |
| chr14 | 105399212 | 105400208 | 4.71  |
| chr14 | 105405982 | 105407005 | 1.68  |
| chr14 | 105422827 | 105423683 | 4.37  |
| chr14 | 105434091 | 105435066 | 3.36  |
| chr14 | 105438745 | 105440063 | 4.37  |
| chr14 | 105480650 | 105481592 | 3.03  |
| chr14 | 105486658 | 105487940 | 2.69  |
| chr14 | 105539101 | 105540048 | 1.68  |
| chr14 | 105557662 | 105558732 | 4.04  |
| chr14 | 105566925 | 105567870 | 3.36  |
| chr14 | 105568557 | 105569350 | 3.36  |
| chr14 | 105585192 | 105586149 | 3.03  |
| chr14 | 105587492 | 105588544 | 3.36  |
| chr14 | 105596641 | 105600024 | 13.12 |
| chr14 | 105605689 | 105607808 | 3.7   |
| chr14 | 105653512 | 105654977 | 3.7   |
| chr14 | 105655406 | 105656228 | 3.36  |
| chr14 | 105714034 | 105715540 | 5.05  |
| chr14 | 105765659 | 105768218 | 4.71  |
| chr14 | 105781056 | 105781946 | 3.36  |
| chr14 | 105803155 | 105804195 | 4.37  |
| chr14 | 105840524 | 105841535 | 4.37  |
| chr14 | 105864212 | 105866779 | 5.05  |
| chr14 | 105933120 | 105934992 | 4.37  |
| chr14 | 105947236 | 105948643 | 4.37  |
| chr14 | 105955664 | 105957921 | 4.37  |
| chr14 | 106082553 | 106084309 | 4.37  |
| chr14 | 106096818 | 106097778 | 4.04  |
| chr14 | 106098071 | 106099361 | 4.37  |
| chr14 | 106124504 | 106126746 | 4.37  |
| chr14 | 106246059 | 106247531 | 4.37  |



|       |           |           |       |
|-------|-----------|-----------|-------|
| chr14 | 106267019 | 106267961 | 4.04  |
| chr14 | 106421281 | 106422375 | 4.04  |
| chr14 | 106785371 | 106786306 | 2.02  |
| chr14 | 106799390 | 106800328 | 2.02  |
| chr14 | 106800655 | 106805206 | 5.72  |
| chr14 | 106873241 | 106874463 | 3.03  |
| chr19 | 353734    | 354563    | 4.71  |
| chr19 | 1774414   | 1775773   | 1.35  |
| chr19 | 2833309   | 2835344   | 5.72  |
| chr19 | 2851823   | 2854329   | 7.4   |
| chr19 | 2876749   | 2878714   | 5.05  |
| chr19 | 2896168   | 2897486   | 4.71  |
| chr19 | 2916719   | 2918433   | 5.38  |
| chr19 | 2932954   | 2935105   | 9.42  |
| chr19 | 4241677   | 4242621   | 4.71  |
| chr19 | 4374578   | 4376376   | 4.37  |
| chr19 | 5503305   | 5504462   | 1.35  |
| chr19 | 6285487   | 6288357   | 5.72  |
| chr19 | 6291552   | 6292992   | 7.4   |
| chr19 | 7082311   | 7084846   | 10.09 |
| chr19 | 7821745   | 7823197   | 7.74  |
| chr19 | 8053356   | 8054163   | 0.67  |
| chr19 | 8133785   | 8135086   | 1.01  |
| chr19 | 8921532   | 8923187   | 5.05  |
| chr19 | 9264026   | 9264956   | 3.7   |
| chr19 | 9271593   | 9272923   | 3.7   |
| chr19 | 9405194   | 9407267   | 4.37  |
| chr19 | 9452047   | 9454170   | 9.08  |
| chr19 | 9491862   | 9493248   | 4.37  |
| chr19 | 9522891   | 9525552   | 6.73  |
| chr19 | 9576892   | 9578528   | 5.05  |
| chr19 | 9636505   | 9637487   | 3.36  |
| chr19 | 9638932   | 9640434   | 5.05  |
| chr19 | 9674222   | 9678733   | 7.74  |
| chr19 | 9682161   | 9684930   | 3.36  |
| chr19 | 9720591   | 9722351   | 7.06  |
| chr19 | 9763367   | 9764679   | 4.37  |
| chr19 | 9867772   | 9869717   | 6.05  |
| chr19 | 10217130  | 10217956  | 2.02  |
| chr19 | 10295055  | 10295959  | 5.05  |
| chr19 | 10527017  | 10528031  | 4.04  |
| chr19 | 10530178  | 10531378  | 4.04  |
| chr19 | 10735643  | 10736804  | 5.38  |

|       |          |          |       |
|-------|----------|----------|-------|
| chr19 | 10859302 | 10860257 | 3.36  |
| chr19 | 11038672 | 11040045 | 6.05  |
| chr19 | 11057819 | 11058805 | 2.69  |
| chr19 | 11062941 | 11064017 | 5.05  |
| chr19 | 11070847 | 11071945 | 3.36  |
| chr19 | 11308082 | 11309004 | 4.04  |
| chr19 | 11375871 | 11376746 | 3.7   |
| chr19 | 11589346 | 11590337 | 2.35  |
| chr19 | 11711186 | 11723014 | 7.06  |
| chr19 | 11724854 | 11726004 | 4.04  |
| chr19 | 11726644 | 11734018 | 13.12 |
| chr19 | 11743498 | 11744830 | 4.37  |
| chr19 | 11756354 | 11759895 | 5.05  |
| chr19 | 11760236 | 11769535 | 15.47 |
| chr19 | 11774243 | 11775984 | 4.04  |
| chr19 | 11779925 | 11782097 | 4.71  |
| chr19 | 11788446 | 11789744 | 4.71  |
| chr19 | 11790078 | 11799264 | 9.42  |
| chr19 | 11799542 | 11801033 | 3.36  |
| chr19 | 11801689 | 11803608 | 3.7   |
| chr19 | 11817471 | 11818555 | 3.36  |
| chr19 | 11827453 | 11829182 | 3.7   |
| chr19 | 11829600 | 11838371 | 13.45 |
| chr19 | 11838873 | 11842770 | 6.05  |
| chr19 | 11848548 | 11850650 | 4.71  |
| chr19 | 11855322 | 11856203 | 3.7   |
| chr19 | 11857735 | 11858996 | 4.04  |
| chr19 | 11865160 | 11869059 | 11.77 |
| chr19 | 11875546 | 11876573 | 3.36  |
| chr19 | 11878359 | 11879343 | 3.03  |
| chr19 | 11885094 | 11885953 | 3.7   |
| chr19 | 11886727 | 11889422 | 4.04  |
| chr19 | 11890444 | 11894346 | 8.41  |
| chr19 | 11907893 | 11910115 | 4.04  |
| chr19 | 11914087 | 11922635 | 12.78 |
| chr19 | 11924266 | 11925674 | 4.04  |
| chr19 | 11931379 | 11932238 | 3.03  |
| chr19 | 11938054 | 11939697 | 4.37  |
| chr19 | 11941816 | 11945362 | 8.07  |
| chr19 | 11971644 | 11972933 | 3.7   |
| chr19 | 11978410 | 11980768 | 6.05  |
| chr19 | 11985368 | 11987615 | 4.71  |
| chr19 | 11991007 | 11992572 | 4.37  |

|       |          |          |       |
|-------|----------|----------|-------|
| chr19 | 11997661 | 11999106 | 4.37  |
| chr19 | 12015094 | 12017768 | 7.4   |
| chr19 | 12022221 | 12024420 | 4.71  |
| chr19 | 12026208 | 12027180 | 4.04  |
| chr19 | 12035199 | 12036621 | 5.38  |
| chr19 | 12041834 | 12043069 | 5.38  |
| chr19 | 12043722 | 12045677 | 5.05  |
| chr19 | 12048427 | 12049307 | 3.7   |
| chr19 | 12050348 | 12051248 | 4.04  |
| chr19 | 12052287 | 12061771 | 15.47 |
| chr19 | 12062002 | 12065758 | 4.37  |
| chr19 | 12065989 | 12067923 | 4.37  |
| chr19 | 12069697 | 12070913 | 4.37  |
| chr19 | 12074805 | 12076183 | 4.37  |
| chr19 | 12081619 | 12083740 | 5.05  |
| chr19 | 12088295 | 12094820 | 8.07  |
| chr19 | 12095199 | 12099454 | 5.38  |
| chr19 | 12107110 | 12108582 | 3.7   |
| chr19 | 12121684 | 12129847 | 12.78 |
| chr19 | 12130052 | 12134110 | 5.38  |
| chr19 | 12135640 | 12140404 | 7.74  |
| chr19 | 12140953 | 12141960 | 4.37  |
| chr19 | 12145922 | 12147308 | 4.04  |
| chr19 | 12151335 | 12156389 | 9.42  |
| chr19 | 12156878 | 12159203 | 5.72  |
| chr19 | 12160600 | 12161971 | 5.05  |
| chr19 | 12162889 | 12164373 | 4.04  |
| chr19 | 12174418 | 12177504 | 3.7   |
| chr19 | 12184059 | 12189137 | 8.75  |
| chr19 | 12191585 | 12192707 | 4.04  |
| chr19 | 12198061 | 12199726 | 5.38  |
| chr19 | 12201654 | 12202480 | 3.36  |
| chr19 | 12222095 | 12224776 | 6.39  |
| chr19 | 12234797 | 12235998 | 4.04  |
| chr19 | 12236557 | 12237992 | 4.37  |
| chr19 | 12238613 | 12240529 | 5.05  |
| chr19 | 12241056 | 12245435 | 8.75  |
| chr19 | 12250088 | 12252576 | 4.37  |
| chr19 | 12255399 | 12258977 | 6.05  |
| chr19 | 12261108 | 12262189 | 3.36  |
| chr19 | 12264809 | 12265682 | 3.7   |
| chr19 | 12266183 | 12267226 | 3.7   |
| chr19 | 12275379 | 12276542 | 4.04  |

|       |          |          |       |
|-------|----------|----------|-------|
| chr19 | 12286121 | 12288410 | 4.37  |
| chr19 | 12288693 | 12289510 | 4.04  |
| chr19 | 12292522 | 12300057 | 9.75  |
| chr19 | 12300697 | 12302589 | 3.7   |
| chr19 | 12304962 | 12308204 | 3.7   |
| chr19 | 12308467 | 12311201 | 4.37  |
| chr19 | 12318133 | 12321071 | 5.72  |
| chr19 | 12324864 | 12326262 | 3.36  |
| chr19 | 12327574 | 12329026 | 4.37  |
| chr19 | 12330609 | 12332027 | 3.7   |
| chr19 | 12333753 | 12334729 | 3.7   |
| chr19 | 12335396 | 12336900 | 3.7   |
| chr19 | 12340601 | 12342191 | 4.37  |
| chr19 | 12346065 | 12347688 | 3.7   |
| chr19 | 12353281 | 12359983 | 11.44 |
| chr19 | 12360896 | 12363679 | 4.04  |
| chr19 | 12367427 | 12368463 | 4.04  |
| chr19 | 12370022 | 12374489 | 6.05  |
| chr19 | 12374921 | 12376441 | 3.03  |
| chr19 | 12378874 | 12379906 | 4.37  |
| chr19 | 12381446 | 12390887 | 11.77 |
| chr19 | 12391095 | 12393412 | 4.04  |
| chr19 | 12399300 | 12400151 | 3.36  |
| chr19 | 12403897 | 12406467 | 3.7   |
| chr19 | 12409767 | 12410573 | 3.7   |
| chr19 | 12421101 | 12422710 | 4.71  |
| chr19 | 12425056 | 12426262 | 4.37  |
| chr19 | 12427059 | 12432404 | 7.74  |
| chr19 | 12433168 | 12434899 | 4.04  |
| chr19 | 12438185 | 12439502 | 5.05  |
| chr19 | 12443428 | 12447131 | 3.7   |
| chr19 | 12447527 | 12449513 | 4.71  |
| chr19 | 12450305 | 12451203 | 4.04  |
| chr19 | 12454703 | 12459066 | 7.06  |
| chr19 | 12459922 | 12465932 | 9.75  |
| chr19 | 12467122 | 12470343 | 4.71  |
| chr19 | 12475294 | 12477180 | 3.7   |
| chr19 | 12480550 | 12481584 | 4.37  |
| chr19 | 12484309 | 12485894 | 4.37  |
| chr19 | 12487947 | 12492416 | 7.4   |
| chr19 | 12492832 | 12493908 | 4.04  |
| chr19 | 12494837 | 12496282 | 3.36  |
| chr19 | 12501315 | 12503176 | 6.05  |

|       |          |          |       |
|-------|----------|----------|-------|
| chr19 | 12505074 | 12506262 | 5.38  |
| chr19 | 12521652 | 12522602 | 3.7   |
| chr19 | 12523039 | 12525825 | 5.38  |
| chr19 | 12527545 | 12530199 | 6.05  |
| chr19 | 12533028 | 12533873 | 3.7   |
| chr19 | 12535510 | 12536882 | 3.7   |
| chr19 | 12541017 | 12542832 | 9.08  |
| chr19 | 12544233 | 12545164 | 4.04  |
| chr19 | 12555184 | 12556263 | 5.05  |
| chr19 | 12560010 | 12561114 | 4.04  |
| chr19 | 12568431 | 12569673 | 3.7   |
| chr19 | 12569983 | 12571101 | 4.04  |
| chr19 | 12571878 | 12578199 | 11.77 |
| chr19 | 12579419 | 12591399 | 5.38  |
| chr19 | 12605609 | 12607077 | 4.37  |
| chr19 | 12621396 | 12622353 | 4.71  |
| chr19 | 12623601 | 12626838 | 5.05  |
| chr19 | 12627741 | 12629102 | 4.37  |
| chr19 | 12629791 | 12642782 | 17.15 |
| chr19 | 12643233 | 12649616 | 6.05  |
| chr19 | 12650280 | 12651688 | 5.05  |
| chr19 | 12652682 | 12658460 | 6.05  |
| chr19 | 12659255 | 12660712 | 3.36  |
| chr19 | 12688099 | 12689874 | 4.37  |
| chr19 | 12690622 | 12693217 | 8.75  |
| chr19 | 12698953 | 12700033 | 5.72  |
| chr19 | 12726584 | 12727403 | 3.36  |
| chr19 | 12728225 | 12729357 | 4.71  |
| chr19 | 12733709 | 12734857 | 4.04  |
| chr19 | 12737554 | 12742332 | 14.46 |
| chr19 | 12743730 | 12745319 | 3.7   |
| chr19 | 12888680 | 12889646 | 4.71  |
| chr19 | 12904166 | 12905035 | 3.36  |
| chr19 | 12994211 | 12996140 | 11.1  |
| chr19 | 13790959 | 13792353 | 5.72  |
| chr19 | 14031362 | 14032177 | 3.03  |
| chr19 | 14272322 | 14273230 | 1.35  |
| chr19 | 14430937 | 14431922 | 3.36  |
| chr19 | 14616289 | 14617613 | 5.05  |
| chr19 | 14729747 | 14730803 | 4.04  |
| chr19 | 14748171 | 14749464 | 4.71  |
| chr19 | 14826202 | 14830810 | 12.11 |
| chr19 | 14832596 | 14833690 | 4.71  |

|       |          |          |       |
|-------|----------|----------|-------|
| chr19 | 14839000 | 14840244 | 4.04  |
| chr19 | 15069626 | 15070971 | 5.38  |
| chr19 | 15275689 | 15277344 | 4.71  |
| chr19 | 16089317 | 16090164 | 2.02  |
| chr19 | 16184677 | 16185647 | 4.37  |
| chr19 | 16283405 | 16284618 | 4.71  |
| chr19 | 16331079 | 16333079 | 10.43 |
| chr19 | 16574099 | 16575324 | 4.71  |
| chr19 | 16906025 | 16907273 | 6.05  |
| chr19 | 16908443 | 16909302 | 3.36  |
| chr19 | 16992370 | 16993772 | 8.07  |
| chr19 | 17023334 | 17025191 | 4.37  |
| chr19 | 18026673 | 18027563 | 3.36  |
| chr19 | 18974222 | 18975068 | 1.35  |
| chr19 | 19242633 | 19243727 | 4.04  |
| chr19 | 19344889 | 19345941 | 3.36  |
| chr19 | 19519838 | 19520790 | 5.38  |
| chr19 | 19578523 | 19580165 | 6.73  |
| chr19 | 19626331 | 19627372 | 3.36  |
| chr19 | 19660287 | 19661144 | 3.03  |
| chr19 | 19774157 | 19775230 | 4.37  |
| chr19 | 19784708 | 19785965 | 4.37  |
| chr19 | 19787591 | 19789044 | 5.72  |
| chr19 | 19789317 | 19794608 | 6.05  |
| chr19 | 19795064 | 19796062 | 4.04  |
| chr19 | 19807185 | 19808908 | 4.71  |
| chr19 | 19811408 | 19812871 | 4.71  |
| chr19 | 19813374 | 19815039 | 3.7   |
| chr19 | 19815631 | 19833704 | 14.8  |
| chr19 | 19838802 | 19839789 | 3.36  |
| chr19 | 19842920 | 19844563 | 4.04  |
| chr19 | 19849796 | 19851378 | 5.38  |
| chr19 | 19855375 | 19857103 | 5.05  |
| chr19 | 19859421 | 19862575 | 4.37  |
| chr19 | 19864870 | 19865698 | 3.03  |
| chr19 | 19877730 | 19879140 | 4.04  |
| chr19 | 19888003 | 19889974 | 4.71  |
| chr19 | 19900528 | 19901706 | 4.37  |
| chr19 | 19903355 | 19908307 | 5.38  |
| chr19 | 19915862 | 19918361 | 5.05  |
| chr19 | 19919139 | 19920860 | 3.7   |
| chr19 | 19922294 | 19923680 | 3.36  |
| chr19 | 19926004 | 19927173 | 4.37  |

|       |          |          |       |
|-------|----------|----------|-------|
| chr19 | 19940358 | 19941411 | 4.04  |
| chr19 | 19943105 | 19948744 | 10.43 |
| chr19 | 19952176 | 19953624 | 3.7   |
| chr19 | 19956593 | 19957607 | 5.38  |
| chr19 | 19969445 | 19970538 | 3.36  |
| chr19 | 19971071 | 19972640 | 4.37  |
| chr19 | 19973858 | 19974787 | 3.36  |
| chr19 | 19976282 | 19977513 | 4.37  |
| chr19 | 19980613 | 19983058 | 4.04  |
| chr19 | 19983619 | 19984952 | 4.37  |
| chr19 | 19986806 | 19988153 | 4.37  |
| chr19 | 19994201 | 19995579 | 3.7   |
| chr19 | 19996464 | 19997790 | 4.37  |
| chr19 | 19998021 | 20004505 | 6.05  |
| chr19 | 20006466 | 20007588 | 4.71  |
| chr19 | 20008359 | 20010006 | 5.05  |
| chr19 | 20010723 | 20012192 | 4.71  |
| chr19 | 20015449 | 20018377 | 5.38  |
| chr19 | 20020320 | 20023011 | 6.39  |
| chr19 | 20039569 | 20040654 | 4.04  |
| chr19 | 20042678 | 20048522 | 6.73  |
| chr19 | 20066914 | 20067861 | 3.36  |
| chr19 | 20074703 | 20075687 | 4.37  |
| chr19 | 20077205 | 20078815 | 4.37  |
| chr19 | 20106077 | 20106931 | 4.04  |
| chr19 | 20107145 | 20107931 | 3.7   |
| chr19 | 20116058 | 20120929 | 8.75  |
| chr19 | 20123809 | 20125307 | 3.7   |
| chr19 | 20125935 | 20127995 | 3.7   |
| chr19 | 20141115 | 20142627 | 3.36  |
| chr19 | 20160531 | 20161535 | 3.7   |
| chr19 | 20177553 | 20179089 | 4.04  |
| chr19 | 20217585 | 20218699 | 3.7   |
| chr19 | 20228157 | 20231497 | 5.72  |
| chr19 | 20283600 | 20284540 | 4.04  |
| chr19 | 20308028 | 20311111 | 5.72  |
| chr19 | 20314390 | 20315897 | 4.04  |
| chr19 | 20692185 | 20693863 | 4.71  |
| chr19 | 20696568 | 20697426 | 4.04  |
| chr19 | 20725637 | 20730866 | 9.75  |
| chr19 | 20735275 | 20736550 | 5.05  |
| chr19 | 20807442 | 20808447 | 3.7   |
| chr19 | 20816565 | 20817335 | 4.04  |

|       |          |          |      |
|-------|----------|----------|------|
| chr19 | 20831809 | 20832699 | 3.36 |
| chr19 | 20840631 | 20841580 | 3.7  |
| chr19 | 20864500 | 20865706 | 4.37 |
| chr19 | 20873658 | 20874766 | 4.37 |
| chr19 | 20962718 | 20964132 | 4.04 |
| chr19 | 20967240 | 20968169 | 3.36 |
| chr19 | 20968931 | 20969808 | 4.04 |
| chr19 | 20978070 | 20979585 | 3.7  |
| chr19 | 20982899 | 20983803 | 3.36 |
| chr19 | 20984398 | 20991174 | 7.4  |
| chr19 | 21001038 | 21001904 | 3.7  |
| chr19 | 21014849 | 21016019 | 3.7  |
| chr19 | 21033227 | 21034505 | 4.71 |
| chr19 | 21043097 | 21044362 | 4.04 |
| chr19 | 21062710 | 21063931 | 4.37 |
| chr19 | 21069075 | 21069991 | 3.36 |
| chr19 | 21079059 | 21080551 | 4.37 |
| chr19 | 21090984 | 21092573 | 4.04 |
| chr19 | 21113685 | 21115820 | 4.71 |
| chr19 | 21128560 | 21129460 | 4.04 |
| chr19 | 21133060 | 21134506 | 3.7  |
| chr19 | 21229702 | 21231133 | 4.04 |
| chr19 | 21237195 | 21240183 | 4.04 |
| chr19 | 21247331 | 21248336 | 3.36 |
| chr19 | 21299847 | 21300728 | 4.37 |
| chr19 | 21328125 | 21329004 | 3.36 |
| chr19 | 21329230 | 21330633 | 5.05 |
| chr19 | 21338271 | 21339920 | 3.36 |
| chr19 | 21362879 | 21363857 | 3.7  |
| chr19 | 21364523 | 21366287 | 5.05 |
| chr19 | 21366593 | 21368396 | 3.36 |
| chr19 | 21377085 | 21377982 | 3.7  |
| chr19 | 21381343 | 21382970 | 3.7  |
| chr19 | 21385392 | 21386354 | 3.7  |
| chr19 | 21412606 | 21414298 | 7.74 |
| chr19 | 21435574 | 21437432 | 4.04 |
| chr19 | 21442525 | 21444422 | 4.04 |
| chr19 | 21445750 | 21447465 | 3.36 |
| chr19 | 21453982 | 21455166 | 3.7  |
| chr19 | 21461281 | 21462621 | 5.05 |
| chr19 | 21466463 | 21467777 | 4.37 |
| chr19 | 21475451 | 21478505 | 4.04 |
| chr19 | 21484192 | 21485320 | 4.04 |



|       |          |          |       |
|-------|----------|----------|-------|
| chr19 | 21496642 | 21498629 | 3.7   |
| chr19 | 21504239 | 21508085 | 5.05  |
| chr19 | 21518017 | 21520976 | 6.05  |
| chr19 | 21527140 | 21528327 | 3.36  |
| chr19 | 21530523 | 21531762 | 4.37  |
| chr19 | 21535727 | 21537229 | 4.71  |
| chr19 | 21546110 | 21547575 | 4.04  |
| chr19 | 21548320 | 21549794 | 4.37  |
| chr19 | 21554533 | 21555909 | 5.72  |
| chr19 | 21564915 | 21569867 | 7.4   |
| chr19 | 21574173 | 21575178 | 3.7   |
| chr19 | 21582680 | 21584162 | 3.7   |
| chr19 | 21596120 | 21597112 | 3.36  |
| chr19 | 21601248 | 21603777 | 4.71  |
| chr19 | 21605193 | 21609374 | 8.07  |
| chr19 | 21614887 | 21617727 | 4.71  |
| chr19 | 21636741 | 21641290 | 5.72  |
| chr19 | 21657212 | 21658519 | 4.37  |
| chr19 | 21665473 | 21666183 | 3.7   |
| chr19 | 21671057 | 21671924 | 3.36  |
| chr19 | 21675745 | 21677274 | 3.36  |
| chr19 | 21680624 | 21681839 | 4.04  |
| chr19 | 21690831 | 21692066 | 4.37  |
| chr19 | 21696295 | 21697575 | 4.71  |
| chr19 | 21698917 | 21701096 | 5.05  |
| chr19 | 21701466 | 21704378 | 12.45 |
| chr19 | 21705701 | 21707128 | 3.36  |
| chr19 | 21718498 | 21720960 | 5.38  |
| chr19 | 21725459 | 21727067 | 3.36  |
| chr19 | 21737057 | 21738255 | 4.37  |
| chr19 | 21739920 | 21741018 | 4.04  |
| chr19 | 21742488 | 21743347 | 3.7   |
| chr19 | 21746872 | 21748027 | 4.04  |
| chr19 | 21748832 | 21749721 | 3.7   |
| chr19 | 21752569 | 21755798 | 4.71  |
| chr19 | 21769851 | 21771074 | 3.36  |
| chr19 | 21837207 | 21838387 | 3.7   |
| chr19 | 21857008 | 21858247 | 5.05  |
| chr19 | 21862573 | 21863925 | 5.05  |
| chr19 | 21887793 | 21888852 | 3.7   |
| chr19 | 21905966 | 21907162 | 4.04  |
| chr19 | 21908662 | 21911733 | 5.72  |
| chr19 | 21912958 | 21914153 | 4.71  |

|       |          |          |       |
|-------|----------|----------|-------|
| chr19 | 21939624 | 21942346 | 5.05  |
| chr19 | 21943349 | 21946095 | 5.72  |
| chr19 | 21948244 | 21950927 | 5.38  |
| chr19 | 21983051 | 21984191 | 3.36  |
| chr19 | 21989297 | 21995299 | 6.73  |
| chr19 | 21995738 | 21997235 | 4.04  |
| chr19 | 21998353 | 21999955 | 4.37  |
| chr19 | 22001911 | 22003132 | 4.04  |
| chr19 | 22003784 | 22005421 | 4.37  |
| chr19 | 22006912 | 22012101 | 5.05  |
| chr19 | 22012354 | 22013894 | 4.37  |
| chr19 | 22014099 | 22015513 | 4.37  |
| chr19 | 22018346 | 22019075 | 3.7   |
| chr19 | 22083826 | 22084852 | 4.37  |
| chr19 | 22107448 | 22108434 | 3.36  |
| chr19 | 22129415 | 22131517 | 11.1  |
| chr19 | 22143637 | 22145131 | 5.72  |
| chr19 | 22152744 | 22155650 | 5.38  |
| chr19 | 22228332 | 22229438 | 3.36  |
| chr19 | 22253460 | 22254526 | 3.36  |
| chr19 | 22268645 | 22272475 | 5.05  |
| chr19 | 22272780 | 22273981 | 3.7   |
| chr19 | 22277235 | 22278308 | 4.37  |
| chr19 | 22293523 | 22294964 | 3.36  |
| chr19 | 22326415 | 22328333 | 7.4   |
| chr19 | 22361515 | 22363197 | 4.04  |
| chr19 | 22496113 | 22497408 | 4.71  |
| chr19 | 22511224 | 22512387 | 4.37  |
| chr19 | 22594643 | 22596559 | 4.04  |
| chr19 | 22606945 | 22610139 | 5.05  |
| chr19 | 22652991 | 22657007 | 10.09 |
| chr19 | 22668788 | 22669872 | 4.04  |
| chr19 | 22722347 | 22723397 | 3.03  |
| chr19 | 22766394 | 22767206 | 3.36  |
| chr19 | 22803252 | 22804180 | 5.05  |
| chr19 | 23039041 | 23042162 | 7.74  |
| chr19 | 23060393 | 23061286 | 4.37  |
| chr19 | 23081698 | 23082544 | 3.36  |
| chr19 | 23126307 | 23129226 | 8.41  |
| chr19 | 23157215 | 23162109 | 7.74  |
| chr19 | 23207270 | 23208516 | 3.7   |
| chr19 | 23228606 | 23229796 | 4.71  |
| chr19 | 23233808 | 23234754 | 3.7   |

|       |          |          |       |
|-------|----------|----------|-------|
| chr19 | 23264520 | 23265330 | 3.7   |
| chr19 | 23271872 | 23274441 | 5.05  |
| chr19 | 23275347 | 23276914 | 3.7   |
| chr19 | 23279303 | 23281969 | 4.04  |
| chr19 | 23309817 | 23312484 | 4.37  |
| chr19 | 23327169 | 23330575 | 6.05  |
| chr19 | 23349382 | 23350135 | 3.36  |
| chr19 | 23403510 | 23410143 | 10.09 |
| chr19 | 23411742 | 23413846 | 4.71  |
| chr19 | 23414502 | 23417076 | 4.37  |
| chr19 | 23417924 | 23422824 | 6.05  |
| chr19 | 23423117 | 23425238 | 6.05  |
| chr19 | 23456446 | 23457549 | 4.71  |
| chr19 | 23471335 | 23472173 | 3.36  |
| chr19 | 23487916 | 23489034 | 4.04  |
| chr19 | 23513817 | 23516066 | 5.05  |
| chr19 | 23518746 | 23519775 | 4.37  |
| chr19 | 23523770 | 23530912 | 4.37  |
| chr19 | 23531250 | 23532519 | 5.72  |
| chr19 | 23533774 | 23537741 | 4.71  |
| chr19 | 23538131 | 23548498 | 5.05  |
| chr19 | 23548916 | 23550791 | 4.37  |
| chr19 | 23552980 | 23554222 | 3.36  |
| chr19 | 23554718 | 23556221 | 3.7   |
| chr19 | 23557245 | 23563916 | 4.71  |
| chr19 | 23564959 | 23566589 | 5.38  |
| chr19 | 23567254 | 23570324 | 5.05  |
| chr19 | 23620597 | 23621560 | 4.04  |
| chr19 | 23656942 | 23657872 | 3.7   |
| chr19 | 23710215 | 23711635 | 5.05  |
| chr19 | 23729300 | 23730737 | 3.36  |
| chr19 | 23741870 | 23742973 | 3.7   |
| chr19 | 23744083 | 23744898 | 3.36  |
| chr19 | 23753466 | 23754868 | 6.73  |
| chr19 | 23755145 | 23756777 | 3.7   |
| chr19 | 23769685 | 23770562 | 3.36  |
| chr19 | 23788196 | 23789048 | 4.04  |
| chr19 | 23836528 | 23838997 | 4.71  |
| chr19 | 23839498 | 23841287 | 3.7   |
| chr19 | 23848433 | 23849755 | 5.05  |
| chr19 | 23852302 | 23856400 | 5.72  |
| chr19 | 23857362 | 23858755 | 6.05  |
| chr19 | 23863407 | 23865645 | 4.37  |

|       |          |          |       |
|-------|----------|----------|-------|
| chr19 | 23922407 | 23923202 | 3.7   |
| chr19 | 23925204 | 23927254 | 3.36  |
| chr19 | 23931431 | 23932853 | 3.36  |
| chr19 | 23936691 | 23938349 | 3.7   |
| chr19 | 23961972 | 23963007 | 3.7   |
| chr19 | 24003812 | 24007608 | 8.41  |
| chr19 | 24014726 | 24016738 | 6.05  |
| chr19 | 24088001 | 24089503 | 3.36  |
| chr19 | 24107267 | 24108128 | 3.7   |
| chr19 | 24108888 | 24110199 | 4.04  |
| chr19 | 24110687 | 24112369 | 3.7   |
| chr19 | 24112728 | 24119675 | 6.05  |
| chr19 | 24137610 | 24138481 | 3.7   |
| chr19 | 24182141 | 24183611 | 4.37  |
| chr19 | 24183926 | 24185303 | 5.05  |
| chr19 | 24202114 | 24203285 | 3.36  |
| chr19 | 24275823 | 24278691 | 4.71  |
| chr19 | 24279840 | 24281945 | 3.7   |
| chr19 | 24288979 | 24290284 | 3.7   |
| chr19 | 24301085 | 24303662 | 5.05  |
| chr19 | 24305197 | 24312734 | 7.4   |
| chr19 | 24313801 | 24316555 | 4.37  |
| chr19 | 24318608 | 24320200 | 4.37  |
| chr19 | 24320528 | 24322780 | 4.04  |
| chr19 | 24339454 | 24341333 | 4.04  |
| chr19 | 24343657 | 24344657 | 3.7   |
| chr19 | 24364326 | 24365385 | 4.71  |
| chr19 | 24367939 | 24369223 | 4.71  |
| chr19 | 24378524 | 24379931 | 4.37  |
| chr19 | 24385436 | 24389563 | 5.38  |
| chr19 | 24389889 | 24415558 | 7.06  |
| chr19 | 24419874 | 24425149 | 6.73  |
| chr19 | 24433620 | 24435337 | 4.71  |
| chr19 | 24436170 | 24446282 | 5.72  |
| chr19 | 24451199 | 24453362 | 3.7   |
| chr19 | 24456187 | 24461126 | 5.38  |
| chr19 | 24461689 | 24463155 | 5.38  |
| chr19 | 24467906 | 24494917 | 8.41  |
| chr19 | 24495118 | 24504328 | 7.06  |
| chr19 | 24508743 | 24570740 | 10.09 |
| chr19 | 24571995 | 24572974 | 3.7   |
| chr19 | 24573781 | 24576990 | 5.05  |
| chr19 | 24583833 | 24584779 | 4.37  |

|       |          |          |       |
|-------|----------|----------|-------|
| chr19 | 24586426 | 24588579 | 3.7   |
| chr19 | 24593604 | 24595264 | 4.37  |
| chr19 | 27731620 | 27741292 | 43.05 |
| chr19 | 27749953 | 27750935 | 6.39  |
| chr19 | 27756815 | 27758618 | 5.38  |
| chr19 | 27759919 | 27760936 | 4.71  |
| chr19 | 27781000 | 27782809 | 4.71  |
| chr19 | 27829770 | 27831144 | 6.05  |
| chr19 | 27836623 | 27838132 | 4.37  |
| chr19 | 27838393 | 27857430 | 7.4   |
| chr19 | 27858225 | 27862258 | 5.38  |
| chr19 | 27868232 | 27870873 | 5.38  |
| chr19 | 27873414 | 27880547 | 6.39  |
| chr19 | 27880843 | 27881778 | 3.36  |
| chr19 | 27882856 | 27884062 | 3.7   |
| chr19 | 27885129 | 27888442 | 4.71  |
| chr19 | 27895608 | 27898403 | 7.06  |
| chr19 | 27905536 | 27906669 | 4.37  |
| chr19 | 27915047 | 27916606 | 3.36  |
| chr19 | 27919790 | 27921715 | 3.7   |
| chr19 | 27923240 | 27924874 | 4.37  |
| chr19 | 27928642 | 27929509 | 3.36  |
| chr19 | 27933315 | 27934637 | 4.04  |
| chr19 | 27936969 | 27937994 | 3.03  |
| chr19 | 27941804 | 27943512 | 4.37  |
| chr19 | 27964407 | 27973118 | 5.38  |
| chr19 | 27974291 | 27977796 | 5.72  |
| chr19 | 27978299 | 27980015 | 4.04  |
| chr19 | 27980271 | 27986531 | 5.38  |
| chr19 | 27987039 | 27990073 | 5.38  |
| chr19 | 27990436 | 27992183 | 5.05  |
| chr19 | 27996052 | 28007066 | 5.38  |
| chr19 | 28011260 | 28013325 | 4.37  |
| chr19 | 28014667 | 28035877 | 6.39  |
| chr19 | 28036292 | 28051337 | 6.05  |
| chr19 | 28052138 | 28053549 | 4.04  |
| chr19 | 28053964 | 28066660 | 7.06  |
| chr19 | 28068271 | 28069633 | 4.37  |
| chr19 | 28070672 | 28071630 | 3.36  |
| chr19 | 28072842 | 28075437 | 4.37  |
| chr19 | 28077050 | 28087768 | 5.38  |
| chr19 | 28093932 | 28102226 | 4.71  |
| chr19 | 28103147 | 28116727 | 6.39  |

|       |          |          |      |
|-------|----------|----------|------|
| chr19 | 28118292 | 28121912 | 5.05 |
| chr19 | 28122547 | 28125918 | 4.04 |
| chr19 | 28141063 | 28141815 | 2.35 |
| chr19 | 28151687 | 28152833 | 4.71 |
| chr19 | 28171203 | 28172384 | 2.69 |
| chr19 | 28173697 | 28175016 | 2.69 |
| chr19 | 28177058 | 28177955 | 3.03 |
| chr19 | 28178641 | 28180210 | 4.04 |
| chr19 | 28205497 | 28206716 | 4.37 |
| chr19 | 28214505 | 28217562 | 5.38 |
| chr19 | 28219234 | 28223474 | 5.38 |
| chr19 | 28224171 | 28224972 | 3.03 |
| chr19 | 28284253 | 28285447 | 2.69 |
| chr19 | 28350441 | 28351381 | 2.69 |
| chr19 | 28377116 | 28378016 | 2.02 |
| chr19 | 28382796 | 28383880 | 2.69 |
| chr19 | 28474087 | 28474830 | 1.01 |
| chr19 | 28487629 | 28488431 | 2.69 |
| chr19 | 28499661 | 28500560 | 1.68 |
| chr19 | 28502508 | 28503509 | 1.35 |
| chr19 | 28516607 | 28517780 | 1.35 |
| chr19 | 28524306 | 28525419 | 1.68 |
| chr19 | 28528215 | 28529200 | 1.35 |
| chr19 | 28533059 | 28534023 | 2.69 |
| chr19 | 28540176 | 28540907 | 3.36 |
| chr19 | 28557445 | 28558338 | 2.02 |
| chr19 | 28615793 | 28616695 | 2.69 |
| chr19 | 28645299 | 28646226 | 2.02 |
| chr19 | 28656297 | 28657212 | 1.01 |
| chr19 | 28722994 | 28726044 | 2.35 |
| chr19 | 28737373 | 28738300 | 1.01 |
| chr19 | 28817460 | 28818371 | 1.68 |
| chr19 | 28832278 | 28833108 | 2.35 |
| chr19 | 28851486 | 28853177 | 1.35 |
| chr19 | 28857989 | 28858943 | 2.02 |
| chr19 | 28876094 | 28877425 | 1.35 |
| chr19 | 29004475 | 29005231 | 2.02 |
| chr19 | 29028164 | 29029211 | 1.68 |
| chr19 | 29060772 | 29061580 | 0.67 |
| chr19 | 29072137 | 29072934 | 3.03 |
| chr19 | 29087427 | 29089287 | 1.68 |
| chr19 | 29127278 | 29128108 | 1.35 |
| chr19 | 29150969 | 29152903 | 2.35 |

|       |          |          |       |
|-------|----------|----------|-------|
| chr19 | 29156683 | 29157571 | 2.02  |
| chr19 | 29162084 | 29162960 | 1.68  |
| chr19 | 29182345 | 29183132 | 1.35  |
| chr19 | 29185576 | 29186399 | 1.68  |
| chr19 | 29215332 | 29216070 | 2.35  |
| chr19 | 29225199 | 29226739 | 1.68  |
| chr19 | 29272119 | 29273683 | 3.03  |
| chr19 | 29319399 | 29320141 | 0.67  |
| chr19 | 29320432 | 29321306 | 1.68  |
| chr19 | 29356048 | 29357081 | 1.68  |
| chr19 | 29378662 | 29380038 | 1.68  |
| chr19 | 29394751 | 29395798 | 1.68  |
| chr19 | 29403538 | 29404435 | 1.35  |
| chr19 | 29460447 | 29461601 | 1.68  |
| chr19 | 29475599 | 29476484 | 1.68  |
| chr19 | 29500161 | 29501077 | 1.35  |
| chr19 | 29569012 | 29569965 | 2.02  |
| chr19 | 29583657 | 29584616 | 1.68  |
| chr19 | 29589500 | 29590472 | 1.68  |
| chr19 | 29597112 | 29598334 | 1.01  |
| chr19 | 29599499 | 29600545 | 1.01  |
| chr19 | 29605425 | 29606374 | 2.35  |
| chr19 | 29629429 | 29631721 | 12.11 |
| chr19 | 29641414 | 29642480 | 1.35  |
| chr19 | 29758901 | 29759958 | 1.01  |
| chr19 | 29763894 | 29764984 | 1.68  |
| chr19 | 29774068 | 29775102 | 2.69  |
| chr19 | 29778293 | 29779131 | 1.01  |
| chr19 | 29783132 | 29784577 | 2.35  |
| chr19 | 29796881 | 29798008 | 1.35  |
| chr19 | 29799760 | 29800690 | 1.68  |
| chr19 | 29802114 | 29803267 | 1.35  |
| chr19 | 29806369 | 29807404 | 1.35  |
| chr19 | 29861978 | 29862826 | 1.01  |
| chr19 | 29869121 | 29870008 | 2.35  |
| chr19 | 29879039 | 29881011 | 4.37  |
| chr19 | 29906438 | 29908207 | 1.35  |
| chr19 | 29911444 | 29913386 | 2.35  |
| chr19 | 29916245 | 29917981 | 1.68  |
| chr19 | 29930185 | 29931492 | 2.35  |
| chr19 | 30009943 | 30010706 | 1.35  |
| chr19 | 30013578 | 30014248 | 1.01  |
| chr19 | 30017805 | 30018744 | 1.35  |

|       |          |          |      |
|-------|----------|----------|------|
| chr19 | 30019468 | 30022182 | 2.02 |
| chr19 | 30029521 | 30030419 | 2.69 |
| chr19 | 30043937 | 30045041 | 1.68 |
| chr19 | 30050347 | 30051193 | 2.69 |
| chr19 | 30055199 | 30056223 | 1.01 |
| chr19 | 30059098 | 30059841 | 2.02 |
| chr19 | 30141149 | 30142016 | 1.35 |
| chr19 | 30147980 | 30148861 | 1.35 |
| chr19 | 30156190 | 30157216 | 1.68 |
| chr19 | 30170912 | 30171877 | 2.02 |
| chr19 | 30199613 | 30200413 | 1.01 |
| chr19 | 30206909 | 30207783 | 1.35 |
| chr19 | 30266357 | 30267286 | 0.67 |
| chr19 | 30276586 | 30277414 | 2.02 |
| chr19 | 30339652 | 30340930 | 1.35 |
| chr19 | 30382502 | 30383744 | 1.68 |
| chr19 | 30405253 | 30406048 | 1.68 |
| chr19 | 30409289 | 30410086 | 1.35 |
| chr19 | 30432894 | 30433816 | 1.68 |
| chr19 | 30434115 | 30435221 | 1.68 |
| chr19 | 30461862 | 30462767 | 2.02 |
| chr19 | 30468124 | 30469011 | 2.69 |
| chr19 | 30493944 | 30494979 | 2.02 |
| chr19 | 30554795 | 30555766 | 1.68 |
| chr19 | 30561981 | 30562942 | 1.35 |
| chr19 | 30566993 | 30567800 | 1.35 |
| chr19 | 30634844 | 30635722 | 2.02 |
| chr19 | 30672097 | 30672962 | 2.35 |
| chr19 | 30673275 | 30675732 | 4.04 |
| chr19 | 30716897 | 30718539 | 1.35 |
| chr19 | 30734319 | 30735870 | 2.02 |
| chr19 | 30763341 | 30764144 | 1.01 |
| chr19 | 30815800 | 30817215 | 1.68 |
| chr19 | 30838076 | 30838884 | 1.35 |
| chr19 | 30840022 | 30840851 | 1.68 |
| chr19 | 30885515 | 30886457 | 1.68 |
| chr19 | 30899645 | 30900637 | 1.35 |
| chr19 | 30914814 | 30915606 | 1.35 |
| chr19 | 30950593 | 30951424 | 1.01 |
| chr19 | 30960395 | 30961098 | 2.02 |
| chr19 | 30978255 | 30979182 | 1.68 |
| chr19 | 31002766 | 31003927 | 1.68 |
| chr19 | 31008720 | 31009840 | 1.35 |



|       |          |          |      |
|-------|----------|----------|------|
| chr19 | 31028337 | 31029187 | 2.02 |
| chr19 | 31074555 | 31075643 | 2.02 |
| chr19 | 31141402 | 31142355 | 1.01 |
| chr19 | 31189405 | 31190412 | 1.68 |
| chr19 | 31202822 | 31204464 | 2.02 |
| chr19 | 31207048 | 31208594 | 1.68 |
| chr19 | 31209583 | 31210389 | 1.01 |
| chr19 | 31215139 | 31216010 | 1.35 |
| chr19 | 31222252 | 31223156 | 3.03 |
| chr19 | 31228600 | 31229968 | 1.68 |
| chr19 | 31233553 | 31234398 | 1.68 |
| chr19 | 31243020 | 31244506 | 3.03 |
| chr19 | 31256383 | 31257198 | 1.68 |
| chr19 | 31269925 | 31271010 | 2.35 |
| chr19 | 31300447 | 31301228 | 1.35 |
| chr19 | 31405864 | 31406844 | 1.35 |
| chr19 | 31463290 | 31464723 | 1.68 |
| chr19 | 31471554 | 31472407 | 1.35 |
| chr19 | 31493258 | 31494290 | 1.68 |
| chr19 | 31497176 | 31498125 | 1.68 |
| chr19 | 31500111 | 31501085 | 1.01 |
| chr19 | 31510000 | 31510955 | 1.35 |
| chr19 | 31539835 | 31540692 | 1.68 |
| chr19 | 31559864 | 31560944 | 1.68 |
| chr19 | 31569694 | 31570842 | 1.35 |
| chr19 | 31573938 | 31574969 | 1.35 |
| chr19 | 31587806 | 31589271 | 1.01 |
| chr19 | 31596222 | 31597487 | 1.35 |
| chr19 | 31610599 | 31611728 | 1.68 |
| chr19 | 31640924 | 31641789 | 0.67 |
| chr19 | 31708731 | 31709462 | 1.35 |
| chr19 | 31739026 | 31739881 | 1.68 |
| chr19 | 31807454 | 31808674 | 2.02 |
| chr19 | 31846244 | 31848235 | 2.02 |
| chr19 | 31864286 | 31865075 | 1.68 |
| chr19 | 31887900 | 31888708 | 1.35 |
| chr19 | 31968703 | 31969769 | 2.35 |
| chr19 | 32006381 | 32007246 | 1.01 |
| chr19 | 32026999 | 32028829 | 1.68 |
| chr19 | 32165019 | 32166058 | 1.35 |
| chr19 | 32176342 | 32177491 | 2.02 |
| chr19 | 32177898 | 32179061 | 1.68 |
| chr19 | 32185083 | 32186113 | 1.68 |

|       |          |          |      |
|-------|----------|----------|------|
| chr19 | 32205501 | 32206280 | 1.35 |
| chr19 | 32361678 | 32362745 | 1.35 |
| chr19 | 32386193 | 32387576 | 1.35 |
| chr19 | 32402217 | 32403098 | 2.02 |
| chr19 | 32478686 | 32479562 | 3.03 |
| chr19 | 32509280 | 32510011 | 1.68 |
| chr19 | 32523993 | 32524934 | 1.01 |
| chr19 | 32570687 | 32571684 | 1.68 |
| chr19 | 32602280 | 32603540 | 1.35 |
| chr19 | 32616096 | 32617034 | 1.35 |
| chr19 | 32628410 | 32629377 | 1.35 |
| chr19 | 32629627 | 32630528 | 1.35 |
| chr19 | 32654511 | 32655470 | 0.67 |
| chr19 | 32690520 | 32691835 | 1.35 |
| chr19 | 32721545 | 32722460 | 1.01 |
| chr19 | 32760689 | 32762122 | 1.68 |
| chr19 | 32766344 | 32767135 | 2.35 |
| chr19 | 32821056 | 32821942 | 1.01 |
| chr19 | 32878533 | 32879481 | 1.35 |
| chr19 | 32896022 | 32897200 | 2.69 |
| chr19 | 32945244 | 32946046 | 0.67 |
| chr19 | 32962187 | 32963451 | 1.01 |
| chr19 | 33001406 | 33002213 | 2.69 |
| chr19 | 33088725 | 33089741 | 1.35 |
| chr19 | 33165325 | 33166664 | 2.35 |
| chr19 | 33168062 | 33168870 | 2.02 |
| chr19 | 33226504 | 33227700 | 1.35 |
| chr19 | 33286374 | 33287185 | 1.68 |
| chr19 | 33319430 | 33320206 | 1.35 |
| chr19 | 33327023 | 33328159 | 1.01 |
| chr19 | 33332628 | 33334157 | 2.02 |
| chr19 | 33355731 | 33356999 | 1.68 |
| chr19 | 33401274 | 33402263 | 0.67 |
| chr19 | 33415641 | 33417741 | 2.02 |
| chr19 | 33443826 | 33444772 | 1.35 |
| chr19 | 33552516 | 33553421 | 1.01 |
| chr19 | 33580963 | 33581977 | 2.02 |
| chr19 | 33597476 | 33598854 | 1.01 |
| chr19 | 33608277 | 33609248 | 2.02 |
| chr19 | 33641313 | 33642241 | 1.35 |
| chr19 | 33659355 | 33660387 | 1.68 |
| chr19 | 33666945 | 33669096 | 3.7  |
| chr19 | 33696041 | 33696880 | 1.35 |

|       |          |          |      |
|-------|----------|----------|------|
| chr19 | 33700445 | 33701722 | 1.68 |
| chr19 | 33714777 | 33715665 | 1.68 |
| chr19 | 33718983 | 33719905 | 4.04 |
| chr19 | 33729180 | 33730086 | 2.02 |
| chr19 | 33731434 | 33732172 | 1.35 |
| chr19 | 33736363 | 33739138 | 2.35 |
| chr19 | 33758730 | 33760194 | 2.35 |
| chr19 | 33760520 | 33761650 | 1.35 |
| chr19 | 33764742 | 33766193 | 3.03 |
| chr19 | 33768551 | 33769563 | 1.68 |
| chr19 | 33792721 | 33794750 | 3.7  |
| chr19 | 33835272 | 33836481 | 1.35 |
| chr19 | 33838537 | 33840200 | 3.7  |
| chr19 | 33845943 | 33847182 | 5.38 |
| chr19 | 33861245 | 33862006 | 1.35 |
| chr19 | 33863626 | 33865383 | 3.03 |
| chr19 | 33909537 | 33910414 | 1.01 |
| chr19 | 33927549 | 33929047 | 2.69 |
| chr19 | 33941414 | 33942486 | 1.68 |
| chr19 | 33943350 | 33944213 | 1.01 |
| chr19 | 33966363 | 33967660 | 1.35 |
| chr19 | 34012941 | 34013793 | 1.68 |
| chr19 | 34024244 | 34025304 | 1.68 |
| chr19 | 34035211 | 34036242 | 2.35 |
| chr19 | 34037521 | 34039429 | 1.68 |
| chr19 | 34040837 | 34041642 | 1.68 |
| chr19 | 34043396 | 34044695 | 1.35 |
| chr19 | 34064590 | 34066577 | 4.04 |
| chr19 | 34070958 | 34071845 | 2.02 |
| chr19 | 34072064 | 34072857 | 1.68 |
| chr19 | 34073795 | 34074701 | 1.68 |
| chr19 | 34078025 | 34078927 | 2.02 |
| chr19 | 34091749 | 34093593 | 5.72 |
| chr19 | 34103963 | 34105151 | 2.69 |
| chr19 | 34113027 | 34114204 | 3.7  |
| chr19 | 34131562 | 34132581 | 1.35 |
| chr19 | 34144878 | 34145926 | 1.68 |
| chr19 | 34169298 | 34170227 | 2.02 |
| chr19 | 34182953 | 34183963 | 0.67 |
| chr19 | 34238504 | 34240338 | 1.68 |
| chr19 | 34245729 | 34247566 | 1.68 |
| chr19 | 34267529 | 34270232 | 3.36 |
| chr19 | 34286587 | 34287865 | 3.03 |

|       |          |          |      |
|-------|----------|----------|------|
| chr19 | 34310713 | 34312041 | 2.69 |
| chr19 | 34332258 | 34333254 | 1.68 |
| chr19 | 34348630 | 34349419 | 2.69 |
| chr19 | 34358719 | 34359788 | 1.68 |
| chr19 | 34369040 | 34370449 | 2.02 |
| chr19 | 34388382 | 34389753 | 7.4  |
| chr19 | 34396122 | 34399004 | 3.36 |
| chr19 | 34411575 | 34412808 | 1.35 |
| chr19 | 34424098 | 34425494 | 2.35 |
| chr19 | 34478939 | 34480094 | 4.04 |
| chr19 | 34515236 | 34516088 | 3.03 |
| chr19 | 34534139 | 34535269 | 2.02 |
| chr19 | 34551900 | 34552780 | 1.01 |
| chr19 | 34557037 | 34557990 | 3.03 |
| chr19 | 34574421 | 34575517 | 1.01 |
| chr19 | 34624763 | 34626595 | 2.69 |
| chr19 | 34662785 | 34664237 | 2.35 |
| chr19 | 34667989 | 34669008 | 2.02 |
| chr19 | 34675178 | 34676544 | 1.35 |
| chr19 | 34758934 | 34760425 | 2.35 |
| chr19 | 34785694 | 34786577 | 1.35 |
| chr19 | 34790996 | 34792015 | 2.35 |
| chr19 | 34810194 | 34811133 | 2.02 |
| chr19 | 34833422 | 34834793 | 2.35 |
| chr19 | 34846133 | 34847183 | 1.68 |
| chr19 | 34877870 | 34878824 | 2.69 |
| chr19 | 34919066 | 34920343 | 2.69 |
| chr19 | 34924807 | 34925907 | 1.68 |
| chr19 | 34971475 | 34973697 | 2.35 |
| chr19 | 34985226 | 34986252 | 1.68 |
| chr19 | 34992177 | 34992985 | 1.68 |
| chr19 | 34993673 | 34994756 | 1.35 |
| chr19 | 35002292 | 35003283 | 2.69 |
| chr19 | 35020108 | 35021258 | 2.69 |
| chr19 | 35040257 | 35041615 | 3.03 |
| chr19 | 35051845 | 35052925 | 2.35 |
| chr19 | 35059956 | 35062131 | 7.74 |
| chr19 | 35104036 | 35105011 | 4.04 |
| chr19 | 35105623 | 35106818 | 4.04 |
| chr19 | 35124730 | 35127842 | 6.05 |
| chr19 | 35135554 | 35136775 | 2.35 |
| chr19 | 35163112 | 35164265 | 3.03 |
| chr19 | 35169937 | 35173289 | 4.04 |

|       |          |          |       |
|-------|----------|----------|-------|
| chr19 | 35174764 | 35178813 | 6.05  |
| chr19 | 35181037 | 35182799 | 3.7   |
| chr19 | 35198081 | 35199499 | 3.03  |
| chr19 | 35203246 | 35205070 | 5.05  |
| chr19 | 35205878 | 35206917 | 2.35  |
| chr19 | 35210151 | 35211173 | 2.35  |
| chr19 | 35226616 | 35228062 | 3.03  |
| chr19 | 35233219 | 35235316 | 5.05  |
| chr19 | 35238060 | 35238910 | 3.36  |
| chr19 | 35239200 | 35240696 | 4.04  |
| chr19 | 35241928 | 35242791 | 3.7   |
| chr19 | 35243502 | 35245050 | 3.7   |
| chr19 | 35246629 | 35254262 | 11.77 |
| chr19 | 35261076 | 35263093 | 4.04  |
| chr19 | 35263627 | 35264956 | 2.35  |
| chr19 | 35290503 | 35291385 | 2.69  |
| chr19 | 35292008 | 35293482 | 3.36  |
| chr19 | 35293959 | 35295781 | 3.7   |
| chr19 | 35300896 | 35302358 | 2.69  |
| chr19 | 35304167 | 35305003 | 2.02  |
| chr19 | 35308185 | 35309004 | 2.69  |
| chr19 | 35312340 | 35313268 | 2.02  |
| chr19 | 35322359 | 35323212 | 2.35  |
| chr19 | 35325066 | 35325953 | 2.02  |
| chr19 | 35334493 | 35335294 | 2.69  |
| chr19 | 35337744 | 35339146 | 3.03  |
| chr19 | 35341405 | 35342309 | 2.02  |
| chr19 | 35358302 | 35359190 | 3.03  |
| chr19 | 35359625 | 35360555 | 2.35  |
| chr19 | 35372869 | 35373649 | 2.35  |
| chr19 | 35375653 | 35377282 | 3.36  |
| chr19 | 35379545 | 35380568 | 2.35  |
| chr19 | 35389654 | 35390967 | 2.35  |
| chr19 | 35393770 | 35395733 | 2.02  |
| chr19 | 35398366 | 35399259 | 2.35  |
| chr19 | 35406198 | 35407936 | 3.03  |
| chr19 | 35414731 | 35415595 | 2.35  |
| chr19 | 35417091 | 35418798 | 4.04  |
| chr19 | 35432903 | 35437615 | 6.05  |
| chr19 | 35437920 | 35440073 | 3.7   |
| chr19 | 35442928 | 35445169 | 4.71  |
| chr19 | 35446315 | 35451912 | 14.8  |
| chr19 | 35453317 | 35454143 | 2.69  |

|       |          |          |      |
|-------|----------|----------|------|
| chr19 | 35456995 | 35459833 | 5.72 |
| chr19 | 35463760 | 35464761 | 3.36 |
| chr19 | 35466927 | 35468563 | 7.4  |
| chr19 | 35484813 | 35487270 | 3.03 |
| chr19 | 35504462 | 35505679 | 1.68 |
| chr19 | 35511681 | 35512493 | 1.35 |
| chr19 | 35518103 | 35519065 | 2.02 |
| chr19 | 35522679 | 35524400 | 2.69 |
| chr19 | 35528711 | 35529717 | 1.35 |
| chr19 | 35530397 | 35531473 | 2.35 |
| chr19 | 35534048 | 35535229 | 2.02 |
| chr19 | 35539969 | 35541011 | 1.68 |
| chr19 | 35561193 | 35562296 | 2.35 |
| chr19 | 35564189 | 35565337 | 1.35 |
| chr19 | 35606934 | 35608594 | 2.35 |
| chr19 | 35617169 | 35618017 | 1.01 |
| chr19 | 35644478 | 35646743 | 1.68 |
| chr19 | 35652168 | 35653202 | 3.03 |
| chr19 | 35666543 | 35667671 | 1.01 |
| chr19 | 35672055 | 35672926 | 1.35 |
| chr19 | 35682272 | 35684291 | 2.02 |
| chr19 | 35688389 | 35690756 | 2.02 |
| chr19 | 35704480 | 35705476 | 2.02 |
| chr19 | 35707587 | 35708574 | 3.36 |
| chr19 | 35713567 | 35714558 | 1.68 |
| chr19 | 35715373 | 35716339 | 1.68 |
| chr19 | 35732254 | 35733835 | 2.35 |
| chr19 | 35738331 | 35740526 | 3.36 |
| chr19 | 35757277 | 35758109 | 1.35 |
| chr19 | 35768132 | 35768989 | 1.68 |
| chr19 | 35771813 | 35772706 | 2.02 |
| chr19 | 35802773 | 35803690 | 2.35 |
| chr19 | 35807229 | 35808176 | 1.01 |
| chr19 | 35811041 | 35811851 | 1.68 |
| chr19 | 35812986 | 35813785 | 2.02 |
| chr19 | 35819907 | 35820950 | 2.02 |
| chr19 | 35824637 | 35825502 | 1.35 |
| chr19 | 35826692 | 35827835 | 2.35 |
| chr19 | 35842683 | 35844116 | 2.35 |
| chr19 | 35848029 | 35849279 | 1.68 |
| chr19 | 35869119 | 35869917 | 2.02 |
| chr19 | 35875975 | 35878684 | 9.42 |
| chr19 | 35879599 | 35880940 | 2.35 |

|       |          |          |      |
|-------|----------|----------|------|
| chr19 | 35902097 | 35903320 | 2.02 |
| chr19 | 35914632 | 35917012 | 2.69 |
| chr19 | 35938690 | 35939879 | 1.68 |
| chr19 | 35962205 | 35963122 | 1.35 |
| chr19 | 35974893 | 35975747 | 1.68 |
| chr19 | 35980453 | 35981923 | 2.02 |
| chr19 | 35982485 | 35983850 | 2.02 |
| chr19 | 35984209 | 35985166 | 1.68 |
| chr19 | 35985832 | 35987101 | 3.03 |
| chr19 | 35991570 | 35992593 | 2.35 |
| chr19 | 36000822 | 36002177 | 3.36 |
| chr19 | 36030407 | 36031781 | 1.35 |
| chr19 | 36035025 | 36035956 | 2.35 |
| chr19 | 36036693 | 36038449 | 2.35 |
| chr19 | 36047825 | 36049293 | 2.02 |
| chr19 | 36055362 | 36056389 | 1.68 |
| chr19 | 36057537 | 36058397 | 1.01 |
| chr19 | 36059859 | 36060723 | 2.02 |
| chr19 | 36062211 | 36063171 | 1.01 |
| chr19 | 36078678 | 36080137 | 1.35 |
| chr19 | 36089327 | 36090234 | 1.68 |
| chr19 | 36122607 | 36124182 | 2.02 |
| chr19 | 36135903 | 36136821 | 1.68 |
| chr19 | 36138823 | 36139862 | 2.69 |
| chr19 | 36155927 | 36156818 | 1.35 |
| chr19 | 36193309 | 36194126 | 1.68 |
| chr19 | 36195059 | 36195973 | 1.35 |
| chr19 | 36203671 | 36205150 | 1.68 |
| chr19 | 36207577 | 36208835 | 4.37 |
| chr19 | 36221341 | 36222525 | 2.35 |
| chr19 | 36222988 | 36224574 | 1.35 |
| chr19 | 36227900 | 36228760 | 1.35 |
| chr19 | 36231168 | 36232455 | 2.02 |
| chr19 | 36247871 | 36249005 | 3.7  |
| chr19 | 36251591 | 36252314 | 1.35 |
| chr19 | 36256408 | 36257385 | 1.01 |
| chr19 | 36263573 | 36264592 | 2.02 |
| chr19 | 36273172 | 36274081 | 1.68 |
| chr19 | 36280121 | 36283022 | 2.02 |
| chr19 | 36283796 | 36284692 | 1.01 |
| chr19 | 36287592 | 36289500 | 1.35 |
| chr19 | 36323800 | 36324729 | 2.35 |
| chr19 | 36334889 | 36335734 | 2.02 |

|       |          |          |      |
|-------|----------|----------|------|
| chr19 | 36336236 | 36337358 | 2.69 |
| chr19 | 36339591 | 36340702 | 2.02 |
| chr19 | 36351529 | 36352495 | 1.68 |
| chr19 | 36356258 | 36357129 | 0.67 |
| chr19 | 36369211 | 36370409 | 1.68 |
| chr19 | 36388202 | 36389414 | 1.68 |
| chr19 | 36390770 | 36392579 | 2.35 |
| chr19 | 36409601 | 36410641 | 1.35 |
| chr19 | 36415594 | 36416879 | 2.35 |
| chr19 | 36439766 | 36440665 | 1.68 |
| chr19 | 36443814 | 36444815 | 1.01 |
| chr19 | 36448652 | 36450698 | 2.35 |
| chr19 | 36476827 | 36477582 | 3.03 |
| chr19 | 36485274 | 36487358 | 2.02 |
| chr19 | 36488225 | 36489013 | 1.35 |
| chr19 | 36493939 | 36494687 | 2.02 |
| chr19 | 36499210 | 36500929 | 2.35 |
| chr19 | 36503962 | 36504865 | 1.68 |
| chr19 | 36508413 | 36509405 | 1.35 |
| chr19 | 36522132 | 36523010 | 1.01 |
| chr19 | 36541856 | 36542662 | 3.03 |
| chr19 | 36545060 | 36546585 | 2.69 |
| chr19 | 36550914 | 36552269 | 3.36 |
| chr19 | 36563649 | 36564570 | 2.02 |
| chr19 | 36583853 | 36585183 | 1.35 |
| chr19 | 36601489 | 36602540 | 1.35 |
| chr19 | 36604612 | 36606262 | 2.69 |
| chr19 | 36611993 | 36612777 | 1.68 |
| chr19 | 36618347 | 36619710 | 4.37 |
| chr19 | 36631379 | 36632920 | 2.69 |
| chr19 | 36712440 | 36713934 | 4.37 |
| chr19 | 36714954 | 36722024 | 5.38 |
| chr19 | 36725118 | 36731143 | 7.74 |
| chr19 | 36732394 | 36733981 | 3.36 |
| chr19 | 36736383 | 36737941 | 4.04 |
| chr19 | 36756703 | 36757711 | 4.04 |
| chr19 | 36817762 | 36820101 | 3.7  |
| chr19 | 36820744 | 36823310 | 5.05 |
| chr19 | 36827295 | 36829199 | 4.37 |
| chr19 | 36829842 | 36832921 | 6.05 |
| chr19 | 36835216 | 36836917 | 3.7  |
| chr19 | 36859879 | 36861771 | 5.05 |
| chr19 | 36869209 | 36870625 | 3.03 |



|       |          |          |       |
|-------|----------|----------|-------|
| chr19 | 36880656 | 36881585 | 4.04  |
| chr19 | 36882764 | 36886877 | 6.05  |
| chr19 | 36888274 | 36889128 | 4.37  |
| chr19 | 36907889 | 36909332 | 4.04  |
| chr19 | 36911133 | 36912722 | 4.37  |
| chr19 | 36913934 | 36914856 | 3.36  |
| chr19 | 36930135 | 36931227 | 4.71  |
| chr19 | 36938053 | 36942697 | 8.75  |
| chr19 | 36948921 | 36949594 | 4.04  |
| chr19 | 36951350 | 36952489 | 4.04  |
| chr19 | 36956409 | 36957461 | 4.37  |
| chr19 | 36968995 | 36970914 | 4.37  |
| chr19 | 36979436 | 36980812 | 5.05  |
| chr19 | 36987396 | 36988945 | 4.37  |
| chr19 | 36992137 | 36994681 | 3.7   |
| chr19 | 36999007 | 37000656 | 5.72  |
| chr19 | 37000910 | 37008061 | 9.75  |
| chr19 | 37008957 | 37010798 | 5.05  |
| chr19 | 37025486 | 37026363 | 3.36  |
| chr19 | 37026778 | 37027917 | 3.36  |
| chr19 | 37030233 | 37031022 | 3.36  |
| chr19 | 37033391 | 37034911 | 5.38  |
| chr19 | 37036738 | 37042471 | 13.45 |
| chr19 | 37046361 | 37050413 | 5.05  |
| chr19 | 37051002 | 37051979 | 3.36  |
| chr19 | 37054696 | 37057291 | 4.71  |
| chr19 | 37076076 | 37077082 | 3.03  |
| chr19 | 37083340 | 37084964 | 3.36  |
| chr19 | 37093884 | 37096021 | 4.04  |
| chr19 | 37097941 | 37099380 | 4.37  |
| chr19 | 37100374 | 37101291 | 3.36  |
| chr19 | 37107152 | 37108143 | 5.05  |
| chr19 | 37109157 | 37110801 | 4.37  |
| chr19 | 37113075 | 37114693 | 4.37  |
| chr19 | 37116906 | 37120019 | 5.05  |
| chr19 | 37122464 | 37126630 | 4.37  |
| chr19 | 37128274 | 37133696 | 10.09 |
| chr19 | 37134017 | 37134861 | 4.04  |
| chr19 | 37142048 | 37146901 | 5.05  |
| chr19 | 37157160 | 37158381 | 4.04  |
| chr19 | 37170845 | 37171897 | 4.04  |
| chr19 | 37187449 | 37188605 | 3.7   |
| chr19 | 37195174 | 37204455 | 6.05  |

|       |          |          |       |
|-------|----------|----------|-------|
| chr19 | 37206345 | 37207790 | 5.05  |
| chr19 | 37209288 | 37212953 | 14.46 |
| chr19 | 37213790 | 37214640 | 3.03  |
| chr19 | 37216515 | 37218014 | 3.7   |
| chr19 | 37221838 | 37224557 | 4.04  |
| chr19 | 37231168 | 37232592 | 4.71  |
| chr19 | 37236158 | 37237095 | 3.7   |
| chr19 | 37237938 | 37245127 | 9.42  |
| chr19 | 37245720 | 37248649 | 5.05  |
| chr19 | 37250375 | 37251184 | 3.7   |
| chr19 | 37263525 | 37264519 | 2.69  |
| chr19 | 37267036 | 37268043 | 4.04  |
| chr19 | 37277058 | 37278425 | 3.7   |
| chr19 | 37295442 | 37297963 | 4.71  |
| chr19 | 37300434 | 37308307 | 5.05  |
| chr19 | 37308700 | 37312483 | 9.42  |
| chr19 | 37313676 | 37317967 | 4.71  |
| chr19 | 37322006 | 37323453 | 3.36  |
| chr19 | 37328602 | 37329830 | 4.04  |
| chr19 | 37332669 | 37333812 | 4.37  |
| chr19 | 37334655 | 37335843 | 5.38  |
| chr19 | 37338871 | 37342587 | 4.37  |
| chr19 | 37343418 | 37345429 | 5.05  |
| chr19 | 37353486 | 37359144 | 5.38  |
| chr19 | 37359953 | 37372843 | 10.76 |
| chr19 | 37373731 | 37375119 | 4.04  |
| chr19 | 37376083 | 37376948 | 3.03  |
| chr19 | 37377963 | 37379157 | 3.7   |
| chr19 | 37379695 | 37381230 | 5.05  |
| chr19 | 37381458 | 37386908 | 11.1  |
| chr19 | 37387192 | 37390523 | 4.37  |
| chr19 | 37402464 | 37403397 | 3.03  |
| chr19 | 37403689 | 37404791 | 4.04  |
| chr19 | 37407038 | 37408025 | 3.36  |
| chr19 | 37430943 | 37432329 | 4.04  |
| chr19 | 37440080 | 37442668 | 6.39  |
| chr19 | 37446365 | 37447275 | 3.36  |
| chr19 | 37448224 | 37449064 | 3.7   |
| chr19 | 37483616 | 37484938 | 4.04  |
| chr19 | 37485706 | 37488648 | 5.38  |
| chr19 | 37498128 | 37503217 | 4.37  |
| chr19 | 37506269 | 37507546 | 4.71  |
| chr19 | 37508403 | 37509699 | 4.37  |

|       |          |          |       |
|-------|----------|----------|-------|
| chr19 | 37547287 | 37548341 | 2.35  |
| chr19 | 37549643 | 37550586 | 3.36  |
| chr19 | 37568570 | 37570090 | 4.71  |
| chr19 | 37578706 | 37579750 | 4.04  |
| chr19 | 37586077 | 37587970 | 4.04  |
| chr19 | 37592991 | 37594277 | 3.36  |
| chr19 | 37601453 | 37602267 | 4.37  |
| chr19 | 37613308 | 37629129 | 13.12 |
| chr19 | 37630571 | 37632341 | 4.37  |
| chr19 | 37635348 | 37636156 | 3.7   |
| chr19 | 37639814 | 37642369 | 4.37  |
| chr19 | 37643008 | 37647300 | 6.39  |
| chr19 | 37647835 | 37648901 | 3.36  |
| chr19 | 37650134 | 37652389 | 4.37  |
| chr19 | 37658700 | 37660325 | 4.37  |
| chr19 | 37671800 | 37674558 | 4.04  |
| chr19 | 37676630 | 37679284 | 5.38  |
| chr19 | 37691917 | 37693094 | 4.04  |
| chr19 | 37708476 | 37709489 | 3.7   |
| chr19 | 37716887 | 37717909 | 3.36  |
| chr19 | 37720767 | 37721697 | 2.69  |
| chr19 | 37722943 | 37724079 | 4.71  |
| chr19 | 37729030 | 37729996 | 3.36  |
| chr19 | 37730859 | 37732563 | 4.04  |
| chr19 | 37732862 | 37735450 | 8.75  |
| chr19 | 37737538 | 37738460 | 3.36  |
| chr19 | 37741633 | 37743705 | 5.38  |
| chr19 | 37746330 | 37748035 | 4.04  |
| chr19 | 37748640 | 37749710 | 4.04  |
| chr19 | 37783840 | 37785530 | 9.08  |
| chr19 | 37796078 | 37798529 | 3.7   |
| chr19 | 37852870 | 37857565 | 5.05  |
| chr19 | 37861453 | 37862392 | 3.03  |
| chr19 | 37870955 | 37871763 | 3.7   |
| chr19 | 37874825 | 37876735 | 3.7   |
| chr19 | 37877295 | 37882405 | 7.74  |
| chr19 | 37888936 | 37890169 | 4.37  |
| chr19 | 37895297 | 37896814 | 4.71  |
| chr19 | 37901357 | 37906048 | 10.09 |
| chr19 | 37906766 | 37908951 | 4.71  |
| chr19 | 37911149 | 37912589 | 3.36  |
| chr19 | 37917742 | 37919297 | 4.71  |
| chr19 | 37938443 | 37939303 | 3.7   |

|       |          |          |       |
|-------|----------|----------|-------|
| chr19 | 37942311 | 37944678 | 9.42  |
| chr19 | 37945376 | 37947249 | 3.7   |
| chr19 | 37957233 | 37959054 | 4.71  |
| chr19 | 37963525 | 37964424 | 3.7   |
| chr19 | 37965967 | 37967249 | 3.36  |
| chr19 | 37968473 | 37970102 | 3.36  |
| chr19 | 37973926 | 37977752 | 10.09 |
| chr19 | 37978125 | 37979622 | 4.71  |
| chr19 | 37981361 | 37982192 | 4.37  |
| chr19 | 37987338 | 37988127 | 3.36  |
| chr19 | 37994418 | 37995593 | 3.7   |
| chr19 | 37996395 | 37998519 | 4.37  |
| chr19 | 38010493 | 38011832 | 3.7   |
| chr19 | 38019065 | 38020479 | 4.71  |
| chr19 | 38023183 | 38025766 | 4.71  |
| chr19 | 38027193 | 38030588 | 8.75  |
| chr19 | 38033656 | 38034946 | 5.05  |
| chr19 | 38037356 | 38043776 | 4.71  |
| chr19 | 38044202 | 38045073 | 3.36  |
| chr19 | 38049060 | 38050533 | 4.04  |
| chr19 | 38051289 | 38058341 | 12.78 |
| chr19 | 38058597 | 38060088 | 3.36  |
| chr19 | 38063026 | 38064100 | 3.7   |
| chr19 | 38064758 | 38070824 | 4.37  |
| chr19 | 38072972 | 38075280 | 4.37  |
| chr19 | 38077185 | 38079380 | 5.05  |
| chr19 | 38084603 | 38086289 | 4.04  |
| chr19 | 38090149 | 38090959 | 4.71  |
| chr19 | 38092423 | 38093743 | 4.71  |
| chr19 | 38097736 | 38099950 | 4.04  |
| chr19 | 38102122 | 38105128 | 5.72  |
| chr19 | 38106643 | 38107507 | 3.03  |
| chr19 | 38112569 | 38113631 | 3.7   |
| chr19 | 38117621 | 38118421 | 4.37  |
| chr19 | 38121646 | 38123146 | 3.7   |
| chr19 | 38124213 | 38129592 | 6.73  |
| chr19 | 38130029 | 38132985 | 4.37  |
| chr19 | 38136814 | 38139427 | 4.71  |
| chr19 | 38145703 | 38147619 | 6.05  |
| chr19 | 38151136 | 38152017 | 5.72  |
| chr19 | 38153787 | 38155178 | 4.37  |
| chr19 | 38156092 | 38162482 | 11.77 |
| chr19 | 38163250 | 38165415 | 4.04  |

|       |          |          |      |
|-------|----------|----------|------|
| chr19 | 38168324 | 38171072 | 4.71 |
| chr19 | 38176032 | 38177556 | 4.37 |
| chr19 | 38182066 | 38183462 | 4.04 |
| chr19 | 38188092 | 38192308 | 6.05 |
| chr19 | 38198458 | 38199241 | 4.37 |
| chr19 | 38199657 | 38200793 | 4.04 |
| chr19 | 38201389 | 38204196 | 4.04 |
| chr19 | 38210144 | 38211071 | 4.04 |
| chr19 | 38214204 | 38215479 | 4.04 |
| chr19 | 38215706 | 38216563 | 4.04 |
| chr19 | 38226041 | 38232550 | 7.74 |
| chr19 | 38239575 | 38240479 | 3.7  |
| chr19 | 38280321 | 38283524 | 4.37 |
| chr19 | 38285171 | 38286393 | 3.03 |
| chr19 | 38291567 | 38296195 | 7.74 |
| chr19 | 38296851 | 38298517 | 3.36 |
| chr19 | 38299684 | 38302058 | 4.04 |
| chr19 | 38304293 | 38305371 | 3.36 |
| chr19 | 38307275 | 38309670 | 4.71 |
| chr19 | 38311283 | 38313430 | 5.05 |
| chr19 | 38314685 | 38316094 | 3.7  |
| chr19 | 38324034 | 38325650 | 4.71 |
| chr19 | 38360400 | 38361362 | 2.69 |
| chr19 | 38375454 | 38378159 | 4.37 |
| chr19 | 38389978 | 38390883 | 2.02 |
| chr19 | 38397172 | 38398277 | 4.71 |
| chr19 | 38420919 | 38421859 | 2.69 |
| chr19 | 38431869 | 38433272 | 3.7  |
| chr19 | 38460001 | 38461219 | 3.03 |
| chr19 | 38503332 | 38504228 | 2.02 |
| chr19 | 38559115 | 38559914 | 1.01 |
| chr19 | 38578428 | 38579765 | 2.35 |
| chr19 | 38605311 | 38606175 | 2.02 |
| chr19 | 38609660 | 38610576 | 0.67 |
| chr19 | 38655130 | 38656098 | 1.68 |
| chr19 | 38665665 | 38666578 | 2.02 |
| chr19 | 38671337 | 38672102 | 1.68 |
| chr19 | 38691575 | 38692558 | 1.35 |
| chr19 | 38696220 | 38697036 | 1.68 |
| chr19 | 38707342 | 38708141 | 2.02 |
| chr19 | 38714358 | 38715396 | 3.36 |
| chr19 | 38754422 | 38755913 | 2.35 |
| chr19 | 38757737 | 38759306 | 3.03 |

|       |          |          |      |
|-------|----------|----------|------|
| chr19 | 38760678 | 38761662 | 2.02 |
| chr19 | 38767782 | 38770207 | 5.05 |
| chr19 | 38780483 | 38781923 | 4.04 |
| chr19 | 38783355 | 38784500 | 2.35 |
| chr19 | 38788880 | 38790455 | 4.04 |
| chr19 | 38792843 | 38793667 | 1.35 |
| chr19 | 38805688 | 38807044 | 3.03 |
| chr19 | 38810009 | 38811344 | 2.69 |
| chr19 | 38817028 | 38817995 | 1.35 |
| chr19 | 38849892 | 38850736 | 2.02 |
| chr19 | 38857592 | 38859105 | 2.69 |
| chr19 | 38864932 | 38866105 | 2.69 |
| chr19 | 38879833 | 38880716 | 0.67 |
| chr19 | 38881039 | 38881765 | 1.01 |
| chr19 | 38934402 | 38935234 | 1.68 |
| chr19 | 38976288 | 38977043 | 1.01 |
| chr19 | 38980841 | 38981684 | 1.68 |
| chr19 | 38994925 | 38996514 | 2.02 |
| chr19 | 39016140 | 39017051 | 0.67 |
| chr19 | 39025437 | 39026286 | 4.71 |
| chr19 | 39057273 | 39058433 | 1.01 |
| chr19 | 39109169 | 39110373 | 2.35 |
| chr19 | 39130883 | 39131574 | 1.68 |
| chr19 | 39137714 | 39139449 | 3.03 |
| chr19 | 39148882 | 39149810 | 4.04 |
| chr19 | 39173256 | 39174182 | 3.36 |
| chr19 | 39182618 | 39184364 | 2.02 |
| chr19 | 39188680 | 39189720 | 1.35 |
| chr19 | 39214766 | 39215660 | 1.35 |
| chr19 | 39264871 | 39265752 | 1.68 |
| chr19 | 39269066 | 39269916 | 2.02 |
| chr19 | 39277177 | 39278262 | 1.68 |
| chr19 | 39306676 | 39308306 | 1.35 |
| chr19 | 39317854 | 39318943 | 2.35 |
| chr19 | 39336550 | 39337280 | 1.01 |
| chr19 | 39339928 | 39340755 | 3.03 |
| chr19 | 39341630 | 39343095 | 2.35 |
| chr19 | 39409814 | 39410750 | 3.03 |
| chr19 | 39420598 | 39421430 | 3.03 |
| chr19 | 39425874 | 39426776 | 3.36 |
| chr19 | 39437086 | 39438647 | 2.02 |
| chr19 | 39466541 | 39467762 | 2.69 |
| chr19 | 39470277 | 39472088 | 6.39 |

|       |          |          |      |
|-------|----------|----------|------|
| chr19 | 39510449 | 39511396 | 1.35 |
| chr19 | 39521274 | 39522566 | 2.35 |
| chr19 | 39612587 | 39614129 | 3.03 |
| chr19 | 39616966 | 39617893 | 2.02 |
| chr19 | 39656951 | 39657812 | 2.35 |
| chr19 | 39662098 | 39662838 | 1.68 |
| chr19 | 39689033 | 39689929 | 1.68 |
| chr19 | 39719760 | 39720546 | 2.02 |
| chr19 | 39750498 | 39751509 | 2.35 |
| chr19 | 39811962 | 39812978 | 2.02 |
| chr19 | 39832014 | 39833471 | 6.05 |
| chr19 | 39839948 | 39840702 | 2.02 |
| chr19 | 39846137 | 39847109 | 2.35 |
| chr19 | 39867872 | 39868732 | 2.69 |
| chr19 | 39870554 | 39871916 | 1.68 |
| chr19 | 39891417 | 39892395 | 2.69 |
| chr19 | 39892722 | 39893693 | 3.36 |
| chr19 | 39893928 | 39895016 | 3.03 |
| chr19 | 39896852 | 39898718 | 4.71 |
| chr19 | 39902876 | 39905173 | 3.7  |
| chr19 | 39906794 | 39908106 | 1.35 |
| chr19 | 39925997 | 39926886 | 2.35 |
| chr19 | 39935444 | 39936431 | 2.02 |
| chr19 | 39964490 | 39965809 | 2.02 |
| chr19 | 39976808 | 39978218 | 1.68 |
| chr19 | 39982354 | 39983031 | 1.68 |
| chr19 | 39994966 | 39996150 | 1.35 |
| chr19 | 40004953 | 40007020 | 2.35 |
| chr19 | 40011094 | 40011952 | 1.35 |
| chr19 | 40022886 | 40023652 | 1.68 |
| chr19 | 40030489 | 40031598 | 3.03 |
| chr19 | 40045637 | 40046591 | 1.68 |
| chr19 | 40057236 | 40058107 | 2.35 |
| chr19 | 40059060 | 40060561 | 2.02 |
| chr19 | 40086651 | 40087540 | 1.35 |
| chr19 | 40149418 | 40150267 | 1.68 |
| chr19 | 40201056 | 40201801 | 1.35 |
| chr19 | 40259288 | 40260181 | 1.68 |
| chr19 | 40266714 | 40267437 | 2.69 |
| chr19 | 40278418 | 40279440 | 1.35 |
| chr19 | 40283310 | 40284126 | 2.35 |
| chr19 | 40298672 | 40299667 | 1.68 |
| chr19 | 40335715 | 40336660 | 2.02 |

|       |          |          |       |
|-------|----------|----------|-------|
| chr19 | 40489516 | 40490397 | 3.36  |
| chr19 | 40490854 | 40493508 | 4.04  |
| chr19 | 40497760 | 40498651 | 1.68  |
| chr19 | 40498898 | 40499825 | 4.04  |
| chr19 | 40502478 | 40503713 | 2.69  |
| chr19 | 40518845 | 40522187 | 6.05  |
| chr19 | 40522481 | 40523431 | 3.36  |
| chr19 | 40526614 | 40528139 | 3.36  |
| chr19 | 40529680 | 40534556 | 6.73  |
| chr19 | 40534915 | 40536622 | 3.7   |
| chr19 | 40537383 | 40538221 | 3.7   |
| chr19 | 40538576 | 40543998 | 10.09 |
| chr19 | 40549894 | 40551504 | 4.37  |
| chr19 | 40553431 | 40555619 | 3.36  |
| chr19 | 40561395 | 40562435 | 3.36  |
| chr19 | 40574222 | 40575687 | 3.7   |
| chr19 | 40578505 | 40582745 | 4.71  |
| chr19 | 40583681 | 40585187 | 3.7   |
| chr19 | 40591998 | 40593028 | 2.02  |
| chr19 | 40601464 | 40602483 | 3.36  |
| chr19 | 40646962 | 40647701 | 1.35  |
| chr19 | 40671004 | 40672091 | 1.68  |
| chr19 | 40682882 | 40684020 | 6.39  |
| chr19 | 40696528 | 40697619 | 1.68  |
| chr19 | 40709846 | 40711083 | 2.02  |
| chr19 | 40762342 | 40763313 | 2.02  |
| chr19 | 40777289 | 40778573 | 1.35  |
| chr19 | 40780883 | 40781619 | 2.35  |
| chr19 | 40790752 | 40791611 | 2.69  |
| chr19 | 40792248 | 40793172 | 1.35  |
| chr19 | 40799942 | 40800898 | 2.02  |
| chr19 | 40874864 | 40875816 | 1.35  |
| chr19 | 40886193 | 40887209 | 1.68  |
| chr19 | 40901582 | 40903790 | 2.02  |
| chr19 | 40909345 | 40910497 | 2.02  |
| chr19 | 40913565 | 40914420 | 1.68  |
| chr19 | 40930782 | 40932085 | 2.35  |
| chr19 | 40953415 | 40954293 | 1.01  |
| chr19 | 40993221 | 40994329 | 2.35  |
| chr19 | 41039862 | 41041588 | 2.02  |
| chr19 | 41073523 | 41074411 | 1.35  |
| chr19 | 41077400 | 41078377 | 2.02  |
| chr19 | 41082507 | 41083492 | 3.36  |



|       |          |          |      |
|-------|----------|----------|------|
| chr19 | 41092576 | 41093301 | 1.68 |
| chr19 | 41102980 | 41104845 | 2.69 |
| chr19 | 41105792 | 41107202 | 2.69 |
| chr19 | 41108959 | 41109679 | 3.03 |
| chr19 | 41129209 | 41130302 | 1.68 |
| chr19 | 41131979 | 41132820 | 2.35 |
| chr19 | 41139900 | 41141046 | 2.02 |
| chr19 | 41163637 | 41164431 | 1.01 |
| chr19 | 41167193 | 41168288 | 1.35 |
| chr19 | 41168609 | 41171067 | 2.35 |
| chr19 | 41173303 | 41174733 | 1.68 |
| chr19 | 41196050 | 41196991 | 2.02 |
| chr19 | 41198883 | 41200812 | 2.02 |
| chr19 | 41205773 | 41206731 | 1.68 |
| chr19 | 41209230 | 41210365 | 2.02 |
| chr19 | 41221499 | 41222314 | 3.03 |
| chr19 | 41224530 | 41225263 | 2.35 |
| chr19 | 41238887 | 41240072 | 1.68 |
| chr19 | 41247275 | 41248483 | 2.35 |
| chr19 | 41256532 | 41257418 | 3.03 |
| chr19 | 41302170 | 41303089 | 1.35 |
| chr19 | 41309356 | 41310341 | 1.68 |
| chr19 | 41335653 | 41336907 | 2.69 |
| chr19 | 41413221 | 41414609 | 1.68 |
| chr19 | 41417728 | 41418986 | 1.68 |
| chr19 | 41424655 | 41427310 | 5.72 |
| chr19 | 41432291 | 41433369 | 2.35 |
| chr19 | 41459849 | 41461450 | 6.05 |
| chr19 | 41536473 | 41537224 | 2.35 |
| chr19 | 41815542 | 41816926 | 6.73 |
| chr19 | 41859424 | 41860382 | 3.03 |
| chr19 | 42059649 | 42061099 | 4.37 |
| chr19 | 42069301 | 42071664 | 1.68 |
| chr19 | 42088576 | 42089450 | 3.36 |
| chr19 | 42090572 | 42091405 | 2.69 |
| chr19 | 42133825 | 42135106 | 2.02 |
| chr19 | 42168935 | 42171956 | 6.05 |
| chr19 | 42174415 | 42175287 | 2.02 |
| chr19 | 42186613 | 42187427 | 2.35 |
| chr19 | 42259789 | 42260606 | 2.35 |
| chr19 | 42265712 | 42266808 | 2.35 |
| chr19 | 42283427 | 42284423 | 4.04 |
| chr19 | 42333164 | 42333989 | 2.35 |

|       |          |          |       |
|-------|----------|----------|-------|
| chr19 | 42363003 | 42363796 | 1.68  |
| chr19 | 42376373 | 42377223 | 1.68  |
| chr19 | 42387592 | 42388916 | 4.71  |
| chr19 | 42401952 | 42402749 | 1.35  |
| chr19 | 42415276 | 42416757 | 1.35  |
| chr19 | 42431221 | 42432743 | 2.69  |
| chr19 | 42556620 | 42558091 | 2.35  |
| chr19 | 42567163 | 42568414 | 1.68  |
| chr19 | 42605074 | 42606011 | 1.35  |
| chr19 | 42743522 | 42744441 | 1.35  |
| chr19 | 42750243 | 42751513 | 4.71  |
| chr19 | 42757252 | 42759552 | 4.04  |
| chr19 | 42776245 | 42777214 | 1.35  |
| chr19 | 42806129 | 42807474 | 5.38  |
| chr19 | 42825918 | 42826729 | 2.02  |
| chr19 | 42855238 | 42856097 | 2.02  |
| chr19 | 42860989 | 42861964 | 1.01  |
| chr19 | 42885592 | 42886465 | 1.68  |
| chr19 | 42904455 | 42905486 | 2.35  |
| chr19 | 42914565 | 42915305 | 1.35  |
| chr19 | 43163359 | 43164963 | 2.02  |
| chr19 | 43189615 | 43191085 | 3.36  |
| chr19 | 43296487 | 43298136 | 4.71  |
| chr19 | 43607196 | 43608723 | 7.06  |
| chr19 | 43628312 | 43629086 | 1.35  |
| chr19 | 43731859 | 43734101 | 10.09 |
| chr19 | 43793904 | 43795860 | 9.75  |
| chr19 | 43804078 | 43805711 | 2.02  |
| chr19 | 43812756 | 43813581 | 2.69  |
| chr19 | 43819776 | 43821180 | 2.35  |
| chr19 | 43833455 | 43834270 | 2.02  |
| chr19 | 43836062 | 43837601 | 2.02  |
| chr19 | 43839506 | 43840417 | 1.35  |
| chr19 | 43851013 | 43852208 | 1.68  |
| chr19 | 43865807 | 43866807 | 1.68  |
| chr19 | 43919008 | 43919757 | 1.35  |
| chr19 | 43936895 | 43937745 | 1.68  |
| chr19 | 43945589 | 43946689 | 1.68  |
| chr19 | 43956421 | 43957300 | 2.35  |
| chr19 | 43976382 | 43977424 | 1.01  |
| chr19 | 43980551 | 43981613 | 1.35  |
| chr19 | 43985969 | 43986694 | 1.68  |
| chr19 | 44008496 | 44009268 | 1.68  |

|       |          |          |      |
|-------|----------|----------|------|
| chr19 | 44030020 | 44031891 | 2.69 |
| chr19 | 44069146 | 44070301 | 2.02 |
| chr19 | 44100178 | 44100984 | 2.69 |
| chr19 | 44109455 | 44110335 | 1.35 |
| chr19 | 44121199 | 44122225 | 1.68 |
| chr19 | 44135626 | 44136479 | 1.68 |
| chr19 | 44140047 | 44140734 | 1.35 |
| chr19 | 44155654 | 44156457 | 2.69 |
| chr19 | 44174058 | 44175580 | 2.02 |
| chr19 | 44194373 | 44196923 | 7.74 |
| chr19 | 44199910 | 44200895 | 2.02 |
| chr19 | 44212306 | 44213689 | 4.37 |
| chr19 | 44230799 | 44232003 | 1.68 |
| chr19 | 44252871 | 44253930 | 2.02 |
| chr19 | 44260250 | 44261103 | 2.35 |
| chr19 | 44277274 | 44279057 | 2.69 |
| chr19 | 44284773 | 44285822 | 2.35 |
| chr19 | 44317794 | 44319097 | 2.02 |
| chr19 | 44324717 | 44325906 | 2.35 |
| chr19 | 44341503 | 44344924 | 5.05 |
| chr19 | 44345899 | 44347347 | 4.37 |
| chr19 | 44347914 | 44355511 | 8.07 |
| chr19 | 44355797 | 44356805 | 3.7  |
| chr19 | 44358046 | 44358950 | 3.36 |
| chr19 | 44364463 | 44366703 | 5.05 |
| chr19 | 44371962 | 44373385 | 4.04 |
| chr19 | 44373688 | 44379193 | 7.4  |
| chr19 | 44379536 | 44380627 | 3.7  |
| chr19 | 44382588 | 44384208 | 5.38 |
| chr19 | 44386036 | 44386960 | 4.04 |
| chr19 | 44388058 | 44389227 | 4.71 |
| chr19 | 44392903 | 44394366 | 3.36 |
| chr19 | 44406342 | 44407091 | 3.03 |
| chr19 | 44412210 | 44413324 | 3.36 |
| chr19 | 44414985 | 44419190 | 7.06 |
| chr19 | 44421560 | 44422603 | 4.37 |
| chr19 | 44440379 | 44441215 | 2.69 |
| chr19 | 44458853 | 44459877 | 4.37 |
| chr19 | 44463242 | 44464387 | 3.7  |
| chr19 | 44469126 | 44471603 | 4.37 |
| chr19 | 44506684 | 44507574 | 3.36 |
| chr19 | 44512661 | 44517108 | 8.07 |
| chr19 | 44518437 | 44519608 | 3.7  |

|       |          |          |      |
|-------|----------|----------|------|
| chr19 | 44533669 | 44534428 | 3.7  |
| chr19 | 44534993 | 44537101 | 5.05 |
| chr19 | 44544607 | 44546329 | 2.69 |
| chr19 | 44555479 | 44556486 | 3.36 |
| chr19 | 44558701 | 44559543 | 2.35 |
| chr19 | 44566804 | 44568531 | 3.7  |
| chr19 | 44569761 | 44572336 | 8.75 |
| chr19 | 44610299 | 44613426 | 6.39 |
| chr19 | 44635200 | 44636465 | 4.71 |
| chr19 | 44644689 | 44646600 | 3.03 |
| chr19 | 44659747 | 44662411 | 7.4  |
| chr19 | 44664024 | 44664958 | 2.35 |
| chr19 | 44667686 | 44669506 | 3.03 |
| chr19 | 44675919 | 44682620 | 5.38 |
| chr19 | 44684206 | 44685533 | 2.35 |
| chr19 | 44685812 | 44688236 | 2.35 |
| chr19 | 44689095 | 44691245 | 2.02 |
| chr19 | 44694680 | 44697120 | 3.03 |
| chr19 | 44697391 | 44698389 | 2.35 |
| chr19 | 44698948 | 44700088 | 2.69 |
| chr19 | 44702070 | 44703079 | 2.35 |
| chr19 | 44705028 | 44705879 | 1.68 |
| chr19 | 44709593 | 44710454 | 3.03 |
| chr19 | 44711717 | 44713238 | 2.69 |
| chr19 | 44714253 | 44717237 | 4.37 |
| chr19 | 44732214 | 44732985 | 2.69 |
| chr19 | 44739314 | 44741507 | 3.7  |
| chr19 | 44745052 | 44746956 | 3.36 |
| chr19 | 44748666 | 44749467 | 3.7  |
| chr19 | 44757955 | 44761015 | 3.36 |
| chr19 | 44764396 | 44765498 | 2.02 |
| chr19 | 44765987 | 44766891 | 1.35 |
| chr19 | 44770455 | 44771745 | 2.69 |
| chr19 | 44777582 | 44779693 | 4.71 |
| chr19 | 44793573 | 44794472 | 3.36 |
| chr19 | 44834461 | 44837896 | 5.38 |
| chr19 | 44838436 | 44840624 | 5.05 |
| chr19 | 44915137 | 44916104 | 4.71 |
| chr19 | 44931577 | 44934566 | 4.71 |
| chr19 | 44935553 | 44936462 | 3.36 |
| chr19 | 44937026 | 44937942 | 4.37 |
| chr19 | 44938567 | 44940007 | 3.7  |
| chr19 | 44942176 | 44943214 | 3.7  |

|       |          |          |      |
|-------|----------|----------|------|
| chr19 | 44947814 | 44949339 | 3.36 |
| chr19 | 44963463 | 44964450 | 5.38 |
| chr19 | 44977250 | 44985243 | 25.9 |
| chr19 | 44986732 | 44987862 | 3.36 |
| chr19 | 44988358 | 44992131 | 4.04 |
| chr19 | 44993963 | 44995684 | 4.04 |
| chr19 | 44996010 | 44998359 | 4.37 |
| chr19 | 45000449 | 45001489 | 4.37 |
| chr19 | 45217854 | 45219408 | 3.7  |
| chr19 | 45244492 | 45245592 | 3.7  |
| chr19 | 45251530 | 45252516 | 4.04 |
| chr19 | 45625524 | 45627330 | 6.05 |
| chr19 | 45681848 | 45683154 | 2.35 |
| chr19 | 45734803 | 45735579 | 2.02 |
| chr19 | 45907380 | 45908940 | 3.7  |
| chr19 | 45926617 | 45927748 | 4.04 |
| chr19 | 45999582 | 46000675 | 2.02 |
| chr19 | 46017685 | 46018668 | 3.03 |
| chr19 | 46051083 | 46052267 | 2.69 |
| chr19 | 46080267 | 46081126 | 4.37 |
| chr19 | 46101140 | 46102474 | 2.35 |
| chr19 | 46270596 | 46272900 | 4.37 |
| chr19 | 46368160 | 46368960 | 2.35 |
| chr19 | 46476832 | 46477535 | 2.02 |
| chr19 | 46561946 | 46564188 | 7.74 |
| chr19 | 46583332 | 46584387 | 2.69 |
| chr19 | 46665103 | 46666182 | 4.04 |
| chr19 | 46724350 | 46725500 | 2.02 |
| chr19 | 46727134 | 46727780 | 1.01 |
| chr19 | 46829386 | 46830144 | 3.36 |
| chr19 | 46876362 | 46877639 | 4.37 |
| chr19 | 46916441 | 46917468 | 1.68 |
| chr19 | 47287210 | 47288401 | 4.71 |
| chr19 | 47291276 | 47292104 | 2.69 |
| chr19 | 47401552 | 47402420 | 1.35 |
| chr19 | 47606021 | 47606723 | 1.01 |
| chr19 | 47655092 | 47656458 | 4.04 |
| chr19 | 47734086 | 47734961 | 3.7  |
| chr19 | 47852093 | 47852955 | 3.7  |
| chr19 | 48088878 | 48089627 | 3.36 |
| chr19 | 48111147 | 48111995 | 2.69 |
| chr19 | 48231958 | 48233243 | 4.37 |
| chr19 | 48564535 | 48565647 | 3.7  |

|       |          |          |       |
|-------|----------|----------|-------|
| chr19 | 48788876 | 48790307 | 3.36  |
| chr19 | 48993771 | 48994619 | 3.03  |
| chr19 | 49029652 | 49031103 | 4.37  |
| chr19 | 49178532 | 49179534 | 2.35  |
| chr19 | 49251627 | 49252376 | 2.35  |
| chr19 | 49255797 | 49256944 | 4.04  |
| chr19 | 49449929 | 49451112 | 4.71  |
| chr19 | 49628031 | 49629210 | 5.05  |
| chr19 | 49871605 | 49872979 | 4.04  |
| chr19 | 50213349 | 50214355 | 3.36  |
| chr19 | 50370017 | 50371341 | 2.02  |
| chr19 | 50386054 | 50387220 | 5.05  |
| chr19 | 50489960 | 50491130 | 4.71  |
| chr19 | 50546859 | 50552350 | 7.74  |
| chr19 | 50560469 | 50564015 | 13.12 |
| chr19 | 50564745 | 50566063 | 4.71  |
| chr19 | 50602081 | 50602862 | 3.7   |
| chr19 | 50638742 | 50640467 | 4.71  |
| chr19 | 50758665 | 50759461 | 2.02  |
| chr19 | 50847547 | 50849252 | 8.07  |
| chr19 | 50879204 | 50880190 | 3.36  |
| chr19 | 50956053 | 50956889 | 1.35  |
| chr19 | 50989322 | 50990963 | 3.03  |
| chr19 | 51015254 | 51016106 | 1.68  |
| chr19 | 51190481 | 51191566 | 1.35  |
| chr19 | 51324814 | 51325728 | 2.35  |
| chr19 | 51582291 | 51583444 | 1.68  |
| chr19 | 51595993 | 51596904 | 3.36  |
| chr19 | 51637768 | 51638740 | 4.04  |
| chr19 | 51904833 | 51906226 | 6.05  |
| chr19 | 52089723 | 52091676 | 5.05  |
| chr19 | 52317043 | 52317894 | 3.7   |
| chr19 | 52335882 | 52336846 | 3.03  |
| chr19 | 52362833 | 52368147 | 9.42  |
| chr19 | 52373280 | 52374416 | 4.04  |
| chr19 | 52374710 | 52377611 | 6.39  |
| chr19 | 52378535 | 52379897 | 4.04  |
| chr19 | 52380147 | 52382014 | 3.36  |
| chr19 | 52382786 | 52384507 | 3.7   |
| chr19 | 52393342 | 52396349 | 11.1  |
| chr19 | 52399358 | 52401045 | 4.04  |
| chr19 | 52406995 | 52408743 | 4.37  |
| chr19 | 52414116 | 52415381 | 3.7   |

|       |          |          |       |
|-------|----------|----------|-------|
| chr19 | 52415802 | 52420241 | 9.08  |
| chr19 | 52420902 | 52423229 | 4.04  |
| chr19 | 52424804 | 52426493 | 4.37  |
| chr19 | 52428607 | 52430897 | 4.71  |
| chr19 | 52437242 | 52438785 | 4.71  |
| chr19 | 52446252 | 52450466 | 8.41  |
| chr19 | 52451578 | 52453021 | 4.37  |
| chr19 | 52453951 | 52454878 | 4.37  |
| chr19 | 52456960 | 52457944 | 3.7   |
| chr19 | 52461840 | 52462964 | 4.04  |
| chr19 | 52464920 | 52465790 | 3.03  |
| chr19 | 52466839 | 52469763 | 5.38  |
| chr19 | 52470488 | 52472919 | 5.38  |
| chr19 | 52473531 | 52483939 | 6.39  |
| chr19 | 52484473 | 52486055 | 3.7   |
| chr19 | 52486689 | 52488407 | 4.04  |
| chr19 | 52489503 | 52490462 | 4.04  |
| chr19 | 52490699 | 52493156 | 5.05  |
| chr19 | 52493930 | 52503026 | 10.43 |
| chr19 | 52504770 | 52505777 | 3.7   |
| chr19 | 52509925 | 52511939 | 4.04  |
| chr19 | 52512496 | 52514845 | 4.71  |
| chr19 | 52516445 | 52520842 | 5.38  |
| chr19 | 52521369 | 52523668 | 3.7   |
| chr19 | 52523882 | 52525856 | 4.04  |
| chr19 | 52527059 | 52527924 | 3.36  |
| chr19 | 52529008 | 52529776 | 3.7   |
| chr19 | 52530503 | 52531467 | 3.7   |
| chr19 | 52532943 | 52534820 | 4.04  |
| chr19 | 52536056 | 52541458 | 9.75  |
| chr19 | 52543096 | 52545677 | 3.36  |
| chr19 | 52551313 | 52552966 | 4.37  |
| chr19 | 52553346 | 52555515 | 4.04  |
| chr19 | 52560825 | 52562306 | 5.72  |
| chr19 | 52562632 | 52564509 | 4.04  |
| chr19 | 52564956 | 52566149 | 3.7   |
| chr19 | 52566515 | 52573183 | 8.07  |
| chr19 | 52574806 | 52576551 | 4.04  |
| chr19 | 52584498 | 52585864 | 4.71  |
| chr19 | 52587340 | 52589603 | 3.7   |
| chr19 | 52592003 | 52593349 | 4.37  |
| chr19 | 52598344 | 52612588 | 5.38  |
| chr19 | 52613421 | 52624746 | 14.8  |

|       |          |          |       |
|-------|----------|----------|-------|
| chr19 | 52626211 | 52629477 | 4.37  |
| chr19 | 52634717 | 52639543 | 5.72  |
| chr19 | 52646821 | 52649136 | 4.37  |
| chr19 | 52649866 | 52652693 | 4.37  |
| chr19 | 52654101 | 52662824 | 11.77 |
| chr19 | 52665237 | 52666529 | 3.36  |
| chr19 | 52756709 | 52757707 | 4.71  |
| chr19 | 52775139 | 52778490 | 4.37  |
| chr19 | 52778700 | 52781549 | 4.71  |
| chr19 | 52781841 | 52783362 | 3.7   |
| chr19 | 52784539 | 52785561 | 3.7   |
| chr19 | 52787287 | 52788910 | 4.37  |
| chr19 | 52793214 | 52796439 | 5.72  |
| chr19 | 52802126 | 52803233 | 4.04  |
| chr19 | 52803487 | 52807102 | 4.37  |
| chr19 | 52808050 | 52813405 | 6.05  |
| chr19 | 52819558 | 52820423 | 3.36  |
| chr19 | 52821419 | 52823253 | 4.04  |
| chr19 | 52823953 | 52828802 | 5.38  |
| chr19 | 52829082 | 52831464 | 5.05  |
| chr19 | 52832229 | 52833207 | 3.36  |
| chr19 | 52834226 | 52836468 | 4.37  |
| chr19 | 52838508 | 52839499 | 4.04  |
| chr19 | 52851476 | 52852622 | 3.7   |
| chr19 | 52857946 | 52858778 | 3.36  |
| chr19 | 52861448 | 52865094 | 5.05  |
| chr19 | 52865367 | 52866398 | 4.04  |
| chr19 | 52866605 | 52870606 | 5.72  |
| chr19 | 52873033 | 52874724 | 3.7   |
| chr19 | 52885360 | 52890844 | 5.38  |
| chr19 | 52893735 | 52894998 | 4.37  |
| chr19 | 52898114 | 52899089 | 3.7   |
| chr19 | 52913399 | 52915451 | 4.37  |
| chr19 | 52916266 | 52921000 | 5.72  |
| chr19 | 52928822 | 52929730 | 3.7   |
| chr19 | 52944463 | 52946057 | 4.04  |
| chr19 | 52949576 | 52950691 | 5.38  |
| chr19 | 52959335 | 52960421 | 3.7   |
| chr19 | 52971059 | 52971948 | 4.04  |
| chr19 | 52972197 | 52974933 | 4.04  |
| chr19 | 52975511 | 52981331 | 10.09 |
| chr19 | 53001770 | 53002705 | 4.04  |
| chr19 | 53006139 | 53006969 | 3.7   |



|       |          |          |      |
|-------|----------|----------|------|
| chr19 | 53013569 | 53014665 | 3.36 |
| chr19 | 53016971 | 53017787 | 3.36 |
| chr19 | 53021663 | 53022326 | 4.37 |
| chr19 | 53024124 | 53025362 | 4.04 |
| chr19 | 53027708 | 53028500 | 3.36 |
| chr19 | 53044129 | 53045687 | 4.04 |
| chr19 | 53056468 | 53059501 | 7.74 |
| chr19 | 53068374 | 53069297 | 3.36 |
| chr19 | 53072799 | 53074066 | 3.36 |
| chr19 | 53086365 | 53088719 | 4.37 |
| chr19 | 53090445 | 53091268 | 4.37 |
| chr19 | 53100293 | 53102158 | 4.37 |
| chr19 | 53108630 | 53110432 | 4.37 |
| chr19 | 53112401 | 53113268 | 4.04 |
| chr19 | 53115395 | 53119844 | 6.39 |
| chr19 | 53123568 | 53125254 | 3.7  |
| chr19 | 53206861 | 53207954 | 4.04 |
| chr19 | 53225155 | 53226483 | 4.04 |
| chr19 | 53241945 | 53243268 | 3.7  |
| chr19 | 53245640 | 53246923 | 4.04 |
| chr19 | 53267786 | 53271726 | 4.04 |
| chr19 | 53272464 | 53274655 | 3.7  |
| chr19 | 53289175 | 53290212 | 4.04 |
| chr19 | 53297224 | 53298683 | 4.04 |
| chr19 | 53299916 | 53307104 | 7.4  |
| chr19 | 53319007 | 53319625 | 4.71 |
| chr19 | 53325083 | 53326858 | 3.7  |
| chr19 | 53327344 | 53328939 | 3.7  |
| chr19 | 53340819 | 53345044 | 5.72 |
| chr19 | 53345315 | 53346725 | 4.37 |
| chr19 | 53348935 | 53349852 | 3.03 |
| chr19 | 53352093 | 53353012 | 4.37 |
| chr19 | 53360569 | 53361614 | 4.04 |
| chr19 | 53361906 | 53362790 | 4.04 |
| chr19 | 53365475 | 53366888 | 3.7  |
| chr19 | 53383172 | 53386035 | 9.42 |
| chr19 | 53386266 | 53387030 | 4.37 |
| chr19 | 53387495 | 53388711 | 3.7  |
| chr19 | 53389220 | 53390383 | 5.38 |
| chr19 | 53400293 | 53401164 | 3.03 |
| chr19 | 53415547 | 53416920 | 4.04 |
| chr19 | 53431107 | 53432699 | 4.37 |
| chr19 | 53437934 | 53441236 | 4.04 |

|       |          |          |       |
|-------|----------|----------|-------|
| chr19 | 53449846 | 53456836 | 7.06  |
| chr19 | 53459465 | 53460803 | 4.04  |
| chr19 | 53461190 | 53463548 | 4.71  |
| chr19 | 53463977 | 53466489 | 5.38  |
| chr19 | 53469402 | 53472942 | 4.71  |
| chr19 | 53485721 | 53487040 | 4.37  |
| chr19 | 53487546 | 53491113 | 5.72  |
| chr19 | 53491810 | 53493307 | 4.37  |
| chr19 | 53497621 | 53498600 | 3.36  |
| chr19 | 53514196 | 53515574 | 4.37  |
| chr19 | 53520728 | 53521562 | 2.35  |
| chr19 | 53537297 | 53538251 | 4.04  |
| chr19 | 53539411 | 53540845 | 3.36  |
| chr19 | 53550277 | 53551832 | 6.05  |
| chr19 | 53556358 | 53557803 | 4.04  |
| chr19 | 53558899 | 53562274 | 6.05  |
| chr19 | 53567896 | 53573851 | 10.76 |
| chr19 | 53578002 | 53579593 | 4.04  |
| chr19 | 53581248 | 53582506 | 4.37  |
| chr19 | 53583752 | 53585471 | 4.04  |
| chr19 | 53597207 | 53598601 | 4.37  |
| chr19 | 53600601 | 53601609 | 3.36  |
| chr19 | 53601819 | 53603046 | 3.7   |
| chr19 | 53611028 | 53612876 | 4.37  |
| chr19 | 53613152 | 53614391 | 4.71  |
| chr19 | 53622679 | 53623908 | 4.37  |
| chr19 | 53627366 | 53628460 | 4.04  |
| chr19 | 53639343 | 53640943 | 3.7   |
| chr19 | 53641784 | 53643110 | 4.37  |
| chr19 | 53643432 | 53646603 | 4.04  |
| chr19 | 53651131 | 53652082 | 3.36  |
| chr19 | 53664320 | 53665366 | 3.36  |
| chr19 | 53667682 | 53670502 | 6.73  |
| chr19 | 53680599 | 53681666 | 3.7   |
| chr19 | 53701051 | 53704615 | 5.05  |
| chr19 | 53706522 | 53707350 | 4.04  |
| chr19 | 53713027 | 53718516 | 9.42  |
| chr19 | 53719099 | 53720373 | 4.04  |
| chr19 | 53721177 | 53725243 | 5.05  |
| chr19 | 53727619 | 53728659 | 4.37  |
| chr19 | 53731143 | 53732016 | 4.04  |
| chr19 | 53739013 | 53741669 | 5.38  |
| chr19 | 53758992 | 53760403 | 3.03  |

|       |          |          |      |
|-------|----------|----------|------|
| chr19 | 53767284 | 53768224 | 4.04 |
| chr19 | 53796894 | 53798819 | 5.05 |
| chr19 | 53808431 | 53809551 | 3.7  |
| chr19 | 53828693 | 53829570 | 4.04 |
| chr19 | 53830581 | 53832985 | 6.05 |
| chr19 | 53834167 | 53835232 | 5.05 |
| chr19 | 53839866 | 53842075 | 4.04 |
| chr19 | 53846312 | 53847712 | 4.04 |
| chr19 | 53852509 | 53862433 | 5.72 |
| chr19 | 53865961 | 53866752 | 4.04 |
| chr19 | 53878712 | 53880224 | 4.04 |
| chr19 | 53884059 | 53889257 | 6.05 |
| chr19 | 53892395 | 53894825 | 4.71 |
| chr19 | 53906377 | 53908390 | 5.05 |
| chr19 | 53910562 | 53917181 | 8.07 |
| chr19 | 53921989 | 53922900 | 3.7  |
| chr19 | 53941536 | 53942633 | 4.04 |
| chr19 | 53943887 | 53944879 | 3.7  |
| chr19 | 53954038 | 53955039 | 4.04 |
| chr19 | 53958286 | 53962448 | 7.06 |
| chr19 | 53963945 | 53969126 | 5.38 |
| chr19 | 53979626 | 53981139 | 4.04 |
| chr19 | 53981481 | 53982696 | 4.04 |
| chr19 | 53990667 | 53991846 | 3.7  |
| chr19 | 53994152 | 53997524 | 4.37 |
| chr19 | 54028920 | 54029815 | 4.37 |
| chr19 | 54079545 | 54081627 | 5.05 |
| chr19 | 54157447 | 54159476 | 8.75 |
| chr19 | 54598603 | 54599446 | 1.68 |
| chr19 | 54761177 | 54762382 | 1.68 |
| chr19 | 54797439 | 54799008 | 2.35 |
| chr19 | 54959959 | 54961089 | 2.35 |
| chr19 | 55439280 | 55440291 | 4.04 |
| chr19 | 55692273 | 55693407 | 1.68 |
| chr19 | 55723576 | 55724322 | 2.35 |
| chr19 | 55768512 | 55769825 | 2.02 |
| chr19 | 55770101 | 55771233 | 6.39 |
| chr19 | 56151979 | 56153047 | 3.7  |
| chr19 | 56154386 | 56155284 | 3.36 |
| chr19 | 56181290 | 56182342 | 2.02 |
| chr19 | 56484996 | 56485884 | 2.69 |
| chr19 | 56636814 | 56637601 | 1.68 |
| chr19 | 56653381 | 56654278 | 2.35 |

|       |          |          |       |
|-------|----------|----------|-------|
| chr19 | 56852620 | 56854301 | 6.05  |
| chr19 | 56857221 | 56858078 | 1.68  |
| chr19 | 56888408 | 56889648 | 5.05  |
| chr19 | 56932539 | 56936943 | 10.43 |
| chr19 | 56937631 | 56938609 | 4.04  |
| chr19 | 56952109 | 56953959 | 5.05  |
| chr19 | 57035572 | 57037906 | 6.05  |
| chr19 | 57065415 | 57066271 | 3.36  |
| chr19 | 57088227 | 57090771 | 5.72  |
| chr19 | 57148844 | 57150083 | 3.7   |
| chr19 | 57311490 | 57312503 | 6.05  |
| chr19 | 57313787 | 57314693 | 3.36  |
| chr19 | 57352857 | 57353700 | 3.7   |
| chr19 | 57622075 | 57623798 | 4.71  |
| chr19 | 57629088 | 57630325 | 3.7   |
| chr19 | 57711606 | 57712354 | 2.02  |
| chr19 | 57724091 | 57725091 | 3.36  |
| chr19 | 57764193 | 57766830 | 4.71  |
| chr19 | 57790745 | 57791925 | 4.04  |
| chr19 | 57801845 | 57805231 | 7.4   |
| chr19 | 57805739 | 57807371 | 3.7   |
| chr19 | 57807758 | 57808973 | 4.04  |
| chr19 | 57812884 | 57813717 | 3.36  |
| chr19 | 57819243 | 57820453 | 3.7   |
| chr19 | 57829559 | 57830389 | 3.7   |
| chr19 | 57839285 | 57841024 | 4.37  |
| chr19 | 57867773 | 57870745 | 5.05  |
| chr19 | 57884844 | 57886440 | 5.05  |
| chr19 | 57887862 | 57892872 | 8.07  |
| chr19 | 57894431 | 57895447 | 4.71  |
| chr19 | 57905075 | 57905978 | 3.7   |
| chr19 | 57908258 | 57913160 | 7.06  |
| chr19 | 57913987 | 57915816 | 7.4   |
| chr19 | 57930248 | 57933911 | 7.06  |
| chr19 | 57938557 | 57940065 | 4.04  |
| chr19 | 57950957 | 57957718 | 5.72  |
| chr19 | 57961079 | 57963986 | 4.37  |
| chr19 | 57974945 | 57976335 | 4.04  |
| chr19 | 57977037 | 57979415 | 5.38  |
| chr19 | 57981755 | 57988139 | 8.75  |
| chr19 | 58004917 | 58006472 | 3.7   |
| chr19 | 58023497 | 58026009 | 6.39  |
| chr19 | 58041643 | 58043883 | 4.04  |

|       |          |          |       |
|-------|----------|----------|-------|
| chr19 | 58044449 | 58051955 | 12.78 |
| chr19 | 58053103 | 58054972 | 4.37  |
| chr19 | 58055206 | 58060181 | 6.39  |
| chr19 | 58060674 | 58061740 | 3.03  |
| chr19 | 58069007 | 58070359 | 3.03  |
| chr19 | 58074541 | 58087746 | 11.44 |
| chr19 | 58089620 | 58090677 | 3.03  |
| chr19 | 58095850 | 58097234 | 4.04  |
| chr19 | 58098027 | 58099596 | 3.7   |
| chr19 | 58099971 | 58104353 | 5.72  |
| chr19 | 58110483 | 58111866 | 4.04  |
| chr19 | 58114399 | 58116380 | 4.37  |
| chr19 | 58117301 | 58120099 | 4.37  |
| chr19 | 58125441 | 58137849 | 13.79 |
| chr19 | 58147124 | 58149550 | 5.05  |
| chr19 | 58151683 | 58154774 | 5.72  |
| chr19 | 58193740 | 58206351 | 10.09 |
| chr19 | 58208612 | 58209904 | 3.7   |
| chr19 | 58211135 | 58214758 | 5.72  |
| chr19 | 58215227 | 58218263 | 4.71  |
| chr19 | 58220321 | 58221342 | 3.7   |
| chr19 | 58228682 | 58229678 | 3.7   |
| chr19 | 58230242 | 58236297 | 8.07  |
| chr19 | 58237578 | 58238959 | 4.04  |
| chr19 | 58239458 | 58240588 | 4.04  |
| chr19 | 58248815 | 58249735 | 3.7   |
| chr19 | 58260445 | 58261672 | 4.04  |
| chr19 | 58262149 | 58268530 | 5.05  |
| chr19 | 58283655 | 58285642 | 4.71  |
| chr19 | 58287122 | 58293312 | 10.43 |
| chr19 | 58295245 | 58296319 | 4.37  |
| chr19 | 58298516 | 58301191 | 4.71  |
| chr19 | 58335843 | 58336665 | 3.36  |
| chr19 | 58352507 | 58353212 | 3.7   |
| chr19 | 58371406 | 58372879 | 3.03  |
| chr19 | 58376088 | 58378233 | 3.7   |
| chr19 | 58382246 | 58386316 | 8.75  |
| chr19 | 58397238 | 58398420 | 4.04  |
| chr19 | 58399263 | 58400207 | 3.7   |
| chr19 | 58412141 | 58413390 | 4.37  |
| chr19 | 58414348 | 58415507 | 4.71  |
| chr19 | 58418517 | 58419321 | 3.7   |
| chr19 | 58435228 | 58436564 | 4.04  |

|       |          |          |       |
|-------|----------|----------|-------|
| chr19 | 58436834 | 58440169 | 6.73  |
| chr19 | 58442914 | 58445963 | 4.71  |
| chr19 | 58447202 | 58448435 | 4.37  |
| chr19 | 58451496 | 58455648 | 5.72  |
| chr19 | 58456527 | 58457684 | 4.37  |
| chr19 | 58457891 | 58460411 | 5.05  |
| chr19 | 58460787 | 58461893 | 3.03  |
| chr19 | 58462246 | 58463816 | 4.04  |
| chr19 | 58469483 | 58470907 | 5.72  |
| chr19 | 58472078 | 58473569 | 5.05  |
| chr19 | 58475496 | 58476722 | 4.71  |
| chr19 | 58477984 | 58479220 | 3.36  |
| chr19 | 58482016 | 58484369 | 4.37  |
| chr19 | 58484945 | 58486273 | 5.05  |
| chr19 | 58486932 | 58495863 | 18.16 |
| chr19 | 58496973 | 58498515 | 4.37  |
| chr19 | 58498826 | 58500166 | 4.71  |
| chr19 | 58502068 | 58504417 | 5.05  |
| chr19 | 58504772 | 58506246 | 3.7   |
| chr19 | 58506478 | 58508066 | 3.7   |
| chr19 | 58512922 | 58514734 | 4.04  |
| chr19 | 58518262 | 58519357 | 4.04  |
| chr19 | 58534906 | 58535952 | 5.05  |
| chr19 | 58552209 | 58553326 | 4.37  |
| chr19 | 58556213 | 58559685 | 5.05  |
| chr19 | 58562361 | 58567356 | 5.05  |
| chr19 | 58568506 | 58570801 | 4.04  |
| chr19 | 58574061 | 58575030 | 3.36  |
| chr19 | 58576891 | 58580360 | 6.39  |
| chr19 | 58583876 | 58585085 | 4.04  |
| chr19 | 58592260 | 58593123 | 3.7   |
| chr19 | 58594721 | 58596047 | 3.7   |
| chr19 | 58597006 | 58598572 | 3.7   |
| chr19 | 58602905 | 58603863 | 4.71  |
| chr19 | 58605763 | 58607183 | 5.38  |
| chr19 | 58607459 | 58608794 | 4.71  |
| chr19 | 58609302 | 58610167 | 3.03  |
| chr19 | 58615755 | 58617829 | 5.72  |
| chr19 | 58618142 | 58622287 | 10.43 |
| chr19 | 58626226 | 58629959 | 4.37  |
| chr19 | 58631362 | 58632501 | 3.36  |
| chr19 | 58633075 | 58643614 | 14.46 |
| chr19 | 58644306 | 58647735 | 5.38  |

|       |          |          |       |
|-------|----------|----------|-------|
| chr19 | 58649018 | 58651935 | 4.71  |
| chr19 | 58653100 | 58654308 | 4.04  |
| chr19 | 58656604 | 58657962 | 5.38  |
| chr19 | 58659722 | 58662803 | 6.05  |
| chr19 | 58665496 | 58667136 | 5.72  |
| chr19 | 58672784 | 58675647 | 4.04  |
| chr19 | 58676374 | 58679349 | 7.74  |
| chr19 | 58679758 | 58681223 | 4.37  |
| chr19 | 58681879 | 58683611 | 3.7   |
| chr19 | 58687514 | 58690252 | 5.05  |
| chr19 | 58692765 | 58695783 | 5.05  |
| chr19 | 58696597 | 58699398 | 4.37  |
| chr19 | 58700091 | 58719292 | 12.11 |
| chr19 | 58720099 | 58730101 | 6.73  |
| chr19 | 58733216 | 58734771 | 4.37  |
| chr19 | 58735449 | 58737897 | 5.05  |
| chr19 | 58744971 | 58746740 | 3.7   |
| chr19 | 58748358 | 58750221 | 4.37  |
| chr19 | 58753227 | 58755888 | 4.37  |
| chr19 | 58756787 | 58779151 | 17.49 |
| chr19 | 58795274 | 58796341 | 5.38  |
| chr19 | 58802072 | 58809715 | 7.06  |
| chr19 | 58838068 | 58839266 | 4.71  |
| chr19 | 58891588 | 58892479 | 3.36  |
| chr19 | 58928202 | 58929313 | 4.04  |
| chr19 | 58941210 | 58942639 | 5.05  |
| chr19 | 58943146 | 58946785 | 6.05  |
| chr19 | 58952173 | 58953392 | 4.04  |
| chr19 | 58959854 | 58961326 | 7.06  |
| chr19 | 58977837 | 58978679 | 2.69  |
| chr19 | 59010540 | 59011293 | 2.69  |
| chr19 | 59030374 | 59031976 | 4.37  |
| chr18 | 12482    | 13390    | 2.69  |
| chr18 | 812628   | 813341   | 4.37  |
| chr18 | 3235986  | 3237228  | 5.38  |
| chr18 | 3240426  | 3241948  | 4.04  |
| chr18 | 3247621  | 3248491  | 4.04  |
| chr18 | 3260735  | 3262912  | 3.36  |
| chr18 | 3290343  | 3291942  | 5.38  |
| chr18 | 3389261  | 3390969  | 4.71  |
| chr18 | 3623548  | 3624547  | 4.71  |
| chr18 | 4060085  | 4061349  | 5.72  |
| chr18 | 8836664  | 8837865  | 5.05  |

|                |          |          |       |
|----------------|----------|----------|-------|
| chr18          | 9293732  | 9294536  | 4.71  |
| chr18          | 9447126  | 9448017  | 4.04  |
| chr18          | 10082508 | 10083597 | 4.04  |
| chr18          | 10945541 | 10946961 | 4.71  |
| chr18          | 11347468 | 11348702 | 5.38  |
| chr18          | 11543895 | 11544668 | 4.04  |
| chr18          | 11956802 | 11957904 | 4.04  |
| chr18          | 13596555 | 13598037 | 8.75  |
| chr18          | 13702961 | 13705120 | 8.41  |
| chr18          | 14104111 | 14105702 | 4.04  |
| chr18          | 14109278 | 14110414 | 3.7   |
| chr18          | 15407116 | 15408486 | 4.71  |
| chr18          | 15409016 | 15410167 | 4.71  |
| chr18          | 18510791 | 18520921 | 34.31 |
| chr18          | 20849582 | 20850858 | 7.06  |
| chr18          | 21221471 | 21222272 | 4.37  |
| chr18          | 29298968 | 29299799 | 4.04  |
| chr18          | 29357773 | 29359290 | 9.75  |
| chr18          | 29553444 | 29554748 | 7.4   |
| chr18          | 32824654 | 32826602 | 3.7   |
| chr18          | 32832882 | 32834213 | 4.71  |
| chr18          | 32834751 | 32835607 | 3.03  |
| chr18          | 32863720 | 32865201 | 3.7   |
| chr18          | 32879619 | 32880873 | 4.37  |
| chr18          | 32882344 | 32883242 | 4.37  |
| chr18          | 32885289 | 32889036 | 6.73  |
| chr18          | 32889846 | 32891176 | 4.04  |
| chr18          | 32931847 | 32933159 | 4.04  |
| chr18          | 33617534 | 33619130 | 7.06  |
| chr18          | 33681020 | 33683007 | 5.05  |
| chr18          | 43372113 | 43374143 | 4.04  |
| chr18          | 44710641 | 44711528 | 4.04  |
| chr18          | 52218406 | 52219378 | 5.05  |
| chr18          | 67385562 | 67387148 | 3.36  |
| chr18          | 67893999 | 67895520 | 5.72  |
| chr18          | 67938503 | 67939904 | 4.71  |
| chr18          | 72216233 | 72217741 | 7.74  |
| chr18          | 74460850 | 74462672 | 4.37  |
| chr18          | 77656678 | 77658351 | 4.37  |
| chr18          | 77781414 | 77783712 | 16.15 |
| chr18          | 77821610 | 77822817 | 5.05  |
| :hrUn_gl00021: | 6230     | 7667     | 3.7   |
| :hrUn_gl00021: | 110246   | 111284   | 5.38  |



|                |          |          |       |
|----------------|----------|----------|-------|
| :hrUn_gl00021! | 115559   | 116657   | 5.38  |
| :hrUn_gl00021! | 170555   | 171492   | 3.7   |
| :hrUn_gl00021! | 176030   | 178279   | 4.37  |
| _gl000195_ran  | 6578     | 14822    | 0     |
| _gl000195_ran  | 15477    | 16424    | 0     |
| _gl000195_ran  | 16763    | 18880    | 0     |
| _gl000195_ran  | 21437    | 23521    | 0     |
| _gl000195_ran  | 24497    | 65635    | 0     |
| _gl000195_ran  | 68651    | 69819    | 0     |
| _gl000195_ran  | 71241    | 72397    | 0     |
| _gl000195_ran  | 72704    | 75071    | 0     |
| _gl000195_ran  | 76105    | 78290    | 0     |
| _gl000195_ran  | 80860    | 86413    | 0     |
| _gl000195_ran  | 87396    | 89533    | 0     |
| _gl000195_ran  | 90504    | 92773    | 0     |
| _gl000195_ran  | 96080    | 97836    | 0     |
| _gl000195_ran  | 99275    | 100610   | 0     |
| _gl000195_ran  | 102003   | 104076   | 0     |
| _gl000193_ran  | 25432    | 28537    | 0     |
| _gl000193_ran  | 35040    | 35894    | 0     |
| _gl000193_ran  | 86190    | 87068    | 0     |
| chr22          | 16850231 | 16851031 | 4.37  |
| chr22          | 18110778 | 18111857 | 4.71  |
| chr22          | 19303653 | 19305103 | 13.45 |
| chr22          | 19419318 | 19420455 | 4.04  |
| chr22          | 19635622 | 19636684 | 5.72  |
| chr22          | 22813285 | 22814682 | 3.7   |
| chr22          | 23322647 | 23324750 | 5.05  |
| chr22          | 23788342 | 23789333 | 4.71  |
| chr22          | 24591500 | 24592404 | 4.71  |
| chr22          | 24951422 | 24952157 | 4.71  |
| chr22          | 25111999 | 25113462 | 6.05  |
| chr22          | 29209343 | 29210457 | 4.37  |
| chr22          | 29214224 | 29215708 | 4.04  |
| chr22          | 29242504 | 29243891 | 7.4   |
| chr22          | 30086248 | 30087413 | 4.04  |
| chr22          | 31367711 | 31369060 | 4.04  |
| chr22          | 31370230 | 31371586 | 3.7   |
| chr22          | 33101713 | 33103246 | 7.06  |
| chr22          | 34184483 | 34185776 | 7.4   |
| chr22          | 34316907 | 34317860 | 3.36  |
| chr22          | 34454910 | 34455878 | 3.36  |
| chr22          | 34730389 | 34731674 | 5.72  |

|       |          |          |      |
|-------|----------|----------|------|
| chr22 | 36062656 | 36064025 | 3.7  |
| chr22 | 40067895 | 40068722 | 1.68 |
| chr22 | 42510790 | 42511927 | 4.37 |
| chr22 | 46191531 | 46192807 | 7.06 |
| chr22 | 46575964 | 46577893 | 5.05 |
| chr22 | 47151516 | 47152820 | 7.4  |
| chr22 | 47979328 | 47980511 | 6.05 |
| chr22 | 50160500 | 50161633 | 5.38 |
| chr22 | 51086911 | 51087577 | 6.05 |
| chr20 | 725715   | 727322   | 7.06 |
| chr20 | 786091   | 787409   | 5.72 |
| chr20 | 911631   | 912482   | 5.05 |
| chr20 | 2385525  | 2386281  | 1.35 |
| chr20 | 3219906  | 3220756  | 2.02 |
| chr20 | 3748825  | 3751048  | 4.04 |
| chr20 | 3761457  | 3762575  | 3.36 |
| chr20 | 3791761  | 3793292  | 4.71 |
| chr20 | 3796830  | 3797650  | 2.02 |
| chr20 | 3798760  | 3801820  | 4.04 |
| chr20 | 4075903  | 4076876  | 4.37 |
| chr20 | 6699020  | 6700304  | 1.68 |
| chr20 | 7863649  | 7864413  | 4.71 |
| chr20 | 8084964  | 8088699  | 4.04 |
| chr20 | 8444701  | 8445607  | 3.7  |
| chr20 | 8670381  | 8671667  | 5.72 |
| chr20 | 10199944 | 10200911 | 4.37 |
| chr20 | 11812461 | 11813296 | 1.68 |
| chr20 | 13200567 | 13201464 | 2.35 |
| chr20 | 13224020 | 13224935 | 4.37 |
| chr20 | 13973451 | 13975239 | 5.72 |
| chr20 | 13999736 | 14001084 | 4.04 |
| chr20 | 14859553 | 14860573 | 3.7  |
| chr20 | 15156547 | 15157836 | 5.72 |
| chr20 | 15262428 | 15263345 | 3.7  |
| chr20 | 16553519 | 16554905 | 4.37 |
| chr20 | 16635156 | 16636465 | 4.04 |
| chr20 | 16735903 | 16737011 | 3.36 |
| chr20 | 16806068 | 16807035 | 3.36 |
| chr20 | 17015438 | 17016607 | 4.04 |
| chr20 | 17549167 | 17551232 | 4.37 |
| chr20 | 17552326 | 17553146 | 4.04 |
| chr20 | 17585405 | 17586530 | 4.37 |
| chr20 | 17660766 | 17662666 | 4.37 |

|       |          |          |      |
|-------|----------|----------|------|
| chr20 | 17948984 | 17949965 | 4.37 |
| chr20 | 18063969 | 18064951 | 3.7  |
| chr20 | 18257141 | 18257902 | 3.36 |
| chr20 | 18265473 | 18266972 | 5.05 |
| chr20 | 18307754 | 18309387 | 5.05 |
| chr20 | 18311955 | 18313275 | 4.71 |
| chr20 | 18477268 | 18478292 | 4.04 |
| chr20 | 18937518 | 18938407 | 3.7  |
| chr20 | 19027681 | 19029014 | 5.05 |
| chr20 | 19044894 | 19046714 | 7.74 |
| chr20 | 19047570 | 19049624 | 4.71 |
| chr20 | 19110509 | 19111413 | 3.7  |
| chr20 | 19119361 | 19120802 | 4.37 |
| chr20 | 19232837 | 19234331 | 4.37 |
| chr20 | 19263741 | 19264972 | 4.04 |
| chr20 | 19370668 | 19371456 | 3.7  |
| chr20 | 19697107 | 19697925 | 4.37 |
| chr20 | 19747482 | 19748440 | 5.05 |
| chr20 | 19764320 | 19765747 | 4.37 |
| chr20 | 19997412 | 19998581 | 4.37 |
| chr20 | 20109685 | 20111833 | 9.42 |
| chr20 | 20752592 | 20753506 | 4.04 |
| chr20 | 20760768 | 20761614 | 4.37 |
| chr20 | 21283347 | 21284114 | 3.7  |
| chr20 | 21575883 | 21576755 | 1.68 |
| chr20 | 21586016 | 21586914 | 4.04 |
| chr20 | 22785442 | 22786439 | 4.04 |
| chr20 | 23248591 | 23249711 | 4.37 |
| chr20 | 23445823 | 23447319 | 4.04 |
| chr20 | 23541784 | 23543255 | 4.37 |
| chr20 | 23900709 | 23901782 | 4.37 |
| chr20 | 23918660 | 23919838 | 5.05 |
| chr20 | 23942910 | 23946093 | 9.42 |
| chr20 | 23948654 | 23949732 | 3.36 |
| chr20 | 24121463 | 24122730 | 4.71 |
| chr20 | 24369316 | 24370189 | 3.03 |
| chr20 | 24395517 | 24398156 | 9.08 |
| chr20 | 24630251 | 24631326 | 3.7  |
| chr20 | 24834743 | 24835861 | 4.04 |
| chr20 | 24844989 | 24846564 | 5.05 |
| chr20 | 24878538 | 24881154 | 8.75 |
| chr20 | 24921378 | 24922236 | 4.04 |
| chr20 | 24997553 | 24998920 | 5.05 |

|       |          |          |       |
|-------|----------|----------|-------|
| chr20 | 25145170 | 25146791 | 10.43 |
| chr20 | 25235748 | 25236525 | 4.04  |
| chr20 | 25341149 | 25342144 | 3.36  |
| chr20 | 25382900 | 25384619 | 5.72  |
| chr20 | 25494645 | 25496342 | 7.06  |
| chr20 | 25498508 | 25499361 | 3.03  |
| chr20 | 25603406 | 25605625 | 5.72  |
| chr20 | 25616660 | 25618929 | 16.82 |
| chr20 | 25676758 | 25677681 | 3.36  |
| chr20 | 26181229 | 26182606 | 5.05  |
| chr20 | 26205749 | 26206608 | 2.35  |
| chr20 | 26261692 | 26262731 | 4.37  |
| chr20 | 26293170 | 26294141 | 6.39  |
| chr20 | 26309945 | 26311190 | 5.38  |
| chr20 | 26312785 | 26314110 | 6.05  |
| chr20 | 26315255 | 26319122 | 7.74  |
| chr20 | 29600153 | 29601318 | 6.05  |
| chr20 | 29646150 | 29647077 | 3.36  |
| chr20 | 29651254 | 29654065 | 6.05  |
| chr20 | 29803752 | 29804496 | 5.05  |
| chr20 | 29816397 | 29819139 | 6.05  |
| chr20 | 29824431 | 29826189 | 5.72  |
| chr20 | 29827719 | 29828908 | 4.37  |
| chr20 | 30102545 | 30103487 | 3.36  |
| chr20 | 30154443 | 30155303 | 4.37  |
| chr20 | 30160096 | 30161415 | 4.71  |
| chr20 | 30180814 | 30184263 | 5.05  |
| chr20 | 30196043 | 30197026 | 3.7   |
| chr20 | 30311319 | 30312172 | 4.37  |
| chr20 | 30445599 | 30446418 | 1.35  |
| chr20 | 30696818 | 30697833 | 3.36  |
| chr20 | 30794435 | 30795456 | 4.37  |
| chr20 | 31988618 | 31989590 | 4.71  |
| chr20 | 32319660 | 32321130 | 4.04  |
| chr20 | 32324033 | 32325755 | 14.46 |
| chr20 | 33783816 | 33785134 | 5.72  |
| chr20 | 34287136 | 34288037 | 3.7   |
| chr20 | 34541759 | 34542802 | 4.71  |
| chr20 | 36870731 | 36872043 | 4.04  |
| chr20 | 39519662 | 39521914 | 3.36  |
| chr20 | 39528147 | 39529209 | 3.7   |
| chr20 | 39532034 | 39532874 | 3.7   |
| chr20 | 39533972 | 39535286 | 4.37  |

|       |          |          |      |
|-------|----------|----------|------|
| chr20 | 39546738 | 39547507 | 4.37 |
| chr20 | 39548580 | 39549602 | 3.36 |
| chr20 | 39554635 | 39555373 | 2.69 |
| chr20 | 39569388 | 39570593 | 3.03 |
| chr20 | 39571730 | 39572670 | 2.35 |
| chr20 | 39574093 | 39575241 | 3.7  |
| chr20 | 39576894 | 39578994 | 4.71 |
| chr20 | 39581975 | 39584315 | 3.36 |
| chr20 | 39585794 | 39587663 | 4.04 |
| chr20 | 39588963 | 39590739 | 4.37 |
| chr20 | 39591214 | 39592355 | 4.04 |
| chr20 | 39605121 | 39608293 | 7.74 |
| chr20 | 39631296 | 39637567 | 7.4  |
| chr20 | 39643069 | 39644016 | 4.04 |
| chr20 | 39645378 | 39647324 | 7.74 |
| chr20 | 39649163 | 39650105 | 3.36 |
| chr20 | 39656250 | 39658869 | 4.71 |
| chr20 | 39662313 | 39663357 | 3.36 |
| chr20 | 39670774 | 39672658 | 4.71 |
| chr20 | 39674377 | 39676086 | 3.36 |
| chr20 | 39681458 | 39684838 | 4.37 |
| chr20 | 39686684 | 39687882 | 4.04 |
| chr20 | 39690439 | 39692985 | 4.71 |
| chr20 | 39698646 | 39699929 | 3.7  |
| chr20 | 39700350 | 39702205 | 4.04 |
| chr20 | 39704725 | 39705745 | 4.04 |
| chr20 | 39714870 | 39715883 | 3.36 |
| chr20 | 39723736 | 39724522 | 4.04 |
| chr20 | 39734523 | 39735770 | 5.05 |
| chr20 | 39739161 | 39740167 | 4.04 |
| chr20 | 39743031 | 39744747 | 3.36 |
| chr20 | 39747513 | 39749131 | 3.7  |
| chr20 | 39749781 | 39750995 | 4.37 |
| chr20 | 39753102 | 39754019 | 3.7  |
| chr20 | 39754271 | 39755200 | 3.7  |
| chr20 | 39760034 | 39760713 | 3.36 |
| chr20 | 39762163 | 39768274 | 4.71 |
| chr20 | 39768517 | 39772176 | 4.37 |
| chr20 | 39774871 | 39776211 | 5.38 |
| chr20 | 39777358 | 39778469 | 4.71 |
| chr20 | 39780966 | 39782061 | 3.36 |
| chr20 | 39798704 | 39800079 | 4.37 |
| chr20 | 39801777 | 39803413 | 2.69 |

|       |          |          |       |
|-------|----------|----------|-------|
| chr20 | 39807211 | 39809335 | 3.7   |
| chr20 | 39813726 | 39814757 | 3.36  |
| chr20 | 39817285 | 39822154 | 4.71  |
| chr20 | 39826496 | 39827928 | 5.05  |
| chr20 | 39832744 | 39834150 | 4.04  |
| chr20 | 39842640 | 39843793 | 3.7   |
| chr20 | 39854961 | 39855952 | 2.35  |
| chr20 | 39896882 | 39898290 | 3.36  |
| chr20 | 39904028 | 39905494 | 3.03  |
| chr20 | 39909786 | 39910659 | 3.03  |
| chr20 | 39913392 | 39916603 | 6.73  |
| chr20 | 39918217 | 39920279 | 5.38  |
| chr20 | 39944923 | 39947853 | 4.71  |
| chr20 | 39962692 | 39963627 | 3.36  |
| chr20 | 39967765 | 39971000 | 3.7   |
| chr20 | 39972641 | 39974620 | 5.38  |
| chr20 | 39982555 | 39983505 | 2.02  |
| chr20 | 39986276 | 39987360 | 3.7   |
| chr20 | 39999293 | 40000869 | 6.39  |
| chr20 | 40019851 | 40023014 | 5.05  |
| chr20 | 40026224 | 40027699 | 4.04  |
| chr20 | 40031335 | 40032663 | 2.35  |
| chr20 | 40039829 | 40040764 | 3.03  |
| chr20 | 40053794 | 40054786 | 2.35  |
| chr20 | 40087051 | 40087803 | 4.04  |
| chr20 | 40088472 | 40089553 | 3.7   |
| chr20 | 40104222 | 40105665 | 6.05  |
| chr20 | 40153651 | 40154748 | 3.7   |
| chr20 | 40165002 | 40166832 | 4.04  |
| chr20 | 40197220 | 40198061 | 2.69  |
| chr20 | 40203227 | 40204700 | 3.36  |
| chr20 | 40211234 | 40217727 | 7.4   |
| chr20 | 40220842 | 40230863 | 18.16 |
| chr20 | 40235422 | 40236841 | 3.7   |
| chr20 | 40244707 | 40249090 | 4.37  |
| chr20 | 40272364 | 40273354 | 3.36  |
| chr20 | 40274105 | 40275265 | 4.04  |
| chr20 | 40277521 | 40281197 | 5.05  |
| chr20 | 40283220 | 40284877 | 4.04  |
| chr20 | 40293044 | 40294753 | 3.7   |
| chr20 | 40316628 | 40317886 | 4.04  |
| chr20 | 40320928 | 40323627 | 6.73  |
| chr20 | 40330037 | 40332800 | 4.04  |

|       |          |          |      |
|-------|----------|----------|------|
| chr20 | 40337028 | 40338357 | 3.7  |
| chr20 | 40340429 | 40341467 | 3.36 |
| chr20 | 40351437 | 40352632 | 4.04 |
| chr20 | 40353727 | 40354852 | 4.71 |
| chr20 | 40355217 | 40357598 | 4.37 |
| chr20 | 40368398 | 40369304 | 2.69 |
| chr20 | 40372699 | 40373643 | 3.7  |
| chr20 | 40443341 | 40444430 | 3.7  |
| chr20 | 40468580 | 40469710 | 3.7  |
| chr20 | 40474275 | 40475396 | 4.04 |
| chr20 | 40496938 | 40499483 | 4.04 |
| chr20 | 40551897 | 40552969 | 2.69 |
| chr20 | 40564824 | 40565721 | 3.03 |
| chr20 | 40569358 | 40570216 | 2.35 |
| chr20 | 40570874 | 40572096 | 4.04 |
| chr20 | 40578538 | 40579465 | 1.68 |
| chr20 | 40579822 | 40580690 | 3.7  |
| chr20 | 40601833 | 40602838 | 3.36 |
| chr20 | 40604393 | 40605917 | 3.36 |
| chr20 | 40622073 | 40622954 | 3.7  |
| chr20 | 40638235 | 40640283 | 5.72 |
| chr20 | 40666736 | 40667862 | 4.04 |
| chr20 | 40675910 | 40677417 | 3.36 |
| chr20 | 40765994 | 40767038 | 2.02 |
| chr20 | 40772090 | 40773008 | 2.02 |
| chr20 | 40806600 | 40807720 | 3.7  |
| chr20 | 40808182 | 40809253 | 3.36 |
| chr20 | 40815172 | 40835238 | 7.74 |
| chr20 | 41003086 | 41014312 | 6.05 |
| chr20 | 41014525 | 41016663 | 4.04 |
| chr20 | 41017443 | 41018767 | 6.39 |
| chr20 | 41077271 | 41078447 | 4.37 |
| chr20 | 41079327 | 41080609 | 3.7  |
| chr20 | 41083447 | 41086153 | 5.05 |
| chr20 | 41090283 | 41091501 | 4.37 |
| chr20 | 41097976 | 41099679 | 4.37 |
| chr20 | 41103564 | 41107100 | 3.7  |
| chr20 | 41109428 | 41113908 | 4.71 |
| chr20 | 41124741 | 41126386 | 4.04 |
| chr20 | 41131429 | 41132951 | 3.03 |
| chr20 | 41134844 | 41135968 | 4.04 |
| chr20 | 41138203 | 41139780 | 3.36 |
| chr20 | 41141773 | 41144075 | 4.37 |

|       |          |          |       |
|-------|----------|----------|-------|
| chr20 | 41144759 | 41145957 | 6.73  |
| chr20 | 41147183 | 41148104 | 4.04  |
| chr20 | 41158618 | 41161089 | 4.71  |
| chr20 | 41163348 | 41165689 | 4.37  |
| chr20 | 41167339 | 41169060 | 4.04  |
| chr20 | 41178117 | 41179151 | 3.36  |
| chr20 | 41180091 | 41181554 | 5.72  |
| chr20 | 41186725 | 41190193 | 5.05  |
| chr20 | 41194007 | 41196693 | 4.37  |
| chr20 | 41197878 | 41205556 | 6.39  |
| chr20 | 41206178 | 41207480 | 4.37  |
| chr20 | 41209961 | 41211184 | 4.71  |
| chr20 | 41211650 | 41212814 | 3.7   |
| chr20 | 41221096 | 41222063 | 3.36  |
| chr20 | 41225693 | 41227870 | 4.04  |
| chr20 | 42437700 | 42438771 | 5.05  |
| chr20 | 43324575 | 43325526 | 2.02  |
| chr20 | 43357350 | 43358062 | 4.04  |
| chr20 | 43863147 | 43864079 | 3.36  |
| chr20 | 43970549 | 43971766 | 3.7   |
| chr20 | 44028504 | 44030178 | 5.38  |
| chr20 | 44407392 | 44408543 | 3.7   |
| chr20 | 44599705 | 44601371 | 4.04  |
| chr20 | 44621658 | 44623140 | 5.05  |
| chr20 | 45081666 | 45082633 | 3.03  |
| chr20 | 45084224 | 45086072 | 6.05  |
| chr20 | 45088243 | 45089264 | 3.03  |
| chr20 | 45129135 | 45133878 | 11.77 |
| chr20 | 45334550 | 45336131 | 3.7   |
| chr20 | 45522545 | 45523980 | 4.71  |
| chr20 | 45584412 | 45585787 | 5.72  |
| chr20 | 45592210 | 45593505 | 3.7   |
| chr20 | 45610642 | 45611565 | 4.71  |
| chr20 | 45631698 | 45632902 | 4.37  |
| chr20 | 45640136 | 45641276 | 4.37  |
| chr20 | 45695155 | 45699434 | 12.78 |
| chr20 | 45704932 | 45705957 | 3.7   |
| chr20 | 45723766 | 45725251 | 4.04  |
| chr20 | 45732341 | 45733417 | 3.36  |
| chr20 | 45736432 | 45738541 | 5.38  |
| chr20 | 45738762 | 45740696 | 4.71  |
| chr20 | 45746147 | 45747115 | 4.37  |
| chr20 | 45769396 | 45772552 | 21.53 |



|       |          |          |       |
|-------|----------|----------|-------|
| chr20 | 45777687 | 45779786 | 16.15 |
| chr20 | 45784922 | 45788878 | 17.49 |
| chr20 | 45796052 | 46182718 | 81.73 |
| chr20 | 46183194 | 46456111 | 26.91 |
| chr20 | 46462264 | 46463032 | 3.7   |
| chr20 | 46466516 | 46519392 | 19.17 |
| chr20 | 46520531 | 46521687 | 4.04  |
| chr20 | 46523302 | 46525410 | 24.22 |
| chr20 | 46525961 | 46527043 | 4.37  |
| chr20 | 46532921 | 46996909 | 38.34 |
| chr20 | 46997303 | 47122852 | 11.77 |
| chr20 | 47125125 | 47133516 | 29.94 |
| chr20 | 47133922 | 47204190 | 25.9  |
| chr20 | 47207971 | 47487386 | 17.49 |
| chr20 | 47488559 | 47541103 | 13.12 |
| chr20 | 47803214 | 47805024 | 4.37  |
| chr20 | 47826378 | 47827434 | 4.04  |
| chr20 | 47892814 | 47893922 | 3.36  |
| chr20 | 47894814 | 47899984 | 8.41  |
| chr20 | 47901914 | 47904680 | 4.71  |
| chr20 | 47905186 | 47906273 | 3.7   |
| chr20 | 47936688 | 47937617 | 3.36  |
| chr20 | 47941129 | 47942564 | 4.04  |
| chr20 | 48036989 | 48038140 | 4.71  |
| chr20 | 48063182 | 48064000 | 3.36  |
| chr20 | 48118107 | 48118928 | 3.7   |
| chr20 | 48162203 | 48163189 | 3.7   |
| chr20 | 48171463 | 48173750 | 7.4   |
| chr20 | 48200500 | 48201587 | 3.7   |
| chr20 | 48224590 | 48226089 | 3.36  |
| chr20 | 48241629 | 48242730 | 3.36  |
| chr20 | 48384571 | 48385451 | 3.36  |
| chr20 | 48475905 | 48477191 | 6.39  |
| chr20 | 48496556 | 48498373 | 4.04  |
| chr20 | 48498584 | 48500697 | 4.04  |
| chr20 | 48503147 | 48506575 | 6.05  |
| chr20 | 48507036 | 48508873 | 3.7   |
| chr20 | 48509639 | 48510712 | 4.37  |
| chr20 | 48512623 | 48514786 | 4.37  |
| chr20 | 48515616 | 48517377 | 6.05  |
| chr20 | 48520959 | 48521815 | 3.7   |
| chr20 | 48524131 | 48526280 | 4.04  |
| chr20 | 48526524 | 48527531 | 3.36  |

|       |          |          |      |
|-------|----------|----------|------|
| chr20 | 48529744 | 48533944 | 7.06 |
| chr20 | 48534653 | 48537899 | 5.72 |
| chr20 | 48541976 | 48543295 | 4.37 |
| chr20 | 48544918 | 48546407 | 7.4  |
| chr20 | 48551423 | 48556509 | 6.73 |
| chr20 | 48557842 | 48559109 | 3.7  |
| chr20 | 48561420 | 48563266 | 3.7  |
| chr20 | 48564950 | 48566392 | 4.04 |
| chr20 | 48568218 | 48570793 | 4.04 |
| chr20 | 48580852 | 48582899 | 6.39 |
| chr20 | 48583279 | 48585935 | 4.37 |
| chr20 | 48586281 | 48587935 | 4.04 |
| chr20 | 48589348 | 48591166 | 4.37 |
| chr20 | 48594081 | 48603250 | 8.07 |
| chr20 | 48605303 | 48607494 | 4.37 |
| chr20 | 48613860 | 48615461 | 4.37 |
| chr20 | 48617559 | 48618808 | 5.38 |
| chr20 | 48619572 | 48620665 | 4.37 |
| chr20 | 48626158 | 48627687 | 3.7  |
| chr20 | 48628542 | 48629253 | 4.04 |
| chr20 | 48630455 | 48631857 | 4.37 |
| chr20 | 48633683 | 48634761 | 2.69 |
| chr20 | 48635567 | 48638244 | 7.06 |
| chr20 | 48639053 | 48640785 | 4.71 |
| chr20 | 48643726 | 48644744 | 5.05 |
| chr20 | 48645379 | 48647641 | 5.38 |
| chr20 | 48648904 | 48650363 | 5.05 |
| chr20 | 48653129 | 48658614 | 5.05 |
| chr20 | 48659044 | 48659883 | 3.36 |
| chr20 | 48662806 | 48666273 | 4.37 |
| chr20 | 48669860 | 48671549 | 3.7  |
| chr20 | 48680949 | 48682079 | 3.7  |
| chr20 | 48683717 | 48685087 | 5.05 |
| chr20 | 48687202 | 48688736 | 7.06 |
| chr20 | 48692889 | 48693707 | 4.04 |
| chr20 | 48697131 | 48698467 | 5.05 |
| chr20 | 48699323 | 48700272 | 3.36 |
| chr20 | 48701525 | 48705249 | 6.05 |
| chr20 | 48706565 | 48707417 | 4.04 |
| chr20 | 48711672 | 48712705 | 4.04 |
| chr20 | 48716449 | 48719240 | 4.37 |
| chr20 | 48723261 | 48733577 | 7.4  |
| chr20 | 48734592 | 48742110 | 6.05 |

|       |          |          |      |
|-------|----------|----------|------|
| chr20 | 48742455 | 48746508 | 6.05 |
| chr20 | 48748878 | 48750055 | 3.36 |
| chr20 | 48754216 | 48756078 | 5.38 |
| chr20 | 48757395 | 48764584 | 6.05 |
| chr20 | 48764796 | 48772879 | 7.74 |
| chr20 | 48774154 | 48777539 | 5.72 |
| chr20 | 48778589 | 48781553 | 6.73 |
| chr20 | 48781902 | 48784358 | 6.73 |
| chr20 | 48784650 | 48788207 | 6.73 |
| chr20 | 48791297 | 48795328 | 4.37 |
| chr20 | 48797149 | 48798456 | 4.04 |
| chr20 | 48800220 | 48821752 | 7.74 |
| chr20 | 48821999 | 48823325 | 4.71 |
| chr20 | 48824292 | 48825544 | 3.7  |
| chr20 | 48831893 | 48832826 | 4.04 |
| chr20 | 48833137 | 48844035 | 5.38 |
| chr20 | 48845165 | 48846560 | 6.73 |
| chr20 | 48847150 | 48850352 | 4.71 |
| chr20 | 48851020 | 48865178 | 9.42 |
| chr20 | 48865427 | 48868484 | 5.05 |
| chr20 | 48872003 | 48875061 | 5.05 |
| chr20 | 48875894 | 48878097 | 4.04 |
| chr20 | 48879924 | 48885522 | 5.05 |
| chr20 | 48886646 | 48890026 | 4.04 |
| chr20 | 48892129 | 48903882 | 7.06 |
| chr20 | 48904323 | 48917071 | 6.39 |
| chr20 | 48917711 | 48960163 | 8.41 |
| chr20 | 48961005 | 48965402 | 5.38 |
| chr20 | 48969512 | 48978193 | 7.4  |
| chr20 | 48979386 | 48981381 | 4.37 |
| chr20 | 48983568 | 48986159 | 4.37 |
| chr20 | 48988030 | 48990395 | 4.37 |
| chr20 | 48990926 | 48992260 | 3.7  |
| chr20 | 48992842 | 48999629 | 7.4  |
| chr20 | 49001558 | 49003465 | 4.71 |
| chr20 | 49004330 | 49006596 | 4.71 |
| chr20 | 49007151 | 49008528 | 5.05 |
| chr20 | 49012480 | 49019606 | 5.05 |
| chr20 | 49019939 | 49022220 | 5.38 |
| chr20 | 49025159 | 49032385 | 6.39 |
| chr20 | 49032762 | 49044906 | 8.75 |
| chr20 | 49045321 | 49054325 | 9.08 |
| chr20 | 49055404 | 49060252 | 5.05 |

|       |          |          |      |
|-------|----------|----------|------|
| chr20 | 49061877 | 49064761 | 5.38 |
| chr20 | 49065550 | 49068586 | 5.05 |
| chr20 | 49069027 | 49071852 | 4.37 |
| chr20 | 49072558 | 49074612 | 4.04 |
| chr20 | 49076406 | 49079824 | 7.06 |
| chr20 | 49080068 | 49081873 | 5.05 |
| chr20 | 49082664 | 49085825 | 4.37 |
| chr20 | 49086094 | 49090794 | 5.38 |
| chr20 | 49091720 | 49095637 | 5.05 |
| chr20 | 49097842 | 49106427 | 5.72 |
| chr20 | 49107673 | 49112437 | 5.05 |
| chr20 | 49112970 | 49115184 | 4.04 |
| chr20 | 49115906 | 49117367 | 4.71 |
| chr20 | 49117995 | 49121340 | 5.38 |
| chr20 | 49121549 | 49123742 | 6.05 |
| chr20 | 49124280 | 49136401 | 5.72 |
| chr20 | 49144003 | 49145024 | 3.36 |
| chr20 | 49145315 | 49146443 | 4.71 |
| chr20 | 49147100 | 49150166 | 5.05 |
| chr20 | 49150607 | 49156482 | 5.05 |
| chr20 | 49157569 | 49160404 | 4.37 |
| chr20 | 49162318 | 49167795 | 4.37 |
| chr20 | 49168459 | 49178631 | 5.72 |
| chr20 | 49180076 | 49191544 | 5.72 |
| chr20 | 49192137 | 49194558 | 4.37 |
| chr20 | 49195986 | 49197302 | 3.36 |
| chr20 | 49198386 | 49208311 | 7.74 |
| chr20 | 49208561 | 49209984 | 3.36 |
| chr20 | 49212007 | 49213719 | 3.36 |
| chr20 | 49214939 | 49217510 | 4.71 |
| chr20 | 49217762 | 49220451 | 5.72 |
| chr20 | 49220658 | 49223063 | 4.37 |
| chr20 | 49224259 | 49225946 | 4.04 |
| chr20 | 49226449 | 49228104 | 3.7  |
| chr20 | 49228370 | 49229753 | 4.71 |
| chr20 | 49230923 | 49233028 | 4.37 |
| chr20 | 49233711 | 49235651 | 4.04 |
| chr20 | 49236853 | 49240088 | 5.05 |
| chr20 | 49240487 | 49245980 | 8.41 |
| chr20 | 49249628 | 49254172 | 7.4  |
| chr20 | 49258007 | 49259761 | 7.06 |
| chr20 | 49260602 | 49263842 | 7.06 |
| chr20 | 49265778 | 49268465 | 4.71 |

|       |          |          |       |
|-------|----------|----------|-------|
| chr20 | 49269017 | 49271639 | 5.05  |
| chr20 | 49271860 | 49274153 | 10.43 |
| chr20 | 49274374 | 49281451 | 7.4   |
| chr20 | 49282772 | 49433388 | 42.04 |
| chr20 | 49434064 | 49436165 | 4.71  |
| chr20 | 49440409 | 49441770 | 4.37  |
| chr20 | 49442431 | 49443347 | 5.72  |
| chr20 | 49464814 | 49466328 | 3.7   |
| chr20 | 49471519 | 49473317 | 4.04  |
| chr20 | 49513416 | 49514541 | 4.04  |
| chr20 | 49516448 | 49517694 | 3.7   |
| chr20 | 49519184 | 49520838 | 4.04  |
| chr20 | 49525744 | 49526700 | 3.36  |
| chr20 | 49526930 | 49527779 | 4.04  |
| chr20 | 49533183 | 49534121 | 3.36  |
| chr20 | 49534643 | 49536307 | 4.04  |
| chr20 | 49540747 | 49541801 | 3.03  |
| chr20 | 49544569 | 49549305 | 5.72  |
| chr20 | 49564141 | 49565264 | 3.36  |
| chr20 | 49570435 | 49571299 | 3.03  |
| chr20 | 49574017 | 49576814 | 5.38  |
| chr20 | 49577980 | 49579120 | 3.7   |
| chr20 | 49579379 | 49580499 | 4.04  |
| chr20 | 49582644 | 49583929 | 3.7   |
| chr20 | 49588009 | 49588834 | 4.37  |
| chr20 | 49593374 | 49595229 | 4.37  |
| chr20 | 49597619 | 49599823 | 4.71  |
| chr20 | 49609694 | 49610751 | 4.37  |
| chr20 | 49611774 | 49613230 | 3.7   |
| chr20 | 49631049 | 49632370 | 4.04  |
| chr20 | 49633015 | 49633892 | 3.36  |
| chr20 | 49637674 | 49639420 | 4.04  |
| chr20 | 49640242 | 49641713 | 3.7   |
| chr20 | 49645081 | 49646422 | 3.7   |
| chr20 | 49662469 | 49663699 | 4.37  |
| chr20 | 49667814 | 49668628 | 3.36  |
| chr20 | 49672448 | 49673424 | 4.04  |
| chr20 | 49683504 | 49684719 | 4.71  |
| chr20 | 49687773 | 49689257 | 4.04  |
| chr20 | 49698442 | 49699699 | 4.04  |
| chr20 | 49711522 | 49712767 | 4.37  |
| chr20 | 49725297 | 49726324 | 4.04  |
| chr20 | 49737907 | 49740095 | 4.71  |

|       |          |          |      |
|-------|----------|----------|------|
| chr20 | 49742772 | 49744170 | 3.7  |
| chr20 | 49750486 | 49751305 | 4.04 |
| chr20 | 49757714 | 49762658 | 4.37 |
| chr20 | 49767693 | 49768740 | 4.37 |
| chr20 | 49771118 | 49773062 | 4.71 |
| chr20 | 49775562 | 49779450 | 7.06 |
| chr20 | 49784541 | 49786764 | 5.05 |
| chr20 | 49787646 | 49790410 | 5.38 |
| chr20 | 49791075 | 49793186 | 4.71 |
| chr20 | 49799348 | 49800774 | 3.36 |
| chr20 | 49808454 | 49810161 | 4.71 |
| chr20 | 49811771 | 49812611 | 3.7  |
| chr20 | 49813253 | 49815217 | 5.38 |
| chr20 | 49817317 | 49818132 | 3.03 |
| chr20 | 49818649 | 49820063 | 3.7  |
| chr20 | 49821617 | 49822552 | 2.35 |
| chr20 | 49827503 | 49829155 | 4.04 |
| chr20 | 49830882 | 49832063 | 5.05 |
| chr20 | 49832349 | 49841156 | 6.05 |
| chr20 | 49842686 | 49844734 | 3.7  |
| chr20 | 49855164 | 49860651 | 7.06 |
| chr20 | 49862349 | 49863456 | 3.36 |
| chr20 | 49863831 | 49865230 | 3.36 |
| chr20 | 49866814 | 49871072 | 5.05 |
| chr20 | 49871350 | 49875038 | 5.05 |
| chr20 | 49875420 | 49877418 | 4.37 |
| chr20 | 49878202 | 49880388 | 4.71 |
| chr20 | 49880853 | 49883551 | 4.71 |
| chr20 | 49883945 | 49888747 | 4.37 |
| chr20 | 49889345 | 49890447 | 4.04 |
| chr20 | 49892424 | 49894867 | 4.04 |
| chr20 | 49896576 | 49900728 | 4.71 |
| chr20 | 49905383 | 49906749 | 4.04 |
| chr20 | 49907888 | 49909326 | 4.04 |
| chr20 | 49910311 | 49912072 | 4.37 |
| chr20 | 49912345 | 49913332 | 3.7  |
| chr20 | 49913718 | 49926988 | 7.4  |
| chr20 | 49927799 | 49930789 | 6.73 |
| chr20 | 49932405 | 49936825 | 4.37 |
| chr20 | 49939044 | 49940872 | 4.04 |
| chr20 | 49941393 | 49943474 | 4.37 |
| chr20 | 49944015 | 49945230 | 4.04 |
| chr20 | 49946694 | 49948118 | 3.7  |

|       |          |          |      |
|-------|----------|----------|------|
| chr20 | 49958608 | 49962150 | 6.05 |
| chr20 | 49962404 | 49963254 | 3.7  |
| chr20 | 49963701 | 49965396 | 4.37 |
| chr20 | 49970185 | 49971432 | 4.37 |
| chr20 | 49971640 | 49973072 | 4.71 |
| chr20 | 49980139 | 49981102 | 3.7  |
| chr20 | 49982487 | 49983472 | 4.04 |
| chr20 | 50000160 | 50001660 | 4.04 |
| chr20 | 50006630 | 50008188 | 4.04 |
| chr20 | 50014713 | 50017239 | 6.05 |
| chr20 | 50018533 | 50021567 | 4.04 |
| chr20 | 50022638 | 50023395 | 3.7  |
| chr20 | 50026928 | 50028243 | 6.05 |
| chr20 | 50038339 | 50039344 | 4.37 |
| chr20 | 50040061 | 50042198 | 5.38 |
| chr20 | 50053314 | 50054204 | 3.36 |
| chr20 | 50058911 | 50060724 | 4.04 |
| chr20 | 50062571 | 50065074 | 6.73 |
| chr20 | 50066706 | 50072238 | 7.06 |
| chr20 | 50072620 | 50074408 | 6.39 |
| chr20 | 50076895 | 50078769 | 4.71 |
| chr20 | 50086982 | 50088129 | 4.04 |
| chr20 | 50094109 | 50097690 | 5.38 |
| chr20 | 50100692 | 50102144 | 3.36 |
| chr20 | 50103738 | 50104730 | 4.04 |
| chr20 | 50106092 | 50107463 | 3.7  |
| chr20 | 50117396 | 50118981 | 4.71 |
| chr20 | 50123321 | 50124861 | 3.36 |
| chr20 | 50138872 | 50139982 | 4.04 |
| chr20 | 50149128 | 50149987 | 2.35 |
| chr20 | 50151038 | 50155635 | 4.37 |
| chr20 | 50157688 | 50160317 | 5.72 |
| chr20 | 50160844 | 50161762 | 4.37 |
| chr20 | 50162615 | 50164447 | 4.04 |
| chr20 | 50166004 | 50166845 | 3.7  |
| chr20 | 50170201 | 50171916 | 5.05 |
| chr20 | 50173741 | 50177600 | 4.37 |
| chr20 | 50178208 | 50181439 | 5.05 |
| chr20 | 50181990 | 50183019 | 3.36 |
| chr20 | 50185106 | 50188203 | 4.04 |
| chr20 | 50189651 | 50194468 | 4.71 |
| chr20 | 50195581 | 50200846 | 5.05 |
| chr20 | 50203247 | 50204272 | 4.04 |

|       |          |          |      |
|-------|----------|----------|------|
| chr20 | 50207682 | 50209176 | 3.7  |
| chr20 | 50209674 | 50212525 | 5.38 |
| chr20 | 50212784 | 50213948 | 3.7  |
| chr20 | 50214815 | 50215630 | 3.03 |
| chr20 | 50216189 | 50217646 | 3.36 |
| chr20 | 50221136 | 50221856 | 2.69 |
| chr20 | 50222678 | 50224329 | 3.7  |
| chr20 | 50229635 | 50231530 | 3.36 |
| chr20 | 50236435 | 50238598 | 5.38 |
| chr20 | 50240207 | 50243137 | 5.05 |
| chr20 | 50254614 | 50257703 | 5.05 |
| chr20 | 50259117 | 50260595 | 4.04 |
| chr20 | 50261946 | 50263335 | 3.7  |
| chr20 | 50264065 | 50265785 | 4.37 |
| chr20 | 50268254 | 50274846 | 5.38 |
| chr20 | 50276098 | 50278918 | 4.37 |
| chr20 | 50281485 | 50282964 | 3.7  |
| chr20 | 50283300 | 50284626 | 4.71 |
| chr20 | 50285067 | 50287909 | 5.38 |
| chr20 | 50289022 | 50289825 | 3.03 |
| chr20 | 50291825 | 50293265 | 4.04 |
| chr20 | 50293632 | 50298063 | 4.71 |
| chr20 | 50304652 | 50306115 | 4.04 |
| chr20 | 50306721 | 50316371 | 8.07 |
| chr20 | 50316878 | 50324606 | 7.06 |
| chr20 | 50325875 | 50330003 | 5.38 |
| chr20 | 50330852 | 50336179 | 6.73 |
| chr20 | 50336405 | 50338334 | 5.72 |
| chr20 | 50338702 | 50343021 | 8.07 |
| chr20 | 50345883 | 50357541 | 7.4  |
| chr20 | 50357989 | 50370503 | 9.08 |
| chr20 | 50371575 | 50378541 | 5.38 |
| chr20 | 50379204 | 50381719 | 5.05 |
| chr20 | 50382464 | 50388195 | 9.75 |
| chr20 | 50388639 | 50401519 | 5.72 |
| chr20 | 50402775 | 50404641 | 5.38 |
| chr20 | 50405121 | 50433970 | 7.06 |
| chr20 | 50436047 | 50438194 | 4.71 |
| chr20 | 50439912 | 50444484 | 5.38 |
| chr20 | 50444767 | 50445551 | 3.7  |
| chr20 | 50446035 | 50450617 | 5.72 |
| chr20 | 50451556 | 50453217 | 5.05 |
| chr20 | 50453716 | 50455086 | 4.71 |



|       |          |          |      |
|-------|----------|----------|------|
| chr20 | 50455310 | 50456416 | 5.05 |
| chr20 | 50457488 | 50463297 | 5.38 |
| chr20 | 50463714 | 50468512 | 4.71 |
| chr20 | 50468812 | 50474442 | 5.72 |
| chr20 | 50474800 | 50484656 | 7.06 |
| chr20 | 50484872 | 50491359 | 5.38 |
| chr20 | 50492511 | 50495160 | 4.71 |
| chr20 | 50496322 | 50497580 | 4.04 |
| chr20 | 50498041 | 50499884 | 4.04 |
| chr20 | 50500717 | 50501747 | 4.37 |
| chr20 | 50501997 | 50513291 | 6.39 |
| chr20 | 50513861 | 50525353 | 5.38 |
| chr20 | 50526113 | 50544400 | 7.4  |
| chr20 | 50546501 | 50548484 | 5.38 |
| chr20 | 50549011 | 50552945 | 5.72 |
| chr20 | 50554252 | 50556719 | 5.38 |
| chr20 | 50560055 | 50563455 | 4.37 |
| chr20 | 50563760 | 50569209 | 4.71 |
| chr20 | 50569732 | 50571176 | 4.37 |
| chr20 | 50572005 | 50573706 | 5.05 |
| chr20 | 50574111 | 50577467 | 4.71 |
| chr20 | 50578211 | 50583978 | 7.4  |
| chr20 | 50584192 | 50585414 | 4.37 |
| chr20 | 50585983 | 50589117 | 4.37 |
| chr20 | 50592566 | 50596840 | 6.39 |
| chr20 | 50597190 | 50598630 | 3.7  |
| chr20 | 50599277 | 50602406 | 5.72 |
| chr20 | 50602992 | 50607284 | 4.71 |
| chr20 | 50608871 | 50610600 | 5.38 |
| chr20 | 50611019 | 50614615 | 4.71 |
| chr20 | 50617696 | 50620449 | 7.4  |
| chr20 | 50621374 | 50622139 | 4.37 |
| chr20 | 50626775 | 50629743 | 4.37 |
| chr20 | 50637095 | 50637923 | 3.7  |
| chr20 | 50649616 | 50650453 | 4.37 |
| chr20 | 50703227 | 50704178 | 3.7  |
| chr20 | 50807482 | 50808791 | 4.37 |
| chr20 | 51121773 | 51123085 | 5.05 |
| chr20 | 51932758 | 51934298 | 3.36 |
| chr20 | 51947708 | 51948868 | 4.04 |
| chr20 | 51962552 | 51963527 | 3.7  |
| chr20 | 52032308 | 52033231 | 4.04 |
| chr20 | 52039686 | 52041236 | 4.37 |

|       |          |          |       |
|-------|----------|----------|-------|
| chr20 | 52041703 | 52043209 | 5.38  |
| chr20 | 52053093 | 52055189 | 4.71  |
| chr20 | 52063520 | 52068441 | 4.37  |
| chr20 | 52068836 | 52072250 | 5.72  |
| chr20 | 52078073 | 52082095 | 6.05  |
| chr20 | 52083033 | 52085435 | 3.7   |
| chr20 | 52086271 | 52088234 | 4.71  |
| chr20 | 52110895 | 52112444 | 4.37  |
| chr20 | 52118752 | 52119746 | 4.37  |
| chr20 | 52126225 | 52133467 | 6.39  |
| chr20 | 52137576 | 52138509 | 4.71  |
| chr20 | 52181290 | 52471233 | 46.42 |
| chr20 | 52471503 | 52849921 | 40.36 |
| chr20 | 52850510 | 52857441 | 15.81 |
| chr20 | 52857673 | 52866482 | 12.45 |
| chr20 | 52867139 | 52991418 | 19.17 |
| chr20 | 52992159 | 53371995 | 28.25 |
| chr20 | 53372782 | 53399694 | 14.13 |
| chr20 | 53404696 | 53427569 | 13.12 |
| chr20 | 53429360 | 53492338 | 13.79 |
| chr20 | 53493056 | 53500075 | 11.1  |
| chr20 | 53500423 | 53550559 | 15.47 |
| chr20 | 53551159 | 53557977 | 11.44 |
| chr20 | 53575775 | 53576953 | 3.36  |
| chr20 | 53596468 | 53597482 | 3.7   |
| chr20 | 53649453 | 53650301 | 3.36  |
| chr20 | 53652516 | 53654126 | 5.05  |
| chr20 | 53672958 | 53675078 | 4.37  |
| chr20 | 53732213 | 53733591 | 3.36  |
| chr20 | 53735130 | 53736011 | 3.36  |
| chr20 | 53737546 | 53738411 | 3.03  |
| chr20 | 53748517 | 53750334 | 4.37  |
| chr20 | 53758949 | 53760275 | 5.05  |
| chr20 | 53797546 | 53798380 | 3.36  |
| chr20 | 53842837 | 53843836 | 3.36  |
| chr20 | 53874546 | 53876129 | 3.36  |
| chr20 | 53882453 | 53883563 | 3.7   |
| chr20 | 53885858 | 53886653 | 2.69  |
| chr20 | 53912041 | 53913426 | 4.04  |
| chr20 | 53915710 | 53918073 | 3.7   |
| chr20 | 53922161 | 53923227 | 4.71  |
| chr20 | 53927582 | 53928755 | 3.7   |
| chr20 | 53933839 | 53935472 | 4.37  |

|       |          |          |       |
|-------|----------|----------|-------|
| chr20 | 53937388 | 53938261 | 3.36  |
| chr20 | 53938630 | 53940096 | 3.7   |
| chr20 | 53943476 | 53944902 | 3.36  |
| chr20 | 53948444 | 53950612 | 3.7   |
| chr20 | 53959321 | 53960539 | 4.04  |
| chr20 | 53961627 | 53962433 | 3.03  |
| chr20 | 53963782 | 53965575 | 3.7   |
| chr20 | 53975138 | 53976497 | 4.04  |
| chr20 | 53979338 | 53980905 | 3.36  |
| chr20 | 53984846 | 53986283 | 5.38  |
| chr20 | 54000277 | 54001691 | 4.04  |
| chr20 | 54008035 | 54009265 | 3.7   |
| chr20 | 54014432 | 54016172 | 4.71  |
| chr20 | 54016373 | 54017248 | 4.37  |
| chr20 | 54024600 | 54025935 | 5.38  |
| chr20 | 54029241 | 54031102 | 4.37  |
| chr20 | 54033804 | 54034756 | 3.36  |
| chr20 | 54038148 | 54043094 | 5.38  |
| chr20 | 54062830 | 54063648 | 4.71  |
| chr20 | 54087087 | 54089316 | 3.7   |
| chr20 | 54092445 | 54093906 | 3.7   |
| chr20 | 54099718 | 54100456 | 2.02  |
| chr20 | 54101630 | 54103180 | 4.04  |
| chr20 | 54105439 | 54106451 | 3.7   |
| chr20 | 54120952 | 54122377 | 4.04  |
| chr20 | 54151307 | 54161766 | 19.51 |
| chr20 | 54183660 | 54184367 | 1.35  |
| chr20 | 54337936 | 54338891 | 3.36  |
| chr20 | 54352972 | 54353944 | 3.7   |
| chr20 | 54359264 | 54360202 | 3.36  |
| chr20 | 54361402 | 54362278 | 3.36  |
| chr20 | 54486089 | 54486908 | 3.36  |
| chr20 | 54495623 | 54497979 | 4.71  |
| chr20 | 54560741 | 54561609 | 4.04  |
| chr20 | 54573458 | 54574808 | 4.71  |
| chr20 | 54579935 | 54581121 | 3.7   |
| chr20 | 54593058 | 54594088 | 3.36  |
| chr20 | 54594434 | 54595561 | 4.37  |
| chr20 | 54606263 | 54608288 | 10.09 |
| chr20 | 54608680 | 54609889 | 4.37  |
| chr20 | 54620124 | 54621001 | 2.69  |
| chr20 | 54665797 | 54666910 | 4.04  |
| chr20 | 54667376 | 54668297 | 4.04  |

|       |          |          |      |
|-------|----------|----------|------|
| chr20 | 54702367 | 54703283 | 3.36 |
| chr20 | 54715981 | 54718290 | 4.71 |
| chr20 | 54737050 | 54737905 | 3.03 |
| chr20 | 54747988 | 54749281 | 4.04 |
| chr20 | 54756323 | 54757507 | 4.04 |
| chr20 | 54772927 | 54774390 | 4.04 |
| chr20 | 54774852 | 54776824 | 3.7  |
| chr20 | 54780902 | 54781978 | 4.04 |
| chr20 | 54792160 | 54793051 | 3.7  |
| chr20 | 54794299 | 54796834 | 5.38 |
| chr20 | 54824170 | 54825466 | 4.37 |
| chr20 | 54827978 | 54829612 | 3.7  |
| chr20 | 54840056 | 54841530 | 3.36 |
| chr20 | 54871561 | 54872618 | 3.36 |
| chr20 | 54887223 | 54888537 | 4.37 |
| chr20 | 54888809 | 54890245 | 4.04 |
| chr20 | 54903388 | 54904435 | 3.7  |
| chr20 | 54906054 | 54908029 | 4.04 |
| chr20 | 54910281 | 54911861 | 5.05 |
| chr20 | 54917594 | 54919962 | 4.04 |
| chr20 | 54965984 | 54968301 | 3.7  |
| chr20 | 54973402 | 54974531 | 5.05 |
| chr20 | 54992679 | 54993783 | 3.7  |
| chr20 | 55012187 | 55013232 | 3.36 |
| chr20 | 55022254 | 55023020 | 3.7  |
| chr20 | 55025919 | 55027233 | 4.71 |
| chr20 | 55038932 | 55040285 | 3.7  |
| chr20 | 55046495 | 55047348 | 3.7  |
| chr20 | 55090507 | 55092742 | 4.37 |
| chr20 | 55093038 | 55098129 | 6.05 |
| chr20 | 55110489 | 55111721 | 5.05 |
| chr20 | 55116259 | 55117047 | 3.36 |
| chr20 | 55129491 | 55130797 | 4.37 |
| chr20 | 55141190 | 55142314 | 4.04 |
| chr20 | 55166798 | 55168499 | 3.7  |
| chr20 | 55181030 | 55182561 | 5.38 |
| chr20 | 55183624 | 55185657 | 4.04 |
| chr20 | 55202656 | 55207576 | 5.38 |
| chr20 | 55208490 | 55209319 | 3.36 |
| chr20 | 55213461 | 55214460 | 4.04 |
| chr20 | 55231028 | 55232214 | 4.37 |
| chr20 | 55257579 | 55259042 | 5.72 |
| chr20 | 55262767 | 55266028 | 4.71 |

|       |          |          |      |
|-------|----------|----------|------|
| chr20 | 55272517 | 55274082 | 3.36 |
| chr20 | 55286116 | 55287363 | 4.04 |
| chr20 | 55293827 | 55294722 | 4.04 |
| chr20 | 55297697 | 55298613 | 3.7  |
| chr20 | 55300545 | 55301384 | 3.7  |
| chr20 | 55308416 | 55311315 | 6.05 |
| chr20 | 55311951 | 55312739 | 3.36 |
| chr20 | 55314179 | 55316134 | 6.39 |
| chr20 | 55323616 | 55325204 | 4.37 |
| chr20 | 55325817 | 55328832 | 3.7  |
| chr20 | 55332984 | 55334939 | 5.72 |
| chr20 | 55335535 | 55336773 | 3.7  |
| chr20 | 55347106 | 55348115 | 3.03 |
| chr20 | 55353789 | 55355009 | 4.04 |
| chr20 | 55360652 | 55364502 | 6.73 |
| chr20 | 55368148 | 55369095 | 4.04 |
| chr20 | 55370923 | 55372254 | 4.04 |
| chr20 | 55372694 | 55375494 | 7.06 |
| chr20 | 55376688 | 55378371 | 4.71 |
| chr20 | 55378837 | 55381789 | 5.38 |
| chr20 | 55384130 | 55385604 | 4.37 |
| chr20 | 55386080 | 55394101 | 5.05 |
| chr20 | 55395185 | 55396842 | 4.37 |
| chr20 | 55400019 | 55401079 | 3.7  |
| chr20 | 55401451 | 55405491 | 5.72 |
| chr20 | 55407789 | 55411663 | 4.37 |
| chr20 | 55416440 | 55420495 | 4.71 |
| chr20 | 55425088 | 55426738 | 4.04 |
| chr20 | 55431720 | 55433569 | 6.39 |
| chr20 | 55434308 | 55437603 | 5.05 |
| chr20 | 55439137 | 55439941 | 3.36 |
| chr20 | 55441635 | 55443967 | 4.04 |
| chr20 | 55448184 | 55451273 | 5.05 |
| chr20 | 55452288 | 55453409 | 3.36 |
| chr20 | 55459736 | 55460706 | 3.36 |
| chr20 | 55467874 | 55469421 | 3.36 |
| chr20 | 55474424 | 55475868 | 4.71 |
| chr20 | 55477188 | 55478146 | 4.04 |
| chr20 | 55478625 | 55479675 | 3.7  |
| chr20 | 55479909 | 55481150 | 4.71 |
| chr20 | 55483418 | 55486272 | 4.04 |
| chr20 | 55486951 | 55487818 | 3.7  |
| chr20 | 55489377 | 55490893 | 3.7  |

|       |          |          |       |
|-------|----------|----------|-------|
| chr20 | 55491411 | 55492273 | 3.03  |
| chr20 | 55496389 | 55499239 | 5.05  |
| chr20 | 55500911 | 55503291 | 4.37  |
| chr20 | 55507616 | 55514259 | 6.73  |
| chr20 | 55514587 | 55517272 | 4.71  |
| chr20 | 55517673 | 55519214 | 3.7   |
| chr20 | 55521044 | 55522896 | 5.05  |
| chr20 | 55524520 | 55528466 | 4.71  |
| chr20 | 55529759 | 55531085 | 4.71  |
| chr20 | 55533781 | 55545633 | 5.38  |
| chr20 | 55545870 | 55547178 | 4.71  |
| chr20 | 55547876 | 55550904 | 5.38  |
| chr20 | 55551222 | 55552049 | 3.03  |
| chr20 | 55554757 | 55567235 | 8.07  |
| chr20 | 55567756 | 55576905 | 9.08  |
| chr20 | 55577282 | 55583591 | 5.38  |
| chr20 | 55584841 | 55585875 | 3.7   |
| chr20 | 55587272 | 55593123 | 5.72  |
| chr20 | 55594574 | 55596031 | 4.71  |
| chr20 | 55596356 | 55620441 | 8.75  |
| chr20 | 55620679 | 55632302 | 7.06  |
| chr20 | 55633002 | 55638802 | 6.05  |
| chr20 | 55639485 | 55640970 | 4.71  |
| chr20 | 55642889 | 55657886 | 7.4   |
| chr20 | 55658567 | 55660153 | 3.7   |
| chr20 | 55661440 | 55669407 | 5.72  |
| chr20 | 55670950 | 55672428 | 4.37  |
| chr20 | 55673281 | 55674174 | 3.7   |
| chr20 | 55674816 | 55855608 | 38.34 |
| chr20 | 55857070 | 55859550 | 4.37  |
| chr20 | 55862418 | 55870317 | 5.38  |
| chr20 | 55872341 | 55874270 | 4.04  |
| chr20 | 55874780 | 55884936 | 6.05  |
| chr20 | 55885370 | 55891133 | 5.38  |
| chr20 | 55891931 | 55899679 | 4.71  |
| chr20 | 55900205 | 55906557 | 8.41  |
| chr20 | 55906882 | 55908964 | 4.37  |
| chr20 | 55910961 | 55912836 | 4.04  |
| chr20 | 55914111 | 55915531 | 4.71  |
| chr20 | 55915816 | 55919093 | 3.7   |
| chr20 | 55920493 | 55923275 | 5.38  |
| chr20 | 55924196 | 55927774 | 5.05  |
| chr20 | 55928275 | 55932058 | 5.05  |

|       |          |          |      |
|-------|----------|----------|------|
| chr20 | 55934852 | 55937120 | 3.36 |
| chr20 | 55938460 | 55940403 | 4.71 |
| chr20 | 55943293 | 55944710 | 3.7  |
| chr20 | 55945864 | 55947095 | 4.37 |
| chr20 | 55952413 | 55953504 | 3.7  |
| chr20 | 55954191 | 55956088 | 3.36 |
| chr20 | 55956365 | 55957918 | 6.05 |
| chr20 | 55962434 | 55969683 | 5.05 |
| chr20 | 55970835 | 55973228 | 4.37 |
| chr20 | 55973823 | 55977473 | 5.38 |
| chr20 | 55980572 | 55981718 | 3.36 |
| chr20 | 55982148 | 55984317 | 5.05 |
| chr20 | 55984547 | 55985840 | 3.36 |
| chr20 | 55988419 | 55990633 | 4.71 |
| chr20 | 55991276 | 55994484 | 4.37 |
| chr20 | 55995272 | 55997604 | 5.05 |
| chr20 | 55998350 | 56002499 | 4.71 |
| chr20 | 56003239 | 56005087 | 4.04 |
| chr20 | 56006553 | 56016558 | 5.72 |
| chr20 | 56017659 | 56021745 | 4.71 |
| chr20 | 56022278 | 56025734 | 5.05 |
| chr20 | 56025997 | 56027327 | 5.72 |
| chr20 | 56028653 | 56029475 | 4.04 |
| chr20 | 56030027 | 56044185 | 6.39 |
| chr20 | 56044854 | 56051741 | 5.38 |
| chr20 | 56059635 | 56061345 | 4.04 |
| chr20 | 56062116 | 56065033 | 4.37 |
| chr20 | 56066303 | 56072676 | 5.38 |
| chr20 | 56073283 | 56074193 | 5.05 |
| chr20 | 56076305 | 56079140 | 5.38 |
| chr20 | 56079451 | 56085798 | 5.72 |
| chr20 | 56086800 | 56089720 | 4.71 |
| chr20 | 56090173 | 56091817 | 4.04 |
| chr20 | 56093299 | 56099702 | 4.71 |
| chr20 | 56101901 | 56105264 | 4.71 |
| chr20 | 56105708 | 56119838 | 7.4  |
| chr20 | 56120891 | 56129968 | 4.37 |
| chr20 | 56131598 | 56146405 | 5.05 |
| chr20 | 56146824 | 56153186 | 6.39 |
| chr20 | 56154656 | 56175100 | 5.72 |
| chr20 | 56175462 | 56178911 | 5.05 |
| chr20 | 56179491 | 56180426 | 3.7  |
| chr20 | 56184204 | 56186882 | 5.05 |

|       |          |          |      |
|-------|----------|----------|------|
| chr20 | 56189462 | 56190491 | 3.7  |
| chr20 | 56192199 | 56195027 | 4.71 |
| chr20 | 56196656 | 56202942 | 5.05 |
| chr20 | 56204714 | 56205906 | 4.37 |
| chr20 | 56206161 | 56207687 | 4.04 |
| chr20 | 56209310 | 56220992 | 5.38 |
| chr20 | 56221424 | 56222633 | 4.04 |
| chr20 | 56224274 | 56230180 | 4.04 |
| chr20 | 56230991 | 56231768 | 3.03 |
| chr20 | 56237795 | 56238919 | 3.36 |
| chr20 | 56247441 | 56251569 | 5.05 |
| chr20 | 56253471 | 56254854 | 3.7  |
| chr20 | 56255393 | 56257139 | 4.04 |
| chr20 | 56260465 | 56263886 | 4.04 |
| chr20 | 56264417 | 56266758 | 4.37 |
| chr20 | 56267221 | 56275240 | 5.72 |
| chr20 | 56277428 | 56287010 | 6.05 |
| chr20 | 56287495 | 56289247 | 3.7  |
| chr20 | 56289455 | 56296389 | 5.05 |
| chr20 | 56302431 | 56309994 | 4.71 |
| chr20 | 56310269 | 56316498 | 4.71 |
| chr20 | 56316782 | 56327436 | 6.73 |
| chr20 | 56328160 | 56329680 | 4.71 |
| chr20 | 56329985 | 56333983 | 7.06 |
| chr20 | 56335076 | 56341140 | 5.72 |
| chr20 | 56344416 | 56352211 | 6.05 |
| chr20 | 56352809 | 56355517 | 4.04 |
| chr20 | 56356019 | 56360768 | 4.04 |
| chr20 | 56361245 | 56364354 | 3.36 |
| chr20 | 56365104 | 56370058 | 4.37 |
| chr20 | 56370802 | 56371648 | 3.36 |
| chr20 | 56372643 | 56375280 | 4.71 |
| chr20 | 56378198 | 56379372 | 5.72 |
| chr20 | 56380333 | 56382535 | 4.04 |
| chr20 | 56382976 | 56387244 | 5.38 |
| chr20 | 56388662 | 56397601 | 5.38 |
| chr20 | 56399207 | 56401382 | 4.37 |
| chr20 | 56405972 | 56408845 | 3.7  |
| chr20 | 56410101 | 56411771 | 4.37 |
| chr20 | 56415682 | 56417381 | 4.04 |
| chr20 | 56418438 | 56422517 | 4.71 |
| chr20 | 56423243 | 56424165 | 4.37 |
| chr20 | 56425879 | 56426817 | 3.36 |



|       |          |          |      |
|-------|----------|----------|------|
| chr20 | 56430912 | 56433787 | 4.04 |
| chr20 | 56434130 | 56436739 | 5.05 |
| chr20 | 56437904 | 56439936 | 4.04 |
| chr20 | 56440382 | 56443905 | 4.37 |
| chr20 | 56444481 | 56445750 | 4.04 |
| chr20 | 56446224 | 56448659 | 4.71 |
| chr20 | 56451020 | 56458227 | 4.37 |
| chr20 | 56466144 | 56470794 | 5.38 |
| chr20 | 56471032 | 56473939 | 5.05 |
| chr20 | 56476294 | 56477972 | 3.36 |
| chr20 | 56479258 | 56481328 | 5.72 |
| chr20 | 56485128 | 56486603 | 4.37 |
| chr20 | 56486926 | 56488480 | 3.7  |
| chr20 | 56489571 | 56496245 | 4.71 |
| chr20 | 56497559 | 56498869 | 4.04 |
| chr20 | 56499450 | 56503219 | 7.74 |
| chr20 | 56503767 | 56513434 | 6.05 |
| chr20 | 56514336 | 56517240 | 4.71 |
| chr20 | 56520338 | 56523382 | 4.04 |
| chr20 | 56528651 | 56534738 | 5.38 |
| chr20 | 56537338 | 56539963 | 5.05 |
| chr20 | 56540206 | 56541641 | 3.36 |
| chr20 | 56541980 | 56546819 | 5.05 |
| chr20 | 56547456 | 56548480 | 3.7  |
| chr20 | 56548754 | 56551896 | 4.37 |
| chr20 | 56552134 | 56553092 | 4.04 |
| chr20 | 56554837 | 56557049 | 4.37 |
| chr20 | 56557949 | 56558928 | 3.7  |
| chr20 | 56560823 | 56576321 | 6.05 |
| chr20 | 56577734 | 56579494 | 3.7  |
| chr20 | 56582028 | 56584374 | 3.7  |
| chr20 | 56585156 | 56587208 | 5.05 |
| chr20 | 56587708 | 56589083 | 4.04 |
| chr20 | 56589298 | 56601236 | 4.71 |
| chr20 | 56601969 | 56607669 | 5.38 |
| chr20 | 56608074 | 56610658 | 4.71 |
| chr20 | 56610973 | 56616082 | 5.38 |
| chr20 | 56617197 | 56618707 | 4.71 |
| chr20 | 56619058 | 56620494 | 3.36 |
| chr20 | 56620860 | 56631114 | 8.75 |
| chr20 | 56631806 | 56635371 | 5.05 |
| chr20 | 56636712 | 56639914 | 4.71 |
| chr20 | 56643289 | 56645534 | 4.04 |

|       |          |          |      |
|-------|----------|----------|------|
| chr20 | 56647388 | 56653162 | 4.71 |
| chr20 | 56653794 | 56656068 | 3.7  |
| chr20 | 56656308 | 56658004 | 3.7  |
| chr20 | 56659246 | 56661719 | 4.04 |
| chr20 | 56661931 | 56668349 | 4.71 |
| chr20 | 56669784 | 56671491 | 4.04 |
| chr20 | 56674274 | 56676348 | 3.7  |
| chr20 | 56677421 | 56679849 | 4.71 |
| chr20 | 56680211 | 56685199 | 5.05 |
| chr20 | 56685976 | 56689861 | 4.37 |
| chr20 | 56690203 | 56697856 | 5.72 |
| chr20 | 56699318 | 56702190 | 4.71 |
| chr20 | 56702749 | 56714915 | 5.38 |
| chr20 | 56715144 | 56726271 | 5.38 |
| chr20 | 56730087 | 56733192 | 4.71 |
| chr20 | 56733709 | 56737478 | 4.04 |
| chr20 | 56739417 | 56743696 | 4.71 |
| chr20 | 56744570 | 56747064 | 3.7  |
| chr20 | 56749140 | 56751363 | 4.71 |
| chr20 | 56752376 | 56755642 | 4.37 |
| chr20 | 56756530 | 56762374 | 7.4  |
| chr20 | 56763037 | 56772366 | 5.05 |
| chr20 | 56778422 | 56779803 | 4.04 |
| chr20 | 56784122 | 56785842 | 7.74 |
| chr20 | 56787585 | 56789091 | 4.04 |
| chr20 | 56790696 | 56797728 | 5.05 |
| chr20 | 56799932 | 56803767 | 5.38 |
| chr20 | 56804633 | 56808045 | 5.05 |
| chr20 | 56808939 | 56813544 | 6.73 |
| chr20 | 56813834 | 56814710 | 3.36 |
| chr20 | 56816190 | 56818666 | 4.04 |
| chr20 | 56819661 | 56842101 | 7.06 |
| chr20 | 56842322 | 56846090 | 4.71 |
| chr20 | 56847003 | 56850867 | 6.73 |
| chr20 | 56852506 | 56853978 | 6.05 |
| chr20 | 56854766 | 56855919 | 3.36 |
| chr20 | 56856169 | 56859734 | 5.38 |
| chr20 | 56860458 | 56861842 | 3.7  |
| chr20 | 56862306 | 56865097 | 4.37 |
| chr20 | 56865344 | 56871737 | 6.05 |
| chr20 | 56873014 | 56877411 | 5.38 |
| chr20 | 56879860 | 56880949 | 4.04 |
| chr20 | 56881710 | 56882635 | 3.7  |

|       |          |          |      |
|-------|----------|----------|------|
| chr20 | 56884163 | 56886392 | 5.38 |
| chr20 | 56888296 | 56889625 | 4.04 |
| chr20 | 56894726 | 56895586 | 3.03 |
| chr20 | 56901228 | 56909341 | 5.05 |
| chr20 | 56911343 | 56913335 | 3.7  |
| chr20 | 56914975 | 56922292 | 5.38 |
| chr20 | 56923125 | 56925959 | 5.05 |
| chr20 | 56926661 | 56929061 | 4.04 |
| chr20 | 56932621 | 56933548 | 4.37 |
| chr20 | 56934417 | 56936420 | 3.7  |
| chr20 | 56938162 | 56939668 | 3.7  |
| chr20 | 56941471 | 56944754 | 5.05 |
| chr20 | 56945368 | 56949913 | 5.38 |
| chr20 | 56950488 | 56952457 | 4.37 |
| chr20 | 56953660 | 56958509 | 7.06 |
| chr20 | 56960460 | 56961944 | 4.71 |
| chr20 | 56962260 | 56966243 | 6.05 |
| chr20 | 56968951 | 56969836 | 3.7  |
| chr20 | 56970738 | 56971587 | 4.04 |
| chr20 | 56972443 | 56974249 | 3.7  |
| chr20 | 56974694 | 56977474 | 3.7  |
| chr20 | 56977733 | 56983720 | 4.71 |
| chr20 | 56990007 | 56994365 | 5.05 |
| chr20 | 56995285 | 56997894 | 4.71 |
| chr20 | 56998271 | 57000232 | 5.72 |
| chr20 | 57002967 | 57005151 | 4.71 |
| chr20 | 57005651 | 57008244 | 4.71 |
| chr20 | 57008453 | 57011328 | 4.71 |
| chr20 | 57011563 | 57015996 | 3.7  |
| chr20 | 57017149 | 57020549 | 4.71 |
| chr20 | 57020813 | 57031232 | 7.4  |
| chr20 | 57031823 | 57035247 | 4.71 |
| chr20 | 57036396 | 57037810 | 4.04 |
| chr20 | 57038205 | 57040577 | 3.7  |
| chr20 | 57048069 | 57049747 | 4.04 |
| chr20 | 57050222 | 57051176 | 4.37 |
| chr20 | 57051491 | 57054451 | 5.05 |
| chr20 | 57054819 | 57071883 | 9.08 |
| chr20 | 57072539 | 57089488 | 7.74 |
| chr20 | 57093721 | 57120579 | 8.75 |
| chr20 | 57123721 | 57137501 | 6.05 |
| chr20 | 57140202 | 57141975 | 3.7  |
| chr20 | 57143337 | 57147429 | 5.05 |

|       |          |          |       |
|-------|----------|----------|-------|
| chr20 | 57147672 | 57150393 | 5.38  |
| chr20 | 57151039 | 57163133 | 6.05  |
| chr20 | 57165311 | 57167271 | 4.37  |
| chr20 | 57167475 | 57169331 | 4.37  |
| chr20 | 57169754 | 57173858 | 5.05  |
| chr20 | 57174283 | 57187772 | 6.05  |
| chr20 | 57188057 | 57190182 | 4.71  |
| chr20 | 57190459 | 57202266 | 8.41  |
| chr20 | 57202845 | 57204904 | 4.04  |
| chr20 | 57207953 | 57210243 | 4.04  |
| chr20 | 57211978 | 57217356 | 6.73  |
| chr20 | 57220528 | 57223559 | 4.71  |
| chr20 | 57224382 | 57236206 | 15.14 |
| chr20 | 57238897 | 57241347 | 4.04  |
| chr20 | 57241652 | 57243232 | 3.36  |
| chr20 | 57244221 | 57245263 | 4.37  |
| chr20 | 57245631 | 57246739 | 3.36  |
| chr20 | 57247414 | 57248322 | 3.36  |
| chr20 | 57248580 | 57250450 | 4.04  |
| chr20 | 57252274 | 57253377 | 4.04  |
| chr20 | 57254405 | 57255964 | 4.37  |
| chr20 | 57256911 | 57258863 | 4.04  |
| chr20 | 57259170 | 57261187 | 4.04  |
| chr20 | 57263361 | 57269494 | 5.38  |
| chr20 | 57269844 | 57272009 | 4.04  |
| chr20 | 57272595 | 57274192 | 3.03  |
| chr20 | 57274839 | 57275695 | 3.7   |
| chr20 | 57276512 | 57277816 | 3.7   |
| chr20 | 57279006 | 57281339 | 4.37  |
| chr20 | 57283870 | 57285412 | 4.71  |
| chr20 | 57290705 | 57293245 | 5.38  |
| chr20 | 57294445 | 57295256 | 3.03  |
| chr20 | 57295702 | 57297363 | 4.04  |
| chr20 | 57297594 | 57299594 | 3.03  |
| chr20 | 57300422 | 57303448 | 5.38  |
| chr20 | 57305784 | 57306576 | 3.36  |
| chr20 | 57308295 | 57309653 | 4.37  |
| chr20 | 57309886 | 57316514 | 5.05  |
| chr20 | 57319574 | 57325545 | 5.38  |
| chr20 | 57325986 | 57332571 | 5.38  |
| chr20 | 57333165 | 57339505 | 5.72  |
| chr20 | 57339761 | 57347223 | 5.72  |
| chr20 | 57347484 | 57348865 | 6.05  |

|       |          |          |      |
|-------|----------|----------|------|
| chr20 | 57351916 | 57359910 | 5.38 |
| chr20 | 57362836 | 57363652 | 3.7  |
| chr20 | 57378609 | 57381674 | 5.72 |
| chr20 | 57382405 | 57385261 | 4.04 |
| chr20 | 57390815 | 57392600 | 3.7  |
| chr20 | 57393998 | 57400774 | 4.71 |
| chr20 | 57402297 | 57403535 | 4.04 |
| chr20 | 57403980 | 57405276 | 4.37 |
| chr20 | 57407289 | 57409499 | 4.37 |
| chr20 | 57412839 | 57413727 | 5.05 |
| chr20 | 57415193 | 57419867 | 4.71 |
| chr20 | 57423184 | 57426931 | 4.37 |
| chr20 | 57427276 | 57432223 | 6.39 |
| chr20 | 57438483 | 57440054 | 4.37 |
| chr20 | 57444809 | 57451170 | 7.74 |
| chr20 | 57452355 | 57453509 | 3.7  |
| chr20 | 57457096 | 57469351 | 6.05 |
| chr20 | 57472385 | 57473545 | 4.04 |
| chr20 | 57474039 | 57477539 | 4.37 |
| chr20 | 57479054 | 57481017 | 4.71 |
| chr20 | 57481746 | 57483436 | 4.71 |
| chr20 | 57485777 | 57488576 | 5.38 |
| chr20 | 57488829 | 57489947 | 4.37 |
| chr20 | 57496333 | 57498478 | 4.04 |
| chr20 | 57500940 | 57502213 | 4.37 |
| chr20 | 57505960 | 57508172 | 3.7  |
| chr20 | 57508997 | 57515422 | 5.38 |
| chr20 | 57517323 | 57518645 | 4.71 |
| chr20 | 57520542 | 57521480 | 3.03 |
| chr20 | 57527045 | 57528792 | 3.7  |
| chr20 | 57530044 | 57532315 | 6.39 |
| chr20 | 57532794 | 57533835 | 3.7  |
| chr20 | 57535508 | 57536935 | 3.36 |
| chr20 | 57537165 | 57538742 | 3.36 |
| chr20 | 57539486 | 57540999 | 4.04 |
| chr20 | 57542377 | 57545864 | 4.71 |
| chr20 | 57547787 | 57549692 | 4.71 |
| chr20 | 57549917 | 57552255 | 7.74 |
| chr20 | 57553088 | 57557475 | 6.05 |
| chr20 | 57559336 | 57561446 | 5.05 |
| chr20 | 57563858 | 57565002 | 4.71 |
| chr20 | 57566187 | 57569076 | 4.71 |
| chr20 | 57575377 | 57576857 | 4.37 |

|       |          |          |      |
|-------|----------|----------|------|
| chr20 | 57577541 | 57579632 | 3.7  |
| chr20 | 57582019 | 57586911 | 5.05 |
| chr20 | 57587137 | 57588159 | 3.7  |
| chr20 | 57595081 | 57596607 | 4.04 |
| chr20 | 57597422 | 57598273 | 3.7  |
| chr20 | 57602966 | 57604479 | 4.04 |
| chr20 | 57605886 | 57609387 | 5.05 |
| chr20 | 57611226 | 57616315 | 5.05 |
| chr20 | 57616585 | 57620635 | 7.06 |
| chr20 | 57622489 | 57624127 | 4.71 |
| chr20 | 57625594 | 57628038 | 3.7  |
| chr20 | 57631004 | 57632909 | 3.7  |
| chr20 | 57636286 | 57637163 | 4.04 |
| chr20 | 57641010 | 57641846 | 3.36 |
| chr20 | 57642473 | 57645199 | 4.71 |
| chr20 | 57645697 | 57646696 | 3.7  |
| chr20 | 57646979 | 57647798 | 4.04 |
| chr20 | 57648953 | 57650665 | 4.71 |
| chr20 | 57651168 | 57651966 | 3.03 |
| chr20 | 57660494 | 57662080 | 4.71 |
| chr20 | 57664190 | 57665162 | 3.7  |
| chr20 | 57666706 | 57667987 | 4.37 |
| chr20 | 57668341 | 57669742 | 4.37 |
| chr20 | 57671368 | 57673918 | 4.04 |
| chr20 | 57675763 | 57683727 | 4.71 |
| chr20 | 57685847 | 57689764 | 5.38 |
| chr20 | 57691469 | 57697183 | 4.37 |
| chr20 | 57697452 | 57699992 | 4.04 |
| chr20 | 57705115 | 57708151 | 3.7  |
| chr20 | 57708453 | 57710602 | 6.05 |
| chr20 | 57710859 | 57712397 | 5.72 |
| chr20 | 57713069 | 57721686 | 4.71 |
| chr20 | 57723683 | 57727882 | 4.37 |
| chr20 | 57728305 | 57731456 | 4.04 |
| chr20 | 57732190 | 57735189 | 4.71 |
| chr20 | 57736871 | 57737667 | 3.36 |
| chr20 | 57739690 | 57742697 | 4.04 |
| chr20 | 57744688 | 57746681 | 4.04 |
| chr20 | 57748837 | 57750220 | 4.37 |
| chr20 | 57752230 | 57754101 | 3.7  |
| chr20 | 57758320 | 57759962 | 4.37 |
| chr20 | 57760514 | 57761921 | 4.04 |
| chr20 | 57762309 | 57763605 | 4.37 |

|       |          |          |      |
|-------|----------|----------|------|
| chr20 | 57764917 | 57765942 | 3.36 |
| chr20 | 57769545 | 57771877 | 4.37 |
| chr20 | 57774623 | 57776235 | 3.36 |
| chr20 | 57792782 | 57793697 | 4.04 |
| chr20 | 57794798 | 57798520 | 4.37 |
| chr20 | 57798775 | 57799938 | 3.36 |
| chr20 | 57800870 | 57802548 | 3.7  |
| chr20 | 57822837 | 57828453 | 4.04 |
| chr20 | 57831074 | 57832242 | 3.36 |
| chr20 | 57838465 | 57839884 | 4.37 |
| chr20 | 57843774 | 57844858 | 3.7  |
| chr20 | 57848874 | 57851289 | 5.38 |
| chr20 | 57858753 | 57859877 | 4.37 |
| chr20 | 57888370 | 57892298 | 4.37 |
| chr20 | 57894786 | 57895719 | 3.7  |
| chr20 | 57908139 | 57908941 | 3.7  |
| chr20 | 57918728 | 57920189 | 4.37 |
| chr20 | 57924664 | 57927247 | 4.71 |
| chr20 | 57927767 | 57929122 | 3.7  |
| chr20 | 57932408 | 57933375 | 4.37 |
| chr20 | 57942868 | 57943855 | 4.04 |
| chr20 | 57954824 | 57955865 | 3.36 |
| chr20 | 57961791 | 57962595 | 3.7  |
| chr20 | 57977673 | 57979218 | 3.36 |
| chr20 | 57980285 | 57982209 | 4.37 |
| chr20 | 57986230 | 57988186 | 4.37 |
| chr20 | 57991920 | 57993417 | 4.04 |
| chr20 | 58019123 | 58020303 | 4.04 |
| chr20 | 58037984 | 58039103 | 3.7  |
| chr20 | 58050217 | 58051139 | 3.36 |
| chr20 | 58051502 | 58052374 | 4.04 |
| chr20 | 58053412 | 58054435 | 4.04 |
| chr20 | 58055795 | 58056823 | 4.37 |
| chr20 | 58058049 | 58058902 | 4.04 |
| chr20 | 58071477 | 58072938 | 4.04 |
| chr20 | 58073737 | 58076012 | 5.05 |
| chr20 | 58089535 | 58091418 | 4.37 |
| chr20 | 58100014 | 58101569 | 3.7  |
| chr20 | 58105556 | 58106819 | 5.05 |
| chr20 | 58113736 | 58116738 | 4.37 |
| chr20 | 58118396 | 58120273 | 5.05 |
| chr20 | 58120890 | 58122293 | 3.36 |
| chr20 | 58135116 | 58135987 | 3.03 |

|       |          |          |      |
|-------|----------|----------|------|
| chr20 | 58136350 | 58137706 | 4.04 |
| chr20 | 58167141 | 58169549 | 4.37 |
| chr20 | 58183268 | 58186682 | 4.37 |
| chr20 | 58188555 | 58190438 | 4.37 |
| chr20 | 58190887 | 58192106 | 4.37 |
| chr20 | 58193667 | 58196370 | 4.71 |
| chr20 | 58200936 | 58202481 | 5.05 |
| chr20 | 58205882 | 58207226 | 4.04 |
| chr20 | 58208395 | 58209902 | 4.04 |
| chr20 | 58210218 | 58211408 | 4.04 |
| chr20 | 58214724 | 58218005 | 3.7  |
| chr20 | 58220371 | 58221931 | 4.71 |
| chr20 | 58223030 | 58228098 | 4.71 |
| chr20 | 58228725 | 58234524 | 7.06 |
| chr20 | 58235530 | 58236875 | 3.7  |
| chr20 | 58237298 | 58238411 | 3.7  |
| chr20 | 58239815 | 58241484 | 3.7  |
| chr20 | 58247371 | 58248967 | 3.36 |
| chr20 | 58250255 | 58251688 | 3.7  |
| chr20 | 58252305 | 58253213 | 2.69 |
| chr20 | 58263024 | 58265191 | 4.04 |
| chr20 | 58265574 | 58267486 | 4.37 |
| chr20 | 58268473 | 58270748 | 3.7  |
| chr20 | 58271260 | 58272824 | 3.7  |
| chr20 | 58273463 | 58276000 | 5.38 |
| chr20 | 58277250 | 58278852 | 3.36 |
| chr20 | 58280529 | 58285641 | 6.73 |
| chr20 | 58285869 | 58289321 | 5.05 |
| chr20 | 58297286 | 58298101 | 3.36 |
| chr20 | 58298966 | 58303290 | 4.04 |
| chr20 | 58305154 | 58306519 | 4.71 |
| chr20 | 58306747 | 58308297 | 5.05 |
| chr20 | 58309566 | 58311566 | 4.04 |
| chr20 | 58313722 | 58315274 | 4.37 |
| chr20 | 58317801 | 58319840 | 5.05 |
| chr20 | 58320419 | 58321403 | 3.7  |
| chr20 | 58325113 | 58328513 | 5.38 |
| chr20 | 58332799 | 58344440 | 7.4  |
| chr20 | 58345822 | 58349265 | 4.71 |
| chr20 | 58357770 | 58358831 | 4.71 |
| chr20 | 58361130 | 58363451 | 4.04 |
| chr20 | 58366665 | 58367958 | 3.36 |
| chr20 | 58369323 | 58380144 | 6.73 |



|       |          |          |      |
|-------|----------|----------|------|
| chr20 | 58381797 | 58383146 | 4.04 |
| chr20 | 58384093 | 58385132 | 3.36 |
| chr20 | 58387656 | 58389457 | 3.7  |
| chr20 | 58392745 | 58397083 | 4.37 |
| chr20 | 58398452 | 58399744 | 4.04 |
| chr20 | 58401046 | 58402511 | 4.71 |
| chr20 | 58405493 | 58409098 | 4.04 |
| chr20 | 58411850 | 58412981 | 3.36 |
| chr20 | 58413739 | 58416201 | 4.04 |
| chr20 | 58416851 | 58418131 | 3.7  |
| chr20 | 58420438 | 58422792 | 3.7  |
| chr20 | 58423335 | 58424506 | 4.04 |
| chr20 | 58432030 | 58437801 | 5.72 |
| chr20 | 58439487 | 58441163 | 4.37 |
| chr20 | 58445673 | 58447233 | 4.04 |
| chr20 | 58448282 | 58450562 | 3.7  |
| chr20 | 58451432 | 58454240 | 4.04 |
| chr20 | 58459563 | 58461505 | 4.37 |
| chr20 | 58468753 | 58470386 | 4.37 |
| chr20 | 58474850 | 58478576 | 4.71 |
| chr20 | 58479024 | 58482324 | 5.05 |
| chr20 | 58483295 | 58484449 | 3.7  |
| chr20 | 58488650 | 58490226 | 4.37 |
| chr20 | 58493896 | 58494707 | 3.36 |
| chr20 | 58496799 | 58498574 | 4.37 |
| chr20 | 58499444 | 58505102 | 5.38 |
| chr20 | 58505441 | 58510819 | 6.73 |
| chr20 | 58511703 | 58517823 | 8.41 |
| chr20 | 58518415 | 58525990 | 5.38 |
| chr20 | 58527228 | 58528061 | 3.7  |
| chr20 | 58529828 | 58531258 | 6.05 |
| chr20 | 58532350 | 58539780 | 4.37 |
| chr20 | 58541167 | 58542247 | 3.7  |
| chr20 | 58543316 | 58548364 | 5.05 |
| chr20 | 58550552 | 58553584 | 4.04 |
| chr20 | 58557033 | 58557839 | 4.71 |
| chr20 | 58560436 | 58578552 | 8.41 |
| chr20 | 58579759 | 58580835 | 3.7  |
| chr20 | 58581489 | 58584947 | 4.71 |
| chr20 | 58587077 | 58588788 | 4.71 |
| chr20 | 58589883 | 58596802 | 5.38 |
| chr20 | 58597592 | 58602313 | 4.37 |
| chr20 | 58602747 | 58604257 | 4.37 |

|       |          |          |       |
|-------|----------|----------|-------|
| chr20 | 58604776 | 58607339 | 4.37  |
| chr20 | 58609153 | 58614043 | 5.05  |
| chr20 | 58614251 | 58616340 | 5.38  |
| chr20 | 58616946 | 58663476 | 10.09 |
| chr20 | 58665184 | 58674371 | 10.43 |
| chr20 | 58675011 | 58680037 | 4.37  |
| chr20 | 58681575 | 58698599 | 4.71  |
| chr20 | 58699973 | 58702235 | 3.36  |
| chr20 | 58702752 | 58704250 | 3.36  |
| chr20 | 58705013 | 58709780 | 4.71  |
| chr20 | 58710842 | 58715762 | 6.05  |
| chr20 | 58716160 | 58717508 | 3.36  |
| chr20 | 58717744 | 58721208 | 4.71  |
| chr20 | 58721581 | 58727680 | 5.72  |
| chr20 | 58728908 | 58730991 | 3.7   |
| chr20 | 58731551 | 58738073 | 4.71  |
| chr20 | 58739969 | 58743541 | 4.04  |
| chr20 | 58743773 | 58748288 | 4.37  |
| chr20 | 58748990 | 58756212 | 5.72  |
| chr20 | 58757002 | 58760066 | 4.71  |
| chr20 | 58760850 | 58770760 | 5.38  |
| chr20 | 58773811 | 58776113 | 4.04  |
| chr20 | 58776683 | 58779128 | 4.71  |
| chr20 | 58780320 | 58783354 | 5.38  |
| chr20 | 58783715 | 58788801 | 4.04  |
| chr20 | 58792243 | 58793109 | 4.71  |
| chr20 | 58797157 | 58798393 | 4.04  |
| chr20 | 58798666 | 58808873 | 6.05  |
| chr20 | 58810850 | 58813650 | 3.7   |
| chr20 | 58814190 | 58819380 | 5.05  |
| chr20 | 58820556 | 58828175 | 4.37  |
| chr20 | 58830833 | 58832183 | 4.04  |
| chr20 | 58832703 | 58834147 | 4.04  |
| chr20 | 58834568 | 58835820 | 4.37  |
| chr20 | 58836051 | 58855338 | 11.77 |
| chr20 | 58855725 | 58857791 | 8.07  |
| chr20 | 58858135 | 58872660 | 23.54 |
| chr20 | 58873773 | 58875722 | 5.05  |
| chr20 | 58876615 | 58877714 | 3.36  |
| chr20 | 58877937 | 58879174 | 4.37  |
| chr20 | 58880233 | 58881802 | 3.36  |
| chr20 | 58882997 | 58885026 | 4.04  |
| chr20 | 58888114 | 58889360 | 3.36  |

|       |          |          |      |
|-------|----------|----------|------|
| chr20 | 58892238 | 58893439 | 4.04 |
| chr20 | 58895423 | 58898189 | 4.71 |
| chr20 | 58898813 | 58902525 | 4.37 |
| chr20 | 58902896 | 58904975 | 4.04 |
| chr20 | 58906454 | 58908103 | 4.04 |
| chr20 | 58908764 | 58910921 | 4.04 |
| chr20 | 58911409 | 58913925 | 5.05 |
| chr20 | 58916135 | 58917318 | 3.7  |
| chr20 | 58920622 | 58928789 | 5.38 |
| chr20 | 58929369 | 58930448 | 4.04 |
| chr20 | 58931756 | 58933529 | 5.05 |
| chr20 | 58936862 | 58938962 | 3.7  |
| chr20 | 58939360 | 58940799 | 3.7  |
| chr20 | 58941134 | 58942206 | 3.36 |
| chr20 | 58944913 | 58946234 | 4.37 |
| chr20 | 58952211 | 58953458 | 3.7  |
| chr20 | 58956512 | 58958903 | 4.04 |
| chr20 | 58961534 | 58962919 | 4.04 |
| chr20 | 58964764 | 58965677 | 2.69 |
| chr20 | 58969227 | 58970944 | 3.7  |
| chr20 | 58971712 | 58973093 | 4.71 |
| chr20 | 58974050 | 58975363 | 3.7  |
| chr20 | 58979768 | 58981785 | 5.05 |
| chr20 | 58982755 | 58984455 | 3.7  |
| chr20 | 58985853 | 58988021 | 4.71 |
| chr20 | 58992045 | 58993768 | 4.04 |
| chr20 | 58994129 | 58995818 | 5.72 |
| chr20 | 59000291 | 59003857 | 4.04 |
| chr20 | 59005793 | 59007143 | 3.36 |
| chr20 | 59011970 | 59015804 | 4.71 |
| chr20 | 59016635 | 59018172 | 5.05 |
| chr20 | 59025397 | 59028011 | 4.04 |
| chr20 | 59030406 | 59031560 | 4.04 |
| chr20 | 59031761 | 59033184 | 4.37 |
| chr20 | 59034708 | 59037136 | 4.37 |
| chr20 | 59043469 | 59045523 | 4.04 |
| chr20 | 59048085 | 59049328 | 4.04 |
| chr20 | 59050631 | 59051565 | 3.03 |
| chr20 | 59057348 | 59059112 | 4.37 |
| chr20 | 59059557 | 59062361 | 4.04 |
| chr20 | 59067607 | 59069075 | 3.7  |
| chr20 | 59072579 | 59074559 | 3.7  |
| chr20 | 59086203 | 59088980 | 3.7  |

|       |          |          |      |
|-------|----------|----------|------|
| chr20 | 59092089 | 59093546 | 4.37 |
| chr20 | 59095735 | 59097934 | 3.7  |
| chr20 | 59100247 | 59101566 | 4.71 |
| chr20 | 59102604 | 59103811 | 3.7  |
| chr20 | 59105523 | 59106614 | 4.37 |
| chr20 | 59106933 | 59109297 | 4.04 |
| chr20 | 59109841 | 59111413 | 4.37 |
| chr20 | 59113571 | 59115624 | 4.37 |
| chr20 | 59121663 | 59124101 | 3.7  |
| chr20 | 59125016 | 59126451 | 3.7  |
| chr20 | 59128251 | 59130234 | 4.37 |
| chr20 | 59133040 | 59134548 | 4.04 |
| chr20 | 59137484 | 59138506 | 3.7  |
| chr20 | 59140018 | 59142534 | 4.71 |
| chr20 | 59146511 | 59148128 | 4.04 |
| chr20 | 59152371 | 59153749 | 3.7  |
| chr20 | 59154806 | 59156736 | 3.7  |
| chr20 | 59161787 | 59166337 | 4.37 |
| chr20 | 59167919 | 59169372 | 4.37 |
| chr20 | 59172999 | 59175337 | 3.7  |
| chr20 | 59194785 | 59196377 | 3.36 |
| chr20 | 59198351 | 59199433 | 3.7  |
| chr20 | 59202835 | 59203652 | 3.7  |
| chr20 | 59211178 | 59212106 | 3.36 |
| chr20 | 59216921 | 59217993 | 3.03 |
| chr20 | 59243843 | 59244786 | 4.37 |
| chr20 | 59263260 | 59264798 | 3.7  |
| chr20 | 59293989 | 59295559 | 3.7  |
| chr20 | 59307173 | 59308421 | 4.04 |
| chr20 | 59322426 | 59324356 | 4.37 |
| chr20 | 59335952 | 59337258 | 4.04 |
| chr20 | 59339745 | 59341323 | 3.7  |
| chr20 | 59380849 | 59383014 | 3.7  |
| chr20 | 59385969 | 59387486 | 4.04 |
| chr20 | 59390503 | 59391269 | 3.7  |
| chr20 | 59392614 | 59395571 | 4.37 |
| chr20 | 59399399 | 59400201 | 3.03 |
| chr20 | 59400792 | 59401681 | 4.04 |
| chr20 | 59415118 | 59416220 | 4.04 |
| chr20 | 59443790 | 59444963 | 5.05 |
| chr20 | 59474238 | 59475351 | 5.38 |
| chr20 | 59475778 | 59476880 | 4.37 |
| chr20 | 59509251 | 59510194 | 3.36 |

|       |          |          |      |
|-------|----------|----------|------|
| chr20 | 59526534 | 59528397 | 4.04 |
| chr20 | 59534178 | 59534985 | 3.03 |
| chr20 | 59542681 | 59543582 | 3.7  |
| chr20 | 59562149 | 59563196 | 4.04 |
| chr20 | 59568172 | 59569687 | 4.37 |
| chr20 | 59578114 | 59579075 | 3.03 |
| chr20 | 59616708 | 59618881 | 4.37 |
| chr20 | 59636290 | 59637407 | 3.7  |
| chr20 | 59653263 | 59654943 | 3.7  |
| chr20 | 59656201 | 59657330 | 5.05 |
| chr20 | 59678365 | 59679857 | 3.7  |
| chr20 | 59683978 | 59685648 | 4.37 |
| chr20 | 59718484 | 59719481 | 4.04 |
| chr20 | 59719946 | 59722036 | 4.71 |
| chr20 | 59722559 | 59723900 | 3.36 |
| chr20 | 59725072 | 59728870 | 4.71 |
| chr20 | 59732438 | 59735426 | 4.71 |
| chr20 | 59737400 | 59738374 | 3.03 |
| chr20 | 59739095 | 59740852 | 4.71 |
| chr20 | 59741995 | 59744290 | 5.05 |
| chr20 | 59744575 | 59745503 | 4.04 |
| chr20 | 59760985 | 59761852 | 4.04 |
| chr20 | 59765366 | 59766612 | 4.04 |
| chr20 | 59769186 | 59770616 | 3.36 |
| chr20 | 59777268 | 59778134 | 3.03 |
| chr20 | 59796278 | 59798033 | 3.7  |
| chr20 | 59805159 | 59810321 | 6.73 |
| chr20 | 59815257 | 59820209 | 4.37 |
| chr20 | 59879197 | 59880200 | 3.36 |
| chr20 | 59914614 | 59915692 | 3.36 |
| chr20 | 59929957 | 59931442 | 3.36 |
| chr20 | 59935662 | 59936696 | 4.37 |
| chr20 | 59949260 | 59950501 | 4.37 |
| chr20 | 59965593 | 59967186 | 3.7  |
| chr20 | 59982095 | 59983596 | 3.7  |
| chr20 | 60011215 | 60012764 | 3.7  |
| chr20 | 60015837 | 60018438 | 4.04 |
| chr20 | 60020297 | 60022507 | 4.04 |
| chr20 | 60031574 | 60032541 | 4.37 |
| chr20 | 60051429 | 60053694 | 2.69 |
| chr20 | 60054526 | 60055520 | 4.04 |
| chr20 | 60059832 | 60060881 | 3.7  |
| chr20 | 60064180 | 60064931 | 2.69 |

|       |          |          |       |
|-------|----------|----------|-------|
| chr20 | 60065777 | 60066744 | 3.7   |
| chr20 | 60077084 | 60078134 | 4.04  |
| chr20 | 60124352 | 60125188 | 2.35  |
| chr20 | 60149665 | 60150859 | 3.7   |
| chr20 | 60166100 | 60168137 | 4.71  |
| chr20 | 60182916 | 60184281 | 4.37  |
| chr20 | 60294108 | 60295222 | 4.37  |
| chr20 | 60422231 | 60423127 | 3.7   |
| chr20 | 60440032 | 60440891 | 3.7   |
| chr20 | 60449274 | 60450527 | 4.37  |
| chr20 | 60562005 | 60562908 | 3.7   |
| chr20 | 60637643 | 60639298 | 4.04  |
| chr20 | 60640495 | 60642587 | 5.38  |
| chr20 | 60644042 | 60646362 | 4.71  |
| chr20 | 60647390 | 60655190 | 13.79 |
| chr20 | 60656356 | 60657468 | 3.7   |
| chr20 | 60661736 | 60663587 | 4.37  |
| chr20 | 60674552 | 60678094 | 4.71  |
| chr20 | 60678402 | 60689924 | 16.82 |
| chr20 | 60694137 | 60695483 | 3.7   |
| chr20 | 60696676 | 60699310 | 4.37  |
| chr20 | 60706780 | 60708078 | 3.36  |
| chr20 | 60716082 | 60717384 | 5.38  |
| chr20 | 60717760 | 60719123 | 4.04  |
| chr20 | 60719361 | 60720613 | 5.05  |
| chr20 | 60734112 | 60735121 | 4.04  |
| chr20 | 60738689 | 60740234 | 4.04  |
| chr20 | 60757270 | 60759397 | 4.37  |
| chr20 | 60764910 | 60765944 | 4.04  |
| chr20 | 60777859 | 60779416 | 3.36  |
| chr20 | 60782028 | 60786715 | 5.38  |
| chr20 | 60792969 | 60793846 | 4.04  |
| chr20 | 60794439 | 60796370 | 4.37  |
| chr20 | 60805649 | 60810123 | 5.72  |
| chr20 | 60813787 | 60814918 | 4.37  |
| chr20 | 60821257 | 60822193 | 4.04  |
| chr20 | 60841551 | 60842709 | 4.71  |
| chr20 | 60875062 | 60880909 | 7.06  |
| chr20 | 60881787 | 60883356 | 3.7   |
| chr20 | 60890035 | 60890936 | 3.36  |
| chr20 | 60893544 | 60896432 | 5.05  |
| chr20 | 60924870 | 60925777 | 3.7   |
| chr20 | 60927890 | 60928799 | 3.03  |

|       |          |          |      |
|-------|----------|----------|------|
| chr20 | 60931367 | 60932928 | 3.7  |
| chr20 | 60935716 | 60937972 | 4.04 |
| chr20 | 60939676 | 60947067 | 5.05 |
| chr20 | 60948878 | 60950589 | 4.37 |
| chr20 | 60952763 | 60954059 | 4.71 |
| chr20 | 60960943 | 60962548 | 5.38 |
| chr20 | 60970757 | 60972199 | 4.37 |
| chr20 | 60979354 | 60981343 | 3.7  |
| chr20 | 60982144 | 60983361 | 4.37 |
| chr20 | 60984458 | 60987636 | 3.7  |
| chr20 | 60997779 | 60999141 | 4.04 |
| chr20 | 61001192 | 61003499 | 8.75 |
| chr20 | 61011295 | 61012218 | 3.03 |
| chr20 | 61027210 | 61028117 | 3.7  |
| chr20 | 61053486 | 61054892 | 4.04 |
| chr20 | 61056132 | 61059857 | 4.04 |
| chr20 | 61063578 | 61064415 | 4.04 |
| chr20 | 61065686 | 61067226 | 4.71 |
| chr20 | 61067961 | 61070095 | 3.7  |
| chr20 | 61078363 | 61079326 | 3.7  |
| chr20 | 61080597 | 61081502 | 4.04 |
| chr20 | 61141767 | 61142927 | 4.04 |
| chr20 | 61173209 | 61173996 | 2.69 |
| chr20 | 61192383 | 61193228 | 2.35 |
| chr20 | 61195185 | 61196347 | 3.7  |
| chr20 | 61207204 | 61208608 | 4.04 |
| chr20 | 61269480 | 61270523 | 3.7  |
| chr20 | 61272422 | 61276224 | 4.71 |
| chr20 | 61282357 | 61285252 | 5.72 |
| chr20 | 61307383 | 61308961 | 3.36 |
| chr20 | 61333775 | 61336347 | 7.4  |
| chr20 | 61336946 | 61339457 | 3.7  |
| chr20 | 61345782 | 61347052 | 3.7  |
| chr20 | 61351676 | 61352706 | 3.7  |
| chr20 | 61365271 | 61366718 | 4.71 |
| chr20 | 61370805 | 61371620 | 5.05 |
| chr20 | 61400547 | 61402174 | 3.03 |
| chr20 | 61417648 | 61418594 | 4.04 |
| chr20 | 61422310 | 61424584 | 5.05 |
| chr20 | 61426179 | 61427124 | 5.05 |
| chr20 | 61428364 | 61429772 | 3.7  |
| chr20 | 61434444 | 61437859 | 4.04 |
| chr20 | 61452113 | 61452919 | 3.7  |

|       |          |          |      |
|-------|----------|----------|------|
| chr20 | 61460095 | 61461580 | 3.03 |
| chr20 | 61466096 | 61468119 | 4.04 |
| chr20 | 61478489 | 61479460 | 3.7  |
| chr20 | 61492565 | 61493964 | 4.04 |
| chr20 | 61509036 | 61510636 | 4.04 |
| chr20 | 61531320 | 61532549 | 4.04 |
| chr20 | 61548680 | 61549578 | 3.7  |
| chr20 | 61555709 | 61557935 | 4.04 |
| chr20 | 61568248 | 61570538 | 6.05 |
| chr20 | 61572084 | 61573125 | 3.36 |
| chr20 | 61579763 | 61581084 | 3.7  |
| chr20 | 61639999 | 61641208 | 5.05 |
| chr20 | 61643513 | 61644996 | 5.05 |
| chr20 | 61682297 | 61683442 | 5.05 |
| chr20 | 61687568 | 61689241 | 4.37 |
| chr20 | 61696126 | 61697277 | 4.04 |
| chr20 | 61707837 | 61709622 | 3.7  |
| chr20 | 61710360 | 61711412 | 3.7  |
| chr20 | 61713029 | 61714462 | 5.05 |
| chr20 | 61720204 | 61721797 | 4.71 |
| chr20 | 61722135 | 61723175 | 3.7  |
| chr20 | 61733086 | 61733971 | 3.36 |
| chr20 | 61734782 | 61735699 | 3.36 |
| chr20 | 61737944 | 61738969 | 4.37 |
| chr20 | 61743238 | 61746484 | 4.71 |
| chr20 | 61778360 | 61780004 | 7.06 |
| chr20 | 61792637 | 61793750 | 3.7  |
| chr20 | 61809679 | 61811456 | 4.04 |
| chr20 | 61817600 | 61818604 | 4.04 |
| chr20 | 61818870 | 61819689 | 3.03 |
| chr20 | 61840910 | 61841930 | 4.04 |
| chr20 | 61846207 | 61848219 | 4.04 |
| chr20 | 61855080 | 61857000 | 4.71 |
| chr20 | 61865994 | 61866989 | 3.7  |
| chr20 | 61880133 | 61882027 | 4.04 |
| chr20 | 61899998 | 61901345 | 3.7  |
| chr20 | 61904644 | 61905934 | 4.71 |
| chr20 | 61932607 | 61933777 | 4.04 |
| chr20 | 61940218 | 61941281 | 2.35 |
| chr20 | 61961952 | 61963179 | 4.04 |
| chr20 | 61986190 | 61987189 | 3.36 |
| chr20 | 62008823 | 62011332 | 4.04 |
| chr20 | 62016662 | 62022177 | 8.41 |



|       |          |          |       |
|-------|----------|----------|-------|
| chr20 | 62022856 | 62024282 | 4.04  |
| chr20 | 62032462 | 62033348 | 4.37  |
| chr20 | 62043482 | 62044386 | 4.37  |
| chr20 | 62060644 | 62062074 | 3.7   |
| chr20 | 62065765 | 62066863 | 4.71  |
| chr20 | 62074921 | 62075782 | 4.04  |
| chr20 | 62083383 | 62084540 | 4.04  |
| chr20 | 62085899 | 62086966 | 3.36  |
| chr20 | 62087613 | 62088755 | 2.35  |
| chr20 | 62106094 | 62107385 | 5.72  |
| chr20 | 62112297 | 62115118 | 4.37  |
| chr20 | 62116854 | 62118441 | 4.37  |
| chr20 | 62124211 | 62125009 | 3.36  |
| chr20 | 62128195 | 62131250 | 3.36  |
| chr20 | 62134972 | 62136579 | 3.36  |
| chr20 | 62150353 | 62155524 | 4.37  |
| chr20 | 62164535 | 62165423 | 4.04  |
| chr20 | 62167483 | 62171108 | 6.73  |
| chr20 | 62174476 | 62175691 | 4.71  |
| chr20 | 62176444 | 62177395 | 4.71  |
| chr20 | 62178140 | 62179682 | 4.37  |
| chr20 | 62183576 | 62184576 | 3.7   |
| chr20 | 62211758 | 62213227 | 3.36  |
| chr20 | 62256917 | 62258625 | 4.04  |
| chr20 | 62259129 | 62261629 | 8.41  |
| chr20 | 62273772 | 62275617 | 5.05  |
| chr20 | 62282909 | 62284588 | 3.7   |
| chr20 | 62288173 | 62290455 | 12.78 |
| chr20 | 62295626 | 62297674 | 11.77 |
| chr20 | 62313337 | 62314699 | 5.72  |
| chr20 | 62336145 | 62337190 | 3.7   |
| chr20 | 62337978 | 62341005 | 5.38  |
| chr20 | 62343169 | 62343995 | 3.36  |
| chr20 | 62345648 | 62347033 | 4.71  |
| chr20 | 62350266 | 62351310 | 4.04  |
| chr20 | 62356169 | 62358891 | 9.08  |
| chr20 | 62359468 | 62360697 | 4.04  |
| chr20 | 62362667 | 62363549 | 4.04  |
| chr20 | 62365937 | 62367417 | 4.37  |
| chr20 | 62371197 | 62373236 | 5.05  |
| chr20 | 62374312 | 62375477 | 3.36  |
| chr20 | 62380956 | 62381722 | 3.7   |
| chr20 | 62394447 | 62395354 | 3.7   |

|       |          |          |       |
|-------|----------|----------|-------|
| chr20 | 62450614 | 62451561 | 4.37  |
| chr20 | 62462591 | 62463430 | 2.69  |
| chr20 | 62477312 | 62478273 | 4.04  |
| chr20 | 62479005 | 62480309 | 4.37  |
| chr20 | 62488222 | 62491135 | 4.37  |
| chr20 | 62494728 | 62497828 | 6.39  |
| chr20 | 62527604 | 62528348 | 4.04  |
| chr20 | 62581334 | 62582836 | 4.04  |
| chr20 | 62586298 | 62588676 | 4.37  |
| chr20 | 62590167 | 62591381 | 4.37  |
| chr20 | 62604725 | 62606762 | 6.05  |
| chr20 | 62610996 | 62612968 | 4.04  |
| chr20 | 62614056 | 62615016 | 3.7   |
| chr20 | 62641606 | 62642860 | 3.7   |
| chr20 | 62675123 | 62677035 | 5.05  |
| chr20 | 62693871 | 62694732 | 3.36  |
| chr20 | 62696762 | 62698467 | 5.05  |
| chr20 | 62710089 | 62711516 | 5.05  |
| chr20 | 62776000 | 62777617 | 4.04  |
| chr20 | 62792433 | 62793722 | 3.36  |
| chr20 | 62812836 | 62813654 | 3.7   |
| chr20 | 62815303 | 62816171 | 3.03  |
| chr20 | 62830374 | 62831501 | 3.36  |
| chr20 | 62842596 | 62843346 | 1.68  |
| chr20 | 62853304 | 62854623 | 3.7   |
| chr20 | 62887020 | 62887999 | 4.04  |
| chr20 | 62894121 | 62895325 | 5.05  |
| chr21 | 9418321  | 9419529  | 4.04  |
| chr21 | 9825660  | 9827759  | 30.27 |
| chr21 | 9832266  | 9833152  | 3.7   |
| chr21 | 10084773 | 10085672 | 5.72  |
| chr21 | 10697801 | 10707865 | 14.46 |
| chr21 | 10708642 | 10728477 | 13.45 |
| chr21 | 10730096 | 10730835 | 3.7   |
| chr21 | 10733486 | 10734640 | 3.7   |
| chr21 | 10735529 | 10736812 | 3.36  |
| chr21 | 10743084 | 10746612 | 4.71  |
| chr21 | 10748447 | 10754431 | 6.05  |
| chr21 | 10754970 | 10764221 | 6.39  |
| chr21 | 10764562 | 10766587 | 5.05  |
| chr21 | 10772627 | 10793074 | 5.72  |
| chr21 | 10793592 | 10812027 | 6.39  |
| chr21 | 10813491 | 10819569 | 5.38  |

|       |          |          |      |
|-------|----------|----------|------|
| chr21 | 10819838 | 10825025 | 5.05 |
| chr21 | 10825616 | 10828622 | 4.04 |
| chr21 | 10830025 | 10831176 | 5.72 |
| chr21 | 10831619 | 10834398 | 4.71 |
| chr21 | 10834734 | 10838496 | 5.38 |
| chr21 | 10839278 | 10840483 | 3.7  |
| chr21 | 10841135 | 10844247 | 5.72 |
| chr21 | 10845953 | 10847471 | 3.03 |
| chr21 | 10849043 | 10850034 | 4.04 |
| chr21 | 10850761 | 10853190 | 4.37 |
| chr21 | 10854136 | 10859388 | 6.05 |
| chr21 | 10859903 | 10861239 | 6.05 |
| chr21 | 10936495 | 10937427 | 3.7  |
| chr21 | 11032625 | 11035448 | 4.71 |
| chr21 | 11037266 | 11038066 | 3.7  |
| chr21 | 11040576 | 11043151 | 5.72 |
| chr21 | 11043522 | 11046527 | 3.7  |
| chr21 | 11047411 | 11049695 | 4.37 |
| chr21 | 11050227 | 11052181 | 4.04 |
| chr21 | 11052805 | 11053652 | 2.69 |
| chr21 | 11053873 | 11057810 | 6.05 |
| chr21 | 11060518 | 11064449 | 7.06 |
| chr21 | 11064877 | 11072368 | 5.05 |
| chr21 | 11072841 | 11077086 | 7.06 |
| chr21 | 11077760 | 11080515 | 6.73 |
| chr21 | 11081520 | 11085619 | 6.05 |
| chr21 | 11085889 | 11087162 | 5.05 |
| chr21 | 11087395 | 11088717 | 4.37 |
| chr21 | 11092609 | 11096853 | 6.05 |
| chr21 | 11151055 | 11152255 | 4.37 |
| chr21 | 11180258 | 11182197 | 4.04 |
| chr21 | 11185058 | 11186794 | 5.05 |
| chr21 | 14338173 | 14346585 | 7.4  |
| chr21 | 14355817 | 14362900 | 5.72 |
| chr21 | 14364553 | 14365924 | 7.4  |
| chr21 | 14366359 | 14368761 | 5.38 |
| chr21 | 15601348 | 15602636 | 5.38 |
| chr21 | 16528745 | 16530050 | 3.7  |
| chr21 | 16672647 | 16673965 | 3.7  |
| chr21 | 17325465 | 17326719 | 5.72 |
| chr21 | 19179784 | 19181113 | 6.73 |
| chr21 | 22768829 | 22769916 | 3.7  |
| chr21 | 23708749 | 23709675 | 3.36 |

|       |          |          |       |
|-------|----------|----------|-------|
| chr21 | 24099943 | 24101293 | 6.73  |
| chr21 | 27645628 | 27646814 | 4.71  |
| chr21 | 30898455 | 30899432 | 3.7   |
| chr21 | 34739248 | 34740450 | 5.38  |
| chr21 | 35119338 | 35120458 | 4.37  |
| chr21 | 35537841 | 35539904 | 5.72  |
| chr21 | 38639627 | 38640512 | 3.7   |
| chr21 | 38720449 | 38721904 | 6.05  |
| chr21 | 39426700 | 39427518 | 2.02  |
| chr21 | 39483539 | 39484658 | 4.71  |
| chr21 | 39487138 | 39487980 | 4.37  |
| chr21 | 39498596 | 39499586 | 4.04  |
| chr21 | 39500490 | 39501360 | 3.36  |
| chr21 | 39505800 | 39506712 | 3.7   |
| chr21 | 39510548 | 39520884 | 7.74  |
| chr21 | 39528066 | 39529227 | 3.36  |
| chr21 | 39530047 | 39530900 | 3.7   |
| chr21 | 39531130 | 39531993 | 3.03  |
| chr21 | 39538283 | 39539170 | 3.36  |
| chr21 | 39541123 | 39544374 | 4.71  |
| chr21 | 39583493 | 39584354 | 3.7   |
| chr21 | 39590710 | 39603616 | 28.93 |
| chr21 | 39606049 | 39607523 | 5.05  |
| chr21 | 39615817 | 39616924 | 3.36  |
| chr21 | 39620141 | 39621787 | 4.04  |
| chr21 | 39643907 | 39644699 | 2.35  |
| chr21 | 39650809 | 39651784 | 4.37  |
| chr21 | 39704950 | 39706614 | 3.7   |
| chr21 | 39709509 | 39710602 | 3.36  |
| chr21 | 39715018 | 39716384 | 5.05  |
| chr21 | 39724045 | 39725208 | 4.37  |
| chr21 | 39746358 | 39747795 | 3.36  |
| chr21 | 39783810 | 39785084 | 4.37  |
| chr21 | 39831466 | 39832876 | 4.04  |
| chr21 | 39860253 | 39861215 | 3.7   |
| chr21 | 39964280 | 39965787 | 3.7   |
| chr21 | 39967818 | 39969042 | 4.71  |
| chr21 | 40007318 | 40009068 | 4.04  |
| chr21 | 40012363 | 40013710 | 4.04  |
| chr21 | 40075712 | 40076615 | 3.7   |
| chr21 | 40085205 | 40086647 | 3.36  |
| chr21 | 40096618 | 40097710 | 3.36  |
| chr21 | 40156296 | 40156982 | 2.35  |

|       |          |          |       |
|-------|----------|----------|-------|
| chr21 | 40158975 | 40160900 | 5.05  |
| chr21 | 40191234 | 40192418 | 4.37  |
| chr21 | 40197915 | 40200206 | 3.7   |
| chr21 | 40234550 | 40235447 | 3.36  |
| chr21 | 40252552 | 40254057 | 3.7   |
| chr21 | 40255747 | 40261984 | 18.84 |
| chr21 | 40281630 | 40285522 | 4.71  |
| chr21 | 40320354 | 40321783 | 3.36  |
| chr21 | 40323763 | 40325292 | 3.36  |
| chr21 | 40334246 | 40335385 | 3.7   |
| chr21 | 40337361 | 40338494 | 4.04  |
| chr21 | 40359665 | 40360671 | 3.36  |
| chr21 | 40378198 | 40378977 | 3.36  |
| chr21 | 40395207 | 40396082 | 3.36  |
| chr21 | 40397769 | 40398431 | 3.7   |
| chr21 | 40402181 | 40403187 | 3.36  |
| chr21 | 40427264 | 40428186 | 2.35  |
| chr21 | 40434740 | 40436045 | 3.7   |
| chr21 | 40446149 | 40447825 | 4.71  |
| chr21 | 40466191 | 40467682 | 3.36  |
| chr21 | 40472446 | 40473560 | 4.04  |
| chr21 | 40494820 | 40495729 | 4.04  |
| chr21 | 40534834 | 40537060 | 4.71  |
| chr21 | 40667855 | 40668774 | 2.35  |
| chr21 | 40671897 | 40673234 | 4.37  |
| chr21 | 40684853 | 40686454 | 7.4   |
| chr21 | 40688472 | 40690853 | 4.37  |
| chr21 | 40693250 | 40694162 | 4.04  |
| chr21 | 40719695 | 40721152 | 3.7   |
| chr21 | 40759677 | 40760983 | 4.04  |
| chr21 | 40777265 | 40778677 | 4.04  |
| chr21 | 40802612 | 40803624 | 3.7   |
| chr21 | 40895064 | 40896417 | 4.71  |
| chr21 | 40898760 | 40900646 | 4.04  |
| chr21 | 40938721 | 40940477 | 4.04  |
| chr21 | 40950841 | 40952536 | 5.38  |
| chr21 | 40958108 | 40961257 | 4.71  |
| chr21 | 40967125 | 40968907 | 4.04  |
| chr21 | 40995109 | 40999017 | 4.37  |
| chr21 | 41013188 | 41014647 | 3.36  |
| chr21 | 41015127 | 41016276 | 4.37  |
| chr21 | 41033560 | 41034422 | 2.02  |
| chr21 | 41036892 | 41038122 | 5.38  |

|       |          |          |      |
|-------|----------|----------|------|
| chr21 | 41038575 | 41039882 | 3.7  |
| chr21 | 41041457 | 41042457 | 4.04 |
| chr21 | 41074364 | 41076345 | 6.73 |
| chr21 | 41093715 | 41094517 | 3.36 |
| chr21 | 41109133 | 41110044 | 3.03 |
| chr21 | 41165975 | 41166830 | 4.71 |
| chr21 | 41177117 | 41178295 | 4.37 |
| chr21 | 41184691 | 41185721 | 3.36 |
| chr21 | 41212168 | 41212971 | 3.36 |
| chr21 | 41223687 | 41224931 | 5.05 |
| chr21 | 41226110 | 41228033 | 3.36 |
| chr21 | 41279875 | 41280873 | 3.7  |
| chr21 | 41286437 | 41287630 | 4.71 |
| chr21 | 41331932 | 41332724 | 4.04 |
| chr21 | 41361293 | 41362707 | 3.36 |
| chr21 | 41370747 | 41372241 | 4.37 |
| chr21 | 41403563 | 41404643 | 3.7  |
| chr21 | 41526267 | 41527105 | 2.35 |
| chr21 | 41595082 | 41596144 | 4.04 |
| chr21 | 41619286 | 41622325 | 6.05 |
| chr21 | 41623184 | 41624238 | 4.37 |
| chr21 | 41652127 | 41653027 | 3.36 |
| chr21 | 41670837 | 41672464 | 4.04 |
| chr21 | 41674458 | 41676522 | 3.36 |
| chr21 | 41684919 | 41686498 | 4.04 |
| chr21 | 41687315 | 41688520 | 4.04 |
| chr21 | 41689869 | 41691387 | 5.05 |
| chr21 | 41692670 | 41694005 | 3.7  |
| chr21 | 41708812 | 41713882 | 5.38 |
| chr21 | 41723651 | 41724530 | 3.7  |
| chr21 | 41728128 | 41729198 | 3.36 |
| chr21 | 41746546 | 41747458 | 3.7  |
| chr21 | 41748534 | 41749545 | 4.04 |
| chr21 | 41753020 | 41755281 | 4.71 |
| chr21 | 41756370 | 41759086 | 5.38 |
| chr21 | 41759827 | 41763028 | 4.37 |
| chr21 | 41770917 | 41774008 | 5.05 |
| chr21 | 41775065 | 41776820 | 4.71 |
| chr21 | 41780828 | 41783099 | 4.37 |
| chr21 | 41784994 | 41786247 | 3.36 |
| chr21 | 41789518 | 41793839 | 6.73 |
| chr21 | 41810146 | 41812381 | 4.71 |
| chr21 | 41813111 | 41814139 | 4.04 |

|       |          |          |      |
|-------|----------|----------|------|
| chr21 | 41815776 | 41818374 | 5.72 |
| chr21 | 41832283 | 41833292 | 3.36 |
| chr21 | 41835086 | 41835947 | 3.03 |
| chr21 | 41851266 | 41852281 | 3.36 |
| chr21 | 41853842 | 41854697 | 3.7  |
| chr21 | 41861686 | 41862416 | 4.71 |
| chr21 | 41863605 | 41865262 | 4.04 |
| chr21 | 41866554 | 41867681 | 4.37 |
| chr21 | 41897526 | 41900233 | 5.72 |
| chr21 | 41909491 | 41910979 | 3.36 |
| chr21 | 41977954 | 41980596 | 4.37 |
| chr21 | 41981004 | 41982722 | 4.37 |
| chr21 | 41989764 | 41990647 | 3.36 |
| chr21 | 41998132 | 42000185 | 3.36 |
| chr21 | 42000780 | 42002189 | 3.36 |
| chr21 | 42004273 | 42005901 | 4.04 |
| chr21 | 42014964 | 42022641 | 8.75 |
| chr21 | 42024139 | 42025112 | 4.37 |
| chr21 | 42061424 | 42062833 | 4.71 |
| chr21 | 42063848 | 42064868 | 4.04 |
| chr21 | 42080526 | 42081229 | 3.36 |
| chr21 | 42089383 | 42090488 | 4.04 |
| chr21 | 42092869 | 42094164 | 5.38 |
| chr21 | 42171018 | 42174301 | 5.38 |
| chr21 | 42212956 | 42213829 | 3.03 |
| chr21 | 42266629 | 42268070 | 3.7  |
| chr21 | 42290169 | 42291757 | 3.7  |
| chr21 | 42300622 | 42301763 | 5.38 |
| chr21 | 42315251 | 42316349 | 4.04 |
| chr21 | 42346892 | 42349131 | 4.71 |
| chr21 | 42372262 | 42373595 | 4.37 |
| chr21 | 42395749 | 42397327 | 3.03 |
| chr21 | 42417155 | 42418408 | 4.04 |
| chr21 | 42428121 | 42428980 | 4.04 |
| chr21 | 42434712 | 42435833 | 4.04 |
| chr21 | 42446709 | 42447587 | 3.7  |
| chr21 | 42450783 | 42451970 | 4.04 |
| chr21 | 42456152 | 42457134 | 4.04 |
| chr21 | 42483290 | 42484188 | 4.04 |
| chr21 | 42484950 | 42486180 | 4.37 |
| chr21 | 42513909 | 42515010 | 4.37 |
| chr21 | 42527136 | 42531666 | 4.37 |
| chr21 | 42539130 | 42540294 | 3.36 |

|       |          |          |      |
|-------|----------|----------|------|
| chr21 | 42554004 | 42555444 | 5.38 |
| chr21 | 42556664 | 42558067 | 4.04 |
| chr21 | 42560314 | 42561736 | 3.7  |
| chr21 | 42608041 | 42609262 | 3.36 |
| chr21 | 42625385 | 42626437 | 4.37 |
| chr21 | 42643422 | 42644812 | 4.04 |
| chr21 | 42673171 | 42674444 | 4.37 |
| chr21 | 42714542 | 42715307 | 3.03 |
| chr21 | 42737266 | 42738139 | 3.03 |
| chr21 | 42752084 | 42753232 | 2.02 |
| chr21 | 42767894 | 42769303 | 4.04 |
| chr21 | 42791714 | 42792690 | 3.7  |
| chr21 | 42804406 | 42805632 | 4.04 |
| chr21 | 42806178 | 42808841 | 8.07 |
| chr21 | 42878239 | 42880061 | 5.72 |
| chr21 | 42898611 | 42899506 | 3.7  |
| chr21 | 42905906 | 42906721 | 3.36 |
| chr21 | 42907665 | 42909198 | 7.4  |
| chr21 | 42948281 | 42949903 | 3.36 |
| chr21 | 43008965 | 43009859 | 3.36 |
| chr21 | 43021149 | 43022694 | 4.04 |
| chr21 | 43025687 | 43027487 | 4.04 |
| chr21 | 43032569 | 43033549 | 3.7  |
| chr21 | 43050037 | 43051338 | 3.7  |
| chr21 | 43098013 | 43099485 | 4.04 |
| chr21 | 43100124 | 43102160 | 4.04 |
| chr21 | 43106258 | 43107319 | 4.37 |
| chr21 | 43112400 | 43113345 | 3.7  |
| chr21 | 43119169 | 43120029 | 3.03 |
| chr21 | 43123841 | 43125176 | 3.7  |
| chr21 | 43135308 | 43136900 | 4.71 |
| chr21 | 43157520 | 43159369 | 4.04 |
| chr21 | 43171166 | 43172190 | 3.03 |
| chr21 | 43178308 | 43179369 | 4.04 |
| chr21 | 43186479 | 43187472 | 2.69 |
| chr21 | 43203167 | 43204561 | 6.05 |
| chr21 | 43205621 | 43207370 | 4.04 |
| chr21 | 43210979 | 43214382 | 7.06 |
| chr21 | 43260544 | 43261882 | 4.71 |
| chr21 | 43299039 | 43300171 | 4.71 |
| chr21 | 43314827 | 43315758 | 3.7  |
| chr21 | 43320519 | 43322104 | 3.7  |
| chr21 | 43373825 | 43375234 | 5.38 |



|       |          |          |       |
|-------|----------|----------|-------|
| chr21 | 43375571 | 43377047 | 4.04  |
| chr21 | 43377932 | 43378880 | 4.04  |
| chr21 | 43384943 | 43386116 | 4.04  |
| chr21 | 43399617 | 43400606 | 4.04  |
| chr21 | 43413013 | 43413841 | 3.36  |
| chr21 | 43414308 | 43417034 | 7.74  |
| chr21 | 43442042 | 43443117 | 4.37  |
| chr21 | 43459262 | 43460063 | 3.03  |
| chr21 | 43476259 | 43478156 | 6.73  |
| chr21 | 43513501 | 43514851 | 4.04  |
| chr21 | 43525837 | 43526630 | 4.37  |
| chr21 | 43527454 | 43528307 | 4.04  |
| chr21 | 43533225 | 43534533 | 4.04  |
| chr21 | 43534984 | 43535990 | 3.7   |
| chr21 | 43540043 | 43541101 | 4.04  |
| chr21 | 43565236 | 43566217 | 3.7   |
| chr21 | 43619734 | 43620860 | 2.02  |
| chr21 | 43647988 | 43649737 | 4.04  |
| chr21 | 43728768 | 43729955 | 4.04  |
| chr21 | 43735205 | 43736525 | 4.04  |
| chr21 | 43757367 | 43758983 | 4.37  |
| chr21 | 43773902 | 43776514 | 5.38  |
| chr21 | 43779962 | 43781431 | 4.04  |
| chr21 | 43784423 | 43787520 | 7.06  |
| chr21 | 43795568 | 43797272 | 5.38  |
| chr21 | 43801375 | 43802517 | 3.03  |
| chr21 | 43805767 | 43807463 | 4.04  |
| chr21 | 43826187 | 43827370 | 4.04  |
| chr21 | 43845412 | 43846621 | 3.36  |
| chr21 | 43849158 | 43850938 | 3.7   |
| chr21 | 43856767 | 43858976 | 4.71  |
| chr21 | 43869661 | 43870853 | 4.04  |
| chr21 | 43887128 | 43888118 | 3.7   |
| chr21 | 43898275 | 43899517 | 4.37  |
| chr21 | 43911428 | 43912978 | 4.04  |
| chr21 | 43933604 | 43935115 | 3.7   |
| chr21 | 44024826 | 44026757 | 8.75  |
| chr21 | 44027008 | 44028180 | 4.37  |
| chr21 | 44034004 | 44035475 | 3.36  |
| chr21 | 44058069 | 44059041 | 2.35  |
| chr21 | 44121653 | 44122786 | 3.03  |
| chr21 | 44234419 | 44238564 | 12.45 |
| chr21 | 44348551 | 44349216 | 1.68  |

|       |          |          |      |
|-------|----------|----------|------|
| chr21 | 44375386 | 44376553 | 4.37 |
| chr21 | 44461847 | 44463854 | 8.07 |
| chr21 | 44464577 | 44466357 | 4.04 |
| chr21 | 44527062 | 44528566 | 4.04 |
| chr21 | 44571072 | 44572217 | 3.7  |
| chr21 | 44618259 | 44620386 | 3.7  |
| chr21 | 44620946 | 44622732 | 7.06 |
| chr21 | 44762370 | 44764022 | 5.05 |
| chr21 | 44764553 | 44765670 | 4.37 |
| chr21 | 44783584 | 44784439 | 1.68 |
| chr21 | 44820603 | 44821466 | 2.35 |
| chr21 | 44855629 | 44856615 | 3.7  |
| chr21 | 44897424 | 44898606 | 4.04 |
| chr21 | 44919725 | 44920696 | 3.7  |
| chr21 | 44936010 | 44937650 | 5.38 |
| chr21 | 44963500 | 44965985 | 6.39 |
| chr21 | 45038966 | 45040679 | 4.71 |
| chr21 | 45079067 | 45079928 | 3.36 |
| chr21 | 45131938 | 45133283 | 3.36 |
| chr21 | 45138584 | 45140006 | 4.04 |
| chr21 | 45230530 | 45231735 | 5.05 |
| chr21 | 45280173 | 45281101 | 3.7  |
| chr21 | 45349085 | 45350336 | 4.04 |
| chr21 | 45358473 | 45359653 | 5.05 |
| chr21 | 45431034 | 45432362 | 4.37 |
| chr21 | 45599135 | 45601014 | 3.7  |
| chr21 | 45601348 | 45602479 | 4.37 |
| chr21 | 45621764 | 45623166 | 4.04 |
| chr21 | 45627473 | 45628695 | 6.05 |
| chr21 | 45660976 | 45662028 | 4.04 |
| chr21 | 45798507 | 45799410 | 3.36 |
| chr21 | 45803406 | 45805921 | 5.05 |
| chr21 | 45863962 | 45865102 | 4.04 |
| chr21 | 45873401 | 45874795 | 5.38 |
| chr21 | 45911608 | 45913777 | 4.37 |
| chr21 | 45929494 | 45930786 | 4.04 |
| chr21 | 45967374 | 45968406 | 4.04 |
| chr21 | 46000827 | 46002046 | 3.36 |
| chr21 | 46038358 | 46039195 | 3.03 |
| chr21 | 46042914 | 46045764 | 7.74 |
| chr21 | 46050494 | 46052867 | 5.05 |
| chr21 | 46063276 | 46065583 | 6.39 |
| chr21 | 46089546 | 46092032 | 5.72 |

|       |          |          |      |
|-------|----------|----------|------|
| chr21 | 46102354 | 46103043 | 2.69 |
| chr21 | 46112151 | 46113644 | 5.05 |
| chr21 | 46219692 | 46220841 | 4.04 |
| chr21 | 46238238 | 46240317 | 5.05 |
| chr21 | 46241269 | 46244069 | 7.74 |
| chr21 | 46246740 | 46249858 | 6.39 |
| chr21 | 46321063 | 46322481 | 3.7  |
| chr21 | 46347032 | 46348687 | 3.7  |
| chr21 | 46359219 | 46360564 | 6.39 |
| chr21 | 46423758 | 46424512 | 2.69 |
| chr21 | 46438345 | 46439190 | 1.68 |
| chr21 | 46455263 | 46457487 | 7.74 |
| chr21 | 46466724 | 46469067 | 7.06 |
| chr21 | 46492711 | 46493772 | 3.36 |
| chr21 | 46502625 | 46503416 | 1.01 |
| chr21 | 46606696 | 46608104 | 5.38 |
| chr21 | 46663126 | 46664053 | 4.37 |
| chr21 | 46731918 | 46732785 | 4.37 |
| chr21 | 46760660 | 46761860 | 3.7  |
| chr21 | 46806338 | 46807310 | 4.04 |
| chr21 | 46820848 | 46821881 | 4.04 |
| chr21 | 46827565 | 46828617 | 3.7  |
| chr21 | 46890776 | 46891741 | 3.7  |
| chr21 | 46932811 | 46934064 | 4.71 |
| chr21 | 46939352 | 46940367 | 4.04 |
| chr21 | 46974150 | 46975217 | 4.71 |
| chr21 | 46998151 | 46999800 | 4.37 |
| chr21 | 47005890 | 47007318 | 4.04 |
| chr21 | 47019792 | 47021455 | 4.04 |
| chr21 | 47022836 | 47024237 | 4.37 |
| chr21 | 47085611 | 47088350 | 4.71 |
| chr21 | 47105118 | 47106186 | 4.71 |
| chr21 | 47128228 | 47129098 | 3.03 |
| chr21 | 47342830 | 47343802 | 3.7  |
| chr21 | 47380790 | 47381608 | 4.04 |
| chr21 | 47383554 | 47385362 | 6.05 |
| chr21 | 47428088 | 47429630 | 3.36 |
| chr21 | 47448819 | 47450593 | 4.71 |
| chr21 | 47481171 | 47482085 | 4.04 |
| chr21 | 47566814 | 47567668 | 3.36 |
| chr21 | 47705147 | 47706420 | 4.37 |
| chr21 | 47711380 | 47712249 | 3.7  |
| chr21 | 47867738 | 47870205 | 4.37 |

|                |          |          |       |
|----------------|----------|----------|-------|
| chr21          | 47888983 | 47889757 | 3.36  |
| chr21          | 47992454 | 47996102 | 7.4   |
| chr21          | 47998206 | 47999341 | 3.36  |
| chr21          | 48000506 | 48005686 | 6.05  |
| chr21          | 48008382 | 48009842 | 3.7   |
| chr21          | 48010307 | 48016247 | 10.09 |
| chr21          | 48055058 | 48055860 | 2.69  |
| 7_gl000205_rar | 37536    | 38644    | 0     |
| 7_gl000205_rar | 78495    | 91498    | 0     |
| 7_gl000205_rar | 92052    | 94024    | 0     |
| 7_gl000205_rar | 94531    | 108769   | 0     |
| 7_gl000205_rar | 109224   | 124138   | 0     |
| 7_gl000205_rar | 129950   | 136179   | 0     |
| 7_gl000205_rar | 159069   | 162044   | 0     |
| 7_gl000205_rar | 162488   | 174518   | 0     |
| chr7           | 112742   | 113749   | 3.36  |
| chr7           | 114093   | 115380   | 4.04  |
| chr7           | 301737   | 302952   | 4.71  |
| chr7           | 312749   | 313956   | 4.37  |
| chr7           | 358915   | 359999   | 1.68  |
| chr7           | 423969   | 424815   | 3.7   |
| chr7           | 435095   | 437166   | 6.05  |
| chr7           | 437379   | 440295   | 5.05  |
| chr7           | 441612   | 442848   | 4.37  |
| chr7           | 457169   | 458679   | 3.36  |
| chr7           | 474586   | 475526   | 3.7   |
| chr7           | 499152   | 499977   | 4.37  |
| chr7           | 577432   | 578679   | 4.04  |
| chr7           | 578889   | 579941   | 3.7   |
| chr7           | 660131   | 661028   | 3.03  |
| chr7           | 680485   | 681901   | 8.75  |
| chr7           | 724901   | 727037   | 5.05  |
| chr7           | 727934   | 729114   | 4.37  |
| chr7           | 744810   | 745657   | 3.36  |
| chr7           | 764771   | 766506   | 4.71  |
| chr7           | 772310   | 773105   | 2.35  |
| chr7           | 906504   | 907616   | 4.04  |
| chr7           | 915802   | 916661   | 3.7   |
| chr7           | 920720   | 921530   | 4.37  |
| chr7           | 980422   | 981741   | 4.71  |
| chr7           | 1014865  | 1015901  | 2.35  |
| chr7           | 1052914  | 1053634  | 4.04  |
| chr7           | 1066636  | 1067777  | 3.7   |

|      |         |         |      |
|------|---------|---------|------|
| chr7 | 1068033 | 1069147 | 4.71 |
| chr7 | 1126192 | 1127969 | 4.71 |
| chr7 | 1135558 | 1136592 | 4.04 |
| chr7 | 1171086 | 1172269 | 4.04 |
| chr7 | 1375825 | 1376954 | 4.37 |
| chr7 | 1441563 | 1443059 | 4.37 |
| chr7 | 1494729 | 1496155 | 4.04 |
| chr7 | 1499932 | 1502040 | 4.37 |
| chr7 | 1576263 | 1577529 | 4.04 |
| chr7 | 1594661 | 1596300 | 4.04 |
| chr7 | 1609079 | 1610384 | 4.04 |
| chr7 | 1628146 | 1629483 | 5.38 |
| chr7 | 1722255 | 1724965 | 4.37 |
| chr7 | 1741987 | 1743106 | 4.37 |
| chr7 | 1749144 | 1750353 | 3.7  |
| chr7 | 1801867 | 1804507 | 5.05 |
| chr7 | 2064345 | 2065726 | 8.41 |
| chr7 | 2067920 | 2069256 | 6.73 |
| chr7 | 2439224 | 2440087 | 4.71 |
| chr7 | 2476342 | 2477452 | 4.04 |
| chr7 | 2561227 | 2562117 | 3.7  |
| chr7 | 2562485 | 2564965 | 4.37 |
| chr7 | 2713038 | 2715612 | 4.71 |
| chr7 | 2728397 | 2729602 | 4.04 |
| chr7 | 2796707 | 2798062 | 6.73 |
| chr7 | 2842333 | 2843354 | 4.04 |
| chr7 | 2915853 | 2916803 | 3.7  |
| chr7 | 2945298 | 2946039 | 3.7  |
| chr7 | 2965788 | 2966601 | 4.37 |
| chr7 | 3148711 | 3149781 | 3.7  |
| chr7 | 3153065 | 3153884 | 4.37 |
| chr7 | 3233853 | 3234569 | 4.04 |
| chr7 | 3255221 | 3256520 | 6.39 |
| chr7 | 3283588 | 3284475 | 3.7  |
| chr7 | 3285525 | 3286994 | 3.36 |
| chr7 | 3436533 | 3437945 | 4.71 |
| chr7 | 3484987 | 3486289 | 6.39 |
| chr7 | 3539439 | 3540685 | 4.04 |
| chr7 | 3545065 | 3546613 | 6.05 |
| chr7 | 3631949 | 3632764 | 3.03 |
| chr7 | 3692601 | 3693565 | 5.38 |
| chr7 | 3778198 | 3779412 | 4.04 |
| chr7 | 3821158 | 3821901 | 1.68 |

|      |         |         |       |
|------|---------|---------|-------|
| chr7 | 3902931 | 3904029 | 3.7   |
| chr7 | 4058091 | 4059398 | 4.37  |
| chr7 | 4159277 | 4160449 | 4.04  |
| chr7 | 4461830 | 4463242 | 6.39  |
| chr7 | 4680898 | 4682139 | 4.71  |
| chr7 | 4698775 | 4700450 | 5.38  |
| chr7 | 4871255 | 4872509 | 3.7   |
| chr7 | 5013390 | 5014814 | 3.36  |
| chr7 | 5090345 | 5092138 | 4.04  |
| chr7 | 5092501 | 5093645 | 4.37  |
| chr7 | 5098768 | 5109979 | 29.94 |
| chr7 | 5132855 | 5136240 | 15.47 |
| chr7 | 5358187 | 5359118 | 3.7   |
| chr7 | 5436146 | 5437401 | 4.37  |
| chr7 | 5450699 | 5451911 | 5.05  |
| chr7 | 5458017 | 5458884 | 4.37  |
| chr7 | 5462741 | 5466089 | 4.71  |
| chr7 | 5466852 | 5469146 | 4.37  |
| chr7 | 5534080 | 5534864 | 3.7   |
| chr7 | 5553277 | 5554481 | 4.71  |
| chr7 | 5568760 | 5570601 | 3.7   |
| chr7 | 5594918 | 5596373 | 4.37  |
| chr7 | 6034799 | 6036101 | 4.04  |
| chr7 | 6097982 | 6098971 | 3.7   |
| chr7 | 6424713 | 6425663 | 4.37  |
| chr7 | 6608852 | 6609831 | 3.7   |
| chr7 | 6629241 | 6630554 | 3.36  |
| chr7 | 6660766 | 6662056 | 5.05  |
| chr7 | 6663051 | 6663899 | 3.7   |
| chr7 | 6703569 | 6709054 | 5.38  |
| chr7 | 6711876 | 6742227 | 25.9  |
| chr7 | 6742460 | 6743966 | 4.37  |
| chr7 | 7038461 | 7039615 | 4.37  |
| chr7 | 7148032 | 7149468 | 7.06  |
| chr7 | 7211407 | 7212428 | 4.04  |
| chr7 | 7240917 | 7242175 | 4.37  |
| chr7 | 7478810 | 7479643 | 3.7   |
| chr7 | 7605456 | 7606385 | 4.71  |
| chr7 | 7679759 | 7681280 | 4.04  |
| chr7 | 7894245 | 7895796 | 4.37  |
| chr7 | 8009075 | 8010022 | 4.71  |
| chr7 | 8035624 | 8037013 | 4.71  |
| chr7 | 8295653 | 8296411 | 4.04  |

|      |          |          |       |
|------|----------|----------|-------|
| chr7 | 8329660  | 8331393  | 3.7   |
| chr7 | 8394614  | 8396938  | 3.7   |
| chr7 | 9426460  | 9427510  | 1.68  |
| chr7 | 10950719 | 10952087 | 5.38  |
| chr7 | 11004252 | 11006685 | 4.04  |
| chr7 | 13291295 | 13292407 | 4.04  |
| chr7 | 13351216 | 13352844 | 8.75  |
| chr7 | 14782328 | 14784234 | 5.05  |
| chr7 | 16844131 | 16845086 | 4.04  |
| chr7 | 16886751 | 16887574 | 3.36  |
| chr7 | 16949695 | 16950773 | 6.05  |
| chr7 | 16984677 | 16985588 | 3.36  |
| chr7 | 16987165 | 16988740 | 3.7   |
| chr7 | 17308457 | 17310343 | 4.71  |
| chr7 | 17433621 | 17435190 | 6.39  |
| chr7 | 17467364 | 17469071 | 4.71  |
| chr7 | 17486454 | 17489290 | 5.72  |
| chr7 | 17714206 | 17715026 | 3.7   |
| chr7 | 17739325 | 17741078 | 5.05  |
| chr7 | 18120873 | 18122018 | 2.69  |
| chr7 | 18301336 | 18302513 | 3.7   |
| chr7 | 19642427 | 19643396 | 4.04  |
| chr7 | 20248256 | 20249221 | 3.36  |
| chr7 | 20370293 | 20371442 | 4.04  |
| chr7 | 20527176 | 20529138 | 2.35  |
| chr7 | 21493289 | 21494985 | 5.38  |
| chr7 | 22659978 | 22660948 | 3.7   |
| chr7 | 22684677 | 22686265 | 7.06  |
| chr7 | 23692944 | 23694806 | 5.05  |
| chr7 | 23872797 | 23873874 | 4.71  |
| chr7 | 23878819 | 23880001 | 4.37  |
| chr7 | 26015718 | 26016925 | 3.7   |
| chr7 | 26237177 | 26238165 | 3.03  |
| chr7 | 26238669 | 26240572 | 4.04  |
| chr7 | 26240877 | 26242056 | 3.7   |
| chr7 | 27779389 | 27780715 | 4.71  |
| chr7 | 29011826 | 29012819 | 5.05  |
| chr7 | 29522629 | 29523518 | 3.7   |
| chr7 | 29947020 | 29948353 | 5.72  |
| chr7 | 30234830 | 30237385 | 7.06  |
| chr7 | 30452890 | 30454281 | 4.37  |
| chr7 | 30614921 | 30616839 | 10.43 |
| chr7 | 30757100 | 30758660 | 4.71  |

|      |          |          |       |
|------|----------|----------|-------|
| chr7 | 31655642 | 31656982 | 4.37  |
| chr7 | 31817781 | 31818766 | 3.7   |
| chr7 | 31838781 | 31839910 | 4.04  |
| chr7 | 31851103 | 31852132 | 3.7   |
| chr7 | 31934358 | 31935126 | 3.36  |
| chr7 | 32099731 | 32100780 | 3.7   |
| chr7 | 32287307 | 32288171 | 3.7   |
| chr7 | 32318101 | 32319041 | 3.36  |
| chr7 | 32344387 | 32345667 | 4.37  |
| chr7 | 32400039 | 32400991 | 2.69  |
| chr7 | 32486125 | 32487779 | 3.7   |
| chr7 | 32526025 | 32526826 | 3.7   |
| chr7 | 32529052 | 32531230 | 4.04  |
| chr7 | 32534696 | 32536784 | 3.7   |
| chr7 | 32554508 | 32562178 | 17.83 |
| chr7 | 32571257 | 32572219 | 4.04  |
| chr7 | 32619538 | 32620540 | 3.7   |
| chr7 | 32707529 | 32708605 | 3.36  |
| chr7 | 32835633 | 32836482 | 3.36  |
| chr7 | 32841134 | 32843564 | 6.73  |
| chr7 | 32930473 | 32932701 | 4.37  |
| chr7 | 32948829 | 32950106 | 4.04  |
| chr7 | 32981471 | 32983738 | 6.05  |
| chr7 | 32984822 | 32991326 | 20.52 |
| chr7 | 32992186 | 32993176 | 3.03  |
| chr7 | 32996622 | 32998231 | 3.7   |
| chr7 | 33101590 | 33102551 | 4.37  |
| chr7 | 33105404 | 33106384 | 3.7   |
| chr7 | 33109251 | 33110827 | 8.07  |
| chr7 | 33114916 | 33115989 | 4.71  |
| chr7 | 33146831 | 33150547 | 3.7   |
| chr7 | 33168556 | 33169380 | 3.36  |
| chr7 | 33175679 | 33176914 | 3.7   |
| chr7 | 33215179 | 33215988 | 3.03  |
| chr7 | 33222433 | 33223516 | 3.7   |
| chr7 | 33249946 | 33252581 | 4.04  |
| chr7 | 33294591 | 33295391 | 3.03  |
| chr7 | 33310193 | 33311580 | 4.37  |
| chr7 | 33316441 | 33320863 | 11.77 |
| chr7 | 33328199 | 33329133 | 3.03  |
| chr7 | 33360112 | 33361123 | 3.7   |
| chr7 | 33490786 | 33491733 | 4.37  |
| chr7 | 33572281 | 33573118 | 3.03  |



|      |          |          |      |
|------|----------|----------|------|
| chr7 | 33577911 | 33579617 | 4.37 |
| chr7 | 33586815 | 33587738 | 4.04 |
| chr7 | 33643765 | 33644734 | 4.04 |
| chr7 | 33708594 | 33709410 | 2.69 |
| chr7 | 33726955 | 33728021 | 4.71 |
| chr7 | 33732317 | 33733893 | 4.04 |
| chr7 | 33737830 | 33742139 | 7.4  |
| chr7 | 33761601 | 33762911 | 3.7  |
| chr7 | 33844059 | 33845064 | 4.04 |
| chr7 | 33870823 | 33873142 | 4.04 |
| chr7 | 33875894 | 33877226 | 3.7  |
| chr7 | 33880935 | 33882355 | 3.7  |
| chr7 | 33893772 | 33894751 | 3.03 |
| chr7 | 33905091 | 33906629 | 4.04 |
| chr7 | 33920995 | 33921826 | 3.7  |
| chr7 | 33934509 | 33935920 | 4.04 |
| chr7 | 33979373 | 33980370 | 3.7  |
| chr7 | 33987751 | 33989523 | 4.37 |
| chr7 | 34000322 | 34002023 | 3.36 |
| chr7 | 34007266 | 34008497 | 4.71 |
| chr7 | 34019651 | 34020610 | 3.7  |
| chr7 | 34021900 | 34023600 | 3.36 |
| chr7 | 34025707 | 34027580 | 4.71 |
| chr7 | 34037031 | 34038859 | 4.71 |
| chr7 | 34043885 | 34044770 | 3.03 |
| chr7 | 34045542 | 34046773 | 3.7  |
| chr7 | 34047239 | 34048584 | 4.37 |
| chr7 | 34057796 | 34058808 | 3.7  |
| chr7 | 34061320 | 34062486 | 4.37 |
| chr7 | 34066457 | 34067450 | 4.04 |
| chr7 | 34068014 | 34069218 | 4.04 |
| chr7 | 34070362 | 34077624 | 4.71 |
| chr7 | 34083012 | 34085422 | 4.04 |
| chr7 | 34087489 | 34089876 | 3.36 |
| chr7 | 34090278 | 34092886 | 4.37 |
| chr7 | 34096822 | 34099513 | 3.7  |
| chr7 | 34100025 | 34101718 | 4.04 |
| chr7 | 34102111 | 34103071 | 3.7  |
| chr7 | 34103656 | 34104974 | 4.37 |
| chr7 | 34106524 | 34111779 | 4.71 |
| chr7 | 34124666 | 34126392 | 4.04 |
| chr7 | 34132474 | 34133688 | 3.7  |
| chr7 | 34141872 | 34143514 | 4.04 |

|      |          |          |       |
|------|----------|----------|-------|
| chr7 | 34154542 | 34156467 | 4.37  |
| chr7 | 34160291 | 34165206 | 5.38  |
| chr7 | 34165670 | 34166688 | 3.36  |
| chr7 | 34169354 | 34170746 | 4.37  |
| chr7 | 34174640 | 34175468 | 4.04  |
| chr7 | 34180274 | 34181151 | 3.36  |
| chr7 | 34181449 | 34182915 | 3.36  |
| chr7 | 34194800 | 34195664 | 3.36  |
| chr7 | 34203055 | 34203956 | 3.36  |
| chr7 | 34205589 | 34206456 | 4.04  |
| chr7 | 34230423 | 34231698 | 4.37  |
| chr7 | 34235448 | 34236393 | 3.03  |
| chr7 | 34275403 | 34276652 | 4.71  |
| chr7 | 34307469 | 34309578 | 4.37  |
| chr7 | 34311992 | 34312884 | 3.7   |
| chr7 | 34320749 | 34324283 | 6.05  |
| chr7 | 34334116 | 34335600 | 3.7   |
| chr7 | 34337508 | 34339105 | 4.04  |
| chr7 | 34348152 | 34349250 | 4.04  |
| chr7 | 34349948 | 34352242 | 5.38  |
| chr7 | 34360092 | 34361479 | 7.74  |
| chr7 | 34375735 | 34377544 | 4.71  |
| chr7 | 34377945 | 34379284 | 4.71  |
| chr7 | 34380066 | 34381810 | 4.04  |
| chr7 | 34413922 | 34415923 | 3.7   |
| chr7 | 34418921 | 34425377 | 12.78 |
| chr7 | 34436565 | 34437542 | 3.36  |
| chr7 | 34502623 | 34504255 | 5.05  |
| chr7 | 34524161 | 34525054 | 3.36  |
| chr7 | 34526871 | 34528636 | 4.37  |
| chr7 | 34565233 | 34567633 | 4.04  |
| chr7 | 34574689 | 34575708 | 3.36  |
| chr7 | 34576817 | 34577677 | 4.04  |
| chr7 | 34577984 | 34579737 | 6.39  |
| chr7 | 34586291 | 34587101 | 3.7   |
| chr7 | 34593719 | 34595928 | 6.73  |
| chr7 | 34601947 | 34603704 | 3.7   |
| chr7 | 34614274 | 34615372 | 4.04  |
| chr7 | 34621592 | 34624270 | 6.05  |
| chr7 | 34626751 | 34628815 | 3.36  |
| chr7 | 34639492 | 34640714 | 4.04  |
| chr7 | 34641663 | 34642894 | 3.36  |
| chr7 | 34731813 | 34732657 | 4.04  |

|      |          |          |       |
|------|----------|----------|-------|
| chr7 | 34741852 | 34742757 | 4.04  |
| chr7 | 34749008 | 34750141 | 5.05  |
| chr7 | 34779765 | 34782821 | 5.05  |
| chr7 | 34787534 | 34789028 | 5.38  |
| chr7 | 34815521 | 34818183 | 6.05  |
| chr7 | 34821766 | 34823835 | 6.05  |
| chr7 | 34843215 | 34844029 | 4.04  |
| chr7 | 34925760 | 34926847 | 4.04  |
| chr7 | 34934230 | 34937165 | 9.75  |
| chr7 | 34955385 | 34956604 | 4.04  |
| chr7 | 35064338 | 35066352 | 5.05  |
| chr7 | 35071959 | 35073666 | 4.04  |
| chr7 | 35258936 | 35259831 | 3.36  |
| chr7 | 35262588 | 35263777 | 4.37  |
| chr7 | 36187845 | 36188763 | 3.36  |
| chr7 | 39701062 | 39702537 | 4.71  |
| chr7 | 39753425 | 39755294 | 7.4   |
| chr7 | 39789747 | 39790681 | 3.7   |
| chr7 | 39921352 | 39922555 | 4.37  |
| chr7 | 40186780 | 40187695 | 3.7   |
| chr7 | 41563612 | 41564415 | 4.04  |
| chr7 | 41794061 | 41797144 | 10.76 |
| chr7 | 41904556 | 41906001 | 5.38  |
| chr7 | 42565164 | 42565943 | 4.04  |
| chr7 | 42583400 | 42586395 | 6.73  |
| chr7 | 42861148 | 42862189 | 4.37  |
| chr7 | 42895917 | 42897024 | 2.69  |
| chr7 | 42995285 | 42996337 | 4.71  |
| chr7 | 42998724 | 42999934 | 4.71  |
| chr7 | 43330518 | 43331497 | 4.71  |
| chr7 | 43707050 | 43708112 | 5.05  |
| chr7 | 43714112 | 43715120 | 3.7   |
| chr7 | 43768527 | 43769700 | 4.71  |
| chr7 | 43804126 | 43805189 | 3.7   |
| chr7 | 43847895 | 43848701 | 3.36  |
| chr7 | 43870194 | 43871343 | 5.38  |
| chr7 | 43884327 | 43885247 | 4.04  |
| chr7 | 44759447 | 44760861 | 10.09 |
| chr7 | 44822822 | 44823660 | 3.7   |
| chr7 | 44836059 | 44837236 | 4.04  |
| chr7 | 45327347 | 45329752 | 5.38  |
| chr7 | 45361762 | 45362941 | 5.05  |
| chr7 | 45364201 | 45365284 | 4.37  |

|      |          |          |       |
|------|----------|----------|-------|
| chr7 | 45386961 | 45388359 | 3.7   |
| chr7 | 45439719 | 45440693 | 3.03  |
| chr7 | 45442543 | 45444002 | 4.37  |
| chr7 | 45543606 | 45545150 | 5.05  |
| chr7 | 45547210 | 45549000 | 6.73  |
| chr7 | 45575410 | 45576214 | 4.04  |
| chr7 | 45577384 | 45579450 | 4.71  |
| chr7 | 45598790 | 45599838 | 4.04  |
| chr7 | 45655121 | 45656424 | 4.04  |
| chr7 | 46299675 | 46300690 | 4.04  |
| chr7 | 46500542 | 46501632 | 5.05  |
| chr7 | 46504425 | 46511731 | 18.16 |
| chr7 | 46565632 | 46567919 | 9.08  |
| chr7 | 46808266 | 46809847 | 3.7   |
| chr7 | 46865437 | 46866387 | 3.36  |
| chr7 | 47002801 | 47004639 | 4.71  |
| chr7 | 47635584 | 47637985 | 13.12 |
| chr7 | 47708564 | 47709361 | 3.03  |
| chr7 | 50269169 | 50270152 | 2.35  |
| chr7 | 50650645 | 50651916 | 6.39  |
| chr7 | 51034993 | 51035939 | 3.7   |
| chr7 | 51331016 | 51331848 | 3.36  |
| chr7 | 53281738 | 53282958 | 5.72  |
| chr7 | 53409172 | 53410432 | 7.06  |
| chr7 | 55453783 | 55456052 | 9.08  |
| chr7 | 55864605 | 55865872 | 5.72  |
| chr7 | 55890409 | 55891679 | 4.71  |
| chr7 | 56006252 | 56007912 | 5.38  |
| chr7 | 56441047 | 56441439 | 11.1  |
| chr7 | 56533217 | 56536582 | 9.42  |
| chr7 | 56690589 | 56691748 | 5.72  |
| chr7 | 56706603 | 56707790 | 4.37  |
| chr7 | 56753649 | 56754707 | 4.71  |
| chr7 | 57232338 | 57234214 | 5.38  |
| chr7 | 57527692 | 57530915 | 5.38  |
| chr7 | 57547262 | 57548687 | 4.37  |
| chr7 | 57554693 | 57555868 | 5.38  |
| chr7 | 57993599 | 57994917 | 6.05  |
| chr7 | 58007987 | 58009223 | 9.08  |
| chr7 | 61054268 | 61055217 | 4.37  |
| chr7 | 61078635 | 61080048 | 6.39  |
| chr7 | 61080716 | 61082033 | 4.37  |
| chr7 | 61084291 | 61085937 | 4.71  |

|      |          |          |       |
|------|----------|----------|-------|
| chr7 | 61099247 | 61100366 | 2.69  |
| chr7 | 61510477 | 61513980 | 5.05  |
| chr7 | 61528107 | 61529713 | 3.36  |
| chr7 | 61529950 | 61531796 | 5.05  |
| chr7 | 61536541 | 61537965 | 4.04  |
| chr7 | 61539828 | 61541896 | 5.05  |
| chr7 | 61542507 | 61550653 | 7.06  |
| chr7 | 61551496 | 61555766 | 5.38  |
| chr7 | 61556042 | 61560433 | 6.39  |
| chr7 | 61744122 | 61745067 | 3.7   |
| chr7 | 61746366 | 61747652 | 5.72  |
| chr7 | 61782434 | 61784937 | 3.7   |
| chr7 | 61789067 | 61790346 | 4.04  |
| chr7 | 61791048 | 61792548 | 7.06  |
| chr7 | 61793926 | 61795237 | 7.4   |
| chr7 | 61795725 | 61799582 | 6.39  |
| chr7 | 61814937 | 61816552 | 4.37  |
| chr7 | 61845468 | 61846684 | 3.03  |
| chr7 | 61847149 | 61848498 | 5.05  |
| chr7 | 61854972 | 61856436 | 4.37  |
| chr7 | 61865591 | 61899555 | 10.09 |
| chr7 | 61902975 | 61917234 | 9.75  |
| chr7 | 61967007 | 61973779 | 55.83 |
| chr7 | 61974872 | 61978152 | 20.52 |
| chr7 | 61979155 | 61981820 | 7.74  |
| chr7 | 61982135 | 61986976 | 11.44 |
| chr7 | 61990037 | 61991441 | 6.05  |
| chr7 | 61997058 | 61997871 | 5.38  |
| chr7 | 62007456 | 62008777 | 6.05  |
| chr7 | 62021493 | 62022342 | 7.4   |
| chr7 | 62041716 | 62043470 | 4.04  |
| chr7 | 62043849 | 62045268 | 4.04  |
| chr7 | 62053210 | 62054558 | 3.7   |
| chr7 | 62060827 | 62061939 | 4.37  |
| chr7 | 62074948 | 62076126 | 4.04  |
| chr7 | 62084475 | 62089220 | 5.72  |
| chr7 | 62092368 | 62093724 | 3.36  |
| chr7 | 62096106 | 62097509 | 4.37  |
| chr7 | 62104393 | 62111296 | 5.05  |
| chr7 | 62113501 | 62127233 | 7.06  |
| chr7 | 62136926 | 62138083 | 3.36  |
| chr7 | 62140145 | 62144838 | 4.37  |
| chr7 | 62145923 | 62156002 | 6.39  |

|      |          |          |      |
|------|----------|----------|------|
| chr7 | 62157526 | 62158838 | 4.71 |
| chr7 | 62159598 | 62167248 | 7.4  |
| chr7 | 62168605 | 62169588 | 4.71 |
| chr7 | 62170679 | 62180426 | 5.72 |
| chr7 | 62182875 | 62188871 | 5.38 |
| chr7 | 62190576 | 62197114 | 6.05 |
| chr7 | 62203270 | 62215405 | 5.38 |
| chr7 | 62215642 | 62220643 | 4.71 |
| chr7 | 62221102 | 62222634 | 4.37 |
| chr7 | 62224019 | 62230904 | 5.72 |
| chr7 | 62232732 | 62235601 | 4.71 |
| chr7 | 62235911 | 62242740 | 5.72 |
| chr7 | 62244088 | 62244951 | 3.7  |
| chr7 | 62245494 | 62248953 | 4.71 |
| chr7 | 62249330 | 62254315 | 4.71 |
| chr7 | 62256099 | 62259525 | 4.04 |
| chr7 | 62261104 | 62262435 | 5.05 |
| chr7 | 62262687 | 62281548 | 6.73 |
| chr7 | 62286055 | 62290262 | 5.05 |
| chr7 | 62293205 | 62296767 | 6.05 |
| chr7 | 62297955 | 62300850 | 4.04 |
| chr7 | 62301127 | 62303921 | 4.37 |
| chr7 | 62304154 | 62312289 | 5.72 |
| chr7 | 62312812 | 62315409 | 3.7  |
| chr7 | 62317499 | 62319015 | 3.7  |
| chr7 | 62325180 | 62329718 | 4.71 |
| chr7 | 62330343 | 62331333 | 3.36 |
| chr7 | 62332171 | 62332989 | 3.36 |
| chr7 | 62336546 | 62342686 | 5.05 |
| chr7 | 62342916 | 62352715 | 4.71 |
| chr7 | 62354710 | 62360105 | 6.73 |
| chr7 | 62365882 | 62369435 | 4.04 |
| chr7 | 62375833 | 62379148 | 5.38 |
| chr7 | 62380904 | 62383952 | 4.71 |
| chr7 | 62384227 | 62385542 | 4.37 |
| chr7 | 62386651 | 62394372 | 5.72 |
| chr7 | 62394705 | 62396710 | 3.7  |
| chr7 | 62397437 | 62402229 | 4.04 |
| chr7 | 62402762 | 62409889 | 5.05 |
| chr7 | 62414051 | 62421011 | 6.05 |
| chr7 | 62421603 | 62424005 | 5.05 |
| chr7 | 62424533 | 62425998 | 4.71 |
| chr7 | 62427044 | 62430300 | 5.05 |

|      |          |          |      |
|------|----------|----------|------|
| chr7 | 62432442 | 62437102 | 5.05 |
| chr7 | 62437959 | 62446010 | 5.38 |
| chr7 | 62447456 | 62453688 | 5.72 |
| chr7 | 62475641 | 62476458 | 3.36 |
| chr7 | 62478622 | 62479388 | 3.36 |
| chr7 | 62546319 | 62549223 | 6.05 |
| chr7 | 63328155 | 63329095 | 4.04 |
| chr7 | 63335372 | 63338381 | 6.73 |
| chr7 | 63341687 | 63342846 | 4.04 |
| chr7 | 63362159 | 63362957 | 3.7  |
| chr7 | 63370613 | 63371534 | 3.7  |
| chr7 | 63413889 | 63414694 | 2.35 |
| chr7 | 63475444 | 63476891 | 4.37 |
| chr7 | 63492938 | 63493822 | 4.04 |
| chr7 | 63520856 | 63521694 | 4.04 |
| chr7 | 63537252 | 63541017 | 8.07 |
| chr7 | 63656360 | 63657555 | 4.37 |
| chr7 | 63683425 | 63685329 | 5.05 |
| chr7 | 63726262 | 63727911 | 5.38 |
| chr7 | 63728800 | 63730022 | 3.7  |
| chr7 | 63777149 | 63778127 | 3.7  |
| chr7 | 63781018 | 63782517 | 3.03 |
| chr7 | 63784285 | 63785665 | 4.71 |
| chr7 | 63786675 | 63788286 | 3.7  |
| chr7 | 63790962 | 63793858 | 5.38 |
| chr7 | 63795620 | 63796510 | 4.37 |
| chr7 | 63801681 | 63803248 | 4.04 |
| chr7 | 63804131 | 63805348 | 4.04 |
| chr7 | 63805953 | 63811767 | 7.4  |
| chr7 | 63812278 | 63813746 | 4.37 |
| chr7 | 63816924 | 63818225 | 5.05 |
| chr7 | 63821723 | 63825954 | 5.38 |
| chr7 | 63968699 | 63970944 | 7.4  |
| chr7 | 63977745 | 63983882 | 8.41 |
| chr7 | 63985700 | 63987270 | 4.04 |
| chr7 | 63987963 | 63990137 | 4.71 |
| chr7 | 63993672 | 63994747 | 4.37 |
| chr7 | 63996280 | 63998220 | 5.05 |
| chr7 | 64005949 | 64008224 | 4.04 |
| chr7 | 64016489 | 64017514 | 3.7  |
| chr7 | 64017729 | 64019669 | 4.71 |
| chr7 | 64073633 | 64074803 | 4.71 |
| chr7 | 64077525 | 64082920 | 6.39 |

|      |          |          |       |
|------|----------|----------|-------|
| chr7 | 64094148 | 64095021 | 4.04  |
| chr7 | 64101850 | 64102999 | 3.7   |
| chr7 | 64133477 | 64137357 | 4.71  |
| chr7 | 64140491 | 64142605 | 4.71  |
| chr7 | 64143519 | 64146178 | 3.7   |
| chr7 | 64148934 | 64151150 | 4.71  |
| chr7 | 64153719 | 64155197 | 3.36  |
| chr7 | 64162635 | 64163503 | 3.36  |
| chr7 | 64164404 | 64173363 | 8.07  |
| chr7 | 64179874 | 64180910 | 3.36  |
| chr7 | 64202230 | 64203312 | 4.04  |
| chr7 | 64207786 | 64209199 | 7.4   |
| chr7 | 64218089 | 64219314 | 4.37  |
| chr7 | 64236983 | 64237962 | 3.36  |
| chr7 | 64267103 | 64268556 | 3.7   |
| chr7 | 64291786 | 64292951 | 4.37  |
| chr7 | 64331184 | 64332932 | 4.71  |
| chr7 | 64333947 | 64335236 | 4.04  |
| chr7 | 64336152 | 64338349 | 4.71  |
| chr7 | 64338793 | 64344191 | 4.71  |
| chr7 | 64371869 | 64372745 | 4.37  |
| chr7 | 64373869 | 64374661 | 4.04  |
| chr7 | 64375240 | 64376269 | 3.7   |
| chr7 | 64376661 | 64377801 | 4.37  |
| chr7 | 64379504 | 64381673 | 4.71  |
| chr7 | 64382252 | 64385795 | 5.72  |
| chr7 | 64386304 | 64393030 | 5.05  |
| chr7 | 64426001 | 64427090 | 3.7   |
| chr7 | 64430009 | 64430896 | 4.37  |
| chr7 | 64434343 | 64435735 | 4.04  |
| chr7 | 64436661 | 64442303 | 6.39  |
| chr7 | 64449918 | 64452136 | 7.06  |
| chr7 | 64452681 | 64460678 | 6.05  |
| chr7 | 64461564 | 64464026 | 4.04  |
| chr7 | 64466300 | 64467607 | 4.71  |
| chr7 | 64739123 | 64740294 | 6.73  |
| chr7 | 65420388 | 65421499 | 4.04  |
| chr7 | 65446604 | 65447791 | 3.7   |
| chr7 | 65729575 | 65732171 | 11.44 |
| chr7 | 65785918 | 65786976 | 5.38  |
| chr7 | 66716929 | 66717790 | 6.05  |
| chr7 | 67069393 | 67070999 | 5.72  |
| chr7 | 67583893 | 67585229 | 2.02  |



|      |          |          |       |
|------|----------|----------|-------|
| chr7 | 67795113 | 67796437 | 3.7   |
| chr7 | 68465859 | 68466641 | 3.7   |
| chr7 | 70264007 | 70265976 | 6.39  |
| chr7 | 70515040 | 70516227 | 3.36  |
| chr7 | 72224998 | 72226473 | 5.72  |
| chr7 | 72311328 | 72312418 | 3.7   |
| chr7 | 72801007 | 72803045 | 8.75  |
| chr7 | 73156487 | 73157526 | 4.04  |
| chr7 | 73160253 | 73161557 | 4.71  |
| chr7 | 73202897 | 73204352 | 11.77 |
| chr7 | 73377263 | 73378578 | 7.06  |
| chr7 | 73588191 | 73589068 | 3.7   |
| chr7 | 73725283 | 73725929 | 5.38  |
| chr7 | 73994265 | 73995141 | 3.36  |
| chr7 | 75256759 | 75257687 | 3.03  |
| chr7 | 75271937 | 75272868 | 4.04  |
| chr7 | 75434761 | 75437689 | 14.8  |
| chr7 | 75563208 | 75564265 | 5.05  |
| chr7 | 75920414 | 75921713 | 4.04  |
| chr7 | 75931573 | 75932480 | 4.71  |
| chr7 | 75987556 | 75988852 | 2.69  |
| chr7 | 76837944 | 76839754 | 4.04  |
| chr7 | 77435552 | 77437342 | 4.37  |
| chr7 | 77448017 | 77449174 | 3.7   |
| chr7 | 77449405 | 77452168 | 6.05  |
| chr7 | 79361630 | 79362679 | 2.02  |
| chr7 | 79643655 | 79644513 | 1.68  |
| chr7 | 80172962 | 80173783 | 3.03  |
| chr7 | 80192383 | 80194390 | 4.71  |
| chr7 | 80202524 | 80204148 | 4.71  |
| chr7 | 80496593 | 80497480 | 2.02  |
| chr7 | 80505811 | 80506824 | 4.71  |
| chr7 | 80512283 | 80513661 | 4.37  |
| chr7 | 80549110 | 80551920 | 4.37  |
| chr7 | 80571207 | 80572457 | 3.7   |
| chr7 | 80577787 | 80579925 | 4.71  |
| chr7 | 80788246 | 80789552 | 5.72  |
| chr7 | 80851681 | 80852761 | 4.37  |
| chr7 | 80853111 | 80854734 | 4.37  |
| chr7 | 80861190 | 80862746 | 3.7   |
| chr7 | 80888907 | 80890660 | 7.06  |
| chr7 | 80913942 | 80914979 | 3.36  |
| chr7 | 80928193 | 80929124 | 3.36  |

|      |          |          |       |
|------|----------|----------|-------|
| chr7 | 81938683 | 81939546 | 3.7   |
| chr7 | 84165597 | 84166439 | 2.69  |
| chr7 | 84185365 | 84186191 | 3.36  |
| chr7 | 84241824 | 84242925 | 1.01  |
| chr7 | 84260888 | 84261762 | 3.03  |
| chr7 | 85374617 | 85375622 | 3.36  |
| chr7 | 85630721 | 85631529 | 3.03  |
| chr7 | 86020896 | 86021916 | 4.04  |
| chr7 | 86720798 | 86721905 | 3.36  |
| chr7 | 86781230 | 86782551 | 5.38  |
| chr7 | 86833614 | 86835983 | 12.78 |
| chr7 | 86953370 | 86954187 | 3.7   |
| chr7 | 86955682 | 86959133 | 8.75  |
| chr7 | 86982567 | 86985039 | 14.13 |
| chr7 | 87298147 | 87299740 | 4.71  |
| chr7 | 87395339 | 87398019 | 4.71  |
| chr7 | 87504572 | 87506261 | 5.05  |
| chr7 | 87659007 | 87660059 | 3.36  |
| chr7 | 87882392 | 87884162 | 4.71  |
| chr7 | 87915956 | 87917232 | 4.71  |
| chr7 | 88174290 | 88176443 | 4.37  |
| chr7 | 88479829 | 88482005 | 4.37  |
| chr7 | 88640138 | 88642381 | 7.06  |
| chr7 | 88656678 | 88657871 | 5.05  |
| chr7 | 88753126 | 88754042 | 3.7   |
| chr7 | 88874161 | 88877889 | 7.4   |
| chr7 | 89228997 | 89230766 | 3.7   |
| chr7 | 89326666 | 89327556 | 3.7   |
| chr7 | 89486637 | 89487941 | 4.04  |
| chr7 | 89805040 | 89806394 | 4.04  |
| chr7 | 89840563 | 89841578 | 2.69  |
| chr7 | 89975503 | 89976400 | 3.36  |
| chr7 | 89987928 | 89988856 | 3.36  |
| chr7 | 90062361 | 90063781 | 5.72  |
| chr7 | 90093223 | 90094055 | 4.04  |
| chr7 | 90423149 | 90423985 | 5.72  |
| chr7 | 90892994 | 90894741 | 4.71  |
| chr7 | 91017196 | 91018460 | 4.04  |
| chr7 | 91509263 | 91510776 | 5.05  |
| chr7 | 91639176 | 91640166 | 4.37  |
| chr7 | 91818743 | 91820732 | 4.71  |
| chr7 | 91874596 | 91875620 | 4.04  |
| chr7 | 91911804 | 91912641 | 3.03  |

|      |          |          |       |
|------|----------|----------|-------|
| chr7 | 92219116 | 92219960 | 4.71  |
| chr7 | 92496082 | 92499163 | 4.71  |
| chr7 | 92511050 | 92512996 | 6.05  |
| chr7 | 92563155 | 92564192 | 4.71  |
| chr7 | 92566468 | 92572470 | 5.38  |
| chr7 | 92585031 | 92585860 | 3.03  |
| chr7 | 92616391 | 92617304 | 3.36  |
| chr7 | 92621925 | 92622925 | 4.04  |
| chr7 | 92661041 | 92661903 | 4.37  |
| chr7 | 92756249 | 92757554 | 6.73  |
| chr7 | 92791217 | 92792071 | 3.36  |
| chr7 | 92800335 | 92801923 | 7.06  |
| chr7 | 93050291 | 93051142 | 3.7   |
| chr7 | 94467616 | 94468904 | 5.72  |
| chr7 | 94506986 | 94507977 | 4.37  |
| chr7 | 96341854 | 96343013 | 3.36  |
| chr7 | 96767948 | 96769238 | 5.05  |
| chr7 | 97068533 | 97069900 | 7.4   |
| chr7 | 97090434 | 97091563 | 4.04  |
| chr7 | 97500993 | 97502149 | 4.04  |
| chr7 | 97725326 | 97728416 | 10.09 |
| chr7 | 97735474 | 97736815 | 5.05  |
| chr7 | 97797532 | 97798582 | 3.7   |
| chr7 | 97983236 | 97984552 | 5.38  |
| chr7 | 98029721 | 98031120 | 5.38  |
| chr7 | 98125777 | 98126652 | 7.06  |
| chr7 | 98248841 | 98249864 | 3.36  |
| chr7 | 98267939 | 98269099 | 3.03  |
| chr7 | 98316633 | 98317610 | 4.37  |
| chr7 | 98358073 | 98359043 | 2.69  |
| chr7 | 98394249 | 98395730 | 5.05  |
| chr7 | 98695374 | 98697424 | 4.71  |
| chr7 | 99063264 | 99064303 | 4.37  |
| chr7 | 99090707 | 99092686 | 9.42  |
| chr7 | 99125823 | 99127349 | 3.36  |
| chr7 | 99127986 | 99132056 | 14.46 |
| chr7 | 99137025 | 99141663 | 8.75  |
| chr7 | 99144874 | 99146238 | 4.04  |
| chr7 | 99213651 | 99214735 | 5.05  |
| chr7 | 99535583 | 99536580 | 4.71  |
| chr7 | 99619912 | 99621203 | 5.38  |
| chr7 | 99667124 | 99671826 | 15.47 |
| chr7 | 99672326 | 99673380 | 3.7   |

|      |           |           |      |
|------|-----------|-----------|------|
| chr7 | 99678624  | 99679913  | 5.05 |
| chr7 | 99697734  | 99699577  | 3.7  |
| chr7 | 99719711  | 99720721  | 3.36 |
| chr7 | 99723629  | 99725161  | 3.7  |
| chr7 | 100033423 | 100034604 | 4.04 |
| chr7 | 100302915 | 100304221 | 4.37 |
| chr7 | 100389556 | 100390386 | 3.36 |
| chr7 | 100391516 | 100392530 | 3.36 |
| chr7 | 100399326 | 100401554 | 4.71 |
| chr7 | 100465884 | 100466668 | 2.69 |
| chr7 | 100486283 | 100488286 | 4.04 |
| chr7 | 100549087 | 100550070 | 3.7  |
| chr7 | 100607215 | 100608291 | 3.03 |
| chr7 | 100609038 | 100611380 | 4.37 |
| chr7 | 100616194 | 100617777 | 4.04 |
| chr7 | 100618107 | 100619015 | 4.04 |
| chr7 | 100634517 | 100636016 | 4.37 |
| chr7 | 100675596 | 100676922 | 4.04 |
| chr7 | 100685653 | 100686844 | 3.7  |
| chr7 | 100702207 | 100703245 | 4.04 |
| chr7 | 100727823 | 100729265 | 4.37 |
| chr7 | 100740530 | 100741439 | 4.37 |
| chr7 | 100769363 | 100770538 | 4.04 |
| chr7 | 100805843 | 100809205 | 3.7  |
| chr7 | 100815506 | 100816366 | 3.36 |
| chr7 | 100860106 | 100861175 | 3.7  |
| chr7 | 100887325 | 100888837 | 3.7  |
| chr7 | 100894907 | 100896098 | 4.37 |
| chr7 | 100943715 | 100945719 | 4.04 |
| chr7 | 100951069 | 100952348 | 4.37 |
| chr7 | 100953530 | 100954429 | 5.38 |
| chr7 | 101029748 | 101030723 | 2.69 |
| chr7 | 101051060 | 101054102 | 8.75 |
| chr7 | 101121416 | 101124542 | 6.39 |
| chr7 | 101137478 | 101138286 | 2.02 |
| chr7 | 101175539 | 101177630 | 2.35 |
| chr7 | 101206651 | 101207741 | 2.02 |
| chr7 | 101216088 | 101217236 | 4.37 |
| chr7 | 101221588 | 101222740 | 4.71 |
| chr7 | 101251474 | 101252786 | 5.38 |
| chr7 | 101367140 | 101368350 | 3.7  |
| chr7 | 101372532 | 101373446 | 4.37 |
| chr7 | 101457024 | 101459508 | 5.05 |

|      |           |           |       |
|------|-----------|-----------|-------|
| chr7 | 101490094 | 101491354 | 5.05  |
| chr7 | 101499725 | 101501149 | 3.7   |
| chr7 | 101513263 | 101515148 | 5.38  |
| chr7 | 101525913 | 101526953 | 3.7   |
| chr7 | 101528086 | 101529032 | 3.7   |
| chr7 | 101572427 | 101574434 | 4.04  |
| chr7 | 101587668 | 101588796 | 4.71  |
| chr7 | 101616104 | 101617160 | 4.04  |
| chr7 | 101618346 | 101619760 | 4.37  |
| chr7 | 101958943 | 101960061 | 4.71  |
| chr7 | 102056015 | 102056951 | 4.71  |
| chr7 | 102515771 | 102517245 | 4.71  |
| chr7 | 102579259 | 102580076 | 1.68  |
| chr7 | 102642897 | 102643905 | 2.69  |
| chr7 | 102688524 | 102692992 | 13.12 |
| chr7 | 102788487 | 102790886 | 5.38  |
| chr7 | 102984580 | 102985837 | 4.04  |
| chr7 | 103032158 | 103033180 | 5.38  |
| chr7 | 103673030 | 103673831 | 1.68  |
| chr7 | 103674734 | 103676085 | 3.7   |
| chr7 | 103736709 | 103737550 | 1.35  |
| chr7 | 103818979 | 103821289 | 8.75  |
| chr7 | 103860134 | 103861576 | 5.05  |
| chr7 | 103946691 | 103947731 | 2.02  |
| chr7 | 103968717 | 103969573 | 2.69  |
| chr7 | 104192219 | 104193392 | 4.04  |
| chr7 | 104468199 | 104469066 | 2.02  |
| chr7 | 104523505 | 104524509 | 3.7   |
| chr7 | 104561927 | 104564154 | 3.36  |
| chr7 | 104603725 | 104605173 | 4.37  |
| chr7 | 104621232 | 104622468 | 4.04  |
| chr7 | 104643993 | 104645295 | 3.7   |
| chr7 | 104652676 | 104655591 | 4.71  |
| chr7 | 104657331 | 104658303 | 3.36  |
| chr7 | 104906205 | 104907019 | 3.03  |
| chr7 | 105028757 | 105030442 | 3.7   |
| chr7 | 105172109 | 105174038 | 4.71  |
| chr7 | 105258731 | 105259669 | 1.68  |
| chr7 | 105305276 | 105306138 | 3.7   |
| chr7 | 105351343 | 105353395 | 11.77 |
| chr7 | 105402129 | 105403237 | 4.37  |
| chr7 | 105559038 | 105559900 | 3.03  |
| chr7 | 105564290 | 105565600 | 4.37  |

|      |           |           |      |
|------|-----------|-----------|------|
| chr7 | 105581670 | 105582512 | 3.36 |
| chr7 | 105591400 | 105593308 | 4.71 |
| chr7 | 105637082 | 105638408 | 4.04 |
| chr7 | 105648658 | 105650563 | 5.72 |
| chr7 | 105681260 | 105682503 | 4.37 |
| chr7 | 105689771 | 105690827 | 3.7  |
| chr7 | 105705407 | 105707051 | 3.7  |
| chr7 | 105711675 | 105713531 | 3.7  |
| chr7 | 105751817 | 105753628 | 5.05 |
| chr7 | 105801479 | 105804712 | 5.05 |
| chr7 | 105820350 | 105821413 | 2.02 |
| chr7 | 105841545 | 105842566 | 4.04 |
| chr7 | 105865511 | 105866737 | 3.03 |
| chr7 | 105887579 | 105888294 | 4.04 |
| chr7 | 105968063 | 105968916 | 3.7  |
| chr7 | 105975831 | 105979083 | 6.39 |
| chr7 | 105982133 | 105984015 | 4.71 |
| chr7 | 106072261 | 106072917 | 2.35 |
| chr7 | 106083460 | 106084293 | 3.7  |
| chr7 | 106090422 | 106095125 | 8.41 |
| chr7 | 106097600 | 106100863 | 8.75 |
| chr7 | 106114486 | 106115767 | 4.37 |
| chr7 | 106149301 | 106150273 | 3.7  |
| chr7 | 106252765 | 106253523 | 3.7  |
| chr7 | 106300204 | 106301819 | 4.37 |
| chr7 | 106319692 | 106320506 | 3.36 |
| chr7 | 106437468 | 106439096 | 8.41 |
| chr7 | 106452220 | 106453699 | 2.02 |
| chr7 | 106469545 | 106470518 | 5.05 |
| chr7 | 106634723 | 106635659 | 3.36 |
| chr7 | 106999559 | 107001586 | 7.74 |
| chr7 | 107146264 | 107147715 | 3.7  |
| chr7 | 107184245 | 107185739 | 3.7  |
| chr7 | 107220551 | 107221458 | 3.03 |
| chr7 | 107300866 | 107302804 | 3.36 |
| chr7 | 107332040 | 107332802 | 2.35 |
| chr7 | 107383445 | 107384765 | 4.71 |
| chr7 | 107589015 | 107590800 | 5.38 |
| chr7 | 107592253 | 107593702 | 4.04 |
| chr7 | 107833092 | 107833924 | 2.02 |
| chr7 | 107839802 | 107841252 | 3.7  |
| chr7 | 107939571 | 107940568 | 4.04 |
| chr7 | 107987669 | 107988624 | 3.36 |

|      |           |           |       |
|------|-----------|-----------|-------|
| chr7 | 107991808 | 107993654 | 3.7   |
| chr7 | 108094591 | 108097614 | 5.05  |
| chr7 | 108196532 | 108198248 | 4.04  |
| chr7 | 108209213 | 108210823 | 4.37  |
| chr7 | 108218982 | 108221235 | 9.08  |
| chr7 | 108221611 | 108223120 | 4.04  |
| chr7 | 108250804 | 108251836 | 3.36  |
| chr7 | 108267252 | 108268571 | 4.04  |
| chr7 | 108502914 | 108504139 | 5.05  |
| chr7 | 108568477 | 108569922 | 4.71  |
| chr7 | 108771986 | 108774225 | 4.37  |
| chr7 | 108951745 | 108952488 | 4.71  |
| chr7 | 109239640 | 109240873 | 3.7   |
| chr7 | 109271630 | 109273557 | 4.37  |
| chr7 | 109788658 | 109790132 | 3.36  |
| chr7 | 109922769 | 109923619 | 4.04  |
| chr7 | 109948014 | 109949199 | 4.04  |
| chr7 | 110120563 | 110121870 | 5.38  |
| chr7 | 110161016 | 110161931 | 3.7   |
| chr7 | 110162590 | 110163414 | 3.36  |
| chr7 | 110261508 | 110262398 | 1.68  |
| chr7 | 111138570 | 111139843 | 5.38  |
| chr7 | 111201688 | 111203203 | 5.38  |
| chr7 | 111211351 | 111212224 | 3.36  |
| chr7 | 111270637 | 111271612 | 4.71  |
| chr7 | 111316550 | 111317816 | 4.37  |
| chr7 | 111435286 | 111439370 | 16.48 |
| chr7 | 111582376 | 111584153 | 9.42  |
| chr7 | 111621632 | 111622594 | 3.36  |
| chr7 | 111864547 | 111865341 | 3.36  |
| chr7 | 112014180 | 112014989 | 2.69  |
| chr7 | 112062489 | 112063556 | 3.7   |
| chr7 | 112090305 | 112091117 | 4.04  |
| chr7 | 112121618 | 112122608 | 4.71  |
| chr7 | 112212433 | 112213540 | 3.7   |
| chr7 | 112264507 | 112265482 | 3.03  |
| chr7 | 112367894 | 112368895 | 3.36  |
| chr7 | 112430023 | 112431110 | 3.36  |
| chr7 | 112467765 | 112470697 | 5.38  |
| chr7 | 112569713 | 112570677 | 3.03  |
| chr7 | 112579365 | 112580114 | 2.69  |
| chr7 | 112598927 | 112599697 | 4.37  |
| chr7 | 112802351 | 112803621 | 4.71  |

|      |           |           |       |
|------|-----------|-----------|-------|
| chr7 | 112867253 | 112868178 | 3.36  |
| chr7 | 112908302 | 112909273 | 3.7   |
| chr7 | 112910440 | 112911901 | 4.71  |
| chr7 | 112912811 | 112913649 | 3.03  |
| chr7 | 112914473 | 112915923 | 3.36  |
| chr7 | 112931419 | 112932696 | 4.71  |
| chr7 | 113258722 | 113260146 | 4.37  |
| chr7 | 113260599 | 113261971 | 6.39  |
| chr7 | 113593430 | 113594349 | 4.04  |
| chr7 | 113725619 | 113726441 | 4.37  |
| chr7 | 113786699 | 113787682 | 1.68  |
| chr7 | 115161632 | 115162587 | 4.37  |
| chr7 | 116420659 | 116421670 | 4.71  |
| chr7 | 117798418 | 117799654 | 4.71  |
| chr7 | 118807069 | 118807985 | 1.68  |
| chr7 | 121150522 | 121151725 | 6.05  |
| chr7 | 122508688 | 122510194 | 6.39  |
| chr7 | 122831283 | 122832137 | 4.04  |
| chr7 | 122838871 | 122839864 | 2.69  |
| chr7 | 122882335 | 122883400 | 4.37  |
| chr7 | 122921778 | 122922694 | 4.71  |
| chr7 | 123057386 | 123058413 | 3.36  |
| chr7 | 123409203 | 123410024 | 3.7   |
| chr7 | 123437551 | 123438795 | 4.37  |
| chr7 | 123530764 | 123534163 | 7.4   |
| chr7 | 123540698 | 123541807 | 4.37  |
| chr7 | 123543177 | 123543947 | 3.7   |
| chr7 | 123544969 | 123546578 | 5.05  |
| chr7 | 123571981 | 123573018 | 3.7   |
| chr7 | 123575702 | 123577000 | 6.05  |
| chr7 | 124598851 | 124599889 | 4.37  |
| chr7 | 125098922 | 125099697 | 2.02  |
| chr7 | 127085645 | 127087666 | 8.07  |
| chr7 | 127185931 | 127187288 | 6.73  |
| chr7 | 127225776 | 127226622 | 4.04  |
| chr7 | 127247918 | 127249569 | 4.37  |
| chr7 | 127834187 | 127836601 | 7.4   |
| chr7 | 127877104 | 127878078 | 4.04  |
| chr7 | 127878453 | 127880020 | 5.72  |
| chr7 | 127907947 | 127908970 | 4.04  |
| chr7 | 127919218 | 127921296 | 7.4   |
| chr7 | 127983513 | 127984476 | 5.05  |
| chr7 | 128537961 | 128541068 | 16.15 |



|      |           |           |       |
|------|-----------|-----------|-------|
| chr7 | 129217559 | 129218686 | 4.71  |
| chr7 | 129224859 | 129227193 | 6.39  |
| chr7 | 129588417 | 129589650 | 4.71  |
| chr7 | 129896663 | 129899321 | 9.42  |
| chr7 | 129899711 | 129901073 | 4.04  |
| chr7 | 130316526 | 130317520 | 3.36  |
| chr7 | 130453102 | 130454346 | 4.71  |
| chr7 | 130511738 | 130512900 | 5.38  |
| chr7 | 130939485 | 130940830 | 10.43 |
| chr7 | 130990692 | 130992564 | 4.37  |
| chr7 | 130994755 | 130996420 | 5.05  |
| chr7 | 130997085 | 130998466 | 4.71  |
| chr7 | 131020509 | 131022573 | 8.75  |
| chr7 | 131310324 | 131311244 | 3.7   |
| chr7 | 131539048 | 131540189 | 3.7   |
| chr7 | 131871323 | 131872790 | 5.38  |
| chr7 | 133772542 | 133775242 | 11.44 |
| chr7 | 134250364 | 134251371 | 3.36  |
| chr7 | 134580995 | 134581846 | 4.04  |
| chr7 | 134840575 | 134841393 | 2.69  |
| chr7 | 134855137 | 134856158 | 3.7   |
| chr7 | 134865069 | 134867699 | 5.05  |
| chr7 | 135108054 | 135109169 | 1.35  |
| chr7 | 135451264 | 135452362 | 3.03  |
| chr7 | 135462302 | 135463582 | 4.04  |
| chr7 | 136429908 | 136430643 | 3.7   |
| chr7 | 137044474 | 137045616 | 5.05  |
| chr7 | 137516454 | 137518693 | 4.71  |
| chr7 | 137709539 | 137710376 | 4.04  |
| chr7 | 137720340 | 137721846 | 7.4   |
| chr7 | 137849546 | 137850295 | 4.04  |
| chr7 | 137872740 | 137873608 | 4.37  |
| chr7 | 137893781 | 137894663 | 3.36  |
| chr7 | 137902669 | 137906021 | 8.41  |
| chr7 | 137932110 | 137933345 | 5.72  |
| chr7 | 137973483 | 137975392 | 4.37  |
| chr7 | 138011605 | 138012869 | 3.7   |
| chr7 | 138017206 | 138018117 | 4.37  |
| chr7 | 138018791 | 138019788 | 4.04  |
| chr7 | 138027451 | 138028424 | 5.05  |
| chr7 | 138035255 | 138036100 | 3.36  |
| chr7 | 138053501 | 138055519 | 8.07  |
| chr7 | 138113894 | 138115424 | 6.05  |

|      |           |           |       |
|------|-----------|-----------|-------|
| chr7 | 138211707 | 138213591 | 17.83 |
| chr7 | 138240496 | 138243889 | 8.07  |
| chr7 | 138248649 | 138251137 | 7.74  |
| chr7 | 138337590 | 138339995 | 4.71  |
| chr7 | 138688063 | 138691149 | 6.73  |
| chr7 | 139024664 | 139025735 | 5.38  |
| chr7 | 139766240 | 139767500 | 4.71  |
| chr7 | 139875248 | 139876077 | 3.7   |
| chr7 | 140724038 | 140725596 | 5.72  |
| chr7 | 142599877 | 142601986 | 6.39  |
| chr7 | 142602241 | 142603746 | 4.37  |
| chr7 | 142820111 | 142821182 | 5.38  |
| chr7 | 142874531 | 142875457 | 4.37  |
| chr7 | 143845011 | 143846285 | 4.71  |
| chr7 | 144532790 | 144533651 | 3.7   |
| chr7 | 145616410 | 145617588 | 1.68  |
| chr7 | 146206773 | 146207936 | 5.05  |
| chr7 | 146210978 | 146212273 | 2.35  |
| chr7 | 146437123 | 146438138 | 3.7   |
| chr7 | 148336389 | 148337518 | 3.7   |
| chr7 | 148827275 | 148828688 | 3.7   |
| chr7 | 148892368 | 148893534 | 4.37  |
| chr7 | 149022190 | 149023239 | 4.04  |
| chr7 | 149044992 | 149046753 | 7.4   |
| chr7 | 149066508 | 149067380 | 4.37  |
| chr7 | 149069649 | 149070958 | 3.36  |
| chr7 | 149206670 | 149207965 | 4.71  |
| chr7 | 149224140 | 149230703 | 15.47 |
| chr7 | 149270217 | 149271445 | 6.05  |
| chr7 | 149387741 | 149388844 | 4.04  |
| chr7 | 149397295 | 149398996 | 4.04  |
| chr7 | 149404463 | 149405358 | 3.7   |
| chr7 | 149406920 | 149409627 | 13.45 |
| chr7 | 149439089 | 149439928 | 2.69  |
| chr7 | 150246021 | 150247894 | 8.07  |
| chr7 | 150399861 | 150401234 | 5.05  |
| chr7 | 150577874 | 150578999 | 4.04  |
| chr7 | 150686548 | 150688591 | 4.37  |
| chr7 | 151015701 | 151018948 | 5.05  |
| chr7 | 151158967 | 151160404 | 4.71  |
| chr7 | 151276256 | 151277267 | 7.06  |
| chr7 | 151515927 | 151517049 | 5.05  |
| chr7 | 151573216 | 151574607 | 4.04  |

|      |           |           |      |
|------|-----------|-----------|------|
| chr7 | 151610638 | 151611866 | 4.04 |
| chr7 | 151735125 | 151736091 | 3.36 |
| chr7 | 151785795 | 151787035 | 5.38 |
| chr7 | 152099254 | 152100461 | 4.04 |
| chr7 | 152107747 | 152108697 | 3.36 |
| chr7 | 152109564 | 152110491 | 4.04 |
| chr7 | 152396000 | 152397229 | 4.37 |
| chr7 | 152401256 | 152403067 | 7.4  |
| chr7 | 152403404 | 152404481 | 3.7  |
| chr7 | 152429782 | 152431110 | 8.75 |
| chr7 | 153090498 | 153091563 | 3.7  |
| chr7 | 153273161 | 153274051 | 4.71 |
| chr7 | 154517716 | 154518511 | 5.05 |
| chr7 | 154580173 | 154581150 | 3.7  |
| chr7 | 154603100 | 154604477 | 5.05 |
| chr7 | 154702278 | 154703392 | 5.05 |
| chr7 | 154725734 | 154726991 | 6.05 |
| chr7 | 154861267 | 154862502 | 5.72 |
| chr7 | 154910993 | 154912469 | 5.05 |
| chr7 | 154974626 | 154975432 | 3.36 |
| chr7 | 154976279 | 154978494 | 5.72 |
| chr7 | 155039916 | 155040784 | 3.7  |
| chr7 | 155107784 | 155109142 | 4.37 |
| chr7 | 155428418 | 155429370 | 3.36 |
| chr7 | 155440738 | 155442273 | 3.7  |
| chr7 | 155452975 | 155453780 | 2.35 |
| chr7 | 155579663 | 155580587 | 1.01 |
| chr7 | 155604354 | 155605071 | 4.37 |
| chr7 | 155977374 | 155978889 | 4.04 |
| chr7 | 156149191 | 156150082 | 3.36 |
| chr7 | 156303380 | 156304691 | 4.71 |
| chr7 | 156489499 | 156491934 | 6.73 |
| chr7 | 156525738 | 156526991 | 4.04 |
| chr7 | 156650740 | 156651548 | 4.04 |
| chr7 | 156653362 | 156654563 | 5.38 |
| chr7 | 156857714 | 156858542 | 4.04 |
| chr7 | 156917046 | 156917918 | 3.03 |
| chr7 | 157076826 | 157078170 | 5.38 |
| chr7 | 157264997 | 157266599 | 6.39 |
| chr7 | 157671807 | 157673067 | 4.04 |
| chr7 | 157765742 | 157768002 | 8.75 |
| chr7 | 157909881 | 157910939 | 4.71 |
| chr7 | 157939813 | 157940830 | 3.03 |

|      |           |           |      |
|------|-----------|-----------|------|
| chr7 | 158021570 | 158023121 | 4.71 |
| chr7 | 158146720 | 158147589 | 4.71 |
| chr7 | 158273511 | 158274526 | 4.04 |
| chr7 | 158297044 | 158300338 | 5.05 |
| chr7 | 158304208 | 158305688 | 4.04 |
| chr7 | 158307060 | 158308091 | 4.04 |
| chr7 | 158312067 | 158314596 | 4.71 |
| chr7 | 158370337 | 158371233 | 3.36 |
| chr7 | 158371732 | 158373962 | 6.05 |
| chr7 | 158382634 | 158383632 | 5.05 |
| chr7 | 158384012 | 158387555 | 5.05 |
| chr7 | 158498480 | 158501136 | 5.72 |
| chr7 | 158575376 | 158576284 | 3.7  |
| chr7 | 158610828 | 158612571 | 4.04 |
| chr7 | 158620104 | 158623179 | 4.37 |
| chr7 | 158637645 | 158640989 | 8.41 |
| chr7 | 158743766 | 158744629 | 4.37 |
| chr7 | 158758837 | 158760500 | 5.72 |
| chr7 | 158773594 | 158777451 | 7.06 |
| chr7 | 158807937 | 158808868 | 3.36 |
| chr7 | 159061422 | 159062571 | 4.71 |
| chr7 | 159120200 | 159121749 | 8.41 |
| chr6 | 291857    | 292836    | 3.7  |
| chr6 | 295912    | 296812    | 4.04 |
| chr6 | 299976    | 301464    | 3.36 |
| chr6 | 301695    | 303144    | 2.35 |
| chr6 | 303410    | 304334    | 4.04 |
| chr6 | 309895    | 311170    | 3.03 |
| chr6 | 316095    | 317645    | 3.7  |
| chr6 | 318155    | 318854    | 3.36 |
| chr6 | 319467    | 321836    | 3.7  |
| chr6 | 322365    | 323128    | 3.7  |
| chr6 | 331417    | 332929    | 2.35 |
| chr6 | 333543    | 334514    | 3.03 |
| chr6 | 335454    | 337085    | 3.03 |
| chr6 | 357102    | 358623    | 4.37 |
| chr6 | 361421    | 364458    | 5.05 |
| chr6 | 366419    | 367186    | 2.35 |
| chr6 | 369470    | 371013    | 3.7  |
| chr6 | 378562    | 380331    | 4.71 |
| chr6 | 381409    | 382330    | 3.36 |
| chr6 | 819214    | 820094    | 1.68 |
| chr6 | 1043693   | 1044541   | 2.35 |

|      |          |          |      |
|------|----------|----------|------|
| chr6 | 1610979  | 1611771  | 1.68 |
| chr6 | 2764475  | 2765747  | 3.7  |
| chr6 | 2803794  | 2804734  | 1.68 |
| chr6 | 2977927  | 2978749  | 2.69 |
| chr6 | 3664609  | 3665741  | 4.71 |
| chr6 | 3853515  | 3854293  | 1.68 |
| chr6 | 3912444  | 3913341  | 2.02 |
| chr6 | 3950681  | 3951495  | 1.35 |
| chr6 | 3977289  | 3978005  | 1.35 |
| chr6 | 4018391  | 4019617  | 4.04 |
| chr6 | 4243329  | 4244555  | 4.71 |
| chr6 | 4291349  | 4292378  | 1.68 |
| chr6 | 4311712  | 4313413  | 5.38 |
| chr6 | 4326027  | 4326958  | 1.35 |
| chr6 | 4367576  | 4368432  | 1.68 |
| chr6 | 4381537  | 4382564  | 3.7  |
| chr6 | 4383607  | 4385866  | 8.07 |
| chr6 | 4471459  | 4472303  | 3.36 |
| chr6 | 4488057  | 4490287  | 6.73 |
| chr6 | 4629070  | 4630917  | 6.39 |
| chr6 | 5050953  | 5052375  | 4.71 |
| chr6 | 5102749  | 5103611  | 1.68 |
| chr6 | 5862130  | 5862850  | 2.35 |
| chr6 | 7417902  | 7419609  | 5.05 |
| chr6 | 7852042  | 7852902  | 5.05 |
| chr6 | 7969020  | 7970438  | 4.37 |
| chr6 | 8902258  | 8903196  | 1.68 |
| chr6 | 9532279  | 9533243  | 4.04 |
| chr6 | 9552603  | 9554188  | 6.73 |
| chr6 | 9692401  | 9693341  | 2.69 |
| chr6 | 9776267  | 9777123  | 2.02 |
| chr6 | 9852476  | 9853869  | 3.7  |
| chr6 | 9862383  | 9863664  | 3.36 |
| chr6 | 10403983 | 10404945 | 2.69 |
| chr6 | 10418940 | 10420018 | 3.7  |
| chr6 | 11020453 | 11021373 | 1.68 |
| chr6 | 11028204 | 11029064 | 1.68 |
| chr6 | 11044175 | 11045568 | 3.7  |
| chr6 | 11093596 | 11094937 | 3.03 |
| chr6 | 11229489 | 11230417 | 3.03 |
| chr6 | 11396833 | 11397633 | 2.35 |
| chr6 | 11535573 | 11536744 | 4.04 |
| chr6 | 12014617 | 12015451 | 3.36 |

|      |          |          |       |
|------|----------|----------|-------|
| chr6 | 12331619 | 12332759 | 3.36  |
| chr6 | 12453635 | 12454879 | 6.05  |
| chr6 | 12492492 | 12493275 | 4.04  |
| chr6 | 13190719 | 13192004 | 3.03  |
| chr6 | 13574340 | 13575814 | 3.7   |
| chr6 | 13668404 | 13669190 | 2.35  |
| chr6 | 13711794 | 13712916 | 4.04  |
| chr6 | 14033265 | 14034168 | 1.35  |
| chr6 | 14169421 | 14171082 | 4.71  |
| chr6 | 14263865 | 14264899 | 1.68  |
| chr6 | 15419255 | 15420428 | 4.37  |
| chr6 | 15643377 | 15644498 | 4.04  |
| chr6 | 15661863 | 15662536 | 3.36  |
| chr6 | 16168354 | 16169326 | 2.35  |
| chr6 | 16239205 | 16240376 | 4.04  |
| chr6 | 16338631 | 16339589 | 1.01  |
| chr6 | 16572563 | 16573767 | 1.68  |
| chr6 | 16660301 | 16661215 | 1.35  |
| chr6 | 16690892 | 16691804 | 3.36  |
| chr6 | 16788867 | 16789743 | 2.02  |
| chr6 | 17152510 | 17153731 | 4.37  |
| chr6 | 17561574 | 17563863 | 10.43 |
| chr6 | 17565396 | 17566152 | 3.7   |
| chr6 | 17576867 | 17578175 | 4.71  |
| chr6 | 17599878 | 17601178 | 2.35  |
| chr6 | 17658328 | 17659105 | 2.02  |
| chr6 | 17706704 | 17707650 | 4.04  |
| chr6 | 17737450 | 17738821 | 5.38  |
| chr6 | 17917686 | 17919224 | 2.02  |
| chr6 | 18264293 | 18266707 | 4.04  |
| chr6 | 18823472 | 18824840 | 7.4   |
| chr6 | 19472047 | 19472906 | 4.04  |
| chr6 | 19509571 | 19510876 | 4.37  |
| chr6 | 19515620 | 19517659 | 7.4   |
| chr6 | 19838071 | 19838859 | 3.7   |
| chr6 | 20984273 | 20985544 | 5.38  |
| chr6 | 21412918 | 21413682 | 1.35  |
| chr6 | 21594693 | 21595587 | 2.35  |
| chr6 | 21596098 | 21597756 | 3.7   |
| chr6 | 21614103 | 21614929 | 3.36  |
| chr6 | 22173104 | 22174946 | 7.4   |
| chr6 | 22184156 | 22185402 | 4.37  |
| chr6 | 22418735 | 22420985 | 4.04  |

|      |          |          |       |
|------|----------|----------|-------|
| chr6 | 22838014 | 22839617 | 4.71  |
| chr6 | 22944469 | 22945362 | 3.7   |
| chr6 | 23108596 | 23109704 | 4.04  |
| chr6 | 23114720 | 23116011 | 4.04  |
| chr6 | 23164483 | 23165666 | 4.71  |
| chr6 | 23207229 | 23208142 | 3.7   |
| chr6 | 23209008 | 23210026 | 3.36  |
| chr6 | 23570676 | 23572137 | 4.37  |
| chr6 | 23672940 | 23676634 | 3.7   |
| chr6 | 24311234 | 24312576 | 4.71  |
| chr6 | 24669125 | 24671724 | 9.75  |
| chr6 | 24672717 | 24675006 | 5.72  |
| chr6 | 24724654 | 24725590 | 2.02  |
| chr6 | 24729625 | 24733013 | 7.4   |
| chr6 | 25132575 | 25135917 | 9.08  |
| chr6 | 25157497 | 25158947 | 8.75  |
| chr6 | 25737206 | 25738353 | 4.71  |
| chr6 | 26025635 | 26026443 | 3.7   |
| chr6 | 26056404 | 26057258 | 1.35  |
| chr6 | 26103926 | 26104751 | 3.7   |
| chr6 | 26287893 | 26289517 | 5.05  |
| chr6 | 26295450 | 26296694 | 5.38  |
| chr6 | 26536905 | 26538316 | 4.04  |
| chr6 | 26631434 | 26632562 | 4.37  |
| chr6 | 26633448 | 26634494 | 4.71  |
| chr6 | 26638889 | 26641166 | 4.37  |
| chr6 | 26648033 | 26648944 | 3.7   |
| chr6 | 27079024 | 27080599 | 8.75  |
| chr6 | 27124902 | 27125886 | 5.38  |
| chr6 | 27171490 | 27172319 | 1.68  |
| chr6 | 27325266 | 27329594 | 5.05  |
| chr6 | 27335464 | 27336736 | 4.71  |
| chr6 | 27355930 | 27357423 | 6.05  |
| chr6 | 27361422 | 27362654 | 5.05  |
| chr6 | 27366799 | 27371587 | 7.74  |
| chr6 | 27383762 | 27384995 | 4.71  |
| chr6 | 27415359 | 27417188 | 3.36  |
| chr6 | 27417766 | 27422206 | 13.12 |
| chr6 | 27424112 | 27425595 | 5.38  |
| chr6 | 27427456 | 27430258 | 3.7   |
| chr6 | 27651718 | 27652652 | 4.04  |
| chr6 | 28055934 | 28058373 | 9.42  |
| chr6 | 28059528 | 28060336 | 2.35  |

|      |          |          |      |
|------|----------|----------|------|
| chr6 | 28066030 | 28067567 | 3.7  |
| chr6 | 28120525 | 28122197 | 5.05 |
| chr6 | 28153838 | 28158782 | 8.07 |
| chr6 | 28293510 | 28295847 | 8.75 |
| chr6 | 28435369 | 28436072 | 2.02 |
| chr6 | 28442172 | 28442929 | 4.71 |
| chr6 | 33693169 | 33694143 | 2.35 |
| chr6 | 34112446 | 34113804 | 2.02 |
| chr6 | 34117093 | 34117907 | 1.35 |
| chr6 | 34127197 | 34128453 | 5.72 |
| chr6 | 34359134 | 34361166 | 4.04 |
| chr6 | 34363920 | 34364813 | 4.04 |
| chr6 | 34489878 | 34490800 | 1.35 |
| chr6 | 34503915 | 34505197 | 5.05 |
| chr6 | 34525697 | 34526824 | 4.71 |
| chr6 | 34542520 | 34543673 | 2.69 |
| chr6 | 34713263 | 34714431 | 4.04 |
| chr6 | 34759069 | 34760211 | 4.71 |
| chr6 | 35285670 | 35286606 | 3.7  |
| chr6 | 35655643 | 35656479 | 2.35 |
| chr6 | 35995132 | 35995943 | 5.05 |
| chr6 | 36107698 | 36108433 | 2.02 |
| chr6 | 36584258 | 36585534 | 4.71 |
| chr6 | 36705337 | 36706148 | 1.35 |
| chr6 | 36800598 | 36801517 | 1.35 |
| chr6 | 36986094 | 36987001 | 4.04 |
| chr6 | 37386594 | 37387375 | 3.03 |
| chr6 | 37400553 | 37401392 | 3.7  |
| chr6 | 37621113 | 37622454 | 4.37 |
| chr6 | 37663851 | 37664654 | 1.35 |
| chr6 | 37815462 | 37816319 | 2.35 |
| chr6 | 39144665 | 39145483 | 4.04 |
| chr6 | 39237508 | 39238306 | 4.04 |
| chr6 | 39960219 | 39961572 | 5.72 |
| chr6 | 39965463 | 39967531 | 6.39 |
| chr6 | 40150314 | 40152420 | 6.73 |
| chr6 | 41159247 | 41160346 | 2.69 |
| chr6 | 41181729 | 41183112 | 6.73 |
| chr6 | 41229360 | 41230664 | 4.37 |
| chr6 | 41394818 | 41395688 | 2.35 |
| chr6 | 41396088 | 41397186 | 1.68 |
| chr6 | 41513485 | 41514365 | 4.04 |
| chr6 | 41544892 | 41545743 | 2.35 |



|      |          |          |      |
|------|----------|----------|------|
| chr6 | 42152697 | 42153747 | 2.02 |
| chr6 | 42401444 | 42402733 | 6.39 |
| chr6 | 42419916 | 42421167 | 4.71 |
| chr6 | 42531357 | 42532416 | 4.71 |
| chr6 | 42857899 | 42858643 | 2.69 |
| chr6 | 43213849 | 43214641 | 3.7  |
| chr6 | 43243342 | 43244184 | 0.67 |
| chr6 | 43379838 | 43381622 | 6.05 |
| chr6 | 43463805 | 43464980 | 2.02 |
| chr6 | 43477200 | 43478297 | 1.68 |
| chr6 | 43484462 | 43485373 | 2.02 |
| chr6 | 43597325 | 43598246 | 4.71 |
| chr6 | 43634904 | 43636371 | 2.69 |
| chr6 | 43776925 | 43777984 | 1.35 |
| chr6 | 43854486 | 43855274 | 2.02 |
| chr6 | 44095244 | 44096047 | 3.7  |
| chr6 | 44213536 | 44215813 | 4.71 |
| chr6 | 44224916 | 44225825 | 3.03 |
| chr6 | 44410237 | 44411612 | 3.7  |
| chr6 | 44667180 | 44668030 | 1.35 |
| chr6 | 44727814 | 44730661 | 9.42 |
| chr6 | 44939879 | 44941492 | 4.04 |
| chr6 | 45520843 | 45521545 | 3.36 |
| chr6 | 45567215 | 45568600 | 1.68 |
| chr6 | 45583362 | 45584270 | 2.35 |
| chr6 | 45649479 | 45650291 | 3.36 |
| chr6 | 45668798 | 45669698 | 1.35 |
| chr6 | 45982713 | 45983839 | 2.69 |
| chr6 | 46074656 | 46075492 | 3.7  |
| chr6 | 46461873 | 46462675 | 1.35 |
| chr6 | 46728561 | 46729327 | 1.35 |
| chr6 | 47171404 | 47172652 | 2.02 |
| chr6 | 47246328 | 47246991 | 3.03 |
| chr6 | 47479921 | 47481483 | 5.38 |
| chr6 | 48203249 | 48204550 | 4.71 |
| chr6 | 48357407 | 48358306 | 2.02 |
| chr6 | 48656866 | 48658030 | 4.04 |
| chr6 | 48698518 | 48699664 | 4.04 |
| chr6 | 48714806 | 48715731 | 3.7  |
| chr6 | 48808116 | 48809556 | 4.71 |
| chr6 | 49097207 | 49098000 | 2.69 |
| chr6 | 49331977 | 49332785 | 2.02 |
| chr6 | 49333889 | 49335129 | 5.38 |

|      |          |          |      |
|------|----------|----------|------|
| chr6 | 49635313 | 49636462 | 4.04 |
| chr6 | 49644008 | 49645059 | 3.7  |
| chr6 | 49661005 | 49662009 | 3.03 |
| chr6 | 49685698 | 49686728 | 3.36 |
| chr6 | 49687120 | 49688471 | 4.37 |
| chr6 | 49688683 | 49689663 | 3.03 |
| chr6 | 52572167 | 52573519 | 7.74 |
| chr6 | 52740697 | 52741999 | 4.71 |
| chr6 | 53213181 | 53214112 | 2.02 |
| chr6 | 53323298 | 53324126 | 3.03 |
| chr6 | 53422604 | 53424950 | 8.41 |
| chr6 | 53608862 | 53609933 | 4.71 |
| chr6 | 54531596 | 54533427 | 7.4  |
| chr6 | 54599899 | 54601306 | 5.05 |
| chr6 | 54608900 | 54610488 | 6.39 |
| chr6 | 54717721 | 54719045 | 5.38 |
| chr6 | 54739104 | 54740037 | 2.69 |
| chr6 | 54783320 | 54784063 | 1.01 |
| chr6 | 55076797 | 55077649 | 2.69 |
| chr6 | 55494235 | 55495241 | 4.04 |
| chr6 | 55615112 | 55616338 | 4.04 |
| chr6 | 55621469 | 55622319 | 3.36 |
| chr6 | 56036379 | 56037925 | 6.39 |
| chr6 | 56304106 | 56305553 | 5.05 |
| chr6 | 56407330 | 56408116 | 3.7  |
| chr6 | 56841461 | 56843055 | 5.72 |
| chr6 | 57222475 | 57223504 | 2.02 |
| chr6 | 57264628 | 57265782 | 5.05 |
| chr6 | 57275085 | 57275899 | 2.02 |
| chr6 | 57311947 | 57312805 | 3.7  |
| chr6 | 57369199 | 57370786 | 3.03 |
| chr6 | 57379486 | 57380712 | 3.7  |
| chr6 | 57382214 | 57383242 | 3.36 |
| chr6 | 57387424 | 57389408 | 4.71 |
| chr6 | 57390797 | 57391866 | 2.02 |
| chr6 | 57401700 | 57402505 | 3.36 |
| chr6 | 57405747 | 57407513 | 3.03 |
| chr6 | 57409077 | 57410192 | 4.04 |
| chr6 | 57411725 | 57412906 | 3.36 |
| chr6 | 57413806 | 57415356 | 2.69 |
| chr6 | 57420331 | 57421437 | 4.37 |
| chr6 | 57431432 | 57432294 | 2.69 |
| chr6 | 57436538 | 57437520 | 2.35 |

|      |          |          |       |
|------|----------|----------|-------|
| chr6 | 57440993 | 57443223 | 4.71  |
| chr6 | 57444963 | 57447645 | 3.7   |
| chr6 | 57450214 | 57452145 | 3.36  |
| chr6 | 57452700 | 57453837 | 4.04  |
| chr6 | 57460068 | 57461116 | 3.7   |
| chr6 | 57462013 | 57463781 | 4.04  |
| chr6 | 57467179 | 57468007 | 3.36  |
| chr6 | 57468451 | 57469389 | 3.7   |
| chr6 | 57471521 | 57472413 | 3.36  |
| chr6 | 57474967 | 57476215 | 3.03  |
| chr6 | 57476988 | 57477963 | 3.03  |
| chr6 | 57481958 | 57482816 | 2.69  |
| chr6 | 57483935 | 57485398 | 3.03  |
| chr6 | 57488413 | 57489354 | 3.36  |
| chr6 | 57491097 | 57492632 | 3.36  |
| chr6 | 57497752 | 57499565 | 4.37  |
| chr6 | 57501264 | 57502635 | 4.71  |
| chr6 | 57518831 | 57519777 | 3.7   |
| chr6 | 57523871 | 57525128 | 3.36  |
| chr6 | 57526463 | 57528198 | 3.7   |
| chr6 | 57541050 | 57541961 | 3.03  |
| chr6 | 57544527 | 57546427 | 4.37  |
| chr6 | 57556100 | 57557194 | 3.03  |
| chr6 | 57560728 | 57562828 | 3.36  |
| chr6 | 58730139 | 58734495 | 5.72  |
| chr6 | 58745298 | 58746104 | 3.36  |
| chr6 | 58747241 | 58748305 | 3.36  |
| chr6 | 58748697 | 58752771 | 5.38  |
| chr6 | 58753167 | 58759791 | 6.39  |
| chr6 | 58760132 | 58771198 | 6.39  |
| chr6 | 58772897 | 58780205 | 94.18 |
| chr6 | 61880111 | 61883957 | 4.37  |
| chr6 | 61910180 | 61912213 | 7.06  |
| chr6 | 61912720 | 61914184 | 11.44 |
| chr6 | 61919039 | 61921488 | 4.04  |
| chr6 | 61926440 | 61929957 | 5.38  |
| chr6 | 61932628 | 61934183 | 5.38  |
| chr6 | 61934932 | 61936419 | 3.7   |
| chr6 | 61938787 | 61940289 | 4.04  |
| chr6 | 61955100 | 61956574 | 4.37  |
| chr6 | 62026252 | 62027534 | 4.04  |
| chr6 | 62178426 | 62182062 | 5.05  |
| chr6 | 62182987 | 62186195 | 4.04  |

|      |          |          |       |
|------|----------|----------|-------|
| chr6 | 62186750 | 62188332 | 4.37  |
| chr6 | 62188779 | 62193504 | 5.05  |
| chr6 | 62193907 | 62195194 | 4.04  |
| chr6 | 62195863 | 62200451 | 4.04  |
| chr6 | 62208969 | 62216481 | 4.37  |
| chr6 | 62217422 | 62219728 | 4.37  |
| chr6 | 62220085 | 62228568 | 6.05  |
| chr6 | 63362062 | 63363472 | 4.71  |
| chr6 | 64321040 | 64322213 | 1.35  |
| chr6 | 65081544 | 65082437 | 3.36  |
| chr6 | 66847251 | 66848557 | 7.4   |
| chr6 | 66870919 | 66872309 | 3.7   |
| chr6 | 66920179 | 66921941 | 9.42  |
| chr6 | 66922299 | 66923367 | 3.7   |
| chr6 | 67590474 | 67592433 | 4.71  |
| chr6 | 67606285 | 67608485 | 8.07  |
| chr6 | 67634743 | 67636280 | 6.05  |
| chr6 | 67870310 | 67871214 | 4.37  |
| chr6 | 68167341 | 68170043 | 9.42  |
| chr6 | 68216127 | 68217160 | 3.7   |
| chr6 | 68253709 | 68257017 | 13.45 |
| chr6 | 68258018 | 68259625 | 3.36  |
| chr6 | 68380350 | 68382287 | 5.38  |
| chr6 | 68382860 | 68384945 | 4.37  |
| chr6 | 68522008 | 68523352 | 4.71  |
| chr6 | 68572380 | 68573621 | 4.04  |
| chr6 | 68665737 | 68667037 | 5.38  |
| chr6 | 68831329 | 68832983 | 9.42  |
| chr6 | 71523811 | 71524840 | 1.68  |
| chr6 | 74104277 | 74105176 | 3.03  |
| chr6 | 74233286 | 74234088 | 2.35  |
| chr6 | 75214644 | 75216028 | 2.35  |
| chr6 | 75332415 | 75333609 | 4.71  |
| chr6 | 76077450 | 76078304 | 2.02  |
| chr6 | 76275481 | 76276978 | 4.37  |
| chr6 | 76311841 | 76312934 | 3.7   |
| chr6 | 76387282 | 76388188 | 1.68  |
| chr6 | 76409374 | 76410386 | 1.68  |
| chr6 | 76456594 | 76458198 | 4.71  |
| chr6 | 76458497 | 76459587 | 3.36  |
| chr6 | 76735453 | 76736723 | 6.39  |
| chr6 | 77205153 | 77206110 | 5.38  |
| chr6 | 78221070 | 78222025 | 2.35  |

|      |          |          |       |
|------|----------|----------|-------|
| chr6 | 79385384 | 79386358 | 2.35  |
| chr6 | 79787566 | 79788649 | 3.36  |
| chr6 | 79845246 | 79846557 | 5.72  |
| chr6 | 81002523 | 81003635 | 4.37  |
| chr6 | 81005167 | 81006490 | 4.04  |
| chr6 | 81295805 | 81296863 | 5.72  |
| chr6 | 81411520 | 81412766 | 4.37  |
| chr6 | 81429516 | 81430441 | 3.03  |
| chr6 | 81731959 | 81733711 | 7.4   |
| chr6 | 82148965 | 82150259 | 4.04  |
| chr6 | 83167092 | 83169268 | 4.04  |
| chr6 | 83176307 | 83178017 | 8.75  |
| chr6 | 83193790 | 83200822 | 9.08  |
| chr6 | 83279373 | 83280535 | 4.04  |
| chr6 | 83397402 | 83398441 | 4.37  |
| chr6 | 83414857 | 83416117 | 5.38  |
| chr6 | 83526742 | 83527457 | 0.67  |
| chr6 | 83639722 | 83642702 | 10.09 |
| chr6 | 83652026 | 83652805 | 5.05  |
| chr6 | 83741040 | 83742174 | 4.71  |
| chr6 | 84466382 | 84467571 | 3.03  |
| chr6 | 84576789 | 84578423 | 5.05  |
| chr6 | 85457532 | 85458360 | 1.35  |
| chr6 | 85742713 | 85744088 | 6.05  |
| chr6 | 85767596 | 85768689 | 2.35  |
| chr6 | 86434888 | 86436859 | 8.07  |
| chr6 | 86474517 | 86475582 | 1.35  |
| chr6 | 86517216 | 86518121 | 4.71  |
| chr6 | 86538563 | 86539248 | 5.05  |
| chr6 | 87077595 | 87079138 | 5.72  |
| chr6 | 87468873 | 87470278 | 3.7   |
| chr6 | 87864528 | 87865503 | 3.36  |
| chr6 | 87935076 | 87935886 | 1.35  |
| chr6 | 88032175 | 88032990 | 3.03  |
| chr6 | 88131152 | 88132012 | 4.37  |
| chr6 | 88441170 | 88442430 | 4.04  |
| chr6 | 88740583 | 88742256 | 12.11 |
| chr6 | 88938743 | 88939821 | 2.35  |
| chr6 | 89379203 | 89380811 | 5.72  |
| chr6 | 89516915 | 89517887 | 4.04  |
| chr6 | 89594168 | 89595226 | 1.68  |
| chr6 | 89662965 | 89664425 | 4.37  |
| chr6 | 89676685 | 89678350 | 6.39  |

|      |           |           |       |
|------|-----------|-----------|-------|
| chr6 | 89992818  | 89993792  | 1.01  |
| chr6 | 90077248  | 90078243  | 1.68  |
| chr6 | 90779487  | 90780232  | 1.35  |
| chr6 | 90907013  | 90907836  | 3.7   |
| chr6 | 90965484  | 90966383  | 1.68  |
| chr6 | 91541931  | 91543292  | 4.04  |
| chr6 | 92595443  | 92596713  | 6.05  |
| chr6 | 93447215  | 93448209  | 3.03  |
| chr6 | 93643937  | 93645228  | 5.72  |
| chr6 | 94128616  | 94129459  | 3.7   |
| chr6 | 94481027  | 94481833  | 1.35  |
| chr6 | 94656019  | 94656825  | 2.35  |
| chr6 | 94746110  | 94747001  | 2.02  |
| chr6 | 95868114  | 95869495  | 6.73  |
| chr6 | 96031763  | 96033114  | 6.05  |
| chr6 | 96415246  | 96416294  | 4.04  |
| chr6 | 96437317  | 96438401  | 5.05  |
| chr6 | 96462733  | 96463851  | 3.36  |
| chr6 | 97949057  | 97949770  | 1.35  |
| chr6 | 98590349  | 98591636  | 2.69  |
| chr6 | 100015840 | 100016999 | 4.37  |
| chr6 | 101473392 | 101474694 | 5.05  |
| chr6 | 101696942 | 101698201 | 3.03  |
| chr6 | 101750266 | 101751576 | 6.39  |
| chr6 | 102642693 | 102644303 | 4.37  |
| chr6 | 102644733 | 102645918 | 6.05  |
| chr6 | 103062573 | 103063552 | 3.36  |
| chr6 | 103727759 | 103729194 | 9.42  |
| chr6 | 104661268 | 104662103 | 2.02  |
| chr6 | 104791338 | 104793026 | 3.36  |
| chr6 | 105706393 | 105707402 | 2.02  |
| chr6 | 105925650 | 105926501 | 2.35  |
| chr6 | 106160936 | 106162096 | 6.05  |
| chr6 | 106222850 | 106223759 | 4.71  |
| chr6 | 106516610 | 106517507 | 2.69  |
| chr6 | 107150057 | 107151248 | 2.35  |
| chr6 | 107220999 | 107222127 | 5.38  |
| chr6 | 107255079 | 107259464 | 10.09 |
| chr6 | 107306255 | 107307626 | 4.04  |
| chr6 | 107307866 | 107309557 | 4.37  |
| chr6 | 107747031 | 107748223 | 4.71  |
| chr6 | 107768341 | 107769683 | 6.73  |
| chr6 | 107930566 | 107931481 | 2.69  |

|      |           |           |       |
|------|-----------|-----------|-------|
| chr6 | 108003895 | 108004685 | 2.02  |
| chr6 | 108060627 | 108061748 | 1.35  |
| chr6 | 108096093 | 108096929 | 1.35  |
| chr6 | 108238574 | 108239832 | 3.7   |
| chr6 | 108329169 | 108330305 | 5.38  |
| chr6 | 108455571 | 108456327 | 1.35  |
| chr6 | 108878889 | 108879599 | 2.02  |
| chr6 | 109023168 | 109024435 | 5.72  |
| chr6 | 109028352 | 109029408 | 3.7   |
| chr6 | 109038022 | 109038859 | 3.7   |
| chr6 | 109044728 | 109045396 | 3.7   |
| chr6 | 109060203 | 109061509 | 4.04  |
| chr6 | 109106580 | 109107746 | 2.02  |
| chr6 | 109510581 | 109511628 | 2.02  |
| chr6 | 109512296 | 109513290 | 4.37  |
| chr6 | 109761088 | 109762769 | 4.04  |
| chr6 | 109836477 | 109837567 | 1.68  |
| chr6 | 110459039 | 110460198 | 4.04  |
| chr6 | 110783701 | 110784810 | 4.37  |
| chr6 | 110855725 | 110857185 | 4.71  |
| chr6 | 110872610 | 110873884 | 4.71  |
| chr6 | 110981400 | 110982361 | 3.36  |
| chr6 | 111135167 | 111136532 | 3.36  |
| chr6 | 111243397 | 111244955 | 4.37  |
| chr6 | 111270420 | 111271592 | 2.02  |
| chr6 | 111408333 | 111410040 | 1.68  |
| chr6 | 111483116 | 111485701 | 14.46 |
| chr6 | 111595269 | 111596569 | 4.71  |
| chr6 | 111621946 | 111622894 | 4.37  |
| chr6 | 112306843 | 112307759 | 1.68  |
| chr6 | 112649641 | 112650464 | 5.05  |
| chr6 | 113588712 | 113589684 | 5.05  |
| chr6 | 113753922 | 113755275 | 4.04  |
| chr6 | 114042262 | 114043145 | 1.01  |
| chr6 | 114455401 | 114456410 | 1.35  |
| chr6 | 116225668 | 116226429 | 2.35  |
| chr6 | 116421198 | 116422772 | 3.7   |
| chr6 | 116593556 | 116594448 | 1.68  |
| chr6 | 116792478 | 116793398 | 2.69  |
| chr6 | 117223068 | 117223901 | 1.01  |
| chr6 | 117803526 | 117804806 | 2.69  |
| chr6 | 117945447 | 117949589 | 8.41  |
| chr6 | 118894886 | 118896277 | 7.06  |

|      |           |           |      |
|------|-----------|-----------|------|
| chr6 | 119106501 | 119107285 | 1.35 |
| chr6 | 119186710 | 119187666 | 2.02 |
| chr6 | 119403605 | 119406082 | 8.75 |
| chr6 | 119591202 | 119592647 | 4.71 |
| chr6 | 120004076 | 120004879 | 3.7  |
| chr6 | 120242240 | 120243590 | 4.37 |
| chr6 | 120243803 | 120246370 | 3.7  |
| chr6 | 120679262 | 120681285 | 7.4  |
| chr6 | 120799613 | 120800471 | 4.37 |
| chr6 | 121053258 | 121054312 | 3.03 |
| chr6 | 121445532 | 121446516 | 3.36 |
| chr6 | 121535388 | 121537107 | 5.05 |
| chr6 | 121952511 | 121955401 | 6.05 |
| chr6 | 122627472 | 122629320 | 5.38 |
| chr6 | 122815476 | 122817000 | 4.71 |
| chr6 | 122825201 | 122827695 | 9.42 |
| chr6 | 122943463 | 122944675 | 4.71 |
| chr6 | 123004722 | 123005421 | 1.35 |
| chr6 | 123459020 | 123459862 | 4.37 |
| chr6 | 124699025 | 124699789 | 1.35 |
| chr6 | 125299317 | 125300705 | 5.38 |
| chr6 | 125430634 | 125433528 | 6.05 |
| chr6 | 125563255 | 125564730 | 4.71 |
| chr6 | 125773640 | 125775707 | 5.38 |
| chr6 | 125905366 | 125906093 | 3.36 |
| chr6 | 126003341 | 126004836 | 3.7  |
| chr6 | 126031683 | 126033163 | 4.04 |
| chr6 | 126038314 | 126039510 | 4.37 |
| chr6 | 126277741 | 126278431 | 4.37 |
| chr6 | 127836628 | 127837995 | 3.36 |
| chr6 | 128253346 | 128254913 | 9.08 |
| chr6 | 128696784 | 128698379 | 4.37 |
| chr6 | 128891331 | 128892261 | 5.05 |
| chr6 | 129089059 | 129090192 | 4.37 |
| chr6 | 129764904 | 129766036 | 1.35 |
| chr6 | 130087471 | 130088280 | 1.35 |
| chr6 | 131070612 | 131071644 | 4.37 |
| chr6 | 131374682 | 131377118 | 9.42 |
| chr6 | 132128095 | 132129763 | 3.7  |
| chr6 | 132164859 | 132165933 | 5.38 |
| chr6 | 132495571 | 132496979 | 6.05 |
| chr6 | 132665461 | 132666427 | 5.05 |
| chr6 | 132786365 | 132787277 | 1.68 |



|      |           |           |      |
|------|-----------|-----------|------|
| chr6 | 133197663 | 133198843 | 7.74 |
| chr6 | 133408904 | 133409730 | 2.02 |
| chr6 | 134216584 | 134217428 | 2.02 |
| chr6 | 134368849 | 134369686 | 1.01 |
| chr6 | 135111235 | 135112865 | 3.7  |
| chr6 | 135300903 | 135301636 | 1.68 |
| chr6 | 135626358 | 135627110 | 1.01 |
| chr6 | 135799415 | 135800731 | 5.72 |
| chr6 | 135801897 | 135804288 | 7.4  |
| chr6 | 136384801 | 136385946 | 1.35 |
| chr6 | 136400151 | 136401026 | 1.68 |
| chr6 | 136610355 | 136611808 | 3.7  |
| chr6 | 136787950 | 136788732 | 1.35 |
| chr6 | 136891541 | 136893105 | 4.71 |
| chr6 | 137152617 | 137153878 | 7.4  |
| chr6 | 137194293 | 137195681 | 3.7  |
| chr6 | 137484016 | 137486453 | 8.07 |
| chr6 | 137502254 | 137505371 | 9.42 |
| chr6 | 137505705 | 137510875 | 6.05 |
| chr6 | 137573353 | 137574224 | 3.36 |
| chr6 | 137575123 | 137577175 | 5.05 |
| chr6 | 137831594 | 137832644 | 2.02 |
| chr6 | 137974524 | 137976215 | 6.39 |
| chr6 | 138156131 | 138156989 | 1.68 |
| chr6 | 138237145 | 138238212 | 2.35 |
| chr6 | 138315787 | 138316612 | 1.01 |
| chr6 | 138428259 | 138429067 | 2.35 |
| chr6 | 138438443 | 138439588 | 2.02 |
| chr6 | 138482780 | 138484302 | 3.7  |
| chr6 | 138498375 | 138499458 | 2.69 |
| chr6 | 138799289 | 138799990 | 1.68 |
| chr6 | 138903344 | 138904268 | 3.7  |
| chr6 | 139151093 | 139151935 | 1.68 |
| chr6 | 139612378 | 139613148 | 2.02 |
| chr6 | 139697297 | 139698606 | 4.04 |
| chr6 | 140341158 | 140342138 | 4.04 |
| chr6 | 140511063 | 140511983 | 3.36 |
| chr6 | 140512360 | 140515433 | 11.1 |
| chr6 | 140685801 | 140687416 | 4.04 |
| chr6 | 140783559 | 140784774 | 4.37 |
| chr6 | 140808752 | 140809666 | 3.36 |
| chr6 | 140947469 | 140948909 | 7.74 |
| chr6 | 141222293 | 141223349 | 5.38 |

|      |           |           |      |
|------|-----------|-----------|------|
| chr6 | 141728390 | 141729945 | 6.39 |
| chr6 | 142623046 | 142624010 | 4.04 |
| chr6 | 142705767 | 142706969 | 2.02 |
| chr6 | 142855055 | 142857627 | 5.38 |
| chr6 | 142904628 | 142905731 | 5.38 |
| chr6 | 142968444 | 142969277 | 3.03 |
| chr6 | 143519097 | 143519948 | 0.67 |
| chr6 | 143554637 | 143555604 | 1.68 |
| chr6 | 143846099 | 143846940 | 1.68 |
| chr6 | 143996553 | 143997424 | 3.36 |
| chr6 | 144239304 | 144240437 | 2.35 |
| chr6 | 144267974 | 144268959 | 4.04 |
| chr6 | 144342661 | 144343569 | 2.02 |
| chr6 | 144385109 | 144385919 | 2.02 |
| chr6 | 144523491 | 144524948 | 6.05 |
| chr6 | 145157762 | 145158736 | 1.01 |
| chr6 | 145418747 | 145420164 | 4.04 |
| chr6 | 145479496 | 145480524 | 3.7  |
| chr6 | 146111512 | 146112888 | 6.39 |
| chr6 | 147226057 | 147227307 | 4.71 |
| chr6 | 147285316 | 147287288 | 8.41 |
| chr6 | 147409504 | 147410813 | 4.37 |
| chr6 | 147721625 | 147723652 | 6.05 |
| chr6 | 148535728 | 148536565 | 2.02 |
| chr6 | 148908209 | 148909103 | 3.7  |
| chr6 | 148973340 | 148975183 | 7.4  |
| chr6 | 148992601 | 148993484 | 2.35 |
| chr6 | 149293339 | 149294351 | 2.35 |
| chr6 | 149322146 | 149323309 | 6.73 |
| chr6 | 149381979 | 149383019 | 4.04 |
| chr6 | 149442228 | 149443121 | 4.04 |
| chr6 | 149506793 | 149507668 | 3.7  |
| chr6 | 149509192 | 149510502 | 4.71 |
| chr6 | 149559731 | 149560646 | 3.36 |
| chr6 | 149822547 | 149823540 | 1.68 |
| chr6 | 149866618 | 149867675 | 3.03 |
| chr6 | 150228973 | 150230388 | 4.04 |
| chr6 | 150468095 | 150469003 | 4.37 |
| chr6 | 150618161 | 150619022 | 4.04 |
| chr6 | 150662908 | 150664005 | 5.05 |
| chr6 | 150903990 | 150904787 | 1.01 |
| chr6 | 151711481 | 151712184 | 2.69 |
| chr6 | 151720443 | 151721645 | 3.7  |

|      |           |           |       |
|------|-----------|-----------|-------|
| chr6 | 151835665 | 151836741 | 4.04  |
| chr6 | 151837148 | 151846231 | 7.74  |
| chr6 | 151878910 | 151885275 | 9.08  |
| chr6 | 151889173 | 151890074 | 3.36  |
| chr6 | 151900442 | 151902237 | 4.04  |
| chr6 | 151902894 | 151904114 | 4.04  |
| chr6 | 151905750 | 151907328 | 3.7   |
| chr6 | 151908199 | 151909269 | 4.04  |
| chr6 | 151911438 | 151912295 | 3.36  |
| chr6 | 151913507 | 151915943 | 10.76 |
| chr6 | 151919501 | 151920382 | 3.03  |
| chr6 | 151920699 | 151939884 | 8.07  |
| chr6 | 151947767 | 151952515 | 3.7   |
| chr6 | 151953181 | 151955565 | 5.38  |
| chr6 | 151957469 | 151965064 | 6.05  |
| chr6 | 151968205 | 151970526 | 5.38  |
| chr6 | 151972515 | 151977069 | 5.38  |
| chr6 | 151978585 | 151980168 | 5.05  |
| chr6 | 151984628 | 151989232 | 4.71  |
| chr6 | 151989651 | 151990568 | 3.7   |
| chr6 | 151991963 | 151993044 | 3.7   |
| chr6 | 151996397 | 151997673 | 5.05  |
| chr6 | 152002413 | 152003410 | 3.7   |
| chr6 | 152010579 | 152012132 | 3.7   |
| chr6 | 152023884 | 152025147 | 4.04  |
| chr6 | 152457264 | 152458214 | 3.36  |
| chr6 | 152513568 | 152514762 | 6.05  |
| chr6 | 152542674 | 152543939 | 4.71  |
| chr6 | 153733238 | 153734712 | 7.06  |
| chr6 | 153764809 | 153766128 | 6.73  |
| chr6 | 154057911 | 154058731 | 3.36  |
| chr6 | 154075189 | 154075894 | 3.36  |
| chr6 | 154206695 | 154208620 | 4.37  |
| chr6 | 154475262 | 154476454 | 2.69  |
| chr6 | 154488236 | 154489234 | 3.7   |
| chr6 | 155675004 | 155676089 | 1.68  |
| chr6 | 155932639 | 155933692 | 4.04  |
| chr6 | 158401232 | 158402098 | 1.01  |
| chr6 | 158717463 | 158718738 | 5.38  |
| chr6 | 159836061 | 159837260 | 1.35  |
| chr6 | 159854561 | 159855411 | 2.35  |
| chr6 | 161219085 | 161220348 | 5.38  |
| chr6 | 161747961 | 161748907 | 5.72  |

|      |           |           |      |
|------|-----------|-----------|------|
| chr6 | 168439748 | 168441501 | 7.74 |
| chr6 | 169490213 | 169491503 | 5.38 |
| chr6 | 170085459 | 170086461 | 5.05 |
| chr6 | 170231715 | 170232502 | 1.68 |
| chr6 | 170346032 | 170346850 | 4.37 |
| chr6 | 170587471 | 170588434 | 2.35 |
| chr6 | 170753900 | 170754818 | 1.35 |
| chr5 | 90406     | 91701     | 2.69 |
| chr5 | 147178    | 148421    | 4.37 |
| chr5 | 596770    | 597743    | 1.35 |
| chr5 | 612655    | 614054    | 7.06 |
| chr5 | 701598    | 702613    | 3.36 |
| chr5 | 958550    | 959250    | 1.01 |
| chr5 | 966939    | 968071    | 1.68 |
| chr5 | 1097328   | 1098010   | 1.68 |
| chr5 | 1145795   | 1146662   | 1.35 |
| chr5 | 1314226   | 1315197   | 1.68 |
| chr5 | 1453328   | 1455335   | 4.04 |
| chr5 | 1455657   | 1458912   | 5.05 |
| chr5 | 1516072   | 1517122   | 3.7  |
| chr5 | 1554969   | 1555960   | 4.71 |
| chr5 | 1642578   | 1643252   | 2.02 |
| chr5 | 1718347   | 1719583   | 5.05 |
| chr5 | 1743250   | 1744058   | 2.02 |
| chr5 | 1974772   | 1975739   | 1.35 |
| chr5 | 2482440   | 2483481   | 4.37 |
| chr5 | 2756394   | 2757385   | 2.35 |
| chr5 | 2879406   | 2880581   | 5.05 |
| chr5 | 2887587   | 2888663   | 2.02 |
| chr5 | 2995519   | 2996408   | 2.02 |
| chr5 | 3224294   | 3225266   | 1.68 |
| chr5 | 3371959   | 3373167   | 1.68 |
| chr5 | 5084748   | 5085622   | 1.68 |
| chr5 | 5159520   | 5160650   | 1.35 |
| chr5 | 5569651   | 5570493   | 2.02 |
| chr5 | 5622973   | 5624293   | 4.37 |
| chr5 | 5743409   | 5744551   | 3.03 |
| chr5 | 6123753   | 6124557   | 1.68 |
| chr5 | 6267345   | 6268278   | 1.01 |
| chr5 | 6495090   | 6496665   | 4.04 |
| chr5 | 6542574   | 6543469   | 2.02 |
| chr5 | 6755562   | 6756368   | 1.01 |
| chr5 | 6820551   | 6821876   | 5.38 |

|      |          |          |      |
|------|----------|----------|------|
| chr5 | 6856565  | 6857311  | 1.01 |
| chr5 | 6888838  | 6889996  | 3.36 |
| chr5 | 7021334  | 7023502  | 8.41 |
| chr5 | 7396381  | 7397340  | 2.02 |
| chr5 | 7567397  | 7568292  | 1.01 |
| chr5 | 8489271  | 8490505  | 3.36 |
| chr5 | 8661676  | 8662613  | 1.68 |
| chr5 | 9023513  | 9024322  | 2.69 |
| chr5 | 9042138  | 9042971  | 2.02 |
| chr5 | 9107611  | 9108530  | 1.68 |
| chr5 | 9524081  | 9525091  | 1.68 |
| chr5 | 9544337  | 9545410  | 2.02 |
| chr5 | 9610021  | 9610834  | 1.68 |
| chr5 | 9621623  | 9622659  | 2.35 |
| chr5 | 9747294  | 9748124  | 3.03 |
| chr5 | 9813696  | 9814580  | 2.02 |
| chr5 | 9821054  | 9822461  | 2.35 |
| chr5 | 9852939  | 9854312  | 2.69 |
| chr5 | 9864649  | 9866651  | 8.07 |
| chr5 | 10051266 | 10052149 | 3.36 |
| chr5 | 10193652 | 10194637 | 3.7  |
| chr5 | 10249639 | 10250965 | 4.04 |
| chr5 | 10310192 | 10311298 | 4.04 |
| chr5 | 10353085 | 10355542 | 4.37 |
| chr5 | 10365958 | 10366801 | 3.36 |
| chr5 | 10441638 | 10442495 | 4.04 |
| chr5 | 10456760 | 10458667 | 4.71 |
| chr5 | 10466896 | 10468012 | 4.04 |
| chr5 | 10493350 | 10495554 | 4.71 |
| chr5 | 10553902 | 10556001 | 4.71 |
| chr5 | 10559512 | 10560343 | 4.04 |
| chr5 | 10563632 | 10564795 | 3.36 |
| chr5 | 10701363 | 10702612 | 1.68 |
| chr5 | 10824323 | 10825260 | 1.68 |
| chr5 | 11173840 | 11174605 | 1.35 |
| chr5 | 11828338 | 11830201 | 5.72 |
| chr5 | 11903944 | 11905190 | 3.7  |
| chr5 | 12030586 | 12031977 | 4.37 |
| chr5 | 12133380 | 12134764 | 3.7  |
| chr5 | 12140956 | 12141929 | 3.03 |
| chr5 | 12298775 | 12299930 | 4.04 |
| chr5 | 12332618 | 12333570 | 1.68 |
| chr5 | 12469658 | 12470618 | 3.36 |

|      |          |          |      |
|------|----------|----------|------|
| chr5 | 12511342 | 12512353 | 4.37 |
| chr5 | 12515968 | 12517060 | 4.04 |
| chr5 | 12636021 | 12636822 | 2.69 |
| chr5 | 12716929 | 12718298 | 4.37 |
| chr5 | 12824885 | 12826671 | 4.37 |
| chr5 | 12857109 | 12858206 | 4.04 |
| chr5 | 13072441 | 13073737 | 6.39 |
| chr5 | 13080561 | 13081481 | 3.7  |
| chr5 | 13226665 | 13227830 | 2.69 |
| chr5 | 13879197 | 13881610 | 4.37 |
| chr5 | 14142012 | 14142839 | 2.69 |
| chr5 | 14143801 | 14144996 | 4.37 |
| chr5 | 14163851 | 14165180 | 5.38 |
| chr5 | 14166891 | 14167704 | 3.36 |
| chr5 | 14177724 | 14178556 | 2.02 |
| chr5 | 14255430 | 14257703 | 6.05 |
| chr5 | 14574891 | 14575621 | 3.7  |
| chr5 | 14580449 | 14581323 | 4.37 |
| chr5 | 14585291 | 14586261 | 2.02 |
| chr5 | 14601452 | 14602206 | 1.35 |
| chr5 | 14664239 | 14665130 | 3.36 |
| chr5 | 14819191 | 14819964 | 3.36 |
| chr5 | 14849204 | 14850809 | 2.69 |
| chr5 | 14940898 | 14941747 | 3.03 |
| chr5 | 15014602 | 15015721 | 1.01 |
| chr5 | 15089939 | 15090968 | 1.35 |
| chr5 | 15351273 | 15352057 | 2.02 |
| chr5 | 15995485 | 15996331 | 2.69 |
| chr5 | 16178640 | 16179362 | 4.37 |
| chr5 | 16494807 | 16496133 | 4.71 |
| chr5 | 16505543 | 16506397 | 1.35 |
| chr5 | 16735950 | 16737969 | 4.04 |
| chr5 | 16896942 | 16898017 | 5.38 |
| chr5 | 16934840 | 16936952 | 3.36 |
| chr5 | 16946516 | 16947575 | 3.36 |
| chr5 | 17215743 | 17217058 | 4.04 |
| chr5 | 17218346 | 17219620 | 4.04 |
| chr5 | 17260890 | 17262043 | 2.69 |
| chr5 | 17277374 | 17278195 | 2.35 |
| chr5 | 17301945 | 17302835 | 3.36 |
| chr5 | 17335560 | 17337554 | 4.71 |
| chr5 | 17343438 | 17344364 | 3.36 |
| chr5 | 17362695 | 17363502 | 3.7  |

|      |          |          |      |
|------|----------|----------|------|
| chr5 | 17666179 | 17667179 | 2.69 |
| chr5 | 18196599 | 18198830 | 4.71 |
| chr5 | 18496119 | 18498105 | 6.39 |
| chr5 | 18548468 | 18549341 | 3.36 |
| chr5 | 18593890 | 18595323 | 5.38 |
| chr5 | 18952197 | 18953132 | 2.35 |
| chr5 | 19275494 | 19277692 | 4.04 |
| chr5 | 19601690 | 19602909 | 3.7  |
| chr5 | 19732843 | 19735601 | 6.39 |
| chr5 | 19752696 | 19754197 | 4.37 |
| chr5 | 19759884 | 19761665 | 4.04 |
| chr5 | 19846477 | 19847710 | 5.05 |
| chr5 | 20085614 | 20087005 | 4.37 |
| chr5 | 20108885 | 20110245 | 4.71 |
| chr5 | 20197279 | 20199856 | 4.04 |
| chr5 | 20347455 | 20350169 | 5.05 |
| chr5 | 20501782 | 20502733 | 4.04 |
| chr5 | 20544985 | 20546232 | 4.37 |
| chr5 | 20947507 | 20948264 | 4.04 |
| chr5 | 21018946 | 21020284 | 3.7  |
| chr5 | 21105911 | 21107335 | 4.71 |
| chr5 | 21132625 | 21134284 | 6.39 |
| chr5 | 21170707 | 21171733 | 4.04 |
| chr5 | 21257386 | 21258394 | 3.36 |
| chr5 | 21479901 | 21480679 | 5.38 |
| chr5 | 21481053 | 21482338 | 4.71 |
| chr5 | 21483343 | 21484131 | 4.04 |
| chr5 | 21564729 | 21565530 | 2.69 |
| chr5 | 21566410 | 21567277 | 3.36 |
| chr5 | 21568436 | 21569579 | 3.7  |
| chr5 | 21698429 | 21699338 | 1.68 |
| chr5 | 21703389 | 21704235 | 1.68 |
| chr5 | 22070061 | 22071148 | 4.37 |
| chr5 | 22077057 | 22077909 | 2.02 |
| chr5 | 22266647 | 22267390 | 2.02 |
| chr5 | 22292607 | 22294263 | 7.06 |
| chr5 | 22605393 | 22608618 | 6.05 |
| chr5 | 22648807 | 22650145 | 5.05 |
| chr5 | 22719267 | 22721852 | 4.37 |
| chr5 | 22929437 | 22930202 | 3.7  |
| chr5 | 23000455 | 23001200 | 3.03 |
| chr5 | 23217025 | 23218577 | 3.36 |
| chr5 | 23219726 | 23221848 | 4.71 |

|      |          |          |      |
|------|----------|----------|------|
| chr5 | 23276062 | 23278829 | 5.05 |
| chr5 | 23333259 | 23334305 | 3.7  |
| chr5 | 23361666 | 23363055 | 5.72 |
| chr5 | 23379951 | 23381018 | 3.36 |
| chr5 | 23393919 | 23395544 | 3.7  |
| chr5 | 23397689 | 23399113 | 3.7  |
| chr5 | 23426158 | 23427842 | 3.36 |
| chr5 | 23454600 | 23457745 | 5.38 |
| chr5 | 23490889 | 23491760 | 4.04 |
| chr5 | 23494113 | 23495304 | 4.71 |
| chr5 | 23498690 | 23500318 | 4.04 |
| chr5 | 23612618 | 23614947 | 3.7  |
| chr5 | 23674507 | 23676245 | 4.71 |
| chr5 | 23694764 | 23695697 | 3.36 |
| chr5 | 23740017 | 23741001 | 3.36 |
| chr5 | 23749980 | 23751391 | 6.05 |
| chr5 | 23895528 | 23897077 | 3.7  |
| chr5 | 23897820 | 23899003 | 4.04 |
| chr5 | 23976922 | 23978303 | 7.4  |
| chr5 | 24157074 | 24157882 | 3.03 |
| chr5 | 24620881 | 24621678 | 2.69 |
| chr5 | 24682221 | 24683527 | 5.05 |
| chr5 | 24686386 | 24688112 | 6.73 |
| chr5 | 24803747 | 24804647 | 1.68 |
| chr5 | 25247693 | 25248470 | 1.68 |
| chr5 | 25662162 | 25663573 | 3.7  |
| chr5 | 25754194 | 25756123 | 11.1 |
| chr5 | 26253955 | 26254876 | 1.35 |
| chr5 | 26281818 | 26283026 | 1.68 |
| chr5 | 26492756 | 26494030 | 2.35 |
| chr5 | 26642320 | 26643229 | 1.35 |
| chr5 | 26713144 | 26713941 | 1.01 |
| chr5 | 27153672 | 27155203 | 5.38 |
| chr5 | 27155743 | 27159461 | 3.7  |
| chr5 | 27475860 | 27477385 | 4.71 |
| chr5 | 28012296 | 28014933 | 5.05 |
| chr5 | 28125747 | 28126820 | 2.69 |
| chr5 | 28666910 | 28668770 | 7.4  |
| chr5 | 29353015 | 29354327 | 4.71 |
| chr5 | 29963544 | 29964764 | 4.37 |
| chr5 | 30141730 | 30143709 | 4.37 |
| chr5 | 30287556 | 30288345 | 2.69 |
| chr5 | 30440099 | 30440767 | 3.36 |



|      |          |          |       |
|------|----------|----------|-------|
| chr5 | 30758773 | 30759495 | 2.02  |
| chr5 | 31772076 | 31772840 | 3.03  |
| chr5 | 31858696 | 31860136 | 5.38  |
| chr5 | 32187544 | 32188703 | 4.37  |
| chr5 | 32321426 | 32322772 | 5.38  |
| chr5 | 32336871 | 32337895 | 3.7   |
| chr5 | 32338642 | 32341447 | 16.15 |
| chr5 | 32346464 | 32347851 | 6.73  |
| chr5 | 32683909 | 32685193 | 5.72  |
| chr5 | 32752617 | 32753427 | 2.02  |
| chr5 | 32858423 | 32859926 | 5.05  |
| chr5 | 33040681 | 33042182 | 4.04  |
| chr5 | 33107664 | 33108952 | 4.04  |
| chr5 | 33136407 | 33137836 | 2.69  |
| chr5 | 33440179 | 33441808 | 4.37  |
| chr5 | 33905391 | 33908123 | 7.06  |
| chr5 | 34189943 | 34190877 | 1.68  |
| chr5 | 34191845 | 34193136 | 1.35  |
| chr5 | 34407950 | 34408776 | 0.67  |
| chr5 | 34419289 | 34420526 | 7.06  |
| chr5 | 34459390 | 34461103 | 11.44 |
| chr5 | 34544114 | 34546340 | 4.71  |
| chr5 | 34556195 | 34557066 | 1.68  |
| chr5 | 34637062 | 34638111 | 1.68  |
| chr5 | 34727249 | 34728095 | 3.36  |
| chr5 | 34914782 | 34916412 | 4.71  |
| chr5 | 35306571 | 35307540 | 3.7   |
| chr5 | 35556861 | 35558280 | 3.36  |
| chr5 | 35842531 | 35843864 | 5.05  |
| chr5 | 36008777 | 36009758 | 3.7   |
| chr5 | 36012645 | 36014757 | 5.38  |
| chr5 | 36084989 | 36086332 | 3.36  |
| chr5 | 36138916 | 36139949 | 2.69  |
| chr5 | 36744852 | 36745995 | 3.7   |
| chr5 | 36763173 | 36764210 | 2.69  |
| chr5 | 37209044 | 37209910 | 1.68  |
| chr5 | 37254022 | 37255389 | 5.05  |
| chr5 | 37261228 | 37262527 | 6.05  |
| chr5 | 37282830 | 37284254 | 9.42  |
| chr5 | 37379033 | 37379778 | 4.37  |
| chr5 | 37774515 | 37775838 | 2.69  |
| chr5 | 37958670 | 37959960 | 5.05  |
| chr5 | 38617824 | 38619174 | 6.05  |

|      |          |          |       |
|------|----------|----------|-------|
| chr5 | 39124080 | 39124988 | 1.68  |
| chr5 | 39605692 | 39606910 | 4.37  |
| chr5 | 39640080 | 39641146 | 3.36  |
| chr5 | 39716272 | 39717300 | 3.7   |
| chr5 | 40087080 | 40088031 | 3.36  |
| chr5 | 40088958 | 40090315 | 5.05  |
| chr5 | 40090952 | 40092428 | 6.73  |
| chr5 | 40121013 | 40123261 | 3.7   |
| chr5 | 40123894 | 40125533 | 12.11 |
| chr5 | 40834867 | 40836052 | 4.71  |
| chr5 | 40882068 | 40883106 | 3.7   |
| chr5 | 40923769 | 40925095 | 4.71  |
| chr5 | 41230160 | 41231324 | 4.04  |
| chr5 | 41959920 | 41961364 | 2.35  |
| chr5 | 41997804 | 41998903 | 2.02  |
| chr5 | 42106995 | 42108069 | 3.7   |
| chr5 | 42109162 | 42110136 | 4.04  |
| chr5 | 42302142 | 42302974 | 1.35  |
| chr5 | 42319047 | 42320286 | 8.07  |
| chr5 | 42392667 | 42393594 | 5.05  |
| chr5 | 42582975 | 42583847 | 3.7   |
| chr5 | 42951478 | 42952240 | 3.03  |
| chr5 | 42976879 | 42977695 | 1.35  |
| chr5 | 42984991 | 42986026 | 4.04  |
| chr5 | 42989518 | 42990455 | 3.7   |
| chr5 | 42991767 | 42992945 | 4.04  |
| chr5 | 43041818 | 43043361 | 3.36  |
| chr5 | 43083997 | 43086040 | 7.06  |
| chr5 | 43105281 | 43106561 | 5.05  |
| chr5 | 43358700 | 43360543 | 4.37  |
| chr5 | 43556278 | 43557198 | 3.7   |
| chr5 | 43622352 | 43623352 | 2.02  |
| chr5 | 43634703 | 43635640 | 2.02  |
| chr5 | 43815174 | 43816645 | 8.41  |
| chr5 | 43997396 | 43998688 | 4.04  |
| chr5 | 44155015 | 44158738 | 7.06  |
| chr5 | 44656028 | 44658029 | 5.05  |
| chr5 | 44786054 | 44787946 | 5.72  |
| chr5 | 44795266 | 44796469 | 4.37  |
| chr5 | 44982661 | 44983874 | 4.71  |
| chr5 | 45800012 | 45801221 | 3.7   |
| chr5 | 45825601 | 45826656 | 1.68  |
| chr5 | 45909734 | 45911317 | 4.37  |

|      |          |          |      |
|------|----------|----------|------|
| chr5 | 45913650 | 45915714 | 3.36 |
| chr5 | 45916493 | 45918023 | 3.7  |
| chr5 | 45919690 | 45921869 | 4.04 |
| chr5 | 45929469 | 45930211 | 3.03 |
| chr5 | 45935734 | 45937463 | 4.37 |
| chr5 | 45940803 | 45944582 | 4.37 |
| chr5 | 45945504 | 45947477 | 4.37 |
| chr5 | 45948523 | 45950607 | 4.04 |
| chr5 | 45951135 | 45953904 | 4.37 |
| chr5 | 45955286 | 45958032 | 4.04 |
| chr5 | 45959007 | 45960935 | 3.7  |
| chr5 | 45961509 | 45964111 | 6.05 |
| chr5 | 45964561 | 45970120 | 4.71 |
| chr5 | 45971043 | 45972499 | 4.37 |
| chr5 | 45974597 | 45977315 | 5.72 |
| chr5 | 45982568 | 45983995 | 3.7  |
| chr5 | 45984326 | 45993892 | 4.71 |
| chr5 | 45995254 | 45997141 | 3.7  |
| chr5 | 46010472 | 46016758 | 4.71 |
| chr5 | 46017572 | 46018984 | 4.04 |
| chr5 | 46021501 | 46024182 | 5.38 |
| chr5 | 46026127 | 46028163 | 5.38 |
| chr5 | 46032523 | 46033892 | 5.72 |
| chr5 | 46039654 | 46041107 | 4.04 |
| chr5 | 46042889 | 46044163 | 3.7  |
| chr5 | 46047425 | 46049190 | 4.37 |
| chr5 | 46049683 | 46055312 | 5.38 |
| chr5 | 46055887 | 46063458 | 5.38 |
| chr5 | 46063676 | 46069436 | 5.05 |
| chr5 | 46069652 | 46072806 | 5.38 |
| chr5 | 46074199 | 46080971 | 4.71 |
| chr5 | 46081769 | 46084227 | 5.05 |
| chr5 | 46084660 | 46087777 | 5.05 |
| chr5 | 46097159 | 46097876 | 3.7  |
| chr5 | 46118822 | 46120275 | 4.37 |
| chr5 | 46121680 | 46123060 | 4.04 |
| chr5 | 46123339 | 46126277 | 4.04 |
| chr5 | 46126509 | 46128160 | 3.7  |
| chr5 | 46136635 | 46139672 | 4.04 |
| chr5 | 46140304 | 46141948 | 3.7  |
| chr5 | 46142650 | 46144207 | 3.7  |
| chr5 | 46146294 | 46148240 | 4.37 |
| chr5 | 46149511 | 46151984 | 5.05 |

|      |          |          |       |
|------|----------|----------|-------|
| chr5 | 46152482 | 46155060 | 4.37  |
| chr5 | 46169115 | 46171137 | 7.74  |
| chr5 | 46172319 | 46178726 | 4.71  |
| chr5 | 46179786 | 46187933 | 4.71  |
| chr5 | 46188344 | 46190572 | 4.04  |
| chr5 | 46199453 | 46201548 | 4.37  |
| chr5 | 46208030 | 46209051 | 3.7   |
| chr5 | 46209662 | 46211542 | 5.38  |
| chr5 | 46212259 | 46213048 | 3.36  |
| chr5 | 46220517 | 46221736 | 5.05  |
| chr5 | 46222197 | 46224227 | 4.04  |
| chr5 | 46228172 | 46233893 | 6.39  |
| chr5 | 46235776 | 46238973 | 4.37  |
| chr5 | 46239358 | 46244140 | 5.05  |
| chr5 | 46244839 | 46247276 | 3.7   |
| chr5 | 46248414 | 46251171 | 5.05  |
| chr5 | 46251877 | 46255056 | 4.71  |
| chr5 | 46255514 | 46259506 | 5.05  |
| chr5 | 46263351 | 46265038 | 4.04  |
| chr5 | 46265556 | 46266647 | 3.7   |
| chr5 | 46267035 | 46270463 | 5.38  |
| chr5 | 46275339 | 46277348 | 4.04  |
| chr5 | 46278015 | 46287303 | 6.05  |
| chr5 | 46287864 | 46299978 | 5.38  |
| chr5 | 46300249 | 46302414 | 4.37  |
| chr5 | 46302997 | 46305108 | 4.71  |
| chr5 | 46305419 | 46307211 | 5.05  |
| chr5 | 46309088 | 46313225 | 5.38  |
| chr5 | 46318413 | 46321676 | 4.37  |
| chr5 | 46324690 | 46327179 | 5.05  |
| chr5 | 46340207 | 46341710 | 6.73  |
| chr5 | 46344761 | 46345903 | 4.37  |
| chr5 | 46363420 | 46364965 | 6.39  |
| chr5 | 46366370 | 46367823 | 4.37  |
| chr5 | 46377102 | 46377897 | 6.05  |
| chr5 | 46379422 | 46380704 | 4.37  |
| chr5 | 46384162 | 46385029 | 5.05  |
| chr5 | 46393579 | 46394632 | 3.7   |
| chr5 | 46397638 | 46399099 | 5.38  |
| chr5 | 49405571 | 49406108 | 9.08  |
| chr5 | 49414245 | 49414634 | 8.41  |
| chr5 | 49434754 | 49435354 | 6.39  |
| chr5 | 49439404 | 49440839 | 16.15 |

|      |          |          |       |
|------|----------|----------|-------|
| chr5 | 49484111 | 49485482 | 6.05  |
| chr5 | 49546092 | 49547364 | 4.04  |
| chr5 | 49551577 | 49552487 | 4.04  |
| chr5 | 49955447 | 49956476 | 1.68  |
| chr5 | 51091536 | 51092309 | 2.02  |
| chr5 | 51239800 | 51241138 | 6.39  |
| chr5 | 52684402 | 52685394 | 4.04  |
| chr5 | 52989735 | 52991253 | 6.73  |
| chr5 | 53047524 | 53049126 | 9.75  |
| chr5 | 53252013 | 53253331 | 2.35  |
| chr5 | 53642734 | 53643813 | 6.73  |
| chr5 | 54152870 | 54154591 | 7.4   |
| chr5 | 54726797 | 54727945 | 3.7   |
| chr5 | 55601699 | 55602947 | 5.72  |
| chr5 | 55630540 | 55631463 | 4.04  |
| chr5 | 55683763 | 55684920 | 4.04  |
| chr5 | 55691172 | 55692958 | 4.37  |
| chr5 | 55913359 | 55914798 | 4.37  |
| chr5 | 56114261 | 56115239 | 3.36  |
| chr5 | 56504807 | 56505931 | 5.38  |
| chr5 | 56623403 | 56624189 | 3.7   |
| chr5 | 57157886 | 57159237 | 7.4   |
| chr5 | 57260677 | 57262606 | 4.37  |
| chr5 | 57365119 | 57366408 | 3.36  |
| chr5 | 57389577 | 57391759 | 5.38  |
| chr5 | 57394755 | 57395801 | 3.36  |
| chr5 | 57431575 | 57433070 | 3.36  |
| chr5 | 57674148 | 57677666 | 11.77 |
| chr5 | 57678005 | 57679518 | 3.7   |
| chr5 | 57770781 | 57772079 | 5.38  |
| chr5 | 58703356 | 58704762 | 4.04  |
| chr5 | 59008446 | 59010105 | 7.74  |
| chr5 | 59864082 | 59865198 | 5.05  |
| chr5 | 59954851 | 59955837 | 4.71  |
| chr5 | 59964259 | 59965763 | 3.7   |
| chr5 | 60005840 | 60007094 | 3.7   |
| chr5 | 60164657 | 60166125 | 3.7   |
| chr5 | 60288495 | 60290873 | 5.05  |
| chr5 | 60550762 | 60551717 | 4.71  |
| chr5 | 60626359 | 60627236 | 3.7   |
| chr5 | 60737667 | 60739292 | 7.4   |
| chr5 | 61341348 | 61342036 | 1.01  |
| chr5 | 61457857 | 61459077 | 4.04  |

|      |          |          |      |
|------|----------|----------|------|
| chr5 | 61488242 | 61489544 | 5.05 |
| chr5 | 61917653 | 61918463 | 2.35 |
| chr5 | 62259853 | 62261253 | 4.37 |
| chr5 | 62280758 | 62282374 | 2.02 |
| chr5 | 62327653 | 62329526 | 5.38 |
| chr5 | 63156262 | 63157115 | 2.35 |
| chr5 | 64063959 | 64065261 | 4.71 |
| chr5 | 64525198 | 64526113 | 3.36 |
| chr5 | 65439075 | 65440087 | 4.04 |
| chr5 | 65762601 | 65766559 | 11.1 |
| chr5 | 65778898 | 65781580 | 4.04 |
| chr5 | 65816279 | 65817557 | 6.73 |
| chr5 | 66530975 | 66532351 | 3.36 |
| chr5 | 66544023 | 66544942 | 3.7  |
| chr5 | 66573155 | 66575326 | 7.06 |
| chr5 | 66626951 | 66627894 | 4.04 |
| chr5 | 67191396 | 67192882 | 3.36 |
| chr5 | 67342844 | 67344924 | 4.04 |
| chr5 | 67510857 | 67511807 | 3.36 |
| chr5 | 67729332 | 67730317 | 4.71 |
| chr5 | 67792988 | 67794412 | 6.39 |
| chr5 | 68227670 | 68230660 | 8.41 |
| chr5 | 68628031 | 68629241 | 3.03 |
| chr5 | 68788371 | 68789760 | 4.04 |
| chr5 | 71145473 | 71146649 | 8.41 |
| chr5 | 71181941 | 71182815 | 3.03 |
| chr5 | 71695766 | 71697687 | 6.73 |
| chr5 | 71976410 | 71977426 | 4.04 |
| chr5 | 73371454 | 73372493 | 4.04 |
| chr5 | 73819325 | 73820305 | 4.37 |
| chr5 | 73935845 | 73937149 | 4.37 |
| chr5 | 74212522 | 74213414 | 3.7  |
| chr5 | 74290129 | 74291213 | 1.68 |
| chr5 | 74301238 | 74302280 | 4.37 |
| chr5 | 74345203 | 74346058 | 4.04 |
| chr5 | 75084773 | 75085939 | 4.71 |
| chr5 | 76464303 | 76465464 | 3.7  |
| chr5 | 76526137 | 76527206 | 2.02 |
| chr5 | 76932132 | 76933077 | 1.35 |
| chr5 | 77590023 | 77591259 | 5.05 |
| chr5 | 78369063 | 78370253 | 4.71 |
| chr5 | 78531174 | 78532324 | 3.36 |
| chr5 | 78843531 | 78844459 | 4.04 |

|      |           |           |       |
|------|-----------|-----------|-------|
| chr5 | 78874011  | 78875414  | 3.7   |
| chr5 | 78913077  | 78914107  | 3.7   |
| chr5 | 79015298  | 79017362  | 5.38  |
| chr5 | 79286203  | 79287534  | 4.04  |
| chr5 | 79758645  | 79759983  | 6.39  |
| chr5 | 80507716  | 80508605  | 1.35  |
| chr5 | 80587042  | 80588451  | 5.38  |
| chr5 | 80905278  | 80906462  | 3.7   |
| chr5 | 82130333  | 82132127  | 5.72  |
| chr5 | 82196955  | 82198997  | 4.71  |
| chr5 | 82270638  | 82271802  | 4.04  |
| chr5 | 82642861  | 82646234  | 5.72  |
| chr5 | 82909863  | 82911142  | 6.39  |
| chr5 | 83062649  | 83064290  | 8.75  |
| chr5 | 84780417  | 84781896  | 6.73  |
| chr5 | 85760392  | 85762056  | 5.38  |
| chr5 | 86064240  | 86065570  | 5.38  |
| chr5 | 87016868  | 87017798  | 4.04  |
| chr5 | 87484031  | 87485345  | 4.37  |
| chr5 | 88494685  | 88496074  | 2.02  |
| chr5 | 89188934  | 89189938  | 4.71  |
| chr5 | 90886045  | 90888058  | 11.44 |
| chr5 | 90953378  | 90954148  | 3.7   |
| chr5 | 91097810  | 91099446  | 6.73  |
| chr5 | 91361940  | 91362828  | 4.37  |
| chr5 | 91756321  | 91758917  | 9.75  |
| chr5 | 91848158  | 91849526  | 6.39  |
| chr5 | 92131193  | 92132149  | 5.38  |
| chr5 | 92210110  | 92211358  | 3.03  |
| chr5 | 92798506  | 92799566  | 5.05  |
| chr5 | 93378477  | 93379398  | 3.36  |
| chr5 | 93876008  | 93878686  | 7.06  |
| chr5 | 93975381  | 93976821  | 6.39  |
| chr5 | 95066453  | 95068166  | 3.7   |
| chr5 | 96142950  | 96144135  | 4.04  |
| chr5 | 96270930  | 96271914  | 3.7   |
| chr5 | 96905471  | 96906722  | 4.71  |
| chr5 | 97139014  | 97140370  | 5.05  |
| chr5 | 97684930  | 97686339  | 8.07  |
| chr5 | 98687366  | 98688559  | 4.04  |
| chr5 | 99496942  | 99498674  | 7.4   |
| chr5 | 99760136  | 99761554  | 5.05  |
| chr5 | 100129423 | 100130929 | 7.74  |

|      |           |           |      |
|------|-----------|-----------|------|
| chr5 | 100510545 | 100511690 | 4.04 |
| chr5 | 100732584 | 100733312 | 4.37 |
| chr5 | 101557442 | 101559090 | 4.37 |
| chr5 | 102410074 | 102411938 | 3.7  |
| chr5 | 102418871 | 102420250 | 5.38 |
| chr5 | 102455241 | 102456443 | 4.37 |
| chr5 | 103056276 | 103057669 | 5.05 |
| chr5 | 103128298 | 103130333 | 9.75 |
| chr5 | 103353654 | 103354700 | 5.72 |
| chr5 | 103514850 | 103516375 | 8.07 |
| chr5 | 103521501 | 103522749 | 4.71 |
| chr5 | 103929957 | 103931783 | 6.73 |
| chr5 | 104013121 | 104014523 | 3.7  |
| chr5 | 104032132 | 104035698 | 5.72 |
| chr5 | 104392345 | 104394321 | 4.37 |
| chr5 | 104428693 | 104430010 | 5.05 |
| chr5 | 104753995 | 104756401 | 4.71 |
| chr5 | 104795778 | 104797702 | 4.37 |
| chr5 | 104938653 | 104939978 | 4.04 |
| chr5 | 104942455 | 104943762 | 3.7  |
| chr5 | 105037476 | 105038841 | 2.02 |
| chr5 | 105096377 | 105097320 | 4.04 |
| chr5 | 105097933 | 105099027 | 4.04 |
| chr5 | 105201350 | 105202206 | 3.7  |
| chr5 | 105218176 | 105219122 | 4.04 |
| chr5 | 105367287 | 105368057 | 4.37 |
| chr5 | 105515000 | 105516485 | 4.04 |
| chr5 | 105576600 | 105577921 | 5.05 |
| chr5 | 105877466 | 105881293 | 6.39 |
| chr5 | 106211830 | 106213441 | 5.72 |
| chr5 | 106505874 | 106507168 | 7.4  |
| chr5 | 106600862 | 106601749 | 4.04 |
| chr5 | 108063425 | 108064238 | 3.36 |
| chr5 | 108621031 | 108622659 | 3.36 |
| chr5 | 108655086 | 108655893 | 1.01 |
| chr5 | 109024278 | 109025851 | 4.04 |
| chr5 | 110164083 | 110165356 | 6.39 |
| chr5 | 110427376 | 110428733 | 5.38 |
| chr5 | 110974432 | 110976376 | 4.37 |
| chr5 | 111016216 | 111017134 | 3.36 |
| chr5 | 111967108 | 111968502 | 4.04 |
| chr5 | 112866818 | 112868215 | 5.38 |
| chr5 | 113040820 | 113041666 | 3.36 |



|      |           |           |       |
|------|-----------|-----------|-------|
| chr5 | 113535601 | 113536465 | 1.35  |
| chr5 | 114500697 | 114501703 | 3.7   |
| chr5 | 114501947 | 114503587 | 5.72  |
| chr5 | 114880018 | 114881452 | 4.37  |
| chr5 | 115612337 | 115613621 | 4.37  |
| chr5 | 115880824 | 115882025 | 4.71  |
| chr5 | 115996482 | 115998045 | 3.7   |
| chr5 | 116790883 | 116792088 | 4.71  |
| chr5 | 117047599 | 117050992 | 24.22 |
| chr5 | 117273257 | 117279233 | 5.72  |
| chr5 | 117345036 | 117346299 | 4.71  |
| chr5 | 117415602 | 117416421 | 4.71  |
| chr5 | 117544508 | 117546547 | 6.39  |
| chr5 | 117584171 | 117585305 | 3.03  |
| chr5 | 117832626 | 117833608 | 4.04  |
| chr5 | 117991622 | 117995662 | 16.15 |
| chr5 | 118038387 | 118039913 | 4.04  |
| chr5 | 118111439 | 118112453 | 3.36  |
| chr5 | 118330830 | 118332920 | 10.43 |
| chr5 | 118335254 | 118336610 | 4.04  |
| chr5 | 118405546 | 118406704 | 4.04  |
| chr5 | 118590580 | 118591640 | 3.36  |
| chr5 | 118592522 | 118594204 | 4.37  |
| chr5 | 118596009 | 118597831 | 3.36  |
| chr5 | 118598265 | 118599280 | 3.7   |
| chr5 | 118755393 | 118756594 | 5.38  |
| chr5 | 118803679 | 118804866 | 5.05  |
| chr5 | 119001847 | 119002649 | 3.36  |
| chr5 | 121591669 | 121594042 | 4.04  |
| chr5 | 121814370 | 121815491 | 4.71  |
| chr5 | 121936057 | 121937363 | 3.7   |
| chr5 | 122110094 | 122110911 | 1.68  |
| chr5 | 122387212 | 122388165 | 3.7   |
| chr5 | 122491057 | 122491866 | 3.7   |
| chr5 | 122847186 | 122848290 | 6.05  |
| chr5 | 122961325 | 122962656 | 2.69  |
| chr5 | 123001130 | 123002128 | 3.7   |
| chr5 | 123067248 | 123068865 | 6.73  |
| chr5 | 123271541 | 123274498 | 5.05  |
| chr5 | 123342963 | 123344184 | 3.7   |
| chr5 | 123489949 | 123491416 | 6.05  |
| chr5 | 123507737 | 123508924 | 4.37  |
| chr5 | 123538420 | 123541225 | 9.42  |

|      |           |           |      |
|------|-----------|-----------|------|
| chr5 | 123580448 | 123581732 | 4.04 |
| chr5 | 123598518 | 123599660 | 4.71 |
| chr5 | 123667292 | 123668009 | 4.04 |
| chr5 | 123717688 | 123720272 | 6.05 |
| chr5 | 124408409 | 124409742 | 4.71 |
| chr5 | 124589633 | 124590785 | 4.04 |
| chr5 | 124982355 | 124983266 | 4.04 |
| chr5 | 125040132 | 125041149 | 3.7  |
| chr5 | 125223681 | 125224380 | 1.68 |
| chr5 | 125364443 | 125365868 | 5.05 |
| chr5 | 125735706 | 125737158 | 5.38 |
| chr5 | 125980423 | 125981600 | 4.04 |
| chr5 | 126111734 | 126112554 | 4.37 |
| chr5 | 126590299 | 126591257 | 3.7  |
| chr5 | 127081976 | 127082886 | 3.36 |
| chr5 | 127111603 | 127113131 | 3.7  |
| chr5 | 127270337 | 127271372 | 3.36 |
| chr5 | 127372613 | 127373473 | 4.04 |
| chr5 | 127419414 | 127420339 | 4.04 |
| chr5 | 127433073 | 127434087 | 3.36 |
| chr5 | 128429714 | 128430876 | 2.69 |
| chr5 | 128461599 | 128462894 | 7.4  |
| chr5 | 128495991 | 128498265 | 6.73 |
| chr5 | 128498582 | 128499751 | 4.04 |
| chr5 | 128512968 | 128513991 | 3.7  |
| chr5 | 128514350 | 128515152 | 3.03 |
| chr5 | 128522295 | 128524972 | 5.05 |
| chr5 | 128546960 | 128548447 | 4.71 |
| chr5 | 128549048 | 128550973 | 4.37 |
| chr5 | 128575448 | 128576804 | 3.7  |
| chr5 | 128590550 | 128591628 | 3.7  |
| chr5 | 128601454 | 128604829 | 5.38 |
| chr5 | 128615603 | 128616702 | 3.36 |
| chr5 | 128685010 | 128687279 | 3.36 |
| chr5 | 128700819 | 128702366 | 3.36 |
| chr5 | 128795678 | 128797192 | 4.04 |
| chr5 | 129240529 | 129241432 | 1.68 |
| chr5 | 129773344 | 129774624 | 5.38 |
| chr5 | 130995570 | 130997228 | 3.7  |
| chr5 | 131334320 | 131335096 | 1.68 |
| chr5 | 131567939 | 131568845 | 1.35 |
| chr5 | 131706327 | 131707182 | 3.7  |
| chr5 | 131831409 | 131832506 | 4.37 |

|      |           |           |       |
|------|-----------|-----------|-------|
| chr5 | 132299061 | 132299959 | 3.7   |
| chr5 | 132314920 | 132315729 | 4.04  |
| chr5 | 132361061 | 132362370 | 5.72  |
| chr5 | 132387005 | 132389180 | 3.7   |
| chr5 | 132400712 | 132401725 | 4.37  |
| chr5 | 132584375 | 132585515 | 4.04  |
| chr5 | 132793074 | 132794218 | 4.37  |
| chr5 | 132946368 | 132947464 | 4.04  |
| chr5 | 133328866 | 133329656 | 4.37  |
| chr5 | 133597776 | 133599086 | 4.71  |
| chr5 | 133619667 | 133621490 | 8.41  |
| chr5 | 133663243 | 133665268 | 8.75  |
| chr5 | 133706607 | 133707916 | 4.37  |
| chr5 | 133779551 | 133780380 | 3.03  |
| chr5 | 133801694 | 133802858 | 4.37  |
| chr5 | 133862102 | 133863113 | 3.03  |
| chr5 | 133883813 | 133884836 | 2.02  |
| chr5 | 134093554 | 134094803 | 4.04  |
| chr5 | 134181324 | 134182134 | 3.7   |
| chr5 | 134259352 | 134260956 | 13.45 |
| chr5 | 134262022 | 134263469 | 1.35  |
| chr5 | 134313093 | 134314083 | 3.7   |
| chr5 | 134317105 | 134318989 | 6.39  |
| chr5 | 134416439 | 134417529 | 4.04  |
| chr5 | 134470325 | 134471319 | 2.02  |
| chr5 | 135468356 | 135469337 | 4.04  |
| chr5 | 136716647 | 136718151 | 7.06  |
| chr5 | 137103578 | 137104594 | 3.7   |
| chr5 | 137561859 | 137562774 | 4.04  |
| chr5 | 137687530 | 137688353 | 4.37  |
| chr5 | 138088346 | 138089776 | 4.04  |
| chr5 | 138198766 | 138200089 | 5.05  |
| chr5 | 138483830 | 138484966 | 4.04  |
| chr5 | 138507351 | 138508169 | 4.37  |
| chr5 | 139017460 | 139018610 | 4.37  |
| chr5 | 139026853 | 139028209 | 3.7   |
| chr5 | 139028520 | 139029325 | 3.36  |
| chr5 | 139034004 | 139034802 | 2.35  |
| chr5 | 139099368 | 139100261 | 4.37  |
| chr5 | 139530299 | 139531149 | 2.02  |
| chr5 | 140006406 | 140008649 | 13.12 |
| chr5 | 140010793 | 140011874 | 4.71  |
| chr5 | 140069968 | 140070845 | 3.7   |

|      |           |           |       |
|------|-----------|-----------|-------|
| chr5 | 140141579 | 140146647 | 12.45 |
| chr5 | 140147252 | 140149727 | 4.37  |
| chr5 | 140150090 | 140151584 | 4.37  |
| chr5 | 140151964 | 140153083 | 4.04  |
| chr5 | 140155395 | 140156384 | 3.36  |
| chr5 | 140161993 | 140163878 | 4.04  |
| chr5 | 140169505 | 140170971 | 3.03  |
| chr5 | 140176609 | 140177517 | 3.7   |
| chr5 | 140488619 | 140489843 | 3.7   |
| chr5 | 140496000 | 140496731 | 3.7   |
| chr5 | 140513344 | 140514523 | 4.71  |
| chr5 | 140542846 | 140544176 | 4.71  |
| chr5 | 140575540 | 140576565 | 3.36  |
| chr5 | 140606377 | 140608648 | 4.04  |
| chr5 | 140610721 | 140612657 | 4.04  |
| chr5 | 140613559 | 140615193 | 4.37  |
| chr5 | 140616289 | 140617636 | 5.05  |
| chr5 | 140620158 | 140620970 | 3.7   |
| chr5 | 140621568 | 140622935 | 4.37  |
| chr5 | 140624689 | 140626055 | 3.7   |
| chr5 | 140627140 | 140628832 | 3.7   |
| chr5 | 140629140 | 140642278 | 12.78 |
| chr5 | 140643201 | 140647718 | 5.38  |
| chr5 | 140648091 | 140654171 | 4.04  |
| chr5 | 140654617 | 140655300 | 4.71  |
| chr5 | 140655552 | 140659238 | 4.37  |
| chr5 | 140659919 | 140663997 | 4.04  |
| chr5 | 140665187 | 140666053 | 3.36  |
| chr5 | 140666505 | 140668469 | 5.38  |
| chr5 | 140668850 | 140671034 | 3.7   |
| chr5 | 140672229 | 140676168 | 4.37  |
| chr5 | 140676550 | 140679152 | 4.37  |
| chr5 | 140681736 | 140689909 | 5.38  |
| chr5 | 140690754 | 140696789 | 6.39  |
| chr5 | 140697102 | 140700591 | 5.38  |
| chr5 | 140705575 | 140706388 | 3.7   |
| chr5 | 140709682 | 140710938 | 4.37  |
| chr5 | 140732551 | 140734509 | 3.7   |
| chr5 | 140735566 | 140737196 | 3.36  |
| chr5 | 140737882 | 140739308 | 3.36  |
| chr5 | 140741641 | 140742701 | 4.71  |
| chr5 | 140743808 | 140745216 | 3.7   |
| chr5 | 140750442 | 140755130 | 4.71  |

|      |           |           |       |
|------|-----------|-----------|-------|
| chr5 | 140758402 | 140759578 | 3.7   |
| chr5 | 140769882 | 140771554 | 4.37  |
| chr5 | 140788316 | 140790498 | 4.37  |
| chr5 | 140790980 | 140792311 | 3.7   |
| chr5 | 140793576 | 140794639 | 3.7   |
| chr5 | 140810795 | 140811873 | 3.7   |
| chr5 | 140854711 | 140855412 | 3.7   |
| chr5 | 141016734 | 141018128 | 2.69  |
| chr5 | 141044242 | 141044934 | 1.68  |
| chr5 | 141695352 | 141696419 | 3.7   |
| chr5 | 141723842 | 141725248 | 5.05  |
| chr5 | 141775490 | 141776459 | 3.7   |
| chr5 | 142422053 | 142422831 | 1.35  |
| chr5 | 142763492 | 142765582 | 8.07  |
| chr5 | 142858703 | 142859505 | 1.35  |
| chr5 | 142974192 | 142975480 | 4.04  |
| chr5 | 143313943 | 143314897 | 3.7   |
| chr5 | 143389537 | 143390598 | 3.7   |
| chr5 | 143456834 | 143457642 | 3.7   |
| chr5 | 144157454 | 144158531 | 1.68  |
| chr5 | 144756739 | 144757767 | 3.7   |
| chr5 | 146166066 | 146166974 | 1.01  |
| chr5 | 147380718 | 147382393 | 6.05  |
| chr5 | 147435279 | 147436083 | 3.7   |
| chr5 | 147644911 | 147645860 | 4.04  |
| chr5 | 148508375 | 148509448 | 4.04  |
| chr5 | 148648037 | 148649283 | 5.05  |
| chr5 | 148926008 | 148926901 | 3.7   |
| chr5 | 149046860 | 149049533 | 5.72  |
| chr5 | 149281027 | 149281817 | 1.01  |
| chr5 | 149348697 | 149349612 | 1.68  |
| chr5 | 149452352 | 149453287 | 4.04  |
| chr5 | 149828736 | 149830317 | 6.05  |
| chr5 | 149864975 | 149865825 | 2.69  |
| chr5 | 150080085 | 150081378 | 4.04  |
| chr5 | 150244583 | 150245387 | 3.36  |
| chr5 | 150250286 | 150251693 | 4.37  |
| chr5 | 150272076 | 150278420 | 11.44 |
| chr5 | 150291567 | 150292748 | 4.04  |
| chr5 | 150302216 | 150303746 | 3.7   |
| chr5 | 150307373 | 150308322 | 3.7   |
| chr5 | 150308946 | 150312764 | 7.74  |
| chr5 | 150312980 | 150313848 | 4.04  |

|      |           |           |       |
|------|-----------|-----------|-------|
| chr5 | 150323931 | 150324672 | 4.04  |
| chr5 | 150328175 | 150332286 | 6.39  |
| chr5 | 150334672 | 150335486 | 4.04  |
| chr5 | 150337016 | 150338499 | 3.36  |
| chr5 | 150339862 | 150341144 | 4.71  |
| chr5 | 150342084 | 150343899 | 4.71  |
| chr5 | 150357107 | 150359251 | 4.71  |
| chr5 | 150373712 | 150375179 | 4.04  |
| chr5 | 150796709 | 150798639 | 8.41  |
| chr5 | 151001952 | 151002759 | 1.35  |
| chr5 | 151234445 | 151235262 | 2.35  |
| chr5 | 151310438 | 151311735 | 5.38  |
| chr5 | 152066097 | 152066863 | 1.68  |
| chr5 | 153176370 | 153177412 | 1.35  |
| chr5 | 153418385 | 153419121 | 4.04  |
| chr5 | 153675924 | 153677165 | 4.71  |
| chr5 | 154053554 | 154054354 | 2.69  |
| chr5 | 154065602 | 154066895 | 5.05  |
| chr5 | 154092750 | 154093639 | 2.02  |
| chr5 | 154223966 | 154225105 | 4.71  |
| chr5 | 154236999 | 154238605 | 4.04  |
| chr5 | 154257724 | 154259069 | 6.73  |
| chr5 | 154264674 | 154266318 | 6.73  |
| chr5 | 154316655 | 154318455 | 4.04  |
| chr5 | 154675250 | 154676020 | 1.01  |
| chr5 | 154732252 | 154733600 | 6.05  |
| chr5 | 155221351 | 155222441 | 4.04  |
| chr5 | 156835396 | 156836860 | 3.7   |
| chr5 | 157083917 | 157086319 | 15.14 |
| chr5 | 157125083 | 157126643 | 7.4   |
| chr5 | 157459453 | 157460432 | 1.68  |
| chr5 | 158021696 | 158022729 | 4.04  |
| chr5 | 158812807 | 158814178 | 3.36  |
| chr5 | 158901624 | 158902914 | 2.35  |
| chr5 | 159037392 | 159038274 | 2.02  |
| chr5 | 164228387 | 164229706 | 5.72  |
| chr5 | 164319679 | 164320486 | 5.05  |
| chr5 | 167687156 | 167688106 | 2.35  |
| chr5 | 167711544 | 167712286 | 2.02  |
| chr5 | 168005461 | 168006403 | 3.36  |
| chr5 | 168027080 | 168028116 | 4.04  |
| chr5 | 168337672 | 168338553 | 1.01  |
| chr5 | 169068181 | 169069166 | 4.37  |

|      |           |           |      |
|------|-----------|-----------|------|
| chr5 | 169637871 | 169638898 | 3.36 |
| chr5 | 169810003 | 169810846 | 1.01 |
| chr5 | 169874422 | 169875337 | 4.04 |
| chr5 | 169876218 | 169877063 | 2.02 |
| chr5 | 169920137 | 169920853 | 2.02 |
| chr5 | 170160711 | 170161571 | 2.02 |
| chr5 | 170287241 | 170289203 | 5.72 |
| chr5 | 170449964 | 170451405 | 5.38 |
| chr5 | 170481966 | 170484306 | 18.5 |
| chr5 | 170493368 | 170495415 | 5.05 |
| chr5 | 170631545 | 170632483 | 2.02 |
| chr5 | 170673103 | 170674348 | 3.03 |
| chr5 | 170676084 | 170677248 | 3.03 |
| chr5 | 170955010 | 170955867 | 0.67 |
| chr5 | 171184552 | 171185404 | 1.35 |
| chr5 | 171192965 | 171194614 | 3.7  |
| chr5 | 171238820 | 171240082 | 5.05 |
| chr5 | 171285218 | 171286219 | 3.03 |
| chr5 | 171406294 | 171408142 | 7.4  |
| chr5 | 171432874 | 171434468 | 4.37 |
| chr5 | 171458421 | 171459637 | 4.71 |
| chr5 | 171614118 | 171615029 | 4.04 |
| chr5 | 171678482 | 171679908 | 4.04 |
| chr5 | 171685094 | 171686229 | 4.71 |
| chr5 | 171732247 | 171733088 | 5.05 |
| chr5 | 171797183 | 171798564 | 2.69 |
| chr5 | 171807634 | 171808605 | 3.7  |
| chr5 | 171877921 | 171878781 | 3.36 |
| chr5 | 172067924 | 172069472 | 3.03 |
| chr5 | 172082016 | 172083546 | 6.39 |
| chr5 | 172143001 | 172144169 | 3.7  |
| chr5 | 172196986 | 172199473 | 4.37 |
| chr5 | 172209002 | 172210466 | 5.38 |
| chr5 | 172331196 | 172332816 | 5.05 |
| chr5 | 172467306 | 172468074 | 3.7  |
| chr5 | 172527716 | 172529107 | 5.38 |
| chr5 | 172570826 | 172572155 | 5.38 |
| chr5 | 172626133 | 172628147 | 4.37 |
| chr5 | 172710322 | 172711405 | 4.04 |
| chr5 | 172729279 | 172730345 | 3.36 |
| chr5 | 172734575 | 172735651 | 4.37 |
| chr5 | 172754813 | 172757602 | 4.37 |
| chr5 | 172820071 | 172821081 | 4.04 |

|      |           |           |       |
|------|-----------|-----------|-------|
| chr5 | 172845596 | 172847129 | 5.72  |
| chr5 | 172876331 | 172877612 | 5.05  |
| chr5 | 172881409 | 172882932 | 4.04  |
| chr5 | 172887852 | 172889879 | 4.04  |
| chr5 | 172946398 | 172947803 | 4.37  |
| chr5 | 172948638 | 172951518 | 4.04  |
| chr5 | 172961979 | 172963340 | 4.37  |
| chr5 | 172986284 | 172991008 | 4.71  |
| chr5 | 172994116 | 172995961 | 3.7   |
| chr5 | 173006902 | 173009106 | 3.36  |
| chr5 | 173012670 | 173016404 | 6.05  |
| chr5 | 173016862 | 173020311 | 6.73  |
| chr5 | 173081646 | 173083171 | 3.7   |
| chr5 | 173146759 | 173147529 | 3.7   |
| chr5 | 173179761 | 173181154 | 4.71  |
| chr5 | 173254965 | 173255878 | 3.7   |
| chr5 | 173314352 | 173315222 | 3.7   |
| chr5 | 173580374 | 173581190 | 3.03  |
| chr5 | 173782229 | 173783337 | 3.7   |
| chr5 | 173842113 | 173843339 | 2.69  |
| chr5 | 173856809 | 173857771 | 2.35  |
| chr5 | 173905958 | 173907074 | 4.71  |
| chr5 | 173918454 | 173919278 | 4.71  |
| chr5 | 173924655 | 173931464 | 4.37  |
| chr5 | 174042420 | 174043817 | 4.04  |
| chr5 | 174392357 | 174393273 | 4.37  |
| chr5 | 174452739 | 174454336 | 5.05  |
| chr5 | 174501232 | 174503457 | 7.74  |
| chr5 | 174573348 | 174575265 | 4.04  |
| chr5 | 174619957 | 174620886 | 3.7   |
| chr5 | 174711807 | 174712757 | 4.04  |
| chr5 | 174715200 | 174716094 | 2.35  |
| chr5 | 174841401 | 174842290 | 2.35  |
| chr5 | 174920574 | 174921656 | 3.36  |
| chr5 | 175076663 | 175077752 | 4.04  |
| chr5 | 175112622 | 175113735 | 2.69  |
| chr5 | 175205682 | 175206972 | 5.05  |
| chr5 | 175347400 | 175350229 | 4.04  |
| chr5 | 175843022 | 175844409 | 6.05  |
| chr5 | 175847546 | 175848745 | 5.05  |
| chr5 | 175852165 | 175854284 | 10.09 |
| chr5 | 175873760 | 175875507 | 4.04  |
| chr5 | 175948664 | 175949673 | 1.68  |



|      |           |           |      |
|------|-----------|-----------|------|
| chr5 | 176144700 | 176145606 | 2.35 |
| chr5 | 176192305 | 176193293 | 2.69 |
| chr5 | 176220353 | 176221353 | 3.03 |
| chr5 | 176237027 | 176238277 | 3.7  |
| chr5 | 176348093 | 176348925 | 1.68 |
| chr5 | 176420889 | 176422281 | 5.05 |
| chr5 | 176433458 | 176434361 | 4.37 |
| chr5 | 176449282 | 176450187 | 3.36 |
| chr5 | 176765870 | 176767004 | 3.7  |
| chr5 | 176816264 | 176817848 | 5.05 |
| chr5 | 176829217 | 176831742 | 4.37 |
| chr5 | 176850791 | 176851761 | 1.68 |
| chr5 | 176853852 | 176855334 | 3.7  |
| chr5 | 176880875 | 176883809 | 5.72 |
| chr5 | 176914596 | 176915421 | 3.03 |
| chr5 | 176980495 | 176981357 | 3.36 |
| chr5 | 176988014 | 176989988 | 6.39 |
| chr5 | 177026504 | 177027732 | 5.72 |
| chr5 | 177501327 | 177503877 | 5.05 |
| chr5 | 177504670 | 177506142 | 6.05 |
| chr5 | 177507003 | 177509239 | 4.71 |
| chr5 | 177511223 | 177512330 | 4.37 |
| chr5 | 177512791 | 177514897 | 5.72 |
| chr5 | 177517563 | 177518525 | 4.04 |
| chr5 | 177524079 | 177526293 | 4.71 |
| chr5 | 177532832 | 177536682 | 5.05 |
| chr5 | 177536945 | 177544211 | 6.73 |
| chr5 | 177546858 | 177552494 | 9.42 |
| chr5 | 177553332 | 177554396 | 3.7  |
| chr5 | 177557181 | 177558730 | 5.05 |
| chr5 | 177572612 | 177576003 | 6.05 |
| chr5 | 177576255 | 177577062 | 3.03 |
| chr5 | 177577730 | 177582935 | 4.37 |
| chr5 | 177632956 | 177633771 | 3.36 |
| chr5 | 177686270 | 177687077 | 3.03 |
| chr5 | 177695309 | 177696169 | 3.7  |
| chr5 | 177702289 | 177703755 | 5.05 |
| chr5 | 177711043 | 177711876 | 4.04 |
| chr5 | 177796743 | 177797817 | 3.7  |
| chr5 | 178012116 | 178013458 | 8.75 |
| chr5 | 178021562 | 178023140 | 5.05 |
| chr5 | 178052963 | 178055094 | 4.04 |
| chr5 | 178093930 | 178094793 | 4.04 |

|      |           |           |       |
|------|-----------|-----------|-------|
| chr5 | 178095114 | 178096117 | 3.7   |
| chr5 | 178126791 | 178127674 | 3.36  |
| chr5 | 178130836 | 178134353 | 4.71  |
| chr5 | 178135115 | 178150491 | 9.42  |
| chr5 | 178152137 | 178153059 | 3.7   |
| chr5 | 178213575 | 178215072 | 4.37  |
| chr5 | 178265909 | 178266892 | 4.04  |
| chr5 | 178286412 | 178287677 | 4.37  |
| chr5 | 178290465 | 178291439 | 4.37  |
| chr5 | 178295977 | 178299399 | 4.71  |
| chr5 | 178299740 | 178306124 | 5.72  |
| chr5 | 178308705 | 178318016 | 14.13 |
| chr5 | 178318356 | 178322183 | 5.05  |
| chr5 | 178322452 | 178324072 | 4.37  |
| chr5 | 178325330 | 178326765 | 3.7   |
| chr5 | 178327834 | 178328796 | 3.03  |
| chr5 | 178335965 | 178340758 | 5.05  |
| chr5 | 178341139 | 178342553 | 3.36  |
| chr5 | 178343136 | 178346262 | 4.71  |
| chr5 | 178347466 | 178349000 | 5.38  |
| chr5 | 178350256 | 178351245 | 4.04  |
| chr5 | 178352561 | 178369652 | 13.12 |
| chr5 | 178369923 | 178372242 | 4.37  |
| chr5 | 178372681 | 178374377 | 4.71  |
| chr5 | 178377100 | 178378393 | 4.71  |
| chr5 | 178381265 | 178383766 | 4.37  |
| chr5 | 178384736 | 178386757 | 4.04  |
| chr5 | 178388750 | 178390831 | 5.38  |
| chr5 | 178391244 | 178398766 | 8.41  |
| chr5 | 178401366 | 178403396 | 4.04  |
| chr5 | 178403607 | 178409364 | 4.71  |
| chr5 | 178413952 | 178416055 | 4.04  |
| chr5 | 178416457 | 178421236 | 4.71  |
| chr5 | 178422475 | 178425108 | 4.71  |
| chr5 | 178427047 | 178428463 | 4.04  |
| chr5 | 178431841 | 178432786 | 3.36  |
| chr5 | 178434343 | 178435390 | 4.37  |
| chr5 | 178436695 | 178437694 | 3.7   |
| chr5 | 178438375 | 178440264 | 5.72  |
| chr5 | 178441343 | 178442787 | 5.05  |
| chr5 | 178443775 | 178444629 | 4.04  |
| chr5 | 178445617 | 178447096 | 5.05  |
| chr5 | 178447957 | 178449360 | 4.04  |

|      |           |           |       |
|------|-----------|-----------|-------|
| chr5 | 178450275 | 178452315 | 5.38  |
| chr5 | 178453866 | 178466007 | 12.78 |
| chr5 | 178468392 | 178469541 | 4.37  |
| chr5 | 178470032 | 178472311 | 5.05  |
| chr5 | 178472800 | 178474282 | 4.04  |
| chr5 | 178478779 | 178481626 | 4.71  |
| chr5 | 178482205 | 178483482 | 4.04  |
| chr5 | 178486090 | 178488718 | 4.04  |
| chr5 | 178489351 | 178491423 | 3.7   |
| chr5 | 178493139 | 178496689 | 4.37  |
| chr5 | 178497978 | 178499199 | 5.72  |
| chr5 | 178499915 | 178501088 | 3.7   |
| chr5 | 178503290 | 178510807 | 12.11 |
| chr5 | 178511323 | 178517652 | 4.71  |
| chr5 | 178520326 | 178525275 | 5.38  |
| chr5 | 178526135 | 178527713 | 3.7   |
| chr5 | 178535191 | 178536291 | 4.37  |
| chr5 | 178537486 | 178539332 | 4.71  |
| chr5 | 178540142 | 178541979 | 4.71  |
| chr5 | 178549930 | 178551331 | 3.36  |
| chr5 | 178557295 | 178558060 | 5.38  |
| chr5 | 178825461 | 178828619 | 10.09 |
| chr5 | 178876888 | 178879518 | 7.06  |
| chr5 | 178977415 | 178978250 | 3.03  |
| chr5 | 179221542 | 179222571 | 3.36  |
| chr5 | 179247719 | 179249015 | 3.7   |
| chr5 | 179288774 | 179289979 | 4.04  |
| chr5 | 179309251 | 179312145 | 4.71  |
| chr5 | 179409198 | 179410248 | 2.02  |
| chr5 | 179422318 | 179423627 | 4.71  |
| chr5 | 179448608 | 179449452 | 3.36  |
| chr5 | 179635845 | 179636687 | 2.69  |
| chr5 | 179650633 | 179651598 | 4.04  |
| chr5 | 179653551 | 179655109 | 3.7   |
| chr5 | 179673454 | 179694562 | 12.45 |
| chr5 | 179695826 | 179699915 | 5.05  |
| chr5 | 179700532 | 179702903 | 4.71  |
| chr5 | 179703790 | 179705371 | 3.03  |
| chr5 | 179706400 | 179709721 | 6.39  |
| chr5 | 179714055 | 179715254 | 4.37  |
| chr5 | 179920997 | 179921954 | 5.05  |
| chr5 | 180182454 | 180183314 | 4.04  |
| chr5 | 180225869 | 180226775 | 3.36  |

|      |           |           |       |
|------|-----------|-----------|-------|
| chr5 | 180236717 | 180238635 | 5.38  |
| chr5 | 180256210 | 180257564 | 4.04  |
| chr5 | 180272950 | 180281997 | 12.45 |
| chr5 | 180282616 | 180283598 | 3.7   |
| chr5 | 180287590 | 180288891 | 5.05  |
| chr5 | 180300636 | 180301696 | 5.05  |
| chr5 | 180349613 | 180351552 | 4.37  |
| chr5 | 180360425 | 180362417 | 4.04  |
| chr5 | 180448812 | 180450083 | 4.37  |
| chr5 | 180490338 | 180491268 | 2.69  |
| chr5 | 180571702 | 180573187 | 5.05  |
| chr5 | 180599873 | 180600657 | 2.35  |
| chr5 | 180615517 | 180616385 | 3.36  |
| chr5 | 180631417 | 180632432 | 3.36  |
| chr5 | 180648702 | 180650041 | 3.7   |
| chr4 | 27872     | 30148     | 5.72  |
| chr4 | 35633     | 37635     | 5.05  |
| chr4 | 39515     | 70361     | 9.75  |
| chr4 | 71656     | 73000     | 4.04  |
| chr4 | 75538     | 77586     | 4.37  |
| chr4 | 83457     | 91035     | 6.05  |
| chr4 | 92331     | 95312     | 4.71  |
| chr4 | 109013    | 110081    | 4.37  |
| chr4 | 131414    | 132600    | 3.36  |
| chr4 | 141316    | 142548    | 5.72  |
| chr4 | 148037    | 151113    | 4.37  |
| chr4 | 151431    | 157317    | 9.42  |
| chr4 | 157898    | 159314    | 3.36  |
| chr4 | 165583    | 166698    | 3.7   |
| chr4 | 194842    | 198281    | 7.06  |
| chr4 | 237434    | 238814    | 4.04  |
| chr4 | 246170    | 250551    | 5.38  |
| chr4 | 258433    | 259298    | 4.04  |
| chr4 | 262653    | 263785    | 3.36  |
| chr4 | 264066    | 267882    | 7.4   |
| chr4 | 282879    | 284629    | 3.7   |
| chr4 | 295695    | 296575    | 3.7   |
| chr4 | 358595    | 360152    | 4.71  |
| chr4 | 362422    | 363402    | 3.36  |
| chr4 | 365349    | 371497    | 10.09 |
| chr4 | 415735    | 417612    | 4.04  |
| chr4 | 418959    | 422175    | 4.71  |
| chr4 | 424967    | 426398    | 5.38  |

|      |          |          |       |
|------|----------|----------|-------|
| chr4 | 426638   | 428533   | 4.04  |
| chr4 | 430645   | 431672   | 4.71  |
| chr4 | 431920   | 440556   | 10.09 |
| chr4 | 440942   | 441968   | 3.7   |
| chr4 | 442350   | 444637   | 4.37  |
| chr4 | 445738   | 448581   | 3.7   |
| chr4 | 459448   | 460923   | 4.04  |
| chr4 | 481233   | 482207   | 3.36  |
| chr4 | 485628   | 487287   | 8.41  |
| chr4 | 1246432  | 1247946  | 4.37  |
| chr4 | 1486567  | 1487843  | 4.37  |
| chr4 | 1739609  | 1740754  | 5.72  |
| chr4 | 2584635  | 2585919  | 3.7   |
| chr4 | 2982242  | 2984219  | 5.72  |
| chr4 | 3055398  | 3056797  | 5.38  |
| chr4 | 4976076  | 4976917  | 3.7   |
| chr4 | 5490522  | 5491630  | 3.7   |
| chr4 | 6059571  | 6061395  | 15.47 |
| chr4 | 6506069  | 6507451  | 10.09 |
| chr4 | 7087594  | 7089216  | 8.41  |
| chr4 | 7554614  | 7555821  | 4.71  |
| chr4 | 7577720  | 7579133  | 4.71  |
| chr4 | 8065236  | 8066697  | 9.42  |
| chr4 | 8094835  | 8096275  | 6.05  |
| chr4 | 8363428  | 8364837  | 5.38  |
| chr4 | 8902621  | 8903968  | 4.04  |
| chr4 | 8934184  | 8935396  | 7.06  |
| chr4 | 18874590 | 18875906 | 6.05  |
| chr4 | 19438218 | 19439006 | 4.71  |
| chr4 | 23081352 | 23082632 | 5.05  |
| chr4 | 24966406 | 24968842 | 9.42  |
| chr4 | 25224303 | 25227349 | 21.86 |
| chr4 | 26114326 | 26115991 | 6.39  |
| chr4 | 26680381 | 26681607 | 4.71  |
| chr4 | 28015537 | 28017163 | 5.72  |
| chr4 | 28343321 | 28344949 | 6.05  |
| chr4 | 29073045 | 29073981 | 2.02  |
| chr4 | 29862610 | 29863914 | 5.72  |
| chr4 | 30332634 | 30333833 | 5.38  |
| chr4 | 30394759 | 30395721 | 3.7   |
| chr4 | 32826733 | 32828678 | 6.39  |
| chr4 | 38339411 | 38340666 | 4.71  |
| chr4 | 39486054 | 39487297 | 5.72  |

|      |          |          |       |
|------|----------|----------|-------|
| chr4 | 39532100 | 39533212 | 5.05  |
| chr4 | 39640154 | 39640907 | 4.37  |
| chr4 | 41026037 | 41028007 | 12.45 |
| chr4 | 41296063 | 41297350 | 6.73  |
| chr4 | 43824229 | 43825642 | 6.05  |
| chr4 | 48007309 | 48008471 | 6.39  |
| chr4 | 48009386 | 48010974 | 7.06  |
| chr4 | 48155669 | 48157103 | 7.74  |
| chr4 | 48157398 | 48158747 | 4.37  |
| chr4 | 49092934 | 49095113 | 3.36  |
| chr4 | 49104164 | 49105216 | 6.39  |
| chr4 | 49105805 | 49108038 | 4.37  |
| chr4 | 49108906 | 49110994 | 6.73  |
| chr4 | 49111364 | 49112322 | 4.04  |
| chr4 | 49114074 | 49114732 | 5.72  |
| chr4 | 49118221 | 49119471 | 5.38  |
| chr4 | 49120144 | 49123387 | 14.13 |
| chr4 | 49150650 | 49153442 | 10.09 |
| chr4 | 49153767 | 49157694 | 5.38  |
| chr4 | 49513463 | 49515888 | 3.03  |
| chr4 | 49638744 | 49640604 | 6.05  |
| chr4 | 49643536 | 49644496 | 4.37  |
| chr4 | 49644846 | 49647416 | 5.72  |
| chr4 | 49648551 | 49651082 | 5.38  |
| chr4 | 49651933 | 49653108 | 6.05  |
| chr4 | 49653700 | 49654959 | 4.71  |
| chr4 | 49655279 | 49658274 | 6.39  |
| chr4 | 49658964 | 49660169 | 5.05  |
| chr4 | 52676852 | 52677249 | 9.42  |
| chr4 | 52680779 | 52681942 | 4.71  |
| chr4 | 52686515 | 52688196 | 4.71  |
| chr4 | 55106805 | 55107846 | 5.05  |
| chr4 | 55117030 | 55117996 | 4.37  |
| chr4 | 55316127 | 55317018 | 5.05  |
| chr4 | 56150297 | 56151179 | 1.35  |
| chr4 | 57077123 | 57078526 | 5.38  |
| chr4 | 65095920 | 65097282 | 5.05  |
| chr4 | 68263572 | 68267350 | 19.51 |
| chr4 | 68466073 | 68467202 | 5.38  |
| chr4 | 72725858 | 72727298 | 6.39  |
| chr4 | 73902718 | 73903687 | 3.7   |
| chr4 | 77246754 | 77248516 | 5.38  |
| chr4 | 78473527 | 78474997 | 6.05  |

|      |           |           |       |
|------|-----------|-----------|-------|
| chr4 | 78783418  | 78784419  | 4.71  |
| chr4 | 83294743  | 83295842  | 3.36  |
| chr4 | 83821726  | 83822750  | 3.36  |
| chr4 | 84298949  | 84300562  | 8.07  |
| chr4 | 84376448  | 84377560  | 4.04  |
| chr4 | 84885892  | 84887026  | 5.05  |
| chr4 | 85503467  | 85504310  | 4.37  |
| chr4 | 86139684  | 86141002  | 4.37  |
| chr4 | 87573151  | 87574285  | 4.71  |
| chr4 | 87800010  | 87801722  | 5.72  |
| chr4 | 88164163  | 88165360  | 6.05  |
| chr4 | 88612647  | 88614080  | 4.71  |
| chr4 | 88645885  | 88647296  | 7.4   |
| chr4 | 89040490  | 89042316  | 5.72  |
| chr4 | 89273572  | 89275563  | 6.39  |
| chr4 | 91424490  | 91425736  | 4.71  |
| chr4 | 92992286  | 92993550  | 4.71  |
| chr4 | 95347506  | 95348656  | 5.05  |
| chr4 | 96788509  | 96790053  | 10.09 |
| chr4 | 96850122  | 96851433  | 5.72  |
| chr4 | 97368982  | 97371934  | 8.41  |
| chr4 | 98585870  | 98587230  | 4.37  |
| chr4 | 98617506  | 98619720  | 6.73  |
| chr4 | 99114038  | 99115472  | 6.73  |
| chr4 | 99254414  | 99255566  | 5.38  |
| chr4 | 99585733  | 99586837  | 3.7   |
| chr4 | 99737125  | 99738165  | 4.04  |
| chr4 | 99766458  | 99768085  | 8.75  |
| chr4 | 100406814 | 100408093 | 4.71  |
| chr4 | 101151630 | 101152474 | 4.37  |
| chr4 | 101153506 | 101155278 | 5.38  |
| chr4 | 101278275 | 101279604 | 5.38  |
| chr4 | 103382502 | 103383323 | 3.7   |
| chr4 | 103779734 | 103781027 | 4.71  |
| chr4 | 104279941 | 104281972 | 6.05  |
| chr4 | 104872615 | 104873867 | 5.38  |
| chr4 | 105018373 | 105019254 | 3.36  |
| chr4 | 105019916 | 105022111 | 5.72  |
| chr4 | 105783108 | 105784109 | 4.04  |
| chr4 | 106017219 | 106019290 | 4.37  |
| chr4 | 106629333 | 106630505 | 3.7   |
| chr4 | 108510033 | 108511227 | 4.71  |
| chr4 | 108808859 | 108810313 | 5.72  |

|      |           |           |       |
|------|-----------|-----------|-------|
| chr4 | 109645787 | 109647316 | 6.39  |
| chr4 | 112103736 | 112104770 | 4.37  |
| chr4 | 115478965 | 115480518 | 5.05  |
| chr4 | 116935458 | 116938971 | 15.81 |
| chr4 | 116940976 | 116942311 | 6.39  |
| chr4 | 124991488 | 124992791 | 3.03  |
| chr4 | 125382326 | 125383107 | 4.04  |
| chr4 | 125482118 | 125483353 | 4.71  |
| chr4 | 125760367 | 125761920 | 5.05  |
| chr4 | 125797942 | 125799190 | 5.38  |
| chr4 | 125808637 | 125809826 | 4.37  |
| chr4 | 125881712 | 125883993 | 8.07  |
| chr4 | 125927758 | 125928911 | 4.37  |
| chr4 | 129170372 | 129171928 | 8.41  |
| chr4 | 129186224 | 129187590 | 6.73  |
| chr4 | 129977576 | 129978444 | 4.04  |
| chr4 | 129980008 | 129981238 | 4.04  |
| chr4 | 129983228 | 129984515 | 4.71  |
| chr4 | 131187725 | 131188994 | 4.04  |
| chr4 | 131444662 | 131445916 | 7.06  |
| chr4 | 131982322 | 131983151 | 5.05  |
| chr4 | 132604015 | 132605095 | 5.05  |
| chr4 | 133337759 | 133339094 | 7.06  |
| chr4 | 133464649 | 133465691 | 6.05  |
| chr4 | 133604302 | 133606761 | 9.08  |
| chr4 | 133615553 | 133616583 | 4.04  |
| chr4 | 134911178 | 134912468 | 4.71  |
| chr4 | 135468676 | 135469618 | 3.36  |
| chr4 | 135619865 | 135620741 | 3.7   |
| chr4 | 136714801 | 136715725 | 3.36  |
| chr4 | 137664685 | 137665441 | 4.04  |
| chr4 | 140559153 | 140560182 | 5.38  |
| chr4 | 141971591 | 141972591 | 5.38  |
| chr4 | 142401681 | 142402525 | 3.03  |
| chr4 | 143575650 | 143579988 | 7.4   |
| chr4 | 146432656 | 146433955 | 5.05  |
| chr4 | 149221507 | 149222787 | 5.05  |
| chr4 | 150243163 | 150244196 | 3.7   |
| chr4 | 152469435 | 152470449 | 3.7   |
| chr4 | 152867468 | 152868436 | 3.36  |
| chr4 | 152898217 | 152899091 | 3.36  |
| chr4 | 153841324 | 153842782 | 9.08  |
| chr4 | 154609444 | 154610558 | 4.71  |



|      |           |           |       |
|------|-----------|-----------|-------|
| chr4 | 155794703 | 155795937 | 4.04  |
| chr4 | 158449026 | 158450037 | 3.7   |
| chr4 | 160846498 | 160847713 | 5.05  |
| chr4 | 161412437 | 161413883 | 7.06  |
| chr4 | 161718872 | 161720283 | 7.74  |
| chr4 | 162148232 | 162149587 | 5.38  |
| chr4 | 162176434 | 162178287 | 6.73  |
| chr4 | 162212029 | 162213330 | 7.74  |
| chr4 | 163590615 | 163591604 | 4.71  |
| chr4 | 164113354 | 164116514 | 11.44 |
| chr4 | 166393524 | 166395076 | 7.06  |
| chr4 | 168499683 | 168500475 | 5.38  |
| chr4 | 169123985 | 169125438 | 4.71  |
| chr4 | 170253738 | 170254455 | 3.03  |
| chr4 | 170298039 | 170299464 | 4.37  |
| chr4 | 173656711 | 173657523 | 5.38  |
| chr4 | 175532563 | 175533459 | 4.37  |
| chr4 | 175905689 | 175906971 | 5.05  |
| chr4 | 176040066 | 176041475 | 6.39  |
| chr4 | 176133335 | 176138490 | 8.07  |
| chr4 | 176264689 | 176266033 | 5.72  |
| chr4 | 176335180 | 176336299 | 4.37  |
| chr4 | 176419687 | 176421293 | 6.39  |
| chr4 | 178218588 | 178220042 | 8.75  |
| chr4 | 179240716 | 179241841 | 2.02  |
| chr4 | 187372780 | 187373658 | 4.37  |
| chr4 | 190200436 | 190201161 | 4.37  |
| chr4 | 190560122 | 190561168 | 3.7   |
| chr4 | 190570708 | 190571790 | 3.7   |
| chr4 | 190574340 | 190575403 | 3.7   |
| chr4 | 190620495 | 190621510 | 3.03  |
| chr4 | 190625668 | 190626912 | 2.69  |
| chr4 | 190637164 | 190638452 | 4.04  |
| chr4 | 190648919 | 190650031 | 2.69  |
| chr4 | 191027913 | 191030538 | 5.05  |
| chr4 | 191031727 | 191034100 | 5.72  |
| chr3 | 74884     | 75991     | 2.02  |
| chr3 | 265278    | 266100    | 2.69  |
| chr3 | 512079    | 513142    | 4.04  |
| chr3 | 2147852   | 2148983   | 3.36  |
| chr3 | 2155899   | 2156630   | 1.68  |
| chr3 | 2806644   | 2807533   | 3.03  |
| chr3 | 3031282   | 3032090   | 1.68  |

|      |         |         |      |
|------|---------|---------|------|
| chr3 | 3151605 | 3152317 | 3.7  |
| chr3 | 3220769 | 3221689 | 3.36 |
| chr3 | 3487785 | 3488630 | 2.35 |
| chr3 | 3520084 | 3520965 | 2.02 |
| chr3 | 3819676 | 3820632 | 3.7  |
| chr3 | 3868166 | 3869075 | 1.35 |
| chr3 | 4039900 | 4040862 | 3.03 |
| chr3 | 4367797 | 4370339 | 5.38 |
| chr3 | 4472691 | 4474085 | 5.72 |
| chr3 | 4565787 | 4567154 | 5.05 |
| chr3 | 4729584 | 4730946 | 5.38 |
| chr3 | 4732872 | 4733735 | 2.35 |
| chr3 | 4784452 | 4785656 | 4.04 |
| chr3 | 4902734 | 4903430 | 3.7  |
| chr3 | 4946295 | 4947313 | 2.02 |
| chr3 | 5018558 | 5020907 | 4.37 |
| chr3 | 5021331 | 5022768 | 4.04 |
| chr3 | 5028157 | 5029417 | 4.71 |
| chr3 | 5040909 | 5041938 | 4.04 |
| chr3 | 5163558 | 5165244 | 4.37 |
| chr3 | 5294299 | 5295537 | 4.37 |
| chr3 | 5297196 | 5297998 | 2.02 |
| chr3 | 5335861 | 5336688 | 2.02 |
| chr3 | 6088349 | 6089375 | 2.02 |
| chr3 | 7017759 | 7018670 | 3.03 |
| chr3 | 7759849 | 7760713 | 3.03 |
| chr3 | 7999506 | 8000446 | 2.02 |
| chr3 | 8360023 | 8360808 | 3.7  |
| chr3 | 8384503 | 8388045 | 5.72 |
| chr3 | 8485454 | 8487542 | 4.71 |
| chr3 | 8522173 | 8523031 | 4.37 |
| chr3 | 8525810 | 8526818 | 3.36 |
| chr3 | 8609681 | 8610586 | 2.02 |
| chr3 | 8670813 | 8671686 | 3.7  |
| chr3 | 8743280 | 8749169 | 4.37 |
| chr3 | 8751071 | 8752813 | 4.37 |
| chr3 | 8766106 | 8767029 | 2.02 |
| chr3 | 8790183 | 8791060 | 2.69 |
| chr3 | 8984301 | 8985136 | 3.7  |
| chr3 | 9191118 | 9192822 | 4.71 |
| chr3 | 9291194 | 9291964 | 3.7  |
| chr3 | 9315662 | 9317614 | 4.71 |
| chr3 | 9367990 | 9371477 | 7.74 |

|      |          |          |      |
|------|----------|----------|------|
| chr3 | 9404068  | 9405203  | 3.7  |
| chr3 | 9436946  | 9438650  | 3.36 |
| chr3 | 9439552  | 9442072  | 3.7  |
| chr3 | 9532929  | 9534013  | 1.68 |
| chr3 | 9604586  | 9605755  | 3.36 |
| chr3 | 9606492  | 9607571  | 4.37 |
| chr3 | 9624561  | 9626171  | 8.41 |
| chr3 | 9639806  | 9641312  | 4.71 |
| chr3 | 9646137  | 9647547  | 5.38 |
| chr3 | 9654251  | 9655767  | 2.35 |
| chr3 | 9660135  | 9661975  | 7.06 |
| chr3 | 9715246  | 9716152  | 2.02 |
| chr3 | 9768854  | 9769785  | 3.36 |
| chr3 | 9772610  | 9773908  | 3.03 |
| chr3 | 9807685  | 9808673  | 2.69 |
| chr3 | 9850820  | 9852187  | 4.37 |
| chr3 | 9885105  | 9885918  | 4.71 |
| chr3 | 9931707  | 9932948  | 4.37 |
| chr3 | 9957885  | 9958890  | 3.03 |
| chr3 | 9959783  | 9960685  | 1.68 |
| chr3 | 9974204  | 9975580  | 3.03 |
| chr3 | 9993265  | 9994607  | 6.05 |
| chr3 | 9997395  | 9998686  | 3.36 |
| chr3 | 10011496 | 10012585 | 3.36 |
| chr3 | 10018300 | 10019564 | 3.7  |
| chr3 | 10067760 | 10068602 | 3.36 |
| chr3 | 10202590 | 10203508 | 4.04 |
| chr3 | 10210049 | 10213430 | 9.75 |
| chr3 | 10233282 | 10234836 | 4.71 |
| chr3 | 10286616 | 10287859 | 5.72 |
| chr3 | 10289724 | 10290636 | 3.03 |
| chr3 | 10362134 | 10363460 | 5.38 |
| chr3 | 10395703 | 10396790 | 4.37 |
| chr3 | 10464483 | 10465214 | 2.35 |
| chr3 | 10503839 | 10504821 | 2.69 |
| chr3 | 10583871 | 10585176 | 5.38 |
| chr3 | 10589597 | 10590460 | 2.35 |
| chr3 | 10654672 | 10655811 | 3.36 |
| chr3 | 10677986 | 10679279 | 4.71 |
| chr3 | 10686760 | 10687556 | 2.02 |
| chr3 | 10748199 | 10749008 | 2.02 |
| chr3 | 10773763 | 10775763 | 6.39 |
| chr3 | 10853565 | 10854501 | 4.37 |

|      |          |          |      |
|------|----------|----------|------|
| chr3 | 10932247 | 10933864 | 3.7  |
| chr3 | 10947602 | 10951808 | 6.05 |
| chr3 | 10983328 | 10985384 | 3.7  |
| chr3 | 10985805 | 10986606 | 2.35 |
| chr3 | 11004995 | 11006449 | 3.36 |
| chr3 | 11011281 | 11012157 | 2.02 |
| chr3 | 11164507 | 11166208 | 5.38 |
| chr3 | 11285054 | 11286845 | 4.04 |
| chr3 | 11450368 | 11451502 | 3.7  |
| chr3 | 11478605 | 11479685 | 2.02 |
| chr3 | 11509507 | 11510247 | 3.36 |
| chr3 | 11641482 | 11642740 | 4.71 |
| chr3 | 11683229 | 11685218 | 3.36 |
| chr3 | 11703252 | 11704111 | 3.7  |
| chr3 | 11759714 | 11763090 | 4.37 |
| chr3 | 11811481 | 11812867 | 5.72 |
| chr3 | 11832008 | 11832807 | 2.69 |
| chr3 | 11840545 | 11842014 | 3.7  |
| chr3 | 11894857 | 11896880 | 5.05 |
| chr3 | 11943834 | 11944814 | 3.36 |
| chr3 | 11992551 | 11993697 | 4.37 |
| chr3 | 12052640 | 12053576 | 3.36 |
| chr3 | 12153295 | 12154155 | 1.68 |
| chr3 | 12170756 | 12171582 | 1.35 |
| chr3 | 12179441 | 12180717 | 3.03 |
| chr3 | 12228028 | 12228824 | 3.03 |
| chr3 | 12261542 | 12262606 | 3.36 |
| chr3 | 12268747 | 12269607 | 2.35 |
| chr3 | 12289658 | 12292006 | 5.38 |
| chr3 | 12389178 | 12390201 | 3.7  |
| chr3 | 12396822 | 12397770 | 1.68 |
| chr3 | 12446885 | 12448147 | 5.05 |
| chr3 | 12464431 | 12465502 | 3.36 |
| chr3 | 12523889 | 12524660 | 4.37 |
| chr3 | 12586264 | 12587476 | 3.7  |
| chr3 | 12597896 | 12599178 | 6.05 |
| chr3 | 12684091 | 12685059 | 3.36 |
| chr3 | 12705246 | 12706229 | 3.36 |
| chr3 | 12747401 | 12748460 | 3.7  |
| chr3 | 12799903 | 12800842 | 3.36 |
| chr3 | 12854488 | 12855434 | 3.03 |
| chr3 | 12876556 | 12877480 | 2.69 |
| chr3 | 12882238 | 12883882 | 5.38 |

|      |          |          |       |
|------|----------|----------|-------|
| chr3 | 12896081 | 12896817 | 2.35  |
| chr3 | 12906469 | 12907690 | 5.38  |
| chr3 | 13030941 | 13032579 | 4.04  |
| chr3 | 13034916 | 13037150 | 4.04  |
| chr3 | 13061293 | 13062168 | 3.7   |
| chr3 | 13081894 | 13083086 | 4.04  |
| chr3 | 13103860 | 13105215 | 2.35  |
| chr3 | 13141841 | 13142695 | 1.35  |
| chr3 | 13152079 | 13153507 | 4.37  |
| chr3 | 13189533 | 13190341 | 2.69  |
| chr3 | 13196813 | 13197676 | 4.37  |
| chr3 | 13203085 | 13203949 | 1.68  |
| chr3 | 13219380 | 13221682 | 11.44 |
| chr3 | 13228540 | 13229340 | 2.02  |
| chr3 | 13229707 | 13230630 | 3.36  |
| chr3 | 13235800 | 13237973 | 4.04  |
| chr3 | 13270644 | 13271962 | 6.39  |
| chr3 | 13309645 | 13311878 | 4.37  |
| chr3 | 13327428 | 13329199 | 5.72  |
| chr3 | 13450346 | 13451301 | 3.36  |
| chr3 | 13454891 | 13455794 | 3.7   |
| chr3 | 13460425 | 13462263 | 4.04  |
| chr3 | 13508878 | 13509756 | 3.36  |
| chr3 | 13512016 | 13514144 | 3.7   |
| chr3 | 13516649 | 13517563 | 3.7   |
| chr3 | 13520442 | 13521495 | 2.69  |
| chr3 | 13548776 | 13549925 | 4.04  |
| chr3 | 13574603 | 13576246 | 4.71  |
| chr3 | 13580534 | 13581756 | 4.04  |
| chr3 | 13583187 | 13584478 | 5.38  |
| chr3 | 13751889 | 13753403 | 4.04  |
| chr3 | 13778681 | 13780291 | 4.04  |
| chr3 | 13781857 | 13782803 | 3.36  |
| chr3 | 13803861 | 13804898 | 3.36  |
| chr3 | 13810754 | 13811668 | 2.02  |
| chr3 | 13825741 | 13826603 | 3.36  |
| chr3 | 13854074 | 13858927 | 19.51 |
| chr3 | 13891435 | 13892177 | 4.04  |
| chr3 | 13939651 | 13946633 | 6.39  |
| chr3 | 14012820 | 14015552 | 6.39  |
| chr3 | 14065207 | 14069933 | 7.4   |
| chr3 | 14071550 | 14072756 | 4.71  |
| chr3 | 14077259 | 14078962 | 5.38  |

|      |          |          |      |
|------|----------|----------|------|
| chr3 | 14080564 | 14082149 | 3.7  |
| chr3 | 14129730 | 14130969 | 4.04 |
| chr3 | 14137951 | 14139775 | 3.36 |
| chr3 | 14159773 | 14160788 | 3.7  |
| chr3 | 14165465 | 14168462 | 4.04 |
| chr3 | 14177641 | 14178523 | 3.7  |
| chr3 | 14194428 | 14195361 | 4.04 |
| chr3 | 14200373 | 14201166 | 2.69 |
| chr3 | 14201670 | 14202789 | 3.36 |
| chr3 | 14219363 | 14220475 | 3.7  |
| chr3 | 14264596 | 14265789 | 3.7  |
| chr3 | 14270007 | 14270870 | 4.04 |
| chr3 | 14274871 | 14275995 | 3.7  |
| chr3 | 14285151 | 14286133 | 4.04 |
| chr3 | 14306022 | 14307906 | 4.71 |
| chr3 | 14309131 | 14310702 | 4.37 |
| chr3 | 14319716 | 14321011 | 4.37 |
| chr3 | 14327019 | 14327968 | 2.02 |
| chr3 | 14342000 | 14343139 | 4.04 |
| chr3 | 14369726 | 14370536 | 3.7  |
| chr3 | 14392370 | 14393435 | 1.68 |
| chr3 | 14420382 | 14421514 | 3.7  |
| chr3 | 14433628 | 14434483 | 4.04 |
| chr3 | 14453970 | 14455294 | 4.37 |
| chr3 | 14470414 | 14471306 | 2.69 |
| chr3 | 14473172 | 14474551 | 5.38 |
| chr3 | 14549273 | 14550134 | 3.36 |
| chr3 | 14630132 | 14630843 | 3.7  |
| chr3 | 14692685 | 14693937 | 4.71 |
| chr3 | 14781646 | 14782517 | 3.36 |
| chr3 | 14864311 | 14865168 | 4.04 |
| chr3 | 14916491 | 14917272 | 3.7  |
| chr3 | 14921185 | 14922032 | 2.35 |
| chr3 | 14946099 | 14947596 | 5.05 |
| chr3 | 14988473 | 14989399 | 3.36 |
| chr3 | 15106232 | 15107226 | 4.04 |
| chr3 | 15110599 | 15111782 | 2.35 |
| chr3 | 15118769 | 15119575 | 2.02 |
| chr3 | 15140010 | 15141388 | 7.06 |
| chr3 | 15190017 | 15190938 | 3.36 |
| chr3 | 15233849 | 15234929 | 4.37 |
| chr3 | 15236777 | 15238353 | 4.37 |
| chr3 | 15247433 | 15248864 | 4.71 |

|      |          |          |       |
|------|----------|----------|-------|
| chr3 | 15333959 | 15335179 | 5.38  |
| chr3 | 15351520 | 15353261 | 6.73  |
| chr3 | 15366395 | 15368384 | 4.37  |
| chr3 | 15373448 | 15374653 | 3.36  |
| chr3 | 15386163 | 15386966 | 2.69  |
| chr3 | 15431819 | 15432721 | 3.36  |
| chr3 | 15540635 | 15541812 | 3.7   |
| chr3 | 15587903 | 15589419 | 4.04  |
| chr3 | 15642712 | 15643840 | 3.7   |
| chr3 | 15659228 | 15664365 | 6.39  |
| chr3 | 15664882 | 15666466 | 4.04  |
| chr3 | 15674868 | 15676947 | 4.37  |
| chr3 | 15677169 | 15679940 | 3.7   |
| chr3 | 15686830 | 15687798 | 3.7   |
| chr3 | 15697269 | 15700126 | 9.75  |
| chr3 | 15726919 | 15728170 | 5.72  |
| chr3 | 15779149 | 15780998 | 4.71  |
| chr3 | 15880258 | 15882384 | 4.04  |
| chr3 | 15885658 | 15886422 | 4.04  |
| chr3 | 15899990 | 15901128 | 2.69  |
| chr3 | 15901552 | 15902454 | 3.36  |
| chr3 | 15906308 | 15907404 | 4.37  |
| chr3 | 16114795 | 16115510 | 3.36  |
| chr3 | 16122439 | 16125685 | 11.44 |
| chr3 | 16188376 | 16189388 | 3.36  |
| chr3 | 16214882 | 16215638 | 2.35  |
| chr3 | 16372555 | 16373873 | 5.05  |
| chr3 | 16419672 | 16420472 | 4.04  |
| chr3 | 16458143 | 16459416 | 3.7   |
| chr3 | 16545598 | 16546575 | 2.69  |
| chr3 | 16552934 | 16554058 | 3.7   |
| chr3 | 16557745 | 16558638 | 2.69  |
| chr3 | 16567662 | 16568648 | 4.04  |
| chr3 | 16570578 | 16571807 | 1.68  |
| chr3 | 16592030 | 16592905 | 4.71  |
| chr3 | 16655232 | 16656125 | 2.02  |
| chr3 | 16657312 | 16658208 | 4.04  |
| chr3 | 16716200 | 16718317 | 16.15 |
| chr3 | 16779609 | 16780571 | 2.35  |
| chr3 | 16844507 | 16845439 | 3.03  |
| chr3 | 16877821 | 16878600 | 1.68  |
| chr3 | 17085554 | 17086438 | 2.69  |
| chr3 | 17162833 | 17163669 | 2.35  |

|      |          |          |      |
|------|----------|----------|------|
| chr3 | 17171464 | 17173133 | 4.04 |
| chr3 | 17242167 | 17244411 | 4.04 |
| chr3 | 17561126 | 17562034 | 2.02 |
| chr3 | 17631540 | 17632733 | 2.35 |
| chr3 | 17650047 | 17650961 | 2.02 |
| chr3 | 17783225 | 17783998 | 2.69 |
| chr3 | 17909225 | 17910028 | 2.02 |
| chr3 | 18394434 | 18395172 | 2.02 |
| chr3 | 18447726 | 18448606 | 3.7  |
| chr3 | 18466126 | 18466907 | 2.02 |
| chr3 | 18569387 | 18570191 | 2.35 |
| chr3 | 18710663 | 18711838 | 3.7  |
| chr3 | 18777463 | 18778477 | 3.7  |
| chr3 | 18799031 | 18800296 | 5.38 |
| chr3 | 18884415 | 18885803 | 4.04 |
| chr3 | 18971167 | 18971985 | 4.37 |
| chr3 | 19014901 | 19015873 | 4.71 |
| chr3 | 19148382 | 19149253 | 3.7  |
| chr3 | 19187905 | 19189029 | 3.7  |
| chr3 | 19697583 | 19698352 | 2.69 |
| chr3 | 19766072 | 19767210 | 3.7  |
| chr3 | 19844327 | 19845601 | 4.37 |
| chr3 | 19863323 | 19864664 | 3.7  |
| chr3 | 19951593 | 19952495 | 3.7  |
| chr3 | 19988264 | 19989919 | 4.37 |
| chr3 | 20080839 | 20084412 | 4.37 |
| chr3 | 20084778 | 20086383 | 3.7  |
| chr3 | 20095947 | 20096844 | 3.7  |
| chr3 | 20226706 | 20228100 | 5.05 |
| chr3 | 20236422 | 20237305 | 2.02 |
| chr3 | 20416920 | 20417741 | 2.35 |
| chr3 | 20477983 | 20478739 | 1.68 |
| chr3 | 20747170 | 20748021 | 0.67 |
| chr3 | 20930228 | 20930973 | 1.35 |
| chr3 | 21042917 | 21043734 | 1.35 |
| chr3 | 21439606 | 21440497 | 1.35 |
| chr3 | 22208255 | 22209413 | 4.37 |
| chr3 | 22805600 | 22806411 | 3.7  |
| chr3 | 22940533 | 22941569 | 3.36 |
| chr3 | 23059085 | 23060045 | 3.7  |
| chr3 | 23060607 | 23062477 | 4.04 |
| chr3 | 23103827 | 23104864 | 3.03 |
| chr3 | 23136168 | 23137444 | 3.7  |



|      |          |          |      |
|------|----------|----------|------|
| chr3 | 23141953 | 23142983 | 3.7  |
| chr3 | 23361832 | 23363231 | 4.71 |
| chr3 | 23520548 | 23522055 | 5.38 |
| chr3 | 23527417 | 23528614 | 5.38 |
| chr3 | 23715517 | 23716312 | 2.35 |
| chr3 | 23851716 | 23852672 | 4.04 |
| chr3 | 23957878 | 23959462 | 4.71 |
| chr3 | 24357968 | 24358692 | 4.04 |
| chr3 | 24535305 | 24537657 | 4.37 |
| chr3 | 24562201 | 24563066 | 3.03 |
| chr3 | 24583367 | 24584103 | 4.71 |
| chr3 | 25534155 | 25535751 | 5.38 |
| chr3 | 25573775 | 25574670 | 3.7  |
| chr3 | 25575709 | 25576538 | 4.04 |
| chr3 | 25714489 | 25715999 | 5.72 |
| chr3 | 25895572 | 25896719 | 5.05 |
| chr3 | 26128576 | 26129842 | 4.04 |
| chr3 | 26644973 | 26645982 | 3.7  |
| chr3 | 26863327 | 26864921 | 7.74 |
| chr3 | 27277776 | 27278934 | 6.05 |
| chr3 | 27340017 | 27341156 | 5.05 |
| chr3 | 27398885 | 27399521 | 4.37 |
| chr3 | 27524215 | 27525502 | 5.05 |
| chr3 | 27553302 | 27554794 | 4.37 |
| chr3 | 27655461 | 27656894 | 6.73 |
| chr3 | 27732345 | 27733934 | 4.37 |
| chr3 | 28140531 | 28141779 | 3.7  |
| chr3 | 28390042 | 28391902 | 3.7  |
| chr3 | 28791253 | 28792203 | 3.7  |
| chr3 | 30106544 | 30107460 | 3.36 |
| chr3 | 30318395 | 30320421 | 3.7  |
| chr3 | 31082529 | 31083441 | 3.36 |
| chr3 | 31188537 | 31189750 | 6.39 |
| chr3 | 31292746 | 31294236 | 3.36 |
| chr3 | 31477739 | 31479251 | 5.72 |
| chr3 | 31688493 | 31692349 | 5.72 |
| chr3 | 31694321 | 31695295 | 3.36 |
| chr3 | 31996615 | 31998163 | 5.05 |
| chr3 | 32022344 | 32023542 | 3.36 |
| chr3 | 32028955 | 32031101 | 5.05 |
| chr3 | 32031702 | 32034547 | 4.71 |
| chr3 | 32083224 | 32085033 | 4.37 |
| chr3 | 32298965 | 32299868 | 3.36 |

|      |          |          |      |
|------|----------|----------|------|
| chr3 | 32835677 | 32836734 | 2.69 |
| chr3 | 32858039 | 32858881 | 2.69 |
| chr3 | 33006820 | 33007848 | 3.36 |
| chr3 | 33499190 | 33502805 | 11.1 |
| chr3 | 33521353 | 33523527 | 6.39 |
| chr3 | 33740647 | 33741861 | 3.36 |
| chr3 | 34742844 | 34743762 | 3.7  |
| chr3 | 35366162 | 35367243 | 4.04 |
| chr3 | 35433323 | 35434680 | 4.37 |
| chr3 | 37609093 | 37611143 | 4.04 |
| chr3 | 37822945 | 37824444 | 3.7  |
| chr3 | 38368473 | 38369689 | 5.05 |
| chr3 | 38473850 | 38477071 | 7.06 |
| chr3 | 38537487 | 38538378 | 3.7  |
| chr3 | 40391475 | 40392866 | 8.07 |
| chr3 | 40528117 | 40529186 | 4.37 |
| chr3 | 40546988 | 40548203 | 4.37 |
| chr3 | 40565969 | 40567040 | 4.37 |
| chr3 | 40572945 | 40574773 | 5.38 |
| chr3 | 40575196 | 40576255 | 4.37 |
| chr3 | 40577704 | 40579607 | 4.04 |
| chr3 | 40670068 | 40672112 | 6.73 |
| chr3 | 40672526 | 40673658 | 3.7  |
| chr3 | 41170891 | 41171941 | 4.71 |
| chr3 | 42355603 | 42356885 | 5.05 |
| chr3 | 42358161 | 42359372 | 5.38 |
| chr3 | 42954883 | 42957593 | 6.73 |
| chr3 | 42961152 | 42961897 | 4.37 |
| chr3 | 43379399 | 43380622 | 4.71 |
| chr3 | 43394764 | 43396036 | 4.04 |
| chr3 | 44427934 | 44429412 | 4.71 |
| chr3 | 44487842 | 44491228 | 4.37 |
| chr3 | 44501880 | 44503024 | 5.38 |
| chr3 | 44539932 | 44543433 | 6.73 |
| chr3 | 44611897 | 44613265 | 4.37 |
| chr3 | 44635142 | 44637083 | 4.37 |
| chr3 | 44682857 | 44685936 | 5.38 |
| chr3 | 44687343 | 44689137 | 5.05 |
| chr3 | 44699725 | 44703171 | 4.37 |
| chr3 | 44724660 | 44726071 | 3.36 |
| chr3 | 44760775 | 44766238 | 9.75 |
| chr3 | 44772309 | 44773317 | 3.7  |
| chr3 | 44774987 | 44777459 | 6.05 |

|      |          |          |       |
|------|----------|----------|-------|
| chr3 | 44795667 | 44797470 | 4.37  |
| chr3 | 44812016 | 44814693 | 8.41  |
| chr3 | 46072796 | 46074116 | 4.37  |
| chr3 | 46380068 | 46381461 | 3.7   |
| chr3 | 47022920 | 47024048 | 4.37  |
| chr3 | 47204325 | 47205306 | 3.7   |
| chr3 | 47821026 | 47821842 | 4.04  |
| chr3 | 47865690 | 47866700 | 4.37  |
| chr3 | 48398440 | 48399820 | 3.36  |
| chr3 | 48654234 | 48655987 | 10.43 |
| chr3 | 49265278 | 49266583 | 4.37  |
| chr3 | 49269445 | 49271922 | 7.4   |
| chr3 | 50358362 | 50359354 | 1.68  |
| chr3 | 51210924 | 51211698 | 2.35  |
| chr3 | 51572243 | 51573299 | 3.03  |
| chr3 | 58677152 | 58678191 | 5.72  |
| chr3 | 61604794 | 61657035 | 21.53 |
| chr3 | 61658393 | 62047823 | 13.12 |
| chr3 | 62048166 | 62094041 | 7.06  |
| chr3 | 62094749 | 62099927 | 5.38  |
| chr3 | 62100263 | 62101504 | 3.7   |
| chr3 | 62101930 | 62168420 | 8.07  |
| chr3 | 62168668 | 62258022 | 7.4   |
| chr3 | 62258385 | 62290996 | 7.74  |
| chr3 | 62292443 | 62333235 | 20.52 |
| chr3 | 62333609 | 62403013 | 7.4   |
| chr3 | 62403228 | 62581816 | 8.41  |
| chr3 | 62582040 | 62646387 | 6.73  |
| chr3 | 62646653 | 62657557 | 6.73  |
| chr3 | 62658002 | 62692411 | 7.74  |
| chr3 | 62692729 | 62693503 | 3.03  |
| chr3 | 62693945 | 62701100 | 5.38  |
| chr3 | 62701890 | 62706443 | 4.37  |
| chr3 | 62707398 | 62727319 | 6.73  |
| chr3 | 62728494 | 62771362 | 5.72  |
| chr3 | 62772045 | 62777529 | 5.05  |
| chr3 | 62777974 | 62833107 | 6.05  |
| chr3 | 62837982 | 62840774 | 5.38  |
| chr3 | 62841493 | 62843019 | 4.04  |
| chr3 | 62843296 | 62901182 | 11.77 |
| chr3 | 62901907 | 62963043 | 7.4   |
| chr3 | 62963815 | 62982273 | 6.05  |
| chr3 | 62982676 | 62996146 | 5.38  |

|      |          |          |       |
|------|----------|----------|-------|
| chr3 | 62997663 | 63002551 | 5.72  |
| chr3 | 63004291 | 63009167 | 4.71  |
| chr3 | 63009658 | 63023695 | 6.05  |
| chr3 | 63023986 | 63122377 | 13.12 |
| chr3 | 63127814 | 63138962 | 8.75  |
| chr3 | 63141360 | 63169389 | 9.75  |
| chr3 | 63170243 | 63184329 | 7.06  |
| chr3 | 63184537 | 63197190 | 8.07  |
| chr3 | 63203204 | 63239046 | 9.42  |
| chr3 | 63239812 | 63241401 | 4.71  |
| chr3 | 63247574 | 63275524 | 7.06  |
| chr3 | 63276200 | 63299352 | 6.05  |
| chr3 | 63301191 | 63302431 | 3.7   |
| chr3 | 63302696 | 63304890 | 5.05  |
| chr3 | 63305418 | 63320882 | 5.05  |
| chr3 | 63321180 | 63325663 | 5.72  |
| chr3 | 63326281 | 63335400 | 4.71  |
| chr3 | 63335802 | 63360678 | 6.73  |
| chr3 | 63361074 | 63365533 | 5.38  |
| chr3 | 63367108 | 63393616 | 6.05  |
| chr3 | 63393947 | 63403877 | 5.05  |
| chr3 | 63404160 | 63479304 | 6.73  |
| chr3 | 63479736 | 63533017 | 9.08  |
| chr3 | 63533344 | 63549579 | 6.73  |
| chr3 | 63550035 | 63575309 | 9.08  |
| chr3 | 63578055 | 63590095 | 6.05  |
| chr3 | 63590575 | 63605822 | 7.74  |
| chr3 | 63606750 | 63631397 | 8.07  |
| chr3 | 63636850 | 63681359 | 9.08  |
| chr3 | 63685116 | 63719505 | 20.52 |
| chr3 | 63719919 | 63721465 | 5.72  |
| chr3 | 63724482 | 63756683 | 22.2  |
| chr3 | 63757989 | 63766025 | 8.41  |
| chr3 | 63766898 | 63934064 | 12.45 |
| chr3 | 63961891 | 64464118 | 25.9  |
| chr3 | 64466744 | 64528493 | 19.84 |
| chr3 | 64530784 | 64804916 | 15.14 |
| chr3 | 64806306 | 64952597 | 13.79 |
| chr3 | 66024202 | 66025127 | 3.03  |
| chr3 | 66080929 | 66081783 | 4.04  |
| chr3 | 69062488 | 69063295 | 2.35  |
| chr3 | 70761175 | 70762438 | 4.37  |
| chr3 | 72115047 | 72115887 | 3.03  |

|      |          |          |      |
|------|----------|----------|------|
| chr3 | 72124455 | 72125630 | 5.38 |
| chr3 | 72273345 | 72274732 | 8.41 |
| chr3 | 72676890 | 72677941 | 4.37 |
| chr3 | 74029289 | 74030087 | 2.69 |
| chr3 | 76196304 | 76197314 | 1.68 |
| chr3 | 77730544 | 77732275 | 4.37 |
| chr3 | 79100710 | 79102191 | 7.06 |
| chr3 | 79666611 | 79667507 | 4.04 |
| chr3 | 79725753 | 79727261 | 5.05 |
| chr3 | 79895965 | 79897096 | 3.36 |
| chr3 | 80545694 | 80546741 | 3.03 |
| chr3 | 80716768 | 80718161 | 5.72 |
| chr3 | 80753884 | 80755357 | 11.1 |
| chr3 | 81597366 | 81598372 | 3.7  |
| chr3 | 82425538 | 82427079 | 7.4  |
| chr3 | 82863713 | 82864664 | 3.7  |
| chr3 | 84271164 | 84273411 | 5.05 |
| chr3 | 87655342 | 87657675 | 4.37 |
| chr3 | 87664178 | 87665554 | 7.06 |
| chr3 | 87790221 | 87792613 | 4.71 |
| chr3 | 88028449 | 88029272 | 3.7  |
| chr3 | 88844031 | 88845428 | 6.39 |
| chr3 | 89434559 | 89436345 | 4.71 |
| chr3 | 89704904 | 89707044 | 6.39 |
| chr3 | 89820165 | 89821142 | 3.03 |
| chr3 | 89861987 | 89863385 | 4.71 |
| chr3 | 89981977 | 89983284 | 4.71 |
| chr3 | 90111800 | 90112700 | 4.04 |
| chr3 | 90287351 | 90288095 | 3.03 |
| chr3 | 90340156 | 90341558 | 4.37 |
| chr3 | 90407722 | 90409352 | 4.37 |
| chr3 | 90466873 | 90467832 | 5.05 |
| chr3 | 90473219 | 90474465 | 5.05 |
| chr3 | 90477123 | 90479502 | 7.06 |
| chr3 | 90492605 | 90493480 | 4.04 |
| chr3 | 90494524 | 90496287 | 4.04 |
| chr3 | 93515233 | 93518489 | 4.37 |
| chr3 | 94192588 | 94193584 | 4.37 |
| chr3 | 94547789 | 94548981 | 4.04 |
| chr3 | 94580045 | 94584183 | 4.71 |
| chr3 | 94680031 | 94681341 | 4.37 |
| chr3 | 94934856 | 94936401 | 9.75 |
| chr3 | 95045914 | 95046730 | 3.7  |

|      |           |           |      |
|------|-----------|-----------|------|
| chr3 | 95493902  | 95495148  | 6.39 |
| chr3 | 95629629  | 95631249  | 5.05 |
| chr3 | 95768985  | 95771817  | 5.38 |
| chr3 | 95786564  | 95787891  | 5.38 |
| chr3 | 95788500  | 95789573  | 3.7  |
| chr3 | 95887520  | 95888765  | 3.7  |
| chr3 | 95892053  | 95894533  | 9.42 |
| chr3 | 96007068  | 96008149  | 4.71 |
| chr3 | 96291595  | 96292758  | 4.37 |
| chr3 | 96468720  | 96470206  | 4.04 |
| chr3 | 96489471  | 96490912  | 3.36 |
| chr3 | 96647277  | 96649030  | 4.71 |
| chr3 | 96895894  | 96897151  | 4.04 |
| chr3 | 97013503  | 97014413  | 3.03 |
| chr3 | 97222995  | 97224134  | 5.38 |
| chr3 | 97829829  | 97831204  | 5.72 |
| chr3 | 98241001  | 98241852  | 3.03 |
| chr3 | 99523024  | 99525464  | 9.08 |
| chr3 | 99873886  | 99875247  | 4.37 |
| chr3 | 99898168  | 99899622  | 8.07 |
| chr3 | 99945657  | 99946612  | 2.69 |
| chr3 | 99957294  | 99958430  | 2.69 |
| chr3 | 100107376 | 100108723 | 4.04 |
| chr3 | 101292430 | 101293560 | 3.36 |
| chr3 | 101546020 | 101547301 | 4.04 |
| chr3 | 101568230 | 101569732 | 4.04 |
| chr3 | 101734450 | 101735806 | 4.37 |
| chr3 | 101793573 | 101794476 | 4.71 |
| chr3 | 101826185 | 101827171 | 3.7  |
| chr3 | 101870366 | 101872254 | 4.71 |
| chr3 | 101898742 | 101900167 | 4.37 |
| chr3 | 103993564 | 103994884 | 6.73 |
| chr3 | 105329902 | 105331100 | 5.05 |
| chr3 | 105477289 | 105478562 | 4.71 |
| chr3 | 105480729 | 105481829 | 4.37 |
| chr3 | 105969300 | 105970501 | 4.04 |
| chr3 | 106264116 | 106265714 | 6.05 |
| chr3 | 106439308 | 106440595 | 6.05 |
| chr3 | 107127758 | 107129018 | 3.03 |
| chr3 | 107646021 | 107646768 | 4.71 |
| chr3 | 107719028 | 107720773 | 4.37 |
| chr3 | 107809840 | 107810932 | 3.7  |
| chr3 | 107987594 | 107988400 | 3.7  |

|      |           |           |      |
|------|-----------|-----------|------|
| chr3 | 108307038 | 108310246 | 4.71 |
| chr3 | 109569377 | 109570220 | 1.35 |
| chr3 | 110667339 | 110668866 | 5.72 |
| chr3 | 110790530 | 110791361 | 2.35 |
| chr3 | 111273848 | 111274942 | 4.37 |
| chr3 | 111380360 | 111381687 | 5.72 |
| chr3 | 111973349 | 111974104 | 1.68 |
| chr3 | 112230755 | 112232000 | 6.05 |
| chr3 | 112722807 | 112723605 | 1.68 |
| chr3 | 112906824 | 112908041 | 4.04 |
| chr3 | 113143936 | 113144840 | 3.36 |
| chr3 | 113254896 | 113256468 | 5.38 |
| chr3 | 113259828 | 113261310 | 6.39 |
| chr3 | 113363590 | 113364843 | 5.05 |
| chr3 | 113978602 | 113979816 | 5.05 |
| chr3 | 117914554 | 117915707 | 2.69 |
| chr3 | 118051003 | 118052417 | 5.72 |
| chr3 | 118088278 | 118089570 | 5.38 |
| chr3 | 118311422 | 118312681 | 6.39 |
| chr3 | 118560914 | 118562275 | 6.39 |
| chr3 | 119005251 | 119006313 | 3.36 |
| chr3 | 119145504 | 119148485 | 7.74 |
| chr3 | 119757656 | 119760434 | 8.75 |
| chr3 | 119763238 | 119764059 | 3.7  |
| chr3 | 119873270 | 119874893 | 5.38 |
| chr3 | 119976376 | 119977641 | 4.71 |
| chr3 | 120056946 | 120058902 | 3.7  |
| chr3 | 120228054 | 120229470 | 5.05 |
| chr3 | 121111906 | 121112674 | 4.04 |
| chr3 | 121424120 | 121424975 | 1.68 |
| chr3 | 121660962 | 121661845 | 3.7  |
| chr3 | 121740252 | 121741218 | 2.69 |
| chr3 | 121754965 | 121756585 | 5.72 |
| chr3 | 122101540 | 122102311 | 3.7  |
| chr3 | 122162142 | 122163477 | 5.72 |
| chr3 | 122300045 | 122301853 | 5.05 |
| chr3 | 122623831 | 122624775 | 4.04 |
| chr3 | 122947497 | 122948840 | 8.07 |
| chr3 | 123038690 | 123039600 | 1.68 |
| chr3 | 123128459 | 123129321 | 4.37 |
| chr3 | 123305860 | 123307010 | 4.04 |
| chr3 | 123308951 | 123310369 | 6.05 |
| chr3 | 123314716 | 123315518 | 2.02 |

|      |           |           |       |
|------|-----------|-----------|-------|
| chr3 | 123545412 | 123546704 | 4.71  |
| chr3 | 123610550 | 123611811 | 4.71  |
| chr3 | 124274258 | 124275233 | 1.68  |
| chr3 | 124305448 | 124306530 | 3.7   |
| chr3 | 124311268 | 124312453 | 3.36  |
| chr3 | 124532910 | 124534278 | 5.38  |
| chr3 | 124605853 | 124607294 | 4.04  |
| chr3 | 124809138 | 124810312 | 4.37  |
| chr3 | 125138239 | 125139141 | 3.7   |
| chr3 | 125355582 | 125356843 | 4.37  |
| chr3 | 125746374 | 125747908 | 7.06  |
| chr3 | 125756241 | 125757286 | 3.7   |
| chr3 | 125805674 | 125808914 | 9.75  |
| chr3 | 125821383 | 125822186 | 2.02  |
| chr3 | 125912951 | 125914595 | 11.77 |
| chr3 | 126048890 | 126049963 | 4.04  |
| chr3 | 126378702 | 126379630 | 3.7   |
| chr3 | 126491160 | 126491975 | 3.7   |
| chr3 | 126692914 | 126694399 | 4.04  |
| chr3 | 126830648 | 126831536 | 4.04  |
| chr3 | 126831818 | 126833181 | 4.04  |
| chr3 | 126968431 | 126969693 | 5.38  |
| chr3 | 127074917 | 127076327 | 4.37  |
| chr3 | 127308532 | 127309980 | 3.36  |
| chr3 | 127735061 | 127736065 | 5.38  |
| chr3 | 127943623 | 127944444 | 2.02  |
| chr3 | 128399616 | 128400445 | 2.69  |
| chr3 | 128428374 | 128429568 | 3.7   |
| chr3 | 128494692 | 128495671 | 4.04  |
| chr3 | 128572436 | 128574260 | 10.76 |
| chr3 | 128575220 | 128576475 | 4.37  |
| chr3 | 128576679 | 128580058 | 22.54 |
| chr3 | 128732257 | 128733231 | 1.35  |
| chr3 | 128771894 | 128772850 | 3.7   |
| chr3 | 128879366 | 128880728 | 4.71  |
| chr3 | 128901955 | 128903194 | 4.37  |
| chr3 | 129095967 | 129097454 | 6.73  |
| chr3 | 129098457 | 129099547 | 4.37  |
| chr3 | 129204246 | 129205577 | 5.72  |
| chr3 | 129224958 | 129226242 | 4.37  |
| chr3 | 129381539 | 129382497 | 5.72  |
| chr3 | 129471320 | 129472366 | 3.7   |
| chr3 | 129621443 | 129628231 | 7.4   |



|      |           |           |       |
|------|-----------|-----------|-------|
| chr3 | 129634636 | 129637406 | 18.16 |
| chr3 | 129647933 | 129648984 | 5.72  |
| chr3 | 130271013 | 130272500 | 4.37  |
| chr3 | 130326132 | 130327149 | 4.04  |
| chr3 | 131221162 | 131222522 | 5.72  |
| chr3 | 131996358 | 131997110 | 4.71  |
| chr3 | 132035837 | 132037182 | 4.37  |
| chr3 | 132085777 | 132086700 | 3.03  |
| chr3 | 133204982 | 133206519 | 5.05  |
| chr3 | 133233203 | 133234311 | 4.04  |
| chr3 | 133510234 | 133512705 | 13.45 |
| chr3 | 133760873 | 133766235 | 7.4   |
| chr3 | 134076316 | 134077357 | 5.05  |
| chr3 | 134356243 | 134357069 | 1.68  |
| chr3 | 135802669 | 135803384 | 4.71  |
| chr3 | 135914947 | 135916408 | 3.03  |
| chr3 | 135968824 | 135969853 | 3.7   |
| chr3 | 136038382 | 136039500 | 4.37  |
| chr3 | 136040270 | 136042639 | 4.04  |
| chr3 | 136174614 | 136175849 | 4.37  |
| chr3 | 136372088 | 136374272 | 4.37  |
| chr3 | 136414347 | 136415651 | 4.37  |
| chr3 | 136601912 | 136602866 | 4.37  |
| chr3 | 136610100 | 136611462 | 5.05  |
| chr3 | 136612244 | 136613776 | 4.71  |
| chr3 | 136622458 | 136623967 | 4.04  |
| chr3 | 137822042 | 137822881 | 1.35  |
| chr3 | 138204916 | 138207184 | 4.37  |
| chr3 | 138264270 | 138266645 | 4.37  |
| chr3 | 138364056 | 138365638 | 4.04  |
| chr3 | 138393724 | 138395058 | 4.71  |
| chr3 | 138485850 | 138488415 | 10.43 |
| chr3 | 138552401 | 138554046 | 4.37  |
| chr3 | 138633655 | 138634664 | 3.7   |
| chr3 | 139467764 | 139469028 | 4.37  |
| chr3 | 139574370 | 139576367 | 4.04  |
| chr3 | 139634844 | 139636355 | 3.7   |
| chr3 | 139653547 | 139654293 | 2.35  |
| chr3 | 140833732 | 140834637 | 2.69  |
| chr3 | 141030043 | 141030863 | 4.37  |
| chr3 | 141378413 | 141379303 | 3.36  |
| chr3 | 141387906 | 141388895 | 3.7   |
| chr3 | 142006085 | 142008083 | 9.75  |

|      |           |           |      |
|------|-----------|-----------|------|
| chr3 | 142314518 | 142315322 | 3.7  |
| chr3 | 142815491 | 142816279 | 4.04 |
| chr3 | 143355611 | 143356849 | 1.35 |
| chr3 | 143789445 | 143791156 | 3.7  |
| chr3 | 143817849 | 143819168 | 3.7  |
| chr3 | 144059371 | 144060420 | 2.02 |
| chr3 | 144383978 | 144385282 | 7.74 |
| chr3 | 144552784 | 144554188 | 4.04 |
| chr3 | 145074864 | 145075939 | 5.05 |
| chr3 | 145452909 | 145453876 | 3.7  |
| chr3 | 145831432 | 145832352 | 6.39 |
| chr3 | 145878760 | 145879695 | 4.37 |
| chr3 | 146077205 | 146079309 | 4.04 |
| chr3 | 146300163 | 146300980 | 5.38 |
| chr3 | 146751731 | 146752599 | 4.04 |
| chr3 | 147581992 | 147585215 | 6.05 |
| chr3 | 147594599 | 147595861 | 5.05 |
| chr3 | 147599241 | 147600273 | 3.7  |
| chr3 | 148538213 | 148539359 | 3.7  |
| chr3 | 148611154 | 148612019 | 3.36 |
| chr3 | 148823136 | 148825285 | 4.04 |
| chr3 | 148846854 | 148847925 | 3.7  |
| chr3 | 149017429 | 149018763 | 6.05 |
| chr3 | 149103655 | 149105204 | 5.38 |
| chr3 | 149107131 | 149108144 | 3.36 |
| chr3 | 149118802 | 149120332 | 4.71 |
| chr3 | 149169291 | 149170592 | 5.38 |
| chr3 | 149191369 | 149192225 | 4.04 |
| chr3 | 149375682 | 149377060 | 4.37 |
| chr3 | 149415752 | 149417107 | 3.36 |
| chr3 | 149432541 | 149433727 | 1.68 |
| chr3 | 149548410 | 149553163 | 9.42 |
| chr3 | 149554105 | 149556604 | 5.38 |
| chr3 | 149650426 | 149651515 | 4.04 |
| chr3 | 149687368 | 149688421 | 3.36 |
| chr3 | 149811944 | 149813349 | 3.7  |
| chr3 | 149954894 | 149957055 | 4.37 |
| chr3 | 149986172 | 149987095 | 3.7  |
| chr3 | 149997883 | 149998598 | 4.04 |
| chr3 | 150062351 | 150063465 | 5.38 |
| chr3 | 150095275 | 150096233 | 2.69 |
| chr3 | 150106849 | 150107750 | 1.68 |
| chr3 | 150128276 | 150129657 | 4.71 |

|      |           |           |      |
|------|-----------|-----------|------|
| chr3 | 150159909 | 150161172 | 3.7  |
| chr3 | 150171396 | 150172325 | 3.36 |
| chr3 | 150215280 | 150217373 | 4.37 |
| chr3 | 150218297 | 150219491 | 4.04 |
| chr3 | 150320733 | 150322120 | 7.06 |
| chr3 | 150378027 | 150378834 | 1.68 |
| chr3 | 150392926 | 150394197 | 4.04 |
| chr3 | 150408697 | 150411714 | 7.4  |
| chr3 | 150480360 | 150481704 | 3.36 |
| chr3 | 150804216 | 150805209 | 3.7  |
| chr3 | 151027319 | 151028142 | 1.68 |
| chr3 | 151418278 | 151420005 | 3.7  |
| chr3 | 151507357 | 151508400 | 5.05 |
| chr3 | 151509736 | 151510781 | 4.04 |
| chr3 | 151526841 | 151527728 | 4.37 |
| chr3 | 151581054 | 151581844 | 2.35 |
| chr3 | 151752812 | 151756879 | 6.05 |
| chr3 | 151985935 | 151987020 | 3.7  |
| chr3 | 152027420 | 152028217 | 1.68 |
| chr3 | 152504203 | 152505554 | 6.73 |
| chr3 | 152878600 | 152879634 | 4.37 |
| chr3 | 153195295 | 153196243 | 3.7  |
| chr3 | 153487545 | 153488471 | 2.35 |
| chr3 | 154081328 | 154082369 | 3.7  |
| chr3 | 154483046 | 154484723 | 4.37 |
| chr3 | 154637667 | 154639152 | 3.7  |
| chr3 | 154768891 | 154771674 | 8.41 |
| chr3 | 154965925 | 154967349 | 3.36 |
| chr3 | 155082580 | 155083846 | 4.71 |
| chr3 | 155145424 | 155147731 | 4.04 |
| chr3 | 155184099 | 155184889 | 4.04 |
| chr3 | 155185910 | 155186763 | 3.7  |
| chr3 | 155333908 | 155336251 | 6.05 |
| chr3 | 155435404 | 155436406 | 3.7  |
| chr3 | 155445238 | 155446416 | 5.05 |
| chr3 | 155448419 | 155449228 | 4.04 |
| chr3 | 155460979 | 155463200 | 5.05 |
| chr3 | 155487003 | 155488611 | 5.05 |
| chr3 | 155499474 | 155501077 | 8.07 |
| chr3 | 155523023 | 155524476 | 3.7  |
| chr3 | 155571442 | 155573099 | 7.74 |
| chr3 | 155588054 | 155590081 | 6.39 |
| chr3 | 156265577 | 156266434 | 1.68 |

|      |           |           |       |
|------|-----------|-----------|-------|
| chr3 | 156346674 | 156347567 | 3.03  |
| chr3 | 156464205 | 156465793 | 4.04  |
| chr3 | 156529990 | 156531776 | 4.37  |
| chr3 | 156591166 | 156592561 | 3.7   |
| chr3 | 156596382 | 156598125 | 10.76 |
| chr3 | 156601577 | 156602887 | 4.37  |
| chr3 | 156877301 | 156879023 | 4.37  |
| chr3 | 156892386 | 156893670 | 4.37  |
| chr3 | 156905052 | 156907076 | 3.7   |
| chr3 | 157502843 | 157503662 | 3.36  |
| chr3 | 157546173 | 157547242 | 3.7   |
| chr3 | 157751294 | 157752103 | 3.36  |
| chr3 | 157827206 | 157828561 | 6.05  |
| chr3 | 157918278 | 157919670 | 6.05  |
| chr3 | 157984231 | 157986097 | 6.73  |
| chr3 | 158335053 | 158337051 | 10.43 |
| chr3 | 158442740 | 158444227 | 3.03  |
| chr3 | 158742535 | 158743517 | 3.7   |
| chr3 | 159368801 | 159369605 | 1.35  |
| chr3 | 159651092 | 159652902 | 11.1  |
| chr3 | 160166910 | 160168085 | 3.7   |
| chr3 | 160177851 | 160178660 | 1.35  |
| chr3 | 160187448 | 160188896 | 8.41  |
| chr3 | 160701290 | 160702611 | 5.72  |
| chr3 | 160740202 | 160741719 | 6.39  |
| chr3 | 160748159 | 160750335 | 4.71  |
| chr3 | 160781805 | 160783007 | 5.05  |
| chr3 | 160787299 | 160789100 | 4.04  |
| chr3 | 160799610 | 160800878 | 3.7   |
| chr3 | 160821877 | 160823957 | 4.04  |
| chr3 | 160824574 | 160825787 | 3.7   |
| chr3 | 160831778 | 160833089 | 4.04  |
| chr3 | 160833368 | 160834427 | 3.36  |
| chr3 | 160836306 | 160838187 | 7.06  |
| chr3 | 160841587 | 160842809 | 3.7   |
| chr3 | 160877715 | 160878737 | 3.36  |
| chr3 | 160880301 | 160881970 | 4.37  |
| chr3 | 160899328 | 160901157 | 4.71  |
| chr3 | 160915415 | 160916356 | 3.7   |
| chr3 | 160938464 | 160939893 | 3.7   |
| chr3 | 160940270 | 160941589 | 3.7   |
| chr3 | 160943961 | 160944849 | 4.04  |
| chr3 | 160978502 | 160979388 | 3.36  |

|      |           |           |      |
|------|-----------|-----------|------|
| chr3 | 160982826 | 160983936 | 5.05 |
| chr3 | 160985209 | 160989693 | 4.71 |
| chr3 | 160992331 | 160993029 | 3.36 |
| chr3 | 160993428 | 160996669 | 5.72 |
| chr3 | 160996885 | 160998208 | 4.71 |
| chr3 | 160999269 | 161000805 | 4.71 |
| chr3 | 161007006 | 161009963 | 4.71 |
| chr3 | 161013132 | 161019324 | 5.38 |
| chr3 | 161021433 | 161023021 | 3.36 |
| chr3 | 161024096 | 161028287 | 7.06 |
| chr3 | 161032146 | 161033643 | 4.04 |
| chr3 | 161038401 | 161040165 | 4.37 |
| chr3 | 161046409 | 161048528 | 3.7  |
| chr3 | 161054278 | 161055799 | 5.38 |
| chr3 | 161056443 | 161058467 | 4.04 |
| chr3 | 161069599 | 161070515 | 2.02 |
| chr3 | 161070808 | 161071989 | 4.04 |
| chr3 | 161088234 | 161091062 | 5.05 |
| chr3 | 161100010 | 161101122 | 4.71 |
| chr3 | 161106491 | 161108832 | 4.37 |
| chr3 | 161109726 | 161110676 | 3.7  |
| chr3 | 161113473 | 161115159 | 3.03 |
| chr3 | 161129348 | 161130882 | 4.37 |
| chr3 | 161133241 | 161134745 | 3.03 |
| chr3 | 161144134 | 161145463 | 4.37 |
| chr3 | 161150531 | 161152212 | 4.04 |
| chr3 | 161155112 | 161156409 | 5.05 |
| chr3 | 161161406 | 161162617 | 5.05 |
| chr3 | 161169165 | 161170167 | 4.04 |
| chr3 | 161174467 | 161175318 | 5.05 |
| chr3 | 161180167 | 161181718 | 3.7  |
| chr3 | 161277122 | 161278648 | 3.36 |
| chr3 | 161307763 | 161309250 | 3.36 |
| chr3 | 161317606 | 161318878 | 4.04 |
| chr3 | 161319197 | 161320113 | 4.37 |
| chr3 | 161329811 | 161330891 | 3.03 |
| chr3 | 161353045 | 161354219 | 3.03 |
| chr3 | 161359325 | 161360434 | 4.04 |
| chr3 | 161385641 | 161386600 | 4.04 |
| chr3 | 161388548 | 161389461 | 3.36 |
| chr3 | 161391794 | 161392788 | 4.04 |
| chr3 | 161394035 | 161396669 | 4.37 |
| chr3 | 161601677 | 161603664 | 7.74 |

|      |           |           |       |
|------|-----------|-----------|-------|
| chr3 | 161643043 | 161644439 | 5.72  |
| chr3 | 161717134 | 161718488 | 5.38  |
| chr3 | 161776629 | 161777923 | 5.38  |
| chr3 | 161890173 | 161891336 | 4.37  |
| chr3 | 162051950 | 162053366 | 4.04  |
| chr3 | 162364686 | 162366150 | 5.72  |
| chr3 | 162482989 | 162484730 | 6.05  |
| chr3 | 162790271 | 162792157 | 6.05  |
| chr3 | 162843084 | 162845968 | 5.05  |
| chr3 | 163052750 | 163054134 | 5.38  |
| chr3 | 163594495 | 163597134 | 10.76 |
| chr3 | 163860678 | 163866713 | 8.07  |
| chr3 | 163972074 | 163973117 | 4.04  |
| chr3 | 163996455 | 163997797 | 3.7   |
| chr3 | 164024670 | 164026191 | 3.7   |
| chr3 | 164053538 | 164054493 | 5.05  |
| chr3 | 164185336 | 164187517 | 9.42  |
| chr3 | 164237673 | 164240724 | 6.73  |
| chr3 | 164241390 | 164242281 | 4.37  |
| chr3 | 164629269 | 164631354 | 4.37  |
| chr3 | 164963258 | 164964704 | 3.7   |
| chr3 | 165084151 | 165085454 | 4.04  |
| chr3 | 165437543 | 165438968 | 5.72  |
| chr3 | 165689493 | 165690406 | 3.36  |
| chr3 | 166142514 | 166143713 | 3.7   |
| chr3 | 166247589 | 166248512 | 3.7   |
| chr3 | 166249006 | 166250487 | 7.4   |
| chr3 | 166481768 | 166483766 | 9.75  |
| chr3 | 166582443 | 166584894 | 6.39  |
| chr3 | 166633229 | 166634254 | 4.37  |
| chr3 | 166634776 | 166636657 | 3.7   |
| chr3 | 166685949 | 166687003 | 4.04  |
| chr3 | 166872819 | 166873991 | 4.37  |
| chr3 | 166894488 | 166895610 | 4.71  |
| chr3 | 167812049 | 167812822 | 3.36  |
| chr3 | 168588095 | 168589150 | 5.05  |
| chr3 | 168595067 | 168595928 | 4.37  |
| chr3 | 168613352 | 168615106 | 5.38  |
| chr3 | 168649440 | 168651177 | 4.37  |
| chr3 | 168988486 | 168989525 | 1.35  |
| chr3 | 169375162 | 169376130 | 3.7   |
| chr3 | 169378997 | 169380803 | 5.05  |
| chr3 | 169480139 | 169481652 | 3.36  |

|      |           |           |       |
|------|-----------|-----------|-------|
| chr3 | 169490447 | 169491872 | 4.04  |
| chr3 | 169532401 | 169533275 | 4.37  |
| chr3 | 169618656 | 169620272 | 7.06  |
| chr3 | 169679022 | 169680383 | 2.02  |
| chr3 | 169683920 | 169684977 | 4.71  |
| chr3 | 169794495 | 169795484 | 1.68  |
| chr3 | 169817717 | 169818856 | 2.02  |
| chr3 | 169879955 | 169880879 | 3.36  |
| chr3 | 169898842 | 169899902 | 4.04  |
| chr3 | 170025240 | 170026356 | 4.04  |
| chr3 | 170046107 | 170047085 | 4.71  |
| chr3 | 170054952 | 170057421 | 10.43 |
| chr3 | 170074031 | 170075405 | 4.04  |
| chr3 | 170210289 | 170211566 | 4.37  |
| chr3 | 170626148 | 170626882 | 3.03  |
| chr3 | 170636331 | 170637332 | 4.71  |
| chr3 | 170880291 | 170881775 | 2.35  |
| chr3 | 171229292 | 171230259 | 3.03  |
| chr3 | 171376054 | 171376911 | 1.35  |
| chr3 | 171541710 | 171542504 | 2.35  |
| chr3 | 171547513 | 171548651 | 3.03  |
| chr3 | 171571411 | 171573672 | 8.75  |
| chr3 | 171757118 | 171759119 | 5.38  |
| chr3 | 171959700 | 171961153 | 4.37  |
| chr3 | 173146905 | 173147712 | 3.03  |
| chr3 | 174453585 | 174454999 | 4.71  |
| chr3 | 174576443 | 174578030 | 3.03  |
| chr3 | 174691148 | 174692061 | 3.7   |
| chr3 | 174766640 | 174768071 | 4.37  |
| chr3 | 174768585 | 174769697 | 3.36  |
| chr3 | 174774076 | 174775468 | 3.7   |
| chr3 | 174783519 | 174785541 | 4.37  |
| chr3 | 174821333 | 174822346 | 4.37  |
| chr3 | 174838599 | 174839462 | 4.04  |
| chr3 | 174839873 | 174840761 | 3.36  |
| chr3 | 174852871 | 174854556 | 3.7   |
| chr3 | 174913433 | 174914202 | 3.7   |
| chr3 | 174930263 | 174931390 | 3.7   |
| chr3 | 174976538 | 174977589 | 4.71  |
| chr3 | 174986752 | 174988578 | 6.05  |
| chr3 | 174995968 | 174996982 | 3.03  |
| chr3 | 175030283 | 175031521 | 4.04  |
| chr3 | 175037593 | 175038591 | 5.05  |

|      |           |           |       |
|------|-----------|-----------|-------|
| chr3 | 175042342 | 175043264 | 3.03  |
| chr3 | 175048270 | 175049393 | 4.37  |
| chr3 | 175050102 | 175050921 | 4.04  |
| chr3 | 175054281 | 175055369 | 4.04  |
| chr3 | 175080138 | 175081593 | 4.37  |
| chr3 | 175095626 | 175096800 | 4.04  |
| chr3 | 175240323 | 175241389 | 4.37  |
| chr3 | 175259808 | 175261340 | 4.37  |
| chr3 | 175312086 | 175313023 | 4.04  |
| chr3 | 175532759 | 175533704 | 3.7   |
| chr3 | 175536086 | 175538151 | 6.05  |
| chr3 | 175636212 | 175637796 | 4.04  |
| chr3 | 175653680 | 175654600 | 3.36  |
| chr3 | 175657757 | 175659587 | 3.7   |
| chr3 | 175663336 | 175664221 | 3.36  |
| chr3 | 175984128 | 175985240 | 2.69  |
| chr3 | 176113292 | 176114809 | 3.36  |
| chr3 | 176156850 | 176158213 | 4.37  |
| chr3 | 176229589 | 176233564 | 14.46 |
| chr3 | 176573417 | 176574620 | 4.04  |
| chr3 | 176634295 | 176635380 | 4.04  |
| chr3 | 176723145 | 176724617 | 4.37  |
| chr3 | 177075714 | 177076800 | 3.7   |
| chr3 | 177175286 | 177176242 | 3.7   |
| chr3 | 177243859 | 177244718 | 3.36  |
| chr3 | 177615699 | 177618349 | 4.71  |
| chr3 | 177997268 | 177998274 | 3.7   |
| chr3 | 178704469 | 178706621 | 9.42  |
| chr3 | 179210585 | 179211894 | 2.35  |
| chr3 | 179213139 | 179214139 | 5.05  |
| chr3 | 179945935 | 179948962 | 10.43 |
| chr3 | 180606420 | 180607687 | 5.05  |
| chr3 | 181568525 | 181569675 | 3.03  |
| chr3 | 181953754 | 181954454 | 1.35  |
| chr3 | 182314078 | 182316339 | 4.04  |
| chr3 | 182456516 | 182457697 | 4.37  |
| chr3 | 182511419 | 182512265 | 2.35  |
| chr3 | 182919542 | 182922511 | 4.71  |
| chr3 | 182959727 | 182961065 | 3.7   |
| chr3 | 183012726 | 183013694 | 4.04  |
| chr3 | 183315558 | 183316288 | 3.7   |
| chr3 | 183370110 | 183373638 | 19.17 |
| chr3 | 183728491 | 183729944 | 5.05  |



|      |           |           |      |
|------|-----------|-----------|------|
| chr3 | 183851648 | 183853727 | 4.04 |
| chr3 | 183965885 | 183967464 | 3.7  |
| chr3 | 184032845 | 184033834 | 2.69 |
| chr3 | 184418194 | 184419260 | 4.37 |
| chr3 | 184778124 | 184779609 | 4.04 |
| chr3 | 184869524 | 184870896 | 5.72 |
| chr3 | 184954142 | 184955469 | 4.04 |
| chr3 | 184974574 | 184976013 | 4.71 |
| chr3 | 185216445 | 185217723 | 4.37 |
| chr3 | 186924512 | 186926633 | 4.71 |
| chr3 | 187191025 | 187192514 | 6.39 |
| chr3 | 187192891 | 187194181 | 5.72 |
| chr3 | 187526706 | 187527522 | 3.36 |
| chr3 | 188097478 | 188098343 | 4.04 |
| chr3 | 188731683 | 188734718 | 5.05 |
| chr3 | 189041987 | 189043224 | 3.7  |
| chr3 | 189541017 | 189541870 | 1.68 |
| chr3 | 190009370 | 190010339 | 4.37 |
| chr3 | 191216867 | 191218150 | 4.71 |
| chr3 | 191255582 | 191256538 | 3.7  |
| chr3 | 191368807 | 191369734 | 3.7  |
| chr3 | 191423291 | 191424385 | 3.7  |
| chr3 | 191831912 | 191833002 | 3.36 |
| chr3 | 191991057 | 191991759 | 3.36 |
| chr3 | 192231425 | 192232347 | 3.03 |
| chr3 | 192315054 | 192316446 | 3.7  |
| chr3 | 192321237 | 192322205 | 4.04 |
| chr3 | 192444689 | 192445481 | 2.69 |
| chr3 | 192633898 | 192635149 | 3.7  |
| chr3 | 193216769 | 193217898 | 3.7  |
| chr3 | 193241589 | 193242512 | 4.04 |
| chr3 | 193253158 | 193254865 | 3.36 |
| chr3 | 193310393 | 193311651 | 4.71 |
| chr3 | 193429063 | 193433910 | 9.42 |
| chr3 | 193467716 | 193468971 | 5.72 |
| chr3 | 193473213 | 193475372 | 6.39 |
| chr3 | 193509085 | 193510268 | 3.7  |
| chr3 | 193522870 | 193523928 | 4.71 |
| chr3 | 193534227 | 193535522 | 3.36 |
| chr3 | 193603386 | 193604317 | 3.36 |
| chr3 | 193622080 | 193623083 | 3.7  |
| chr3 | 193624788 | 193627178 | 5.05 |
| chr3 | 193627936 | 193628939 | 3.7  |

|      |           |           |       |
|------|-----------|-----------|-------|
| chr3 | 193672033 | 193673528 | 5.72  |
| chr3 | 193720510 | 193721881 | 7.06  |
| chr3 | 193768264 | 193769635 | 4.37  |
| chr3 | 193807005 | 193808211 | 5.05  |
| chr3 | 193852135 | 193854085 | 6.73  |
| chr3 | 193876297 | 193877472 | 4.04  |
| chr3 | 193988210 | 193989619 | 3.36  |
| chr3 | 194010446 | 194011296 | 3.7   |
| chr3 | 194036383 | 194037296 | 4.37  |
| chr3 | 194053366 | 194054853 | 4.04  |
| chr3 | 194254632 | 194255848 | 4.04  |
| chr3 | 194352594 | 194354461 | 4.37  |
| chr3 | 194392753 | 194393617 | 4.37  |
| chr3 | 194403534 | 194404596 | 3.7   |
| chr3 | 194604515 | 194605362 | 4.04  |
| chr3 | 194652974 | 194654269 | 4.71  |
| chr3 | 194655277 | 194656550 | 5.72  |
| chr3 | 195039427 | 195040578 | 4.37  |
| chr3 | 195331612 | 195336822 | 12.78 |
| chr3 | 195425230 | 195426139 | 3.36  |
| chr3 | 195426533 | 195427354 | 3.7   |
| chr3 | 195427739 | 195428980 | 5.72  |
| chr3 | 195434989 | 195437218 | 4.37  |
| chr3 | 195447327 | 195448379 | 4.37  |
| chr3 | 195634058 | 195636256 | 4.37  |
| chr3 | 195636511 | 195637533 | 3.7   |
| chr3 | 195637785 | 195638959 | 4.37  |
| chr3 | 195808160 | 195809032 | 4.04  |
| chr3 | 195876247 | 195877954 | 9.42  |
| chr3 | 196014089 | 196015462 | 4.37  |
| chr3 | 196190247 | 196191165 | 3.7   |
| chr3 | 196229855 | 196231269 | 6.05  |
| chr3 | 196232745 | 196234532 | 8.07  |
| chr3 | 196244264 | 196249645 | 24.89 |
| chr3 | 196275858 | 196276674 | 4.04  |
| chr3 | 196387230 | 196388106 | 5.05  |
| chr3 | 196466362 | 196467690 | 4.04  |
| chr3 | 196480994 | 196482193 | 4.71  |
| chr3 | 196483541 | 196484522 | 4.71  |
| chr3 | 196519583 | 196522194 | 5.05  |
| chr3 | 196574914 | 196576827 | 11.1  |
| chr3 | 196625074 | 196626259 | 8.41  |
| chr3 | 196645337 | 196646270 | 3.36  |

|      |           |           |       |
|------|-----------|-----------|-------|
| chr3 | 196668696 | 196669920 | 4.04  |
| chr3 | 196968353 | 196972550 | 9.75  |
| chr3 | 196974603 | 196976704 | 6.39  |
| chr3 | 197086578 | 197087941 | 6.39  |
| chr3 | 197183143 | 197184123 | 3.7   |
| chr3 | 197266154 | 197267261 | 4.37  |
| chr3 | 197289221 | 197293546 | 5.72  |
| chr3 | 197341701 | 197344230 | 13.79 |
| chr3 | 197476306 | 197478021 | 3.7   |
| chr3 | 197684536 | 197685666 | 4.04  |
| chr3 | 197693506 | 197695198 | 7.06  |
| chr2 | 57673     | 58993     | 4.04  |
| chr2 | 182109    | 183459    | 5.72  |
| chr2 | 682786    | 685330    | 4.37  |
| chr2 | 1351975   | 1353806   | 9.75  |
| chr2 | 1628915   | 1629775   | 4.04  |
| chr2 | 2086720   | 2087631   | 5.05  |
| chr2 | 3399493   | 3400958   | 6.73  |
| chr2 | 3955636   | 3956900   | 4.71  |
| chr2 | 4216121   | 4217265   | 4.04  |
| chr2 | 6983806   | 6987071   | 14.8  |
| chr2 | 7903328   | 7904200   | 3.36  |
| chr2 | 7940965   | 7942264   | 4.71  |
| chr2 | 8671408   | 8672671   | 5.05  |
| chr2 | 8786360   | 8788254   | 4.37  |
| chr2 | 8814350   | 8815381   | 4.37  |
| chr2 | 9092996   | 9094198   | 4.71  |
| chr2 | 9739329   | 9740535   | 5.05  |
| chr2 | 9998159   | 9998973   | 4.37  |
| chr2 | 10442077  | 10443075  | 4.71  |
| chr2 | 11178200  | 11179181  | 4.04  |
| chr2 | 11605944  | 11607008  | 4.71  |
| chr2 | 11802858  | 11803925  | 5.05  |
| chr2 | 11904404  | 11905396  | 4.04  |
| chr2 | 12363455  | 12364441  | 3.7   |
| chr2 | 14585230  | 14586723  | 5.72  |
| chr2 | 14597799  | 14598928  | 4.04  |
| chr2 | 14774010  | 14775124  | 5.38  |
| chr2 | 15700884  | 15701852  | 4.04  |
| chr2 | 15731482  | 15732706  | 5.05  |
| chr2 | 16037267  | 16038764  | 4.04  |
| chr2 | 16095332  | 16096198  | 4.37  |
| chr2 | 16202920  | 16204423  | 6.39  |

|      |          |          |      |
|------|----------|----------|------|
| chr2 | 16218860 | 16219801 | 3.36 |
| chr2 | 16532314 | 16533390 | 4.04 |
| chr2 | 17259526 | 17261460 | 7.74 |
| chr2 | 18180627 | 18181995 | 5.72 |
| chr2 | 18204372 | 18205384 | 3.7  |
| chr2 | 19172314 | 19173458 | 3.7  |
| chr2 | 19340086 | 19341201 | 5.05 |
| chr2 | 19349100 | 19351471 | 9.75 |
| chr2 | 19512836 | 19513584 | 3.03 |
| chr2 | 20430908 | 20431954 | 3.7  |
| chr2 | 20551003 | 20552183 | 4.71 |
| chr2 | 20608274 | 20609831 | 7.74 |
| chr2 | 20695730 | 20696808 | 4.37 |
| chr2 | 22804776 | 22806068 | 4.04 |
| chr2 | 24149346 | 24150712 | 3.7  |
| chr2 | 24329302 | 24330227 | 3.36 |
| chr2 | 24788680 | 24789703 | 4.04 |
| chr2 | 25117069 | 25118407 | 6.73 |
| chr2 | 25894459 | 25895403 | 4.37 |
| chr2 | 27273454 | 27274637 | 4.04 |
| chr2 | 27579227 | 27580101 | 4.04 |
| chr2 | 27664701 | 27665942 | 4.04 |
| chr2 | 27886155 | 27887132 | 3.36 |
| chr2 | 28660183 | 28661040 | 4.37 |
| chr2 | 29302323 | 29303922 | 5.05 |
| chr2 | 30924093 | 30925550 | 7.4  |
| chr2 | 31051772 | 31052863 | 4.37 |
| chr2 | 31212600 | 31213622 | 4.71 |
| chr2 | 31360968 | 31361778 | 4.04 |
| chr2 | 31641829 | 31642992 | 3.36 |
| chr2 | 31675691 | 31677708 | 8.75 |
| chr2 | 31897849 | 31898865 | 4.71 |
| chr2 | 31917699 | 31920247 | 11.1 |
| chr2 | 32390157 | 32391368 | 4.37 |
| chr2 | 33490968 | 33492362 | 5.05 |
| chr2 | 33700306 | 33701486 | 4.71 |
| chr2 | 33711023 | 33712216 | 3.7  |
| chr2 | 33840179 | 33842158 | 5.72 |
| chr2 | 33843333 | 33844201 | 3.36 |
| chr2 | 33889581 | 33890971 | 7.4  |
| chr2 | 34434935 | 34436237 | 5.05 |
| chr2 | 35744956 | 35746233 | 5.38 |
| chr2 | 35809924 | 35812907 | 8.07 |

|      |          |          |      |
|------|----------|----------|------|
| chr2 | 35823667 | 35825096 | 7.06 |
| chr2 | 36702161 | 36703288 | 3.7  |
| chr2 | 36852128 | 36853269 | 5.38 |
| chr2 | 36958745 | 36959874 | 4.37 |
| chr2 | 37391314 | 37392144 | 4.04 |
| chr2 | 38303492 | 38304612 | 3.7  |
| chr2 | 38331519 | 38332588 | 3.03 |
| chr2 | 38353307 | 38356110 | 5.72 |
| chr2 | 38375167 | 38376447 | 5.38 |
| chr2 | 38639075 | 38640455 | 8.07 |
| chr2 | 38707257 | 38708644 | 4.71 |
| chr2 | 39586034 | 39589413 | 6.05 |
| chr2 | 39748555 | 39749920 | 6.05 |
| chr2 | 39789333 | 39791640 | 6.73 |
| chr2 | 40247746 | 40248919 | 5.38 |
| chr2 | 41211678 | 41212494 | 4.04 |
| chr2 | 41721351 | 41723638 | 9.42 |
| chr2 | 41727549 | 41729148 | 8.07 |
| chr2 | 42002711 | 42003832 | 3.36 |
| chr2 | 42640880 | 42642112 | 5.38 |
| chr2 | 42789598 | 42790383 | 3.36 |
| chr2 | 42960826 | 42962262 | 6.39 |
| chr2 | 43004614 | 43005923 | 5.72 |
| chr2 | 43007029 | 43007843 | 3.36 |
| chr2 | 43357636 | 43358993 | 5.38 |
| chr2 | 43453710 | 43455536 | 4.04 |
| chr2 | 43886435 | 43887280 | 5.05 |
| chr2 | 44536999 | 44538460 | 6.73 |
| chr2 | 45118541 | 45119718 | 4.37 |
| chr2 | 45767927 | 45769637 | 5.72 |
| chr2 | 46163323 | 46164265 | 4.04 |
| chr2 | 46165551 | 46166576 | 4.37 |
| chr2 | 46635648 | 46637106 | 4.04 |
| chr2 | 47403181 | 47404416 | 4.71 |
| chr2 | 47797574 | 47799178 | 4.04 |
| chr2 | 48011301 | 48012290 | 3.7  |
| chr2 | 48574304 | 48575905 | 6.39 |
| chr2 | 48615338 | 48616428 | 4.37 |
| chr2 | 52357134 | 52358117 | 4.04 |
| chr2 | 52554325 | 52555340 | 1.68 |
| chr2 | 53780902 | 53782831 | 4.71 |
| chr2 | 53935573 | 53937260 | 8.07 |
| chr2 | 54285106 | 54286261 | 5.38 |

|      |          |          |      |
|------|----------|----------|------|
| chr2 | 54347510 | 54348970 | 4.37 |
| chr2 | 55347529 | 55348387 | 1.01 |
| chr2 | 55787678 | 55788967 | 6.39 |
| chr2 | 55843972 | 55844957 | 4.04 |
| chr2 | 56899338 | 56901005 | 5.38 |
| chr2 | 57444087 | 57445459 | 5.38 |
| chr2 | 57478253 | 57479752 | 7.06 |
| chr2 | 58161397 | 58162220 | 3.03 |
| chr2 | 61243711 | 61244891 | 3.7  |
| chr2 | 61403773 | 61404647 | 3.03 |
| chr2 | 61764905 | 61766242 | 4.71 |
| chr2 | 62299025 | 62300338 | 5.72 |
| chr2 | 62503498 | 62507163 | 8.75 |
| chr2 | 62511695 | 62512879 | 3.7  |
| chr2 | 62958384 | 62959256 | 3.7  |
| chr2 | 63434327 | 63435632 | 5.38 |
| chr2 | 63526037 | 63526858 | 3.36 |
| chr2 | 63527617 | 63530007 | 7.4  |
| chr2 | 63747444 | 63749150 | 6.39 |
| chr2 | 64129908 | 64130930 | 4.04 |
| chr2 | 64245954 | 64247041 | 3.7  |
| chr2 | 64248501 | 64249258 | 4.37 |
| chr2 | 64876328 | 64877138 | 3.36 |
| chr2 | 65271016 | 65272041 | 3.7  |
| chr2 | 65662718 | 65663602 | 3.36 |
| chr2 | 65701618 | 65703475 | 4.71 |
| chr2 | 65714149 | 65715418 | 4.04 |
| chr2 | 66380694 | 66382046 | 4.71 |
| chr2 | 66626897 | 66627756 | 4.71 |
| chr2 | 67624573 | 67625418 | 3.36 |
| chr2 | 67767853 | 67768816 | 4.71 |
| chr2 | 67809745 | 67811309 | 5.38 |
| chr2 | 67873591 | 67874855 | 5.38 |
| chr2 | 67927531 | 67928301 | 3.36 |
| chr2 | 68207288 | 68208676 | 5.38 |
| chr2 | 68332477 | 68333482 | 4.04 |
| chr2 | 69486286 | 69487975 | 5.05 |
| chr2 | 70313152 | 70314373 | 4.04 |
| chr2 | 70367926 | 70370149 | 3.7  |
| chr2 | 71357253 | 71358229 | 4.04 |
| chr2 | 71544664 | 71545839 | 4.37 |
| chr2 | 71688902 | 71690626 | 4.04 |
| chr2 | 71951583 | 71952738 | 4.37 |

|      |          |          |       |
|------|----------|----------|-------|
| chr2 | 71973942 | 71974774 | 4.71  |
| chr2 | 72270754 | 72272038 | 4.04  |
| chr2 | 72612765 | 72614391 | 9.08  |
| chr2 | 72988272 | 72990307 | 5.38  |
| chr2 | 73629764 | 73630870 | 4.04  |
| chr2 | 73757370 | 73758619 | 5.38  |
| chr2 | 73865035 | 73866316 | 5.05  |
| chr2 | 74236948 | 74238115 | 4.37  |
| chr2 | 74346891 | 74348235 | 5.05  |
| chr2 | 74681441 | 74682676 | 4.37  |
| chr2 | 75124638 | 75125903 | 6.05  |
| chr2 | 75380665 | 75381500 | 4.04  |
| chr2 | 75776039 | 75777394 | 5.05  |
| chr2 | 76082215 | 76083165 | 4.04  |
| chr2 | 78061046 | 78062562 | 4.37  |
| chr2 | 78256113 | 78257358 | 6.73  |
| chr2 | 82357661 | 82358698 | 3.7   |
| chr2 | 84693133 | 84694735 | 4.71  |
| chr2 | 85028992 | 85030031 | 5.05  |
| chr2 | 85134041 | 85135122 | 4.04  |
| chr2 | 85553909 | 85555557 | 3.7   |
| chr2 | 85606701 | 85608097 | 9.08  |
| chr2 | 85750571 | 85752071 | 3.7   |
| chr2 | 85969263 | 85970200 | 4.04  |
| chr2 | 86070178 | 86071447 | 3.7   |
| chr2 | 86168690 | 86173147 | 5.72  |
| chr2 | 86181428 | 86182768 | 4.37  |
| chr2 | 86187934 | 86189026 | 4.04  |
| chr2 | 86497828 | 86499964 | 6.39  |
| chr2 | 86667468 | 86668607 | 5.38  |
| chr2 | 86726633 | 86728752 | 4.04  |
| chr2 | 86747048 | 86747922 | 4.04  |
| chr2 | 86773352 | 86775010 | 4.04  |
| chr2 | 86783134 | 86784562 | 4.37  |
| chr2 | 86876559 | 86877529 | 3.7   |
| chr2 | 86888300 | 86890629 | 7.74  |
| chr2 | 86921677 | 86922775 | 4.04  |
| chr2 | 87023432 | 87024730 | 5.05  |
| chr2 | 87623476 | 87624342 | 8.41  |
| chr2 | 88447569 | 88449366 | 5.05  |
| chr2 | 88568457 | 88569399 | 4.04  |
| chr2 | 88981764 | 88984541 | 12.11 |
| chr2 | 88990066 | 88991868 | 4.04  |

|      |          |          |       |
|------|----------|----------|-------|
| chr2 | 89832132 | 89835804 | 5.38  |
| chr2 | 89836368 | 89837993 | 4.04  |
| chr2 | 89839698 | 89842519 | 4.37  |
| chr2 | 89843220 | 89847087 | 7.4   |
| chr2 | 89848546 | 89850202 | 3.36  |
| chr2 | 89850569 | 89853588 | 4.71  |
| chr2 | 89856817 | 89861371 | 7.4   |
| chr2 | 89862038 | 89865905 | 5.05  |
| chr2 | 89866143 | 89881400 | 14.13 |
| chr2 | 90372165 | 90373409 | 6.05  |
| chr2 | 90477839 | 90478576 | 3.7   |
| chr2 | 90479546 | 90480568 | 4.71  |
| chr2 | 90481491 | 90482956 | 7.4   |
| chr2 | 90484752 | 90485762 | 8.07  |
| chr2 | 91599230 | 91599620 | 7.74  |
| chr2 | 91759297 | 91764806 | 5.72  |
| chr2 | 91765100 | 91773366 | 6.73  |
| chr2 | 91773591 | 91774490 | 4.71  |
| chr2 | 91774959 | 91777314 | 5.38  |
| chr2 | 91777711 | 91780194 | 6.05  |
| chr2 | 91780490 | 91784388 | 5.05  |
| chr2 | 91784618 | 91822016 | 8.07  |
| chr2 | 92267028 | 92268283 | 8.75  |
| chr2 | 92268622 | 92270548 | 20.52 |
| chr2 | 92272220 | 92274125 | 8.75  |
| chr2 | 92274347 | 92276973 | 5.72  |
| chr2 | 92280263 | 92282060 | 13.79 |
| chr2 | 92287456 | 92288429 | 5.05  |
| chr2 | 92289659 | 92293678 | 13.12 |
| chr2 | 92295697 | 92298168 | 12.11 |
| chr2 | 92305041 | 92310014 | 14.13 |
| chr2 | 92312522 | 92313103 | 5.05  |
| chr2 | 92315435 | 92322594 | 26.57 |
| chr2 | 92322814 | 92325229 | 16.82 |
| chr2 | 95794934 | 95795704 | 3.36  |
| chr2 | 95800068 | 95801373 | 4.04  |
| chr2 | 95802375 | 95805286 | 5.38  |
| chr2 | 95809223 | 95811514 | 4.37  |
| chr2 | 95811990 | 95819172 | 13.79 |
| chr2 | 95821769 | 95823256 | 3.7   |
| chr2 | 95830873 | 95831944 | 4.37  |
| chr2 | 95846704 | 95848144 | 5.05  |
| chr2 | 95876161 | 95886709 | 12.11 |



|      |           |           |      |
|------|-----------|-----------|------|
| chr2 | 96486046  | 96486892  | 3.36 |
| chr2 | 96492408  | 96494414  | 5.38 |
| chr2 | 96777884  | 96778577  | 3.7  |
| chr2 | 97042936  | 97044083  | 4.04 |
| chr2 | 97096092  | 97097488  | 4.04 |
| chr2 | 97303535  | 97304705  | 5.05 |
| chr2 | 97481648  | 97482605  | 3.7  |
| chr2 | 97498009  | 97498865  | 4.71 |
| chr2 | 97534373  | 97535513  | 3.7  |
| chr2 | 97537998  | 97539390  | 3.7  |
| chr2 | 97548613  | 97550281  | 3.36 |
| chr2 | 97553161  | 97555060  | 6.05 |
| chr2 | 97556716  | 97558091  | 6.05 |
| chr2 | 97562982  | 97564154  | 4.37 |
| chr2 | 97581415  | 97583286  | 5.05 |
| chr2 | 97596311  | 97597194  | 3.36 |
| chr2 | 97598948  | 97599688  | 4.37 |
| chr2 | 98501949  | 98503153  | 4.37 |
| chr2 | 98604058  | 98604960  | 3.36 |
| chr2 | 98937208  | 98938256  | 3.36 |
| chr2 | 99112980  | 99113837  | 3.36 |
| chr2 | 99398649  | 99399639  | 5.05 |
| chr2 | 99409387  | 99410423  | 4.04 |
| chr2 | 99582632  | 99583833  | 4.37 |
| chr2 | 99797157  | 99798268  | 3.7  |
| chr2 | 99821598  | 99822882  | 4.71 |
| chr2 | 99886237  | 99888174  | 6.39 |
| chr2 | 100413473 | 100414818 | 5.72 |
| chr2 | 100878764 | 100879922 | 5.05 |
| chr2 | 100933651 | 100934899 | 4.71 |
| chr2 | 100937015 | 100938252 | 4.04 |
| chr2 | 100976130 | 100977750 | 3.7  |
| chr2 | 100978254 | 100979646 | 6.73 |
| chr2 | 100984844 | 100985743 | 4.04 |
| chr2 | 101072511 | 101074079 | 7.74 |
| chr2 | 101074661 | 101076243 | 6.05 |
| chr2 | 101080534 | 101081400 | 3.36 |
| chr2 | 101222712 | 101223587 | 3.36 |
| chr2 | 101484214 | 101485485 | 4.37 |
| chr2 | 101736387 | 101737534 | 6.73 |
| chr2 | 101790276 | 101790993 | 4.37 |
| chr2 | 101868198 | 101869979 | 4.04 |
| chr2 | 101941354 | 101942556 | 4.71 |

|      |           |           |       |
|------|-----------|-----------|-------|
| chr2 | 102542994 | 102544301 | 5.05  |
| chr2 | 102759573 | 102760755 | 3.7   |
| chr2 | 102761598 | 102766119 | 5.72  |
| chr2 | 102832907 | 102834296 | 5.05  |
| chr2 | 103028230 | 103029802 | 3.7   |
| chr2 | 103121447 | 103122345 | 4.04  |
| chr2 | 103165414 | 103166261 | 2.69  |
| chr2 | 103416328 | 103418581 | 8.75  |
| chr2 | 104857156 | 104858331 | 4.71  |
| chr2 | 105341287 | 105342161 | 3.36  |
| chr2 | 106621232 | 106622129 | 4.37  |
| chr2 | 106851144 | 106854036 | 5.05  |
| chr2 | 108243945 | 108245280 | 2.35  |
| chr2 | 108627079 | 108628135 | 5.05  |
| chr2 | 109014702 | 109016814 | 7.74  |
| chr2 | 109710132 | 109711435 | 6.05  |
| chr2 | 110911768 | 110913225 | 4.04  |
| chr2 | 112866385 | 112867505 | 3.36  |
| chr2 | 112961505 | 112962946 | 7.74  |
| chr2 | 113032617 | 113033475 | 4.04  |
| chr2 | 113616996 | 113620128 | 8.75  |
| chr2 | 113623222 | 113624661 | 6.05  |
| chr2 | 113757667 | 113758921 | 5.38  |
| chr2 | 113811993 | 113814457 | 6.39  |
| chr2 | 117559441 | 117560810 | 4.04  |
| chr2 | 119501906 | 119502947 | 3.7   |
| chr2 | 120178548 | 120179784 | 6.73  |
| chr2 | 120289505 | 120292992 | 11.77 |
| chr2 | 120516704 | 120518227 | 3.7   |
| chr2 | 120549989 | 120552996 | 5.38  |
| chr2 | 120609261 | 120610565 | 6.73  |
| chr2 | 121114864 | 121115597 | 3.03  |
| chr2 | 121406528 | 121408544 | 13.45 |
| chr2 | 121796381 | 121797234 | 4.37  |
| chr2 | 122406714 | 122407823 | 4.37  |
| chr2 | 122439576 | 122441360 | 8.75  |
| chr2 | 127300176 | 127301452 | 5.72  |
| chr2 | 127995618 | 127996437 | 3.7   |
| chr2 | 128127025 | 128128371 | 4.37  |
| chr2 | 128164891 | 128165787 | 3.36  |
| chr2 | 128447736 | 128449094 | 6.73  |
| chr2 | 128577252 | 128578825 | 8.41  |
| chr2 | 128585495 | 128587185 | 4.71  |

|      |           |           |       |
|------|-----------|-----------|-------|
| chr2 | 128789055 | 128790609 | 4.37  |
| chr2 | 128793722 | 128795767 | 9.42  |
| chr2 | 128800081 | 128801473 | 6.05  |
| chr2 | 129031509 | 129032402 | 3.36  |
| chr2 | 129223778 | 129225084 | 5.38  |
| chr2 | 129225625 | 129227628 | 5.05  |
| chr2 | 131129377 | 131130454 | 4.71  |
| chr2 | 131712417 | 131713151 | 3.03  |
| chr2 | 132305559 | 132306619 | 4.37  |
| chr2 | 132986467 | 132987819 | 7.06  |
| chr2 | 132997835 | 132999273 | 6.39  |
| chr2 | 133001490 | 133002559 | 3.7   |
| chr2 | 133005171 | 133010002 | 6.05  |
| chr2 | 133016559 | 133017497 | 3.7   |
| chr2 | 133104244 | 133105713 | 4.04  |
| chr2 | 133173461 | 133174667 | 3.7   |
| chr2 | 133223401 | 133226234 | 4.71  |
| chr2 | 133299718 | 133302693 | 5.05  |
| chr2 | 134151633 | 134152556 | 4.04  |
| chr2 | 134261727 | 134262481 | 3.36  |
| chr2 | 134832842 | 134834048 | 4.71  |
| chr2 | 134877165 | 134878032 | 3.36  |
| chr2 | 135675233 | 135676358 | 4.04  |
| chr2 | 135828385 | 135831293 | 10.76 |
| chr2 | 135901517 | 135902463 | 3.7   |
| chr2 | 136062855 | 136063673 | 3.7   |
| chr2 | 136105045 | 136106058 | 4.04  |
| chr2 | 136209800 | 136211496 | 6.05  |
| chr2 | 136255618 | 136257145 | 7.74  |
| chr2 | 136513728 | 136515053 | 4.71  |
| chr2 | 136875522 | 136876507 | 4.37  |
| chr2 | 136938484 | 136939443 | 4.04  |
| chr2 | 138140168 | 138141954 | 5.38  |
| chr2 | 138544261 | 138545681 | 4.71  |
| chr2 | 138547899 | 138549108 | 4.37  |
| chr2 | 138921794 | 138923270 | 4.71  |
| chr2 | 139183255 | 139184603 | 8.41  |
| chr2 | 139742879 | 139744242 | 5.38  |
| chr2 | 140255872 | 140257099 | 3.7   |
| chr2 | 140400116 | 140401639 | 5.05  |
| chr2 | 140530890 | 140531934 | 4.04  |
| chr2 | 140730109 | 140731565 | 3.36  |
| chr2 | 141626113 | 141627470 | 5.38  |

|      |           |           |       |
|------|-----------|-----------|-------|
| chr2 | 141631091 | 141632297 | 5.05  |
| chr2 | 141633088 | 141634428 | 6.05  |
| chr2 | 142351276 | 142352364 | 3.7   |
| chr2 | 143067507 | 143069111 | 5.72  |
| chr2 | 143155191 | 143156971 | 6.73  |
| chr2 | 143702070 | 143702913 | 4.37  |
| chr2 | 143833057 | 143833980 | 4.71  |
| chr2 | 145010880 | 145012231 | 5.05  |
| chr2 | 145090005 | 145090902 | 2.69  |
| chr2 | 147477927 | 147479194 | 5.05  |
| chr2 | 149010453 | 149012436 | 7.06  |
| chr2 | 149016724 | 149017934 | 4.71  |
| chr2 | 149172026 | 149174446 | 5.38  |
| chr2 | 149360399 | 149361288 | 4.04  |
| chr2 | 150443741 | 150444550 | 2.69  |
| chr2 | 151002785 | 151004351 | 7.06  |
| chr2 | 151132734 | 151134143 | 6.05  |
| chr2 | 151159162 | 151160571 | 6.05  |
| chr2 | 151757183 | 151758151 | 4.04  |
| chr2 | 151974648 | 151975566 | 4.37  |
| chr2 | 152103541 | 152104661 | 6.05  |
| chr2 | 152798875 | 152799531 | 4.37  |
| chr2 | 152915062 | 152916021 | 3.7   |
| chr2 | 153825910 | 153827752 | 5.72  |
| chr2 | 154085265 | 154086563 | 3.7   |
| chr2 | 154444250 | 154445662 | 5.72  |
| chr2 | 154622482 | 154623779 | 2.69  |
| chr2 | 155402261 | 155403928 | 4.71  |
| chr2 | 155790461 | 155791947 | 4.71  |
| chr2 | 155958277 | 155959503 | 4.71  |
| chr2 | 156260640 | 156262297 | 6.73  |
| chr2 | 157038259 | 157039425 | 4.04  |
| chr2 | 157093010 | 157094019 | 3.7   |
| chr2 | 157239423 | 157240575 | 4.37  |
| chr2 | 157782708 | 157783603 | 4.04  |
| chr2 | 157814882 | 157816758 | 7.06  |
| chr2 | 158578300 | 158580397 | 9.08  |
| chr2 | 159579750 | 159581082 | 4.04  |
| chr2 | 159871319 | 159872240 | 4.04  |
| chr2 | 159952275 | 159953284 | 3.7   |
| chr2 | 160924531 | 160926241 | 5.38  |
| chr2 | 160943147 | 160947380 | 16.15 |
| chr2 | 161061807 | 161062770 | 4.04  |

|      |           |           |      |
|------|-----------|-----------|------|
| chr2 | 161495545 | 161496970 | 5.38 |
| chr2 | 161634460 | 161635939 | 5.05 |
| chr2 | 162004813 | 162007201 | 4.04 |
| chr2 | 162134617 | 162138837 | 7.4  |
| chr2 | 162218847 | 162220300 | 3.7  |
| chr2 | 162337749 | 162339057 | 5.05 |
| chr2 | 162442741 | 162443559 | 3.36 |
| chr2 | 162692708 | 162695077 | 6.73 |
| chr2 | 162913194 | 162914323 | 3.7  |
| chr2 | 163346280 | 163347606 | 3.36 |
| chr2 | 163350920 | 163352223 | 4.04 |
| chr2 | 163644694 | 163646192 | 5.38 |
| chr2 | 163937496 | 163938512 | 4.37 |
| chr2 | 164129389 | 164130296 | 3.7  |
| chr2 | 164748363 | 164749399 | 4.37 |
| chr2 | 165370645 | 165371993 | 6.05 |
| chr2 | 165506252 | 165507163 | 3.7  |
| chr2 | 165697748 | 165698685 | 3.7  |
| chr2 | 168828814 | 168830677 | 4.04 |
| chr2 | 170440021 | 170441754 | 4.37 |
| chr2 | 171044406 | 171045678 | 3.7  |
| chr2 | 171114086 | 171114907 | 3.7  |
| chr2 | 171766330 | 171768623 | 6.05 |
| chr2 | 171769139 | 171770851 | 4.37 |
| chr2 | 171773155 | 171776222 | 7.06 |
| chr2 | 171778005 | 171781615 | 6.73 |
| chr2 | 171784702 | 171786815 | 5.05 |
| chr2 | 171829547 | 171830648 | 4.37 |
| chr2 | 172213525 | 172214751 | 4.37 |
| chr2 | 172280015 | 172281235 | 5.05 |
| chr2 | 172286872 | 172288126 | 7.4  |
| chr2 | 172482932 | 172484169 | 3.7  |
| chr2 | 172486999 | 172488529 | 4.71 |
| chr2 | 172687132 | 172689308 | 7.4  |
| chr2 | 173057848 | 173059702 | 4.37 |
| chr2 | 173376119 | 173379750 | 7.06 |
| chr2 | 173380144 | 173381099 | 3.7  |
| chr2 | 173389731 | 173391168 | 5.72 |
| chr2 | 173397462 | 173400251 | 7.06 |
| chr2 | 173403708 | 173406194 | 9.75 |
| chr2 | 173409690 | 173411685 | 7.74 |
| chr2 | 173412017 | 173413250 | 4.71 |
| chr2 | 173667035 | 173668945 | 6.05 |

|      |           |           |       |
|------|-----------|-----------|-------|
| chr2 | 173803535 | 173804939 | 5.05  |
| chr2 | 173818543 | 173819415 | 4.04  |
| chr2 | 173862908 | 173864181 | 5.05  |
| chr2 | 173913516 | 173914442 | 3.36  |
| chr2 | 174162822 | 174164215 | 5.72  |
| chr2 | 174197082 | 174198644 | 4.71  |
| chr2 | 174210326 | 174211488 | 4.71  |
| chr2 | 174364952 | 174366827 | 5.05  |
| chr2 | 174457122 | 174458737 | 7.4   |
| chr2 | 175374154 | 175376414 | 17.83 |
| chr2 | 175536035 | 175537140 | 3.7   |
| chr2 | 177637189 | 177638514 | 4.04  |
| chr2 | 178127572 | 178128837 | 4.71  |
| chr2 | 178422182 | 178423325 | 3.03  |
| chr2 | 178476184 | 178477372 | 5.38  |
| chr2 | 178976522 | 178977404 | 3.36  |
| chr2 | 179344112 | 179344932 | 3.03  |
| chr2 | 180066498 | 180067533 | 3.7   |
| chr2 | 181201000 | 181202361 | 3.7   |
| chr2 | 181203162 | 181204013 | 3.36  |
| chr2 | 182074541 | 182075655 | 4.71  |
| chr2 | 183140859 | 183142274 | 6.39  |
| chr2 | 183240025 | 183241412 | 4.37  |
| chr2 | 185876589 | 185878713 | 7.06  |
| chr2 | 186374174 | 186376792 | 4.37  |
| chr2 | 186635016 | 186637143 | 5.72  |
| chr2 | 187092666 | 187093531 | 3.7   |
| chr2 | 187217355 | 187218616 | 4.71  |
| chr2 | 187552099 | 187553249 | 3.7   |
| chr2 | 187602438 | 187603955 | 5.05  |
| chr2 | 187636049 | 187637748 | 4.37  |
| chr2 | 187668207 | 187669356 | 5.72  |
| chr2 | 187745935 | 187747100 | 1.68  |
| chr2 | 189102165 | 189104228 | 10.43 |
| chr2 | 189694235 | 189695609 | 6.05  |
| chr2 | 189701253 | 189704640 | 9.08  |
| chr2 | 190183170 | 190184858 | 5.38  |
| chr2 | 190204066 | 190205842 | 4.37  |
| chr2 | 190207174 | 190208124 | 3.7   |
| chr2 | 190406401 | 190407406 | 3.7   |
| chr2 | 190805327 | 190808799 | 5.05  |
| chr2 | 190846853 | 190849081 | 4.04  |
| chr2 | 190882320 | 190883121 | 3.36  |

|      |           |           |       |
|------|-----------|-----------|-------|
| chr2 | 191004623 | 191006341 | 7.06  |
| chr2 | 191583247 | 191584458 | 4.37  |
| chr2 | 191650999 | 191652245 | 5.38  |
| chr2 | 191949849 | 191951469 | 4.71  |
| chr2 | 192348119 | 192348982 | 3.7   |
| chr2 | 193923673 | 193925342 | 4.71  |
| chr2 | 193995661 | 193996927 | 4.04  |
| chr2 | 195247519 | 195249706 | 9.42  |
| chr2 | 195468931 | 195470165 | 4.71  |
| chr2 | 195474529 | 195475839 | 6.39  |
| chr2 | 195849605 | 195850911 | 3.03  |
| chr2 | 196994558 | 196998682 | 15.14 |
| chr2 | 197217984 | 197219301 | 6.73  |
| chr2 | 197363155 | 197364461 | 6.05  |
| chr2 | 197515353 | 197519618 | 5.72  |
| chr2 | 197681840 | 197683966 | 4.37  |
| chr2 | 198299253 | 198300471 | 3.03  |
| chr2 | 198380057 | 198381359 | 4.04  |
| chr2 | 198391847 | 198392924 | 4.71  |
| chr2 | 198437789 | 198439318 | 5.72  |
| chr2 | 198625037 | 198626049 | 3.7   |
| chr2 | 199849991 | 199851131 | 4.71  |
| chr2 | 200738449 | 200739867 | 4.71  |
| chr2 | 200781443 | 200782512 | 4.71  |
| chr2 | 200819629 | 200820940 | 5.38  |
| chr2 | 200909959 | 200911169 | 4.37  |
| chr2 | 200999435 | 201000303 | 3.36  |
| chr2 | 201008697 | 201009838 | 5.05  |
| chr2 | 201164680 | 201165873 | 3.7   |
| chr2 | 201418237 | 201419580 | 5.05  |
| chr2 | 201983088 | 201984282 | 3.7   |
| chr2 | 202042173 | 202044489 | 3.36  |
| chr2 | 202189696 | 202191040 | 4.04  |
| chr2 | 203580803 | 203581719 | 7.06  |
| chr2 | 203968618 | 203969562 | 5.05  |
| chr2 | 204443373 | 204444439 | 3.36  |
| chr2 | 204511184 | 204512121 | 4.37  |
| chr2 | 205277114 | 205278350 | 4.37  |
| chr2 | 206382833 | 206384082 | 3.36  |
| chr2 | 206949939 | 206950978 | 4.04  |
| chr2 | 207151707 | 207152371 | 4.04  |
| chr2 | 207818056 | 207819246 | 5.05  |
| chr2 | 208236822 | 208237667 | 3.7   |

|      |           |           |      |
|------|-----------|-----------|------|
| chr2 | 209118637 | 209119496 | 4.37 |
| chr2 | 209258073 | 209260177 | 7.4  |
| chr2 | 209379445 | 209380483 | 3.36 |
| chr2 | 209460223 | 209461193 | 3.7  |
| chr2 | 209818932 | 209820332 | 5.05 |
| chr2 | 209830958 | 209831902 | 3.03 |
| chr2 | 209848172 | 209849180 | 4.71 |
| chr2 | 209868671 | 209870114 | 4.37 |
| chr2 | 209870355 | 209872411 | 6.05 |
| chr2 | 210240356 | 210241849 | 3.7  |
| chr2 | 210866578 | 210867680 | 4.37 |
| chr2 | 211291432 | 211292981 | 4.37 |
| chr2 | 211888582 | 211890480 | 5.38 |
| chr2 | 212273047 | 212273796 | 4.71 |
| chr2 | 212549194 | 212550060 | 3.7  |
| chr2 | 212803399 | 212804235 | 3.7  |
| chr2 | 212916956 | 212918230 | 3.7  |
| chr2 | 212919913 | 212920882 | 4.04 |
| chr2 | 213726658 | 213728682 | 9.75 |
| chr2 | 213729975 | 213731024 | 3.36 |
| chr2 | 213770151 | 213771326 | 4.71 |
| chr2 | 214040195 | 214041485 | 5.38 |
| chr2 | 214339733 | 214341028 | 4.37 |
| chr2 | 214533844 | 214535031 | 4.71 |
| chr2 | 214546391 | 214547457 | 3.7  |
| chr2 | 214981213 | 214982593 | 3.7  |
| chr2 | 215996971 | 215998418 | 4.04 |
| chr2 | 216001907 | 216003082 | 3.7  |
| chr2 | 216073508 | 216077514 | 6.05 |
| chr2 | 217819115 | 217820419 | 4.71 |
| chr2 | 218006280 | 218007719 | 4.37 |
| chr2 | 218154477 | 218155389 | 4.04 |
| chr2 | 218252376 | 218253316 | 4.37 |
| chr2 | 218625792 | 218627380 | 7.06 |
| chr2 | 219081010 | 219082300 | 4.71 |
| chr2 | 219215674 | 219217270 | 3.7  |
| chr2 | 219523164 | 219524022 | 3.36 |
| chr2 | 220143907 | 220144619 | 3.7  |
| chr2 | 220525406 | 220526737 | 4.71 |
| chr2 | 220995085 | 220996106 | 4.37 |
| chr2 | 221055477 | 221058487 | 5.38 |
| chr2 | 221141961 | 221142903 | 4.71 |
| chr2 | 221266265 | 221267948 | 6.39 |



|      |           |           |       |
|------|-----------|-----------|-------|
| chr2 | 221274044 | 221276536 | 3.7   |
| chr2 | 221397584 | 221399087 | 5.05  |
| chr2 | 221399459 | 221400383 | 4.37  |
| chr2 | 221484142 | 221485164 | 4.04  |
| chr2 | 221790480 | 221792134 | 13.12 |
| chr2 | 223277873 | 223278779 | 5.05  |
| chr2 | 225600461 | 225601986 | 7.4   |
| chr2 | 225622194 | 225623457 | 5.38  |
| chr2 | 226182407 | 226184670 | 6.05  |
| chr2 | 227031799 | 227033120 | 3.7   |
| chr2 | 227042367 | 227043772 | 4.04  |
| chr2 | 227154893 | 227156799 | 4.71  |
| chr2 | 228297516 | 228298705 | 5.05  |
| chr2 | 229399649 | 229402531 | 7.06  |
| chr2 | 231964152 | 231965373 | 4.71  |
| chr2 | 232650723 | 232651891 | 3.7   |
| chr2 | 234554224 | 234555599 | 5.38  |
| chr2 | 235551552 | 235552880 | 6.39  |
| chr2 | 235605587 | 235606841 | 7.06  |
| chr2 | 237718008 | 237719030 | 4.04  |
| chr2 | 237790508 | 237791527 | 4.71  |
| chr2 | 237956699 | 237958104 | 5.05  |
| chr2 | 238055470 | 238056805 | 6.39  |
| chr2 | 238147952 | 238151223 | 9.08  |
| chr2 | 238398795 | 238401216 | 7.4   |
| chr2 | 238838728 | 238839950 | 5.38  |
| chr2 | 238852186 | 238853766 | 5.38  |
| chr2 | 238870654 | 238872011 | 8.07  |
| chr2 | 239437544 | 239438963 | 3.7   |
| chr2 | 239717016 | 239718173 | 5.05  |
| chr2 | 240276476 | 240277401 | 3.36  |
| chr2 | 240823549 | 240825030 | 4.71  |
| chr2 | 240856309 | 240857872 | 7.4   |
| chr2 | 241201682 | 241202898 | 4.37  |
| chr2 | 241210893 | 241212056 | 5.05  |
| chr2 | 241470988 | 241472412 | 5.38  |
| chr2 | 241572776 | 241574764 | 12.78 |
| chr2 | 241793369 | 241794505 | 5.72  |
| chr2 | 241964495 | 241966479 | 14.13 |
| chr2 | 242041244 | 242042354 | 3.36  |
| chr2 | 242210989 | 242212022 | 4.71  |
| chr2 | 242254253 | 242255490 | 3.7   |
| chr2 | 242525566 | 242526711 | 6.05  |

|      |           |           |       |
|------|-----------|-----------|-------|
| chr2 | 242576445 | 242577337 | 4.04  |
| chr2 | 242578411 | 242579689 | 6.39  |
| chr2 | 242640605 | 242641736 | 4.04  |
| chr2 | 242697455 | 242699028 | 3.36  |
| chr2 | 242719759 | 242721565 | 10.43 |
| chr2 | 242728153 | 242731120 | 5.05  |
| chr2 | 242768832 | 242770380 | 4.71  |
| chr1 | 567003    | 568275    | 16.82 |
| chr1 | 569581    | 570329    | 16.82 |
| chr1 | 2009193   | 2010398   | 5.38  |
| chr1 | 2344200   | 2345055   | 1.35  |
| chr1 | 2360923   | 2362223   | 2.69  |
| chr1 | 2568216   | 2569775   | 5.38  |
| chr1 | 2577717   | 2579183   | 7.06  |
| chr1 | 2583748   | 2586625   | 4.04  |
| chr1 | 2614849   | 2616367   | 4.37  |
| chr1 | 2619146   | 2620171   | 1.68  |
| chr1 | 2627714   | 2628487   | 1.01  |
| chr1 | 2628733   | 2629837   | 1.68  |
| chr1 | 6427750   | 6428639   | 3.7   |
| chr1 | 9090973   | 9092214   | 5.38  |
| chr1 | 9884995   | 9885816   | 4.04  |
| chr1 | 11565345  | 11567214  | 8.07  |
| chr1 | 12282470  | 12283413  | 4.04  |
| chr1 | 12699503  | 12701242  | 6.05  |
| chr1 | 12810173  | 12810856  | 4.37  |
| chr1 | 16832569  | 16833711  | 4.37  |
| chr1 | 16890914  | 16894254  | 5.38  |
| chr1 | 16931899  | 16932860  | 3.03  |
| chr1 | 16934277  | 16936323  | 6.39  |
| chr1 | 16938235  | 16945639  | 6.39  |
| chr1 | 16947256  | 16948786  | 4.04  |
| chr1 | 16950164  | 16951381  | 5.05  |
| chr1 | 16951948  | 16952776  | 3.03  |
| chr1 | 16963138  | 16964195  | 3.7   |
| chr1 | 16970122  | 16972034  | 5.05  |
| chr1 | 17027585  | 17028460  | 1.35  |
| chr1 | 17039732  | 17040756  | 3.7   |
| chr1 | 17051037  | 17052148  | 3.03  |
| chr1 | 17053329  | 17054938  | 4.37  |
| chr1 | 17231638  | 17232991  | 6.05  |
| chr1 | 17481225  | 17482529  | 4.71  |
| chr1 | 18085351  | 18086187  | 2.35  |

|      |          |          |       |
|------|----------|----------|-------|
| chr1 | 18737844 | 18739155 | 6.39  |
| chr1 | 19620469 | 19622131 | 6.73  |
| chr1 | 20377270 | 20378773 | 5.05  |
| chr1 | 20485956 | 20487925 | 5.72  |
| chr1 | 22121005 | 22122460 | 6.39  |
| chr1 | 22777806 | 22778674 | 4.04  |
| chr1 | 23319291 | 23320852 | 5.38  |
| chr1 | 23687808 | 23689839 | 8.75  |
| chr1 | 24204492 | 24206693 | 5.72  |
| chr1 | 26946835 | 26947810 | 3.36  |
| chr1 | 27018999 | 27019811 | 3.7   |
| chr1 | 27470813 | 27471704 | 4.37  |
| chr1 | 27506408 | 27509690 | 5.05  |
| chr1 | 27648236 | 27649121 | 5.38  |
| chr1 | 28006587 | 28007343 | 4.04  |
| chr1 | 29705418 | 29706763 | 6.05  |
| chr1 | 30039716 | 30040840 | 5.38  |
| chr1 | 30078955 | 30081182 | 5.05  |
| chr1 | 30315009 | 30315774 | 4.04  |
| chr1 | 30515268 | 30516556 | 4.04  |
| chr1 | 30564789 | 30566237 | 7.06  |
| chr1 | 31099720 | 31100474 | 3.7   |
| chr1 | 31930717 | 31932183 | 5.72  |
| chr1 | 31939335 | 31940682 | 4.71  |
| chr1 | 32397974 | 32398819 | 3.7   |
| chr1 | 32923274 | 32925556 | 6.05  |
| chr1 | 33881277 | 33882887 | 4.71  |
| chr1 | 33958970 | 33961854 | 4.71  |
| chr1 | 34977115 | 34978211 | 4.71  |
| chr1 | 35593827 | 35595152 | 5.72  |
| chr1 | 38370779 | 38372438 | 11.77 |
| chr1 | 38455562 | 38456248 | 4.71  |
| chr1 | 40927281 | 40930823 | 13.79 |
| chr1 | 40960332 | 40962502 | 9.42  |
| chr1 | 41012164 | 41013253 | 3.7   |
| chr1 | 41804114 | 41804969 | 5.38  |
| chr1 | 42969481 | 42971156 | 7.74  |
| chr1 | 42971416 | 42973514 | 7.4   |
| chr1 | 42978055 | 42979100 | 4.04  |
| chr1 | 43573941 | 43574840 | 3.7   |
| chr1 | 43586494 | 43587672 | 4.37  |
| chr1 | 43711835 | 43713408 | 5.05  |
| chr1 | 43727850 | 43730168 | 11.1  |

|      |          |          |      |
|------|----------|----------|------|
| chr1 | 44639716 | 44641127 | 9.75 |
| chr1 | 45355202 | 45356558 | 7.74 |
| chr1 | 45723218 | 45724832 | 8.75 |
| chr1 | 45910376 | 45911241 | 4.04 |
| chr1 | 46218550 | 46219882 | 4.71 |
| chr1 | 46858588 | 46859893 | 5.38 |
| chr1 | 47235851 | 47237000 | 4.71 |
| chr1 | 47239426 | 47241007 | 8.41 |
| chr1 | 47249402 | 47251235 | 6.39 |
| chr1 | 47994798 | 47995600 | 2.35 |
| chr1 | 48653096 | 48654597 | 7.74 |
| chr1 | 51598260 | 51599558 | 5.05 |
| chr1 | 51851454 | 51852508 | 4.71 |
| chr1 | 52682175 | 52683490 | 6.73 |
| chr1 | 52690348 | 52691719 | 6.39 |
| chr1 | 54399537 | 54400778 | 4.71 |
| chr1 | 54419558 | 54421216 | 5.72 |
| chr1 | 55108904 | 55110087 | 5.05 |
| chr1 | 58837218 | 58838096 | 3.7  |
| chr1 | 61430531 | 61431868 | 4.71 |
| chr1 | 67533177 | 67533983 | 4.04 |
| chr1 | 67715315 | 67716820 | 5.05 |
| chr1 | 67849139 | 67850601 | 5.38 |
| chr1 | 69085801 | 69087210 | 6.39 |
| chr1 | 71236997 | 71238353 | 5.05 |
| chr1 | 71804649 | 71805772 | 5.05 |
| chr1 | 77640390 | 77641859 | 8.07 |
| chr1 | 78976451 | 78977890 | 7.06 |
| chr1 | 80575765 | 80577140 | 4.37 |
| chr1 | 81637274 | 81638918 | 5.05 |
| chr1 | 83090618 | 83092146 | 6.39 |
| chr1 | 84534347 | 84535911 | 7.74 |
| chr1 | 84655714 | 84657044 | 6.05 |
| chr1 | 84751925 | 84753852 | 5.05 |
| chr1 | 85070445 | 85071783 | 5.72 |
| chr1 | 85690300 | 85691281 | 4.37 |
| chr1 | 85980353 | 85981250 | 5.05 |
| chr1 | 85986578 | 85989719 | 4.04 |
| chr1 | 85994125 | 85994923 | 4.04 |
| chr1 | 86003105 | 86004972 | 4.04 |
| chr1 | 86025216 | 86026366 | 4.71 |
| chr1 | 89676241 | 89677337 | 6.73 |
| chr1 | 91344707 | 91345714 | 3.36 |

|      |           |           |       |
|------|-----------|-----------|-------|
| chr1 | 91553306  | 91554174  | 4.37  |
| chr1 | 96362562  | 96364029  | 9.42  |
| chr1 | 96377126  | 96378105  | 5.72  |
| chr1 | 96619746  | 96621817  | 5.38  |
| chr1 | 96656138  | 96657612  | 4.04  |
| chr1 | 97521646  | 97522983  | 5.72  |
| chr1 | 106735480 | 106755747 | 7.74  |
| chr1 | 106756282 | 106782158 | 8.75  |
| chr1 | 106784914 | 106817302 | 10.43 |
| chr1 | 106817534 | 106822609 | 5.72  |
| chr1 | 106823149 | 106826991 | 7.06  |
| chr1 | 106827518 | 106854090 | 11.1  |
| chr1 | 106857316 | 106876038 | 8.75  |
| chr1 | 106876462 | 106954736 | 16.82 |
| chr1 | 106955646 | 106968792 | 8.07  |
| chr1 | 106969666 | 107139331 | 15.81 |
| chr1 | 107139606 | 107473154 | 16.15 |
| chr1 | 107476370 | 107539361 | 18.16 |
| chr1 | 107540556 | 107555669 | 7.74  |
| chr1 | 107556174 | 107565603 | 6.05  |
| chr1 | 107565928 | 107733374 | 11.77 |
| chr1 | 107734681 | 107931133 | 9.75  |
| chr1 | 108135492 | 108137583 | 4.71  |
| chr1 | 108139637 | 108140698 | 3.36  |
| chr1 | 108168609 | 108169912 | 4.04  |
| chr1 | 108186159 | 108187656 | 4.04  |
| chr1 | 108222704 | 108223673 | 3.7   |
| chr1 | 108224697 | 108227124 | 4.04  |
| chr1 | 108231622 | 108233087 | 4.71  |
| chr1 | 108251128 | 108252124 | 3.36  |
| chr1 | 108271310 | 108272232 | 3.7   |
| chr1 | 108280694 | 108282342 | 4.71  |
| chr1 | 108300102 | 108301256 | 4.37  |
| chr1 | 108319655 | 108320461 | 3.36  |
| chr1 | 108340241 | 108341049 | 3.03  |
| chr1 | 108359968 | 108360763 | 3.36  |
| chr1 | 108453619 | 108454514 | 2.35  |
| chr1 | 108478789 | 108480119 | 5.05  |
| chr1 | 108501993 | 108502950 | 3.36  |
| chr1 | 108505330 | 108508579 | 4.37  |
| chr1 | 108549501 | 108550693 | 4.37  |
| chr1 | 108558891 | 108560676 | 3.7   |
| chr1 | 108590173 | 108591699 | 3.36  |

|      |           |           |       |
|------|-----------|-----------|-------|
| chr1 | 108598748 | 108599964 | 4.04  |
| chr1 | 108643738 | 108644716 | 3.03  |
| chr1 | 108647819 | 108650219 | 6.73  |
| chr1 | 108660285 | 108663271 | 4.37  |
| chr1 | 108668702 | 108669557 | 2.35  |
| chr1 | 108674577 | 108676609 | 4.37  |
| chr1 | 108684065 | 108685525 | 4.37  |
| chr1 | 108690410 | 108691728 | 3.7   |
| chr1 | 108703680 | 108704586 | 3.7   |
| chr1 | 108710462 | 108720488 | 12.11 |
| chr1 | 108725330 | 108726830 | 4.37  |
| chr1 | 108728664 | 108729532 | 3.7   |
| chr1 | 108730442 | 108738336 | 4.71  |
| chr1 | 108740412 | 108744398 | 6.73  |
| chr1 | 108752576 | 108753743 | 3.7   |
| chr1 | 108855308 | 108856167 | 3.36  |
| chr1 | 108858919 | 108860513 | 3.7   |
| chr1 | 108864018 | 108865014 | 3.7   |
| chr1 | 108866132 | 108867342 | 4.37  |
| chr1 | 108870619 | 108871542 | 3.03  |
| chr1 | 108880702 | 108881963 | 3.36  |
| chr1 | 108883214 | 108885130 | 4.71  |
| chr1 | 108888465 | 108890979 | 3.36  |
| chr1 | 108892351 | 108893122 | 3.36  |
| chr1 | 108894865 | 108900998 | 4.71  |
| chr1 | 109020888 | 109022540 | 5.38  |
| chr1 | 109027202 | 109029323 | 5.05  |
| chr1 | 109045419 | 109046290 | 3.7   |
| chr1 | 109075444 | 109076787 | 4.71  |
| chr1 | 109123050 | 109124426 | 4.37  |
| chr1 | 109234411 | 109236395 | 4.04  |
| chr1 | 109327291 | 109329029 | 9.42  |
| chr1 | 109419200 | 109420143 | 2.35  |
| chr1 | 109608429 | 109609511 | 4.37  |
| chr1 | 109618161 | 109619410 | 5.38  |
| chr1 | 109632823 | 109634102 | 4.37  |
| chr1 | 109691816 | 109692567 | 4.04  |
| chr1 | 109756973 | 109758186 | 3.36  |
| chr1 | 109782367 | 109784359 | 4.37  |
| chr1 | 109791207 | 109792637 | 4.37  |
| chr1 | 109805791 | 109807037 | 4.71  |
| chr1 | 109817017 | 109818305 | 5.05  |
| chr1 | 109825091 | 109826175 | 3.36  |

|      |           |           |       |
|------|-----------|-----------|-------|
| chr1 | 109841422 | 109842535 | 4.04  |
| chr1 | 109967970 | 109970168 | 4.37  |
| chr1 | 109976862 | 109977676 | 3.36  |
| chr1 | 109995571 | 109999462 | 21.86 |
| chr1 | 110036074 | 110037240 | 4.04  |
| chr1 | 110090681 | 110092009 | 3.7   |
| chr1 | 110251076 | 110252506 | 4.71  |
| chr1 | 110267711 | 110268827 | 3.7   |
| chr1 | 110275997 | 110277172 | 4.04  |
| chr1 | 110283528 | 110284838 | 3.7   |
| chr1 | 110358732 | 110359580 | 3.7   |
| chr1 | 110374689 | 110375742 | 4.04  |
| chr1 | 110379583 | 110381427 | 8.75  |
| chr1 | 110664856 | 110667383 | 3.7   |
| chr1 | 110674568 | 110675842 | 1.68  |
| chr1 | 110707556 | 110708892 | 3.7   |
| chr1 | 112055641 | 112056718 | 3.7   |
| chr1 | 112289611 | 112290674 | 5.38  |
| chr1 | 112297589 | 112298554 | 3.36  |
| chr1 | 112365167 | 112443083 | 8.41  |
| chr1 | 112443519 | 112481753 | 8.75  |
| chr1 | 112483574 | 112551698 | 9.42  |
| chr1 | 112552755 | 112565238 | 15.14 |
| chr1 | 112565891 | 112574363 | 5.72  |
| chr1 | 113438499 | 113440005 | 3.7   |
| chr1 | 113757223 | 113758265 | 3.7   |
| chr1 | 114021882 | 114023242 | 4.71  |
| chr1 | 114050677 | 114051748 | 3.36  |
| chr1 | 114053281 | 114055285 | 6.05  |
| chr1 | 114066207 | 114066986 | 3.7   |
| chr1 | 114068477 | 114069463 | 3.36  |
| chr1 | 114070198 | 114071705 | 4.71  |
| chr1 | 114076688 | 114077834 | 5.72  |
| chr1 | 114080383 | 114081198 | 3.7   |
| chr1 | 114099175 | 114100631 | 3.7   |
| chr1 | 114107842 | 114111550 | 4.04  |
| chr1 | 114130855 | 114132060 | 4.37  |
| chr1 | 114138254 | 114139158 | 3.7   |
| chr1 | 114139475 | 114141093 | 5.38  |
| chr1 | 114214270 | 114216235 | 3.7   |
| chr1 | 114216968 | 114218171 | 4.37  |
| chr1 | 114231867 | 114233233 | 3.7   |
| chr1 | 114235496 | 114242790 | 10.76 |

|      |           |           |       |
|------|-----------|-----------|-------|
| chr1 | 114244931 | 114246024 | 3.03  |
| chr1 | 114247227 | 114249007 | 3.7   |
| chr1 | 114255798 | 114257247 | 4.04  |
| chr1 | 114259247 | 114264587 | 5.05  |
| chr1 | 114279842 | 114281446 | 3.36  |
| chr1 | 114283388 | 114284944 | 4.04  |
| chr1 | 114299636 | 114309853 | 6.05  |
| chr1 | 114311172 | 114312092 | 3.7   |
| chr1 | 114312396 | 114314517 | 3.7   |
| chr1 | 114315130 | 114316213 | 4.37  |
| chr1 | 114322797 | 114324418 | 3.36  |
| chr1 | 114325093 | 114326306 | 4.37  |
| chr1 | 114326990 | 114332021 | 4.71  |
| chr1 | 114332625 | 114335523 | 4.04  |
| chr1 | 114336148 | 114336960 | 4.37  |
| chr1 | 114342277 | 114344794 | 5.38  |
| chr1 | 114345285 | 114349843 | 7.74  |
| chr1 | 114350288 | 114368484 | 9.42  |
| chr1 | 114369214 | 114384952 | 6.39  |
| chr1 | 114385583 | 114395817 | 10.09 |
| chr1 | 114396406 | 114435361 | 7.06  |
| chr1 | 114435646 | 114572732 | 13.12 |
| chr1 | 114573247 | 114725438 | 12.78 |
| chr1 | 114730171 | 114747627 | 8.41  |
| chr1 | 114747837 | 114786280 | 9.08  |
| chr1 | 114788158 | 114788977 | 3.36  |
| chr1 | 114790379 | 114847708 | 12.11 |
| chr1 | 114852731 | 115105317 | 33.3  |
| chr1 | 115106115 | 115326551 | 12.45 |
| chr1 | 115327404 | 115329315 | 4.71  |
| chr1 | 115334128 | 115346578 | 6.05  |
| chr1 | 115347672 | 115365539 | 8.07  |
| chr1 | 115366640 | 115370149 | 4.71  |
| chr1 | 115372860 | 115376397 | 5.72  |
| chr1 | 115379285 | 115382936 | 5.05  |
| chr1 | 115383791 | 115385349 | 4.04  |
| chr1 | 115385854 | 115389094 | 5.38  |
| chr1 | 115394748 | 115396733 | 4.37  |
| chr1 | 115396992 | 115398406 | 3.7   |
| chr1 | 115407556 | 115411396 | 5.05  |
| chr1 | 115414156 | 115415614 | 4.04  |
| chr1 | 115422572 | 115423771 | 3.7   |
| chr1 | 115423981 | 115426034 | 4.04  |



|      |           |           |      |
|------|-----------|-----------|------|
| chr1 | 115426463 | 115429160 | 5.38 |
| chr1 | 115433987 | 115435556 | 2.35 |
| chr1 | 115436489 | 115437293 | 4.37 |
| chr1 | 115438380 | 115440083 | 3.36 |
| chr1 | 115441508 | 115449174 | 5.05 |
| chr1 | 115451201 | 115452386 | 3.7  |
| chr1 | 115459322 | 115461525 | 4.71 |
| chr1 | 115462335 | 115463830 | 3.36 |
| chr1 | 115464757 | 115466249 | 5.72 |
| chr1 | 115472271 | 115474657 | 3.7  |
| chr1 | 115481342 | 115483458 | 3.7  |
| chr1 | 115483833 | 115486172 | 4.04 |
| chr1 | 115488379 | 115489577 | 4.37 |
| chr1 | 115492149 | 115493081 | 3.7  |
| chr1 | 115495406 | 115497164 | 3.7  |
| chr1 | 115497885 | 115499626 | 5.38 |
| chr1 | 115508930 | 115509896 | 3.7  |
| chr1 | 115511528 | 115514824 | 4.37 |
| chr1 | 115515288 | 115517700 | 4.71 |
| chr1 | 115521330 | 115523311 | 3.7  |
| chr1 | 115523779 | 115533789 | 7.4  |
| chr1 | 115538201 | 115540369 | 4.04 |
| chr1 | 115544664 | 115547035 | 4.04 |
| chr1 | 115547482 | 115548518 | 4.04 |
| chr1 | 115549141 | 115550283 | 4.04 |
| chr1 | 115551340 | 115553142 | 4.71 |
| chr1 | 115555893 | 115556763 | 3.7  |
| chr1 | 115563411 | 115565308 | 4.04 |
| chr1 | 115565951 | 115568934 | 3.7  |
| chr1 | 115570188 | 115572134 | 5.05 |
| chr1 | 115575461 | 115576914 | 3.7  |
| chr1 | 115577310 | 115579239 | 3.7  |
| chr1 | 115583331 | 115584926 | 3.36 |
| chr1 | 115586612 | 115589368 | 5.05 |
| chr1 | 115592983 | 115596687 | 4.37 |
| chr1 | 115598613 | 115601229 | 3.7  |
| chr1 | 115602206 | 115603109 | 3.7  |
| chr1 | 115604720 | 115610858 | 4.04 |
| chr1 | 115611286 | 115612909 | 3.7  |
| chr1 | 115613535 | 115614325 | 3.36 |
| chr1 | 115618078 | 115619567 | 5.38 |
| chr1 | 115624392 | 115625863 | 3.7  |
| chr1 | 115628502 | 115629486 | 4.04 |

|      |           |           |      |
|------|-----------|-----------|------|
| chr1 | 115630401 | 115634715 | 4.37 |
| chr1 | 115637534 | 115638706 | 4.04 |
| chr1 | 115664151 | 115664999 | 3.7  |
| chr1 | 115666420 | 115668278 | 3.7  |
| chr1 | 115721698 | 115723058 | 5.05 |
| chr1 | 115786991 | 115788459 | 3.7  |
| chr1 | 115794100 | 115795252 | 3.7  |
| chr1 | 115800512 | 115802087 | 5.38 |
| chr1 | 115819556 | 115820497 | 4.04 |
| chr1 | 115896724 | 115897730 | 4.37 |
| chr1 | 115898516 | 115899700 | 3.7  |
| chr1 | 115902480 | 115903592 | 3.7  |
| chr1 | 115999775 | 116000582 | 5.05 |
| chr1 | 116009710 | 116010756 | 3.36 |
| chr1 | 116037776 | 116038701 | 1.68 |
| chr1 | 116088381 | 116089362 | 3.7  |
| chr1 | 116114675 | 116116179 | 4.37 |
| chr1 | 116129572 | 116135083 | 9.08 |
| chr1 | 116150521 | 116151540 | 5.38 |
| chr1 | 116162784 | 116164201 | 5.72 |
| chr1 | 116173381 | 116174396 | 3.7  |
| chr1 | 116183932 | 116185252 | 4.37 |
| chr1 | 116207653 | 116209303 | 5.72 |
| chr1 | 116210765 | 116212234 | 4.37 |
| chr1 | 116255273 | 116258430 | 6.39 |
| chr1 | 116269172 | 116270543 | 3.7  |
| chr1 | 116323871 | 116325923 | 4.04 |
| chr1 | 116349584 | 116350457 | 2.35 |
| chr1 | 116353077 | 116354633 | 4.37 |
| chr1 | 116363985 | 116364751 | 3.7  |
| chr1 | 116372177 | 116373007 | 4.04 |
| chr1 | 116453915 | 116454773 | 3.7  |
| chr1 | 116471235 | 116472110 | 2.02 |
| chr1 | 116473705 | 116475042 | 5.38 |
| chr1 | 116494880 | 116496124 | 5.05 |
| chr1 | 116546192 | 116547389 | 5.38 |
| chr1 | 116632144 | 116632897 | 3.36 |
| chr1 | 116638338 | 116640285 | 3.7  |
| chr1 | 116641266 | 116642291 | 4.37 |
| chr1 | 116650269 | 116651616 | 3.7  |
| chr1 | 116652523 | 116654790 | 4.04 |
| chr1 | 116698381 | 116699914 | 3.7  |
| chr1 | 116744848 | 116746316 | 3.36 |

|      |           |           |      |
|------|-----------|-----------|------|
| chr1 | 116755149 | 116756107 | 3.7  |
| chr1 | 116797694 | 116798761 | 3.7  |
| chr1 | 116802382 | 116803685 | 3.7  |
| chr1 | 116809471 | 116813415 | 6.05 |
| chr1 | 116816829 | 116818030 | 4.37 |
| chr1 | 116818732 | 116819588 | 3.7  |
| chr1 | 116819815 | 116823624 | 4.71 |
| chr1 | 116826059 | 116826894 | 3.36 |
| chr1 | 116832019 | 116833861 | 6.39 |
| chr1 | 116840520 | 116842419 | 4.04 |
| chr1 | 116844497 | 116846093 | 4.37 |
| chr1 | 116848410 | 116850231 | 4.71 |
| chr1 | 116851768 | 116852778 | 3.03 |
| chr1 | 116853391 | 116856408 | 6.05 |
| chr1 | 116858394 | 116860672 | 3.7  |
| chr1 | 116861032 | 116862369 | 2.69 |
| chr1 | 116864297 | 116866468 | 3.36 |
| chr1 | 116870631 | 116873164 | 4.71 |
| chr1 | 116873998 | 116880968 | 4.71 |
| chr1 | 116881589 | 116882613 | 4.71 |
| chr1 | 116883711 | 116885380 | 4.37 |
| chr1 | 116886248 | 116887553 | 4.04 |
| chr1 | 116888693 | 116889559 | 3.36 |
| chr1 | 116889953 | 116892369 | 4.37 |
| chr1 | 116895818 | 116896532 | 3.7  |
| chr1 | 116896985 | 116898013 | 2.69 |
| chr1 | 116898866 | 116900040 | 3.36 |
| chr1 | 116902974 | 116906210 | 3.7  |
| chr1 | 116906866 | 116911624 | 4.04 |
| chr1 | 116914074 | 116923124 | 6.39 |
| chr1 | 116931460 | 116932298 | 3.03 |
| chr1 | 116936943 | 116938427 | 5.38 |
| chr1 | 116943272 | 116944255 | 2.02 |
| chr1 | 116945720 | 116946967 | 4.04 |
| chr1 | 116947456 | 116948870 | 3.7  |
| chr1 | 116959629 | 116961853 | 4.04 |
| chr1 | 116974398 | 116976373 | 4.71 |
| chr1 | 116983223 | 116984447 | 4.37 |
| chr1 | 117004704 | 117005504 | 3.7  |
| chr1 | 117007931 | 117010328 | 4.04 |
| chr1 | 117011901 | 117013497 | 3.36 |
| chr1 | 117024786 | 117027015 | 3.36 |
| chr1 | 117036257 | 117038007 | 4.71 |

|      |           |           |       |
|------|-----------|-----------|-------|
| chr1 | 117043665 | 117044865 | 4.04  |
| chr1 | 117050434 | 117052578 | 4.04  |
| chr1 | 117058660 | 117060410 | 4.71  |
| chr1 | 117100406 | 117101520 | 4.04  |
| chr1 | 117111874 | 117114472 | 4.04  |
| chr1 | 117208511 | 117210962 | 5.05  |
| chr1 | 117216618 | 117217861 | 4.04  |
| chr1 | 117223045 | 117224121 | 4.04  |
| chr1 | 117250394 | 117251246 | 3.7   |
| chr1 | 117266947 | 117268003 | 4.37  |
| chr1 | 117276479 | 117277436 | 2.02  |
| chr1 | 117281026 | 117281866 | 3.36  |
| chr1 | 117282760 | 117292547 | 17.49 |
| chr1 | 117338624 | 117339492 | 3.7   |
| chr1 | 117353958 | 117357170 | 4.71  |
| chr1 | 117359794 | 117360968 | 4.37  |
| chr1 | 117410816 | 117412111 | 4.37  |
| chr1 | 117420082 | 117421496 | 4.71  |
| chr1 | 117437111 | 117438507 | 5.72  |
| chr1 | 117443773 | 117446001 | 3.7   |
| chr1 | 117452099 | 117454064 | 4.37  |
| chr1 | 117457772 | 117458937 | 3.7   |
| chr1 | 117512702 | 117513675 | 2.02  |
| chr1 | 117547819 | 117548668 | 2.69  |
| chr1 | 117551081 | 117552093 | 3.36  |
| chr1 | 117694207 | 117695746 | 3.36  |
| chr1 | 117752989 | 117754286 | 5.05  |
| chr1 | 117767722 | 117769391 | 4.71  |
| chr1 | 117774435 | 117775244 | 3.36  |
| chr1 | 117781780 | 117782725 | 4.37  |
| chr1 | 117800682 | 117803039 | 4.71  |
| chr1 | 117808972 | 117810543 | 6.73  |
| chr1 | 117810893 | 117812544 | 6.73  |
| chr1 | 117837429 | 117838985 | 4.04  |
| chr1 | 117854081 | 117854845 | 3.36  |
| chr1 | 117894181 | 117895059 | 4.04  |
| chr1 | 117901326 | 117902149 | 4.04  |
| chr1 | 117925468 | 117926910 | 3.7   |
| chr1 | 117929673 | 117930892 | 3.7   |
| chr1 | 117967879 | 117968786 | 3.7   |
| chr1 | 117969532 | 117971058 | 4.71  |
| chr1 | 118082954 | 118085134 | 4.71  |
| chr1 | 118097935 | 118098878 | 4.37  |

|      |           |           |       |
|------|-----------|-----------|-------|
| chr1 | 118105102 | 118106384 | 4.71  |
| chr1 | 118107137 | 118108066 | 3.7   |
| chr1 | 118113121 | 118114826 | 4.71  |
| chr1 | 118116876 | 118117959 | 3.36  |
| chr1 | 118132839 | 118134663 | 5.05  |
| chr1 | 118148496 | 118150600 | 3.7   |
| chr1 | 118172242 | 118173187 | 2.02  |
| chr1 | 118196165 | 118198766 | 5.05  |
| chr1 | 118223820 | 118226889 | 4.71  |
| chr1 | 118240659 | 118241584 | 4.04  |
| chr1 | 118248817 | 118249658 | 3.03  |
| chr1 | 118261075 | 118263059 | 4.04  |
| chr1 | 118289498 | 118291482 | 3.7   |
| chr1 | 118300996 | 118302523 | 5.72  |
| chr1 | 118312426 | 118314840 | 7.74  |
| chr1 | 118315582 | 118316753 | 4.37  |
| chr1 | 118324692 | 118325726 | 3.7   |
| chr1 | 118363903 | 118365350 | 7.06  |
| chr1 | 118727809 | 118728711 | 3.36  |
| chr1 | 119120633 | 119121831 | 4.04  |
| chr1 | 119178012 | 119179342 | 4.37  |
| chr1 | 120216157 | 120217582 | 3.7   |
| chr1 | 120243277 | 120245219 | 4.37  |
| chr1 | 120286040 | 120287608 | 3.36  |
| chr1 | 120310664 | 120311719 | 4.37  |
| chr1 | 120322203 | 120323738 | 3.7   |
| chr1 | 120335498 | 120336553 | 3.36  |
| chr1 | 120475248 | 120476673 | 5.05  |
| chr1 | 120532723 | 120533499 | 3.36  |
| chr1 | 121351231 | 121358810 | 20.85 |
| chr1 | 121359297 | 121360259 | 5.05  |
| chr1 | 121369520 | 121370337 | 4.37  |
| chr1 | 121376178 | 121376955 | 6.05  |
| chr1 | 121381510 | 121382716 | 6.05  |
| chr1 | 121386084 | 121387359 | 6.73  |
| chr1 | 121478253 | 121480814 | 16.82 |
| chr1 | 121482594 | 121485597 | 74.67 |
| chr1 | 142535314 | 142539885 | 10.76 |
| chr1 | 144005022 | 144017014 | 6.05  |
| chr1 | 144018206 | 144019687 | 5.72  |
| chr1 | 144526258 | 144531839 | 7.4   |
| chr1 | 144840468 | 144841453 | 4.37  |
| chr1 | 144842976 | 144844168 | 4.04  |

|      |           |           |       |
|------|-----------|-----------|-------|
| chr1 | 144859216 | 144860592 | 4.71  |
| chr1 | 144863840 | 144874012 | 4.71  |
| chr1 | 144874924 | 144877218 | 3.7   |
| chr1 | 144877466 | 144878396 | 3.36  |
| chr1 | 144879514 | 144881584 | 4.04  |
| chr1 | 144881847 | 144883567 | 3.36  |
| chr1 | 144884448 | 144888231 | 4.71  |
| chr1 | 144889669 | 144891589 | 5.05  |
| chr1 | 144895102 | 144896670 | 4.37  |
| chr1 | 144909432 | 144910774 | 4.37  |
| chr1 | 144911882 | 144913035 | 2.69  |
| chr1 | 144915713 | 144918009 | 4.71  |
| chr1 | 144920728 | 144944599 | 7.74  |
| chr1 | 144945666 | 144949312 | 5.05  |
| chr1 | 144985842 | 145049300 | 12.45 |
| chr1 | 145053676 | 145093170 | 8.75  |
| chr1 | 145095811 | 145118767 | 9.08  |
| chr1 | 145208754 | 145209555 | 5.05  |
| chr1 | 145210861 | 145211984 | 4.04  |
| chr1 | 145276884 | 145277883 | 3.36  |
| chr1 | 145288714 | 145294009 | 6.39  |
| chr1 | 145382533 | 145383556 | 4.04  |
| chr1 | 145394179 | 145400093 | 7.06  |
| chr1 | 145402711 | 145403650 | 3.7   |
| chr1 | 145417120 | 145418198 | 3.03  |
| chr1 | 145418420 | 145419156 | 1.68  |
| chr1 | 145420253 | 145421128 | 3.7   |
| chr1 | 145421509 | 145422535 | 4.71  |
| chr1 | 145424448 | 145425491 | 4.04  |
| chr1 | 145436601 | 145439660 | 4.71  |
| chr1 | 145440228 | 145441718 | 3.7   |
| chr1 | 145442376 | 145443501 | 3.03  |
| chr1 | 145448120 | 145450455 | 4.04  |
| chr1 | 145451170 | 145452533 | 4.04  |
| chr1 | 145454507 | 145455977 | 4.04  |
| chr1 | 145456255 | 145457726 | 4.04  |
| chr1 | 145459637 | 145460618 | 3.03  |
| chr1 | 145466894 | 145468502 | 5.72  |
| chr1 | 145469504 | 145472797 | 5.05  |
| chr1 | 145476639 | 145477767 | 3.7   |
| chr1 | 145482461 | 145483297 | 3.03  |
| chr1 | 145498325 | 145499552 | 4.37  |
| chr1 | 145503896 | 145504900 | 3.7   |

|      |           |           |       |
|------|-----------|-----------|-------|
| chr1 | 145514903 | 145516738 | 5.38  |
| chr1 | 145530990 | 145532062 | 4.04  |
| chr1 | 145542147 | 145544374 | 6.39  |
| chr1 | 145550428 | 145551444 | 3.36  |
| chr1 | 145555578 | 145557617 | 5.05  |
| chr1 | 145558436 | 145559535 | 3.7   |
| chr1 | 145561189 | 145562673 | 4.37  |
| chr1 | 145573564 | 145577480 | 5.72  |
| chr1 | 145579932 | 145581146 | 3.36  |
| chr1 | 145588884 | 145590812 | 5.38  |
| chr1 | 145610302 | 145611475 | 5.72  |
| chr1 | 145626124 | 145627453 | 6.05  |
| chr1 | 145636336 | 145639776 | 5.72  |
| chr1 | 145641841 | 145642618 | 3.36  |
| chr1 | 145668854 | 145669740 | 3.7   |
| chr1 | 145694147 | 145695116 | 3.03  |
| chr1 | 145696064 | 145697092 | 4.37  |
| chr1 | 145717801 | 145718704 | 4.04  |
| chr1 | 145720823 | 145721719 | 1.68  |
| chr1 | 145723066 | 145724999 | 5.05  |
| chr1 | 145726174 | 145729699 | 4.71  |
| chr1 | 145743759 | 145744611 | 4.04  |
| chr1 | 146529025 | 146530361 | 4.71  |
| chr1 | 146531133 | 146532739 | 4.37  |
| chr1 | 146534357 | 146535295 | 4.04  |
| chr1 | 146541688 | 146544051 | 3.7   |
| chr1 | 146555860 | 146558254 | 3.03  |
| chr1 | 146558996 | 146560544 | 3.7   |
| chr1 | 146568934 | 146570241 | 3.7   |
| chr1 | 146580830 | 146582730 | 4.37  |
| chr1 | 146591440 | 146592531 | 4.04  |
| chr1 | 146600865 | 146601817 | 4.04  |
| chr1 | 146642207 | 146645038 | 10.09 |
| chr1 | 146670574 | 146671992 | 3.7   |
| chr1 | 146696268 | 146698134 | 4.37  |
| chr1 | 146705679 | 146706573 | 3.7   |
| chr1 | 146707584 | 146710674 | 6.05  |
| chr1 | 146713633 | 146715422 | 4.37  |
| chr1 | 146760153 | 146761126 | 3.36  |
| chr1 | 146764949 | 146767470 | 4.37  |
| chr1 | 146768732 | 146770423 | 5.72  |
| chr1 | 146771518 | 146777968 | 6.05  |
| chr1 | 146784756 | 146788703 | 5.05  |

|      |           |           |      |
|------|-----------|-----------|------|
| chr1 | 146790562 | 146793624 | 4.37 |
| chr1 | 146805669 | 146806678 | 3.7  |
| chr1 | 146808335 | 146810370 | 5.05 |
| chr1 | 146811887 | 146813294 | 3.7  |
| chr1 | 146813759 | 146814656 | 4.04 |
| chr1 | 146828426 | 146831738 | 4.71 |
| chr1 | 146834967 | 146836073 | 4.37 |
| chr1 | 146842834 | 146845946 | 5.72 |
| chr1 | 146849179 | 146850065 | 3.03 |
| chr1 | 146866114 | 146867724 | 3.7  |
| chr1 | 146870123 | 146871372 | 5.05 |
| chr1 | 146880800 | 146887585 | 7.4  |
| chr1 | 146889193 | 146890345 | 4.04 |
| chr1 | 146891488 | 146892436 | 4.37 |
| chr1 | 146892696 | 146894487 | 3.7  |
| chr1 | 146900765 | 146902031 | 4.04 |
| chr1 | 146905247 | 146906488 | 4.37 |
| chr1 | 146907383 | 146911179 | 4.37 |
| chr1 | 146912536 | 146914723 | 5.72 |
| chr1 | 146915605 | 146921539 | 7.06 |
| chr1 | 146921984 | 146922940 | 4.71 |
| chr1 | 146923960 | 146924810 | 3.36 |
| chr1 | 146925970 | 146927257 | 4.37 |
| chr1 | 146929235 | 146931072 | 4.37 |
| chr1 | 146936295 | 146939968 | 5.72 |
| chr1 | 146940302 | 146941291 | 3.36 |
| chr1 | 146942721 | 146944890 | 4.37 |
| chr1 | 146949829 | 146951232 | 4.04 |
| chr1 | 146972125 | 146972994 | 3.03 |
| chr1 | 146986146 | 146988430 | 4.37 |
| chr1 | 146999161 | 147000307 | 3.7  |
| chr1 | 147012323 | 147013077 | 4.04 |
| chr1 | 147018111 | 147018925 | 3.7  |
| chr1 | 147039128 | 147040154 | 4.37 |
| chr1 | 147041191 | 147042222 | 3.7  |
| chr1 | 147070455 | 147072656 | 4.37 |
| chr1 | 147082930 | 147084956 | 5.38 |
| chr1 | 147109298 | 147110465 | 3.7  |
| chr1 | 147132339 | 147135135 | 4.04 |
| chr1 | 147135908 | 147137371 | 3.7  |
| chr1 | 147140729 | 147144560 | 5.72 |
| chr1 | 147145641 | 147152641 | 7.4  |
| chr1 | 147153288 | 147156224 | 5.72 |



|      |           |           |       |
|------|-----------|-----------|-------|
| chr1 | 147184109 | 147185192 | 3.7   |
| chr1 | 147185662 | 147194810 | 10.76 |
| chr1 | 147202729 | 147203453 | 3.36  |
| chr1 | 147210125 | 147211001 | 3.03  |
| chr1 | 147213386 | 147214850 | 3.03  |
| chr1 | 147219948 | 147220758 | 3.7   |
| chr1 | 147253101 | 147254742 | 4.04  |
| chr1 | 147259924 | 147261366 | 3.36  |
| chr1 | 147261875 | 147266010 | 4.71  |
| chr1 | 147269813 | 147271201 | 3.36  |
| chr1 | 147280705 | 147282202 | 3.7   |
| chr1 | 147292715 | 147293639 | 3.7   |
| chr1 | 147306725 | 147307818 | 3.36  |
| chr1 | 147312603 | 147313780 | 4.37  |
| chr1 | 147322658 | 147324010 | 4.37  |
| chr1 | 147333236 | 147334108 | 3.7   |
| chr1 | 147344144 | 147344963 | 4.04  |
| chr1 | 147350630 | 147351359 | 2.35  |
| chr1 | 147361478 | 147362474 | 4.04  |
| chr1 | 147364205 | 147365048 | 3.36  |
| chr1 | 147389118 | 147390190 | 4.37  |
| chr1 | 147735440 | 147736783 | 4.04  |
| chr1 | 147745811 | 147747234 | 3.7   |
| chr1 | 147767635 | 147769332 | 4.04  |
| chr1 | 147782439 | 147783760 | 4.37  |
| chr1 | 147788248 | 147789394 | 4.04  |
| chr1 | 147800526 | 147801814 | 3.7   |
| chr1 | 147806047 | 147807767 | 5.72  |
| chr1 | 147824047 | 147824959 | 3.36  |
| chr1 | 148556086 | 148557256 | 6.39  |
| chr1 | 148850716 | 148851961 | 3.03  |
| chr1 | 149034741 | 149035897 | 10.43 |
| chr1 | 149222192 | 149225660 | 6.39  |
| chr1 | 149684348 | 149685431 | 5.05  |
| chr1 | 149817785 | 149819044 | 5.05  |
| chr1 | 149819739 | 149821499 | 3.7   |
| chr1 | 149849688 | 149850598 | 4.04  |
| chr1 | 149855852 | 149861360 | 6.05  |
| chr1 | 149865291 | 149866956 | 4.04  |
| chr1 | 149871206 | 149872829 | 3.7   |
| chr1 | 149874961 | 149875792 | 2.69  |
| chr1 | 149898964 | 149900391 | 6.73  |
| chr1 | 149902142 | 149904651 | 4.37  |

|      |           |           |      |
|------|-----------|-----------|------|
| chr1 | 149908780 | 149911930 | 5.05 |
| chr1 | 149939015 | 149940019 | 3.36 |
| chr1 | 149960334 | 149961187 | 3.36 |
| chr1 | 149980245 | 149983144 | 5.38 |
| chr1 | 149989876 | 149990789 | 1.68 |
| chr1 | 150031505 | 150032746 | 3.36 |
| chr1 | 150038256 | 150040486 | 6.39 |
| chr1 | 150044647 | 150045590 | 3.7  |
| chr1 | 150126182 | 150127407 | 4.37 |
| chr1 | 150134317 | 150135093 | 2.69 |
| chr1 | 150140991 | 150142428 | 4.04 |
| chr1 | 150185493 | 150186742 | 3.7  |
| chr1 | 150205988 | 150208327 | 4.37 |
| chr1 | 150227577 | 150229036 | 4.04 |
| chr1 | 150240587 | 150242120 | 5.05 |
| chr1 | 150253275 | 150254634 | 4.04 |
| chr1 | 150265663 | 150266762 | 3.7  |
| chr1 | 150293451 | 150294769 | 4.37 |
| chr1 | 150306688 | 150307675 | 2.35 |
| chr1 | 150334438 | 150335354 | 3.36 |
| chr1 | 150335823 | 150339592 | 6.39 |
| chr1 | 150361641 | 150362561 | 4.37 |
| chr1 | 150364854 | 150365683 | 2.69 |
| chr1 | 150372292 | 150373381 | 3.7  |
| chr1 | 150377443 | 150378640 | 3.36 |
| chr1 | 150389514 | 150390514 | 3.7  |
| chr1 | 150445400 | 150446635 | 4.04 |
| chr1 | 150448416 | 150450364 | 4.04 |
| chr1 | 150458771 | 150460550 | 5.72 |
| chr1 | 150487426 | 150488752 | 3.7  |
| chr1 | 150504565 | 150506002 | 5.38 |
| chr1 | 150520885 | 150522299 | 4.37 |
| chr1 | 150523492 | 150524871 | 4.04 |
| chr1 | 150530208 | 150531119 | 3.36 |
| chr1 | 150533061 | 150535319 | 5.38 |
| chr1 | 150540162 | 150541487 | 4.04 |
| chr1 | 150547838 | 150548793 | 3.36 |
| chr1 | 150549310 | 150552866 | 5.05 |
| chr1 | 150559783 | 150560453 | 2.35 |
| chr1 | 150583574 | 150584675 | 3.03 |
| chr1 | 150591674 | 150593019 | 5.38 |
| chr1 | 150596128 | 150597358 | 4.04 |
| chr1 | 150600487 | 150601916 | 4.71 |

|      |           |           |      |
|------|-----------|-----------|------|
| chr1 | 150602655 | 150603804 | 4.71 |
| chr1 | 150622519 | 150623622 | 5.05 |
| chr1 | 150666667 | 150667690 | 3.36 |
| chr1 | 150736954 | 150738447 | 4.37 |
| chr1 | 150763310 | 150764122 | 3.7  |
| chr1 | 150769353 | 150770154 | 2.02 |
| chr1 | 150785125 | 150786484 | 3.7  |
| chr1 | 150824399 | 150825457 | 4.04 |
| chr1 | 150825720 | 150826843 | 4.37 |
| chr1 | 150847245 | 150850089 | 5.72 |
| chr1 | 150878486 | 150880243 | 5.38 |
| chr1 | 150881727 | 150882541 | 3.7  |
| chr1 | 150897792 | 150899630 | 4.71 |
| chr1 | 150904073 | 150905122 | 3.36 |
| chr1 | 150934986 | 150936477 | 3.36 |
| chr1 | 150943308 | 150944703 | 4.37 |
| chr1 | 150945489 | 150950249 | 5.05 |
| chr1 | 150951297 | 150952692 | 6.73 |
| chr1 | 150953243 | 150956241 | 6.39 |
| chr1 | 150977996 | 150979506 | 3.36 |
| chr1 | 150980435 | 150982803 | 4.37 |
| chr1 | 150996707 | 150997430 | 2.69 |
| chr1 | 151015578 | 151016558 | 3.03 |
| chr1 | 151019994 | 151023379 | 4.37 |
| chr1 | 151028770 | 151029705 | 3.36 |
| chr1 | 151030227 | 151033416 | 4.71 |
| chr1 | 151042397 | 151045031 | 7.74 |
| chr1 | 151094731 | 151095990 | 2.35 |
| chr1 | 151106316 | 151107562 | 4.04 |
| chr1 | 151117166 | 151118115 | 4.04 |
| chr1 | 151128257 | 151129405 | 4.37 |
| chr1 | 151137845 | 151139326 | 7.06 |
| chr1 | 151148150 | 151148872 | 2.69 |
| chr1 | 151159494 | 151161338 | 4.04 |
| chr1 | 151161961 | 151163360 | 6.39 |
| chr1 | 151168600 | 151172883 | 5.05 |
| chr1 | 151177002 | 151177809 | 3.03 |
| chr1 | 151215677 | 151216903 | 1.68 |
| chr1 | 151226569 | 151228613 | 4.71 |
| chr1 | 151246111 | 151247025 | 4.37 |
| chr1 | 151253459 | 151255819 | 4.71 |
| chr1 | 151282930 | 151284843 | 5.38 |
| chr1 | 151285922 | 151286864 | 3.03 |

|      |           |           |       |
|------|-----------|-----------|-------|
| chr1 | 151297609 | 151300932 | 4.04  |
| chr1 | 151318857 | 151320964 | 3.36  |
| chr1 | 151323067 | 151325871 | 6.05  |
| chr1 | 151329185 | 151330088 | 3.7   |
| chr1 | 151332970 | 151339160 | 13.12 |
| chr1 | 151343657 | 151346745 | 5.05  |
| chr1 | 151347256 | 151348224 | 4.37  |
| chr1 | 151353114 | 151353985 | 2.69  |
| chr1 | 151358445 | 151360154 | 4.71  |
| chr1 | 151364560 | 151365361 | 2.69  |
| chr1 | 151371314 | 151372856 | 3.7   |
| chr1 | 151373482 | 151375973 | 4.04  |
| chr1 | 151416232 | 151417124 | 4.04  |
| chr1 | 151429173 | 151432735 | 5.38  |
| chr1 | 151444450 | 151446662 | 5.05  |
| chr1 | 151454009 | 151455291 | 4.71  |
| chr1 | 151482958 | 151487069 | 6.05  |
| chr1 | 151491499 | 151492535 | 2.69  |
| chr1 | 151511608 | 151513982 | 5.72  |
| chr1 | 151518378 | 151522216 | 9.75  |
| chr1 | 151534487 | 151536194 | 3.7   |
| chr1 | 151541664 | 151543111 | 4.71  |
| chr1 | 151554055 | 151555365 | 4.37  |
| chr1 | 151556781 | 151558812 | 4.04  |
| chr1 | 151562081 | 151564076 | 4.04  |
| chr1 | 151568294 | 151569793 | 5.05  |
| chr1 | 151578456 | 151579839 | 6.05  |
| chr1 | 151583625 | 151585875 | 4.37  |
| chr1 | 151592143 | 151593022 | 4.04  |
| chr1 | 151644461 | 151645881 | 4.04  |
| chr1 | 151665809 | 151666654 | 2.69  |
| chr1 | 151688544 | 151691610 | 5.05  |
| chr1 | 151695799 | 151697344 | 4.71  |
| chr1 | 151700598 | 151701485 | 4.04  |
| chr1 | 151701827 | 151703031 | 4.71  |
| chr1 | 151704581 | 151706706 | 4.71  |
| chr1 | 151706948 | 151708249 | 6.39  |
| chr1 | 151709102 | 151711238 | 6.73  |
| chr1 | 151711743 | 151713580 | 4.71  |
| chr1 | 151716349 | 151717356 | 2.35  |
| chr1 | 151733358 | 151737101 | 5.05  |
| chr1 | 151751647 | 151752733 | 4.71  |
| chr1 | 151755683 | 151756890 | 4.37  |

|      |           |           |       |
|------|-----------|-----------|-------|
| chr1 | 151761977 | 151764636 | 5.38  |
| chr1 | 151768249 | 151770771 | 4.37  |
| chr1 | 151779933 | 151781119 | 5.05  |
| chr1 | 151791866 | 151793615 | 3.36  |
| chr1 | 151801933 | 151803926 | 4.37  |
| chr1 | 151804266 | 151805874 | 4.04  |
| chr1 | 151807803 | 151810130 | 4.37  |
| chr1 | 151811974 | 151812778 | 3.36  |
| chr1 | 151815256 | 151816289 | 3.03  |
| chr1 | 151820799 | 151822405 | 5.05  |
| chr1 | 151827836 | 151829187 | 4.37  |
| chr1 | 151829649 | 151831309 | 4.71  |
| chr1 | 151831651 | 151832607 | 3.03  |
| chr1 | 151833278 | 151834516 | 4.04  |
| chr1 | 151858143 | 151860808 | 5.05  |
| chr1 | 151871958 | 151873749 | 4.71  |
| chr1 | 151874922 | 151878587 | 4.04  |
| chr1 | 151879275 | 151882972 | 27.24 |
| chr1 | 151888666 | 151891027 | 3.36  |
| chr1 | 151894991 | 151898318 | 4.37  |
| chr1 | 151898753 | 151899709 | 4.04  |
| chr1 | 151905863 | 151907326 | 4.71  |
| chr1 | 151918143 | 151919883 | 4.37  |
| chr1 | 151922826 | 151923957 | 4.37  |
| chr1 | 151932718 | 151934092 | 4.71  |
| chr1 | 151938472 | 151941540 | 4.04  |
| chr1 | 151942828 | 151944013 | 5.05  |
| chr1 | 151944786 | 151946097 | 4.71  |
| chr1 | 151949922 | 151951648 | 5.38  |
| chr1 | 151960351 | 151972051 | 7.06  |
| chr1 | 151974025 | 151974842 | 3.7   |
| chr1 | 151975227 | 151977238 | 4.37  |
| chr1 | 151981659 | 151982640 | 3.7   |
| chr1 | 151985602 | 151987339 | 5.38  |
| chr1 | 151991478 | 151993661 | 3.36  |
| chr1 | 151994389 | 152000199 | 4.37  |
| chr1 | 152001297 | 152002767 | 4.04  |
| chr1 | 152005197 | 152009615 | 5.72  |
| chr1 | 152010541 | 152012796 | 4.04  |
| chr1 | 152013109 | 152014249 | 3.7   |
| chr1 | 152015868 | 152016759 | 4.04  |
| chr1 | 152017076 | 152019321 | 4.04  |
| chr1 | 152019585 | 152024669 | 7.4   |

|      |           |           |       |
|------|-----------|-----------|-------|
| chr1 | 152029727 | 152031059 | 4.04  |
| chr1 | 152032154 | 152034785 | 5.05  |
| chr1 | 152035850 | 152036957 | 4.04  |
| chr1 | 152039181 | 152040234 | 3.03  |
| chr1 | 152041153 | 152044047 | 3.7   |
| chr1 | 152044592 | 152046306 | 3.7   |
| chr1 | 152047632 | 152050623 | 5.05  |
| chr1 | 152057405 | 152060743 | 4.71  |
| chr1 | 152061109 | 152062271 | 4.37  |
| chr1 | 152062938 | 152065995 | 4.71  |
| chr1 | 152067979 | 152069410 | 5.05  |
| chr1 | 152071272 | 152072741 | 3.36  |
| chr1 | 152075898 | 152086275 | 9.08  |
| chr1 | 152087628 | 152090173 | 5.05  |
| chr1 | 152093472 | 152094978 | 3.36  |
| chr1 | 152103437 | 152107166 | 4.04  |
| chr1 | 152110268 | 152111235 | 3.7   |
| chr1 | 152112104 | 152113164 | 3.7   |
| chr1 | 152118100 | 152124225 | 13.79 |
| chr1 | 152125785 | 152127170 | 4.71  |
| chr1 | 152130444 | 152132117 | 4.04  |
| chr1 | 152143155 | 152144310 | 4.04  |
| chr1 | 152144789 | 152146269 | 3.7   |
| chr1 | 152148539 | 152149449 | 3.36  |
| chr1 | 152151772 | 152152907 | 3.36  |
| chr1 | 152157455 | 152158403 | 3.7   |
| chr1 | 152158991 | 152159852 | 3.7   |
| chr1 | 152160985 | 152162176 | 4.71  |
| chr1 | 152163394 | 152164261 | 3.7   |
| chr1 | 152165979 | 152167947 | 4.37  |
| chr1 | 152193682 | 152195004 | 4.37  |
| chr1 | 152212928 | 152213942 | 4.04  |
| chr1 | 152295824 | 152296684 | 1.68  |
| chr1 | 152302289 | 152304389 | 4.04  |
| chr1 | 152315221 | 152316145 | 3.03  |
| chr1 | 152320715 | 152321719 | 4.37  |
| chr1 | 152325807 | 152327398 | 4.37  |
| chr1 | 152329342 | 152330643 | 3.7   |
| chr1 | 152333058 | 152333956 | 3.36  |
| chr1 | 152336281 | 152337711 | 3.36  |
| chr1 | 152343755 | 152344547 | 3.7   |
| chr1 | 152353178 | 152353883 | 3.03  |
| chr1 | 152359252 | 152362252 | 3.7   |

|      |           |           |       |
|------|-----------|-----------|-------|
| chr1 | 152368191 | 152370244 | 3.7   |
| chr1 | 152371124 | 152372044 | 3.36  |
| chr1 | 152379585 | 152380743 | 3.7   |
| chr1 | 152387666 | 152388765 | 3.7   |
| chr1 | 152389637 | 152391444 | 4.04  |
| chr1 | 152396408 | 152397511 | 3.36  |
| chr1 | 152398048 | 152399227 | 4.37  |
| chr1 | 152402302 | 152403340 | 3.7   |
| chr1 | 152412863 | 152413986 | 3.7   |
| chr1 | 152423010 | 152424456 | 5.05  |
| chr1 | 152430381 | 152432059 | 4.04  |
| chr1 | 152432338 | 152433780 | 3.7   |
| chr1 | 152437828 | 152439703 | 3.7   |
| chr1 | 152441417 | 152442335 | 3.7   |
| chr1 | 152448429 | 152450695 | 4.37  |
| chr1 | 152898467 | 152899430 | 3.36  |
| chr1 | 153094809 | 153096080 | 6.73  |
| chr1 | 153443513 | 153445553 | 4.37  |
| chr1 | 153580429 | 153581841 | 4.04  |
| chr1 | 153680412 | 153681288 | 3.36  |
| chr1 | 153893575 | 153894331 | 1.68  |
| chr1 | 153918262 | 153919829 | 5.38  |
| chr1 | 153936018 | 153936925 | 3.7   |
| chr1 | 153939073 | 153940406 | 4.04  |
| chr1 | 153959322 | 153960261 | 3.7   |
| chr1 | 154267365 | 154269035 | 14.8  |
| chr1 | 154288096 | 154290221 | 10.43 |
| chr1 | 154530766 | 154531502 | 3.36  |
| chr1 | 154972741 | 154974415 | 6.73  |
| chr1 | 155098021 | 155100504 | 4.04  |
| chr1 | 155610907 | 155614040 | 10.09 |
| chr1 | 155661723 | 155662877 | 4.71  |
| chr1 | 156440991 | 156442044 | 4.71  |
| chr1 | 156470113 | 156471444 | 4.71  |
| chr1 | 156716128 | 156717795 | 4.04  |
| chr1 | 156990440 | 156992188 | 4.04  |
| chr1 | 158078761 | 158079564 | 4.37  |
| chr1 | 161052875 | 161054153 | 4.71  |
| chr1 | 161102268 | 161103277 | 3.36  |
| chr1 | 163291328 | 163292328 | 5.38  |
| chr1 | 164497124 | 164498439 | 5.05  |
| chr1 | 166689256 | 166691488 | 6.73  |
| chr1 | 166808069 | 166809740 | 4.04  |

|      |           |           |      |
|------|-----------|-----------|------|
| chr1 | 167291246 | 167292624 | 4.04 |
| chr1 | 168834517 | 168835860 | 4.71 |
| chr1 | 168837399 | 168838919 | 4.71 |
| chr1 | 168875818 | 168877138 | 4.04 |
| chr1 | 169074865 | 169077143 | 3.7  |
| chr1 | 169277284 | 169277987 | 3.7  |
| chr1 | 169278425 | 169279300 | 4.04 |
| chr1 | 169333883 | 169335215 | 4.71 |
| chr1 | 169375904 | 169376887 | 4.37 |
| chr1 | 169452956 | 169455297 | 3.36 |
| chr1 | 169497303 | 169498126 | 3.7  |
| chr1 | 169686189 | 169687043 | 3.36 |
| chr1 | 169763258 | 169764641 | 4.04 |
| chr1 | 169785598 | 169786806 | 4.71 |
| chr1 | 169862050 | 169863466 | 4.04 |
| chr1 | 170526253 | 170527776 | 4.37 |
| chr1 | 170570684 | 170571745 | 9.08 |
| chr1 | 170751530 | 170752326 | 1.01 |
| chr1 | 170844578 | 170845334 | 2.02 |
| chr1 | 170889500 | 170890821 | 3.36 |
| chr1 | 171269044 | 171270424 | 3.7  |
| chr1 | 171318351 | 171319659 | 5.05 |
| chr1 | 171348653 | 171349845 | 3.7  |
| chr1 | 171691882 | 171693151 | 6.39 |
| chr1 | 171710617 | 171711992 | 3.36 |
| chr1 | 171868578 | 171869376 | 1.68 |
| chr1 | 171886677 | 171887453 | 1.68 |
| chr1 | 172109537 | 172110307 | 1.01 |
| chr1 | 172335245 | 172336951 | 3.36 |
| chr1 | 172483513 | 172484802 | 4.04 |
| chr1 | 172499002 | 172499977 | 5.38 |
| chr1 | 172584403 | 172590755 | 8.07 |
| chr1 | 172591452 | 172593130 | 4.04 |
| chr1 | 172614065 | 172615046 | 3.7  |
| chr1 | 172698780 | 172699706 | 3.7  |
| chr1 | 172881285 | 172883069 | 5.05 |
| chr1 | 173174089 | 173174897 | 2.02 |
| chr1 | 173211951 | 173213225 | 4.71 |
| chr1 | 173321509 | 173322394 | 3.7  |
| chr1 | 173437758 | 173439113 | 3.7  |
| chr1 | 173439353 | 173440708 | 5.05 |
| chr1 | 173446844 | 173447648 | 3.36 |
| chr1 | 173465137 | 173467232 | 6.39 |



|      |           |           |       |
|------|-----------|-----------|-------|
| chr1 | 173644956 | 173646024 | 4.04  |
| chr1 | 173683315 | 173684699 | 5.05  |
| chr1 | 173836473 | 173838148 | 4.37  |
| chr1 | 174270094 | 174271541 | 5.38  |
| chr1 | 174283286 | 174285931 | 4.71  |
| chr1 | 174289607 | 174291798 | 6.39  |
| chr1 | 174500440 | 174501656 | 4.37  |
| chr1 | 175081876 | 175083102 | 4.04  |
| chr1 | 175262826 | 175264266 | 4.04  |
| chr1 | 175496502 | 175497682 | 2.35  |
| chr1 | 175879351 | 175881478 | 11.77 |
| chr1 | 175896538 | 175898068 | 7.06  |
| chr1 | 176067140 | 176068650 | 7.4   |
| chr1 | 176126332 | 176127921 | 5.72  |
| chr1 | 176175747 | 176176741 | 4.37  |
| chr1 | 177185320 | 177186794 | 3.36  |
| chr1 | 177270531 | 177271546 | 3.7   |
| chr1 | 177501199 | 177503765 | 6.73  |
| chr1 | 177538572 | 177539320 | 4.04  |
| chr1 | 177542725 | 177544140 | 4.04  |
| chr1 | 177692085 | 177693677 | 6.73  |
| chr1 | 177725871 | 177726827 | 3.03  |
| chr1 | 177841530 | 177842749 | 3.03  |
| chr1 | 177860307 | 177861660 | 6.39  |
| chr1 | 178062794 | 178064360 | 4.71  |
| chr1 | 178723123 | 178724300 | 4.37  |
| chr1 | 178726503 | 178727541 | 3.7   |
| chr1 | 178731077 | 178731927 | 3.03  |
| chr1 | 178732180 | 178734176 | 4.04  |
| chr1 | 178735478 | 178736545 | 4.37  |
| chr1 | 178737723 | 178738674 | 3.36  |
| chr1 | 178946054 | 178947118 | 5.05  |
| chr1 | 178947841 | 178950079 | 4.04  |
| chr1 | 179050333 | 179051690 | 4.71  |
| chr1 | 179443460 | 179444739 | 6.05  |
| chr1 | 179445119 | 179446567 | 5.38  |
| chr1 | 179446858 | 179448437 | 8.07  |
| chr1 | 179682660 | 179684709 | 5.38  |
| chr1 | 179688114 | 179689512 | 4.37  |
| chr1 | 179690469 | 179691459 | 3.7   |
| chr1 | 179697384 | 179698221 | 3.7   |
| chr1 | 179740802 | 179741631 | 2.02  |
| chr1 | 179851181 | 179852506 | 6.05  |

|      |           |           |      |
|------|-----------|-----------|------|
| chr1 | 179899080 | 179900277 | 4.71 |
| chr1 | 180348712 | 180352533 | 5.38 |
| chr1 | 180470893 | 180472474 | 4.37 |
| chr1 | 180626893 | 180627805 | 3.36 |
| chr1 | 180702340 | 180704475 | 6.39 |
| chr1 | 180850401 | 180851463 | 1.68 |
| chr1 | 180915059 | 180917768 | 4.37 |
| chr1 | 180919091 | 180920095 | 3.7  |
| chr1 | 180922299 | 180923457 | 4.37 |
| chr1 | 180928358 | 180929579 | 4.37 |
| chr1 | 180945088 | 180945971 | 2.35 |
| chr1 | 180972684 | 180974217 | 4.04 |
| chr1 | 180986534 | 180987665 | 3.7  |
| chr1 | 180990091 | 180992205 | 4.71 |
| chr1 | 180992623 | 180993518 | 4.04 |
| chr1 | 181052918 | 181054242 | 4.04 |
| chr1 | 181057062 | 181059840 | 5.72 |
| chr1 | 181073193 | 181076094 | 5.38 |
| chr1 | 181080830 | 181082476 | 9.75 |
| chr1 | 181085792 | 181089288 | 7.74 |
| chr1 | 181089752 | 181090645 | 3.36 |
| chr1 | 181103681 | 181104572 | 3.36 |
| chr1 | 181112181 | 181113249 | 3.36 |
| chr1 | 181118093 | 181118908 | 3.7  |
| chr1 | 181125996 | 181126923 | 3.36 |
| chr1 | 181131339 | 181133745 | 7.06 |
| chr1 | 181139435 | 181140922 | 3.7  |
| chr1 | 181141137 | 181143457 | 7.4  |
| chr1 | 181207260 | 181208732 | 3.36 |
| chr1 | 181214527 | 181216025 | 4.04 |
| chr1 | 181223895 | 181225280 | 5.05 |
| chr1 | 181253222 | 181255097 | 5.38 |
| chr1 | 181255833 | 181260406 | 5.05 |
| chr1 | 181272448 | 181273441 | 3.03 |
| chr1 | 181347356 | 181349178 | 3.7  |
| chr1 | 181352055 | 181353081 | 3.7  |
| chr1 | 181355529 | 181356372 | 2.35 |
| chr1 | 181359468 | 181360352 | 3.7  |
| chr1 | 181361616 | 181362812 | 4.71 |
| chr1 | 181372895 | 181375161 | 4.04 |
| chr1 | 181387894 | 181389565 | 4.04 |
| chr1 | 181425401 | 181427347 | 4.04 |
| chr1 | 181435749 | 181437139 | 4.04 |

|      |           |           |       |
|------|-----------|-----------|-------|
| chr1 | 181468654 | 181470808 | 4.37  |
| chr1 | 181499631 | 181500646 | 3.36  |
| chr1 | 182451628 | 182452700 | 1.01  |
| chr1 | 182501136 | 182501960 | 1.68  |
| chr1 | 182572199 | 182573215 | 4.37  |
| chr1 | 182629431 | 182630299 | 2.35  |
| chr1 | 182703528 | 182704442 | 1.35  |
| chr1 | 182931680 | 182932397 | 2.35  |
| chr1 | 182937989 | 182938951 | 3.7   |
| chr1 | 183018646 | 183019632 | 2.02  |
| chr1 | 183062631 | 183063572 | 2.35  |
| chr1 | 183064720 | 183065604 | 2.35  |
| chr1 | 183069475 | 183070352 | 2.02  |
| chr1 | 183072568 | 183073488 | 2.02  |
| chr1 | 183128963 | 183129826 | 4.71  |
| chr1 | 183203585 | 183204928 | 4.71  |
| chr1 | 183213608 | 183214609 | 2.35  |
| chr1 | 183250197 | 183251008 | 3.36  |
| chr1 | 183440395 | 183442527 | 4.71  |
| chr1 | 183752324 | 183753229 | 2.02  |
| chr1 | 183773971 | 183774783 | 3.7   |
| chr1 | 183874494 | 183875357 | 2.02  |
| chr1 | 184020302 | 184021500 | 3.7   |
| chr1 | 184254353 | 184257074 | 3.7   |
| chr1 | 184258534 | 184261633 | 13.45 |
| chr1 | 184263147 | 184264149 | 3.7   |
| chr1 | 184312507 | 184313515 | 3.7   |
| chr1 | 184322068 | 184323030 | 3.36  |
| chr1 | 184355381 | 184357818 | 4.37  |
| chr1 | 184442126 | 184444392 | 4.37  |
| chr1 | 184514432 | 184515450 | 4.37  |
| chr1 | 184592377 | 184593556 | 3.7   |
| chr1 | 184617601 | 184619017 | 4.37  |
| chr1 | 184650522 | 184651559 | 3.36  |
| chr1 | 184781187 | 184783692 | 8.41  |
| chr1 | 184943337 | 184944326 | 3.03  |
| chr1 | 185101501 | 185102406 | 3.36  |
| chr1 | 185285415 | 185287025 | 4.37  |
| chr1 | 185291657 | 185292619 | 3.7   |
| chr1 | 185486429 | 185488090 | 9.42  |
| chr1 | 185546909 | 185548364 | 7.74  |
| chr1 | 185548917 | 185550998 | 5.05  |
| chr1 | 185551759 | 185553750 | 4.71  |

|      |           |           |      |
|------|-----------|-----------|------|
| chr1 | 185554432 | 185555489 | 3.7  |
| chr1 | 185613162 | 185616223 | 4.37 |
| chr1 | 185767196 | 185768215 | 3.03 |
| chr1 | 185902570 | 185903540 | 2.02 |
| chr1 | 186046578 | 186047609 | 3.36 |
| chr1 | 186121219 | 186123540 | 4.04 |
| chr1 | 186124117 | 186124940 | 3.7  |
| chr1 | 186162422 | 186164307 | 5.38 |
| chr1 | 186193754 | 186195542 | 4.04 |
| chr1 | 186219328 | 186220763 | 4.37 |
| chr1 | 186344101 | 186345447 | 5.38 |
| chr1 | 186965191 | 186966734 | 4.37 |
| chr1 | 186976301 | 186978739 | 9.42 |
| chr1 | 187120182 | 187121405 | 4.71 |
| chr1 | 187147624 | 187148447 | 3.7  |
| chr1 | 187433121 | 187434392 | 2.69 |
| chr1 | 187811446 | 187813169 | 4.71 |
| chr1 | 187914568 | 187915603 | 3.7  |
| chr1 | 188006394 | 188007650 | 4.71 |
| chr1 | 188038362 | 188039690 | 4.37 |
| chr1 | 188150722 | 188152891 | 4.37 |
| chr1 | 188245870 | 188246659 | 3.7  |
| chr1 | 188675679 | 188676656 | 3.36 |
| chr1 | 188716375 | 188717402 | 3.36 |
| chr1 | 188737938 | 188741150 | 4.04 |
| chr1 | 188744470 | 188745774 | 5.05 |
| chr1 | 189237488 | 189239349 | 7.4  |
| chr1 | 189677401 | 189678212 | 3.7  |
| chr1 | 189877019 | 189877853 | 4.04 |
| chr1 | 190335799 | 190337173 | 4.37 |
| chr1 | 190642185 | 190644201 | 4.37 |
| chr1 | 190883910 | 190885832 | 6.39 |
| chr1 | 191096638 | 191098613 | 5.72 |
| chr1 | 191111341 | 191112440 | 4.04 |
| chr1 | 191119420 | 191120598 | 4.04 |
| chr1 | 191122019 | 191123027 | 5.72 |
| chr1 | 191127680 | 191129134 | 4.37 |
| chr1 | 191185547 | 191187898 | 5.38 |
| chr1 | 191224761 | 191225598 | 3.03 |
| chr1 | 191252470 | 191253931 | 3.7  |
| chr1 | 191259082 | 191260083 | 3.7  |
| chr1 | 191269492 | 191271676 | 4.04 |
| chr1 | 191347887 | 191348728 | 3.7  |

|      |           |           |       |
|------|-----------|-----------|-------|
| chr1 | 191350584 | 191351892 | 4.04  |
| chr1 | 191365715 | 191366782 | 3.36  |
| chr1 | 191395823 | 191397533 | 5.38  |
| chr1 | 191505650 | 191506982 | 5.72  |
| chr1 | 191743057 | 191743846 | 3.36  |
| chr1 | 191782198 | 191783532 | 5.05  |
| chr1 | 191831098 | 191832656 | 5.72  |
| chr1 | 191877396 | 191878698 | 4.37  |
| chr1 | 191897338 | 191898884 | 3.03  |
| chr1 | 191901314 | 191902693 | 6.05  |
| chr1 | 191950228 | 191951765 | 4.37  |
| chr1 | 192133661 | 192134950 | 5.72  |
| chr1 | 192137502 | 192138481 | 3.36  |
| chr1 | 192276259 | 192278281 | 5.38  |
| chr1 | 192399381 | 192400437 | 3.7   |
| chr1 | 192963129 | 192964078 | 3.7   |
| chr1 | 193090565 | 193091577 | 3.7   |
| chr1 | 193302331 | 193303209 | 3.7   |
| chr1 | 193401568 | 193403507 | 5.05  |
| chr1 | 193957533 | 193958895 | 3.7   |
| chr1 | 194857273 | 194858190 | 3.7   |
| chr1 | 194999061 | 195000172 | 3.36  |
| chr1 | 195206539 | 195207737 | 4.37  |
| chr1 | 195444122 | 195445077 | 3.36  |
| chr1 | 196504378 | 196506075 | 6.39  |
| chr1 | 196507323 | 196508170 | 4.04  |
| chr1 | 196597438 | 196599125 | 4.37  |
| chr1 | 196707289 | 196708621 | 6.05  |
| chr1 | 197022483 | 197023375 | 3.36  |
| chr1 | 197049851 | 197051190 | 5.38  |
| chr1 | 197175735 | 197177266 | 6.05  |
| chr1 | 197569907 | 197570716 | 1.68  |
| chr1 | 197652805 | 197653667 | 3.03  |
| chr1 | 197693275 | 197695303 | 13.45 |
| chr1 | 197765795 | 197767286 | 4.37  |
| chr1 | 197768376 | 197771558 | 5.72  |
| chr1 | 197832483 | 197833276 | 2.02  |
| chr1 | 197845984 | 197846905 | 3.7   |
| chr1 | 198076035 | 198077213 | 4.71  |
| chr1 | 198125255 | 198126835 | 4.71  |
| chr1 | 198182627 | 198185653 | 4.37  |
| chr1 | 198288411 | 198289232 | 1.35  |
| chr1 | 198746689 | 198747598 | 2.69  |

|      |           |           |      |
|------|-----------|-----------|------|
| chr1 | 198761009 | 198761835 | 1.68 |
| chr1 | 198782259 | 198783423 | 4.71 |
| chr1 | 198798881 | 198799748 | 2.35 |
| chr1 | 198905227 | 198906512 | 4.04 |
| chr1 | 198907838 | 198909328 | 6.05 |
| chr1 | 198917350 | 198918167 | 4.04 |
| chr1 | 198927197 | 198929469 | 4.04 |
| chr1 | 199072976 | 199073889 | 3.7  |
| chr1 | 199091762 | 199092676 | 2.02 |
| chr1 | 199501464 | 199503724 | 5.38 |
| chr1 | 199677413 | 199678390 | 4.04 |
| chr1 | 199715813 | 199716766 | 3.36 |
| chr1 | 199734731 | 199736619 | 5.05 |
| chr1 | 199787095 | 199788112 | 2.02 |
| chr1 | 199816725 | 199817873 | 2.69 |
| chr1 | 199869702 | 199871115 | 3.7  |
| chr1 | 200007902 | 200009519 | 3.7  |
| chr1 | 200059534 | 200060589 | 3.36 |
| chr1 | 200099319 | 200100446 | 4.04 |
| chr1 | 200119652 | 200120786 | 4.37 |
| chr1 | 200152779 | 200153984 | 3.7  |
| chr1 | 200233608 | 200234530 | 3.36 |
| chr1 | 200340558 | 200341477 | 3.7  |
| chr1 | 200392107 | 200393126 | 3.36 |
| chr1 | 200446523 | 200447845 | 5.38 |
| chr1 | 200583908 | 200584833 | 3.7  |
| chr1 | 200589822 | 200591051 | 4.04 |
| chr1 | 200637847 | 200639978 | 4.04 |
| chr1 | 200706964 | 200707921 | 2.69 |
| chr1 | 200827655 | 200828729 | 3.36 |
| chr1 | 200829425 | 200830229 | 2.02 |
| chr1 | 200861670 | 200862838 | 4.04 |
| chr1 | 200876657 | 200878496 | 6.05 |
| chr1 | 200888087 | 200889035 | 2.69 |
| chr1 | 200915694 | 200917731 | 5.72 |
| chr1 | 200939131 | 200940121 | 2.35 |
| chr1 | 200976828 | 200978002 | 2.35 |
| chr1 | 200984866 | 200986017 | 2.02 |
| chr1 | 201007915 | 201008735 | 2.35 |
| chr1 | 201067506 | 201068259 | 1.68 |
| chr1 | 201082687 | 201084472 | 4.04 |
| chr1 | 201085455 | 201086404 | 3.03 |
| chr1 | 201094908 | 201096921 | 3.7  |

|      |           |           |      |
|------|-----------|-----------|------|
| chr1 | 201139013 | 201141161 | 4.04 |
| chr1 | 201142527 | 201143356 | 5.05 |
| chr1 | 201153137 | 201154042 | 3.36 |
| chr1 | 201190206 | 201191122 | 2.69 |
| chr1 | 201191409 | 201192426 | 2.69 |
| chr1 | 201228589 | 201229497 | 3.03 |
| chr1 | 201231001 | 201232471 | 4.37 |
| chr1 | 201238008 | 201238758 | 3.36 |
| chr1 | 201243777 | 201245144 | 4.71 |
| chr1 | 201251075 | 201252994 | 3.7  |
| chr1 | 201254524 | 201255786 | 5.05 |
| chr1 | 201276342 | 201279306 | 7.4  |
| chr1 | 201349643 | 201350946 | 4.37 |
| chr1 | 201368108 | 201369411 | 4.71 |
| chr1 | 201404561 | 201405638 | 4.04 |
| chr1 | 201424236 | 201425426 | 3.7  |
| chr1 | 201429193 | 201431500 | 6.39 |
| chr1 | 201436672 | 201439468 | 4.71 |
| chr1 | 201451042 | 201452198 | 4.71 |
| chr1 | 201462151 | 201463144 | 3.7  |
| chr1 | 201486488 | 201487716 | 6.39 |
| chr1 | 201499442 | 201500859 | 3.7  |
| chr1 | 201502657 | 201503514 | 3.7  |
| chr1 | 201505927 | 201508979 | 4.37 |
| chr1 | 201551621 | 201552951 | 2.69 |
| chr1 | 201563124 | 201566096 | 4.71 |
| chr1 | 201566456 | 201567754 | 3.7  |
| chr1 | 201580127 | 201581264 | 3.03 |
| chr1 | 201614663 | 201615633 | 3.36 |
| chr1 | 201617862 | 201620081 | 4.37 |
| chr1 | 201662818 | 201663568 | 1.68 |
| chr1 | 201708105 | 201709589 | 3.7  |
| chr1 | 201721882 | 201723553 | 3.7  |
| chr1 | 201986500 | 201988763 | 5.05 |
| chr1 | 201991292 | 201993134 | 6.39 |
| chr1 | 201997980 | 201998904 | 3.7  |
| chr1 | 202003406 | 202004616 | 5.38 |
| chr1 | 202014860 | 202017634 | 7.74 |
| chr1 | 202025603 | 202026899 | 5.72 |
| chr1 | 202027156 | 202028350 | 3.7  |
| chr1 | 202053642 | 202056845 | 4.71 |
| chr1 | 202078292 | 202079426 | 2.69 |
| chr1 | 202081958 | 202083208 | 3.36 |

|      |           |           |      |
|------|-----------|-----------|------|
| chr1 | 202100980 | 202102837 | 5.72 |
| chr1 | 202103713 | 202104660 | 4.04 |
| chr1 | 202112897 | 202114010 | 4.04 |
| chr1 | 202168799 | 202170933 | 4.04 |
| chr1 | 202184959 | 202185868 | 2.69 |
| chr1 | 202204379 | 202205965 | 4.37 |
| chr1 | 202221291 | 202222408 | 2.35 |
| chr1 | 202237581 | 202238611 | 4.04 |
| chr1 | 202244024 | 202246193 | 4.04 |
| chr1 | 202269091 | 202270037 | 3.03 |
| chr1 | 202278206 | 202279139 | 3.36 |
| chr1 | 202348968 | 202349737 | 3.36 |
| chr1 | 202537891 | 202538811 | 3.7  |
| chr1 | 202553294 | 202554116 | 2.69 |
| chr1 | 202556428 | 202557492 | 4.04 |
| chr1 | 202573311 | 202574180 | 2.35 |
| chr1 | 202614520 | 202615244 | 2.35 |
| chr1 | 202622965 | 202623684 | 2.35 |
| chr1 | 202661737 | 202663734 | 5.38 |
| chr1 | 202774683 | 202778486 | 5.72 |
| chr1 | 202779426 | 202782152 | 5.38 |
| chr1 | 202829567 | 202830554 | 4.04 |
| chr1 | 202856862 | 202858662 | 4.04 |
| chr1 | 202895707 | 202897024 | 4.71 |
| chr1 | 202957709 | 202958504 | 3.03 |
| chr1 | 202968137 | 202969277 | 3.7  |
| chr1 | 202975855 | 202977739 | 5.05 |
| chr1 | 202995001 | 202995839 | 2.35 |
| chr1 | 202999677 | 203000655 | 2.35 |
| chr1 | 203015996 | 203017037 | 2.69 |
| chr1 | 203050894 | 203051709 | 3.36 |
| chr1 | 203063829 | 203064842 | 3.7  |
| chr1 | 203065276 | 203066737 | 4.37 |
| chr1 | 203096391 | 203097830 | 4.04 |
| chr1 | 203098122 | 203099651 | 4.04 |
| chr1 | 203166121 | 203167068 | 2.69 |
| chr1 | 203188621 | 203189819 | 4.37 |
| chr1 | 203201566 | 203206467 | 6.05 |
| chr1 | 203215947 | 203216781 | 1.68 |
| chr1 | 203241751 | 203243189 | 4.71 |
| chr1 | 203249683 | 203251008 | 4.71 |
| chr1 | 203263914 | 203265183 | 4.04 |
| chr1 | 203269317 | 203270296 | 2.35 |



|      |           |           |       |
|------|-----------|-----------|-------|
| chr1 | 203273654 | 203276317 | 4.71  |
| chr1 | 203279168 | 203280045 | 3.7   |
| chr1 | 203285209 | 203287300 | 5.05  |
| chr1 | 203296038 | 203298063 | 4.37  |
| chr1 | 203372067 | 203373212 | 3.36  |
| chr1 | 203377700 | 203380169 | 4.37  |
| chr1 | 203449453 | 203450519 | 3.7   |
| chr1 | 203471398 | 203472239 | 2.69  |
| chr1 | 203473600 | 203474426 | 3.7   |
| chr1 | 203485183 | 203486996 | 2.35  |
| chr1 | 203534224 | 203535359 | 4.04  |
| chr1 | 203553290 | 203554251 | 2.02  |
| chr1 | 203562284 | 203563372 | 3.36  |
| chr1 | 203613507 | 203614458 | 2.35  |
| chr1 | 203641415 | 203642334 | 1.68  |
| chr1 | 203662224 | 203663267 | 4.37  |
| chr1 | 203732937 | 203734000 | 3.7   |
| chr1 | 203863134 | 203864641 | 6.39  |
| chr1 | 203898671 | 203899618 | 4.71  |
| chr1 | 203900788 | 203902248 | 3.7   |
| chr1 | 203909670 | 203910835 | 4.04  |
| chr1 | 203922180 | 203925723 | 5.38  |
| chr1 | 203929009 | 203931664 | 4.71  |
| chr1 | 203932535 | 203940169 | 18.84 |
| chr1 | 203943207 | 203944113 | 3.7   |
| chr1 | 204041818 | 204043226 | 3.7   |
| chr1 | 204043500 | 204044785 | 4.71  |
| chr1 | 204071304 | 204074670 | 5.72  |
| chr1 | 204099708 | 204101046 | 3.7   |
| chr1 | 204113582 | 204114671 | 3.03  |
| chr1 | 204117621 | 204118871 | 5.05  |
| chr1 | 204138437 | 204139828 | 4.04  |
| chr1 | 204140540 | 204141605 | 3.36  |
| chr1 | 204148858 | 204150025 | 2.35  |
| chr1 | 204151936 | 204152713 | 2.69  |
| chr1 | 204182635 | 204184043 | 5.38  |
| chr1 | 204184657 | 204185477 | 1.68  |
| chr1 | 204195137 | 204196395 | 4.37  |
| chr1 | 204222817 | 204223609 | 4.04  |
| chr1 | 204224440 | 204225284 | 2.02  |
| chr1 | 204254648 | 204257885 | 6.39  |
| chr1 | 204269778 | 204271369 | 3.36  |
| chr1 | 204273800 | 204274653 | 2.35  |

|      |           |           |      |
|------|-----------|-----------|------|
| chr1 | 204275940 | 204277554 | 6.05 |
| chr1 | 204308436 | 204309274 | 1.68 |
| chr1 | 204322483 | 204323347 | 2.69 |
| chr1 | 204331445 | 204333374 | 4.04 |
| chr1 | 204346859 | 204348794 | 4.37 |
| chr1 | 204349273 | 204350677 | 3.7  |
| chr1 | 204367137 | 204368371 | 5.05 |
| chr1 | 204379142 | 204380150 | 3.7  |
| chr1 | 204386014 | 204387224 | 5.38 |
| chr1 | 204401314 | 204402265 | 3.36 |
| chr1 | 204407390 | 204408246 | 3.36 |
| chr1 | 204411952 | 204413254 | 7.06 |
| chr1 | 204448448 | 204449506 | 4.04 |
| chr1 | 204462623 | 204464860 | 4.37 |
| chr1 | 204475226 | 204477001 | 4.37 |
| chr1 | 204484927 | 204486356 | 5.72 |
| chr1 | 204492298 | 204493594 | 4.71 |
| chr1 | 204533778 | 204536006 | 3.7  |
| chr1 | 204541763 | 204543666 | 4.04 |
| chr1 | 204560448 | 204562008 | 3.36 |
| chr1 | 204567260 | 204568302 | 2.02 |
| chr1 | 204578484 | 204579403 | 2.35 |
| chr1 | 204592099 | 204593166 | 3.7  |
| chr1 | 204615959 | 204617574 | 4.37 |
| chr1 | 204653798 | 204655442 | 4.04 |
| chr1 | 204688844 | 204689665 | 3.7  |
| chr1 | 204694404 | 204695084 | 4.37 |
| chr1 | 204705251 | 204707080 | 4.71 |
| chr1 | 204709118 | 204710078 | 3.7  |
| chr1 | 204720283 | 204721648 | 3.36 |
| chr1 | 204752252 | 204753148 | 3.03 |
| chr1 | 204767744 | 204768602 | 2.35 |
| chr1 | 204775768 | 204777115 | 4.37 |
| chr1 | 204810411 | 204811367 | 3.7  |
| chr1 | 204815543 | 204816351 | 3.36 |
| chr1 | 204865956 | 204866793 | 2.02 |
| chr1 | 204916198 | 204917090 | 1.68 |
| chr1 | 204918303 | 204919312 | 2.35 |
| chr1 | 204925308 | 204926507 | 3.7  |
| chr1 | 204958373 | 204959531 | 2.69 |
| chr1 | 204972735 | 204973550 | 3.7  |
| chr1 | 204983509 | 204984353 | 2.35 |
| chr1 | 204989243 | 204990360 | 2.35 |

|      |           |           |      |
|------|-----------|-----------|------|
| chr1 | 205012369 | 205014207 | 2.35 |
| chr1 | 205021545 | 205022729 | 2.35 |
| chr1 | 205090654 | 205092187 | 7.74 |
| chr1 | 205124378 | 205125821 | 8.75 |
| chr1 | 205126796 | 205127629 | 4.04 |
| chr1 | 205179447 | 205181567 | 5.72 |
| chr1 | 205286056 | 205289148 | 3.7  |
| chr1 | 205290121 | 205291412 | 3.7  |
| chr1 | 205298969 | 205300133 | 4.04 |
| chr1 | 205304274 | 205305878 | 5.05 |
| chr1 | 205307443 | 205308412 | 3.36 |
| chr1 | 205342820 | 205343707 | 3.36 |
| chr1 | 205421558 | 205422458 | 3.7  |
| chr1 | 205422873 | 205423614 | 2.35 |
| chr1 | 205424181 | 205425236 | 2.35 |
| chr1 | 205425829 | 205427233 | 2.35 |
| chr1 | 205427457 | 205428794 | 4.37 |
| chr1 | 205443329 | 205445841 | 4.37 |
| chr1 | 205446472 | 205447243 | 3.7  |
| chr1 | 205454889 | 205455746 | 4.04 |
| chr1 | 205462096 | 205463503 | 3.36 |
| chr1 | 205472875 | 205475410 | 5.38 |
| chr1 | 205485008 | 205485818 | 3.36 |
| chr1 | 205486377 | 205487270 | 3.36 |
| chr1 | 205510149 | 205511595 | 4.37 |
| chr1 | 205534507 | 205535483 | 4.04 |
| chr1 | 205540268 | 205541085 | 3.36 |
| chr1 | 205544204 | 205545095 | 4.71 |
| chr1 | 205560597 | 205561605 | 3.7  |
| chr1 | 205577298 | 205578225 | 2.69 |
| chr1 | 205600260 | 205601914 | 4.04 |
| chr1 | 205632977 | 205634362 | 5.72 |
| chr1 | 205645564 | 205646640 | 3.7  |
| chr1 | 205683718 | 205685064 | 4.37 |
| chr1 | 205716705 | 205717512 | 3.7  |
| chr1 | 205718061 | 205720470 | 5.05 |
| chr1 | 205722477 | 205723280 | 1.68 |
| chr1 | 205779252 | 205780189 | 3.36 |
| chr1 | 205780944 | 205782959 | 4.71 |
| chr1 | 205829850 | 205831502 | 4.71 |
| chr1 | 205847752 | 205848584 | 3.03 |
| chr1 | 205849010 | 205850578 | 4.71 |
| chr1 | 205857532 | 205858273 | 3.36 |

|      |           |           |       |
|------|-----------|-----------|-------|
| chr1 | 205865998 | 205867507 | 3.7   |
| chr1 | 205882104 | 205883739 | 3.7   |
| chr1 | 206217979 | 206219012 | 4.71  |
| chr1 | 206219263 | 206221255 | 4.37  |
| chr1 | 206231853 | 206232707 | 2.35  |
| chr1 | 206263444 | 206264215 | 2.02  |
| chr1 | 206278017 | 206278811 | 3.36  |
| chr1 | 206329710 | 206330573 | 3.36  |
| chr1 | 206595949 | 206597072 | 2.35  |
| chr1 | 206676867 | 206677801 | 3.03  |
| chr1 | 206679579 | 206683051 | 3.03  |
| chr1 | 206686740 | 206687616 | 2.69  |
| chr1 | 206711404 | 206712208 | 2.35  |
| chr1 | 206731386 | 206732330 | 3.7   |
| chr1 | 206759648 | 206761629 | 6.73  |
| chr1 | 206785002 | 206786528 | 10.09 |
| chr1 | 206807089 | 206808539 | 5.38  |
| chr1 | 206841907 | 206842825 | 4.04  |
| chr1 | 206860774 | 206861690 | 3.03  |
| chr1 | 206887066 | 206888864 | 5.05  |
| chr1 | 206919145 | 206919983 | 2.35  |
| chr1 | 206923066 | 206924015 | 3.36  |
| chr1 | 206951039 | 206951969 | 3.36  |
| chr1 | 206984762 | 206986843 | 4.04  |
| chr1 | 207013085 | 207013878 | 3.03  |
| chr1 | 207039536 | 207040484 | 3.36  |
| chr1 | 207041190 | 207042094 | 3.03  |
| chr1 | 207050340 | 207052957 | 12.11 |
| chr1 | 207068387 | 207069713 | 4.04  |
| chr1 | 207074819 | 207076182 | 3.36  |
| chr1 | 207082168 | 207083312 | 4.37  |
| chr1 | 207089370 | 207090197 | 3.36  |
| chr1 | 207128869 | 207129617 | 1.35  |
| chr1 | 207197773 | 207199298 | 3.03  |
| chr1 | 207206057 | 207206958 | 4.04  |
| chr1 | 207225857 | 207226902 | 4.04  |
| chr1 | 207301481 | 207303433 | 4.04  |
| chr1 | 207325052 | 207326131 | 2.02  |
| chr1 | 207406711 | 207407771 | 5.05  |
| chr1 | 207414386 | 207415319 | 4.04  |
| chr1 | 207427247 | 207428148 | 3.7   |
| chr1 | 207458064 | 207458916 | 3.7   |
| chr1 | 207470032 | 207471019 | 3.36  |

|      |           |           |      |
|------|-----------|-----------|------|
| chr1 | 207471478 | 207473011 | 3.36 |
| chr1 | 207475903 | 207476919 | 4.37 |
| chr1 | 207481387 | 207482229 | 2.69 |
| chr1 | 207489136 | 207490814 | 4.71 |
| chr1 | 207494116 | 207495863 | 5.72 |
| chr1 | 207536626 | 207537397 | 3.03 |
| chr1 | 207570534 | 207571570 | 3.7  |
| chr1 | 207670905 | 207671921 | 4.04 |
| chr1 | 209368966 | 209370104 | 4.37 |
| chr1 | 212998782 | 212999923 | 5.38 |
| chr1 | 214833865 | 214834971 | 5.38 |
| chr1 | 214851350 | 214852156 | 4.04 |
| chr1 | 214870409 | 214871326 | 4.37 |
| chr1 | 214888998 | 214889829 | 3.7  |
| chr1 | 214891420 | 214892389 | 3.03 |
| chr1 | 214929526 | 214933451 | 6.05 |
| chr1 | 214933683 | 214939376 | 6.05 |
| chr1 | 214989222 | 214990202 | 3.7  |
| chr1 | 215024145 | 215025724 | 4.04 |
| chr1 | 215037833 | 215038732 | 3.03 |
| chr1 | 215111913 | 215112942 | 3.36 |
| chr1 | 215118161 | 215119493 | 3.7  |
| chr1 | 215129992 | 215131093 | 4.04 |
| chr1 | 215142320 | 215143698 | 4.71 |
| chr1 | 215150367 | 215151941 | 4.37 |
| chr1 | 215167826 | 215168595 | 4.04 |
| chr1 | 215174559 | 215177712 | 3.36 |
| chr1 | 215178111 | 215179713 | 4.04 |
| chr1 | 215189794 | 215191046 | 4.71 |
| chr1 | 215196589 | 215197838 | 4.37 |
| chr1 | 215246310 | 215247064 | 4.37 |
| chr1 | 215253058 | 215254789 | 4.37 |
| chr1 | 215314515 | 215316291 | 5.38 |
| chr1 | 215319013 | 215319950 | 3.36 |
| chr1 | 215330345 | 215331715 | 4.04 |
| chr1 | 215352837 | 215358195 | 7.4  |
| chr1 | 215393511 | 215394583 | 4.37 |
| chr1 | 215418237 | 215419673 | 4.04 |
| chr1 | 215421640 | 215422428 | 4.37 |
| chr1 | 215431068 | 215432576 | 4.71 |
| chr1 | 215436189 | 215437209 | 4.04 |
| chr1 | 215441164 | 215442227 | 3.36 |
| chr1 | 215467217 | 215468718 | 4.04 |

|      |           |           |       |
|------|-----------|-----------|-------|
| chr1 | 215470590 | 215471793 | 3.7   |
| chr1 | 215478665 | 215479825 | 4.71  |
| chr1 | 215489224 | 215490979 | 4.37  |
| chr1 | 215492417 | 215494706 | 4.37  |
| chr1 | 215495818 | 215500366 | 10.43 |
| chr1 | 215512283 | 215513659 | 3.7   |
| chr1 | 215519916 | 215521775 | 4.04  |
| chr1 | 215524894 | 215526011 | 4.04  |
| chr1 | 215534807 | 215535715 | 3.7   |
| chr1 | 215541608 | 215543031 | 3.36  |
| chr1 | 215546750 | 215548222 | 3.36  |
| chr1 | 215555748 | 215557209 | 5.05  |
| chr1 | 215558662 | 215559527 | 4.04  |
| chr1 | 215570573 | 215572123 | 3.7   |
| chr1 | 215574079 | 215575281 | 4.71  |
| chr1 | 215581066 | 215581912 | 3.36  |
| chr1 | 215590774 | 215593104 | 4.71  |
| chr1 | 215599150 | 215600291 | 3.7   |
| chr1 | 215611000 | 215615066 | 7.4   |
| chr1 | 215626475 | 215627700 | 4.04  |
| chr1 | 215629729 | 215633112 | 4.71  |
| chr1 | 215640288 | 215641200 | 4.37  |
| chr1 | 215646831 | 215647632 | 3.7   |
| chr1 | 215648535 | 215654629 | 5.05  |
| chr1 | 215654868 | 215656855 | 5.05  |
| chr1 | 215660845 | 215663870 | 4.37  |
| chr1 | 215664527 | 215669759 | 5.05  |
| chr1 | 215674850 | 215676844 | 5.38  |
| chr1 | 215677502 | 215678996 | 3.36  |
| chr1 | 215681260 | 215688926 | 5.72  |
| chr1 | 215690634 | 215692456 | 3.7   |
| chr1 | 215704491 | 215706134 | 4.37  |
| chr1 | 215711711 | 215715799 | 4.04  |
| chr1 | 215716595 | 215717419 | 4.04  |
| chr1 | 215717743 | 215718685 | 4.04  |
| chr1 | 215739801 | 215741866 | 4.37  |
| chr1 | 215756622 | 215759146 | 5.72  |
| chr1 | 215772611 | 215773792 | 4.04  |
| chr1 | 215807437 | 215808843 | 4.04  |
| chr1 | 215809423 | 215810318 | 4.37  |
| chr1 | 215826419 | 215827344 | 3.36  |
| chr1 | 215955015 | 215956181 | 4.37  |
| chr1 | 215960537 | 215961475 | 3.36  |

|      |           |           |      |
|------|-----------|-----------|------|
| chr1 | 215964113 | 215965133 | 3.7  |
| chr1 | 215984329 | 215987202 | 7.74 |
| chr1 | 216027529 | 216028817 | 4.04 |
| chr1 | 216118661 | 216120274 | 3.7  |
| chr1 | 216458004 | 216459122 | 4.71 |
| chr1 | 216773617 | 216775098 | 4.37 |
| chr1 | 216794901 | 216795959 | 3.7  |
| chr1 | 216882949 | 216884295 | 3.36 |
| chr1 | 216884604 | 216885492 | 1.68 |
| chr1 | 216901982 | 216902795 | 3.7  |
| chr1 | 216938364 | 216940541 | 4.04 |
| chr1 | 216959695 | 216960818 | 3.7  |
| chr1 | 216987062 | 216988462 | 3.36 |
| chr1 | 216995497 | 216996540 | 3.36 |
| chr1 | 217001087 | 217001849 | 3.36 |
| chr1 | 217006434 | 217007409 | 3.36 |
| chr1 | 217027455 | 217028556 | 3.7  |
| chr1 | 217078577 | 217079588 | 3.36 |
| chr1 | 217093708 | 217094735 | 3.36 |
| chr1 | 217097119 | 217098280 | 3.36 |
| chr1 | 217140750 | 217141818 | 3.36 |
| chr1 | 217181647 | 217182492 | 4.37 |
| chr1 | 217202123 | 217205743 | 5.05 |
| chr1 | 217211656 | 217214543 | 4.37 |
| chr1 | 217291560 | 217295997 | 4.71 |
| chr1 | 217297087 | 217299921 | 4.37 |
| chr1 | 217302464 | 217303667 | 3.36 |
| chr1 | 217321599 | 217323965 | 4.04 |
| chr1 | 217346748 | 217347630 | 3.36 |
| chr1 | 217357272 | 217358349 | 3.03 |
| chr1 | 217359424 | 217360879 | 5.05 |
| chr1 | 217361445 | 217363132 | 3.03 |
| chr1 | 217367451 | 217368291 | 3.36 |
| chr1 | 217389767 | 217390652 | 3.36 |
| chr1 | 217413518 | 217414487 | 3.7  |
| chr1 | 217414874 | 217415982 | 4.04 |
| chr1 | 217417093 | 217418280 | 4.37 |
| chr1 | 217484784 | 217486750 | 4.04 |
| chr1 | 217487438 | 217490213 | 4.04 |
| chr1 | 217491382 | 217492257 | 3.36 |
| chr1 | 217502477 | 217506606 | 8.41 |
| chr1 | 217518736 | 217519737 | 3.7  |
| chr1 | 217524951 | 217525923 | 3.36 |

|      |           |           |      |
|------|-----------|-----------|------|
| chr1 | 217529067 | 217530113 | 3.7  |
| chr1 | 217544442 | 217553787 | 8.75 |
| chr1 | 217559612 | 217561627 | 5.72 |
| chr1 | 217577857 | 217578936 | 3.36 |
| chr1 | 217595183 | 217596539 | 3.36 |
| chr1 | 217652767 | 217654509 | 3.7  |
| chr1 | 217666323 | 217667380 | 4.37 |
| chr1 | 217730607 | 217731659 | 3.36 |
| chr1 | 217734479 | 217735593 | 3.7  |
| chr1 | 217736087 | 217737152 | 3.36 |
| chr1 | 217747247 | 217748954 | 4.04 |
| chr1 | 217780916 | 217782321 | 4.04 |
| chr1 | 217803804 | 217805327 | 4.71 |
| chr1 | 217833698 | 217835073 | 3.7  |
| chr1 | 217846164 | 217847092 | 3.03 |
| chr1 | 217848324 | 217849448 | 4.04 |
| chr1 | 217872760 | 217873677 | 3.7  |
| chr1 | 217881636 | 217883642 | 4.04 |
| chr1 | 217885824 | 217887231 | 4.37 |
| chr1 | 217901968 | 217902792 | 3.7  |
| chr1 | 217918212 | 217919681 | 3.03 |
| chr1 | 217954516 | 217955679 | 4.04 |
| chr1 | 217986696 | 217987597 | 2.69 |
| chr1 | 217990407 | 217991422 | 3.36 |
| chr1 | 218035101 | 218036103 | 3.7  |
| chr1 | 218040725 | 218041758 | 3.03 |
| chr1 | 218043818 | 218045108 | 3.7  |
| chr1 | 218104918 | 218105930 | 3.36 |
| chr1 | 218126042 | 218127927 | 4.71 |
| chr1 | 218139232 | 218143995 | 6.39 |
| chr1 | 218194291 | 218195710 | 5.72 |
| chr1 | 218237565 | 218239240 | 3.7  |
| chr1 | 218305888 | 218307114 | 4.71 |
| chr1 | 218376187 | 218377254 | 3.36 |
| chr1 | 218435455 | 218436522 | 3.7  |
| chr1 | 218441021 | 218442241 | 4.37 |
| chr1 | 218449258 | 218450255 | 4.04 |
| chr1 | 218454163 | 218455220 | 3.7  |
| chr1 | 218457569 | 218459380 | 8.07 |
| chr1 | 218518057 | 218521223 | 4.71 |
| chr1 | 218553114 | 218554688 | 4.04 |
| chr1 | 218555462 | 218556898 | 3.36 |
| chr1 | 218570759 | 218571770 | 3.7  |



|      |           |           |       |
|------|-----------|-----------|-------|
| chr1 | 218572519 | 218575652 | 3.7   |
| chr1 | 218589408 | 218590127 | 4.04  |
| chr1 | 218609845 | 218611135 | 4.71  |
| chr1 | 218621220 | 218622801 | 4.04  |
| chr1 | 218640013 | 218640832 | 3.7   |
| chr1 | 218651025 | 218652108 | 3.36  |
| chr1 | 218652518 | 218654894 | 5.38  |
| chr1 | 218657261 | 218658525 | 3.7   |
| chr1 | 218662864 | 218664469 | 4.04  |
| chr1 | 218667815 | 218670137 | 4.04  |
| chr1 | 218670723 | 218672174 | 4.37  |
| chr1 | 218678394 | 218684098 | 10.09 |
| chr1 | 218694494 | 218695702 | 4.37  |
| chr1 | 218731835 | 218732768 | 3.36  |
| chr1 | 218740564 | 218741543 | 3.7   |
| chr1 | 218744325 | 218745610 | 4.37  |
| chr1 | 218755658 | 218758012 | 4.37  |
| chr1 | 218758571 | 218759530 | 4.71  |
| chr1 | 218765043 | 218766595 | 4.04  |
| chr1 | 218781123 | 218782254 | 5.72  |
| chr1 | 218783029 | 218785294 | 4.04  |
| chr1 | 218800104 | 218801514 | 3.7   |
| chr1 | 218847464 | 218848401 | 3.7   |
| chr1 | 218864294 | 218865545 | 4.37  |
| chr1 | 218892073 | 218893252 | 5.05  |
| chr1 | 218917909 | 218919714 | 3.36  |
| chr1 | 218945690 | 218946870 | 3.7   |
| chr1 | 218991815 | 218992945 | 3.36  |
| chr1 | 218996719 | 218997622 | 3.7   |
| chr1 | 219102690 | 219103671 | 3.36  |
| chr1 | 219131099 | 219132100 | 3.7   |
| chr1 | 219144213 | 219145257 | 3.36  |
| chr1 | 219177512 | 219179090 | 4.37  |
| chr1 | 219255572 | 219256791 | 5.05  |
| chr1 | 219346806 | 219348152 | 4.04  |
| chr1 | 219429744 | 219430818 | 4.71  |
| chr1 | 219434088 | 219435718 | 4.71  |
| chr1 | 219451367 | 219452735 | 4.37  |
| chr1 | 219462825 | 219463804 | 3.7   |
| chr1 | 219476752 | 219477570 | 3.7   |
| chr1 | 219522418 | 219523281 | 4.37  |
| chr1 | 219532156 | 219533514 | 4.37  |
| chr1 | 219565669 | 219567803 | 5.72  |

|      |           |           |       |
|------|-----------|-----------|-------|
| chr1 | 219570729 | 219571604 | 3.36  |
| chr1 | 219580727 | 219581694 | 4.04  |
| chr1 | 219598742 | 219599653 | 3.7   |
| chr1 | 219669710 | 219670629 | 3.36  |
| chr1 | 219680385 | 219681560 | 4.71  |
| chr1 | 219690340 | 219691184 | 3.7   |
| chr1 | 219701627 | 219703001 | 4.04  |
| chr1 | 219703954 | 219705232 | 4.04  |
| chr1 | 219709821 | 219711128 | 3.7   |
| chr1 | 219716077 | 219716886 | 3.36  |
| chr1 | 219733851 | 219734815 | 3.03  |
| chr1 | 219742669 | 219743531 | 3.36  |
| chr1 | 220422191 | 220423755 | 4.71  |
| chr1 | 220888837 | 220890019 | 4.37  |
| chr1 | 222942407 | 222943380 | 1.35  |
| chr1 | 224010415 | 224011209 | 1.01  |
| chr1 | 224041412 | 224042270 | 1.35  |
| chr1 | 224200524 | 224201620 | 4.04  |
| chr1 | 224530905 | 224532205 | 5.72  |
| chr1 | 224826320 | 224827256 | 1.01  |
| chr1 | 224946511 | 224947313 | 3.7   |
| chr1 | 225101417 | 225102861 | 8.41  |
| chr1 | 225121231 | 225123529 | 4.71  |
| chr1 | 226373741 | 226375417 | 2.02  |
| chr1 | 226496155 | 226497546 | 2.35  |
| chr1 | 226844474 | 226845175 | 2.35  |
| chr1 | 227472964 | 227474514 | 6.05  |
| chr1 | 227778406 | 227779262 | 3.36  |
| chr1 | 227786256 | 227787076 | 3.36  |
| chr1 | 227805916 | 227806735 | 3.03  |
| chr1 | 227811423 | 227812231 | 3.7   |
| chr1 | 227823869 | 227825731 | 4.37  |
| chr1 | 227831649 | 227832709 | 3.7   |
| chr1 | 227834772 | 227836042 | 4.04  |
| chr1 | 227838262 | 227840611 | 5.05  |
| chr1 | 227840849 | 227845607 | 14.13 |
| chr1 | 227848049 | 227849978 | 3.36  |
| chr1 | 227851424 | 227852332 | 3.7   |
| chr1 | 227857691 | 227858731 | 4.04  |
| chr1 | 227883742 | 227886092 | 5.05  |
| chr1 | 227908685 | 227909981 | 4.71  |
| chr1 | 228001092 | 228002540 | 7.74  |
| chr1 | 228218723 | 228219716 | 2.02  |

|      |           |           |       |
|------|-----------|-----------|-------|
| chr1 | 228281812 | 228283184 | 4.71  |
| chr1 | 228305156 | 228306627 | 10.09 |
| chr1 | 228386222 | 228387647 | 9.42  |
| chr1 | 228531689 | 228533172 | 3.7   |
| chr1 | 228832927 | 228833792 | 1.01  |
| chr1 | 229019015 | 229019968 | 1.68  |
| chr1 | 229153607 | 229154546 | 1.01  |
| chr1 | 229265806 | 229266669 | 1.68  |
| chr1 | 229674680 | 229675619 | 1.35  |
| chr1 | 229945465 | 229946766 | 3.7   |
| chr1 | 230559810 | 230560810 | 1.35  |
| chr1 | 231019936 | 231021254 | 3.7   |
| chr1 | 231297997 | 231299008 | 1.35  |
| chr1 | 231393832 | 231395301 | 3.7   |
| chr1 | 231634793 | 231635766 | 4.04  |
| chr1 | 231751911 | 231752715 | 1.35  |
| chr1 | 231821721 | 231822613 | 5.05  |
| chr1 | 232067084 | 232068415 | 2.35  |
| chr1 | 232336818 | 232337629 | 1.35  |
| chr1 | 232492457 | 232493294 | 1.01  |
| chr1 | 232884467 | 232885567 | 5.72  |
| chr1 | 233464009 | 233465014 | 2.02  |
| chr1 | 233697338 | 233698545 | 2.69  |
| chr1 | 234002648 | 234003488 | 3.7   |
| chr1 | 234912120 | 234916005 | 5.05  |
| chr1 | 234916277 | 234919003 | 4.04  |
| chr1 | 234971745 | 234972595 | 1.35  |
| chr1 | 235751436 | 235753140 | 7.4   |
| chr1 | 235832857 | 235834115 | 7.4   |
| chr1 | 236260118 | 236261187 | 4.71  |
| chr1 | 238679452 | 238680969 | 3.03  |
| chr1 | 239388408 | 239389511 | 4.04  |
| chr1 | 240142612 | 240143569 | 5.72  |
| chr1 | 240703070 | 240703882 | 1.35  |
| chr1 | 241099849 | 241101104 | 3.7   |
| chr1 | 243393537 | 243395001 | 6.39  |
| chr1 | 244736646 | 244737882 | 6.39  |
| chr1 | 244738334 | 244740418 | 5.38  |
| chr1 | 244980901 | 244981713 | 1.68  |
| chr1 | 246421588 | 246422531 | 3.7   |
| chr1 | 246678126 | 246680359 | 10.43 |
| chr1 | 246857119 | 246858697 | 4.37  |
| chr1 | 247146932 | 247153387 | 7.74  |

|                |           |           |       |
|----------------|-----------|-----------|-------|
| chr1           | 247155605 | 247156497 | 3.7   |
| chr1           | 247164998 | 247165892 | 3.36  |
| chr1           | 247169724 | 247170523 | 4.37  |
| chr1           | 247187197 | 247188146 | 3.36  |
| chr1           | 247196816 | 247198262 | 4.71  |
| chr1           | 247198782 | 247199809 | 3.7   |
| chr1           | 247200113 | 247203661 | 9.08  |
| chr1           | 247204523 | 247206992 | 4.71  |
| chr1           | 247207953 | 247212574 | 6.73  |
| chr1           | 247214511 | 247215349 | 3.36  |
| chr1           | 247216853 | 247218788 | 3.7   |
| chr1           | 247219335 | 247221089 | 3.7   |
| chr1           | 247228105 | 247229421 | 4.04  |
| chr1           | 247233749 | 247234624 | 4.37  |
| chr1           | 247259567 | 247260403 | 5.05  |
| chr1           | 247263409 | 247265912 | 6.05  |
| chr1           | 247293204 | 247295604 | 5.38  |
| chr1           | 247297326 | 247299054 | 4.37  |
| chr1           | 247301255 | 247305591 | 4.71  |
| chr1           | 247306001 | 247309368 | 4.71  |
| chr1           | 247309635 | 247311723 | 4.71  |
| chr1           | 247312097 | 247313272 | 4.71  |
| chr1           | 247316442 | 247321592 | 11.44 |
| chr1           | 247322054 | 247323612 | 5.05  |
| chr1           | 247325654 | 247328008 | 4.04  |
| chr1           | 247329325 | 247331151 | 3.7   |
| chr1           | 247347414 | 247348872 | 4.04  |
| chr1           | 247352548 | 247355745 | 6.39  |
| chr1           | 247367080 | 247368366 | 4.37  |
| chr1           | 248584357 | 248585547 | 5.72  |
| chr1           | 248832774 | 248834146 | 6.39  |
| chr1           | 248876836 | 248878463 | 9.42  |
| chr1           | 249167695 | 249168749 | 3.7   |
| :hrUn_gl00022l | 66760     | 67395     | 3.7   |
| :hrUn_gl00022l | 69083     | 75362     | 7.4   |
| :hrUn_gl00022l | 75842     | 84125     | 6.05  |
| :hrUn_gl00022l | 85687     | 102375    | 20.52 |
| :hrUn_gl00022l | 104071    | 104473    | 8.07  |
| chr9           | 633778    | 634955    | 5.38  |
| chr9           | 684824    | 686173    | 3.7   |
| chr9           | 706425    | 707440    | 4.37  |
| chr9           | 777652    | 779028    | 4.71  |
| chr9           | 893823    | 894640    | 3.03  |

|      |          |          |       |
|------|----------|----------|-------|
| chr9 | 1034419  | 1035180  | 4.71  |
| chr9 | 1049704  | 1050818  | 3.7   |
| chr9 | 1170148  | 1171382  | 4.04  |
| chr9 | 2313047  | 2314607  | 3.7   |
| chr9 | 2591809  | 2592881  | 3.7   |
| chr9 | 3787628  | 3788467  | 3.7   |
| chr9 | 4196462  | 4198364  | 4.71  |
| chr9 | 5230194  | 5231435  | 7.06  |
| chr9 | 5407910  | 5409360  | 4.04  |
| chr9 | 5652335  | 5653327  | 3.36  |
| chr9 | 5817867  | 5818978  | 3.7   |
| chr9 | 5846054  | 5847227  | 4.04  |
| chr9 | 12957989 | 12958980 | 4.37  |
| chr9 | 16996377 | 16997870 | 4.37  |
| chr9 | 17254080 | 17254889 | 3.36  |
| chr9 | 22316383 | 22317452 | 3.7   |
| chr9 | 25852463 | 25853256 | 3.7   |
| chr9 | 29129317 | 29130486 | 5.05  |
| chr9 | 32517723 | 32519296 | 5.38  |
| chr9 | 32603903 | 32605005 | 4.71  |
| chr9 | 33339699 | 33341141 | 6.73  |
| chr9 | 33706517 | 33707566 | 6.39  |
| chr9 | 35141615 | 35143196 | 4.37  |
| chr9 | 35192230 | 35193553 | 4.37  |
| chr9 | 35203514 | 35204461 | 4.04  |
| chr9 | 37800274 | 37801424 | 4.04  |
| chr9 | 38170427 | 38171523 | 5.38  |
| chr9 | 38384557 | 38385458 | 4.04  |
| chr9 | 66481516 | 66482983 | 6.39  |
| chr9 | 66822461 | 66824784 | 4.04  |
| chr9 | 66832615 | 66836332 | 12.78 |
| chr9 | 68412299 | 68422764 | 8.75  |
| chr9 | 68423625 | 68426354 | 4.37  |
| chr9 | 68999344 | 69000849 | 4.04  |
| chr9 | 69982652 | 69983287 | 6.05  |
| chr9 | 71644458 | 71645043 | 4.04  |
| chr9 | 71927325 | 71929059 | 6.73  |
| chr9 | 72548502 | 72549258 | 3.36  |
| chr9 | 73273280 | 73274574 | 4.71  |
| chr9 | 74474278 | 74475651 | 4.04  |
| chr9 | 74495159 | 74496006 | 4.04  |
| chr9 | 75151407 | 75152777 | 6.73  |
| chr9 | 79058883 | 79059832 | 3.36  |

|      |          |          |       |
|------|----------|----------|-------|
| chr9 | 80155133 | 80156476 | 4.71  |
| chr9 | 83031221 | 83033228 | 5.38  |
| chr9 | 83249623 | 83250860 | 5.38  |
| chr9 | 83533842 | 83534961 | 3.7   |
| chr9 | 84041434 | 84043836 | 7.74  |
| chr9 | 84059173 | 84061187 | 6.73  |
| chr9 | 84301248 | 84302669 | 4.71  |
| chr9 | 84569842 | 84571253 | 5.05  |
| chr9 | 84960566 | 84961845 | 9.42  |
| chr9 | 85530223 | 85533370 | 10.76 |
| chr9 | 85676432 | 85678698 | 4.71  |
| chr9 | 86594745 | 86596201 | 4.37  |
| chr9 | 86656459 | 86657857 | 6.39  |
| chr9 | 86808605 | 86809540 | 3.7   |
| chr9 | 87283107 | 87284247 | 3.7   |
| chr9 | 88807231 | 88808962 | 4.71  |
| chr9 | 88867118 | 88868707 | 9.75  |
| chr9 | 88968071 | 88969531 | 4.37  |
| chr9 | 90069775 | 90071374 | 10.43 |
| chr9 | 90116702 | 90117554 | 4.04  |
| chr9 | 90357511 | 90358713 | 5.38  |
| chr9 | 90381644 | 90382503 | 3.7   |
| chr9 | 90658640 | 90660013 | 5.38  |
| chr9 | 90866295 | 90867871 | 5.38  |
| chr9 | 91033687 | 91035029 | 5.38  |
| chr9 | 91144725 | 91145700 | 3.7   |
| chr9 | 91228746 | 91229808 | 4.37  |
| chr9 | 91533512 | 91534318 | 3.7   |
| chr9 | 91749004 | 91750663 | 9.08  |
| chr9 | 91794677 | 91795743 | 4.37  |
| chr9 | 91932950 | 91934188 | 4.71  |
| chr9 | 92220991 | 92222140 | 3.36  |
| chr9 | 93023177 | 93024893 | 6.05  |
| chr9 | 93527302 | 93528566 | 4.04  |
| chr9 | 93529049 | 93530723 | 6.73  |
| chr9 | 93563807 | 93564771 | 3.36  |
| chr9 | 93955573 | 93956851 | 3.7   |
| chr9 | 94185913 | 94187218 | 4.04  |
| chr9 | 94526735 | 94527727 | 3.36  |
| chr9 | 94691916 | 94693694 | 7.74  |
| chr9 | 95427982 | 95428839 | 3.36  |
| chr9 | 95606347 | 95611303 | 18.84 |
| chr9 | 95612040 | 95613965 | 4.04  |

|      |          |          |       |
|------|----------|----------|-------|
| chr9 | 95745534 | 95751355 | 15.47 |
| chr9 | 95753688 | 95755068 | 3.7   |
| chr9 | 96074807 | 96075973 | 4.04  |
| chr9 | 96099437 | 96102239 | 6.05  |
| chr9 | 96121440 | 96123144 | 5.05  |
| chr9 | 96123524 | 96125268 | 8.41  |
| chr9 | 96180960 | 96182205 | 5.38  |
| chr9 | 96346449 | 96347881 | 3.7   |
| chr9 | 96510642 | 96513317 | 4.71  |
| chr9 | 96637019 | 96638347 | 4.71  |
| chr9 | 96752718 | 96753921 | 4.04  |
| chr9 | 96888228 | 96889522 | 4.71  |
| chr9 | 97029156 | 97030492 | 6.39  |
| chr9 | 97030963 | 97032388 | 4.04  |
| chr9 | 97040467 | 97041760 | 4.71  |
| chr9 | 97227876 | 97229179 | 4.04  |
| chr9 | 97233696 | 97235270 | 6.05  |
| chr9 | 97392456 | 97393904 | 4.37  |
| chr9 | 97400534 | 97401873 | 4.71  |
| chr9 | 97431062 | 97431941 | 4.04  |
| chr9 | 97545023 | 97546293 | 7.06  |
| chr9 | 97676114 | 97677460 | 4.71  |
| chr9 | 97770376 | 97771223 | 3.7   |
| chr9 | 98086253 | 98090916 | 11.1  |
| chr9 | 98099029 | 98100798 | 3.7   |
| chr9 | 98184410 | 98185870 | 5.72  |
| chr9 | 98280378 | 98281291 | 3.7   |
| chr9 | 99036530 | 99038249 | 4.37  |
| chr9 | 99045963 | 99047286 | 7.06  |
| chr9 | 99139311 | 99140274 | 4.04  |
| chr9 | 99451701 | 99454285 | 3.7   |
| chr9 | 99464059 | 99465715 | 3.36  |
| chr9 | 99471601 | 99476909 | 4.71  |
| chr9 | 99480200 | 99481983 | 3.36  |
| chr9 | 99482422 | 99483337 | 3.7   |
| chr9 | 99483764 | 99485843 | 4.37  |
| chr9 | 99487245 | 99489005 | 4.37  |
| chr9 | 99491809 | 99493016 | 4.71  |
| chr9 | 99494836 | 99496246 | 3.7   |
| chr9 | 99496887 | 99497932 | 3.7   |
| chr9 | 99498294 | 99504679 | 9.08  |
| chr9 | 99505415 | 99509115 | 4.04  |
| chr9 | 99510269 | 99511647 | 4.37  |

|      |           |           |       |
|------|-----------|-----------|-------|
| chr9 | 99512086  | 99526964  | 14.46 |
| chr9 | 99527709  | 99529155  | 4.04  |
| chr9 | 99529477  | 99534937  | 7.06  |
| chr9 | 99551333  | 99559160  | 5.38  |
| chr9 | 99565432  | 99570924  | 6.05  |
| chr9 | 99572363  | 99586013  | 12.78 |
| chr9 | 99588691  | 99590178  | 4.71  |
| chr9 | 99591506  | 99593372  | 4.71  |
| chr9 | 99594063  | 99595015  | 3.7   |
| chr9 | 99596042  | 99600991  | 6.39  |
| chr9 | 99602449  | 99604360  | 4.71  |
| chr9 | 99604814  | 99607331  | 4.37  |
| chr9 | 99607595  | 99612636  | 5.38  |
| chr9 | 100000198 | 100001304 | 3.7   |
| chr9 | 100395495 | 100396563 | 3.7   |
| chr9 | 100745456 | 100746896 | 3.36  |
| chr9 | 100934618 | 100935589 | 4.71  |
| chr9 | 101017693 | 101018709 | 3.03  |
| chr9 | 101127026 | 101128314 | 3.36  |
| chr9 | 101222537 | 101223859 | 4.04  |
| chr9 | 101772259 | 101774522 | 9.75  |
| chr9 | 102794793 | 102796016 | 6.05  |
| chr9 | 104154501 | 104155606 | 4.04  |
| chr9 | 104156515 | 104157431 | 4.04  |
| chr9 | 104169755 | 104172980 | 11.1  |
| chr9 | 105732360 | 105733529 | 1.68  |
| chr9 | 105860553 | 105861498 | 3.7   |
| chr9 | 105891931 | 105893429 | 5.05  |
| chr9 | 107174098 | 107175450 | 5.38  |
| chr9 | 107985494 | 107986805 | 5.72  |
| chr9 | 108006073 | 108007417 | 5.38  |
| chr9 | 108220123 | 108221337 | 4.71  |
| chr9 | 108319911 | 108320897 | 4.04  |
| chr9 | 108323122 | 108325601 | 4.71  |
| chr9 | 108332116 | 108333250 | 3.36  |
| chr9 | 108496454 | 108498264 | 5.38  |
| chr9 | 108704862 | 108705765 | 3.36  |
| chr9 | 108706994 | 108708531 | 4.04  |
| chr9 | 108780849 | 108781668 | 3.7   |
| chr9 | 109799390 | 109800296 | 3.36  |
| chr9 | 110616716 | 110618420 | 9.42  |
| chr9 | 111311419 | 111312249 | 3.03  |
| chr9 | 111613353 | 111614135 | 1.68  |



|      |           |           |       |
|------|-----------|-----------|-------|
| chr9 | 111881523 | 111882379 | 4.04  |
| chr9 | 112029490 | 112030771 | 4.37  |
| chr9 | 113073851 | 113075336 | 7.4   |
| chr9 | 114027942 | 114028920 | 5.72  |
| chr9 | 114295259 | 114297093 | 4.04  |
| chr9 | 114302623 | 114308586 | 10.43 |
| chr9 | 114309542 | 114313525 | 6.39  |
| chr9 | 114314247 | 114317304 | 4.37  |
| chr9 | 114329287 | 114331861 | 4.71  |
| chr9 | 114492746 | 114493666 | 4.04  |
| chr9 | 114658262 | 114659696 | 4.04  |
| chr9 | 114660089 | 114660979 | 4.04  |
| chr9 | 114773834 | 114775069 | 4.04  |
| chr9 | 114796049 | 114796904 | 4.04  |
| chr9 | 114827662 | 114828672 | 3.7   |
| chr9 | 115045660 | 115046990 | 5.72  |
| chr9 | 115142304 | 115143238 | 4.04  |
| chr9 | 115757170 | 115758083 | 3.03  |
| chr9 | 115758748 | 115760945 | 8.75  |
| chr9 | 115799347 | 115800183 | 3.03  |
| chr9 | 115803190 | 115808037 | 14.8  |
| chr9 | 115810367 | 115811257 | 4.04  |
| chr9 | 115815255 | 115816511 | 3.36  |
| chr9 | 115823380 | 115824395 | 6.39  |
| chr9 | 115983383 | 115984266 | 3.03  |
| chr9 | 116172009 | 116173552 | 5.05  |
| chr9 | 116226747 | 116227671 | 3.7   |
| chr9 | 116444412 | 116445414 | 3.36  |
| chr9 | 116477915 | 116479052 | 3.36  |
| chr9 | 117313807 | 117314843 | 4.37  |
| chr9 | 117669852 | 117671328 | 4.04  |
| chr9 | 117724824 | 117725692 | 3.7   |
| chr9 | 119445270 | 119446511 | 7.4   |
| chr9 | 119638902 | 119640133 | 6.05  |
| chr9 | 121498112 | 121499308 | 7.74  |
| chr9 | 123566651 | 123567815 | 3.7   |
| chr9 | 123568927 | 123570806 | 4.37  |
| chr9 | 124855206 | 124856025 | 5.05  |
| chr9 | 125181973 | 125183489 | 6.73  |
| chr9 | 125493402 | 125495428 | 5.05  |
| chr9 | 125702703 | 125704063 | 3.7   |
| chr9 | 126089628 | 126090613 | 4.71  |
| chr9 | 126484281 | 126485574 | 6.39  |

|      |           |           |      |
|------|-----------|-----------|------|
| chr9 | 126590088 | 126591763 | 6.73 |
| chr9 | 127020841 | 127022392 | 5.72 |
| chr9 | 127962319 | 127963589 | 3.36 |
| chr9 | 128003344 | 128004888 | 3.36 |
| chr9 | 128070940 | 128071651 | 4.37 |
| chr9 | 128275381 | 128277383 | 4.37 |
| chr9 | 128298000 | 128298940 | 4.71 |
| chr9 | 128333169 | 128334971 | 9.75 |
| chr9 | 128770833 | 128771958 | 3.36 |
| chr9 | 129123519 | 129124896 | 7.4  |
| chr9 | 129423160 | 129424916 | 4.37 |
| chr9 | 129497226 | 129498600 | 5.72 |
| chr9 | 129581935 | 129582883 | 3.7  |
| chr9 | 129837780 | 129838857 | 4.37 |
| chr9 | 130098922 | 130099823 | 3.03 |
| chr9 | 130206021 | 130209188 | 7.74 |
| chr9 | 130287709 | 130288497 | 4.37 |
| chr9 | 130307212 | 130308432 | 4.04 |
| chr9 | 130336337 | 130337397 | 3.7  |
| chr9 | 130462582 | 130463627 | 3.7  |
| chr9 | 130610837 | 130612236 | 7.4  |
| chr9 | 130654269 | 130657074 | 9.08 |
| chr9 | 130769582 | 130770527 | 3.36 |
| chr9 | 130784057 | 130784959 | 3.7  |
| chr9 | 130797091 | 130797984 | 4.37 |
| chr9 | 130897277 | 130898136 | 3.7  |
| chr9 | 130940842 | 130941654 | 4.37 |
| chr9 | 130954699 | 130955848 | 5.38 |
| chr9 | 131060590 | 131061819 | 5.72 |
| chr9 | 131084294 | 131085349 | 3.7  |
| chr9 | 131533687 | 131534929 | 4.37 |
| chr9 | 131543319 | 131544740 | 4.71 |
| chr9 | 131607036 | 131608275 | 4.04 |
| chr9 | 131622056 | 131623020 | 4.04 |
| chr9 | 131785625 | 131786607 | 4.37 |
| chr9 | 131928997 | 131931710 | 4.37 |
| chr9 | 131936538 | 131938793 | 4.71 |
| chr9 | 132063736 | 132065175 | 8.41 |
| chr9 | 132095941 | 132097480 | 5.05 |
| chr9 | 132117200 | 132118483 | 3.7  |
| chr9 | 132245085 | 132246003 | 3.7  |
| chr9 | 132257175 | 132259021 | 3.7  |
| chr9 | 132275143 | 132278253 | 7.74 |

|      |           |           |       |
|------|-----------|-----------|-------|
| chr9 | 132518036 | 132518854 | 3.36  |
| chr9 | 132704185 | 132705203 | 3.36  |
| chr9 | 133305586 | 133306455 | 4.71  |
| chr9 | 133709902 | 133710715 | 3.03  |
| chr9 | 133777665 | 133778466 | 2.35  |
| chr9 | 134187828 | 134188790 | 1.68  |
| chr9 | 134268757 | 134270026 | 4.37  |
| chr9 | 134417911 | 134419751 | 7.74  |
| chr9 | 134420324 | 134421142 | 4.04  |
| chr9 | 134614172 | 134616151 | 3.7   |
| chr9 | 135368113 | 135368922 | 3.36  |
| chr9 | 135571959 | 135573542 | 5.72  |
| chr9 | 135577203 | 135578465 | 6.39  |
| chr9 | 135819468 | 135820773 | 5.38  |
| chr9 | 135830059 | 135831784 | 4.37  |
| chr9 | 136161842 | 136167802 | 7.06  |
| chr9 | 136212126 | 136212944 | 5.38  |
| chr9 | 136242194 | 136243569 | 4.37  |
| chr9 | 136253426 | 136254218 | 4.04  |
| chr9 | 136366688 | 136368221 | 3.7   |
| chr9 | 136461912 | 136464173 | 15.14 |
| chr9 | 136738661 | 136739976 | 4.37  |
| chr9 | 136950253 | 136951431 | 4.71  |
| chr9 | 137029579 | 137030482 | 3.36  |
| chr9 | 137177996 | 137179212 | 4.71  |
| chr9 | 137259092 | 137259909 | 3.36  |
| chr9 | 137270354 | 137271203 | 3.7   |
| chr9 | 137290775 | 137292039 | 4.04  |
| chr9 | 137303699 | 137304708 | 4.37  |
| chr9 | 137305239 | 137306106 | 3.7   |
| chr9 | 137326253 | 137327163 | 3.7   |
| chr9 | 137339185 | 137341823 | 6.05  |
| chr9 | 137551791 | 137553158 | 3.03  |
| chr9 | 137786284 | 137787144 | 4.37  |
| chr9 | 137891231 | 137893993 | 12.78 |
| chr9 | 137914864 | 137915909 | 4.71  |
| chr9 | 137955201 | 137956534 | 6.39  |
| chr9 | 137967100 | 137968042 | 3.36  |
| chr9 | 138102503 | 138104310 | 3.7   |
| chr9 | 138283886 | 138284917 | 5.05  |
| chr9 | 138315134 | 138315929 | 3.7   |
| chr9 | 138390940 | 138393040 | 4.37  |
| chr9 | 138519949 | 138520838 | 4.04  |

|      |           |           |       |
|------|-----------|-----------|-------|
| chr9 | 138536285 | 138538519 | 7.06  |
| chr9 | 138538907 | 138542037 | 8.41  |
| chr9 | 138544689 | 138545993 | 6.39  |
| chr9 | 138786456 | 138787691 | 4.71  |
| chr9 | 138800112 | 138801093 | 3.03  |
| chr9 | 138806434 | 138809534 | 5.05  |
| chr9 | 138810284 | 138811467 | 4.37  |
| chr9 | 138863474 | 138864605 | 5.38  |
| chr9 | 138920439 | 138921786 | 6.05  |
| chr9 | 139440259 | 139441355 | 5.05  |
| chr9 | 139453256 | 139454597 | 7.4   |
| chr9 | 139588131 | 139589606 | 3.7   |
| chr9 | 139619612 | 139620710 | 4.37  |
| chr9 | 139645622 | 139646824 | 4.04  |
| chr9 | 139668592 | 139669727 | 4.04  |
| chr9 | 139741905 | 139743050 | 4.04  |
| chr9 | 139753158 | 139754422 | 3.7   |
| chr9 | 139764509 | 139768490 | 14.13 |
| chr9 | 139940426 | 139941770 | 4.71  |
| chr9 | 140121184 | 140122627 | 4.04  |
| chr9 | 140188467 | 140189683 | 5.72  |
| chr9 | 140221976 | 140223051 | 4.37  |
| chr9 | 140250839 | 140252359 | 4.04  |
| chr9 | 140369964 | 140370970 | 3.36  |
| chr9 | 140403023 | 140404634 | 6.73  |
| chr9 | 140407779 | 140409062 | 4.37  |
| chr9 | 140426897 | 140427837 | 3.7   |
| chr9 | 140428374 | 140429882 | 3.7   |
| chr9 | 140440498 | 140442493 | 4.04  |
| chr9 | 140445696 | 140447561 | 4.71  |
| chr9 | 140505925 | 140507288 | 5.38  |
| chr9 | 140596620 | 140597952 | 4.71  |
| chr9 | 140777025 | 140782698 | 4.71  |
| chr9 | 140783841 | 140784785 | 3.03  |
| chr9 | 140838183 | 140842224 | 12.11 |
| chr9 | 140979301 | 140981437 | 4.37  |
| chr8 | 194751    | 197199    | 7.4   |
| chr8 | 2208856   | 2210049   | 1.35  |
| chr8 | 8215439   | 8216814   | 4.04  |
| chr8 | 8219523   | 8220502   | 3.7   |
| chr8 | 8292598   | 8293923   | 7.4   |
| chr8 | 23457258  | 23458694  | 6.39  |
| chr8 | 23678719  | 23679742  | 4.04  |

|      |          |          |       |
|------|----------|----------|-------|
| chr8 | 39723854 | 39724816 | 4.04  |
| chr8 | 42095762 | 42097134 | 6.05  |
| chr8 | 42962856 | 42964370 | 12.45 |
| chr8 | 42964970 | 42966224 | 9.08  |
| chr8 | 42979307 | 42980452 | 5.05  |
| chr8 | 43443119 | 43454892 | 5.38  |
| chr8 | 43455613 | 43457827 | 3.36  |
| chr8 | 43458572 | 43461613 | 5.05  |
| chr8 | 43463216 | 43480937 | 6.39  |
| chr8 | 43481517 | 43491181 | 6.39  |
| chr8 | 43491619 | 43492674 | 4.04  |
| chr8 | 43493070 | 43497708 | 4.71  |
| chr8 | 43497985 | 43502114 | 6.73  |
| chr8 | 43504626 | 43517834 | 6.73  |
| chr8 | 43518256 | 43522918 | 4.71  |
| chr8 | 43523195 | 43527996 | 5.38  |
| chr8 | 43528721 | 43532932 | 5.38  |
| chr8 | 43534058 | 43541495 | 5.05  |
| chr8 | 43543801 | 43547665 | 5.38  |
| chr8 | 43557770 | 43560034 | 5.38  |
| chr8 | 43564004 | 43565754 | 5.72  |
| chr8 | 43566080 | 43579001 | 6.39  |
| chr8 | 43579860 | 43580793 | 4.71  |
| chr8 | 43584839 | 43586194 | 4.71  |
| chr8 | 43586709 | 43587664 | 4.04  |
| chr8 | 43588046 | 43590813 | 4.71  |
| chr8 | 43591261 | 43594170 | 5.05  |
| chr8 | 43596077 | 43599625 | 6.05  |
| chr8 | 43604074 | 43610185 | 5.05  |
| chr8 | 43610444 | 43612033 | 4.37  |
| chr8 | 43612873 | 43613636 | 3.7   |
| chr8 | 43613975 | 43616440 | 4.37  |
| chr8 | 43618985 | 43627509 | 5.72  |
| chr8 | 43627904 | 43629426 | 4.71  |
| chr8 | 43630718 | 43636197 | 5.72  |
| chr8 | 43637521 | 43640116 | 3.7   |
| chr8 | 43640405 | 43644765 | 4.71  |
| chr8 | 43646248 | 43648567 | 3.36  |
| chr8 | 43649186 | 43650618 | 3.7   |
| chr8 | 43650916 | 43653721 | 6.05  |
| chr8 | 43658475 | 43661890 | 5.38  |
| chr8 | 43662610 | 43666325 | 5.05  |
| chr8 | 43667093 | 43667945 | 3.36  |

|      |          |          |       |
|------|----------|----------|-------|
| chr8 | 43672105 | 43677908 | 5.05  |
| chr8 | 43681565 | 43682652 | 3.36  |
| chr8 | 43684147 | 43685388 | 3.7   |
| chr8 | 43686692 | 43691878 | 4.71  |
| chr8 | 43693837 | 43696069 | 4.71  |
| chr8 | 43696516 | 43698074 | 3.7   |
| chr8 | 43699227 | 43711043 | 5.38  |
| chr8 | 43712256 | 43713156 | 3.36  |
| chr8 | 43713772 | 43716042 | 5.05  |
| chr8 | 43718962 | 43719771 | 4.04  |
| chr8 | 43724283 | 43726277 | 3.7   |
| chr8 | 43729110 | 43732645 | 4.37  |
| chr8 | 43733317 | 43735377 | 3.36  |
| chr8 | 43735636 | 43737880 | 5.38  |
| chr8 | 43741669 | 43744206 | 4.04  |
| chr8 | 43744792 | 43746189 | 4.04  |
| chr8 | 43754471 | 43755900 | 4.37  |
| chr8 | 43782192 | 43783053 | 4.37  |
| chr8 | 43784832 | 43786197 | 4.71  |
| chr8 | 43794152 | 43794969 | 5.05  |
| chr8 | 43821869 | 43822588 | 4.04  |
| chr8 | 43830846 | 43831922 | 24.22 |
| chr8 | 43836583 | 43837712 | 12.78 |
| chr8 | 43838511 | 43839041 | 15.47 |
| chr8 | 46839284 | 46842235 | 16.15 |
| chr8 | 46843305 | 46844175 | 9.75  |
| chr8 | 46844770 | 46846062 | 8.75  |
| chr8 | 46846585 | 46848380 | 9.42  |
| chr8 | 46848611 | 46849145 | 6.39  |
| chr8 | 46849404 | 46850541 | 10.76 |
| chr8 | 46850901 | 46852965 | 7.74  |
| chr8 | 46855834 | 46857061 | 5.05  |
| chr8 | 46868281 | 46869493 | 11.77 |
| chr8 | 46882357 | 46883068 | 5.05  |
| chr8 | 46883373 | 46884886 | 8.41  |
| chr8 | 46902407 | 46903941 | 7.4   |
| chr8 | 46908003 | 46910899 | 4.71  |
| chr8 | 46915678 | 46923259 | 9.08  |
| chr8 | 46956253 | 46958439 | 8.07  |
| chr8 | 46958738 | 46968253 | 5.72  |
| chr8 | 46969783 | 46976533 | 5.05  |
| chr8 | 46976779 | 46979664 | 4.71  |
| chr8 | 46980691 | 46984105 | 5.72  |

|      |          |          |      |
|------|----------|----------|------|
| chr8 | 46984710 | 46987117 | 6.05 |
| chr8 | 46990746 | 46991775 | 5.38 |
| chr8 | 46992288 | 46994189 | 4.04 |
| chr8 | 46995938 | 46997888 | 4.37 |
| chr8 | 46998595 | 47002324 | 7.06 |
| chr8 | 47002681 | 47003650 | 3.36 |
| chr8 | 47005626 | 47009777 | 6.39 |
| chr8 | 47066211 | 47068473 | 5.38 |
| chr8 | 47068806 | 47069967 | 3.7  |
| chr8 | 47071875 | 47076046 | 5.05 |
| chr8 | 47076622 | 47080153 | 6.73 |
| chr8 | 47080749 | 47082901 | 4.71 |
| chr8 | 47083343 | 47084984 | 4.71 |
| chr8 | 47195428 | 47197508 | 6.73 |
| chr8 | 47198826 | 47203902 | 4.71 |
| chr8 | 47204131 | 47221040 | 6.73 |
| chr8 | 47223942 | 47231191 | 6.39 |
| chr8 | 47232494 | 47237892 | 6.05 |
| chr8 | 47265533 | 47267150 | 4.71 |
| chr8 | 47268328 | 47282694 | 6.05 |
| chr8 | 47302837 | 47306220 | 5.38 |
| chr8 | 47306869 | 47308691 | 3.7  |
| chr8 | 47308933 | 47312276 | 5.38 |
| chr8 | 47364981 | 47367141 | 5.38 |
| chr8 | 47369137 | 47372225 | 3.7  |
| chr8 | 47372647 | 47381174 | 4.37 |
| chr8 | 47381667 | 47395571 | 7.06 |
| chr8 | 47397529 | 47398360 | 3.7  |
| chr8 | 47402842 | 47405503 | 4.37 |
| chr8 | 47407607 | 47427493 | 6.39 |
| chr8 | 47428123 | 47436427 | 5.72 |
| chr8 | 47436920 | 47438297 | 4.04 |
| chr8 | 47439195 | 47441423 | 3.7  |
| chr8 | 47442432 | 47449432 | 4.37 |
| chr8 | 47449762 | 47455845 | 5.38 |
| chr8 | 47464099 | 47464917 | 3.7  |
| chr8 | 47692018 | 47693010 | 4.04 |
| chr8 | 47694777 | 47695641 | 3.03 |
| chr8 | 47696247 | 47698415 | 5.72 |
| chr8 | 47730340 | 47731274 | 4.04 |
| chr8 | 47781048 | 47783970 | 8.07 |
| chr8 | 48126853 | 48128668 | 8.07 |
| chr8 | 48872818 | 48874078 | 2.69 |

|      |          |          |       |
|------|----------|----------|-------|
| chr8 | 48993091 | 48994448 | 5.72  |
| chr8 | 50747589 | 50748844 | 5.05  |
| chr8 | 51133764 | 51135093 | 6.39  |
| chr8 | 51162863 | 51163891 | 3.03  |
| chr8 | 51683663 | 51684985 | 7.06  |
| chr8 | 52713242 | 52715312 | 3.7   |
| chr8 | 53514682 | 53516119 | 9.08  |
| chr8 | 53713067 | 53713987 | 4.04  |
| chr8 | 53717996 | 53719629 | 8.75  |
| chr8 | 53896866 | 53897919 | 3.7   |
| chr8 | 54089367 | 54090530 | 4.37  |
| chr8 | 54184719 | 54186382 | 6.39  |
| chr8 | 54261441 | 54262756 | 7.74  |
| chr8 | 54648701 | 54650014 | 5.38  |
| chr8 | 54698743 | 54699747 | 3.7   |
| chr8 | 55896715 | 55897545 | 1.68  |
| chr8 | 56457098 | 56459261 | 6.73  |
| chr8 | 56685207 | 56686316 | 3.7   |
| chr8 | 56901486 | 56902471 | 3.36  |
| chr8 | 56986654 | 56987810 | 5.38  |
| chr8 | 57281070 | 57282606 | 9.08  |
| chr8 | 57863295 | 57864348 | 4.04  |
| chr8 | 58117696 | 58119057 | 9.08  |
| chr8 | 58122011 | 58123675 | 10.43 |
| chr8 | 58281045 | 58284136 | 8.75  |
| chr8 | 58509686 | 58511574 | 6.39  |
| chr8 | 58689921 | 58691118 | 5.05  |
| chr8 | 60683544 | 60685006 | 6.05  |
| chr8 | 61213606 | 61214980 | 8.41  |
| chr8 | 61405838 | 61410777 | 6.05  |
| chr8 | 61429063 | 61429877 | 3.36  |
| chr8 | 61563903 | 61565183 | 4.37  |
| chr8 | 63290565 | 63291506 | 3.7   |
| chr8 | 64102880 | 64104276 | 4.71  |
| chr8 | 64252277 | 64252953 | 2.35  |
| chr8 | 65643678 | 65645005 | 6.73  |
| chr8 | 66004517 | 66005385 | 3.7   |
| chr8 | 66548866 | 66549627 | 3.7   |
| chr8 | 66570972 | 66571969 | 5.05  |
| chr8 | 66847112 | 66848682 | 5.05  |
| chr8 | 66938379 | 66939506 | 5.05  |
| chr8 | 67025174 | 67026735 | 3.36  |
| chr8 | 67092067 | 67093089 | 3.7   |



|      |          |          |      |
|------|----------|----------|------|
| chr8 | 67161298 | 67162598 | 6.73 |
| chr8 | 67172524 | 67173543 | 3.36 |
| chr8 | 67341035 | 67343240 | 3.7  |
| chr8 | 67434205 | 67435496 | 4.04 |
| chr8 | 67453531 | 67454663 | 4.71 |
| chr8 | 67625535 | 67626380 | 3.7  |
| chr8 | 68756292 | 68757364 | 4.71 |
| chr8 | 69071495 | 69072464 | 3.03 |
| chr8 | 69534168 | 69535000 | 4.71 |
| chr8 | 69570528 | 69574891 | 8.75 |
| chr8 | 69611135 | 69612068 | 4.71 |
| chr8 | 69745767 | 69747392 | 8.41 |
| chr8 | 69756637 | 69757572 | 4.04 |
| chr8 | 69765914 | 69767087 | 4.37 |
| chr8 | 69784574 | 69785536 | 3.7  |
| chr8 | 69805370 | 69808630 | 6.73 |
| chr8 | 69808882 | 69810354 | 3.7  |
| chr8 | 69849936 | 69853824 | 8.75 |
| chr8 | 69854890 | 69856440 | 3.7  |
| chr8 | 69864810 | 69867132 | 4.04 |
| chr8 | 70426754 | 70428404 | 5.72 |
| chr8 | 71643997 | 71645592 | 4.37 |
| chr8 | 74831714 | 74833521 | 7.4  |
| chr8 | 76539927 | 76540837 | 3.7  |
| chr8 | 76903317 | 76905099 | 8.41 |
| chr8 | 77884154 | 77885474 | 4.04 |
| chr8 | 77912008 | 77912898 | 3.7  |
| chr8 | 78481602 | 78482818 | 6.05 |
| chr8 | 79088449 | 79090153 | 6.05 |
| chr8 | 79382207 | 79383559 | 4.71 |
| chr8 | 79442106 | 79443359 | 4.04 |
| chr8 | 79481994 | 79483181 | 5.05 |
| chr8 | 79512516 | 79513897 | 4.71 |
| chr8 | 79565785 | 79567384 | 4.37 |
| chr8 | 79774617 | 79775803 | 4.04 |
| chr8 | 79945323 | 79946153 | 3.7  |
| chr8 | 80945364 | 80946500 | 5.05 |
| chr8 | 81061674 | 81062819 | 5.05 |
| chr8 | 81278661 | 81279830 | 4.04 |
| chr8 | 81490171 | 81491186 | 3.7  |
| chr8 | 81665068 | 81666238 | 4.71 |
| chr8 | 81786449 | 81787490 | 4.04 |
| chr8 | 82643992 | 82645221 | 5.05 |

|      |          |          |       |
|------|----------|----------|-------|
| chr8 | 83140087 | 83141465 | 4.37  |
| chr8 | 84120474 | 84121566 | 3.36  |
| chr8 | 84267458 | 84268440 | 4.37  |
| chr8 | 85224710 | 85226095 | 5.38  |
| chr8 | 85551238 | 85551984 | 3.7   |
| chr8 | 85552228 | 85553963 | 10.09 |
| chr8 | 85664664 | 85665687 | 4.37  |
| chr8 | 86291379 | 86292919 | 3.7   |
| chr8 | 86297138 | 86299882 | 4.04  |
| chr8 | 86303961 | 86305415 | 3.7   |
| chr8 | 86305764 | 86307380 | 4.04  |
| chr8 | 86312858 | 86313707 | 4.04  |
| chr8 | 86314746 | 86316014 | 4.37  |
| chr8 | 86317344 | 86319367 | 4.04  |
| chr8 | 86322004 | 86325221 | 4.37  |
| chr8 | 86329079 | 86330378 | 4.04  |
| chr8 | 86338992 | 86341307 | 4.71  |
| chr8 | 86344878 | 86345683 | 3.36  |
| chr8 | 86353151 | 86353959 | 3.36  |
| chr8 | 86374964 | 86377179 | 5.72  |
| chr8 | 86379716 | 86380936 | 4.04  |
| chr8 | 86385575 | 86388300 | 4.71  |
| chr8 | 86392619 | 86393616 | 3.7   |
| chr8 | 86399885 | 86401962 | 4.37  |
| chr8 | 86404473 | 86405388 | 3.7   |
| chr8 | 86408975 | 86410460 | 3.36  |
| chr8 | 86410706 | 86411643 | 3.7   |
| chr8 | 86420294 | 86421727 | 3.7   |
| chr8 | 86428243 | 86430034 | 4.04  |
| chr8 | 86430461 | 86432010 | 3.03  |
| chr8 | 86434183 | 86437216 | 4.71  |
| chr8 | 86439551 | 86440699 | 3.7   |
| chr8 | 86456384 | 86457261 | 3.03  |
| chr8 | 86458706 | 86460741 | 3.7   |
| chr8 | 86461361 | 86466027 | 4.71  |
| chr8 | 86468154 | 86469694 | 4.37  |
| chr8 | 86482301 | 86483222 | 3.36  |
| chr8 | 86485530 | 86487232 | 4.04  |
| chr8 | 86501572 | 86503556 | 3.36  |
| chr8 | 86504466 | 86505312 | 2.35  |
| chr8 | 86508038 | 86509428 | 4.71  |
| chr8 | 86509689 | 86510724 | 4.04  |
| chr8 | 86511979 | 86517134 | 4.37  |

|      |          |          |      |
|------|----------|----------|------|
| chr8 | 86524197 | 86525393 | 4.04 |
| chr8 | 86567876 | 86568329 | 6.73 |
| chr8 | 86571994 | 86572949 | 6.73 |
| chr8 | 86755072 | 86755465 | 9.42 |
| chr8 | 86781649 | 86782048 | 8.41 |
| chr8 | 86840756 | 86845232 | 4.37 |
| chr8 | 86847152 | 86857203 | 8.41 |
| chr8 | 86857823 | 86859656 | 5.38 |
| chr8 | 86862115 | 86863184 | 3.36 |
| chr8 | 86863959 | 86869061 | 4.71 |
| chr8 | 86869592 | 86876138 | 4.37 |
| chr8 | 86876541 | 86879950 | 4.37 |
| chr8 | 86887228 | 86889413 | 3.7  |
| chr8 | 86891201 | 86894401 | 5.38 |
| chr8 | 86896083 | 86907768 | 6.05 |
| chr8 | 86908355 | 86910085 | 4.04 |
| chr8 | 86910354 | 86912675 | 4.04 |
| chr8 | 86913277 | 86914446 | 3.36 |
| chr8 | 86919508 | 86920513 | 3.7  |
| chr8 | 86921314 | 86923213 | 4.37 |
| chr8 | 86926197 | 86928644 | 4.37 |
| chr8 | 86930750 | 86933118 | 4.37 |
| chr8 | 86933617 | 86935362 | 3.36 |
| chr8 | 86939845 | 86941259 | 5.38 |
| chr8 | 86942175 | 86945984 | 4.71 |
| chr8 | 86947283 | 86948349 | 3.7  |
| chr8 | 86949962 | 86950833 | 3.7  |
| chr8 | 86952194 | 86953711 | 4.04 |
| chr8 | 86954754 | 86956458 | 3.36 |
| chr8 | 86957245 | 86958226 | 4.04 |
| chr8 | 86960527 | 86961559 | 4.37 |
| chr8 | 86968799 | 86970810 | 4.04 |
| chr8 | 86971040 | 86973262 | 4.71 |
| chr8 | 86974467 | 86977487 | 5.05 |
| chr8 | 86979612 | 86980593 | 3.36 |
| chr8 | 86983639 | 86984515 | 3.36 |
| chr8 | 86986877 | 86987875 | 4.04 |
| chr8 | 86991841 | 86993832 | 3.7  |
| chr8 | 86994482 | 86995686 | 3.7  |
| chr8 | 86998542 | 86999942 | 4.71 |
| chr8 | 87001195 | 87002047 | 3.03 |
| chr8 | 87004912 | 87006424 | 2.69 |
| chr8 | 87006979 | 87007985 | 3.7  |

|      |          |          |       |
|------|----------|----------|-------|
| chr8 | 87011891 | 87012756 | 2.02  |
| chr8 | 87016174 | 87018967 | 4.37  |
| chr8 | 87023857 | 87025179 | 4.37  |
| chr8 | 87027462 | 87036131 | 6.73  |
| chr8 | 87036378 | 87037791 | 4.71  |
| chr8 | 87076952 | 87078446 | 3.36  |
| chr8 | 87087343 | 87088281 | 3.7   |
| chr8 | 87096323 | 87097502 | 4.37  |
| chr8 | 87108509 | 87109549 | 3.36  |
| chr8 | 87119601 | 87120738 | 3.7   |
| chr8 | 87123829 | 87125055 | 4.71  |
| chr8 | 87129575 | 87131770 | 4.04  |
| chr8 | 87147612 | 87149049 | 4.04  |
| chr8 | 87149658 | 87150653 | 5.05  |
| chr8 | 87161667 | 87162926 | 4.37  |
| chr8 | 87163357 | 87164361 | 3.7   |
| chr8 | 87164641 | 87166125 | 4.37  |
| chr8 | 87168104 | 87169188 | 3.03  |
| chr8 | 87170440 | 87171939 | 4.04  |
| chr8 | 87175763 | 87178635 | 4.37  |
| chr8 | 87180168 | 87181187 | 4.04  |
| chr8 | 87186088 | 87187609 | 4.37  |
| chr8 | 87187896 | 87189366 | 3.36  |
| chr8 | 87192325 | 87195505 | 6.05  |
| chr8 | 87198122 | 87206291 | 9.42  |
| chr8 | 87207228 | 87208425 | 3.7   |
| chr8 | 87209958 | 87216578 | 5.05  |
| chr8 | 87216947 | 87218600 | 3.7   |
| chr8 | 87220201 | 87222655 | 3.7   |
| chr8 | 87224614 | 87225562 | 4.04  |
| chr8 | 87226112 | 87230496 | 4.04  |
| chr8 | 87230940 | 87232405 | 3.7   |
| chr8 | 87234018 | 87234915 | 3.7   |
| chr8 | 87235918 | 87238753 | 4.71  |
| chr8 | 87240806 | 87242849 | 4.37  |
| chr8 | 87244345 | 87255660 | 9.42  |
| chr8 | 87256970 | 87266898 | 12.11 |
| chr8 | 87269563 | 87272630 | 5.72  |
| chr8 | 87272988 | 87278745 | 11.77 |
| chr8 | 87279163 | 87280716 | 3.36  |
| chr8 | 87282089 | 87283277 | 4.37  |
| chr8 | 87284440 | 87299629 | 28.93 |
| chr8 | 87299845 | 87300892 | 4.04  |

|      |          |          |      |
|------|----------|----------|------|
| chr8 | 87301453 | 87305128 | 4.04 |
| chr8 | 87305879 | 87307121 | 4.04 |
| chr8 | 87308011 | 87309826 | 4.04 |
| chr8 | 87310782 | 87311761 | 4.04 |
| chr8 | 87312494 | 87313978 | 5.38 |
| chr8 | 87317734 | 87318717 | 3.7  |
| chr8 | 87320096 | 87321635 | 5.05 |
| chr8 | 87322027 | 87323393 | 4.04 |
| chr8 | 87326985 | 87330546 | 5.05 |
| chr8 | 87331829 | 87335063 | 4.37 |
| chr8 | 87339009 | 87339834 | 3.7  |
| chr8 | 87340479 | 87344267 | 4.04 |
| chr8 | 87345005 | 87350188 | 5.38 |
| chr8 | 87353273 | 87357712 | 5.72 |
| chr8 | 87361550 | 87362848 | 5.05 |
| chr8 | 87367545 | 87369737 | 4.04 |
| chr8 | 87374423 | 87375871 | 3.7  |
| chr8 | 87377164 | 87378041 | 3.36 |
| chr8 | 87378294 | 87379562 | 4.37 |
| chr8 | 87384553 | 87386178 | 4.71 |
| chr8 | 87393190 | 87394105 | 3.7  |
| chr8 | 87397476 | 87398290 | 3.36 |
| chr8 | 87398804 | 87399597 | 3.36 |
| chr8 | 87425193 | 87427174 | 4.04 |
| chr8 | 87427526 | 87428774 | 3.03 |
| chr8 | 87429567 | 87430582 | 4.37 |
| chr8 | 87460195 | 87461156 | 4.04 |
| chr8 | 87464824 | 87466099 | 4.37 |
| chr8 | 87467163 | 87468375 | 4.04 |
| chr8 | 87480676 | 87481569 | 3.36 |
| chr8 | 87486381 | 87487890 | 3.7  |
| chr8 | 87506762 | 87509844 | 9.08 |
| chr8 | 87515355 | 87516379 | 3.7  |
| chr8 | 87518297 | 87519126 | 3.36 |
| chr8 | 87519876 | 87523516 | 4.37 |
| chr8 | 87525868 | 87527774 | 5.38 |
| chr8 | 87552256 | 87553280 | 4.37 |
| chr8 | 87555229 | 87556280 | 3.7  |
| chr8 | 87565206 | 87566527 | 4.04 |
| chr8 | 87568615 | 87569957 | 5.05 |
| chr8 | 87577705 | 87578657 | 4.37 |
| chr8 | 87580553 | 87581590 | 3.36 |
| chr8 | 87597556 | 87598546 | 3.7  |

|      |          |          |      |
|------|----------|----------|------|
| chr8 | 87615133 | 87616125 | 3.7  |
| chr8 | 87624359 | 87625605 | 3.7  |
| chr8 | 87630294 | 87632409 | 4.04 |
| chr8 | 87640334 | 87641553 | 4.04 |
| chr8 | 87651442 | 87652832 | 3.7  |
| chr8 | 87664051 | 87665125 | 4.04 |
| chr8 | 87666903 | 87668408 | 3.7  |
| chr8 | 87671014 | 87672428 | 3.7  |
| chr8 | 87672663 | 87673930 | 4.04 |
| chr8 | 87696824 | 87697775 | 3.36 |
| chr8 | 87703177 | 87705735 | 6.05 |
| chr8 | 87715617 | 87716437 | 4.04 |
| chr8 | 87722204 | 87723090 | 3.36 |
| chr8 | 87727185 | 87729310 | 4.04 |
| chr8 | 87733745 | 87734498 | 3.36 |
| chr8 | 87752028 | 87753076 | 4.04 |
| chr8 | 87754157 | 87758033 | 5.38 |
| chr8 | 87758271 | 87759141 | 3.7  |
| chr8 | 87776535 | 87778162 | 3.7  |
| chr8 | 87780582 | 87781727 | 4.04 |
| chr8 | 87788437 | 87790774 | 3.7  |
| chr8 | 87791542 | 87793195 | 4.04 |
| chr8 | 87803836 | 87804905 | 3.36 |
| chr8 | 87833494 | 87834900 | 5.05 |
| chr8 | 87850785 | 87853107 | 4.71 |
| chr8 | 87862899 | 87863952 | 4.04 |
| chr8 | 87883271 | 87884195 | 3.7  |
| chr8 | 87893427 | 87894741 | 4.04 |
| chr8 | 87898366 | 87899737 | 4.04 |
| chr8 | 87901421 | 87902683 | 4.37 |
| chr8 | 87907360 | 87908524 | 4.37 |
| chr8 | 87908779 | 87910210 | 4.04 |
| chr8 | 87912467 | 87914246 | 4.04 |
| chr8 | 87916597 | 87920709 | 5.05 |
| chr8 | 87921676 | 87923637 | 4.04 |
| chr8 | 87926618 | 87928988 | 5.38 |
| chr8 | 87930280 | 87933522 | 5.38 |
| chr8 | 87934620 | 87935850 | 4.04 |
| chr8 | 87936102 | 87937720 | 4.04 |
| chr8 | 87938545 | 87939343 | 3.7  |
| chr8 | 87964791 | 87966657 | 4.04 |
| chr8 | 87973539 | 87980837 | 5.72 |
| chr8 | 87991581 | 87998417 | 8.07 |

|      |          |          |      |
|------|----------|----------|------|
| chr8 | 87999378 | 88000668 | 5.05 |
| chr8 | 88002024 | 88003674 | 4.71 |
| chr8 | 88004129 | 88012143 | 5.05 |
| chr8 | 88012687 | 88016510 | 4.71 |
| chr8 | 88017433 | 88018502 | 3.7  |
| chr8 | 88019314 | 88021273 | 3.7  |
| chr8 | 88022582 | 88024199 | 5.38 |
| chr8 | 88036735 | 88038875 | 4.37 |
| chr8 | 88039553 | 88041463 | 5.05 |
| chr8 | 88044476 | 88048536 | 5.72 |
| chr8 | 88048766 | 88055943 | 5.38 |
| chr8 | 88059787 | 88063479 | 5.05 |
| chr8 | 88063796 | 88074401 | 8.07 |
| chr8 | 88076805 | 88078261 | 3.7  |
| chr8 | 88082704 | 88083658 | 3.7  |
| chr8 | 88084654 | 88086147 | 4.37 |
| chr8 | 88086710 | 88088758 | 3.36 |
| chr8 | 88090375 | 88092544 | 4.04 |
| chr8 | 88092920 | 88094238 | 4.04 |
| chr8 | 88094511 | 88095487 | 3.36 |
| chr8 | 88096061 | 88097042 | 4.37 |
| chr8 | 88098063 | 88099376 | 4.71 |
| chr8 | 88101447 | 88102455 | 3.7  |
| chr8 | 88105529 | 88107138 | 3.03 |
| chr8 | 88109627 | 88110727 | 3.03 |
| chr8 | 88112637 | 88113607 | 3.03 |
| chr8 | 88130613 | 88132035 | 4.04 |
| chr8 | 88133601 | 88136965 | 4.37 |
| chr8 | 88141203 | 88142465 | 4.37 |
| chr8 | 88161303 | 88163385 | 4.37 |
| chr8 | 88174223 | 88175732 | 3.36 |
| chr8 | 88177671 | 88179440 | 4.37 |
| chr8 | 88186453 | 88187590 | 3.36 |
| chr8 | 88193907 | 88196754 | 4.04 |
| chr8 | 88209700 | 88211536 | 3.03 |
| chr8 | 88221106 | 88223123 | 4.71 |
| chr8 | 88224685 | 88225598 | 3.36 |
| chr8 | 88226187 | 88230151 | 4.71 |
| chr8 | 88233465 | 88234363 | 3.36 |
| chr8 | 88241852 | 88242739 | 4.04 |
| chr8 | 88243056 | 88244356 | 4.04 |
| chr8 | 88252273 | 88253490 | 5.38 |
| chr8 | 88259660 | 88261021 | 4.71 |

|      |          |          |       |
|------|----------|----------|-------|
| chr8 | 88261888 | 88263454 | 4.37  |
| chr8 | 88264672 | 88267026 | 5.05  |
| chr8 | 88267447 | 88268296 | 3.7   |
| chr8 | 88269445 | 88275206 | 13.79 |
| chr8 | 88278729 | 88281854 | 4.71  |
| chr8 | 88317120 | 88318937 | 3.7   |
| chr8 | 88325509 | 88327812 | 4.04  |
| chr8 | 88330214 | 88330985 | 3.36  |
| chr8 | 88342197 | 88343061 | 3.7   |
| chr8 | 88348255 | 88349220 | 3.7   |
| chr8 | 88349561 | 88350545 | 3.36  |
| chr8 | 88351999 | 88354162 | 4.71  |
| chr8 | 88354418 | 88356658 | 5.72  |
| chr8 | 88357324 | 88358300 | 3.36  |
| chr8 | 88364814 | 88366561 | 4.37  |
| chr8 | 88367312 | 88370906 | 5.72  |
| chr8 | 88378023 | 88379264 | 4.04  |
| chr8 | 88404101 | 88405527 | 4.04  |
| chr8 | 88405765 | 88407138 | 4.04  |
| chr8 | 88408473 | 88409807 | 3.7   |
| chr8 | 88420343 | 88421583 | 3.7   |
| chr8 | 88423923 | 88425502 | 4.04  |
| chr8 | 88438848 | 88439849 | 3.36  |
| chr8 | 88455375 | 88456271 | 3.36  |
| chr8 | 88457042 | 88458601 | 4.04  |
| chr8 | 88460610 | 88461855 | 4.71  |
| chr8 | 88466417 | 88467413 | 3.36  |
| chr8 | 88478683 | 88479434 | 3.7   |
| chr8 | 88500098 | 88501311 | 4.37  |
| chr8 | 88510393 | 88512292 | 4.71  |
| chr8 | 88522320 | 88524256 | 3.7   |
| chr8 | 88526441 | 88529626 | 6.73  |
| chr8 | 88553864 | 88555811 | 5.05  |
| chr8 | 88569324 | 88570099 | 3.7   |
| chr8 | 88575530 | 88578452 | 4.04  |
| chr8 | 88580065 | 88585557 | 7.74  |
| chr8 | 88586501 | 88587935 | 3.03  |
| chr8 | 88595450 | 88596877 | 3.36  |
| chr8 | 88597642 | 88598692 | 4.37  |
| chr8 | 88599049 | 88600318 | 3.7   |
| chr8 | 88600902 | 88602684 | 4.37  |
| chr8 | 88607858 | 88608679 | 4.04  |
| chr8 | 88610966 | 88613377 | 4.04  |



|      |          |          |      |
|------|----------|----------|------|
| chr8 | 88618769 | 88620038 | 5.05 |
| chr8 | 88629473 | 88630446 | 4.04 |
| chr8 | 88633000 | 88634775 | 4.04 |
| chr8 | 88635583 | 88636407 | 3.7  |
| chr8 | 88646656 | 88652565 | 4.71 |
| chr8 | 88659991 | 88661131 | 4.04 |
| chr8 | 88671435 | 88672781 | 4.71 |
| chr8 | 88679135 | 88680579 | 4.04 |
| chr8 | 88681624 | 88683610 | 4.04 |
| chr8 | 88687580 | 88689678 | 7.4  |
| chr8 | 88692015 | 88692869 | 3.36 |
| chr8 | 88693448 | 88694893 | 4.04 |
| chr8 | 88702587 | 88703446 | 3.03 |
| chr8 | 88705418 | 88706409 | 3.7  |
| chr8 | 88713903 | 88719689 | 7.06 |
| chr8 | 88724229 | 88725126 | 3.36 |
| chr8 | 88728751 | 88732795 | 5.38 |
| chr8 | 88735298 | 88736953 | 3.7  |
| chr8 | 88738093 | 88739557 | 4.04 |
| chr8 | 88750065 | 88754089 | 4.37 |
| chr8 | 88755787 | 88756863 | 3.36 |
| chr8 | 88758188 | 88760584 | 4.37 |
| chr8 | 88760805 | 88765163 | 4.04 |
| chr8 | 88769934 | 88772579 | 3.36 |
| chr8 | 88791287 | 88792732 | 4.04 |
| chr8 | 88793309 | 88802276 | 9.42 |
| chr8 | 88803204 | 88806772 | 4.04 |
| chr8 | 88813321 | 88814445 | 3.36 |
| chr8 | 88858756 | 88860354 | 3.36 |
| chr8 | 88874231 | 88875320 | 3.7  |
| chr8 | 88880118 | 88881873 | 4.71 |
| chr8 | 88883090 | 88884351 | 3.7  |
| chr8 | 88895307 | 88896169 | 2.35 |
| chr8 | 88898312 | 88899264 | 3.7  |
| chr8 | 88913302 | 88914173 | 3.36 |
| chr8 | 88917515 | 88918740 | 4.37 |
| chr8 | 88921029 | 88922273 | 3.36 |
| chr8 | 88929393 | 88930652 | 4.37 |
| chr8 | 88931446 | 88933724 | 4.04 |
| chr8 | 88937401 | 88938217 | 3.36 |
| chr8 | 88945375 | 88946492 | 4.37 |
| chr8 | 88948866 | 88949916 | 3.7  |
| chr8 | 88951617 | 88961590 | 8.07 |

|      |          |          |      |
|------|----------|----------|------|
| chr8 | 88967229 | 88969821 | 4.37 |
| chr8 | 88970171 | 88971589 | 4.04 |
| chr8 | 88978179 | 88979260 | 3.7  |
| chr8 | 88979801 | 88981290 | 3.7  |
| chr8 | 88985556 | 88987044 | 3.36 |
| chr8 | 88987865 | 88988710 | 3.03 |
| chr8 | 89012177 | 89013743 | 3.03 |
| chr8 | 89017347 | 89019805 | 3.7  |
| chr8 | 89021582 | 89023676 | 5.38 |
| chr8 | 89029232 | 89030391 | 3.7  |
| chr8 | 89034977 | 89036071 | 3.7  |
| chr8 | 89037644 | 89038689 | 4.37 |
| chr8 | 89057229 | 89058259 | 3.7  |
| chr8 | 89060660 | 89061742 | 4.37 |
| chr8 | 89071092 | 89072064 | 4.37 |
| chr8 | 89079531 | 89080902 | 4.71 |
| chr8 | 89095299 | 89096308 | 3.7  |
| chr8 | 89101482 | 89102290 | 2.35 |
| chr8 | 89109246 | 89110593 | 3.36 |
| chr8 | 89114750 | 89116465 | 3.36 |
| chr8 | 89122756 | 89124047 | 5.05 |
| chr8 | 89129709 | 89132952 | 3.36 |
| chr8 | 89160004 | 89161012 | 3.7  |
| chr8 | 89181218 | 89182335 | 3.7  |
| chr8 | 89206890 | 89208019 | 4.04 |
| chr8 | 89219412 | 89220810 | 3.36 |
| chr8 | 89251895 | 89252837 | 2.02 |
| chr8 | 89277235 | 89278109 | 3.36 |
| chr8 | 89331623 | 89333848 | 5.05 |
| chr8 | 89338423 | 89341800 | 6.05 |
| chr8 | 89348936 | 89349921 | 3.7  |
| chr8 | 89352819 | 89353985 | 3.36 |
| chr8 | 89358425 | 89362861 | 6.05 |
| chr8 | 89363101 | 89364932 | 4.37 |
| chr8 | 89375720 | 89377468 | 4.04 |
| chr8 | 89378109 | 89382483 | 4.71 |
| chr8 | 89385544 | 89388010 | 4.71 |
| chr8 | 89397564 | 89398833 | 3.7  |
| chr8 | 89406638 | 89410380 | 5.05 |
| chr8 | 89420893 | 89424158 | 3.36 |
| chr8 | 89426076 | 89428823 | 5.05 |
| chr8 | 89436492 | 89438011 | 3.36 |
| chr8 | 89443373 | 89445487 | 6.39 |

|      |          |          |      |
|------|----------|----------|------|
| chr8 | 89446086 | 89447742 | 4.37 |
| chr8 | 89449251 | 89452029 | 4.37 |
| chr8 | 89461625 | 89463916 | 3.7  |
| chr8 | 89466538 | 89467958 | 3.7  |
| chr8 | 89473483 | 89475050 | 5.38 |
| chr8 | 89482035 | 89488798 | 4.71 |
| chr8 | 89492553 | 89495023 | 6.05 |
| chr8 | 89512944 | 89514202 | 3.36 |
| chr8 | 89516594 | 89518587 | 3.7  |
| chr8 | 89519053 | 89520616 | 7.4  |
| chr8 | 89523227 | 89524558 | 4.04 |
| chr8 | 89540832 | 89541794 | 4.04 |
| chr8 | 89551002 | 89551776 | 3.36 |
| chr8 | 89552837 | 89554473 | 3.7  |
| chr8 | 89558999 | 89562658 | 5.05 |
| chr8 | 89566329 | 89567471 | 3.36 |
| chr8 | 89573048 | 89573993 | 3.36 |
| chr8 | 89577626 | 89578755 | 4.37 |
| chr8 | 89585482 | 89586535 | 3.7  |
| chr8 | 89613618 | 89614371 | 3.36 |
| chr8 | 89631007 | 89632096 | 4.37 |
| chr8 | 89632337 | 89633607 | 4.37 |
| chr8 | 89641615 | 89642872 | 5.38 |
| chr8 | 89649182 | 89650813 | 4.04 |
| chr8 | 89656721 | 89657808 | 3.7  |
| chr8 | 89668638 | 89669460 | 3.36 |
| chr8 | 89671222 | 89676707 | 4.71 |
| chr8 | 89697091 | 89698101 | 3.7  |
| chr8 | 89705422 | 89708212 | 4.37 |
| chr8 | 89713497 | 89714307 | 4.71 |
| chr8 | 89714826 | 89716392 | 3.7  |
| chr8 | 89732134 | 89733508 | 3.36 |
| chr8 | 89735021 | 89738023 | 4.37 |
| chr8 | 89743927 | 89744776 | 4.04 |
| chr8 | 89761691 | 89762562 | 2.35 |
| chr8 | 89781307 | 89782832 | 3.36 |
| chr8 | 89787991 | 89788871 | 4.04 |
| chr8 | 89833786 | 89835304 | 3.03 |
| chr8 | 89836245 | 89837290 | 4.04 |
| chr8 | 89841242 | 89842268 | 3.36 |
| chr8 | 89843585 | 89844550 | 3.03 |
| chr8 | 89918891 | 89920595 | 3.36 |
| chr8 | 89941477 | 89942452 | 3.7  |

|      |          |          |      |
|------|----------|----------|------|
| chr8 | 89964979 | 89966492 | 3.36 |
| chr8 | 89972960 | 89974085 | 4.37 |
| chr8 | 89975527 | 89976715 | 4.37 |
| chr8 | 89993200 | 89994544 | 3.7  |
| chr8 | 90032416 | 90033529 | 3.36 |
| chr8 | 90043374 | 90047388 | 4.37 |
| chr8 | 90052383 | 90053660 | 3.7  |
| chr8 | 90054200 | 90055043 | 3.36 |
| chr8 | 90055461 | 90058145 | 6.73 |
| chr8 | 90065738 | 90066823 | 3.36 |
| chr8 | 90072987 | 90073957 | 3.7  |
| chr8 | 90082775 | 90086475 | 4.37 |
| chr8 | 90097685 | 90098548 | 3.36 |
| chr8 | 90116259 | 90117389 | 3.7  |
| chr8 | 90119990 | 90121718 | 4.37 |
| chr8 | 90122251 | 90124002 | 7.06 |
| chr8 | 90132651 | 90134301 | 3.36 |
| chr8 | 90149077 | 90149915 | 3.7  |
| chr8 | 90151529 | 90152344 | 3.36 |
| chr8 | 90157145 | 90158300 | 4.71 |
| chr8 | 90190459 | 90191986 | 3.03 |
| chr8 | 90198944 | 90200605 | 3.7  |
| chr8 | 90221221 | 90222125 | 3.7  |
| chr8 | 90222570 | 90225362 | 4.71 |
| chr8 | 90227989 | 90229453 | 4.71 |
| chr8 | 90237546 | 90238487 | 3.7  |
| chr8 | 90259294 | 90262172 | 4.37 |
| chr8 | 90264964 | 90266079 | 4.04 |
| chr8 | 90290982 | 90293463 | 4.37 |
| chr8 | 90297953 | 90299236 | 3.7  |
| chr8 | 90319178 | 90320063 | 3.7  |
| chr8 | 90335341 | 90336254 | 3.7  |
| chr8 | 90338074 | 90339336 | 2.35 |
| chr8 | 90343203 | 90344795 | 3.7  |
| chr8 | 90346599 | 90347860 | 5.05 |
| chr8 | 90351179 | 90353190 | 5.38 |
| chr8 | 90397799 | 90398974 | 3.36 |
| chr8 | 90400690 | 90401798 | 3.36 |
| chr8 | 90413516 | 90415244 | 3.7  |
| chr8 | 90418392 | 90419351 | 3.7  |
| chr8 | 90426499 | 90428943 | 3.7  |
| chr8 | 90457795 | 90460157 | 3.36 |
| chr8 | 90465739 | 90466762 | 3.7  |

|      |          |          |      |
|------|----------|----------|------|
| chr8 | 90468546 | 90470090 | 4.37 |
| chr8 | 90494409 | 90495427 | 3.36 |
| chr8 | 90504331 | 90506824 | 3.36 |
| chr8 | 90515666 | 90516490 | 4.37 |
| chr8 | 90517383 | 90521568 | 4.71 |
| chr8 | 90525918 | 90527381 | 3.7  |
| chr8 | 90531809 | 90532669 | 3.03 |
| chr8 | 90543480 | 90544652 | 4.04 |
| chr8 | 90545450 | 90546366 | 2.69 |
| chr8 | 90553442 | 90554367 | 4.04 |
| chr8 | 90559899 | 90560810 | 3.03 |
| chr8 | 90570123 | 90572214 | 4.04 |
| chr8 | 90572644 | 90575051 | 4.37 |
| chr8 | 90579087 | 90581552 | 4.37 |
| chr8 | 90584819 | 90586108 | 4.37 |
| chr8 | 90586809 | 90589594 | 3.7  |
| chr8 | 90598651 | 90599559 | 3.7  |
| chr8 | 90600500 | 90601966 | 4.04 |
| chr8 | 90615533 | 90616683 | 3.7  |
| chr8 | 90617755 | 90619451 | 3.7  |
| chr8 | 90632844 | 90634045 | 3.7  |
| chr8 | 90636364 | 90637245 | 4.37 |
| chr8 | 90644642 | 90645754 | 4.04 |
| chr8 | 90657060 | 90657832 | 2.69 |
| chr8 | 90659702 | 90661262 | 3.36 |
| chr8 | 90661495 | 90667023 | 5.05 |
| chr8 | 90673377 | 90677807 | 9.42 |
| chr8 | 90680244 | 90682252 | 4.71 |
| chr8 | 90690414 | 90692650 | 4.37 |
| chr8 | 90701005 | 90702568 | 3.7  |
| chr8 | 90712428 | 90713695 | 6.39 |
| chr8 | 90726891 | 90730808 | 4.37 |
| chr8 | 90736182 | 90737511 | 4.04 |
| chr8 | 90738882 | 90741814 | 3.7  |
| chr8 | 90743673 | 90746859 | 5.72 |
| chr8 | 90747753 | 90749199 | 5.38 |
| chr8 | 90751522 | 90752931 | 3.36 |
| chr8 | 90755024 | 90760578 | 6.73 |
| chr8 | 90761884 | 90763128 | 5.05 |
| chr8 | 90763763 | 90764743 | 4.37 |
| chr8 | 90768644 | 90773196 | 5.72 |
| chr8 | 90802122 | 90803084 | 1.68 |
| chr8 | 90808301 | 90810910 | 4.37 |

|      |          |          |      |
|------|----------|----------|------|
| chr8 | 90811894 | 90815595 | 6.39 |
| chr8 | 90816213 | 90818151 | 4.04 |
| chr8 | 90818764 | 90820180 | 3.36 |
| chr8 | 90820844 | 90821667 | 3.36 |
| chr8 | 90822824 | 90824087 | 3.36 |
| chr8 | 90830000 | 90831042 | 3.7  |
| chr8 | 90834455 | 90836187 | 5.05 |
| chr8 | 90844451 | 90845315 | 3.36 |
| chr8 | 90846412 | 90847858 | 4.71 |
| chr8 | 90848912 | 90850067 | 3.7  |
| chr8 | 90857104 | 90857799 | 3.03 |
| chr8 | 90861269 | 90862372 | 4.37 |
| chr8 | 90870364 | 90871675 | 4.37 |
| chr8 | 90876940 | 90878044 | 4.04 |
| chr8 | 90887458 | 90888791 | 3.7  |
| chr8 | 90893405 | 90895828 | 6.73 |
| chr8 | 90897594 | 90898683 | 3.36 |
| chr8 | 90899658 | 90902510 | 4.04 |
| chr8 | 90904110 | 90906490 | 4.04 |
| chr8 | 90907441 | 90908686 | 3.7  |
| chr8 | 90912998 | 90916861 | 5.38 |
| chr8 | 90919625 | 90921726 | 5.72 |
| chr8 | 90924491 | 90928313 | 4.04 |
| chr8 | 90928966 | 90931095 | 5.05 |
| chr8 | 90931959 | 90933121 | 4.37 |
| chr8 | 90933370 | 90934070 | 3.7  |
| chr8 | 90935503 | 90936667 | 3.7  |
| chr8 | 90937685 | 90938489 | 3.36 |
| chr8 | 90940626 | 90942095 | 4.71 |
| chr8 | 90942936 | 90945203 | 4.04 |
| chr8 | 90957128 | 90959466 | 4.37 |
| chr8 | 90959760 | 90960697 | 4.71 |
| chr8 | 90994119 | 90998001 | 6.05 |
| chr8 | 91001482 | 91003943 | 5.05 |
| chr8 | 91007164 | 91008552 | 3.36 |
| chr8 | 91012425 | 91014413 | 6.05 |
| chr8 | 91020661 | 91021782 | 4.37 |
| chr8 | 91040019 | 91041412 | 3.36 |
| chr8 | 91054120 | 91055369 | 4.04 |
| chr8 | 91073592 | 91075064 | 4.37 |
| chr8 | 91087670 | 91089042 | 4.04 |
| chr8 | 91093041 | 91095651 | 5.38 |
| chr8 | 91096847 | 91097745 | 4.04 |

|      |          |          |       |
|------|----------|----------|-------|
| chr8 | 91099071 | 91099939 | 3.36  |
| chr8 | 91108141 | 91111070 | 3.7   |
| chr8 | 91112501 | 91113778 | 3.7   |
| chr8 | 91120434 | 91121705 | 4.04  |
| chr8 | 91122538 | 91124029 | 3.36  |
| chr8 | 91130780 | 91132058 | 3.7   |
| chr8 | 91138377 | 91140531 | 6.05  |
| chr8 | 91142493 | 91143551 | 3.36  |
| chr8 | 91145529 | 91146553 | 3.7   |
| chr8 | 91147257 | 91148707 | 4.04  |
| chr8 | 91149115 | 91153687 | 18.84 |
| chr8 | 91155396 | 91156449 | 4.04  |
| chr8 | 91174362 | 91176411 | 4.04  |
| chr8 | 91183825 | 91184742 | 3.03  |
| chr8 | 91190558 | 91191902 | 4.04  |
| chr8 | 91199447 | 91202739 | 4.71  |
| chr8 | 91207824 | 91208579 | 3.03  |
| chr8 | 91210650 | 91211560 | 3.7   |
| chr8 | 91212334 | 91215154 | 5.72  |
| chr8 | 91226565 | 91227723 | 3.03  |
| chr8 | 91233146 | 91234214 | 3.36  |
| chr8 | 91237155 | 91238094 | 3.7   |
| chr8 | 91242139 | 91242960 | 3.36  |
| chr8 | 91245972 | 91246954 | 4.37  |
| chr8 | 91250842 | 91251675 | 3.36  |
| chr8 | 91260718 | 91261880 | 4.04  |
| chr8 | 91296190 | 91297750 | 3.7   |
| chr8 | 91300888 | 91302437 | 4.04  |
| chr8 | 91304217 | 91305113 | 3.7   |
| chr8 | 91308187 | 91309281 | 3.36  |
| chr8 | 91312810 | 91314287 | 3.7   |
| chr8 | 91317680 | 91318583 | 3.36  |
| chr8 | 91321430 | 91323593 | 4.04  |
| chr8 | 91329216 | 91333386 | 4.04  |
| chr8 | 91336024 | 91337939 | 4.71  |
| chr8 | 91338373 | 91339262 | 3.03  |
| chr8 | 91341891 | 91343494 | 3.7   |
| chr8 | 91349858 | 91353867 | 5.72  |
| chr8 | 91355800 | 91357796 | 3.7   |
| chr8 | 91363222 | 91364075 | 3.7   |
| chr8 | 91370584 | 91372515 | 3.7   |
| chr8 | 91373030 | 91375120 | 4.37  |
| chr8 | 91375663 | 91377252 | 4.04  |

|      |          |          |       |
|------|----------|----------|-------|
| chr8 | 91377747 | 91379097 | 4.37  |
| chr8 | 91383061 | 91386047 | 4.04  |
| chr8 | 91393788 | 91395688 | 4.37  |
| chr8 | 91396501 | 91399068 | 3.36  |
| chr8 | 91415152 | 91419122 | 4.71  |
| chr8 | 91424240 | 91425923 | 4.04  |
| chr8 | 91429493 | 91433021 | 5.72  |
| chr8 | 91433240 | 91434723 | 3.7   |
| chr8 | 91437995 | 91441506 | 4.37  |
| chr8 | 91446763 | 91448175 | 4.04  |
| chr8 | 91454380 | 91455429 | 4.04  |
| chr8 | 91465831 | 91468371 | 3.7   |
| chr8 | 91471842 | 91472799 | 3.36  |
| chr8 | 91478194 | 91479408 | 3.36  |
| chr8 | 91484572 | 91485628 | 4.04  |
| chr8 | 91490855 | 91492002 | 4.04  |
| chr8 | 91495409 | 91496883 | 5.05  |
| chr8 | 91505246 | 91506240 | 3.36  |
| chr8 | 91522514 | 91523993 | 4.04  |
| chr8 | 91526329 | 91527377 | 4.37  |
| chr8 | 91532295 | 91533810 | 4.04  |
| chr8 | 91552593 | 91554702 | 4.71  |
| chr8 | 91566206 | 91568440 | 4.37  |
| chr8 | 91574880 | 91576311 | 3.03  |
| chr8 | 91577153 | 91578695 | 3.7   |
| chr8 | 91580234 | 91581919 | 4.04  |
| chr8 | 91583993 | 91585390 | 4.37  |
| chr8 | 91585903 | 91587208 | 4.04  |
| chr8 | 91592406 | 91593444 | 4.04  |
| chr8 | 91605002 | 91607258 | 4.71  |
| chr8 | 91610084 | 91611589 | 3.7   |
| chr8 | 91612673 | 91613526 | 4.04  |
| chr8 | 91614241 | 91615800 | 4.04  |
| chr8 | 91620586 | 91623838 | 5.72  |
| chr8 | 91625756 | 91632111 | 6.73  |
| chr8 | 91639787 | 91640803 | 3.7   |
| chr8 | 91641135 | 91642657 | 3.36  |
| chr8 | 91648794 | 91650712 | 4.04  |
| chr8 | 91651691 | 91659969 | 6.73  |
| chr8 | 91661226 | 91671595 | 12.45 |
| chr8 | 91672341 | 91675846 | 4.04  |
| chr8 | 91676297 | 91681903 | 6.73  |
| chr8 | 91682618 | 91684664 | 4.04  |



|      |          |          |      |
|------|----------|----------|------|
| chr8 | 91689761 | 91690797 | 3.7  |
| chr8 | 91691331 | 91692203 | 3.36 |
| chr8 | 91694223 | 91695059 | 4.37 |
| chr8 | 91702482 | 91703858 | 3.7  |
| chr8 | 91704090 | 91705600 | 4.04 |
| chr8 | 91707063 | 91709379 | 3.7  |
| chr8 | 91709601 | 91711457 | 5.38 |
| chr8 | 91712979 | 91713864 | 3.36 |
| chr8 | 91720020 | 91721557 | 4.04 |
| chr8 | 91722218 | 91723768 | 5.38 |
| chr8 | 91725104 | 91726499 | 4.04 |
| chr8 | 91728204 | 91730607 | 5.72 |
| chr8 | 91733315 | 91735280 | 4.71 |
| chr8 | 91736063 | 91737093 | 3.36 |
| chr8 | 91738335 | 91740670 | 4.37 |
| chr8 | 91746367 | 91749023 | 6.39 |
| chr8 | 91750291 | 91752523 | 4.71 |
| chr8 | 91755774 | 91757434 | 4.37 |
| chr8 | 91758413 | 91764357 | 5.72 |
| chr8 | 91765317 | 91766204 | 3.03 |
| chr8 | 91774716 | 91775883 | 4.37 |
| chr8 | 91778865 | 91781124 | 4.37 |
| chr8 | 91782450 | 91784144 | 3.36 |
| chr8 | 91785325 | 91791449 | 6.73 |
| chr8 | 91802539 | 91804859 | 4.37 |
| chr8 | 91809395 | 91812676 | 4.37 |
| chr8 | 91858228 | 91860317 | 6.39 |
| chr8 | 91861180 | 91861999 | 3.36 |
| chr8 | 91864729 | 91867152 | 5.05 |
| chr8 | 91870445 | 91873486 | 6.39 |
| chr8 | 91879286 | 91880182 | 3.36 |
| chr8 | 91882227 | 91883555 | 3.7  |
| chr8 | 91894396 | 91895606 | 4.04 |
| chr8 | 91899234 | 91902347 | 4.37 |
| chr8 | 91911843 | 91912786 | 3.7  |
| chr8 | 91921595 | 91923033 | 3.7  |
| chr8 | 91924204 | 91925638 | 4.71 |
| chr8 | 91925967 | 91928046 | 3.7  |
| chr8 | 91931802 | 91932585 | 3.7  |
| chr8 | 91938469 | 91939438 | 4.04 |
| chr8 | 91972932 | 91977311 | 6.39 |
| chr8 | 92025414 | 92029527 | 5.72 |
| chr8 | 92039909 | 92040756 | 4.04 |

|      |          |          |       |
|------|----------|----------|-------|
| chr8 | 92052621 | 92053960 | 4.04  |
| chr8 | 92067482 | 92068443 | 3.7   |
| chr8 | 92081896 | 92083703 | 5.05  |
| chr8 | 92138417 | 92139729 | 3.36  |
| chr8 | 92257350 | 92258882 | 3.03  |
| chr8 | 92317654 | 92319115 | 4.04  |
| chr8 | 92387663 | 92388721 | 3.03  |
| chr8 | 92406623 | 92407593 | 3.36  |
| chr8 | 92456936 | 92457743 | 3.36  |
| chr8 | 92513614 | 92517898 | 17.15 |
| chr8 | 92527349 | 92528197 | 4.04  |
| chr8 | 92546135 | 92548265 | 4.37  |
| chr8 | 92557121 | 92559026 | 4.37  |
| chr8 | 92560068 | 92561173 | 3.7   |
| chr8 | 92568568 | 92570820 | 3.7   |
| chr8 | 92624074 | 92625489 | 5.05  |
| chr8 | 92658582 | 92659815 | 3.36  |
| chr8 | 92690626 | 92691654 | 3.36  |
| chr8 | 92695551 | 92696831 | 2.35  |
| chr8 | 92830104 | 92830996 | 3.7   |
| chr8 | 92858515 | 92860022 | 3.03  |
| chr8 | 92921957 | 92923495 | 7.4   |
| chr8 | 92969779 | 92971075 | 5.05  |
| chr8 | 93075041 | 93076063 | 4.71  |
| chr8 | 93114769 | 93116223 | 4.04  |
| chr8 | 93209402 | 93210513 | 3.7   |
| chr8 | 93216369 | 93219050 | 14.13 |
| chr8 | 93219364 | 93220274 | 4.71  |
| chr8 | 93275652 | 93276401 | 4.37  |
| chr8 | 93295421 | 93296209 | 4.37  |
| chr8 | 93340607 | 93341577 | 4.04  |
| chr8 | 93345113 | 93347726 | 3.7   |
| chr8 | 93445104 | 93446970 | 4.71  |
| chr8 | 93485464 | 93486745 | 3.7   |
| chr8 | 93539667 | 93540763 | 3.7   |
| chr8 | 93545809 | 93546725 | 4.04  |
| chr8 | 93575011 | 93576488 | 4.04  |
| chr8 | 93598147 | 93599069 | 4.37  |
| chr8 | 93605786 | 93606812 | 3.7   |
| chr8 | 93649248 | 93650145 | 3.36  |
| chr8 | 93752134 | 93753580 | 3.7   |
| chr8 | 93795089 | 93795923 | 3.03  |
| chr8 | 93813349 | 93814219 | 4.04  |

|      |          |          |      |
|------|----------|----------|------|
| chr8 | 93838247 | 93839047 | 4.37 |
| chr8 | 93878770 | 93880107 | 4.04 |
| chr8 | 93926268 | 93927580 | 4.04 |
| chr8 | 93940511 | 93941368 | 3.36 |
| chr8 | 93950297 | 93956496 | 4.37 |
| chr8 | 93976282 | 93977729 | 4.04 |
| chr8 | 93985771 | 93990738 | 4.37 |
| chr8 | 94005001 | 94006500 | 4.37 |
| chr8 | 94012176 | 94013138 | 3.7  |
| chr8 | 94047864 | 94048874 | 4.37 |
| chr8 | 94049552 | 94050681 | 4.37 |
| chr8 | 94063037 | 94063871 | 3.36 |
| chr8 | 94072112 | 94073507 | 3.36 |
| chr8 | 94076466 | 94081292 | 5.38 |
| chr8 | 94108928 | 94109875 | 5.05 |
| chr8 | 94111525 | 94112539 | 3.36 |
| chr8 | 94114975 | 94116139 | 4.04 |
| chr8 | 94117882 | 94118809 | 3.36 |
| chr8 | 94132959 | 94134654 | 4.04 |
| chr8 | 94151158 | 94152320 | 4.71 |
| chr8 | 94153277 | 94154225 | 4.37 |
| chr8 | 94171868 | 94173069 | 4.71 |
| chr8 | 94181763 | 94183144 | 6.39 |
| chr8 | 94185540 | 94186627 | 3.03 |
| chr8 | 94187180 | 94188106 | 3.7  |
| chr8 | 94188365 | 94190171 | 4.04 |
| chr8 | 94199874 | 94200932 | 4.37 |
| chr8 | 94225490 | 94226515 | 4.04 |
| chr8 | 94253001 | 94255156 | 4.71 |
| chr8 | 94267691 | 94268868 | 4.37 |
| chr8 | 94296975 | 94298149 | 3.7  |
| chr8 | 94319122 | 94320250 | 4.37 |
| chr8 | 94325103 | 94326301 | 3.7  |
| chr8 | 94329343 | 94330827 | 4.37 |
| chr8 | 94343225 | 94344736 | 3.36 |
| chr8 | 94363111 | 94365331 | 4.04 |
| chr8 | 94395396 | 94396550 | 4.04 |
| chr8 | 94398914 | 94400294 | 3.03 |
| chr8 | 94416105 | 94417692 | 4.71 |
| chr8 | 94557682 | 94558592 | 3.36 |
| chr8 | 94592873 | 94594951 | 4.04 |
| chr8 | 94610509 | 94611610 | 4.04 |
| chr8 | 94624248 | 94625695 | 4.37 |

|      |          |          |       |
|------|----------|----------|-------|
| chr8 | 94657236 | 94666638 | 6.39  |
| chr8 | 94669216 | 94670940 | 4.37  |
| chr8 | 94674756 | 94676218 | 3.36  |
| chr8 | 94677918 | 94679489 | 3.7   |
| chr8 | 94686104 | 94688193 | 4.04  |
| chr8 | 94692561 | 94693429 | 3.36  |
| chr8 | 94706170 | 94707650 | 3.03  |
| chr8 | 94752094 | 94753472 | 3.7   |
| chr8 | 94835735 | 94836734 | 2.35  |
| chr8 | 94881036 | 94882242 | 4.71  |
| chr8 | 94917343 | 94921352 | 12.78 |
| chr8 | 94921570 | 94923339 | 5.05  |
| chr8 | 94929390 | 94931240 | 4.04  |
| chr8 | 94951956 | 94952926 | 4.37  |
| chr8 | 94992962 | 94994005 | 4.37  |
| chr8 | 94994885 | 94996199 | 5.05  |
| chr8 | 95003890 | 95004747 | 3.7   |
| chr8 | 95006646 | 95007439 | 4.04  |
| chr8 | 95009349 | 95010887 | 3.36  |
| chr8 | 95031299 | 95032417 | 4.37  |
| chr8 | 95039095 | 95040150 | 4.04  |
| chr8 | 95059396 | 95060417 | 3.7   |
| chr8 | 95071256 | 95072322 | 4.04  |
| chr8 | 95083768 | 95089094 | 9.75  |
| chr8 | 95091590 | 95092884 | 3.7   |
| chr8 | 95104235 | 95105700 | 4.71  |
| chr8 | 95117705 | 95118916 | 3.36  |
| chr8 | 95126622 | 95127851 | 4.71  |
| chr8 | 95155225 | 95156070 | 3.03  |
| chr8 | 95167554 | 95169675 | 5.38  |
| chr8 | 95170752 | 95172205 | 3.7   |
| chr8 | 95177672 | 95178696 | 4.04  |
| chr8 | 95204913 | 95205989 | 4.04  |
| chr8 | 95219264 | 95220204 | 3.36  |
| chr8 | 95225688 | 95226792 | 4.71  |
| chr8 | 95284118 | 95284981 | 3.03  |
| chr8 | 95416534 | 95418492 | 5.05  |
| chr8 | 95429661 | 95430861 | 5.05  |
| chr8 | 95448353 | 95449754 | 3.7   |
| chr8 | 95458599 | 95460394 | 4.04  |
| chr8 | 95469811 | 95470778 | 3.03  |
| chr8 | 95485187 | 95486184 | 3.36  |
| chr8 | 95486694 | 95488051 | 5.72  |

|      |          |          |      |
|------|----------|----------|------|
| chr8 | 95540320 | 95541613 | 4.71 |
| chr8 | 95564937 | 95566426 | 5.05 |
| chr8 | 95580946 | 95581763 | 3.7  |
| chr8 | 95588586 | 95590070 | 7.4  |
| chr8 | 95612913 | 95614065 | 3.7  |
| chr8 | 95624783 | 95625984 | 4.37 |
| chr8 | 95650384 | 95655583 | 5.38 |
| chr8 | 95731241 | 95733108 | 8.07 |
| chr8 | 95834433 | 95836647 | 6.39 |
| chr8 | 95908099 | 95909829 | 3.36 |
| chr8 | 95954272 | 95955303 | 4.04 |
| chr8 | 95996529 | 95997614 | 4.37 |
| chr8 | 96001320 | 96002333 | 3.7  |
| chr8 | 96002896 | 96006251 | 4.37 |
| chr8 | 96036194 | 96038026 | 5.38 |
| chr8 | 96078832 | 96080869 | 3.7  |
| chr8 | 96083436 | 96085404 | 4.04 |
| chr8 | 96087728 | 96088870 | 3.7  |
| chr8 | 96097248 | 96098288 | 3.36 |
| chr8 | 96099125 | 96100395 | 3.7  |
| chr8 | 96108100 | 96109526 | 4.37 |
| chr8 | 96111365 | 96113805 | 4.37 |
| chr8 | 96114319 | 96115698 | 3.03 |
| chr8 | 96115990 | 96117221 | 3.7  |
| chr8 | 96123892 | 96126237 | 5.05 |
| chr8 | 96134184 | 96136910 | 6.05 |
| chr8 | 96141733 | 96142971 | 3.7  |
| chr8 | 96144886 | 96148443 | 5.72 |
| chr8 | 96149520 | 96150646 | 4.04 |
| chr8 | 96180713 | 96181881 | 4.71 |
| chr8 | 96202616 | 96204253 | 4.37 |
| chr8 | 96204756 | 96206141 | 7.06 |
| chr8 | 96227272 | 96228140 | 3.36 |
| chr8 | 96236923 | 96238674 | 4.37 |
| chr8 | 96280576 | 96282527 | 5.05 |
| chr8 | 96289228 | 96290026 | 3.7  |
| chr8 | 96296221 | 96297042 | 3.7  |
| chr8 | 96334627 | 96335984 | 4.04 |
| chr8 | 96365611 | 96366648 | 3.7  |
| chr8 | 96379640 | 96380647 | 3.7  |
| chr8 | 96416401 | 96417393 | 4.37 |
| chr8 | 96446621 | 96447516 | 3.36 |
| chr8 | 96480936 | 96482112 | 4.37 |

|      |          |          |      |
|------|----------|----------|------|
| chr8 | 96482543 | 96483732 | 4.04 |
| chr8 | 96510176 | 96511153 | 3.7  |
| chr8 | 96542387 | 96543269 | 3.7  |
| chr8 | 96624504 | 96625271 | 3.03 |
| chr8 | 96861965 | 96863306 | 5.05 |
| chr8 | 96960132 | 96961528 | 5.05 |
| chr8 | 97037446 | 97038550 | 4.04 |
| chr8 | 97042047 | 97042953 | 3.03 |
| chr8 | 97096397 | 97097490 | 3.36 |
| chr8 | 97159325 | 97160727 | 4.71 |
| chr8 | 97225442 | 97226321 | 2.69 |
| chr8 | 97273346 | 97274667 | 4.71 |
| chr8 | 97274972 | 97275736 | 3.03 |
| chr8 | 97366025 | 97366900 | 3.03 |
| chr8 | 97409134 | 97410599 | 3.36 |
| chr8 | 97435986 | 97436752 | 3.36 |
| chr8 | 97446227 | 97447373 | 4.04 |
| chr8 | 97505365 | 97507135 | 3.36 |
| chr8 | 97573800 | 97574896 | 3.7  |
| chr8 | 97646509 | 97647519 | 3.7  |
| chr8 | 97690848 | 97693286 | 5.38 |
| chr8 | 97694534 | 97696752 | 4.71 |
| chr8 | 97701298 | 97702185 | 4.04 |
| chr8 | 97725429 | 97727246 | 4.37 |
| chr8 | 97817510 | 97818328 | 3.36 |
| chr8 | 97830718 | 97831747 | 4.37 |
| chr8 | 97956871 | 97958361 | 4.71 |
| chr8 | 98008263 | 98009077 | 3.36 |
| chr8 | 98073614 | 98074710 | 4.04 |
| chr8 | 98171744 | 98172822 | 4.04 |
| chr8 | 98177873 | 98178815 | 4.37 |
| chr8 | 98198963 | 98201666 | 5.38 |
| chr8 | 98219006 | 98220498 | 3.36 |
| chr8 | 98233893 | 98235543 | 4.37 |
| chr8 | 98251255 | 98252529 | 3.7  |
| chr8 | 98378666 | 98379596 | 3.36 |
| chr8 | 98387646 | 98388348 | 3.36 |
| chr8 | 98461790 | 98463326 | 3.03 |
| chr8 | 98472041 | 98472938 | 3.7  |
| chr8 | 98487651 | 98488541 | 3.36 |
| chr8 | 98491665 | 98493006 | 3.7  |
| chr8 | 98540857 | 98541720 | 3.7  |
| chr8 | 98553110 | 98554052 | 3.7  |

|      |          |          |       |
|------|----------|----------|-------|
| chr8 | 98565193 | 98566471 | 4.37  |
| chr8 | 98584762 | 98585805 | 3.03  |
| chr8 | 98607575 | 98608774 | 4.37  |
| chr8 | 98649567 | 98650780 | 4.71  |
| chr8 | 98656234 | 98659707 | 3.7   |
| chr8 | 98718428 | 98719258 | 1.68  |
| chr8 | 98767394 | 98768231 | 4.04  |
| chr8 | 98773394 | 98774400 | 3.7   |
| chr8 | 98784942 | 98785922 | 3.7   |
| chr8 | 98787861 | 98788732 | 3.7   |
| chr8 | 98797274 | 98798085 | 4.04  |
| chr8 | 98916466 | 98917644 | 4.37  |
| chr8 | 98945439 | 98946859 | 3.03  |
| chr8 | 98982052 | 98984520 | 4.71  |
| chr8 | 99051202 | 99052080 | 3.36  |
| chr8 | 99054109 | 99055310 | 3.7   |
| chr8 | 99057072 | 99058631 | 4.37  |
| chr8 | 99097314 | 99098823 | 4.04  |
| chr8 | 99128811 | 99130584 | 3.7   |
| chr8 | 99198906 | 99200486 | 3.03  |
| chr8 | 99206159 | 99206868 | 3.7   |
| chr8 | 99209483 | 99210939 | 5.05  |
| chr8 | 99232156 | 99233316 | 3.36  |
| chr8 | 99241247 | 99241967 | 1.68  |
| chr8 | 99257180 | 99258063 | 3.03  |
| chr8 | 99305082 | 99307498 | 4.37  |
| chr8 | 99309356 | 99310211 | 3.36  |
| chr8 | 99317493 | 99319143 | 4.04  |
| chr8 | 99328677 | 99331736 | 4.71  |
| chr8 | 99349882 | 99350631 | 4.37  |
| chr8 | 99361155 | 99363639 | 4.37  |
| chr8 | 99471156 | 99474364 | 4.04  |
| chr8 | 99506909 | 99508074 | 4.37  |
| chr8 | 99536907 | 99537817 | 4.04  |
| chr8 | 99615757 | 99617510 | 4.04  |
| chr8 | 99624772 | 99626312 | 3.36  |
| chr8 | 99682402 | 99683997 | 6.05  |
| chr8 | 99736356 | 99737288 | 3.36  |
| chr8 | 99792573 | 99800305 | 13.12 |
| chr8 | 99804321 | 99805144 | 4.37  |
| chr8 | 99805472 | 99806568 | 3.7   |
| chr8 | 99829168 | 99830373 | 4.37  |
| chr8 | 99837088 | 99839075 | 5.05  |

|      |           |           |      |
|------|-----------|-----------|------|
| chr8 | 99852778  | 99854450  | 4.71 |
| chr8 | 99913705  | 99914542  | 3.03 |
| chr8 | 99949825  | 99951676  | 4.37 |
| chr8 | 99953057  | 99954335  | 4.71 |
| chr8 | 99955948  | 99959416  | 5.38 |
| chr8 | 99971085  | 99974014  | 5.05 |
| chr8 | 99981853  | 99983313  | 4.04 |
| chr8 | 99992813  | 99996717  | 6.39 |
| chr8 | 100023555 | 100024522 | 3.03 |
| chr8 | 100024727 | 100026316 | 8.07 |
| chr8 | 100036217 | 100038582 | 6.05 |
| chr8 | 100058442 | 100060121 | 4.37 |
| chr8 | 100065371 | 100067491 | 5.38 |
| chr8 | 100068103 | 100069827 | 3.36 |
| chr8 | 100073190 | 100074272 | 3.36 |
| chr8 | 100179869 | 100181240 | 6.05 |
| chr8 | 100209382 | 100210301 | 3.36 |
| chr8 | 100279419 | 100281033 | 6.05 |
| chr8 | 100386655 | 100387579 | 3.36 |
| chr8 | 100388888 | 100390095 | 3.7  |
| chr8 | 100444134 | 100446218 | 5.38 |
| chr8 | 100472159 | 100474698 | 9.42 |
| chr8 | 100507450 | 100508588 | 6.73 |
| chr8 | 100556510 | 100557916 | 4.04 |
| chr8 | 100597043 | 100598438 | 4.04 |
| chr8 | 100609473 | 100610514 | 4.04 |
| chr8 | 100663236 | 100664170 | 2.02 |
| chr8 | 100684631 | 100689124 | 5.05 |
| chr8 | 100697287 | 100698259 | 4.37 |
| chr8 | 100698569 | 100699578 | 3.7  |
| chr8 | 100717491 | 100719748 | 5.05 |
| chr8 | 100720127 | 100722825 | 4.04 |
| chr8 | 100731001 | 100732167 | 5.05 |
| chr8 | 100758950 | 100759897 | 3.7  |
| chr8 | 100768136 | 100769581 | 4.37 |
| chr8 | 100811226 | 100812694 | 4.37 |
| chr8 | 100829992 | 100832909 | 4.04 |
| chr8 | 100892919 | 100894649 | 3.7  |
| chr8 | 100895779 | 100896781 | 4.04 |
| chr8 | 100897143 | 100898120 | 4.04 |
| chr8 | 100905109 | 100907046 | 5.72 |
| chr8 | 100908186 | 100909178 | 3.36 |
| chr8 | 100912207 | 100913084 | 4.37 |



|      |           |           |      |
|------|-----------|-----------|------|
| chr8 | 100915496 | 100916377 | 3.36 |
| chr8 | 100916645 | 100919171 | 5.05 |
| chr8 | 100930761 | 100934760 | 4.71 |
| chr8 | 100949503 | 100950970 | 3.36 |
| chr8 | 100951537 | 100952824 | 3.7  |
| chr8 | 100966268 | 100972453 | 5.05 |
| chr8 | 100993147 | 100994077 | 3.7  |
| chr8 | 100994409 | 100995583 | 4.04 |
| chr8 | 101008591 | 101010825 | 3.7  |
| chr8 | 101023247 | 101024499 | 4.37 |
| chr8 | 101025317 | 101028533 | 3.7  |
| chr8 | 101031064 | 101032048 | 4.04 |
| chr8 | 101036476 | 101037663 | 3.7  |
| chr8 | 101040820 | 101041777 | 3.03 |
| chr8 | 101071524 | 101072335 | 3.7  |
| chr8 | 101078580 | 101079550 | 3.36 |
| chr8 | 101087869 | 101089088 | 3.7  |
| chr8 | 101096353 | 101097543 | 4.04 |
| chr8 | 101118401 | 101120537 | 4.04 |
| chr8 | 101135234 | 101136513 | 5.05 |
| chr8 | 101157527 | 101158772 | 4.37 |
| chr8 | 101166811 | 101167728 | 1.35 |
| chr8 | 101170108 | 101170977 | 5.38 |
| chr8 | 101224426 | 101226365 | 5.38 |
| chr8 | 101314768 | 101315630 | 4.37 |
| chr8 | 101320657 | 101323444 | 6.05 |
| chr8 | 101356772 | 101357721 | 3.36 |
| chr8 | 101357996 | 101359066 | 3.7  |
| chr8 | 101394672 | 101396476 | 4.04 |
| chr8 | 101403881 | 101404599 | 3.36 |
| chr8 | 101407343 | 101409174 | 4.04 |
| chr8 | 101422626 | 101424071 | 3.36 |
| chr8 | 101426090 | 101426989 | 4.04 |
| chr8 | 101427296 | 101432516 | 5.38 |
| chr8 | 101442789 | 101444086 | 3.7  |
| chr8 | 101444998 | 101446442 | 3.7  |
| chr8 | 101473749 | 101475674 | 3.7  |
| chr8 | 101479920 | 101480776 | 3.36 |
| chr8 | 101482953 | 101485330 | 5.05 |
| chr8 | 101491767 | 101495970 | 7.4  |
| chr8 | 101498069 | 101498937 | 4.04 |
| chr8 | 101499422 | 101500874 | 6.73 |
| chr8 | 101503872 | 101504716 | 5.05 |

|      |           |           |      |
|------|-----------|-----------|------|
| chr8 | 101511924 | 101513135 | 4.37 |
| chr8 | 101518108 | 101519233 | 4.37 |
| chr8 | 101521353 | 101522331 | 3.03 |
| chr8 | 101555163 | 101556593 | 3.7  |
| chr8 | 101564456 | 101565920 | 4.04 |
| chr8 | 101571282 | 101572754 | 5.38 |
| chr8 | 101591992 | 101593556 | 4.71 |
| chr8 | 101598963 | 101601404 | 4.71 |
| chr8 | 101601628 | 101602936 | 4.04 |
| chr8 | 101607528 | 101609036 | 3.36 |
| chr8 | 101613486 | 101614298 | 3.36 |
| chr8 | 101620295 | 101621731 | 3.7  |
| chr8 | 101635177 | 101636648 | 3.7  |
| chr8 | 101654226 | 101655161 | 4.37 |
| chr8 | 101661493 | 101662523 | 3.36 |
| chr8 | 101675421 | 101676681 | 4.71 |
| chr8 | 101681714 | 101684786 | 4.04 |
| chr8 | 101692658 | 101694175 | 5.05 |
| chr8 | 101697670 | 101698426 | 4.04 |
| chr8 | 101716134 | 101718318 | 4.71 |
| chr8 | 101731978 | 101735791 | 5.38 |
| chr8 | 101736128 | 101738070 | 4.37 |
| chr8 | 101748892 | 101749668 | 3.36 |
| chr8 | 101755061 | 101756233 | 3.7  |
| chr8 | 101757367 | 101761231 | 8.41 |
| chr8 | 101783094 | 101785108 | 4.71 |
| chr8 | 101798107 | 101799390 | 3.36 |
| chr8 | 101803398 | 101804302 | 3.03 |
| chr8 | 101805554 | 101806625 | 3.7  |
| chr8 | 101813584 | 101814553 | 2.69 |
| chr8 | 101831267 | 101833799 | 5.38 |
| chr8 | 101836720 | 101837956 | 3.7  |
| chr8 | 101838919 | 101840138 | 4.04 |
| chr8 | 101844335 | 101846523 | 3.36 |
| chr8 | 101850538 | 101851410 | 3.03 |
| chr8 | 101859200 | 101860423 | 3.7  |
| chr8 | 101863362 | 101864525 | 4.04 |
| chr8 | 101871720 | 101873703 | 4.71 |
| chr8 | 101878371 | 101879834 | 4.37 |
| chr8 | 101889690 | 101890454 | 3.03 |
| chr8 | 101892011 | 101896259 | 6.39 |
| chr8 | 101908327 | 101909177 | 3.7  |
| chr8 | 101912131 | 101913531 | 5.38 |

|      |           |           |      |
|------|-----------|-----------|------|
| chr8 | 101920316 | 101921321 | 3.03 |
| chr8 | 101929787 | 101930517 | 2.35 |
| chr8 | 101933480 | 101934415 | 3.7  |
| chr8 | 101944534 | 101945875 | 4.71 |
| chr8 | 101954253 | 101955607 | 4.37 |
| chr8 | 101961417 | 101967391 | 5.05 |
| chr8 | 101979273 | 101980264 | 3.7  |
| chr8 | 101981308 | 101982101 | 4.04 |
| chr8 | 101990557 | 101991433 | 4.04 |
| chr8 | 101998618 | 102000701 | 4.04 |
| chr8 | 102005901 | 102007523 | 4.37 |
| chr8 | 102009905 | 102010740 | 3.03 |
| chr8 | 102020180 | 102021004 | 3.7  |
| chr8 | 102022267 | 102023580 | 3.36 |
| chr8 | 102034334 | 102035147 | 4.71 |
| chr8 | 102039512 | 102040774 | 4.37 |
| chr8 | 102043368 | 102045698 | 4.71 |
| chr8 | 102047875 | 102049277 | 3.7  |
| chr8 | 102051804 | 102052936 | 3.03 |
| chr8 | 102053627 | 102054562 | 3.7  |
| chr8 | 102056278 | 102057191 | 3.7  |
| chr8 | 102060563 | 102061528 | 3.7  |
| chr8 | 102062909 | 102065027 | 4.71 |
| chr8 | 102066229 | 102067424 | 4.04 |
| chr8 | 102074603 | 102077492 | 3.7  |
| chr8 | 102081949 | 102082633 | 3.03 |
| chr8 | 102082995 | 102085038 | 4.04 |
| chr8 | 102090133 | 102091212 | 4.71 |
| chr8 | 102092235 | 102094582 | 4.37 |
| chr8 | 102100599 | 102101960 | 4.37 |
| chr8 | 102105260 | 102106321 | 5.72 |
| chr8 | 102107243 | 102108744 | 4.71 |
| chr8 | 102110746 | 102112364 | 4.37 |
| chr8 | 102112814 | 102113729 | 3.03 |
| chr8 | 102120337 | 102121714 | 4.37 |
| chr8 | 102127573 | 102128393 | 2.69 |
| chr8 | 102129272 | 102130113 | 4.04 |
| chr8 | 102137170 | 102140094 | 4.71 |
| chr8 | 102148957 | 102151070 | 4.04 |
| chr8 | 102164743 | 102168323 | 4.71 |
| chr8 | 102169543 | 102172139 | 5.38 |
| chr8 | 102175503 | 102176936 | 3.36 |
| chr8 | 102178987 | 102180112 | 3.36 |

|      |           |           |      |
|------|-----------|-----------|------|
| chr8 | 102181247 | 102182251 | 2.35 |
| chr8 | 102187668 | 102189257 | 4.04 |
| chr8 | 102209366 | 102210529 | 4.37 |
| chr8 | 102216085 | 102219189 | 7.06 |
| chr8 | 102220040 | 102222115 | 7.4  |
| chr8 | 102223291 | 102224714 | 4.04 |
| chr8 | 102225664 | 102229563 | 4.04 |
| chr8 | 102230776 | 102235950 | 4.37 |
| chr8 | 102245562 | 102246812 | 3.7  |
| chr8 | 102250124 | 102252937 | 4.71 |
| chr8 | 102256284 | 102257717 | 3.7  |
| chr8 | 102258813 | 102259661 | 3.7  |
| chr8 | 102286273 | 102287011 | 3.7  |
| chr8 | 102295024 | 102296205 | 4.04 |
| chr8 | 102299450 | 102300836 | 4.04 |
| chr8 | 102301609 | 102302490 | 3.36 |
| chr8 | 102312952 | 102315327 | 4.37 |
| chr8 | 102329349 | 102330826 | 3.7  |
| chr8 | 102335379 | 102336955 | 3.7  |
| chr8 | 102340994 | 102342090 | 3.03 |
| chr8 | 102344667 | 102346324 | 6.05 |
| chr8 | 102349301 | 102350493 | 4.71 |
| chr8 | 102353716 | 102355967 | 4.71 |
| chr8 | 102357986 | 102360777 | 4.37 |
| chr8 | 102361443 | 102362514 | 3.36 |
| chr8 | 102366970 | 102367886 | 4.04 |
| chr8 | 102369234 | 102371832 | 4.71 |
| chr8 | 102372437 | 102374533 | 4.04 |
| chr8 | 102374818 | 102377708 | 5.05 |
| chr8 | 102377987 | 102381813 | 7.74 |
| chr8 | 102382244 | 102385842 | 4.37 |
| chr8 | 102387025 | 102390562 | 6.05 |
| chr8 | 102391178 | 102392327 | 3.7  |
| chr8 | 102392871 | 102404290 | 5.72 |
| chr8 | 102405290 | 102408158 | 4.04 |
| chr8 | 102410409 | 102411958 | 3.7  |
| chr8 | 102415677 | 102420678 | 4.37 |
| chr8 | 102421281 | 102422874 | 4.04 |
| chr8 | 102431426 | 102432561 | 4.04 |
| chr8 | 102433061 | 102434021 | 3.36 |
| chr8 | 102436171 | 102437778 | 4.37 |
| chr8 | 102444012 | 102445942 | 4.71 |
| chr8 | 102446878 | 102448190 | 4.37 |

|      |           |           |      |
|------|-----------|-----------|------|
| chr8 | 102448769 | 102453406 | 8.07 |
| chr8 | 102459624 | 102467192 | 6.39 |
| chr8 | 102469484 | 102471097 | 4.04 |
| chr8 | 102471471 | 102474273 | 4.37 |
| chr8 | 102474821 | 102480648 | 7.06 |
| chr8 | 102480949 | 102482942 | 3.7  |
| chr8 | 102485192 | 102491106 | 6.39 |
| chr8 | 102491385 | 102494700 | 5.72 |
| chr8 | 102496096 | 102497639 | 4.37 |
| chr8 | 102498023 | 102499204 | 4.04 |
| chr8 | 102499450 | 102500374 | 4.71 |
| chr8 | 102500721 | 102501908 | 3.7  |
| chr8 | 102503383 | 102507854 | 5.05 |
| chr8 | 102512942 | 102519490 | 6.73 |
| chr8 | 102523444 | 102525807 | 5.38 |
| chr8 | 102527077 | 102528611 | 6.05 |
| chr8 | 102531789 | 102533061 | 4.04 |
| chr8 | 102536147 | 102536963 | 3.7  |
| chr8 | 102539169 | 102541373 | 5.72 |
| chr8 | 102542037 | 102543319 | 4.37 |
| chr8 | 102543729 | 102545083 | 4.71 |
| chr8 | 102545875 | 102546780 | 3.36 |
| chr8 | 102548766 | 102550061 | 4.04 |
| chr8 | 102560292 | 102561269 | 3.7  |
| chr8 | 102580388 | 102582089 | 4.04 |
| chr8 | 102582453 | 102583634 | 5.72 |
| chr8 | 102584734 | 102585866 | 3.03 |
| chr8 | 102615222 | 102616739 | 7.4  |
| chr8 | 102618543 | 102621951 | 7.06 |
| chr8 | 102628769 | 102629489 | 2.35 |
| chr8 | 102642637 | 102643509 | 4.04 |
| chr8 | 102647573 | 102648935 | 5.38 |
| chr8 | 102649316 | 102651797 | 4.04 |
| chr8 | 102666187 | 102667410 | 4.37 |
| chr8 | 102680108 | 102684550 | 5.72 |
| chr8 | 102689179 | 102690438 | 4.04 |
| chr8 | 102702711 | 102703978 | 3.7  |
| chr8 | 102712889 | 102714235 | 4.37 |
| chr8 | 102714856 | 102716298 | 4.37 |
| chr8 | 102718325 | 102721649 | 4.04 |
| chr8 | 102729240 | 102731493 | 3.36 |
| chr8 | 102738557 | 102740283 | 4.71 |
| chr8 | 102746968 | 102747874 | 3.36 |

|      |           |           |      |
|------|-----------|-----------|------|
| chr8 | 102761532 | 102763190 | 3.7  |
| chr8 | 102763396 | 102764334 | 3.7  |
| chr8 | 102764746 | 102765921 | 3.36 |
| chr8 | 102766497 | 102770042 | 5.05 |
| chr8 | 102776321 | 102777260 | 3.36 |
| chr8 | 102779065 | 102780353 | 4.71 |
| chr8 | 102787345 | 102789504 | 3.7  |
| chr8 | 102795664 | 102796524 | 3.36 |
| chr8 | 102798429 | 102799837 | 3.7  |
| chr8 | 102803947 | 102805097 | 3.7  |
| chr8 | 102818066 | 102821240 | 4.71 |
| chr8 | 102826171 | 102827413 | 4.04 |
| chr8 | 102834885 | 102836446 | 4.04 |
| chr8 | 102839124 | 102839942 | 3.7  |
| chr8 | 102848024 | 102849560 | 4.37 |
| chr8 | 102853323 | 102855543 | 4.04 |
| chr8 | 102856870 | 102858114 | 3.7  |
| chr8 | 102861702 | 102862570 | 4.04 |
| chr8 | 102873311 | 102874658 | 4.71 |
| chr8 | 102889077 | 102891717 | 3.7  |
| chr8 | 102895193 | 102897523 | 4.37 |
| chr8 | 102924752 | 102925858 | 3.7  |
| chr8 | 102926085 | 102926811 | 4.04 |
| chr8 | 102928309 | 102929501 | 3.36 |
| chr8 | 102934854 | 102935678 | 3.7  |
| chr8 | 102942244 | 102943261 | 4.04 |
| chr8 | 102959660 | 102961048 | 4.04 |
| chr8 | 102964012 | 102965329 | 4.04 |
| chr8 | 102976037 | 102977353 | 5.05 |
| chr8 | 102992201 | 102993736 | 4.04 |
| chr8 | 102996392 | 102997450 | 4.37 |
| chr8 | 103001535 | 103002728 | 3.7  |
| chr8 | 103019188 | 103021211 | 4.37 |
| chr8 | 103021489 | 103022958 | 3.03 |
| chr8 | 103024041 | 103029796 | 5.38 |
| chr8 | 103036139 | 103037478 | 4.71 |
| chr8 | 103040029 | 103040825 | 3.7  |
| chr8 | 103041049 | 103042530 | 4.37 |
| chr8 | 103045678 | 103047242 | 4.04 |
| chr8 | 103079526 | 103080428 | 3.36 |
| chr8 | 103091573 | 103092901 | 3.7  |
| chr8 | 103095917 | 103096791 | 4.04 |
| chr8 | 103097355 | 103098780 | 4.04 |

|      |           |           |       |
|------|-----------|-----------|-------|
| chr8 | 103099851 | 103101258 | 3.03  |
| chr8 | 103101555 | 103104426 | 11.77 |
| chr8 | 103105331 | 103107742 | 4.71  |
| chr8 | 103108074 | 103109255 | 4.37  |
| chr8 | 103132747 | 103134199 | 3.7   |
| chr8 | 103151373 | 103153636 | 5.38  |
| chr8 | 103154271 | 103157096 | 4.04  |
| chr8 | 103191461 | 103192622 | 3.7   |
| chr8 | 103192976 | 103193981 | 3.36  |
| chr8 | 103198247 | 103199423 | 4.04  |
| chr8 | 103201516 | 103204786 | 3.7   |
| chr8 | 103207065 | 103208012 | 3.36  |
| chr8 | 103208511 | 103209341 | 3.03  |
| chr8 | 103242949 | 103245655 | 4.71  |
| chr8 | 103249147 | 103252822 | 4.71  |
| chr8 | 103292359 | 103293689 | 3.36  |
| chr8 | 103314706 | 103315544 | 3.03  |
| chr8 | 103352081 | 103353320 | 3.36  |
| chr8 | 103364779 | 103365868 | 4.37  |
| chr8 | 103422677 | 103426062 | 4.71  |
| chr8 | 103455929 | 103457127 | 4.04  |
| chr8 | 103475352 | 103476404 | 3.7   |
| chr8 | 103483589 | 103484612 | 3.7   |
| chr8 | 103498228 | 103498996 | 3.36  |
| chr8 | 103509385 | 103511140 | 3.7   |
| chr8 | 103535050 | 103536681 | 4.37  |
| chr8 | 103537509 | 103538641 | 4.04  |
| chr8 | 103562864 | 103564044 | 3.03  |
| chr8 | 103565828 | 103566732 | 3.7   |
| chr8 | 103588131 | 103589512 | 4.04  |
| chr8 | 103597010 | 103598145 | 5.72  |
| chr8 | 103611851 | 103614073 | 5.38  |
| chr8 | 103614872 | 103616602 | 4.04  |
| chr8 | 103628319 | 103630609 | 4.37  |
| chr8 | 103649540 | 103651103 | 3.7   |
| chr8 | 103652962 | 103654313 | 6.39  |
| chr8 | 103658615 | 103660477 | 5.05  |
| chr8 | 103665402 | 103666210 | 3.36  |
| chr8 | 103666639 | 103669721 | 4.37  |
| chr8 | 103674066 | 103674934 | 4.04  |
| chr8 | 103686521 | 103687485 | 3.7   |
| chr8 | 103688091 | 103690336 | 6.05  |
| chr8 | 103692401 | 103693344 | 4.37  |

|      |           |           |      |
|------|-----------|-----------|------|
| chr8 | 103704756 | 103705604 | 4.04 |
| chr8 | 103713595 | 103715445 | 4.37 |
| chr8 | 103725761 | 103726574 | 3.7  |
| chr8 | 103731267 | 103732227 | 4.04 |
| chr8 | 103733138 | 103734586 | 3.7  |
| chr8 | 103734812 | 103736866 | 5.72 |
| chr8 | 103743024 | 103744571 | 4.37 |
| chr8 | 103745404 | 103751289 | 4.71 |
| chr8 | 103752221 | 103753731 | 3.7  |
| chr8 | 103760991 | 103762284 | 4.04 |
| chr8 | 103762860 | 103765774 | 4.37 |
| chr8 | 103767814 | 103769746 | 5.38 |
| chr8 | 103770825 | 103771687 | 3.03 |
| chr8 | 103779693 | 103781004 | 5.05 |
| chr8 | 103794499 | 103795360 | 3.7  |
| chr8 | 103796691 | 103797703 | 3.03 |
| chr8 | 103800207 | 103801191 | 4.71 |
| chr8 | 103818165 | 103823985 | 6.39 |
| chr8 | 103840514 | 103841475 | 3.36 |
| chr8 | 103841906 | 103842606 | 2.35 |
| chr8 | 103855352 | 103856265 | 3.36 |
| chr8 | 103864927 | 103865938 | 3.36 |
| chr8 | 103874300 | 103878226 | 6.39 |
| chr8 | 103883658 | 103884672 | 4.37 |
| chr8 | 103915553 | 103916527 | 3.36 |
| chr8 | 103922302 | 103923310 | 3.7  |
| chr8 | 103937272 | 103938256 | 3.36 |
| chr8 | 103947622 | 103948769 | 4.04 |
| chr8 | 103964993 | 103965837 | 3.7  |
| chr8 | 103979488 | 103980312 | 2.35 |
| chr8 | 103981789 | 103982608 | 2.02 |
| chr8 | 103985150 | 103986104 | 3.03 |
| chr8 | 104019755 | 104020602 | 4.04 |
| chr8 | 104032514 | 104033824 | 3.36 |
| chr8 | 104087528 | 104088832 | 4.71 |
| chr8 | 104125689 | 104127117 | 3.03 |
| chr8 | 104134085 | 104134842 | 2.02 |
| chr8 | 104141813 | 104142886 | 3.7  |
| chr8 | 104143182 | 104144033 | 4.71 |
| chr8 | 104147147 | 104148175 | 3.36 |
| chr8 | 104149831 | 104150902 | 3.7  |
| chr8 | 104174310 | 104175499 | 6.73 |
| chr8 | 104186344 | 104187639 | 4.37 |



|      |           |           |      |
|------|-----------|-----------|------|
| chr8 | 104214956 | 104215913 | 3.36 |
| chr8 | 104219786 | 104221119 | 4.37 |
| chr8 | 104221797 | 104223015 | 3.7  |
| chr8 | 104225447 | 104227061 | 4.04 |
| chr8 | 104238978 | 104240623 | 3.36 |
| chr8 | 104242807 | 104244332 | 5.05 |
| chr8 | 104267417 | 104269539 | 4.04 |
| chr8 | 104270162 | 104272899 | 4.04 |
| chr8 | 104273359 | 104274779 | 4.71 |
| chr8 | 104276224 | 104277158 | 4.04 |
| chr8 | 104281550 | 104284672 | 9.75 |
| chr8 | 104285438 | 104287639 | 4.04 |
| chr8 | 104288046 | 104289501 | 3.03 |
| chr8 | 104305370 | 104306325 | 3.36 |
| chr8 | 104310440 | 104313525 | 5.38 |
| chr8 | 104315833 | 104316735 | 2.69 |
| chr8 | 104328544 | 104329684 | 3.7  |
| chr8 | 104383310 | 104384177 | 3.36 |
| chr8 | 104385121 | 104387012 | 4.71 |
| chr8 | 104404203 | 104405032 | 4.37 |
| chr8 | 104426475 | 104429093 | 5.72 |
| chr8 | 104434500 | 104435260 | 3.7  |
| chr8 | 104510588 | 104512376 | 3.7  |
| chr8 | 104513371 | 104514561 | 4.37 |
| chr8 | 104545256 | 104547324 | 5.05 |
| chr8 | 104556924 | 104558258 | 4.71 |
| chr8 | 104574847 | 104576758 | 4.37 |
| chr8 | 104577761 | 104578568 | 4.37 |
| chr8 | 104586346 | 104587716 | 3.7  |
| chr8 | 104587929 | 104589200 | 4.37 |
| chr8 | 104599559 | 104600393 | 4.04 |
| chr8 | 104606607 | 104607792 | 3.7  |
| chr8 | 104627973 | 104629019 | 3.36 |
| chr8 | 104630161 | 104631475 | 4.04 |
| chr8 | 104638061 | 104639900 | 5.72 |
| chr8 | 104641991 | 104643052 | 3.03 |
| chr8 | 104646561 | 104648175 | 3.36 |
| chr8 | 104654714 | 104656032 | 3.7  |
| chr8 | 104660528 | 104662488 | 7.4  |
| chr8 | 104704288 | 104705938 | 3.36 |
| chr8 | 104716245 | 104717179 | 2.69 |
| chr8 | 104719077 | 104720711 | 3.7  |
| chr8 | 104770024 | 104770952 | 3.36 |

|      |           |           |      |
|------|-----------|-----------|------|
| chr8 | 104792633 | 104793504 | 4.37 |
| chr8 | 104807809 | 104808624 | 3.36 |
| chr8 | 104819288 | 104820085 | 2.02 |
| chr8 | 104910078 | 104910867 | 3.7  |
| chr8 | 104991560 | 104993400 | 3.7  |
| chr8 | 105014347 | 105015154 | 2.02 |
| chr8 | 105019368 | 105020417 | 3.36 |
| chr8 | 105136307 | 105137248 | 3.03 |
| chr8 | 105253193 | 105254111 | 3.36 |
| chr8 | 105258521 | 105260661 | 5.05 |
| chr8 | 105280015 | 105280672 | 2.69 |
| chr8 | 105287072 | 105288627 | 4.37 |
| chr8 | 105290003 | 105291609 | 3.7  |
| chr8 | 105293462 | 105295108 | 3.7  |
| chr8 | 105306145 | 105307128 | 4.04 |
| chr8 | 105309718 | 105310876 | 3.36 |
| chr8 | 105317277 | 105318258 | 3.7  |
| chr8 | 105319117 | 105320166 | 3.36 |
| chr8 | 105327500 | 105328687 | 5.05 |
| chr8 | 105343067 | 105343928 | 3.36 |
| chr8 | 105348056 | 105349483 | 3.7  |
| chr8 | 105362019 | 105363044 | 3.36 |
| chr8 | 105365504 | 105366474 | 3.03 |
| chr8 | 105389576 | 105390906 | 4.71 |
| chr8 | 105406542 | 105408259 | 3.7  |
| chr8 | 105410179 | 105411153 | 3.03 |
| chr8 | 105412000 | 105413034 | 2.69 |
| chr8 | 105429180 | 105430626 | 3.7  |
| chr8 | 105442818 | 105443676 | 3.7  |
| chr8 | 105446166 | 105446956 | 2.35 |
| chr8 | 105462922 | 105463955 | 4.71 |
| chr8 | 105481891 | 105483204 | 4.71 |
| chr8 | 105496273 | 105497134 | 3.36 |
| chr8 | 105514007 | 105514887 | 4.04 |
| chr8 | 105525476 | 105526332 | 3.36 |
| chr8 | 105541539 | 105542938 | 4.71 |
| chr8 | 105565246 | 105566242 | 3.03 |
| chr8 | 105573627 | 105575068 | 3.7  |
| chr8 | 105600328 | 105602356 | 6.05 |
| chr8 | 105603405 | 105605008 | 3.7  |
| chr8 | 105605377 | 105606196 | 4.04 |
| chr8 | 105607393 | 105608387 | 3.03 |
| chr8 | 105617332 | 105618386 | 3.7  |

|      |           |           |       |
|------|-----------|-----------|-------|
| chr8 | 105620335 | 105622936 | 5.38  |
| chr8 | 105623507 | 105629872 | 10.43 |
| chr8 | 105632846 | 105633821 | 3.36  |
| chr8 | 105646154 | 105648169 | 4.37  |
| chr8 | 105688191 | 105688937 | 3.36  |
| chr8 | 105782269 | 105783662 | 5.05  |
| chr8 | 105784379 | 105785264 | 2.02  |
| chr8 | 105787403 | 105788895 | 3.03  |
| chr8 | 105804110 | 105804922 | 2.02  |
| chr8 | 105812337 | 105813343 | 2.02  |
| chr8 | 105822004 | 105823000 | 2.35  |
| chr8 | 105835864 | 105836893 | 4.37  |
| chr8 | 105860203 | 105861347 | 4.37  |
| chr8 | 105900592 | 105901676 | 3.36  |
| chr8 | 105930330 | 105931231 | 3.7   |
| chr8 | 105934158 | 105935180 | 4.04  |
| chr8 | 105977443 | 105978534 | 3.7   |
| chr8 | 105988693 | 105990677 | 4.04  |
| chr8 | 106001317 | 106002243 | 3.36  |
| chr8 | 106008758 | 106010497 | 3.7   |
| chr8 | 106115991 | 106117097 | 3.36  |
| chr8 | 106124091 | 106124914 | 3.36  |
| chr8 | 106125490 | 106126480 | 3.7   |
| chr8 | 106153552 | 106154878 | 4.04  |
| chr8 | 106165395 | 106166478 | 4.37  |
| chr8 | 106171648 | 106172859 | 4.71  |
| chr8 | 106183461 | 106185538 | 3.7   |
| chr8 | 106186980 | 106187827 | 3.7   |
| chr8 | 106197026 | 106200816 | 5.38  |
| chr8 | 106204386 | 106205506 | 3.36  |
| chr8 | 106208208 | 106209371 | 4.37  |
| chr8 | 106216473 | 106217824 | 5.38  |
| chr8 | 106238489 | 106239631 | 4.04  |
| chr8 | 106316780 | 106317728 | 4.37  |
| chr8 | 106328565 | 106329990 | 3.36  |
| chr8 | 106330705 | 106331806 | 3.7   |
| chr8 | 106387775 | 106389310 | 4.04  |
| chr8 | 106400291 | 106401635 | 4.37  |
| chr8 | 106410394 | 106411329 | 3.36  |
| chr8 | 106432421 | 106433229 | 3.03  |
| chr8 | 106635443 | 106636604 | 3.7   |
| chr8 | 106690897 | 106692399 | 2.69  |
| chr8 | 106698412 | 106699542 | 3.7   |

|      |           |           |      |
|------|-----------|-----------|------|
| chr8 | 106728436 | 106729924 | 2.35 |
| chr8 | 106739674 | 106740533 | 3.7  |
| chr8 | 106752835 | 106754184 | 3.36 |
| chr8 | 106766508 | 106767331 | 3.36 |
| chr8 | 106773024 | 106773751 | 3.36 |
| chr8 | 106798802 | 106800357 | 3.7  |
| chr8 | 106817980 | 106818733 | 4.04 |
| chr8 | 106851176 | 106852005 | 4.37 |
| chr8 | 106899343 | 106900338 | 3.7  |
| chr8 | 106928401 | 106929451 | 4.37 |
| chr8 | 106930023 | 106931284 | 4.37 |
| chr8 | 107057223 | 107058369 | 3.36 |
| chr8 | 107072682 | 107074216 | 3.36 |
| chr8 | 107088214 | 107089333 | 3.7  |
| chr8 | 107117533 | 107118461 | 3.03 |
| chr8 | 107120347 | 107122104 | 8.41 |
| chr8 | 107200151 | 107201199 | 3.03 |
| chr8 | 107255127 | 107256308 | 3.7  |
| chr8 | 107267656 | 107271550 | 8.07 |
| chr8 | 107291636 | 107292394 | 3.36 |
| chr8 | 107394046 | 107395161 | 2.35 |
| chr8 | 107570593 | 107571517 | 3.7  |
| chr8 | 107616575 | 107617841 | 3.7  |
| chr8 | 107620041 | 107621128 | 4.04 |
| chr8 | 107630531 | 107631518 | 3.7  |
| chr8 | 107645239 | 107646491 | 4.37 |
| chr8 | 107648158 | 107648921 | 4.71 |
| chr8 | 107669069 | 107671334 | 4.04 |
| chr8 | 107682163 | 107683604 | 4.04 |
| chr8 | 107685239 | 107689030 | 9.08 |
| chr8 | 107778102 | 107779193 | 4.71 |
| chr8 | 107790086 | 107791708 | 3.7  |
| chr8 | 107806263 | 107807401 | 3.7  |
| chr8 | 107813896 | 107814990 | 2.35 |
| chr8 | 107836289 | 107837183 | 3.7  |
| chr8 | 107867752 | 107869206 | 4.71 |
| chr8 | 107946190 | 107948996 | 3.7  |
| chr8 | 107950396 | 107951274 | 3.7  |
| chr8 | 107961781 | 107963488 | 5.38 |
| chr8 | 107997373 | 107998182 | 2.69 |
| chr8 | 108006970 | 108008166 | 3.7  |
| chr8 | 108028452 | 108029286 | 4.37 |
| chr8 | 108041701 | 108043371 | 5.72 |

|      |           |           |      |
|------|-----------|-----------|------|
| chr8 | 108080846 | 108081703 | 4.37 |
| chr8 | 108082590 | 108083818 | 4.37 |
| chr8 | 108090362 | 108092027 | 6.39 |
| chr8 | 108162373 | 108163900 | 3.36 |
| chr8 | 108179131 | 108180510 | 4.04 |
| chr8 | 108182658 | 108183520 | 4.04 |
| chr8 | 108199449 | 108200366 | 3.7  |
| chr8 | 108278264 | 108279089 | 3.7  |
| chr8 | 108355709 | 108356824 | 3.36 |
| chr8 | 108428386 | 108429252 | 2.02 |
| chr8 | 108493888 | 108494722 | 3.03 |
| chr8 | 108568498 | 108569686 | 3.03 |
| chr8 | 108645478 | 108646971 | 3.7  |
| chr8 | 108666753 | 108667652 | 3.36 |
| chr8 | 108679873 | 108681075 | 4.04 |
| chr8 | 108684689 | 108685497 | 1.68 |
| chr8 | 108691800 | 108692610 | 3.7  |
| chr8 | 108735020 | 108736186 | 4.04 |
| chr8 | 108742669 | 108743684 | 3.36 |
| chr8 | 108810879 | 108812015 | 3.7  |
| chr8 | 108898109 | 108899162 | 4.37 |
| chr8 | 108926930 | 108928947 | 5.05 |
| chr8 | 108929789 | 108931165 | 6.05 |
| chr8 | 108940050 | 108940858 | 3.36 |
| chr8 | 108963288 | 108964512 | 4.71 |
| chr8 | 109031639 | 109032855 | 3.36 |
| chr8 | 109044001 | 109044798 | 2.35 |
| chr8 | 109069247 | 109070173 | 4.04 |
| chr8 | 109131650 | 109133386 | 3.7  |
| chr8 | 109148346 | 109149875 | 3.36 |
| chr8 | 109172352 | 109173329 | 3.03 |
| chr8 | 109185587 | 109187178 | 3.36 |
| chr8 | 109205682 | 109206558 | 4.04 |
| chr8 | 109218681 | 109219630 | 4.04 |
| chr8 | 109250533 | 109251854 | 4.04 |
| chr8 | 109254747 | 109255625 | 3.7  |
| chr8 | 109259988 | 109261799 | 7.06 |
| chr8 | 109271938 | 109273210 | 4.04 |
| chr8 | 109274513 | 109275390 | 4.71 |
| chr8 | 109298988 | 109299913 | 4.71 |
| chr8 | 109331937 | 109332842 | 3.7  |
| chr8 | 109335831 | 109336638 | 4.04 |
| chr8 | 109350931 | 109351954 | 3.7  |

|      |           |           |      |
|------|-----------|-----------|------|
| chr8 | 109359884 | 109360586 | 4.04 |
| chr8 | 109370210 | 109376226 | 5.05 |
| chr8 | 109382972 | 109383842 | 3.7  |
| chr8 | 109415916 | 109417218 | 4.37 |
| chr8 | 109428228 | 109429195 | 3.36 |
| chr8 | 109429774 | 109430654 | 4.04 |
| chr8 | 109442106 | 109443419 | 4.37 |
| chr8 | 109449226 | 109450300 | 3.36 |
| chr8 | 109452842 | 109454195 | 3.7  |
| chr8 | 109521439 | 109522428 | 3.7  |
| chr8 | 109550757 | 109551984 | 3.36 |
| chr8 | 109577543 | 109579275 | 4.71 |
| chr8 | 109586006 | 109589008 | 3.7  |
| chr8 | 109594801 | 109595699 | 3.36 |
| chr8 | 109596198 | 109599297 | 5.72 |
| chr8 | 109601121 | 109602034 | 3.36 |
| chr8 | 109611214 | 109614951 | 4.71 |
| chr8 | 109618332 | 109619761 | 4.71 |
| chr8 | 109620336 | 109621675 | 4.37 |
| chr8 | 109622170 | 109623025 | 3.36 |
| chr8 | 109623605 | 109625773 | 4.04 |
| chr8 | 109631953 | 109633657 | 4.04 |
| chr8 | 109638976 | 109640520 | 3.7  |
| chr8 | 109647053 | 109648521 | 4.04 |
| chr8 | 109648781 | 109650262 | 4.04 |
| chr8 | 109667402 | 109669988 | 4.04 |
| chr8 | 109671639 | 109672907 | 6.05 |
| chr8 | 109674007 | 109675062 | 4.04 |
| chr8 | 109676476 | 109677886 | 3.7  |
| chr8 | 109678689 | 109681762 | 5.05 |
| chr8 | 109683936 | 109686191 | 4.04 |
| chr8 | 109707970 | 109708972 | 4.37 |
| chr8 | 109711828 | 109712790 | 3.03 |
| chr8 | 109719548 | 109720375 | 3.36 |
| chr8 | 109722056 | 109722931 | 3.03 |
| chr8 | 109789089 | 109791307 | 4.04 |
| chr8 | 109833222 | 109835212 | 5.05 |
| chr8 | 109850513 | 109851591 | 4.04 |
| chr8 | 109866138 | 109866965 | 3.03 |
| chr8 | 109899730 | 109900584 | 3.36 |
| chr8 | 109902377 | 109903439 | 4.37 |
| chr8 | 109927474 | 109928380 | 2.35 |
| chr8 | 109934879 | 109935718 | 3.36 |

|      |           |           |      |
|------|-----------|-----------|------|
| chr8 | 109941613 | 109942478 | 4.04 |
| chr8 | 109953953 | 109958697 | 9.42 |
| chr8 | 110027356 | 110028917 | 3.7  |
| chr8 | 110045280 | 110046252 | 3.36 |
| chr8 | 110177906 | 110179065 | 3.03 |
| chr8 | 110180420 | 110181264 | 3.7  |
| chr8 | 110213846 | 110214732 | 2.69 |
| chr8 | 110221827 | 110224266 | 5.05 |
| chr8 | 110230918 | 110236952 | 6.39 |
| chr8 | 110237473 | 110239907 | 3.36 |
| chr8 | 110240970 | 110242119 | 4.37 |
| chr8 | 110243092 | 110244025 | 3.36 |
| chr8 | 110279788 | 110280795 | 4.37 |
| chr8 | 110282799 | 110285378 | 3.7  |
| chr8 | 110293635 | 110294990 | 5.72 |
| chr8 | 110309692 | 110310963 | 4.71 |
| chr8 | 110316299 | 110318664 | 4.71 |
| chr8 | 110321405 | 110322566 | 4.71 |
| chr8 | 110345615 | 110347611 | 4.04 |
| chr8 | 110444617 | 110445529 | 4.37 |
| chr8 | 110475931 | 110476832 | 2.02 |
| chr8 | 110509002 | 110509741 | 2.02 |
| chr8 | 110551303 | 110553712 | 4.37 |
| chr8 | 110582239 | 110583007 | 3.7  |
| chr8 | 110589016 | 110591510 | 3.36 |
| chr8 | 110592744 | 110593531 | 3.7  |
| chr8 | 110605200 | 110606920 | 4.04 |
| chr8 | 110654629 | 110658145 | 4.71 |
| chr8 | 110676497 | 110677250 | 3.36 |
| chr8 | 110702759 | 110704350 | 4.71 |
| chr8 | 110722505 | 110723293 | 1.68 |
| chr8 | 110731400 | 110732248 | 3.7  |
| chr8 | 110735998 | 110737114 | 4.04 |
| chr8 | 110763958 | 110764722 | 4.04 |
| chr8 | 110847036 | 110847925 | 3.36 |
| chr8 | 110965357 | 110967358 | 4.37 |
| chr8 | 110986081 | 110987547 | 4.71 |
| chr8 | 110987777 | 110988864 | 2.69 |
| chr8 | 111074936 | 111076620 | 3.7  |
| chr8 | 111102699 | 111103470 | 4.37 |
| chr8 | 111136806 | 111137610 | 3.7  |
| chr8 | 111183363 | 111184703 | 4.37 |
| chr8 | 111185059 | 111186009 | 3.7  |

|      |           |           |       |
|------|-----------|-----------|-------|
| chr8 | 111215980 | 111216844 | 3.03  |
| chr8 | 111255541 | 111257725 | 4.37  |
| chr8 | 111276900 | 111278557 | 3.7   |
| chr8 | 111281796 | 111283509 | 4.71  |
| chr8 | 111298044 | 111298912 | 4.04  |
| chr8 | 111340871 | 111342741 | 3.7   |
| chr8 | 111367867 | 111369963 | 4.71  |
| chr8 | 111403095 | 111404046 | 4.04  |
| chr8 | 111484322 | 111486056 | 4.37  |
| chr8 | 111508084 | 111509065 | 3.7   |
| chr8 | 111529812 | 111530593 | 4.04  |
| chr8 | 111563643 | 111565427 | 4.04  |
| chr8 | 111579514 | 111580814 | 3.7   |
| chr8 | 111644771 | 111645898 | 4.37  |
| chr8 | 111658890 | 111660057 | 3.7   |
| chr8 | 111667356 | 111668179 | 4.37  |
| chr8 | 111668418 | 111669888 | 3.7   |
| chr8 | 111670768 | 111674224 | 4.04  |
| chr8 | 111681694 | 111682514 | 3.36  |
| chr8 | 111689421 | 111690878 | 3.36  |
| chr8 | 111718591 | 111719728 | 2.35  |
| chr8 | 111792530 | 111793421 | 3.7   |
| chr8 | 111799209 | 111800026 | 5.05  |
| chr8 | 111800932 | 111802162 | 3.36  |
| chr8 | 111805650 | 111806951 | 4.04  |
| chr8 | 111809856 | 111811774 | 10.43 |
| chr8 | 111812675 | 111813912 | 4.04  |
| chr8 | 111821010 | 111821884 | 3.36  |
| chr8 | 111825919 | 111826902 | 4.04  |
| chr8 | 111842343 | 111843177 | 4.37  |
| chr8 | 111872675 | 111874763 | 4.37  |
| chr8 | 111939074 | 111939972 | 3.36  |
| chr8 | 111954631 | 111955495 | 4.04  |
| chr8 | 112159670 | 112160854 | 4.04  |
| chr8 | 112163602 | 112164762 | 3.7   |
| chr8 | 112175912 | 112176752 | 4.04  |
| chr8 | 112243463 | 112244566 | 5.38  |
| chr8 | 112543661 | 112545226 | 6.39  |
| chr8 | 112677335 | 112678732 | 4.04  |
| chr8 | 113018781 | 113020619 | 7.06  |
| chr8 | 113020943 | 113022259 | 4.71  |
| chr8 | 113045008 | 113046034 | 4.04  |
| chr8 | 113089614 | 113091163 | 4.71  |



|      |           |           |       |
|------|-----------|-----------|-------|
| chr8 | 113127075 | 113128411 | 3.7   |
| chr8 | 113285879 | 113287149 | 4.71  |
| chr8 | 113288149 | 113290506 | 9.08  |
| chr8 | 114532198 | 114535043 | 8.07  |
| chr8 | 114537160 | 114538440 | 8.07  |
| chr8 | 115673579 | 115674958 | 5.38  |
| chr8 | 115830741 | 115831834 | 5.38  |
| chr8 | 115832359 | 115835063 | 9.42  |
| chr8 | 115904215 | 115905320 | 4.37  |
| chr8 | 115910467 | 115912002 | 4.71  |
| chr8 | 115925376 | 115926525 | 4.37  |
| chr8 | 115926989 | 115930433 | 15.14 |
| chr8 | 115993297 | 115994687 | 4.71  |
| chr8 | 116022081 | 116023211 | 4.37  |
| chr8 | 116061275 | 116062504 | 4.71  |
| chr8 | 116210683 | 116211909 | 5.38  |
| chr8 | 116288524 | 116289468 | 3.36  |
| chr8 | 116415885 | 116416807 | 4.04  |
| chr8 | 116483823 | 116484855 | 4.71  |
| chr8 | 116678915 | 116680561 | 4.37  |
| chr8 | 116720231 | 116723038 | 7.4   |
| chr8 | 116790285 | 116792035 | 4.37  |
| chr8 | 116811540 | 116813009 | 3.7   |
| chr8 | 116855688 | 116856505 | 3.36  |
| chr8 | 116942225 | 116943065 | 5.05  |
| chr8 | 116946530 | 116947452 | 3.7   |
| chr8 | 116950676 | 116951943 | 4.04  |
| chr8 | 116972871 | 116975133 | 5.05  |
| chr8 | 116984963 | 116988530 | 4.71  |
| chr8 | 116999605 | 117000800 | 3.7   |
| chr8 | 117010328 | 117011793 | 4.37  |
| chr8 | 117076050 | 117076854 | 3.7   |
| chr8 | 117078815 | 117087349 | 21.53 |
| chr8 | 117287273 | 117288681 | 5.38  |
| chr8 | 117322798 | 117324279 | 4.04  |
| chr8 | 117336780 | 117337715 | 3.7   |
| chr8 | 117382294 | 117383581 | 4.04  |
| chr8 | 117384695 | 117386672 | 5.05  |
| chr8 | 117485069 | 117486599 | 5.72  |
| chr8 | 117731458 | 117734173 | 8.07  |
| chr8 | 117809426 | 117810799 | 3.7   |
| chr8 | 117845009 | 117846403 | 4.37  |
| chr8 | 117849359 | 117850536 | 4.04  |

|      |           |           |      |
|------|-----------|-----------|------|
| chr8 | 117885564 | 117887605 | 4.37 |
| chr8 | 118057433 | 118058312 | 3.7  |
| chr8 | 118153837 | 118154755 | 3.36 |
| chr8 | 118279315 | 118280362 | 3.7  |
| chr8 | 118411129 | 118411939 | 4.04 |
| chr8 | 118435783 | 118437143 | 5.38 |
| chr8 | 118545694 | 118546890 | 4.04 |
| chr8 | 118925396 | 118926963 | 4.04 |
| chr8 | 119122544 | 119123733 | 3.7  |
| chr8 | 119170013 | 119170941 | 3.36 |
| chr8 | 119322232 | 119322990 | 4.04 |
| chr8 | 119566770 | 119568408 | 4.37 |
| chr8 | 119633480 | 119634669 | 4.37 |
| chr8 | 119865340 | 119866291 | 3.7  |
| chr8 | 119873879 | 119875183 | 4.04 |
| chr8 | 119890219 | 119890903 | 3.7  |
| chr8 | 119954478 | 119955401 | 3.7  |
| chr8 | 119997547 | 119998856 | 3.7  |
| chr8 | 120190725 | 120194451 | 4.71 |
| chr8 | 120221089 | 120222052 | 4.37 |
| chr8 | 120238420 | 120239397 | 3.36 |
| chr8 | 120288532 | 120292113 | 8.41 |
| chr8 | 120310872 | 120314709 | 8.75 |
| chr8 | 120526196 | 120527073 | 3.7  |
| chr8 | 120994400 | 120995592 | 3.7  |
| chr8 | 121456771 | 121458216 | 4.71 |
| chr8 | 121609435 | 121610933 | 4.04 |
| chr8 | 121666894 | 121669755 | 4.04 |
| chr8 | 121671932 | 121673129 | 4.37 |
| chr8 | 121674678 | 121676349 | 3.7  |
| chr8 | 121677622 | 121679427 | 4.37 |
| chr8 | 121723474 | 121724413 | 3.36 |
| chr8 | 121799363 | 121800740 | 3.7  |
| chr8 | 121822177 | 121824364 | 4.04 |
| chr8 | 121829438 | 121830300 | 3.7  |
| chr8 | 121831928 | 121833623 | 3.36 |
| chr8 | 121937041 | 121938219 | 2.35 |
| chr8 | 121958006 | 121959099 | 3.36 |
| chr8 | 121968527 | 121969540 | 4.04 |
| chr8 | 121972476 | 121974345 | 5.05 |
| chr8 | 121982426 | 121983756 | 5.72 |
| chr8 | 122009697 | 122012595 | 4.37 |
| chr8 | 122013077 | 122017137 | 4.71 |

|      |           |           |       |
|------|-----------|-----------|-------|
| chr8 | 122018314 | 122024827 | 6.05  |
| chr8 | 122025050 | 122029494 | 6.39  |
| chr8 | 122032091 | 122033555 | 3.7   |
| chr8 | 122040174 | 122041158 | 4.04  |
| chr8 | 122043063 | 122044249 | 4.04  |
| chr8 | 122045483 | 122048514 | 4.37  |
| chr8 | 122050141 | 122051509 | 3.03  |
| chr8 | 122051719 | 122052612 | 4.04  |
| chr8 | 122055584 | 122056599 | 3.03  |
| chr8 | 122057334 | 122059056 | 3.03  |
| chr8 | 122061968 | 122063446 | 4.37  |
| chr8 | 122072815 | 122074139 | 4.37  |
| chr8 | 122077177 | 122078273 | 3.36  |
| chr8 | 122078660 | 122083117 | 7.74  |
| chr8 | 122083896 | 122087597 | 4.71  |
| chr8 | 122089201 | 122093622 | 6.73  |
| chr8 | 122094452 | 122099793 | 5.38  |
| chr8 | 122100294 | 122103436 | 4.37  |
| chr8 | 122105948 | 122113756 | 5.05  |
| chr8 | 122115640 | 122117221 | 4.04  |
| chr8 | 122117604 | 122119954 | 4.37  |
| chr8 | 122124934 | 122126338 | 3.7   |
| chr8 | 122127465 | 122132871 | 5.05  |
| chr8 | 122133173 | 122134225 | 4.37  |
| chr8 | 122138809 | 122141584 | 4.04  |
| chr8 | 122144075 | 122147130 | 6.05  |
| chr8 | 122147907 | 122161415 | 12.45 |
| chr8 | 122162109 | 122163875 | 6.05  |
| chr8 | 122165027 | 122167500 | 5.05  |
| chr8 | 122169378 | 122170237 | 3.36  |
| chr8 | 122170706 | 122172529 | 4.37  |
| chr8 | 122173146 | 122175339 | 4.04  |
| chr8 | 122175670 | 122178499 | 5.05  |
| chr8 | 122183501 | 122184828 | 4.37  |
| chr8 | 122188307 | 122190250 | 4.04  |
| chr8 | 122191853 | 122194003 | 8.07  |
| chr8 | 122204901 | 122209477 | 4.37  |
| chr8 | 122214419 | 122215759 | 4.37  |
| chr8 | 122217452 | 122219806 | 4.71  |
| chr8 | 122224314 | 122225092 | 4.37  |
| chr8 | 122225350 | 122234216 | 10.43 |
| chr8 | 122236633 | 122238080 | 4.37  |
| chr8 | 122238781 | 122239737 | 3.03  |

|      |           |           |      |
|------|-----------|-----------|------|
| chr8 | 122243900 | 122245291 | 3.36 |
| chr8 | 122251744 | 122255340 | 4.71 |
| chr8 | 122260580 | 122261888 | 5.72 |
| chr8 | 122264838 | 122266118 | 4.37 |
| chr8 | 122268007 | 122269122 | 4.04 |
| chr8 | 122270854 | 122271937 | 4.04 |
| chr8 | 122272266 | 122273707 | 3.7  |
| chr8 | 122280451 | 122281728 | 4.71 |
| chr8 | 122322515 | 122323368 | 4.37 |
| chr8 | 122327619 | 122329396 | 4.04 |
| chr8 | 122350073 | 122350906 | 3.7  |
| chr8 | 122425315 | 122426199 | 4.04 |
| chr8 | 122426874 | 122429382 | 4.71 |
| chr8 | 122438873 | 122439911 | 5.38 |
| chr8 | 122471560 | 122472656 | 4.04 |
| chr8 | 122473573 | 122475487 | 4.71 |
| chr8 | 122483267 | 122484109 | 3.36 |
| chr8 | 122501772 | 122502734 | 4.04 |
| chr8 | 122503087 | 122504980 | 4.04 |
| chr8 | 122511642 | 122512689 | 3.7  |
| chr8 | 122541983 | 122543006 | 3.7  |
| chr8 | 122557638 | 122559128 | 3.36 |
| chr8 | 122573315 | 122574233 | 4.71 |
| chr8 | 122575694 | 122577202 | 3.7  |
| chr8 | 122580740 | 122581948 | 3.36 |
| chr8 | 122591138 | 122592419 | 4.04 |
| chr8 | 122606197 | 122607723 | 3.36 |
| chr8 | 122609199 | 122611134 | 3.7  |
| chr8 | 122622591 | 122623436 | 2.35 |
| chr8 | 122630530 | 122631810 | 3.36 |
| chr8 | 122650760 | 122653332 | 3.36 |
| chr8 | 122653551 | 122655075 | 5.05 |
| chr8 | 122667453 | 122668607 | 2.35 |
| chr8 | 122681466 | 122682983 | 3.7  |
| chr8 | 122700703 | 122701601 | 3.03 |
| chr8 | 122712985 | 122714382 | 4.37 |
| chr8 | 122730229 | 122733496 | 4.04 |
| chr8 | 122737154 | 122738008 | 3.03 |
| chr8 | 122745562 | 122746531 | 3.7  |
| chr8 | 122748404 | 122751581 | 3.7  |
| chr8 | 122767533 | 122771269 | 5.05 |
| chr8 | 122773656 | 122774566 | 3.7  |
| chr8 | 122826975 | 122828106 | 4.37 |

|      |           |           |      |
|------|-----------|-----------|------|
| chr8 | 122841834 | 122843004 | 5.38 |
| chr8 | 122849919 | 122851610 | 3.7  |
| chr8 | 122853463 | 122855507 | 5.38 |
| chr8 | 122864216 | 122865042 | 3.36 |
| chr8 | 122987609 | 122989031 | 3.36 |
| chr8 | 122996152 | 122996905 | 4.37 |
| chr8 | 122999380 | 123000241 | 3.03 |
| chr8 | 123011496 | 123012666 | 3.36 |
| chr8 | 123019990 | 123021367 | 3.03 |
| chr8 | 123027869 | 123029299 | 4.04 |
| chr8 | 123074021 | 123074856 | 4.37 |
| chr8 | 123089390 | 123090470 | 3.03 |
| chr8 | 123092970 | 123093773 | 3.36 |
| chr8 | 123112542 | 123113347 | 3.03 |
| chr8 | 123165963 | 123167082 | 2.02 |
| chr8 | 123193385 | 123194322 | 2.02 |
| chr8 | 123233588 | 123234449 | 3.36 |
| chr8 | 123248363 | 123249535 | 4.04 |
| chr8 | 123254438 | 123255971 | 3.7  |
| chr8 | 123264834 | 123265806 | 4.04 |
| chr8 | 123280722 | 123282022 | 2.69 |
| chr8 | 123380378 | 123381860 | 3.36 |
| chr8 | 123398735 | 123399830 | 3.7  |
| chr8 | 123410717 | 123411619 | 3.03 |
| chr8 | 123416184 | 123417117 | 3.7  |
| chr8 | 123452575 | 123453608 | 4.04 |
| chr8 | 123501004 | 123501986 | 4.04 |
| chr8 | 123506737 | 123507923 | 3.36 |
| chr8 | 123514181 | 123515716 | 4.04 |
| chr8 | 123519362 | 123521654 | 4.71 |
| chr8 | 123542176 | 123543053 | 3.36 |
| chr8 | 123552933 | 123553751 | 3.03 |
| chr8 | 123559479 | 123560321 | 3.36 |
| chr8 | 123560808 | 123562297 | 5.05 |
| chr8 | 123562847 | 123564146 | 3.7  |
| chr8 | 123585664 | 123586445 | 3.03 |
| chr8 | 123587668 | 123588751 | 4.71 |
| chr8 | 123592607 | 123593948 | 5.05 |
| chr8 | 123613990 | 123615408 | 4.37 |
| chr8 | 123620385 | 123622069 | 3.36 |
| chr8 | 123642360 | 123643174 | 3.36 |
| chr8 | 123652558 | 123654786 | 4.04 |
| chr8 | 123658651 | 123660045 | 3.03 |

|      |           |           |      |
|------|-----------|-----------|------|
| chr8 | 123660714 | 123666183 | 4.71 |
| chr8 | 123667435 | 123668920 | 4.04 |
| chr8 | 123680445 | 123681619 | 4.04 |
| chr8 | 123685241 | 123686384 | 3.36 |
| chr8 | 123695213 | 123699206 | 4.04 |
| chr8 | 123701284 | 123703245 | 5.72 |
| chr8 | 123705301 | 123708005 | 4.04 |
| chr8 | 123725799 | 123728252 | 3.36 |
| chr8 | 123733470 | 123734579 | 4.37 |
| chr8 | 123743774 | 123746626 | 4.71 |
| chr8 | 123757154 | 123758942 | 3.36 |
| chr8 | 123766201 | 123767701 | 3.7  |
| chr8 | 123772149 | 123773657 | 3.7  |
| chr8 | 123790990 | 123795502 | 6.39 |
| chr8 | 123797381 | 123799642 | 6.73 |
| chr8 | 123801136 | 123802054 | 3.36 |
| chr8 | 123803022 | 123803998 | 3.36 |
| chr8 | 123896735 | 123898074 | 5.05 |
| chr8 | 123901860 | 123904917 | 5.05 |
| chr8 | 123908336 | 123910445 | 3.7  |
| chr8 | 123911302 | 123912206 | 4.04 |
| chr8 | 123916663 | 123917956 | 4.37 |
| chr8 | 123921664 | 123924720 | 4.04 |
| chr8 | 123941950 | 123942919 | 3.03 |
| chr8 | 123976699 | 123977653 | 3.36 |
| chr8 | 123977889 | 123980056 | 3.36 |
| chr8 | 123993472 | 123995038 | 5.05 |
| chr8 | 124000652 | 124001861 | 4.04 |
| chr8 | 124006191 | 124008339 | 4.04 |
| chr8 | 124009252 | 124010823 | 5.38 |
| chr8 | 124027870 | 124028743 | 3.36 |
| chr8 | 124044500 | 124045322 | 4.04 |
| chr8 | 124053898 | 124055313 | 4.71 |
| chr8 | 124084612 | 124085733 | 4.37 |
| chr8 | 124088225 | 124089083 | 3.36 |
| chr8 | 124108067 | 124108984 | 4.37 |
| chr8 | 124118826 | 124120842 | 4.71 |
| chr8 | 124130513 | 124131329 | 4.04 |
| chr8 | 124135329 | 124136274 | 3.7  |
| chr8 | 124137527 | 124139045 | 4.04 |
| chr8 | 124145473 | 124146338 | 2.69 |
| chr8 | 124155338 | 124156253 | 3.03 |
| chr8 | 124162611 | 124163672 | 3.7  |

|      |           |           |      |
|------|-----------|-----------|------|
| chr8 | 124168789 | 124170813 | 5.38 |
| chr8 | 124172359 | 124173492 | 3.03 |
| chr8 | 124179296 | 124180564 | 5.72 |
| chr8 | 124184009 | 124186781 | 5.05 |
| chr8 | 124187728 | 124189303 | 3.36 |
| chr8 | 124190560 | 124195816 | 7.74 |
| chr8 | 124200692 | 124201713 | 4.37 |
| chr8 | 124203880 | 124204766 | 2.35 |
| chr8 | 124252675 | 124254082 | 4.04 |
| chr8 | 124273509 | 124274407 | 4.37 |
| chr8 | 124283907 | 124284981 | 3.7  |
| chr8 | 124285223 | 124290336 | 4.71 |
| chr8 | 124293382 | 124294615 | 4.04 |
| chr8 | 124300386 | 124301600 | 3.7  |
| chr8 | 124305611 | 124306597 | 3.7  |
| chr8 | 124314783 | 124316215 | 4.04 |
| chr8 | 124320479 | 124323940 | 4.71 |
| chr8 | 124352275 | 124353513 | 5.38 |
| chr8 | 124361882 | 124362977 | 3.03 |
| chr8 | 124372717 | 124373520 | 2.69 |
| chr8 | 124378734 | 124379473 | 4.71 |
| chr8 | 124386266 | 124387635 | 5.05 |
| chr8 | 124406780 | 124409692 | 8.41 |
| chr8 | 124425356 | 124426183 | 4.04 |
| chr8 | 124428148 | 124429814 | 3.36 |
| chr8 | 124443651 | 124444518 | 4.37 |
| chr8 | 124480724 | 124482138 | 4.71 |
| chr8 | 124496811 | 124497861 | 3.7  |
| chr8 | 124504683 | 124505756 | 4.37 |
| chr8 | 124509737 | 124510547 | 4.37 |
| chr8 | 124538796 | 124541220 | 4.71 |
| chr8 | 124543354 | 124545170 | 3.7  |
| chr8 | 124552868 | 124554940 | 5.38 |
| chr8 | 124566127 | 124567206 | 3.03 |
| chr8 | 124570763 | 124572193 | 3.7  |
| chr8 | 124573353 | 124578189 | 9.08 |
| chr8 | 124578466 | 124579839 | 3.7  |
| chr8 | 124580043 | 124581622 | 3.7  |
| chr8 | 124586021 | 124586874 | 3.7  |
| chr8 | 124587825 | 124588978 | 4.04 |
| chr8 | 124591983 | 124594006 | 5.05 |
| chr8 | 124595557 | 124599134 | 7.74 |
| chr8 | 124599560 | 124601909 | 4.04 |

|      |           |           |       |
|------|-----------|-----------|-------|
| chr8 | 124607165 | 124609970 | 5.38  |
| chr8 | 124613829 | 124615246 | 4.04  |
| chr8 | 124624842 | 124626870 | 4.04  |
| chr8 | 124627388 | 124629952 | 4.37  |
| chr8 | 124630544 | 124632184 | 4.37  |
| chr8 | 124632385 | 124635271 | 4.37  |
| chr8 | 124635680 | 124636910 | 3.7   |
| chr8 | 124639331 | 124640517 | 4.37  |
| chr8 | 124642125 | 124643888 | 4.37  |
| chr8 | 124644154 | 124645918 | 5.38  |
| chr8 | 124667650 | 124668833 | 4.04  |
| chr8 | 124669192 | 124670627 | 3.36  |
| chr8 | 124673684 | 124675087 | 4.04  |
| chr8 | 124677964 | 124682627 | 5.05  |
| chr8 | 124685110 | 124686971 | 3.7   |
| chr8 | 124689863 | 124691312 | 4.71  |
| chr8 | 124700312 | 124701307 | 2.35  |
| chr8 | 124701922 | 124702883 | 3.03  |
| chr8 | 124703716 | 124704735 | 3.36  |
| chr8 | 124713564 | 124714494 | 3.36  |
| chr8 | 124716898 | 124717763 | 2.69  |
| chr8 | 124718570 | 124719695 | 3.36  |
| chr8 | 124728642 | 124730150 | 3.7   |
| chr8 | 124735322 | 124736926 | 3.36  |
| chr8 | 124740582 | 124743620 | 5.05  |
| chr8 | 124747849 | 124749251 | 4.71  |
| chr8 | 124755740 | 124756932 | 4.04  |
| chr8 | 124759375 | 124760275 | 3.36  |
| chr8 | 124761178 | 124762576 | 3.36  |
| chr8 | 124763214 | 124769114 | 12.78 |
| chr8 | 124769462 | 124771007 | 4.04  |
| chr8 | 124771317 | 124774254 | 3.7   |
| chr8 | 124775059 | 124782032 | 4.71  |
| chr8 | 124802377 | 124803641 | 3.7   |
| chr8 | 124827765 | 124829262 | 2.69  |
| chr8 | 124829612 | 124830920 | 2.35  |
| chr8 | 124835862 | 124837212 | 4.04  |
| chr8 | 124837587 | 124840227 | 3.7   |
| chr8 | 124845309 | 124846561 | 3.7   |
| chr8 | 124853963 | 124855521 | 5.05  |
| chr8 | 124862733 | 124863739 | 3.36  |
| chr8 | 124870065 | 124871077 | 3.36  |
| chr8 | 124880567 | 124881463 | 3.36  |



|      |           |           |       |
|------|-----------|-----------|-------|
| chr8 | 124882380 | 124884087 | 3.7   |
| chr8 | 124885557 | 124886454 | 4.04  |
| chr8 | 124887465 | 124889002 | 4.71  |
| chr8 | 124893223 | 124894339 | 3.03  |
| chr8 | 124894925 | 124898085 | 4.71  |
| chr8 | 124898475 | 124904107 | 7.74  |
| chr8 | 124905172 | 124908875 | 4.37  |
| chr8 | 124915206 | 124917777 | 4.04  |
| chr8 | 124923016 | 124924837 | 4.04  |
| chr8 | 124928961 | 124929898 | 4.37  |
| chr8 | 124933834 | 124935433 | 4.04  |
| chr8 | 124939919 | 124941137 | 4.37  |
| chr8 | 124954878 | 124956046 | 5.05  |
| chr8 | 124963825 | 124966722 | 3.36  |
| chr8 | 124968538 | 124971211 | 4.04  |
| chr8 | 124975108 | 124976249 | 3.7   |
| chr8 | 124985446 | 124986570 | 3.7   |
| chr8 | 124987502 | 124989579 | 4.37  |
| chr8 | 124991091 | 124993077 | 4.04  |
| chr8 | 124996579 | 124999364 | 5.38  |
| chr8 | 125000564 | 125002258 | 4.04  |
| chr8 | 125006666 | 125011177 | 10.76 |
| chr8 | 125011737 | 125013217 | 3.7   |
| chr8 | 125018465 | 125019248 | 3.36  |
| chr8 | 125024501 | 125025955 | 3.7   |
| chr8 | 125029791 | 125030653 | 3.36  |
| chr8 | 125031346 | 125032200 | 3.03  |
| chr8 | 125033858 | 125035174 | 4.04  |
| chr8 | 125039673 | 125040721 | 3.7   |
| chr8 | 125062245 | 125064649 | 4.04  |
| chr8 | 125073980 | 125075478 | 3.7   |
| chr8 | 125084965 | 125085942 | 4.37  |
| chr8 | 125095943 | 125097211 | 3.36  |
| chr8 | 125100415 | 125101626 | 3.36  |
| chr8 | 125108450 | 125111181 | 4.04  |
| chr8 | 125119416 | 125120531 | 4.37  |
| chr8 | 125134336 | 125135447 | 4.04  |
| chr8 | 125135912 | 125137301 | 3.7   |
| chr8 | 125143706 | 125144862 | 4.04  |
| chr8 | 125148658 | 125151512 | 11.1  |
| chr8 | 125152150 | 125153756 | 3.7   |
| chr8 | 125163402 | 125164270 | 3.36  |
| chr8 | 125185161 | 125186572 | 4.04  |

|      |           |           |      |
|------|-----------|-----------|------|
| chr8 | 125192030 | 125193990 | 5.05 |
| chr8 | 125202387 | 125203305 | 3.03 |
| chr8 | 125211546 | 125213667 | 6.73 |
| chr8 | 125214332 | 125215253 | 2.69 |
| chr8 | 125219971 | 125222418 | 4.04 |
| chr8 | 125237979 | 125239059 | 4.04 |
| chr8 | 125240681 | 125241819 | 4.37 |
| chr8 | 125243447 | 125244499 | 3.36 |
| chr8 | 125245203 | 125246074 | 3.03 |
| chr8 | 125257778 | 125259612 | 4.04 |
| chr8 | 125263476 | 125264430 | 3.7  |
| chr8 | 125273431 | 125274899 | 3.03 |
| chr8 | 125351369 | 125352442 | 4.37 |
| chr8 | 125355929 | 125356845 | 2.02 |
| chr8 | 125360669 | 125361619 | 2.35 |
| chr8 | 125366285 | 125367687 | 3.03 |
| chr8 | 125382690 | 125387506 | 5.72 |
| chr8 | 125388674 | 125391018 | 4.04 |
| chr8 | 125402182 | 125403416 | 4.71 |
| chr8 | 125415164 | 125416106 | 3.7  |
| chr8 | 125419483 | 125420751 | 3.7  |
| chr8 | 125434698 | 125435506 | 2.69 |
| chr8 | 125437919 | 125441822 | 5.05 |
| chr8 | 125448323 | 125449839 | 3.36 |
| chr8 | 125456098 | 125457112 | 3.36 |
| chr8 | 125459448 | 125461496 | 4.04 |
| chr8 | 125462390 | 125464568 | 4.37 |
| chr8 | 125471823 | 125472999 | 3.7  |
| chr8 | 125475146 | 125476199 | 4.04 |
| chr8 | 125476429 | 125477241 | 3.7  |
| chr8 | 125485290 | 125487547 | 4.71 |
| chr8 | 125487755 | 125488984 | 4.04 |
| chr8 | 125489827 | 125491661 | 4.37 |
| chr8 | 125498984 | 125500524 | 3.7  |
| chr8 | 125502935 | 125504270 | 6.05 |
| chr8 | 125508010 | 125509628 | 3.36 |
| chr8 | 125538166 | 125540402 | 5.05 |
| chr8 | 125542525 | 125543695 | 3.7  |
| chr8 | 125547666 | 125552917 | 5.72 |
| chr8 | 125559623 | 125560480 | 2.35 |
| chr8 | 125561255 | 125562794 | 2.02 |
| chr8 | 125572707 | 125574707 | 3.7  |
| chr8 | 125576464 | 125577303 | 4.04 |

|      |           |           |      |
|------|-----------|-----------|------|
| chr8 | 125592153 | 125593485 | 3.36 |
| chr8 | 125604743 | 125606033 | 5.05 |
| chr8 | 125613408 | 125614426 | 4.71 |
| chr8 | 125630041 | 125630819 | 3.36 |
| chr8 | 125637996 | 125641149 | 5.05 |
| chr8 | 125641456 | 125643473 | 4.04 |
| chr8 | 125646165 | 125648516 | 4.37 |
| chr8 | 125653155 | 125654547 | 3.7  |
| chr8 | 125660874 | 125662311 | 3.03 |
| chr8 | 125666792 | 125668711 | 4.71 |
| chr8 | 125670184 | 125671728 | 3.7  |
| chr8 | 125678083 | 125679099 | 4.71 |
| chr8 | 125680603 | 125682943 | 3.7  |
| chr8 | 125687274 | 125689817 | 4.37 |
| chr8 | 125709398 | 125710757 | 4.71 |
| chr8 | 125720881 | 125722097 | 3.7  |
| chr8 | 125729933 | 125731346 | 3.7  |
| chr8 | 125733851 | 125734704 | 3.03 |
| chr8 | 125738669 | 125740694 | 4.04 |
| chr8 | 125753495 | 125755083 | 3.36 |
| chr8 | 125762345 | 125763213 | 4.04 |
| chr8 | 125763439 | 125764657 | 4.37 |
| chr8 | 125766607 | 125767934 | 3.7  |
| chr8 | 125769263 | 125770609 | 3.36 |
| chr8 | 125780567 | 125782435 | 4.04 |
| chr8 | 125785265 | 125786628 | 5.05 |
| chr8 | 125789805 | 125791944 | 4.04 |
| chr8 | 125792848 | 125795891 | 5.72 |
| chr8 | 125796250 | 125798389 | 5.38 |
| chr8 | 125801490 | 125802944 | 4.04 |
| chr8 | 125806726 | 125807664 | 4.37 |
| chr8 | 125808155 | 125809454 | 5.38 |
| chr8 | 125814197 | 125815719 | 5.05 |
| chr8 | 125819788 | 125824065 | 4.37 |
| chr8 | 125824989 | 125825776 | 3.36 |
| chr8 | 125827021 | 125828916 | 5.05 |
| chr8 | 125831611 | 125835905 | 3.7  |
| chr8 | 125841859 | 125843930 | 4.04 |
| chr8 | 125844249 | 125845671 | 4.04 |
| chr8 | 125846489 | 125847616 | 3.03 |
| chr8 | 125849028 | 125849963 | 3.7  |
| chr8 | 125852646 | 125853618 | 2.69 |
| chr8 | 125854539 | 125855970 | 4.71 |

|      |           |           |       |
|------|-----------|-----------|-------|
| chr8 | 125859406 | 125860927 | 3.36  |
| chr8 | 125861204 | 125872173 | 7.74  |
| chr8 | 125873365 | 125877614 | 4.37  |
| chr8 | 125879849 | 125883007 | 3.7   |
| chr8 | 125885770 | 125887295 | 4.37  |
| chr8 | 125889317 | 125892943 | 5.38  |
| chr8 | 125897348 | 125898250 | 3.36  |
| chr8 | 125898621 | 125900175 | 3.36  |
| chr8 | 125900563 | 125901885 | 4.71  |
| chr8 | 125903769 | 125911999 | 5.72  |
| chr8 | 125914903 | 125917964 | 4.37  |
| chr8 | 125918812 | 125920030 | 4.71  |
| chr8 | 125920919 | 125921845 | 4.04  |
| chr8 | 125922589 | 125928813 | 13.12 |
| chr8 | 125931840 | 125933340 | 3.36  |
| chr8 | 125934250 | 125935720 | 3.36  |
| chr8 | 125936253 | 125937630 | 4.04  |
| chr8 | 125938390 | 125945343 | 5.72  |
| chr8 | 125947935 | 125950613 | 4.37  |
| chr8 | 125950991 | 125964206 | 11.1  |
| chr8 | 125965738 | 125967100 | 3.7   |
| chr8 | 125967911 | 125970603 | 4.71  |
| chr8 | 125971260 | 125975320 | 5.38  |
| chr8 | 125975815 | 125978242 | 4.37  |
| chr8 | 125981923 | 126003699 | 27.24 |
| chr8 | 126004143 | 126006857 | 4.37  |
| chr8 | 126007550 | 126014793 | 6.73  |
| chr8 | 126015056 | 126016544 | 3.03  |
| chr8 | 126022959 | 126023768 | 3.36  |
| chr8 | 126025635 | 126027095 | 3.7   |
| chr8 | 126034171 | 126035265 | 2.69  |
| chr8 | 126036875 | 126038321 | 4.04  |
| chr8 | 126040038 | 126040830 | 4.04  |
| chr8 | 126041954 | 126042876 | 2.69  |
| chr8 | 126046699 | 126047863 | 3.7   |
| chr8 | 126048223 | 126049787 | 4.04  |
| chr8 | 126056247 | 126057224 | 2.35  |
| chr8 | 126074898 | 126076906 | 4.71  |
| chr8 | 126080902 | 126083886 | 7.74  |
| chr8 | 126101393 | 126102200 | 3.03  |
| chr8 | 126102961 | 126105940 | 5.38  |
| chr8 | 126111208 | 126112462 | 4.37  |
| chr8 | 126120056 | 126123781 | 4.37  |

|      |           |           |      |
|------|-----------|-----------|------|
| chr8 | 126127604 | 126128413 | 2.02 |
| chr8 | 126130636 | 126131872 | 4.04 |
| chr8 | 126133331 | 126135564 | 4.37 |
| chr8 | 126146866 | 126147833 | 3.03 |
| chr8 | 126152870 | 126154401 | 3.36 |
| chr8 | 126163640 | 126164670 | 3.7  |
| chr8 | 126165574 | 126166576 | 3.7  |
| chr8 | 126175015 | 126176054 | 3.7  |
| chr8 | 126186565 | 126187454 | 3.7  |
| chr8 | 126188958 | 126190795 | 3.7  |
| chr8 | 126200376 | 126202878 | 4.71 |
| chr8 | 126203516 | 126204853 | 3.7  |
| chr8 | 126217533 | 126218528 | 3.7  |
| chr8 | 126219450 | 126220900 | 4.37 |
| chr8 | 126230983 | 126232709 | 5.72 |
| chr8 | 126242396 | 126243563 | 3.03 |
| chr8 | 126247681 | 126248721 | 3.36 |
| chr8 | 126265211 | 126267206 | 3.03 |
| chr8 | 126269924 | 126271092 | 3.7  |
| chr8 | 126281042 | 126283366 | 4.04 |
| chr8 | 126284845 | 126286966 | 4.71 |
| chr8 | 126287680 | 126288884 | 3.7  |
| chr8 | 126290795 | 126293782 | 4.37 |
| chr8 | 126294572 | 126295431 | 3.7  |
| chr8 | 126296703 | 126298153 | 3.7  |
| chr8 | 126301003 | 126302413 | 3.7  |
| chr8 | 126318457 | 126319665 | 3.7  |
| chr8 | 126325512 | 126326454 | 3.03 |
| chr8 | 126330901 | 126332307 | 3.36 |
| chr8 | 126332777 | 126333855 | 4.04 |
| chr8 | 126348077 | 126349508 | 5.38 |
| chr8 | 126356973 | 126358343 | 4.37 |
| chr8 | 126360051 | 126361908 | 5.05 |
| chr8 | 126368793 | 126370222 | 4.04 |
| chr8 | 126374249 | 126375209 | 4.04 |
| chr8 | 126376535 | 126377911 | 3.03 |
| chr8 | 126389396 | 126390458 | 3.7  |
| chr8 | 126390897 | 126391686 | 3.7  |
| chr8 | 126393315 | 126394312 | 4.04 |
| chr8 | 126396721 | 126399070 | 4.04 |
| chr8 | 126400799 | 126402345 | 3.03 |
| chr8 | 126413610 | 126414513 | 2.69 |
| chr8 | 126422201 | 126423438 | 4.04 |

|      |           |           |      |
|------|-----------|-----------|------|
| chr8 | 126423909 | 126425520 | 4.37 |
| chr8 | 126433376 | 126434337 | 4.04 |
| chr8 | 126435952 | 126437341 | 3.7  |
| chr8 | 126438033 | 126440052 | 4.04 |
| chr8 | 126440840 | 126444745 | 8.07 |
| chr8 | 126445404 | 126446258 | 3.7  |
| chr8 | 126446597 | 126447431 | 4.37 |
| chr8 | 126448537 | 126449391 | 1.68 |
| chr8 | 126450013 | 126451025 | 3.36 |
| chr8 | 126453638 | 126455176 | 4.37 |
| chr8 | 126455542 | 126456640 | 2.35 |
| chr8 | 126456907 | 126458762 | 3.36 |
| chr8 | 126460158 | 126461037 | 3.7  |
| chr8 | 126463587 | 126466271 | 4.71 |
| chr8 | 126467263 | 126472706 | 4.04 |
| chr8 | 126475803 | 126476985 | 5.38 |
| chr8 | 126477187 | 126478432 | 4.37 |
| chr8 | 126481166 | 126483288 | 4.04 |
| chr8 | 126487197 | 126490095 | 4.71 |
| chr8 | 126490740 | 126491436 | 2.35 |
| chr8 | 126493082 | 126494050 | 4.04 |
| chr8 | 126496659 | 126498282 | 3.03 |
| chr8 | 126499889 | 126500958 | 2.02 |
| chr8 | 126501552 | 126504716 | 4.37 |
| chr8 | 126509231 | 126510268 | 3.03 |
| chr8 | 126513797 | 126515198 | 4.04 |
| chr8 | 126521237 | 126522411 | 4.37 |
| chr8 | 126523009 | 126524296 | 4.37 |
| chr8 | 126524612 | 126526112 | 5.05 |
| chr8 | 126526634 | 126527779 | 4.71 |
| chr8 | 126529117 | 126530786 | 4.37 |
| chr8 | 126532604 | 126533881 | 4.37 |
| chr8 | 126535617 | 126536431 | 3.36 |
| chr8 | 126537392 | 126545441 | 4.71 |
| chr8 | 126546038 | 126547131 | 4.04 |
| chr8 | 126552959 | 126560342 | 4.37 |
| chr8 | 126560598 | 126561551 | 4.04 |
| chr8 | 126565195 | 126566559 | 4.04 |
| chr8 | 126567081 | 126569831 | 3.03 |
| chr8 | 126573837 | 126574608 | 3.36 |
| chr8 | 126580864 | 126582454 | 4.04 |
| chr8 | 126590153 | 126591018 | 3.7  |
| chr8 | 126591444 | 126595011 | 4.37 |

|      |           |           |      |
|------|-----------|-----------|------|
| chr8 | 126601884 | 126603281 | 3.7  |
| chr8 | 126604030 | 126604968 | 4.71 |
| chr8 | 126605605 | 126607161 | 5.72 |
| chr8 | 126611129 | 126611985 | 3.03 |
| chr8 | 126614678 | 126615497 | 2.69 |
| chr8 | 126615992 | 126617263 | 3.03 |
| chr8 | 126618558 | 126620065 | 4.04 |
| chr8 | 126622086 | 126624755 | 5.05 |
| chr8 | 126629171 | 126630088 | 2.02 |
| chr8 | 126635524 | 126637573 | 3.36 |
| chr8 | 126638100 | 126639018 | 2.35 |
| chr8 | 126639405 | 126640140 | 3.36 |
| chr8 | 126642275 | 126644274 | 4.04 |
| chr8 | 126645492 | 126646752 | 5.38 |
| chr8 | 126655314 | 126657681 | 6.39 |
| chr8 | 126658107 | 126659385 | 3.7  |
| chr8 | 126659713 | 126661944 | 4.71 |
| chr8 | 126662390 | 126663891 | 3.7  |
| chr8 | 126669740 | 126671095 | 3.7  |
| chr8 | 126671923 | 126672807 | 3.03 |
| chr8 | 126676483 | 126677540 | 3.7  |
| chr8 | 126679367 | 126681418 | 4.37 |
| chr8 | 126681789 | 126682502 | 3.7  |
| chr8 | 126686640 | 126689200 | 4.04 |
| chr8 | 126691296 | 126693150 | 3.7  |
| chr8 | 126698614 | 126700629 | 4.04 |
| chr8 | 126704606 | 126705719 | 4.37 |
| chr8 | 126708471 | 126710268 | 4.04 |
| chr8 | 126711712 | 126713732 | 4.37 |
| chr8 | 126716839 | 126719161 | 4.04 |
| chr8 | 126719444 | 126727294 | 7.74 |
| chr8 | 126731440 | 126733905 | 4.04 |
| chr8 | 126740317 | 126742820 | 5.72 |
| chr8 | 126743723 | 126744929 | 4.37 |
| chr8 | 126745991 | 126750931 | 8.75 |
| chr8 | 126755705 | 126757748 | 3.7  |
| chr8 | 126758911 | 126760890 | 3.36 |
| chr8 | 126764028 | 126766584 | 3.7  |
| chr8 | 126769295 | 126771356 | 4.71 |
| chr8 | 126772565 | 126774332 | 4.04 |
| chr8 | 126781266 | 126784417 | 4.37 |
| chr8 | 126786888 | 126789356 | 4.37 |
| chr8 | 126796965 | 126797767 | 4.04 |

|      |           |           |      |
|------|-----------|-----------|------|
| chr8 | 126798944 | 126800426 | 3.7  |
| chr8 | 126807331 | 126812033 | 4.37 |
| chr8 | 126814766 | 126815664 | 3.03 |
| chr8 | 126817114 | 126818857 | 3.7  |
| chr8 | 126828214 | 126829526 | 4.04 |
| chr8 | 126836244 | 126837731 | 4.04 |
| chr8 | 126840102 | 126841127 | 3.03 |
| chr8 | 126847515 | 126849007 | 4.37 |
| chr8 | 126849895 | 126850699 | 2.35 |
| chr8 | 126856924 | 126858085 | 3.36 |
| chr8 | 126865286 | 126866204 | 3.03 |
| chr8 | 126875098 | 126877320 | 4.04 |
| chr8 | 126880633 | 126882297 | 4.04 |
| chr8 | 126887367 | 126888328 | 2.69 |
| chr8 | 126891937 | 126892776 | 3.03 |
| chr8 | 126897988 | 126898765 | 2.69 |
| chr8 | 126908814 | 126909522 | 2.02 |
| chr8 | 126930001 | 126930922 | 4.37 |
| chr8 | 126946022 | 126947078 | 3.36 |
| chr8 | 126950866 | 126951670 | 3.36 |
| chr8 | 126954257 | 126955180 | 2.69 |
| chr8 | 126957971 | 126959374 | 4.37 |
| chr8 | 126969763 | 126971035 | 3.03 |
| chr8 | 126984195 | 126985041 | 3.03 |
| chr8 | 126986175 | 126988269 | 3.7  |
| chr8 | 126993270 | 126994961 | 5.05 |
| chr8 | 127012034 | 127012973 | 5.05 |
| chr8 | 127019029 | 127019926 | 2.35 |
| chr8 | 127026090 | 127028077 | 5.38 |
| chr8 | 127049740 | 127051299 | 4.04 |
| chr8 | 127059636 | 127061022 | 4.71 |
| chr8 | 127062984 | 127064395 | 5.72 |
| chr8 | 127069698 | 127070784 | 2.69 |
| chr8 | 127073187 | 127074554 | 4.04 |
| chr8 | 127076249 | 127077311 | 3.7  |
| chr8 | 127081274 | 127082796 | 4.04 |
| chr8 | 127084097 | 127084923 | 4.37 |
| chr8 | 127086176 | 127089062 | 3.36 |
| chr8 | 127089512 | 127091017 | 3.36 |
| chr8 | 127091587 | 127093621 | 3.7  |
| chr8 | 127095449 | 127096781 | 5.05 |
| chr8 | 127104494 | 127106243 | 3.7  |
| chr8 | 127108051 | 127109658 | 4.04 |



|      |           |           |       |
|------|-----------|-----------|-------|
| chr8 | 127110445 | 127111487 | 3.7   |
| chr8 | 127114833 | 127115795 | 4.04  |
| chr8 | 127116407 | 127117544 | 4.04  |
| chr8 | 127120855 | 127122908 | 4.04  |
| chr8 | 127124858 | 127125561 | 3.03  |
| chr8 | 127127011 | 127127830 | 3.7   |
| chr8 | 127133314 | 127135287 | 4.37  |
| chr8 | 127141000 | 127143317 | 3.7   |
| chr8 | 127146153 | 127147409 | 3.7   |
| chr8 | 127148359 | 127149912 | 4.37  |
| chr8 | 127152331 | 127153125 | 2.69  |
| chr8 | 127154352 | 127155694 | 5.38  |
| chr8 | 127158348 | 127159582 | 4.37  |
| chr8 | 127161155 | 127164887 | 6.73  |
| chr8 | 127165109 | 127166592 | 3.7   |
| chr8 | 127169475 | 127170600 | 3.03  |
| chr8 | 127171644 | 127172505 | 4.04  |
| chr8 | 127179525 | 127180426 | 3.36  |
| chr8 | 127194793 | 127196253 | 3.36  |
| chr8 | 127196522 | 127197892 | 3.7   |
| chr8 | 127222753 | 127225993 | 3.7   |
| chr8 | 127226826 | 127228447 | 3.7   |
| chr8 | 127228788 | 127236496 | 10.43 |
| chr8 | 127245865 | 127246690 | 3.7   |
| chr8 | 127249093 | 127251876 | 4.04  |
| chr8 | 127252443 | 127253452 | 4.37  |
| chr8 | 127256379 | 127257448 | 4.04  |
| chr8 | 127260122 | 127261111 | 4.04  |
| chr8 | 127273043 | 127274010 | 3.03  |
| chr8 | 127276485 | 127277775 | 5.05  |
| chr8 | 127286311 | 127288994 | 6.73  |
| chr8 | 127292086 | 127293387 | 4.71  |
| chr8 | 127293712 | 127296258 | 4.04  |
| chr8 | 127312527 | 127313921 | 5.72  |
| chr8 | 127316281 | 127319771 | 5.05  |
| chr8 | 127323517 | 127325590 | 4.71  |
| chr8 | 127334753 | 127336161 | 3.7   |
| chr8 | 127338378 | 127339284 | 3.36  |
| chr8 | 127339586 | 127340443 | 3.03  |
| chr8 | 127343104 | 127344726 | 3.7   |
| chr8 | 127348854 | 127351013 | 5.05  |
| chr8 | 127359760 | 127362318 | 5.05  |
| chr8 | 127363061 | 127368021 | 6.05  |

|      |           |           |      |
|------|-----------|-----------|------|
| chr8 | 127368630 | 127370563 | 4.71 |
| chr8 | 127376086 | 127377532 | 3.7  |
| chr8 | 127379446 | 127380344 | 4.04 |
| chr8 | 127381196 | 127382596 | 2.69 |
| chr8 | 127384629 | 127388452 | 3.7  |
| chr8 | 127389290 | 127390324 | 3.7  |
| chr8 | 127391220 | 127392239 | 3.03 |
| chr8 | 127393770 | 127397291 | 3.7  |
| chr8 | 127403929 | 127407642 | 4.37 |
| chr8 | 127420448 | 127421314 | 4.04 |
| chr8 | 127428636 | 127429730 | 3.36 |
| chr8 | 127443216 | 127444308 | 3.36 |
| chr8 | 127445262 | 127450357 | 7.4  |
| chr8 | 127456035 | 127459005 | 4.71 |
| chr8 | 127459528 | 127461696 | 3.7  |
| chr8 | 127462465 | 127463312 | 3.7  |
| chr8 | 127475475 | 127476636 | 4.71 |
| chr8 | 127479768 | 127480879 | 2.69 |
| chr8 | 127483034 | 127484971 | 3.36 |
| chr8 | 127486663 | 127488100 | 3.7  |
| chr8 | 127489309 | 127491118 | 4.71 |
| chr8 | 127492332 | 127493306 | 3.7  |
| chr8 | 127502253 | 127505196 | 4.04 |
| chr8 | 127508872 | 127512226 | 4.04 |
| chr8 | 127513241 | 127514253 | 2.35 |
| chr8 | 127515593 | 127516837 | 3.03 |
| chr8 | 127520274 | 127521893 | 2.69 |
| chr8 | 127522294 | 127523475 | 4.04 |
| chr8 | 127527350 | 127528402 | 4.37 |
| chr8 | 127529001 | 127531315 | 3.36 |
| chr8 | 127534595 | 127536106 | 4.04 |
| chr8 | 127536429 | 127538126 | 4.37 |
| chr8 | 127540807 | 127541747 | 4.04 |
| chr8 | 127543146 | 127548451 | 7.06 |
| chr8 | 127551832 | 127552674 | 4.04 |
| chr8 | 127558172 | 127560060 | 4.37 |
| chr8 | 127565983 | 127571740 | 6.73 |
| chr8 | 127574708 | 127575803 | 3.36 |
| chr8 | 127576145 | 127577921 | 4.04 |
| chr8 | 127582219 | 127588966 | 6.73 |
| chr8 | 127589940 | 127592348 | 4.71 |
| chr8 | 127594474 | 127597800 | 5.38 |
| chr8 | 127600575 | 127601967 | 4.71 |

|      |           |           |      |
|------|-----------|-----------|------|
| chr8 | 127609306 | 127615082 | 7.06 |
| chr8 | 127615386 | 127617671 | 6.73 |
| chr8 | 127620921 | 127622763 | 7.06 |
| chr8 | 127623233 | 127624462 | 4.04 |
| chr8 | 127624792 | 127625986 | 3.7  |
| chr8 | 127626373 | 127628332 | 5.05 |
| chr8 | 127628853 | 127632537 | 5.05 |
| chr8 | 127639428 | 127640604 | 3.7  |
| chr8 | 127641698 | 127643095 | 3.03 |
| chr8 | 127661751 | 127663336 | 3.7  |
| chr8 | 127667573 | 127670301 | 4.37 |
| chr8 | 127679881 | 127681349 | 3.36 |
| chr8 | 127682593 | 127685130 | 4.37 |
| chr8 | 127687447 | 127689506 | 4.37 |
| chr8 | 127696350 | 127698557 | 4.71 |
| chr8 | 127700481 | 127701870 | 4.04 |
| chr8 | 127704298 | 127706304 | 5.38 |
| chr8 | 127707428 | 127708685 | 4.71 |
| chr8 | 127711130 | 127712091 | 4.04 |
| chr8 | 127714792 | 127716038 | 3.36 |
| chr8 | 127716741 | 127720508 | 4.71 |
| chr8 | 127744844 | 127746096 | 5.38 |
| chr8 | 127747163 | 127749358 | 3.7  |
| chr8 | 127751064 | 127752148 | 5.72 |
| chr8 | 127753809 | 127755169 | 3.03 |
| chr8 | 127755863 | 127758779 | 3.7  |
| chr8 | 127770767 | 127772904 | 4.04 |
| chr8 | 127773360 | 127774276 | 4.04 |
| chr8 | 127775706 | 127777339 | 4.37 |
| chr8 | 127777689 | 127779776 | 3.03 |
| chr8 | 127780880 | 127782052 | 2.02 |
| chr8 | 127782366 | 127783455 | 4.04 |
| chr8 | 127785541 | 127786682 | 4.04 |
| chr8 | 127787377 | 127788516 | 3.7  |
| chr8 | 127792061 | 127793587 | 4.37 |
| chr8 | 127802856 | 127803811 | 3.36 |
| chr8 | 127963516 | 127964487 | 3.36 |
| chr8 | 128131250 | 128133319 | 4.04 |
| chr8 | 128134403 | 128135485 | 3.36 |
| chr8 | 128136396 | 128137588 | 4.37 |
| chr8 | 128138206 | 128141216 | 5.05 |
| chr8 | 128142703 | 128143844 | 3.7  |
| chr8 | 128150912 | 128168084 | 9.42 |

|      |           |           |      |
|------|-----------|-----------|------|
| chr8 | 128168679 | 128172472 | 4.71 |
| chr8 | 128174115 | 128175918 | 3.03 |
| chr8 | 128178434 | 128179803 | 4.71 |
| chr8 | 128182956 | 128183887 | 4.04 |
| chr8 | 128193000 | 128194641 | 4.37 |
| chr8 | 128203636 | 128204511 | 4.04 |
| chr8 | 128207007 | 128208144 | 3.36 |
| chr8 | 128213786 | 128214783 | 3.7  |
| chr8 | 128217524 | 128218981 | 3.03 |
| chr8 | 128219399 | 128220370 | 3.7  |
| chr8 | 128220597 | 128222070 | 3.36 |
| chr8 | 128225215 | 128229611 | 5.05 |
| chr8 | 128230775 | 128232342 | 3.36 |
| chr8 | 128232555 | 128234119 | 4.04 |
| chr8 | 128234531 | 128235856 | 3.36 |
| chr8 | 128236238 | 128238089 | 3.7  |
| chr8 | 128239744 | 128241222 | 3.36 |
| chr8 | 128245364 | 128246343 | 3.7  |
| chr8 | 128253256 | 128255428 | 4.04 |
| chr8 | 128257734 | 128259803 | 3.36 |
| chr8 | 128262681 | 128263699 | 3.03 |
| chr8 | 128265365 | 128266698 | 3.7  |
| chr8 | 128269027 | 128269771 | 3.36 |
| chr8 | 128271075 | 128272345 | 2.35 |
| chr8 | 128273987 | 128275164 | 4.37 |
| chr8 | 128275959 | 128278793 | 3.7  |
| chr8 | 128279241 | 128281662 | 4.71 |
| chr8 | 128281866 | 128284864 | 5.72 |
| chr8 | 128293990 | 128294943 | 3.36 |
| chr8 | 128295605 | 128296578 | 3.36 |
| chr8 | 128297628 | 128298733 | 3.03 |
| chr8 | 128299288 | 128300096 | 4.04 |
| chr8 | 128300976 | 128301890 | 4.04 |
| chr8 | 128304864 | 128308411 | 3.7  |
| chr8 | 128311974 | 128313466 | 3.7  |
| chr8 | 128315052 | 128320190 | 4.71 |
| chr8 | 128332931 | 128336046 | 5.05 |
| chr8 | 128336327 | 128337780 | 5.05 |
| chr8 | 128340235 | 128341391 | 3.7  |
| chr8 | 128344532 | 128346678 | 5.05 |
| chr8 | 128347239 | 128348829 | 4.04 |
| chr8 | 128349400 | 128350824 | 4.04 |
| chr8 | 128352771 | 128355020 | 4.04 |

|      |           |           |      |
|------|-----------|-----------|------|
| chr8 | 128355930 | 128356745 | 3.7  |
| chr8 | 128356963 | 128358282 | 3.7  |
| chr8 | 128360733 | 128361637 | 3.36 |
| chr8 | 128364027 | 128366077 | 4.37 |
| chr8 | 128372982 | 128374120 | 4.04 |
| chr8 | 128375715 | 128377786 | 4.04 |
| chr8 | 128383241 | 128384229 | 3.36 |
| chr8 | 128391100 | 128391952 | 3.36 |
| chr8 | 128394436 | 128396601 | 3.7  |
| chr8 | 128399139 | 128401891 | 4.71 |
| chr8 | 128402128 | 128404213 | 4.04 |
| chr8 | 128405697 | 128406748 | 3.36 |
| chr8 | 128407938 | 128409302 | 5.05 |
| chr8 | 128409901 | 128411835 | 3.7  |
| chr8 | 128412360 | 128414222 | 4.37 |
| chr8 | 128414905 | 128416488 | 3.36 |
| chr8 | 128418536 | 128420308 | 4.37 |
| chr8 | 128423233 | 128425619 | 4.04 |
| chr8 | 128425936 | 128428529 | 4.71 |
| chr8 | 128431292 | 128432722 | 3.03 |
| chr8 | 128437026 | 128439325 | 3.7  |
| chr8 | 128441625 | 128443228 | 4.71 |
| chr8 | 128451696 | 128453302 | 3.36 |
| chr8 | 128453598 | 128455152 | 3.36 |
| chr8 | 128469097 | 128470603 | 3.7  |
| chr8 | 128474016 | 128475329 | 5.72 |
| chr8 | 128476806 | 128479146 | 4.37 |
| chr8 | 128479374 | 128480901 | 4.04 |
| chr8 | 128481148 | 128484165 | 4.71 |
| chr8 | 128494716 | 128496155 | 3.7  |
| chr8 | 128499924 | 128501070 | 3.7  |
| chr8 | 128501297 | 128502365 | 3.7  |
| chr8 | 128507666 | 128513039 | 4.37 |
| chr8 | 128524456 | 128527343 | 4.04 |
| chr8 | 128531028 | 128533370 | 4.04 |
| chr8 | 128537862 | 128538724 | 3.36 |
| chr8 | 128539394 | 128540177 | 2.35 |
| chr8 | 128543646 | 128544892 | 6.39 |
| chr8 | 128545506 | 128552258 | 4.04 |
| chr8 | 128555431 | 128557212 | 5.38 |
| chr8 | 128557784 | 128560218 | 4.04 |
| chr8 | 128561319 | 128563426 | 4.71 |
| chr8 | 128563836 | 128571176 | 5.72 |

|      |           |           |      |
|------|-----------|-----------|------|
| chr8 | 128572713 | 128574085 | 4.71 |
| chr8 | 128577355 | 128580185 | 3.36 |
| chr8 | 128581597 | 128583104 | 3.03 |
| chr8 | 128584444 | 128590780 | 5.38 |
| chr8 | 128592266 | 128594836 | 4.04 |
| chr8 | 128597963 | 128599148 | 3.7  |
| chr8 | 128601935 | 128602879 | 4.37 |
| chr8 | 128604599 | 128606298 | 4.37 |
| chr8 | 128607074 | 128610373 | 4.71 |
| chr8 | 128611536 | 128613184 | 4.04 |
| chr8 | 128614104 | 128615215 | 3.03 |
| chr8 | 128616709 | 128619544 | 5.05 |
| chr8 | 128626974 | 128627875 | 4.37 |
| chr8 | 128634055 | 128635316 | 3.36 |
| chr8 | 128638053 | 128641161 | 4.04 |
| chr8 | 128641378 | 128642519 | 4.37 |
| chr8 | 128648509 | 128649938 | 3.36 |
| chr8 | 128651430 | 128654298 | 3.7  |
| chr8 | 128657100 | 128658834 | 3.7  |
| chr8 | 128664838 | 128667382 | 4.37 |
| chr8 | 128672445 | 128675242 | 4.71 |
| chr8 | 128676789 | 128683572 | 8.07 |
| chr8 | 128684044 | 128685304 | 4.71 |
| chr8 | 128687037 | 128689213 | 4.04 |
| chr8 | 128689704 | 128690513 | 3.7  |
| chr8 | 128694778 | 128695930 | 4.37 |
| chr8 | 128700213 | 128701610 | 3.7  |
| chr8 | 128705532 | 128707555 | 3.7  |
| chr8 | 128708342 | 128709638 | 3.36 |
| chr8 | 128710720 | 128712815 | 4.04 |
| chr8 | 128713720 | 128714911 | 2.69 |
| chr8 | 128723950 | 128725963 | 4.37 |
| chr8 | 128729146 | 128732913 | 5.05 |
| chr8 | 128733464 | 128734992 | 3.03 |
| chr8 | 128735734 | 128736753 | 3.7  |
| chr8 | 128739027 | 128743006 | 4.37 |
| chr8 | 128743439 | 128753329 | 6.39 |
| chr8 | 128754847 | 128756073 | 4.37 |
| chr8 | 128760322 | 128762192 | 4.71 |
| chr8 | 128762941 | 128764559 | 5.38 |
| chr8 | 128765614 | 128767202 | 5.05 |
| chr8 | 128772151 | 128773579 | 3.36 |
| chr8 | 128775290 | 128776301 | 2.69 |

|      |           |           |      |
|------|-----------|-----------|------|
| chr8 | 128776904 | 128779612 | 5.05 |
| chr8 | 128784098 | 128785671 | 3.7  |
| chr8 | 128786124 | 128787765 | 4.04 |
| chr8 | 128793908 | 128799248 | 5.72 |
| chr8 | 128806194 | 128810398 | 5.38 |
| chr8 | 128810884 | 128814564 | 8.75 |
| chr8 | 128820052 | 128824148 | 6.05 |
| chr8 | 128829749 | 128831213 | 3.03 |
| chr8 | 128831465 | 128832787 | 4.04 |
| chr8 | 128836354 | 128837972 | 3.36 |
| chr8 | 128839508 | 128840894 | 4.37 |
| chr8 | 128843413 | 128844478 | 4.04 |
| chr8 | 128844921 | 128845986 | 4.04 |
| chr8 | 128847563 | 128849653 | 3.7  |
| chr8 | 128850889 | 128851805 | 3.36 |
| chr8 | 128852352 | 128855530 | 4.04 |
| chr8 | 128859554 | 128860595 | 3.7  |
| chr8 | 128860985 | 128861966 | 7.4  |
| chr8 | 128862175 | 128865508 | 7.74 |
| chr8 | 128865843 | 128868228 | 4.37 |
| chr8 | 128870317 | 128873150 | 8.07 |
| chr8 | 128875493 | 128880135 | 5.72 |
| chr8 | 128881656 | 128884245 | 6.73 |
| chr8 | 128884613 | 128886817 | 4.04 |
| chr8 | 128888253 | 128889829 | 2.69 |
| chr8 | 128891549 | 128892590 | 3.36 |
| chr8 | 128897325 | 128898782 | 4.37 |
| chr8 | 128900289 | 128901396 | 5.05 |
| chr8 | 128901730 | 128905152 | 3.7  |
| chr8 | 128906078 | 128906891 | 3.7  |
| chr8 | 128910597 | 128912085 | 3.03 |
| chr8 | 128912607 | 128913495 | 3.03 |
| chr8 | 128914274 | 128918947 | 4.37 |
| chr8 | 128921068 | 128922586 | 3.7  |
| chr8 | 128923144 | 128925221 | 4.37 |
| chr8 | 128931604 | 128933620 | 4.04 |
| chr8 | 128934539 | 128936374 | 4.04 |
| chr8 | 128937146 | 128938763 | 3.03 |
| chr8 | 128940447 | 128941256 | 3.36 |
| chr8 | 128942082 | 128943111 | 3.03 |
| chr8 | 128946373 | 128947283 | 3.36 |
| chr8 | 128952456 | 128953745 | 4.37 |
| chr8 | 128954097 | 128955598 | 3.7  |

|      |           |           |      |
|------|-----------|-----------|------|
| chr8 | 128957766 | 128958632 | 3.7  |
| chr8 | 128960864 | 128963113 | 4.37 |
| chr8 | 128963792 | 128965358 | 5.38 |
| chr8 | 128970394 | 128971319 | 3.36 |
| chr8 | 128971721 | 128974301 | 3.36 |
| chr8 | 128981555 | 128982683 | 4.37 |
| chr8 | 128983055 | 128984701 | 3.7  |
| chr8 | 128984962 | 128985803 | 4.04 |
| chr8 | 128997929 | 128999200 | 3.36 |
| chr8 | 128999815 | 129003414 | 3.7  |
| chr8 | 129004155 | 129005329 | 5.05 |
| chr8 | 129011928 | 129012976 | 3.36 |
| chr8 | 129014096 | 129015119 | 4.04 |
| chr8 | 129023023 | 129024797 | 3.36 |
| chr8 | 129029219 | 129030202 | 3.36 |
| chr8 | 129031139 | 129032027 | 3.7  |
| chr8 | 129035378 | 129039789 | 7.4  |
| chr8 | 129044468 | 129047979 | 5.05 |
| chr8 | 129048605 | 129050241 | 3.36 |
| chr8 | 129051572 | 129052797 | 4.37 |
| chr8 | 129058663 | 129059475 | 3.7  |
| chr8 | 129059917 | 129061129 | 3.36 |
| chr8 | 129061951 | 129063728 | 3.7  |
| chr8 | 129064745 | 129066143 | 3.03 |
| chr8 | 129066475 | 129070064 | 6.39 |
| chr8 | 129070462 | 129071905 | 3.36 |
| chr8 | 129079989 | 129080873 | 2.35 |
| chr8 | 129084115 | 129085217 | 3.03 |
| chr8 | 129088503 | 129090401 | 3.36 |
| chr8 | 129092600 | 129094227 | 4.04 |
| chr8 | 129094739 | 129099031 | 3.7  |
| chr8 | 129100381 | 129102080 | 4.04 |
| chr8 | 129102511 | 129103659 | 5.05 |
| chr8 | 129109509 | 129110459 | 4.37 |
| chr8 | 129110848 | 129112270 | 3.7  |
| chr8 | 129113195 | 129114133 | 4.04 |
| chr8 | 129115857 | 129117896 | 4.71 |
| chr8 | 129120531 | 129125944 | 5.05 |
| chr8 | 129128792 | 129130055 | 5.38 |
| chr8 | 129132069 | 129134712 | 4.71 |
| chr8 | 129137390 | 129138182 | 2.69 |
| chr8 | 129138456 | 129143453 | 4.37 |
| chr8 | 129144460 | 129148078 | 3.7  |



|      |           |           |      |
|------|-----------|-----------|------|
| chr8 | 129148584 | 129150397 | 4.37 |
| chr8 | 129150936 | 129168249 | 6.73 |
| chr8 | 129168941 | 129170164 | 3.7  |
| chr8 | 129170568 | 129171453 | 3.36 |
| chr8 | 129172236 | 129173695 | 5.05 |
| chr8 | 129174566 | 129176453 | 4.04 |
| chr8 | 129176812 | 129178390 | 3.7  |
| chr8 | 129178757 | 129185706 | 6.05 |
| chr8 | 129187345 | 129193326 | 5.72 |
| chr8 | 129193700 | 129195372 | 4.71 |
| chr8 | 129196510 | 129198878 | 4.04 |
| chr8 | 129199625 | 129207227 | 4.71 |
| chr8 | 129208621 | 129216218 | 6.39 |
| chr8 | 129218127 | 129219760 | 3.7  |
| chr8 | 129221910 | 129223921 | 5.05 |
| chr8 | 129224324 | 129229189 | 4.37 |
| chr8 | 129230821 | 129235622 | 4.71 |
| chr8 | 129236674 | 129240346 | 4.04 |
| chr8 | 129241520 | 129242860 | 5.38 |
| chr8 | 129243600 | 129245507 | 4.04 |
| chr8 | 129245710 | 129250322 | 4.71 |
| chr8 | 129250805 | 129259952 | 5.72 |
| chr8 | 129262298 | 129268072 | 5.05 |
| chr8 | 129269671 | 129273756 | 5.38 |
| chr8 | 129275594 | 129277149 | 3.7  |
| chr8 | 129277409 | 129278298 | 4.71 |
| chr8 | 129281202 | 129286078 | 5.72 |
| chr8 | 129288230 | 129289762 | 3.36 |
| chr8 | 129296191 | 129297664 | 4.37 |
| chr8 | 129298534 | 129300329 | 3.7  |
| chr8 | 129303987 | 129306458 | 4.04 |
| chr8 | 129307649 | 129309992 | 5.05 |
| chr8 | 129314456 | 129317028 | 3.7  |
| chr8 | 129319017 | 129319855 | 4.04 |
| chr8 | 129320572 | 129322691 | 4.37 |
| chr8 | 129323616 | 129328293 | 4.71 |
| chr8 | 129328962 | 129340777 | 5.72 |
| chr8 | 129341469 | 129343756 | 3.7  |
| chr8 | 129344674 | 129349010 | 4.04 |
| chr8 | 129352339 | 129354246 | 4.04 |
| chr8 | 129354794 | 129356096 | 4.37 |
| chr8 | 129364332 | 129367474 | 4.37 |
| chr8 | 129367904 | 129369330 | 3.36 |

|      |           |           |      |
|------|-----------|-----------|------|
| chr8 | 129372630 | 129375168 | 4.37 |
| chr8 | 129377366 | 129379207 | 4.04 |
| chr8 | 129381258 | 129384468 | 6.05 |
| chr8 | 129384877 | 129386324 | 3.03 |
| chr8 | 129389810 | 129392222 | 5.38 |
| chr8 | 129392567 | 129395834 | 4.71 |
| chr8 | 129396831 | 129400158 | 4.71 |
| chr8 | 129401124 | 129403886 | 5.72 |
| chr8 | 129404107 | 129404897 | 4.37 |
| chr8 | 129405428 | 129409774 | 4.04 |
| chr8 | 129412299 | 129414351 | 3.36 |
| chr8 | 129416107 | 129419331 | 4.37 |
| chr8 | 129420747 | 129423879 | 4.04 |
| chr8 | 129424881 | 129425955 | 3.7  |
| chr8 | 129426527 | 129430242 | 5.05 |
| chr8 | 129433066 | 129436432 | 5.05 |
| chr8 | 129439485 | 129441514 | 6.73 |
| chr8 | 129443579 | 129446199 | 5.38 |
| chr8 | 129447519 | 129449449 | 4.71 |
| chr8 | 129454817 | 129455949 | 3.7  |
| chr8 | 129458068 | 129459613 | 4.37 |
| chr8 | 129459924 | 129461486 | 4.37 |
| chr8 | 129480740 | 129485144 | 6.73 |
| chr8 | 129487353 | 129488261 | 2.69 |
| chr8 | 129493845 | 129494752 | 3.03 |
| chr8 | 129500614 | 129502989 | 5.72 |
| chr8 | 129503942 | 129505175 | 4.37 |
| chr8 | 129505850 | 129506936 | 3.7  |
| chr8 | 129509126 | 129510187 | 3.36 |
| chr8 | 129515158 | 129516723 | 3.36 |
| chr8 | 129516959 | 129517819 | 4.04 |
| chr8 | 129521901 | 129523870 | 4.37 |
| chr8 | 129524442 | 129526420 | 3.7  |
| chr8 | 129528661 | 129529916 | 4.04 |
| chr8 | 129530276 | 129532656 | 4.37 |
| chr8 | 129533077 | 129534600 | 3.36 |
| chr8 | 129534917 | 129537019 | 4.37 |
| chr8 | 129537600 | 129538602 | 3.7  |
| chr8 | 129539727 | 129542331 | 4.37 |
| chr8 | 129543200 | 129545168 | 4.37 |
| chr8 | 129547464 | 129553584 | 4.04 |
| chr8 | 129555162 | 129555865 | 2.02 |
| chr8 | 129559144 | 129560549 | 3.7  |

|      |           |           |      |
|------|-----------|-----------|------|
| chr8 | 129566944 | 129568027 | 3.36 |
| chr8 | 129568509 | 129571236 | 4.37 |
| chr8 | 129573420 | 129575016 | 4.04 |
| chr8 | 129575602 | 129578678 | 4.71 |
| chr8 | 129579148 | 129580418 | 4.04 |
| chr8 | 129580935 | 129582313 | 4.04 |
| chr8 | 129582801 | 129584101 | 3.7  |
| chr8 | 129587953 | 129589536 | 4.04 |
| chr8 | 129595940 | 129597132 | 4.37 |
| chr8 | 129599878 | 129600965 | 3.03 |
| chr8 | 129604012 | 129605998 | 3.7  |
| chr8 | 129608349 | 129609688 | 4.37 |
| chr8 | 129611453 | 129613029 | 3.7  |
| chr8 | 129623167 | 129624261 | 2.35 |
| chr8 | 129632863 | 129635993 | 3.7  |
| chr8 | 129636230 | 129637829 | 3.7  |
| chr8 | 129643334 | 129644201 | 3.36 |
| chr8 | 129644951 | 129645923 | 4.04 |
| chr8 | 129648091 | 129653413 | 6.05 |
| chr8 | 129654096 | 129655479 | 4.37 |
| chr8 | 129656013 | 129657522 | 3.7  |
| chr8 | 129665038 | 129666412 | 4.04 |
| chr8 | 129670535 | 129672039 | 5.38 |
| chr8 | 129673440 | 129674464 | 4.04 |
| chr8 | 129674928 | 129675946 | 5.72 |
| chr8 | 129679271 | 129680637 | 4.04 |
| chr8 | 129684034 | 129685595 | 4.37 |
| chr8 | 129689774 | 129690979 | 4.37 |
| chr8 | 129698029 | 129698848 | 4.37 |
| chr8 | 129700949 | 129702077 | 3.7  |
| chr8 | 129705635 | 129706489 | 3.36 |
| chr8 | 129707239 | 129709346 | 3.7  |
| chr8 | 129714205 | 129716128 | 3.7  |
| chr8 | 129725614 | 129726787 | 3.7  |
| chr8 | 129732659 | 129733529 | 3.7  |
| chr8 | 129734842 | 129735963 | 3.7  |
| chr8 | 129740994 | 129741844 | 4.04 |
| chr8 | 129745383 | 129746650 | 2.35 |
| chr8 | 129747271 | 129748785 | 3.7  |
| chr8 | 129749092 | 129750013 | 3.36 |
| chr8 | 129755313 | 129756550 | 4.04 |
| chr8 | 129766675 | 129769032 | 4.37 |
| chr8 | 129770859 | 129772428 | 4.04 |

|      |           |           |      |
|------|-----------|-----------|------|
| chr8 | 129779597 | 129781540 | 4.37 |
| chr8 | 129784516 | 129786191 | 4.37 |
| chr8 | 129787258 | 129788496 | 2.69 |
| chr8 | 129790063 | 129791744 | 3.36 |
| chr8 | 129795653 | 129799705 | 5.05 |
| chr8 | 129804904 | 129805823 | 3.36 |
| chr8 | 129810362 | 129813368 | 6.05 |
| chr8 | 129819413 | 129833148 | 6.73 |
| chr8 | 129834322 | 129836209 | 4.37 |
| chr8 | 129842962 | 129844066 | 4.04 |
| chr8 | 129846149 | 129848011 | 3.7  |
| chr8 | 129850704 | 129851953 | 3.7  |
| chr8 | 129852616 | 129853824 | 4.04 |
| chr8 | 129854106 | 129858084 | 4.04 |
| chr8 | 129861572 | 129863242 | 4.04 |
| chr8 | 129870780 | 129873049 | 4.71 |
| chr8 | 129874386 | 129876193 | 3.7  |
| chr8 | 129877311 | 129878779 | 4.04 |
| chr8 | 129882164 | 129883028 | 2.35 |
| chr8 | 129888859 | 129889668 | 4.37 |
| chr8 | 129894080 | 129898356 | 4.37 |
| chr8 | 129902675 | 129903614 | 4.37 |
| chr8 | 130443787 | 130444928 | 4.04 |
| chr8 | 130754485 | 130756164 | 3.7  |
| chr8 | 130778938 | 130779866 | 4.04 |
| chr8 | 130807753 | 130808848 | 4.71 |
| chr8 | 130810298 | 130811576 | 5.05 |
| chr8 | 131044778 | 131046270 | 4.37 |
| chr8 | 131054019 | 131055379 | 4.04 |
| chr8 | 131718536 | 131720199 | 5.05 |
| chr8 | 132020871 | 132022315 | 7.06 |
| chr8 | 132837374 | 132838538 | 4.71 |
| chr8 | 132841509 | 132842580 | 4.04 |
| chr8 | 133162709 | 133164545 | 6.39 |
| chr8 | 133427489 | 133428397 | 3.03 |
| chr8 | 133737962 | 133738886 | 4.04 |
| chr8 | 134162542 | 134163452 | 1.68 |
| chr8 | 134309245 | 134310199 | 4.71 |
| chr8 | 134315721 | 134316735 | 3.7  |
| chr8 | 134379281 | 134380158 | 4.37 |
| chr8 | 134535731 | 134537741 | 4.71 |
| chr8 | 134736950 | 134738012 | 3.36 |
| chr8 | 134748169 | 134749006 | 3.03 |

|      |           |           |       |
|------|-----------|-----------|-------|
| chr8 | 134911422 | 134912528 | 3.7   |
| chr8 | 134954181 | 134955405 | 4.71  |
| chr8 | 135684548 | 135685652 | 10.43 |
| chr8 | 135724355 | 135725564 | 6.05  |
| chr8 | 135754389 | 135755283 | 2.02  |
| chr8 | 135755694 | 135756505 | 3.7   |
| chr8 | 135784834 | 135786305 | 3.03  |
| chr8 | 135859123 | 135860836 | 6.39  |
| chr8 | 137925140 | 137926511 | 6.05  |
| chr8 | 137930797 | 137931980 | 4.04  |
| chr8 | 139969032 | 139969893 | 3.36  |
| chr8 | 140112620 | 140113495 | 2.69  |
| chr8 | 140556789 | 140559668 | 6.05  |
| chr8 | 140703546 | 140704367 | 3.36  |
| chr8 | 140872607 | 140874052 | 9.75  |
| chr8 | 141326244 | 141327260 | 3.03  |
| chr8 | 141444892 | 141445744 | 1.68  |
| chr8 | 142011400 | 142012317 | 3.36  |
| chr8 | 142036339 | 142037615 | 5.38  |
| chr8 | 142067499 | 142068807 | 4.04  |
| chr8 | 142085308 | 142086776 | 4.37  |
| chr8 | 142163732 | 142164822 | 3.03  |
| chr8 | 142994205 | 142995499 | 5.05  |
| chr8 | 143004576 | 143005555 | 2.02  |
| chr8 | 143165056 | 143166262 | 4.04  |
| chr8 | 143391219 | 143392691 | 5.72  |
| chr8 | 143409247 | 143410678 | 9.08  |
| chr8 | 143450740 | 143452811 | 4.04  |
| chr8 | 143464378 | 143466092 | 4.04  |
| chr8 | 143502417 | 143503805 | 4.04  |
| chr8 | 143578076 | 143579179 | 2.02  |
| chr8 | 143724865 | 143729929 | 11.77 |
| chr8 | 143733592 | 143736651 | 5.38  |
| chr8 | 143753099 | 143754546 | 3.7   |
| chr8 | 143757426 | 143758075 | 4.71  |
| chr8 | 143758510 | 143759488 | 3.7   |
| chr8 | 143807422 | 143810372 | 4.37  |
| chr8 | 143883735 | 143884642 | 3.03  |
| chr8 | 143896834 | 143898268 | 4.37  |
| chr8 | 144043272 | 144045410 | 6.05  |
| chr8 | 144053708 | 144055745 | 9.08  |
| chr8 | 144069351 | 144070177 | 3.7   |
| chr8 | 144170681 | 144172129 | 4.71  |

|      |           |           |       |
|------|-----------|-----------|-------|
| chr8 | 144179847 | 144180906 | 3.36  |
| chr8 | 144182667 | 144184087 | 4.71  |
| chr8 | 144198173 | 144199519 | 4.37  |
| chr8 | 144224153 | 144225146 | 4.37  |
| chr8 | 144229102 | 144229907 | 4.04  |
| chr8 | 144232943 | 144234594 | 2.02  |
| chr8 | 144237632 | 144239019 | 4.37  |
| chr8 | 144249927 | 144251405 | 3.36  |
| chr8 | 144266440 | 144267292 | 2.69  |
| chr8 | 144450513 | 144451263 | 2.35  |
| chr8 | 144463810 | 144465335 | 3.7   |
| chr8 | 144489412 | 144490229 | 3.36  |
| chr8 | 144493430 | 144494245 | 3.36  |
| chr8 | 144495986 | 144498181 | 7.4   |
| chr8 | 144679964 | 144680957 | 3.36  |
| chr8 | 144729470 | 144737228 | 16.48 |
| chr8 | 144748881 | 144752211 | 12.45 |
| chr8 | 144766051 | 144767309 | 4.04  |
| chr8 | 144786207 | 144787376 | 3.7   |
| chr8 | 144788545 | 144792293 | 5.72  |
| chr8 | 144821014 | 144823122 | 5.72  |
| chr8 | 144852718 | 144854567 | 5.05  |
| chr8 | 144928309 | 144929240 | 4.04  |
| chr8 | 144930244 | 144931340 | 3.7   |
| chr8 | 144939986 | 144941489 | 8.75  |
| chr8 | 145010203 | 145011389 | 5.38  |
| chr8 | 145016492 | 145018143 | 3.7   |
| chr8 | 145030513 | 145031390 | 3.03  |
| chr8 | 145048547 | 145049715 | 4.37  |
| chr8 | 145049935 | 145051210 | 4.04  |
| chr8 | 145132739 | 145134025 | 3.7   |
| chr8 | 145158149 | 145159519 | 4.04  |
| chr8 | 145180155 | 145181233 | 4.37  |
| chr8 | 145225076 | 145225838 | 2.69  |
| chr8 | 145577718 | 145579125 | 3.7   |
| chr8 | 145580547 | 145581695 | 3.36  |
| chr8 | 145634056 | 145635561 | 4.37  |
| chr8 | 145703286 | 145704444 | 4.04  |
| chr8 | 145733800 | 145734934 | 4.04  |
| chr8 | 145740247 | 145741276 | 3.7   |
| chr8 | 145787672 | 145793025 | 8.41  |
| chr8 | 145838174 | 145839967 | 10.76 |
| chr8 | 145879613 | 145881569 | 6.39  |

|      |           |           |       |
|------|-----------|-----------|-------|
| chr8 | 145882513 | 145883686 | 3.36  |
| chr8 | 145888665 | 145893546 | 6.39  |
| chr8 | 145899215 | 145901200 | 4.37  |
| chr8 | 145909080 | 145910330 | 4.37  |
| chr8 | 145910814 | 145912268 | 4.37  |
| chr8 | 145913812 | 145914948 | 4.37  |
| chr8 | 145922772 | 145924461 | 3.7   |
| chr8 | 145924734 | 145928594 | 4.71  |
| chr8 | 145929871 | 145942181 | 10.43 |
| chr8 | 145942571 | 145944741 | 5.05  |
| chr8 | 145945318 | 145949506 | 6.05  |
| chr8 | 145998849 | 146000138 | 4.71  |
| chr8 | 146017112 | 146018340 | 3.7   |
| chr8 | 146053764 | 146057842 | 4.04  |
| chr8 | 146058448 | 146076238 | 24.22 |
| chr8 | 146076982 | 146082187 | 6.05  |
| chr8 | 146082781 | 146084014 | 4.71  |
| chr8 | 146088764 | 146091508 | 5.05  |
| chr8 | 146104029 | 146110521 | 9.75  |
| chr8 | 146114382 | 146116899 | 4.04  |
| chr8 | 146126261 | 146127940 | 6.05  |
| chr8 | 146135628 | 146138730 | 5.05  |
| chr8 | 146143407 | 146166829 | 19.17 |
| chr8 | 146167776 | 146169139 | 4.71  |
| chr8 | 146170263 | 146172166 | 3.7   |
| chr8 | 146190082 | 146192769 | 4.71  |
| chr8 | 146193213 | 146205573 | 17.15 |
| chr8 | 146205805 | 146211763 | 6.73  |
| chr8 | 146212035 | 146217089 | 4.37  |
| chr8 | 146217911 | 146219111 | 4.37  |
| chr8 | 146230643 | 146231977 | 5.72  |
| chr8 | 146251432 | 146252885 | 5.38  |

|          |              |              |             |              |            |                 |
|----------|--------------|--------------|-------------|--------------|------------|-----------------|
| C5ORF66  | ZSCAN30      | ZNF286B      | ZNF572      | LOC100507217 | SNX31      | MIR4648         |
| HIF3A    | ERV3-1       | SMARCC2      | ZNF573      | PIK3C2B      | USP30      | WIPI1           |
| NCBP1    | DYNLL1       | ZFP64        | C1orf106    | PCDHGC3      | ACOT7      | CMBL            |
| HSPA5    | DYNLL2       | ZCCHC10      | ZNF577      | IQCG         | USP32      | DLX4            |
| RNF13    | RAD9A        | PPAP2A       | ZNF578      | COL23A1      | SP6        | MON2            |
| FOXA1    | ERGIC1       | SUMO3        | RRM2B       | MUC17        | ZAN        | SMARCD2         |
| HIST1H4H | ZNF321P      | AP1M1        | NUP210      | REXO1L2P     | ADCY5      | SMARCD1         |
| TYW1B    | RBM4B        | SMIM6        | SETDB1      | RNU5E-1      | STMN3      | ABLIM2          |
| MPZL3    | MALRD1       | MOCS3        | IFRD1       | CNDP1        | TOR1AIP1   | ZNF880          |
| ARFRP1   | POLR3C       | CCDC146      | LUC7L2      | C14ORF37     | ADCY1      | GATA3           |
| CCDC129  | ZNF805       | LOC100505921 | CTSH        | COL15A1      | ZFYVE9     | F5              |
| ZNF791   | HSDL2        | CCDC149      | ERBB3       | GALNT10      | KIF25      | FAM172A         |
| SQLE     | CPPED1       | POLG         | ZNF205      | TC2N         | PHB        | SNAP25          |
| MIR6080  | UHRF1BP1     | DLG1         | ZNF200      | ZNF174       | ST20       | LINC00630       |
| C1ORF112 | CMC2         | GRAMD3       | SHC3        | ZNF175       | ADCY8      | LOC284395       |
| ZNF709   | CALM2        | SNORA72      | IDH2        | DDX43        | ADCY9      | LINC00637       |
| ZNF708   | CALM1        | DLG2         | IDH1        | MBTD1        | KIF23      | DUSP6           |
| ZNF879   | LINC00423    | DLG5         | FPR3        | LOC401320    | RSRC1      | LITAF           |
| NCBP2    | CACNA1B      | SAMD10       | RNF216P1    | LMLN         | SNHG7      | GRB14           |
| PIK3CB   | CACNA1C      | CDC73        | CTSE        | PTEN         | SNHG1      | ATF7IP2         |
| SLC28A1  | THRB         | TPM4         | SH3GLB2     | POP1         | PNPO       | C11orf49        |
| ZNF707   | CACNA1E      | COMMD1       | PPP1R37     | CEP70        | DLST       | SCNM1           |
| ZNF706   | FAM46C       | C11orf30     | RPL15       | ENC1         | RNF217     | PRR14           |
| RNF114   | DLGAP1       | PTGER2       | CTSZ        | ZNF778       | ZBTB21     | LACTB           |
| RNF115   | TUT1         | COMMD5       | KANSL3      | LOC652276    | ZBTB25     | CSRP1           |
| MIR554   | MBNL1        | METTL18      | RPL13       | ZNF776       | HHIPL1     | IPCEF1          |
| NET1     | ATP6V0D1     | LINC00323    | SETD3       | KLC1         | FAM208B    | PRR19           |
| KDM2A    | SYCP1        | ZNF585B      | SETD2       | KLC2         | DOCK2      | SUCLA2          |
| ZNF781   | MGC70870     | PTPN4        | FGFR2       | ZNF772       | GRIA3      | FAM102B         |
| SLC12A2  | WSB2         | LMBRD2       | MIR5694     | SNRK         | ADORA3     | ZNF630          |
| CBLB     | TRIM24       | C15ORF32     | SOS2        | LGR5         | SKAP1      | HMGN1           |
| ZNF45    | SLC25A2      | METTL15      | PCYT1A      | ZNF197       | ZNF75D     | XRRA1           |
| ZNF44    | LOC102724596 | B3GALT5      | INPP5B      | MMP16        | ARL13A     | MX2             |
| ZNF43    | PRMT7        | IGF1R        | NME7        | ZNF195       | DOCK4      | ATP6V1H         |
| GCC1     | CDH26        | SLC38A1      | DZIP3       | MIR548F1     | KLLN       | LOC100128398    |
| ZNF41    | LOC101927053 | RGMA         | SYK         | DSTYK        | CC2D1A     | MX1             |
| XPC      | SLC15A2      | PTDSS1       | NKAIN3      | LSM14B       | CDYL2      | PUM2            |
| SP2      | FAM84B       | PTGR1        | DSCAM-IT1   | FKBP3        |            | 4-Sep LOC646813 |
| CRB1     | LOC101927058 | SLC45A3      | SURF4       | UBE2D3       | FAM184A    | RAD1            |
| PPP2R2C  | PTPN18       | DMTF1        | OSGIN2      | PDS5B        | LOC1027233 | SFXN1           |
| FAM84A   | RBM45        | MIR7705      | LSM5        | CASC21       |            | 2-Sep CHL1      |
| OPA3     | GLG1         | OSBPL8       | VTCN1       | LOC101929655 | SLC9A4     | GABBR2          |
| OPA1     | PTPN13       | STK3         | B4GALT7     | ZNF219       | SMURF2     | SPAG17          |
| IREB2    | MIR152       | MACROD2      | RALGPS1     | TPK1         | SLC9A1     | SPTSSA          |
| CEP83    | MIR4515      | CEP112       | PRSS23      | BAZ2A        | SUPT7L     | SERPINE1        |
| RAB40B   | LOC101927459 | OSBPL2       | CHURC1-FNTB | TSTD2        | TNRC18     | SPTSSB          |
| MEG8     | NKAP         | TMEM184A     | ZNF37A      | RALYL        | SLC9A8     | PANK1           |



|            |              |              |              |              |            |              |
|------------|--------------|--------------|--------------|--------------|------------|--------------|
| TRAPPC9    | RP9P         | DEPDC1B      | GLDN         | PKHD1L1      | C8ORF44-SG | PANK3        |
| ZNF676     | GLT1D1       | RSU1         | ZNF483       | LMTK2        | SYT12      | VPS13B       |
| ZNF675     | LOC101927901 | R3HCC1L      | HELQ         | CYP11A1      | TFRC       | ETAA1        |
| ZNF674     | CMTR2        | LOC729683    | ZGPAT        | TANK         | ZNF669     | SOX13        |
| MYL12A     | LINC00663    | LINC01082    | ERF          | CHCHD4       | RBM33      | CCT5         |
| ZNF671     | NTSR2        | C7orf55      | HELZ         | KCNH6        | SYT15      | EPPK1        |
| AP5S1      | DNAJC22      | AKAP6        | LOC100506639 | LOC101928272 | PRPF6      | LINC00524    |
| PARP15     | HIF1A        | AKAP1        | PAIP1        | FBXO34       | ZFAS1      | LINC00520    |
| ERI2       | NTSR1        | SOX4         | RBAK         | APOH         | RBM38      | CALHM2       |
| GOLGA6L17  | LARGE        | GTF2F2       | KIAA0195     | FKBP9        | PLCB1      | LINC01036    |
| ZNF679     | LINC00938    | LZTS2        | RASSF5       | ZNF519       | HOXB1      | SNX33        |
| ZNF678     | ZNF853       | ZNF833P      | PCNXL4       | NF2          | MIR6760    | SNX32        |
| LOC441666  | ZNF852       | AKAP9        | NFE2L2       | NFIL3        | MYO9A      | LINC01033    |
| ANP32E     | ZFP90        | TEX2         | PDE4DIP      | ZNF510       | EPHB4      | LINC01031    |
| EYS        | ZNF850       | ZSCAN18      | NEAT1        | ZNF514       | DNAJC5B    | LINC01030    |
| SPPL2A     | ARHGAP5      | ARHGAP12     | AFF4         | ZNF221       | TOM1L1     | KMT2A        |
| MTX3       | CMIP         | LINC01317    | AFF3         | ZNF222       | SEC13      | ERVV-1       |
| ITGA9      | ZSCAN1       | CADPS2       | LOC101929412 | ZNF223       | EHBP1      | ERVV-2       |
| LOC1001295 | SUCO         | RAPGEF1      | PDPR         | ZNF224       | BTNL8      | ZFP28        |
| MYO3B      | LINC00936    | PHPT1        | PNPLA7       | ZNF225       | PCDHGA8    | FTX          |
| EVL        | THEM6        | PA2G4P4      | C15ORF59     | ZNF226       | ESPNP      | MC3R         |
| LOC1005057 | PPM1E        | INTS2        | NMB          | CCDC57       | TP53INP1   | LOC101927406 |
| HACL1      | PPM1D        | RRP1B        | NKAIN4       | FAM133B      | PAPD4      | ANHX         |
| LOC1005057 | SRSF1        | NUAK2        | NFE2L1       | CCDC59       | DTNBP1     | NFASC        |
| GTF3C2     | CHD1L        | CELF3        | GFOD2        | STX16        | LAMC2      | EIF2D        |
| DENND4A    | C4BPA        | CELF2        | KIAA0196     | KCNQ3        | PCDHGA3    | RAP1GDS1     |
| DENND4B    | TMOD3        | C3ORF20      | VGf          | KCNQ1        | PCDHGA1    | RPRD2        |
| IQSEC1     | PPM1L        | TANGO6       | UNC5A        | BLM          | PCDHGA6    | CDIP1        |
| PHLDA1     | SLC35B1      | FAM133DP     | TUBB3        | SLC39A9      | LOC1027238 | ARNT2        |
| DUSP22     | USP43        | KRR1         | LINC00592    | HOXC13       | PCDHGA4    | TNK2         |
| PHLDA3     | PPM1H        | C1orf21      | ATG14        | KRTAP10-11   | GPHN       | CIZ1         |
| XPO1       | RNF130       | GNPNAT1      | MAN2A1       | LINC01423    | LOC1027234 | ZNRF1        |
| MIR5093    | HSPA4        | TMEM132B     | MIR4505      | SAMD12       | ESR2       | LRR1         |
| CSDE1      | KIF7         | MIR5047      | FRMD6        | LINC01429    | CUX1       | ZDHHC7       |
| ZNF454     | TMEM71       | BMS1         | PSMB5        | C7orf26      | AAMDC      | MIR345       |
| BACH2      | ANXA13       | ZBTB40       | ABCA10       | LOC221946    | MRPS23     | FAM207A      |
| LOC1001321 | CA2          | AHSA2        | C21ORF91     | LOC102577426 | MRPS21     | ZC3H6        |
| ZNF37BP    | TMEM75       | H3F3B        | ABCA12       | PFN2         | ITSN1      | SLC22A5      |
| FBXL13     | PRKAB2       | RNF103-CHMP3 | ZNF133       | CNGA1        | MIR326     | PRDM6        |
| FBXL15     | LINC01090    | ARPC2        | FBXW11       | DNAJB12      | RPSAP58    | PRDM7        |
| HRH3       | TSHZ2        | GRM6         | DSCR8        | NAPSB        | OAZ3       | ANPEP        |
| TMEM260    | KCNQ2        | GRM7         | GNAS         | ZNF426       | PHF2       | LOC101927539 |
| HRH1       | SMEK2        | DPY19L4      | DSCR4        | LOC101928306 | PPP2R5C    | FLNA         |
| FBXL18     | MKLN1-AS     | NR1H3        | CDHR3        | ZNF350       | C12ORF56   | WDPCP        |
| KSR2       | MRC2         | TBC1D2B      | ST8SIA2      | ZNF398       | STPG2      | C8orf37      |
| FAM169B    | ZNF581       | ALPK3        | ST8SIA1      | FLOT2        | C2CD4D     | EFCAB3       |
| LARP6      | ZNF580       | MAPK1IP1L    | UBE2Z        | FBXO33       | SMIM14     | KRT18        |

|            |           |              |              |              |            |              |
|------------|-----------|--------------|--------------|--------------|------------|--------------|
| KCNIP1     | ZNF583    | ATP1A1       | NRROS        | EMC3         | ZFP1       | KLHL24       |
| SDK1       | C14ORF159 | RNF43        | DPF3         | ATXN7        | LAX1       | ABHD17B      |
| XPOT       | ZNF584    | SENP5        | PTGFR        | ZNF429       | TBX3       | DNMT1        |
| THSD4      | ZNF587    | LOC100631378 | SGK223       | ZNF836       | ZNF34      | KLHL20       |
| FAM212B    | ZNF586    | PPP1R3E      | SEC14L1      | C17orf67     | ZNF35      | NBPF8        |
| PPIG       | SCRN2     | PPARG        | SIX1         | SRGAP1       | ZNF32      | TLE3         |
| EPS15L1    | PTPN1     | CUX2         | ALS2CR12     | CDH13        | CTNND2     | CROT         |
| RBM12B     | ZFAT      | MAP3K9       | KRT7         | SRGAP3       | ZNF30      | FLJ42969     |
| HMCN2      | MRPL9     | PPARA        | LOC283335    | SMG8         | C9ORF84    | NAPEPLD      |
| C2ORF47    | ZNF611    | ING5         | SNED1        | SDR42E1      | ASTN2      | NBPF1        |
| TACR1      | ZNF610    | FLJ32255     | LOC100506023 | MBOAT2       | SH3GL1     | TAF13        |
| CHST6      | ZNF613    | BRF1         | HARS         | CDH12        | SH3GL3     | XIAP         |
| LOC1019296 | ZNF615    | FSIP2        | PWP1         | AKAP13       | ZNF668     | DDX42        |
| KCNH7      | ZNF614    | DCDC2        | ZNF383       | CCDC181      | SUV420H1   | LOC101927244 |
| KIAA1217   | ZNF616    | CENPBD1      | THSD7B       | FOXP2        | TMEM38B    | SLC26A9      |
| RPS6KA5    | ZNF619    | LOC283045    | PHTF2        | CCDC182      | ZNF530     | TRIM56       |
| PSMD14     | BANP      | ZNF823       | PHTF1        | LINC01515    | STRN3      | ZFP69B       |
| NOG        | SLC3A1    | CAMSAP2      | SRPRB        | GPRC5C       | ANKMY1     | COX5A        |
| ATAD1      | PSD       | DNAJC5       | LOC148709    | CCDC186      | ZHX2       | MIR6785      |
| KCNH8      | LRCH1     | CAMSAP1      | ESRP2        | NEURL1B      | ZHX3       | CROCCP2      |
| TOP1       | VAT1L     | DNAJC1       | ZNF33BP1     | NEDD9        | GOLGA2P10  | TM9SF4       |
| ATAD2      | FSTL4     | ERMP1        | MTG2         | SCLT1        | ZHX1       | SAP30BP      |
| FTCD       | BAG3      | CTAGE10P     | TMCC1        | UNC79        | PYGB       | PCDHB15      |
| TMEM198B   | AGBL5     | BHLHE40      | GSDMC        | BIRC8        | OPTC       | PSMD4        |
| RTFDC1     | AGBL1     | CD14         | RAB22A       | LOC100506499 | SPAM1      | PCDHB18      |
| LOC1019287 | YBEY      | ZNF701       | TSEN2        | N6AMT2       | DDX55      | TPRA1        |
| FAM134B    | HAVCR1P1  | TTC34        | LINC00111    | GARNL3       | LOC1001330 | BEND6        |
| ZNF292     | MSRB2     | GOSR2        | NMNAT2       | CDH18        | MIR6165    | LAMA5        |
| ZNF7       | C15orf39  | LOC728485    | LFNG         | BRWD1        | PUS10      | PSMC6        |
| METTL2A    | PTK2      | EFHB         | LOC101926941 | SLCO4A1      | ERN1       | OSGIN1       |
| ZNF700     | PLCE1     | LINC00359    | ZIM2         | AREL1        | RPS26      | RXRA         |
| TRERF1     | ADAMTS17  | RRP15        | ZNF587B      | FBXO31       | ZNF248     | CDK18        |
| SMAD5      | ARRB1     | CEP85L       | PPCDC        | LONRF2       | ITPRIPL2   | TAF4         |
| SMAD6      | ADAMTS19  | ACP6         | EPB41L2      | C15orf27     | RPS20      | ATP6V0D2     |
| GOLPH3L    | VDAC1     | CCDC97       | LOC102724163 | JARID2       | RPS21      | UBE2V1       |
| SMAD1      | NTRK3     | MRPL40       | UBE2H        | PGK1         | CCDC33     | ZNF732       |
| SMAD3      | CD79B     | ACP2         | ACSS3        | B3GALT1      | ANKRD33B   | TAF1B        |
| MUS81      | HMCN1     | SLC2A13      | ACSS1        | LOC100288798 | CCDC36     | ZNF730       |
| NPHP1      | LOC553103 | RAP1B        | RABEPK       | TMSB10       | MIR3687-1  | WDR61        |
| NDUF6F6    | DENND3    | SLC2A10      | TFF1         | LOC101927811 | PTBP3      | ZNF736       |
| NDUF6F2    | DEF6      | ZNF831       | SALL4        | FBXO32       | MTERF4     | ZNF737       |
| ZNF704     | CBLN4     | ANKRD35      | VPS4A        | KIAA1598     | UGT1A10    | POC1B-GALNT4 |
| MIR4713    | SF3B4     | DYRK3        | ADAM22       | ARID5B       | MVB12B     | ZNF883       |
| MIR4712    | GMFB      | MKRN2        | GMEB2        | BMPR1A       | PAWR       | ZNF738       |
| LOC440311  | TOMM20L   | ANKRD32      | BCL11B       | NTN1         | ZNF354C    | GPR158       |
| LINC01107  | BNIP1     | C1ORF158     | PRKRIP1      | MICALL2      | CHSY1      | ATP6V1E1     |
| NT5DC1     | ARPP19    | LINC00917    | IL19         | NAA30        | RAD51B     | SLC37A1      |

|            |              |           |              |              |            |           |
|------------|--------------|-----------|--------------|--------------|------------|-----------|
| ARF1       | PSMA7        | GADD45G   | HDGF         | LINC01350    | SIKE1      | LINC00862 |
| SNTB1      | PSMA5        | PCBP2     | LOC101927495 | BANF1        | CSNK1A1    | ABCA6     |
| ARF6       | OCLN         | UBE2Q1    | LOC101927497 | RNVU1-8      | TFAP4      | KRTCAP3   |
| LOC1019290 | SLC6A11      | LHFPL3    | GSTM3        | RPS10P7      | PRRT3      | ABCA5     |
| CRBN       | SLC6A17      | ITPR1     | LRRN2        | LINC01194    | RARRES1    | TRERNA1   |
| LOC400558  | C6           | FAM91A1   | IL16         | ATAD2B       | LOC1024672 | RADIL     |
| ELMSAN1    | KIF16B       | FLJ10038  | LINC00578    | LINC01197    | ZNF404     | TMEM170A  |
| ERICH6     | NEMF         | TMEM19    | CNTNAP2      | IL23R        | MIR5095    | ZNF493    |
| ERICH5     | GALNTL6      | NT5C3A    | LINC01331    | PLCG1        | COL21A1    | STXBP3    |
| ZIK1       | KIAA1324     | SLC22A25  | ODF1         | LOC727751    | SLC35D2    | TUBGCP3   |
| TUG1       | ZNF320       | NR2F2     | LOC101927124 | B4GALNT2     | GATAD2A    | CCBL1     |
| MIR3620    | FBXO43       | ARL8B     | LOC101927123 | LAPTM4B      | CCDC85C    | NBEAL1    |
| DBNDD1     | ZNF322       | LINC00924 | UBE2B        | ANKH         | CCDC85B    | NBEAL2    |
| MYEOV      | FAM214A      | LIMD2     | SNORA43      | LOC101927780 | PPIA       | ABCA9     |
| IL5RA      | LOC101927845 | RNF150    | LOC647323    | ARL8A        | SARS       | CAPS2     |
| TCEA2      | ZNF329       | ANKRD28   | AAGAB        | MIR301A      | SPDEF      | GCH1      |
| CALB1      | SORD         | KIF21A    | BIRC7        | ZNF813       | LOC1005059 | EPS8      |
| NACAP1     | C1orf56      | RIMS2     | LOC102724467 | WDR87        | C20orf195  | C2CD2L    |
| COX4I1     | GUCD1        | MST1P2    | HOXC13-AS    | TTC7B        | IL1RAPL2   | IGSF5     |
| SH2B2      | ATXN10       | ZNF83     | EIF5         | MAN2C1       | DIP2B      | PSMD7     |
| PRKAR1A    | RMND5B       | ZNF81     | HIST2H2BC    | WDR89        | DIP2C      | DDX46     |
| PRKAR1B    | MYL12B       | TMEM65    | OXR1         | PGF          | EBAG9      | PSMD1     |
| C19orf18   | SNORD12      | ZNF85     | RUNX1T1      | ACER3        | NGFR       | IGSF3     |
| LINC00674  | EIF2AK1      | SUGCT     | LINC00970    | TRIM25       | SLCO3A1    | ANKRD46   |
| MOB4       | EIF2AK4      | TMEM64    | CMAHP        | ZNF559       | DNAJC2     | SGMS2     |
| SRPK2      | LOC101928736 | LOC643711 | GNN          | TMEM212      | MOXD1      | BAALC     |
| BDKRB2     | UBE2G2       | SLC27A2   | SPTBN2       | PDE1C        | FAM19A2    | CPSF6     |
| PFKP       | AGPAT3       | CYP2C9    | FLJ26850     | PDE1A        | MID2       | ZNF14     |
| FAM20A     | BAGE         | IL2RA     | LOC100289333 | SSUH2        | DCLRE1C    | VAV3      |
| ADARB2     | KIAA1211     | ERO1L     | KLF10        | ATP13A4      | YES1       | ZNF16     |
| CCDC113    | MYO10        | ZFYVE20   | TFAP2A       | ESYT2        | THUMPD3    | ZNF17     |
| ADARB1     | DRG2         | ACPP      | TFAP2C       | ZNF816       | KYNU       | ZNF10     |
| LEO1       | CEMIP        | TPCN1     | PCDHGA10     | RAI1         | WASF1      | MYOF      |
| LOC340512  | MCM3AP       | IL21R     | PCDHGA11     | LOC284344    | FAM171B    | ZNF12     |
| LINC01213  | ATG101       | SPAG16    | PCDHGA12     | COL28A1      | WASF3      | ANKRD40   |
| METTL25    | CMYA5        | GEMIN5    | DPP8         | CXCR5        | CFAP44     | EPS15     |
| ZNF3       | LOC101929196 | C16orf58  | GBE1         | CXCR4        | NPAS4      | PPFIA2    |
| MYL6B      | ZNF876P      | CDK5RAP3  | CENPF        | ANKRD11      | NPAS3      | PPFIA3    |
| MGRN1      | KIAA1524     | C20orf197 | DPP3         | IVNS1ABP     | NPAS2      | RASGRP3   |
| CTHRC1     | NIP7         | CDK5RAP1  | DPP4         | NUP210P1     | RNU6ATAC   | MAD1L1    |
| LOC284581  | PEX13        | PRKD1     | DPP6         | APPBP2       | LOC1019291 | PLEKHG4B  |
| LOC1019276 | PSMD12       | CHMP4C    | SLC44A1      | TLDC1        | WDR36      | MYBPHL    |
| CUEDC1     | ALDH1A3      | WRNIP1    | SLC44A2      | MEF2D        | COPG2      | HINT3     |
| C2CD2      | AP3B1        | CCDC7     | SNORD115-3   | COA1         | HNRNPA2B1  | TM4SF4    |
| CPEB4      | SEL1L2       | ERG       | ZBTB7B       | SLC38A8      | PHOSPHO1   | MAB21L3   |
| EEF1A2     | GCNT7        | BHMT2     | TPST1        | KDM3B        | NBAS       | LOC440704 |
| CPEB1      | AP3B2        | CBLL1     | ANXA9        | DCSTAMP      | ZCCHC6     | WNK2      |

|           |              |              |              |               |            |              |
|-----------|--------------|--------------|--------------|---------------|------------|--------------|
| NADSYN1   | GCNT1        | ZNF491       | MSI2         | MIR645        | PDZK1      | CNOT8        |
| RAB2A     | NAP1L1       | ZNF490       | LOC100507501 | TTBK1         | ZNF663P    | CPSF1        |
| SRBD1     | CALCOCO2     | NAA20        | MCM7         | CCDC174       | TRIP11     | ZNF649       |
| ABAT      | AMHR2        | NOXRED1      | PCNP         | LOC255654     | LOC1005066 | DYNLRB2      |
| ZNF780A   | PARPBP       | PRR15L       | ZDHHC20      | MIR643        | SPOP       | CNOT2        |
| ZNF780B   | C14orf132    | COBLL1       | PCNX         | DMXL2         | KIAA0247   | SIPA1L3      |
| TLN2      | CATSPER3     | DCAF13       | ZDHHC22      | E2F6          | TBL1X      | HSD17B3      |
| NFX1      | RGS6         | CDK19        | LCA5L        | ARSG          | OSR2       | HSD17B4      |
| WDR45B    | RGS7         | GFI1B        | SQSTM1       | EXOC6         | AP4E1      | CNOT6        |
| MIR4532   | SLC16A10     | ERBB4        | GRHL2        | EXOC5         | LOC441455  | KCP          |
| TP53TG1   | LPCAT1       | ZNF121       | PCAT6        | HEXA          | PPP6R1     | TTLL5        |
| DPYS      | SCAND2P      | LPIN1        | PCP4         | ZNFX1         | ZNF2       | MIR5188      |
| CLIP2     | LOC100133669 | CDK10        | RPA3         | HEXB          | TMBIM4     | ITGB2        |
| YLPM1     | RGS9         | FMO5         | ANKFN1       | LOC101927967  | IPPK       | ITGB5        |
| POU5F1B   | EYA2         | LOC101928137 | TENC1        | SHISA9        | ZNF804B    | LTBP2        |
| ETNK2     | MIR548W      | SULF2        | HSPB11       | COX16         | PCDHA2     | LTBP1        |
| CDCA4     | NFKBIA       | GJB7         | GSTCD        | MGAT4C        | CASP7      | ITGB8        |
| HOMER2    | MIR548Q      | GPR126       | RINT1        | PPP1R13L      | ARID3B     | KPNB1        |
| ISM1      | LOXL1        | KLF6         | SECISBP2     | FUT9          | MLKL       | SCN8A        |
| DHRS7B    | PIEZO2       | NEO1         | PRPF18       | FUT8          | LINC01170  | RTN1         |
| C14orf2   | PIEZO1       | MIR548AI     | COQ4         | ZDBF2         | BCL9       | LOC101928295 |
| LINC01476 | PIGK         | MTRNR2L3     | LOC728730    | LINC00959     | CFDP1      | ZNF124       |
| SP4       | PIGL         | RBM22        | CRIM1        | GHR           | C14orf142  | ACTR6        |
| CD47      | ZNF891       | CBX1         | BLZF1        | EVA1A         | HECTD2     | LOC729296    |
| CA14      | MIR548G      | N4BP1        | JAGN1        | RAD18         | YWHAQ      | MIR548AZ     |
| PRICKLE2  | C9ORF153     | MIR548AC     | APCDD1L      | LINS          | HECTD4     | LCP1         |
| RSF1      | EMC2         | N4BP3        | USH2A        | ZNF334        | UBE2QL1    | LOC220729    |
| CA10      | MIR548N      | HECW1        | ZNF75A       | GDF6          | NPEPL1     | COPS7B       |
| ATG4B     | KIAA1143     | HEATR6       | NRCAM        | NUDCD1        | SETD1A     | IPO4         |
| POGK      | CATSPERB     | HEATR4       | ISL2         | USP29         | AKT1       | LPIN3        |
| POLR3GL   | TAX1BP1      | HEATR2       | MRGBP        | LOC100128233  | LYRM1      | CERS2        |
| EIF1AD    | SRCAP        | RGS22        | MCF2L2       | CXCL13        | D2HGDH     | AKR1C8P      |
| ZNF48     | MINPP1       | ZNF304       | PCDHGB3      | FBLN5         | SPG7       | BACE2        |
| RAB21     | RHPN1        | MIR548A2     | PCDHGB2      | ZNF333        | LOC146880  | BTBD6        |
| NIPAL2    | LINC01278    | SLC24A3      | PCDHGB1      | ADAMTS7       | LRFN5      | MGC39584     |
| CLK3      | CSNK1G3      | ZNF300       | PCDHGB7      | LOC648987     | WBP4       | NCK1         |
| THAP4     | CCDC170      | SFSWAP       | PCDHGB6      | ZNF239        | S100A11    | IER5         |
| THAP5     | SRRM2        | ZNF208       | ATP9A        | ADAMTS2       | GPR75-ASB3 | ZKSCAN2      |
| CFH       | LINC01271    | MIR4533      | ZNF300P1     | NDUFC2-KCTD14 | LOC1005075 | MYO6         |
| THAP9     | CCDC175      | MEX3B        | MROH7        | CCSER1        | S100A16    | SPIRE2       |
| ANKFY1    | LINC01273    | DEDD         | ZNF141       | ADAMTS9       | LINC00620  | MBD5         |
| PXDNL     | C9orf116     | PHF21A       | DENND2C      | COTL1         | TRMT12     | TMEM41A      |
| CDKAL1    | PDK2         | ZC3H13       | ABCA11P      | OSBPL7        | CACNA2D1   | CMTM8        |
| SYBU      | KANK2        | ZNF137P      | ZNF142       | TSPEAR        | LINC00624  | RABGGTA      |
| WDR70     | RDH12        | PPP1R35      | LOC101928443 | MKLN1         | PKD1L2     | FAM228B      |
| WDR73     | KANK1        | LOC100422737 | ZNF146       | CDH3          | PKD1L3     | KDM7A        |
| IGDCC3    | LNPEP        | ZNF544       | LOC283575    | IL36B         | GRK6       | ZNF391       |

|            |              |              |            |              |            |              |
|------------|--------------|--------------|------------|--------------|------------|--------------|
| WDR74      | ATXN1        | ZNF547       | CCDC88C    | CDH4         | GRK4       | ZNF460       |
| ZNF724P    | FAM178B      | ZNF546       | INPP4B     | DPY19L1P1    | LOC285593  | ZNF461       |
| AAAS       | COL6A6       | ZNF540       | INPP4A     | LINC00824    | TDP1       | ZNF394       |
| PCK1       | TBC1D31      | ZNF543       | GSE1       | CENPN        | CAPN7      | PSKH2        |
| LOC1019277 | TM2D3        | SLC1A5       | ZNF782     | HPCAL1       | CAPN5      | ZNF397       |
| SYTL2      | MTBP         | SLC1A6       | LOC153684  | RAB5A        | 14-Sep     | AVPR1A       |
| PABPC1     | ZFAND6       | ZNF549       | PHC3       | NPTX2        | MYC        | IL1RL2       |
| UVRAG      | FAM71D       | ZNF548       | SUSD1      | HSPB1        | NECAB2     | MGC32805     |
| NUF2       | MAFK         | SLC1A2       | LYN        | STRA6        | NECAB1     | ZFPM2        |
| PPP2R3A    | FBP1         | TCAIM        | ZNF788     | REV3L        | AURKA      | GNPAT        |
| SIDT1      | AMN1         | PPP1R15B     | RNF126P1   | SSH3         | ZNF847P    | HCN4         |
| NQO1       | PHKB         | IMMP2L       | WHAMM      | TMEM229B     | COG8       | SULF1        |
| SFMBT2     | PLIN1        | LRRC42       | C20orf27   | LINC00636    | SPAG9      | SLC25A19     |
| C16orf95   | LOC100507412 | LRRC49       | VWA9       | CENPT        | FRA10AC1   | COIL         |
| CDC42SE1   | CEP128       | ZNF702P      | MIR5087    | PAFAH1B3     | COG5       | C2orf88      |
| PRPF3      | MIR4513      | LINC01411    | LSG1       | RNF19A       | SPAG1      | LLGL2        |
| LINC00992  | SLC39A11     | C2ORF69      | MGMT       | SLC41A1      | HTR7       | KIAA1429     |
| ASB2       | PPP2R3C      | EIF3H        | PMS2       | C10orf126    | IGHMBP2    | RASAL2       |
| ASB3       | MIR4514      | RARB         | BRINP3     | SLC41A3      | RAE1       | SLC25A12     |
| TMBIM6     | NPDC1        | RARG         | BRINP2     | GH2          | SNAPC5     | HECTD1       |
| ASB7       | NTRK2        | EHHADH       | RASEF      | CNBP         | TRMT1L     | SMAGP        |
| NAB2       | RSBN1        | LOC100507065 | OTUD6B     | ATP5G1       | DIO2       | TMEM55A      |
| SIX5       | SLC34A1      | FNBP4        | SNRPA1     | SCARB1       | NFAT5      | CFAP61       |
| PLEKHH2    | ZSCAN29      | CLIP1        | ROBO1      | UCKL1        | ZNF132     | EPX          |
| MUC12      | PTP4A2       | MAN1A1       | ZNF335     | LOC102723354 | KRTAP10-9  | ATP5J2-PTCD1 |
| C7ORF55    | CREBRF       | SETD5        | HPS3       | DBF4         | SLC4A7     | USP3         |
| LOC1005065 | ZSCAN25      | ATP5S        | H2AFX      | PLEKHA6      | GSK3B      | ROPN1L       |
| ESRP1      | AMDHD2       | SKA2         | PKIA       | PLEKHA7      | LINC00535  | FAIM3        |
| CNPY4      | ZSCAN20      | PWWP2B       | PKIB       | C16orf92     | CCDC83     | ZNF264       |
| C7ORF50    | ZSCAN22      | GMPR         | CCDC84     | MRPL46       | LINC00536  | SLC12A4      |
| ZFP69      | CD8A         | TEX22        | TLR2       | C16orf91     | EXD3       | ZNF266       |
| LOC1019275 | MLYCD        | RABIF        | DDX5       | MEF2A        | EXD2       | ZNF267       |
| ANKRD30BL  | TDRD9        | WWP1         | DDX6       | TRIP4        | LOC1019271 | ZNF260       |
| ZFP62      | TDRD3        | MTMR4        | FAM179B    | MRPL48       | TRIM59     | CCDC12       |
| ATG7       | VPS45        | NOL11        | ZNF569     | WNT7A        | STC2       | ZNF263       |
| CRISPLD2   | RIIAD1       | MYT1         | ZNF568     | ZNF699       | LINC01006  | SPIN1        |
| MRPL30     | VAPB         | CCNL1        | GRIP1      | ERAP1        | RNF40      | SLC12A8      |
| PTRH2      | MIR3175      | JAKMIP1      | ZNF566     | STARD13      | HIRIP3     | IMP3         |
| RGS3       | ABHD2        | SMG7         | C1orf116   | UBE2E1       | ANKRD52    | MIR320B1     |
| PTH2R      | UBR2         | LOC101929089 | LINCR-0002 | PEAK1        | LOC1027244 | HSP90AB1     |
| C3orf70    | UBR7         | EPHA3        | SLC19A2    | EMR3         | ZNF837     | EXT1         |
| UFSP1      | PA2G4        | TSC22D2      | ZNF562     | ZNF695       | POU2F1     | RNU5D-1      |
| FAM92B     | UBR5         | C9ORF171     | ZNF561     | SEC63        | MAMDC4     | KIAA0226L    |
| ARRDC1     | BMP7         | PSRC1        | ZNF560     | MALAT1       | FSBP       | LPP          |
| ZFP82      | BMP6         | BAZ1A        | CCDC64     | CNTN1        | ST3GAL1    | LPO          |
| PDE8A      | BMP5         | CCDC150      | NCAPG2     | HDC          | MIR548H4   | TMEM222      |
| SYPL1      | GIN1         | SNAI3        | ZNF211     | TRIB1        | ZNF839     | TNFRSF21     |

|            |              |        |                |              |           |            |              |
|------------|--------------|--------|----------------|--------------|-----------|------------|--------------|
| LOC653602  | ACYP2        |        | CCDC158        | CCDC60       | CNTN4     | SPRYD3     | APOL6        |
| LOC643623  | MBTPS1       |        | SNAI1          | C10ORF107    | ARFGAP1   | FAXDC2     | PLA2G4C      |
| SH3BP5     | CCNY         |        | SNORD127       | DPY19L1      | LAMB1     | MANEA      | TESK2        |
| RFX4       | TERF2        |        | TUFT1          | SYS1-DBNDD2  | CRADD     | URAFP      | LOC100506747 |
| RFX5       | C8ORF88      |        | RPUSD3         | SVOPL        | NEK6      | KLHDC2     | ZNF841       |
| RFX7       | CCNC         |        | LOC100505938   | DCLK1        | NEK7      | PTGFRN     | LINC01151    |
| NRXN3      | C8ORF87      |        | OSBPL10        | PRC1         | ZNF169    | LOC1019271 | TSEN15       |
| CSAD       | CCNJ         |        | LINC01525      | ZNF845       | NEK5      | KBTBD4     | ADCY3        |
| ZNF846     | VPS72        |        | PTGES3         | NFKBIZ       | KMT2E     | KBTBD2     | PSMC5        |
| ELK4       |              | 11-Mar | SYT1           | LRRC69       | HRNR      | MIR4325    | GNG4         |
| TMEM44     |              | 10-Mar | SYT2           | NOX5         | U2AF1     | PHYH       | LINC01482    |
| LOC1001302 | PRKCH        |        | FA2H           | RABGAP1L     | ZNF160    | HDDC3      | LINC01483    |
| PAK1       | TRIM33       |        | SYT6           | CLTC         | B3GNTL1   | LANCL2     | VIT          |
| PAK2       | RASSF3       |        | SYT7           | CLTB         | ZNF165    | PCTP       | LIMA1        |
| HAAO       | FKTN         |        | UBTD2          | ARID4A       | NEK9      | HTR2A      | LOC100288866 |
| RECQL5     | TRIM37       |        | PLAGL2         | DNAAF2       | PRR11     | PCBP3      | YIPF2        |
| RECQL4     | HOXC4        |        | PLAGL1         | TMEM116      | FAM129A   | GFRA1      | DDAH1        |
| ZNF177     | LOC283692    |        | MESDC1         | TMEM117      | CDC42BPA  | LINC00910  | CYB5R4       |
| TIGD7      | NHP2         |        | NFATC2         | LOC101928069 | CDC42BPB  | RNF224     | SNX5         |
| MSL2       | NCKAP5       |        | NFATC4         | KRT8         | FAM129B   | TECPR2     | ALDH3B2      |
| ZNF57      | THAP11       |        | LOC644189      | PLAC4        | ZNF765    | ZBTB37     | ALG3         |
| FALEC      | FAM200A      |        | METRNL         | UBE3A        | ZNF766    | DDX1       | RBBP6        |
| KCNG1      | TERC         |        | COLQ           | MRPL41       | ZNF761    | KLHL36     | LINC00665    |
| KCNG2      | IL1R1        |        | TBC1D3P1-DHX4  | UBE3D        | ZNF763    | TMEM170B   | MIR4471      |
| LOC284837  | NFS1         |        | RAI14          | MED12L       | TXNRD1    | RAB7A      | SLC29A3      |
| ZNHIT1     | JMY          |        | VANGL1         | GRB2         | ZNF184    | KLHL35     | RBBP5        |
| NUBPL      | LRRK1        |        | MTDH           | PRSS36       | ZNF180    | SPATA17    | LINC00664    |
| NME1       | CHD6         |        | EXOSC4         | SSR4P1       | STAG1     | DKKL1      | RNGTT        |
| YTHDF3     | CHD9         |        | LOC100507477   | UBXN4        | ZNF182    | SIRT5      | FUK          |
| YTHDF1     | MIR634       |        | ADAMTSL3       | PRSS38       | ZNF189    | PVT1       | ITGB4        |
| ZNF596     | ABHD12       |        | MADD           | DRAM1        | UBE2E2    | MED30      | MIR4674      |
| ZNF597     | ZNF585A      |        | TMEM167B       | EDN3         | ZNF25     | NUCKS1     | S100A10      |
| ZNF594     | SUPT16H      |        | ST20-MTHFS     | FLG2         | CCDC3     | ZNF567     | ARIH1        |
| ZNF595     | SPO11        |        | LOC101927822   | FAM219B      | MIR4736   | LINC00847  | YPEL3        |
| FLJ41278   | TMEM245      |        | DISC1          | FAF2         | ZNF20     | RNA45S5    | YPEL2        |
| ZNF599     | LOC101927932 |        | LINC01322      | ZSCAN2       | ZNF23     | PLEC       | CCNE2        |
| CEP95      | IL22RA2      |        | COA4           | LMX1B        | HYKK      | LINC00842  | HAR1B        |
| ZNF600     | FN3K         |        | BLACAT1        | SLC26A5      | SHH       | SEZ6L2     | HAR1A        |
| ZNF606     | TSC1         |        | RRBP1          | SLC26A7      | LOC400867 | ZNF227     | TIMELESS     |
| ZNF607     | MFSD3        |        | ANGPT1         | FGF7         | ZNF28     | C10ORF11   | TREML3P      |
| ZNF605     | MRPL10       |        | PPP1R14C       | MTFR1        | PLA2G16   | ZNF564     | MKL2         |
| CBX3       | MRPL11       |        | KPNA2          | COL6A4P1     | CSRP2     | CXXC5      | SREK1        |
| ZNF609     | MRPL13       |        | PRSS22         | GET4         | DNAH6     | PEX7       | RAB11A       |
| AXDND1     | RAB3GAP2     |        | ENG            | ACTB         | MAPK8IP1  | MGAT1      | DERL1        |
| PLCH1      | IL4R         |        | C9orf43        | CMSS1        | DNAH5     | ZNF563     | SRMS         |
| VEZF1      | MRPL16       |        | GTF2IRD1       | SLC25A40     | HS6ST1    | NWD1       | C8ORF34      |
| POP7       | RAB3GAP1     |        | TNFAIP8L2-SCN1 | LINC01503    | HS6ST2    | LAD1       | PRR29        |

|           |           |                |           |              |           |               |
|-----------|-----------|----------------|-----------|--------------|-----------|---------------|
| PPP1R9B   | TANC1     | F12            | SLC25A45  | ZNF501       | RBM25     | CDK14         |
| KIF14     | ATP8B4    | C3ORF14        | SDC2      | ZNF502       | C9ORF3    | LMBR1         |
| TARS2     | TTC9      | EXOG           | VAV2      | ZNF506       | SPOCK1    | PKM           |
| CEP72     | MFSD4     | MIR3193        | SDC4      | TMEM131      | HECW2     | ITPK1         |
| NUDT3     | TMPRSS13  | ZNF382         | PRPH      | LOC440461    | SLC19A1   | ZNF844        |
| PMEP1A    | LINC00928 | FZD6           | STRADA    | TMEM134      | RBM28     | CSK           |
| LOC101929 | CIB1      | LINGO1         | NUP153    | CCDC47       | FNBP1     | SNORA70G      |
| LOC339166 | ITPR2     | TBC1D30        | ECI1      | LOC101929224 | RFWD2     | CNOT11        |
| C14orf80  | WFDC3     | CACNB3         | ESD       | ZNF235       | ACE       | PPDPF         |
| PHLDB1    | ZNF829    | TBC1D32        | STON2     | ZNF234       | ACD       | MLLT10        |
| LRR37A11F | LINC00927 | LINC00693      | FAM105A   | ZNF233       | EPHA7     | ZNF302        |
| STK32C    | ANKRD29   | PCDH15         | BAIAP2    | ZNF232       | EPHA6     | DAP3          |
| STK32B    | LINC00925 | VPS51          | ZNF592    | ZNF230       | MIR1256   | EIF4H         |
| ZSWIM6    | ABCG1     | RTEL1-TNFRSF6E | RNU6-2    | GPBP1        | C6ORF165  | SMYD3         |
| SMEK1     | ABCG2     | RALA           | CLUAP1    | HMGNA4       | ME3       | BFSP1         |
| PPP5C     | PRDM15    | VPS54          | LINC01298 | CDKL3        | TENM4     | BCAR1         |
| DHX40     | DEPTOR    | ZNF627         | SORCS2    | SPRY4        | LSMEM1    | NTNG1         |
| CALML5    | TLK2      | LOC101927557   | DMRT2     | SAMD4A       | ZNF229    | MIR4792       |
| GAS8      | MPO       | SCYL3          | RHOD      | SAMD4B       | VASP      | PAAF1         |
| CIPC      | FIS1      | GPR149         | FYTTD1    | MIR646HG     | ATP5E     | CEP170        |
| NXPH3     | USP50     | STXBP4         | MIR6773   | GAS2L3       | TBC1D8    | RNASEH2B      |
| ZNF117    | TMEM68    | SMPD2          | CCAT1     | LOC100128885 | KATNBL1   | CD96          |
| ZNF114    | MTSS1     | BRIP1          | LRR37A11F | ABHD17C      | TBK1      | LINC01021     |
| KDM3A     | CASKIN2   | ZNF623         | HYDIN     | TMEM63B      | ZNF740    | LINC01023     |
| ZNF112    | FLJ46284  | INF2           | CNR2      | CDKL1        | MRPS31    | ISY1          |
| ISLR2     | AIFM1     | ZFPM1          | FOXP4     | LOC100499484 | TBC1D5    | LOC101927746  |
| GAS7      | IL17RC    | PRKXP1         | MIR4790   | BAGE2        | ZNF749    | CLK4          |
| NUTF2     | LRR37A11F | GSG1L          | LINC01340 | SLC39A1      | IPO5P1    | SNX27         |
| ZNF337    | DSCAML1   | CYP1B1         | SCPEP1    | AZI2         | ZNF101    | LINC00993     |
| PDGFRA    | MIR323B   | MIR1207        | MAPK6     | FBXO22       | FGF12     | HDAC4         |
| TMC7      | FJX1      | ABCA8          | BCO1      | ZNF341       | FAM209B   | HDAC9         |
| APIP      | HTR5A     | DNAJB2         | GTDC1     | ZNF436       | ABHD16B   | ONCUT1        |
| TMC1      | CRNN      | OR4D2          | COL26A1   | ZNF431       | SLC7A5    | TMEM161A      |
| HIST1H4C  | MAPK14    | SDR9C7         | FOXN3     | ZNF430       | UGCG      | AHI1          |
| ZNF331    | KRIT1     | LINC00342      | DUSP1     | ZNF345       | LOC441242 | ZFH3          |
| TEX14     | FOXH1     | LOC101927487   | SGPP1     | ZNF432       | MTHFS     | XRCC4         |
| AMPD1     | MIR1273H  | RNU6-83P       | LINC01184 | ZNF347       | SNUPN     | KIF15         |
| EIF2B5    | FAM217B   | HNRNPAB        | GABPB2    | ZNF439       | COL9A3    | FANCD2        |
| EIF2B3    | NCOR2     | HAS2           | ACTN3     | VGLL4        | UNC13B    | ST6GALNAC6    |
| LOC100129 | NCOR1     | F13B           | GABPB1    | ZNF346       | UNC13C    | RGS19         |
| PI4KB     | KRTAP5-11 | PHIP           | ATP8A2    | FGD5         | SYNE1     | MESP1         |
| CSMD3     | FZD1      | LOC81691       | MARK3     | PUS1         | MNAT1     | MESP2         |
| LGR6      | SCAPER    | ELMOD3         | PAQR5     | SERPINA13P   | POMK      | PARP4         |
| MPHOSPH6  | BTG2      | DMXL1          | SNAR-A3   | MACC1        | MAD2L1BP  | C15ORF38-AP35 |
| LOC102659 | AKR1B15   | ZNF808         | TOMM70A   | ZNF433       | YTHDC2    | ATXN7L1       |
| TXNIP     | ZNF624    | CITED2         | TGS1      | FGD3         | TRPS1     | AKR1C3        |
| LOC101929 | ZNF626    | LOC101927311   | RAD54B    | FGD2         | ZNF527    | NLRP7         |

|            |              |              |              |              |            |              |
|------------|--------------|--------------|--------------|--------------|------------|--------------|
| TOR3A      | TEC          | SYCP2        | METTL8       | GNB5         | ZNF525     | LOC102724084 |
| LOC1019296 | ZNF620       | TAOK3        | SIL1         | AMBRA1       | LOC1019285 | BLVRA        |
| MIR6871    | ZNF621       | FAM65C       | WWTR1        | LOC100287944 | GM140      | P2RY6        |
| NOTCH2NL   | CACNB4       | LIME1        | LEP          | TMEM9        | ZNF529     | PSEN1        |
| CFLAR      | MIR454       | SLC22A15     | TBC1D19      | NUDT17       | ZNF528     | PCDHA1       |
| MECOM      | NBN          | GRIK4        | MORF4L1      | SATB1        | RIN3       | ADAP1        |
| RSPH1      | TMEM30B      | CRTC3        | TPTE2P5      | ZNF253       | MET        | WDR27        |
| CSF1R      | ZFP14        | TTLL3        | TBC1D16      | BTD          | EMP2       | PDZD2        |
| PRPF40B    | RAP2B        | CA3          | TBC1D17      | C11orf80     | WVOX       | TRAPPC10     |
| TPM1       | SIAH2        | MDM2         | TBC1D15      | TMEM5        | GLT6D1     | TRAPPC12     |
| CIB3       | LMNB1        | MIR296       | KCTD3        | CNNM3        | ZNF420     | RAB13        |
| TNFSF8     | KCNQ1OT1     | NSMCE2       | KCTD2        | C1orf27      | RPS6KB1    | LYST         |
| PLEKHA3    | ZFP36L1      | PNP          | DHX30        | PIP5K1A      | STEAP4     | SEMA3C       |
| MYT1L      | TRIM36       | COBL         | ADAM12       | STX6         | GLP2R      | PPP1R12A     |
| PRELP      | MLXIP        | POLR3E       | UST          | BASP1        | CLPX       | LYSMD2       |
| UTP18      | LYZL1        | MIR298       | AMZ2P1       | GDPD1        | RPS14      | KLHL12       |
| FAM117A    | ZER1         | CA1          | FAM83B       | PARD3B       | ZNF251     | MED22        |
| ETFA       | PHLPP2       | ZNF793       | FAM83A       | POLR1D       | ZNF250     | PPP1R12B     |
| TRIO       | C10orf91     | RNF139       | CPNE9        | SLC4A10      | LEKR1      | GOLT1A       |
| DPAGT1     | C15orf40     | OBSCN        | C12orf73     | TGFB2        | SLC25A32   | RRS1         |
| PHACTR3    | ADK          | AMOTL2       | SERPINA6     | TGFB3        | RUNDC3B    | GAB2         |
| PHACTR2    | RASGRF1      | PLEKHF2      | EXOC6B       | TDRKH        | ZNF254     | LOC102724710 |
| TET3       | B3GALNT1     | PTK6         | PLOD2        | MTERF1       | ZNF257     | SPATA33      |
| LOC1019279 | ZNF480       | RABGAP1      | PLOD3        | LOC389831    | ZNF256     | ASCL5        |
| CELSR2     | MEIG1        | SF3B1        | TPRXL        | FBRSL1       | LOC1019295 | COL5A1       |
| IER5L      | TACC3        | MSH6         | RNU6-81P     | LETMD1       | DCAF11     | PEX2         |
| ENY2       | ZNF484       | SPECC1       | C5orf24      | GTF2A1       | LOC1019295 | IGF2BP1      |
| LOC1019268 | ZNF485       | CYP17A1      | VKORC1L1     | SLC5A7       | RIPK4      | TOB1         |
| PTCHD2     | ZNF486       | AFG3L1P      | RFTN2        | FLJ36000     | DSCAM      | UNK          |
| TSEN54     | ZNF487       | ADORA1       | RFTN1        | LOC100506175 | LOC1005070 | CD101        |
| SLMO2      | ZNF138       | GAL3ST2      | DGKI         | NBPF18P      | UBASH3A    | MAPK9        |
| DDX19B     | PIAS3        | SEMA6C       | PXN          | IQGAP1       | AVL9       | NELFCD       |
| FSD1L      | DEK          | SEMA6A       | DGKB         | UIMC1        | ZNF818P    | SLC31A1      |
| LINC01440  | PRKACB       | MUC3A        | PCF11        | YWHAZ        | LOC1024672 | LINC00534    |
| LINC01441  | MIR1208      | NSMCE4A      | DGKE         | ARHGAP44     | TMEM183A   | GTPBP10      |
| TMED10P1   | DECR1        | DDHD1        | LOC104054148 | HDGFRP3      | TMEM183B   | ZFP37        |
| RAB15      | PSMB4        | ADCK4        | SNORA76C     | MTMR11       | C1GALT1    | HKR1         |
| LRRC34     | ZNF134       | SUN1         | RAD21        | CASQ2        | COPZ2      | CNBD1        |
| YOD1       | ZNF135       | NAA16        | DDX58        | TGOLN2       | ZNF419     |              |
| ZNF33B     | ZNF136       | SUPT3H       | PTGIS        | GNRHR2       | ZNF418     | ACSBG1       |
| FANCI      | RPS3         | C3orf33      | ZNF324B      | MIR3194      | ZNF417     | USP8         |
| LOC400548  | ZNF317       | CCDC71L      | LINC00964    | ICA1         | DCAF7      | RPP25        |
| ZNF33A     | KALRN        | DNAJC14      | DDX59        | ETS2         | ZNF415     | ERCC1        |
| SH3PXD2B   | LOC100506470 | DNAJC15      | LINC00963    | ARNT         | C12ORF42   | USP2         |
| RMST       | TEX36        | NARFL        | USP15        | RPE          | ZMIZ1      | ACN9         |
| FAM117B    | TFF3         | LOC101928135 | MIR7851      | LINC01164    | DAPK1      | RPRD1A       |
| LOC1019280 | LOC285692    | NANP         | ZNF878       | SENP6        | ULK2       | SPATS2       |

9-Sep



|            |              |              |           |              |            |              |
|------------|--------------|--------------|-----------|--------------|------------|--------------|
| LOC400541  | LOC285696    | C16orf47     | MIR7853   | PCMTD2       | NR3C2      | NDRG1        |
| FER1L6     | NOTCH3       | XPR1         | SSBP2     | ZBTB1        | NR3C1      | HIP1         |
| VMP1       | RMI2         | FEM1B        | PACS1     | PDP1         | LOC729911  | ZNF721       |
| SNORA11B   | CORO7        | FEM1C        | PACS2     | RP9          | DCAF5      | ZNF720       |
| KTN1       | CIART        | PPP1R13B     | LINC00969 | CARD11       | KCNJ15     | SERTAD2      |
| PCBD2      | DIDO1        | MATN2        | FAM63A    | HRASLS5      | AP5M1      | ZNF727       |
| PRDX6      | KCNK9        | FUT1         | USPL1     | MGAT2        | TARS       | ZNF726       |
| LINC01270  | SNORD26      | PRKCA        | RBM17     | LOC101927588 | MYNN       | ZNF729       |
| AP3S2      | NEK10        | PRKCE        | ATF1      | DYNC1H1      | NMD3       | ZNF728       |
| TSNAX-DISC | TCFL5        | FLJ16171     | RNF169    | LINC00494    | TNN        | ZNF468       |
| BMPER      | CRY1         | TANC2        | TXNDC16   | CASC8        | GPATCH2    | PRR7         |
| LINC00645  | KCNK2        | PRKCZ        | UNC45A    | CALD1        | HM13       | ABCB1        |
| SYNJ2BP-CO | ZNF556       | METTL21B     | RLTPR     | TBKBP1       | LOC1005071 | MED13        |
| SMOC1      | ZNF557       | LMAN2        | TMEM25    | SNAR-B2      | C20orf85   | LOC100130987 |
| LINC01272  | ZNF554       | MCL1         | C8orf76   | CTU2         | ACTN1      | MIR570       |
| RBBP9      | ZNF555       | HIST2H2AC    | ZBTB43    | CHST15       | PTPRT      | LOC100128164 |
| MIR4638    | ATP13A1      | ENDOU        | ZBTB45    | VAMP4        | CFAP58     | AEN          |
| NBPF13P    | RSAD1        | BDH1         | ZBTB46    | FBXL6        | ACTN4      | DSCR3        |
| CCDC169    | ZNF550       | SEC11A       | GORASP2   | CSTF1        | PRPF38B    | SMURF1       |
| CFAP43     | ZNF551       | WDR72        | AHNAK2    | FIBP         | PTPRG      | KCND3        |
| NPTN       | NACC2        | ZNF157       | SNHG21    | COL20A1      | KCNT2      | TMEM249      |
| AXIN2      | ZNF90        | ZNF154       | PRKAG2    | TSHB         | PTPRB      | INTS5        |
| CTCFL      | ACOT13       | DDX24        | SCG3      | C14ORF182    | PTPRO      | INTS4        |
| MMRN2      | ADRM1        | LINC01535    | RIC1      | RIPK2        | RNLS       | ANKRD34A     |
| POR        | ZNF558       | MAP1LC3B     | JPH3      | PITPNC1      | PTPRK      | DIRC3        |
| CCDC166    | TRAF3        | SAE1         | HIPK1     | GLCCI1       | PTPRJ      | INTS8        |
| ZNF8       | TRAF4        | ZNF790       | SMARCC1   | BPTF         | DTWD1      | LOC100507377 |
| ZNF252P    | LOC101243545 | ZNF91        | ANP32B    | BCL2L1       | UBL3       | THEM5        |
| ARL1       | RPA3OS       | ZNF792       | SLC39A13  | SLC6A6       | CPO        | TMEM243      |
| ZNF559-ZNF | RMDN1        | ZNF93        | ANP32A    | NDUFB9       | ZNF814     | ZNF69        |
| SYNDIG1    | HOOK2        | DTNB         | SYNPR     | NCR3LG1      | STK10      | THEM4        |
| LINC00861  | TMPRSS2      | ATP6V1C1     | SEMA4B    | PCCB         | POLG2      | TNFRSF11B    |
| OGFR       | TMPRSS3      | ZNF98        | SEMA4C    | GPR39        | CPE        | CYB561D1     |
| CDC5L      | TMPRSS4      | ZNF799       | LEMD3     | CHN2         | MFAP3      | FAM227B      |
| VASN       | MIR4729      | FLVCR2       | NOS3      | CTSS         | FKBP2      | LOC101928516 |
| RAC1       | MAPKAP1      | LOC100506457 | OTUD7B    | IL24         | RPTN       | CTNNA1       |
| RUFY1      | KAT6B        | RAB3IP       | NCAN      | LOC730202    | CPQ        | CTNNA3       |
| VCL        | CACNG4       | VPS37C       | AMZ1      | LOC643339    | LOC153910  | TAMM41       |
| NBPF15     | LINC01461    | C12orf10     | AMZ2      | NAALADL2     | GAPVD1     | LOC643770    |
| SKIL       | DENND1A      | TACO1        | ZFYVE16   | PDE4A        | LOC1019293 | IST1         |
| NBPF10     | LINC01465    | ATF7IP       | ALMS1     | PECAM1       | CASS4      | CHRNA5       |
| CHCHD6     | FOXN2        | GPER1        | ATRNL1    | DCAF10       | LOC1005067 | AZIN1        |
| CADPS      | NEBL         | PPIL6        | MKRN2OS   | ZRANB3       | CYP46A1    | NOTCH2       |
| NPSR1      | SPATA2L      | ACHE         | MRPL50    | TPD52        | NBEA       | STXBPSL      |
| LYPLAL1    | RPL38        | RALGPS2      | SCN4A     | FMNL3        | APBB2      | CACNG1       |
| CYP7B1     | RPL37        | KCNB1        | SCN4B     | IL12RB2      | STARD10    | MLPH         |
| TUFM       | RPL32        | TMED10       | CDS1      | CBFA2T3      | NOB1       | CCDC58       |

|            |           |              |              |              |            |              |
|------------|-----------|--------------|--------------|--------------|------------|--------------|
| AGR2       | RPL30     | MIR6839      | MIR1206      | STAP1        | KCTD5      | CACNG5       |
| LOC1019275 | C1ORF185  | PRPF39       | ARHGEF11     | CTDSP2       | IRAK2      | ZNF652       |
| SLC16A6    | MIR635    | PPP1R3D      | MIR1204      | ENSA         | SV2B       | MIR663AHG    |
| MAN2A2     | GNA14     | MAP3K3       | MIR1205      | UMAD1        | LOC1019295 | LMAN1L       |
| BCKDHB     | GNA12     | CNGB3        | MIR1203      | PLEKHO1      | DEGS2      | HSF5         |
| ABRA       | GNA13     | MAP3K1       | TRIQQ        | MC1R         | NR5A2      | MLEC         |
| WIPF3      | MIR142    | BCLAF1       | CYP1A1       | AQP5         | TATDN1     | EPB41L4B     |
| ARHGAP39   | ZSCAN12P1 | MAP3K5       | ZNF682       | LINC00689    | FAIM2      | SESTD1       |
| WIPF1      | ATF7      | ZNF570       | ZNF677       | VRK3         | MYO15B     | RAPGEF4      |
| PTCH1      | ZNF286A   | ZNF571       | ZNF680       | CRYL1        | WRB        | FIRRE        |
| ZSCAN32    | SLC4A1AP  | ZNF681       | ZNF687       | LOC101927421 | DYSF       | SLC30A8      |
| ZSCAN31    | SHARPIN   | SYNE2        | ZNF684       | IRF2BPL      | LOC1019277 | ATP2C2       |
| FNDC3B     | SLC30A6   | MIPOL1       | LINC01005    | MRPL3        | SGK3       | KMT2C        |
| TRPM7      | RANBP17   | FLJ22447     | LOC101928973 | LOC101929106 | ZNF670-ZNF | ESRRG        |
| NINL       | FURIN     | MDM4         | LOC100506730 | WDYHV1       | LRP4       | PDSS2        |
| TRPM2      | LINGO4    | ROR2         | SUMF1        | MRPL1        | GALNT11    | LOC63930     |
| TRPM3      | ZNF354A   | MAN1A2       | NCALD        | EIF3E        | ZNF268     | COL18A1      |
| ROMO1      | CERS3     | GMPS         | ZBP1         | OLFM1        | MIR3134    | MIR6723      |
| XRN2       | POC1B     | RSPO2        | PPP4R1L      | HIST1H4B     | ESR1       | SERPINA3     |
| KAT2B      | TSNARE1   | ULK3         | LINC01126    | ZFP30        | ASNS       | RHOBTB3      |
| GID8       | SELENBP1  | SNRPD3       | PCDHB5       | RHOT2        | PLXNA4     | NUMB         |
| ACSF3      | EML1      | MIR181A1HG   | CLSTN1       | RNU6-72P     | TBC1D9B    | ALDOA        |
| MAL2       | RORC      | MYLK         | MKS1         | ARHGEF1      | OR4K17     | INO80D       |
| SGOL1      | MPP5      | ZNF273       | PC           | PSTPIP1      | TMTC2      | ATP1B1       |
| SGOL2      | EML5      | WDR93        | DNASE2       | FAM173A      | LINC00479  | INO80B       |
| TUBB1      | MIR4692   | MPHOSPH10    | RYR1         | RAF1         | PSCA       | MIR3680-1    |
| MB21D2     | NXPE3     | 6-Mar        | SNORD116-4   | BCAS3        | PDE4D      | C1ORF101     |
| CORO2A     | MAGI3     | BOLA1        | TCHHL1       | BCAS1        | HARS2      | FMN1         |
| CASC19     | MAMLD1    | ZNF276       | WNT8B        | EHMT1        | MAP4K3     | ZNF718       |
| CR1        | MAGI1     | KPNA1        | ZFP2         | APH1A        | STKLD1     | FAM43A       |
| GALK1      | ZNF471    | SCAND1       | ZFP3         | STAT4        | MAP4K5     | ZNF714       |
| IMPG1      | ZNF470    | MYO5C        | NAV1         | SEC23A       | LINC00879  | ZNF716       |
| FAM174B    | ZNF473    | MYO5A        | KIAA0825     | SNX11        | CDH17      | ZNF710       |
| LINC00854  | LINGO2    | KCNV1        | ZNF660       | CD55         | LOC1019272 | FCHSD2       |
| CYP19A1    | HES1      | IFT43        | RPIA         | CCAT2        | LINC00877  | ZNF860       |
| PTPN9      | GUSB      | SYNM         | ZNF662       | NBPF20       | JUNB       | ZNF713       |
| FAM168A    | SPEF1     | IFT46        | ZNF665       | PCDHGA7      | LINC00871  | COMMD10      |
| C17orf58   | ZNF271P   | PKP1         | ZNF667       | LINC01056    | MAP2K3     | CPNE3        |
| PCDHGA9    | ZNF542P   | PLGRKT       | MIR3150A     | STOX1        | TMEM43     | IPP          |
| POLE3      | FAM210A   | MIR3916      | SCAMP5       | ICAM2        | MAP2K5     | LOC100630923 |
| POLE2      | SNTG1     | FRS2         | SCAMP2       | CPAMD8       | ZMYND11    | SERPINA9     |
| DHRS7      | SNTG2     | NBPF25P      | FNIP1        | FGFBP3       | AACS       | HAO1         |
| STK39      | BZRAP1    | ITGA10       | ABCC5        | PCDHGA5      | BCL9L      | HTR1F        |
| TMLHE      | SLC25A21  | LOC101928979 | TMED3        | BCL7C        | LOC1019270 | ZNF625-ZNF20 |
| SYN2       | SLC25A24  | LOC101928977 | MBLAC1       | DPM1         | ZNF204P    | ABCC1        |
| SYN3       | CFAP70    | TSHR         | SMIM5        | CKB          | MICU1      | ZNF512B      |
| TFDP1      | RPLP0     | CRH          | CGN          | LOC101927391 | PTPN22     | DNAH14       |

|           |              |           |              |              |            |              |
|-----------|--------------|-----------|--------------|--------------|------------|--------------|
| FNTB      | TCHH         | TMEM182   | BAIAP2L1     | NDUFA13      | LOC1005007 | FAM160A1     |
| KIAA1244  | ZKSCAN5      | PIK3R5    | SMIM8        | EFNA1        | C7orf49    | DNAH10       |
| BOLL      | ZKSCAN7      | PVRL4     | SHANK2       | MIR589       | PTPN21     | LOC100379224 |
| PRPF4B    | LOC79160     | PIK3R1    | HNRNPK       | ANG          | RHBDF1     | TMOD2        |
| ENPP1     | ZKSCAN8      | LOC646736 | REEP1        | TPD52L2      | CHIT1      | NME1-NME2    |
| TSPAN2    | RBBP8NL      | ZNF287    | TCF25        | TPD52L1      | PPL        | ZNF79        |
| UMODL1    | KDM5B        | IFT122    | ARMC1        | EFCAB11      | GAN        | LDLRAD4      |
| CT62      | PLS1         | ZNF282    | HNRNPD       | TYW5         | EHD1       | YY1          |
| ATP2B2    | ZNF280D      | ZNF283    | HNRNPF       | SLC33A1      | DAAM1      | ZNF77        |
| ATP2B4    | AFAP1L1      | PTPRN2    | LOC101927657 | TMEM87B      | ACY3       | SPINT2       |
| FAM193B   | GLIS3        | MIR124-3  | TSKU         | GALNT14      | FANK1      | IL10RA       |
| ZNF445    | ZNF19        | LNX2      | SREK1IP1     | LOC101928048 | ATP5G2     | SNORD116-8   |
| CABLES2   | CHMP3        | MIR4257   | PRUNE        | RCOR1        | LRP10      | PLEKHG4      |
| ZNF440    | MUC20        | TMEM189   | APRT         | LOC644554    | LRP12      | SLC7A14      |
| ZNF441    | DNM2         | TLE1      | SLC13A1      | RNF168       | LINC00885  | CD160        |
| ZNF442    | EED          | LINC01481 | HDLBP        | KCNK12       | CLASP2     | BBS4         |
| ZNF443    | MAPKAPK2     | LIX1L     | CHRNA4       | C7ORF60      | LINC00886  | SLC7A13      |
| KRTAP10-5 | ICT1         | DSTN      | LINC01336    | CHGA         | KIAA1755   | COX6C        |
| MIR548H2  | PREX1        | HSF2BP    | ERP44        | CD58         | RNU6-71P   | SIGLEC9      |
| MEGF11    | TUBA1C       | C14orf166 | CHRNA7       | HMGCS2       | ORC5       | INSL4        |
| CD2AP     | CPA3         | CEACAM21  | RMDN3        | TMEM26       | LOC1019272 | SELT         |
| ZKSCAN1   | FKBP1AP1     | TAF7      | CHD2         | PDE9A        | ACAP2      | SPATA2       |
| SUPT4H1   | LINC01484    | TAF6      | PCDHB19P     | UGT1A8       | ABCC3      | SERPINH1     |
| PDXK      | LOC101929164 | TUBAL3    | PLEKHA8P1    | CIT          | SLC11A2    | LINC00316    |
| SS18L1    | DOK5         | TAF3      | ZNF107       | ACBD6        | LINC00313  | CYB561       |
| LOC400706 | LDHD         | LINC01136 | RGS16        | MIS18BP1     | OR1F1      | LOC100996348 |
| C9ORF129  | MIR3614      | AP1G1     | STAU1        | ZNF354B      | C10ORF53   | SLC2A4RG     |
| ABL1      | MTA1         | USP10     | ZNF767P      | CST6         | BBS9       | SF3A3        |
| TNFAIP8L3 | MTA2         | BCAS4     | FAAH         | TATDN2       | SEC22B     | C4ORF36      |
| NCAM2     | MTA3         | DCAF4L2   | C7           | ADNP         | SEC22A     | ZNF100       |
| MIR5707   | POGZ         | BTBD1     | XKR9         | LRP1B        | ZNF274     | EHD4         |
| CASC11    | ISG20        | LINC00301 | EXOSC8       | GLI1         | ADAMTSL4   | EHD2         |
| LINC00265 | HSP90AA1     | CASC15    | RGS18        | TTLL11       | LINC00403  |              |

| <b>TRIM28 direct<br/>repressed target genes</b> | <b>TRIM28 direct<br/>activated target genes</b> |
|-------------------------------------------------|-------------------------------------------------|
| C12ORF56                                        | CDH13                                           |
| BAG3                                            | TMC7                                            |
| ZNF334                                          | C10ORF107                                       |
| SLC4A10                                         | UBE2QL1                                         |
| SKAP1                                           | GLIS3                                           |
| ZNF257                                          | TEX14                                           |
| ZNF853                                          | EPHA3                                           |
| SLC30A8                                         | CPE                                             |
| LINC00645                                       | CHGA                                            |
| DSCAM                                           | AFF3                                            |
| LAMB1                                           | BMPER                                           |
| CPQ                                             | LRFN5                                           |
| BCAS1                                           | ADAMTS19                                        |
| LMBR1                                           | GABBR2                                          |
| ATRNL1                                          | KIAA1217                                        |
| ZNF486                                          | PKHD1L1                                         |
| RNF217                                          | SEMA6A                                          |
| ZNF729                                          | CASQ2                                           |
| ZNF626                                          | RUNDC3B                                         |
| NEK9                                            | CBLN4                                           |
| ZNF264                                          | ADAMTS9                                         |
| RFTN2                                           | SULF1                                           |
| SDR9C7                                          | LRP1B                                           |
| RMST                                            | PLCH1                                           |
| HRH1                                            | FAM129A                                         |
| ABCG2                                           | SLC16A10                                        |
| ZNF415                                          | CCDC33                                          |
| SV2B                                            | REEP1                                           |
| B3GALT5                                         | CNTNAP2                                         |
| NR3C1                                           | NCAM2                                           |
| SPATA17                                         | S100A16                                         |
| COL9A3                                          | UST                                             |
| C10ORF11                                        | PPP1R14C                                        |
| ATP8A2                                          | DAPK1                                           |
| DIRC3                                           | GBE1                                            |
| PLA2G16                                         | PTPRN2                                          |
| ZNF208                                          | CBLB                                            |
| FAM84A                                          | JAKMIP1                                         |
| HTR7                                            | TSKU                                            |
| INHBA-AS1                                       | LTBP1                                           |
| SPAM1                                           | HAR1A                                           |

|           |           |
|-----------|-----------|
| DCDC2     | STRA6     |
| ZNF676    | BMP5      |
| AKAP6     | TMPRSS4   |
| DNAH6     | KIAA0226L |
| ZNF737    | STON2     |
| ZNF883    | NMNAT2    |
| ZNF716    | ZNF583    |
| GPR158    | TNFRSF11B |
| ZNF679    | DENND1A   |
| LINC00578 | PLEKHO1   |
| CMTM8     | ARNT2     |
| ZNF91     | ZNF804B   |
| PCDH15    | BMP7      |
| COL21A1   | CD101     |
| WIPF1     | PLAGL1    |
| ZSCAN30   | F5        |
| BOLL      | ROBO1     |
| ZNF506    | NTN1      |
| FOXP2     | STEAP4    |
| CDH17     | ZFP37     |
| ZNF491    | SPOCK1    |
| ZNF702P   | HS6ST2    |
| PHLDA1    | LIMA1     |
| INSL4     | PDE4D     |
| CNGB3     | WDR72     |
| PCDHB5    | CCBL1     |
| ZNF347    | SYN3      |
| C20ORF195 | GLP2R     |
| LDHD      | PRSS23    |
| ZNF788    | BCL11B    |
| ZNF439    | ONECUT1   |
| NECAB1    | DNAJC22   |
| MYT1      | TFF3      |
| LONRF2    | SLC2A10   |
| PHACTR3   | ANKRD35   |
| ENG       | OLFM1     |
| ANXA9     | RUNX1T1   |
| ZNF69     | PKP1      |
| SYCP2     | TPK1      |
| FAM63A    | C3ORF70   |
| CYP1A1    | SERPINE1  |
| ABCA12    | PTPN22    |
| ZNF441    | NTNG1     |

|           |            |
|-----------|------------|
| ZNF442    | HRNR       |
| ZNF563    | HAR1B      |
| ZNF844    | NAALADL2   |
| SPAG17    | FAM178B    |
| LINC00534 | TTLL11     |
| STC2      | DIO2       |
| ZNF98     | CXCR4      |
|           | ATP6V0D2   |
|           | RIMS2      |
|           | PDZK1      |
|           | HMGCS2     |
|           | TMPRSS3    |
|           | MYEOV      |
|           | SHC3       |
|           | VGFB       |
|           | SLC12A2    |
|           | LARGE      |
|           | LINC00665  |
|           | TFF1       |
|           | CT62       |
|           | ZFP82      |
|           | SHH        |
|           | ZNF256     |
|           | MAPK8IP1   |
|           | AXIN2      |
|           | GPR39      |
|           | CSRFP2     |
|           | ZNF880     |
|           | POC1B      |
|           | FAM43A     |
|           | CA2        |
|           | VAV3       |
|           | SPDEF      |
|           | NTSR1      |
|           | CALML5     |
|           | LRRC10B    |
|           | ELOVL2-AS1 |
|           | FBXO32     |
|           | SYBU       |
|           | PSCA       |
|           | CTHRC1     |
|           | MYO10      |

## Supplementary Table S11: hTRIM28 Deletion Mutants Primers

|                                                |                                                                       |
|------------------------------------------------|-----------------------------------------------------------------------|
| hTRIM28                                        |                                                                       |
| delRING-F                                      | gccgaggcgctggagttctccaaagacatc                                        |
| delRING-R                                      | gatgtctttggagaactccagcgcctcggc                                        |
| del-CC-antisense                               | 5'-gccttcctgcacctcctggactggtggtc-3'                                   |
| del-CC                                         | 5'-gaccaccagtaccaggaggtgcaggaaggc-3'                                  |
| del-RBB                                        | 5'-ggcgctggagctgctgttcttagaggatgcag-3'                                |
| del-RBB-antisense                              | 5'-ctgcatcctctaagaacagcagctccagcgcc-3'                                |
| del-RB-antisense                               | 5'-cagcactggttcgcctccagcagctcca-3'                                    |
| del-RB                                         | 5'-tggagctgctggaggcgaaccagtgctg-3'                                    |
| del-B-Box                                      | 5'-caccgacgcccaggatttagaggatgcagtga-3'                                |
| del-B-Box -antisense                           | 5'-tcaactgcatcctctaaatcctgggcgtcggtg-3'                               |
| delLinker-antisense                            | 5'-ggcagacacggcacatgggctggctg-3'                                      |
| delLinker                                      | 5'-cagccagcccattgtgccgtgctgcc-3'                                      |
| del-PB                                         | 5'-ggatgacagtgccaccattaccaagtctctgct-3'                               |
| del-PB-antisense                               | 5'-agcagagaactggtaatggtggcactgtcatcc-3'                               |
| shTRIM28-resistant<br><i>TRIM28</i>            | 5'-cctgtcctcagtaactgttaaactgttaaacatccggccc<br>acatcctgggcaaact-3'    |
| shTRIM28-resistant<br><i>TRIM28</i> -antisense | 5'-agtttcccaggatgtggccggatgttaaacagtttaac<br>aagttaactgaggacaagg-3'   |
| shEZH2-resistant<br><i>EZH2</i>                | 5'-cggcagccttgtgacagttcgtgtccatgagtaatcgccca<br>aaatttgtgaaaagtttg-3' |
| shEZH2-resistant<br><i>EZH2</i> -antisense     | 5'-caaaactttcacaaaaatgtggcgattactcatggacac<br>gaactgtcacaaggctgccg-3' |

**Table S12.1: Oligonucleotide sequences for Real Time qPCR analysis**

|                     |                               |
|---------------------|-------------------------------|
| hTRIM28-RT-F1       | TTTCATGCGTGATAGTGGCAG         |
| hTRIM28-RT-R1       | GCCTCTACACAGGTCTCACAC         |
| hTRIM28-RT-F2       | CGGGATGGTGAACGTA CTGTC        |
| hTRIM28-RT-R2       | GTCTCGGCAGGTGAGAGTATC         |
| EZH2-RT-F2          | GAGACTGGCGAAGAGCTGTTT         |
| EZH2-RT-R2          | GGCATCAGCCTGGCTGTATC          |
| EZH2-RT-F3          | CCCTGACCTCTGTCTTACTTGTGGA     |
| EZH2-RT-R3          | ACGTCAGATGGTGCCAGCAATA        |
| $\beta$ -Actin-RT-F | TCATGAAGTGTGACGTTGACATCCGT    |
| $\beta$ -Actin-RT-R | CCTAGAAGCACTTGCGGTGCACGATGGAG |
| hCXCR4-RT-F1        | ACTACACCGAGGAAATGGGCT         |
| hCXCR4-RT-R1        | CCCACAATGCCAGTTAAGAAGA        |
| hCXCR4-RT-F2        | ACGCCACCAACAGTCAGAG           |
| hCXCR4-RT-R2        | AGTCGGGAATAGTCAGCAGGA         |
| hCA2-RT-F1          | GGGTACGGCAAACACAACG           |
| hCA2-RT-R1          | GGCTGTATGAGTGTGCGATGTC        |
| SULF1-RT-F1         | GATCCCCGAGGTTTCAGAGGA         |
| SULF1-RT-R1         | GGTGTAGTCACAAAGGCATTGA        |
| JAKMIP1-RT-F1       | GACGAGCGAGATGTGAGGC           |
| JAKMIP1-RT-R1       | GCCAACAGCGTATTTCTGTCTT        |
| BCL11B-RT-F1        | GGTGCCTGCTATGACAAGG           |
| BCL11B-RT-R1        | GGCTCGGACACTTTCCTGAG          |
| BAI2-RT-F1          | TGGGCAAGGGACATAGGATGA         |
| BAI2-RT-R1          | CGAGGCGATGGTAGGAAAGA          |
| hONECUT1-RT-F1      | GAACATGGGAAGGATAGAGGCA        |
| hONECUT1-RT-R1      | GTAGAGTTCGACGCTGGACAT         |
| hSTRA6-RT-F1        | CCACAGAGGACTACTCCTATGG        |
| hSTRA6-RT-R1        | CAGCACAAGGATTGACAGCG          |
| hMYEOV-RT-F1        | TGAGCAGGCCATTAGCTCG           |
| hMYEOV-RT-R1        | CATCCATTCGCGCCACATA           |
| hCNTNAP2-RT-F1      | CTTTGGCAATCGGAAGCAGAT         |
| hCNTNAP2-RT-R1      | GAGCATCCGGTATTGGGTAC          |
| hCCBL1-RT-F1        | CCAGTGGATGGTCTACGACG          |
| hCCBL1-RT-R1        | CTCCCGTTCAAAGCTCTCG           |
| hKIAA1217-RT-F1     | GTGAGGTCAACCAACCAGACG         |
| hKIAA1217-RT-R1     | TGATTTTCATTTCGGCATCCTGAG      |
| hNTNG1-RT-F1        | AAGTTTGGGATTACATGGCCTG        |
| hNTNG1-RT-R1        | CGGAGGATCGAGTTTCACTTTC        |
| hFAM129A-RT-F1      | AGACCGGCTTATGAATCTTCCG        |
| hFAM129A-RT-R1      | GCTCGTGAAGCAGGTTGAC           |
| hBMP5-RT-F1         | GCTGCTGGGTTCTAGTGGG           |



hBMP5-RT-R1

TTCGTGGTTCGTTAGTCTTCTA

**Table S12.2: Oligonucleotide sequences for Real Time qPCR analysis after ChIP**

|                  |                      |
|------------------|----------------------|
| CXCR4-ChIP-F1    | CAGCCCATTCAGGAGGTAAA |
| CXCR4-ChIP-R1    | TGCACCTGACCCTAGTGATG |
| CXCR4-ChIP-F2    | CTTCCTTCGGAGGATGTAGC |
| CXCR4-ChIP-R2    | TGCACCTGACCCTAGTGATG |
| CXCR4-Distal-F   | CAAGGCAGGTGCCATTACTT |
| CXCR4-Distal-R   | GACTGGGTGCAGATCCTCAT |
| KIAA1217-ChIP-F1 | TCCAACTTTGGGGAAAGAGA |
| KIAA1217-ChIP-R1 | CAGGGAAGCAGAGTTTGGAG |
| KIAA1217-ChIP-F2 | CCCATTTACCTAGGCCGTTT |
| KIAA1217-ChIP-R2 | ACATCCAACCACAGGCTACC |
| MYEOV-ChIP-F1    | CAACGCCATCATTATCACCA |
| MYEOV-ChIP-R1    | CCAGCCCACCTGTAAATCA  |
| SULF1-ChIP-F1    | CTCAGCCTCCAATCCGTAAG |
| SULF1-ChIP-R1    | TTGAAACACGTCCTCAAGCA |
| SULF1-ChIP-F2    | TGTCCCGAAATTCACCCTTA |
| SULF1-ChIP-R2    | ACACACCCCATAGAACCAA  |
| CCBL1-ChIP-F1    | AGTGTCCGAGCGAGAATCAG |
| CCBL1-ChIP-R1    | TATAACGGAGTGGCTGCACA |
| FAM129A-ChIP-F1  | TGTTTGTTTTGCAGCCTCAC |
| FAM129A-ChIP-R1  | GCTTTGTAAGTGGCCGAAAG |
| CA2-ChIP-F1      | GCCTACGAGGAAATGCAATC |
| CA2-ChIP-R1      | GCCGTGGAATAAACGAGAC  |
| CA2-ChIP-F1      | CAATGGTCATGCTTTCAACG |
| CA2-ChIP-R1      | GCTCGGAAAACAGCTACTGG |

**Supplementary Figure 3.** A) Distribution of genomic sites of TRIM28 chromatin occupancy in MCF7 cells. Peaks are categorized as TSS (+/-3Kb), 5'UTR, 3'UTR, genic (coding exon + intron), , or intergenic. B) UCSC genome browser screenshot of tracks representing normalized sequence tags for expression of CXCR4 in shControl, shEZH2, and shTRIM28 RNA-seq, and enrichment of EZH2 (ChIP-seq in HMEC cells), and TRIM28 (ChIP-Seq in MCF7 cells) (<http://genome.ucsc.edu/>). C) UCSC genome browser screenshot of tracks representing enrichment of EZH2 (ChIP-seq in HMEC cells), and TRIM28 (ChIP-Seq in MCF7 cells) (<http://genome.ucsc.edu/>) on MYEOV and CA2 genes.

**Supplementary Figure 4.** Co-immunoprecipitation. Endogenous EZH2 was immunoprecipitated from whole cell lysates of T47D cells, followed by western blotting with antibodies for TRIM28, and SWI/SNF complex members as indicated.

**Supplementary Figure 5.** A) Brightfield images showing that mammosphere formation ability of MCF7 cells is reduced after depletion of TRIM28. Bars of graph shows the average sphere numbers  $\pm$  SEM per  $2 \times 10^3$  plated cells (\* $P < 0.05$ ). The sphere size that is more than 60  $\mu$ m was counted. Error bars represent SEM from three independent experiments (\*  $P < 0.05$ ). B) CD44<sup>+</sup>/CD24<sup>-</sup> populations analyzed by flow-cytometry analysis of control and TRIM28 depleted T47D cells with quantified results shown in the graph. Error bars represent SEM from three independent experiments (\*  $P < 0.05$ ). C) TRIM28 and CXCR4 expression analyzed by RT-qPCR in TRIM28 depleted T47D cells. Error bars represent SEM from three independent experiments (\*  $P < 0.05$ ).
